# Supplementary material for: The Solvent Effect on Composition and Dimensionality of Mercury(II) Complexes with Picolinic Acid
Source: MDPI journal article supplement (doi:10.3390/molecules26165002), 2021-08-18

# checkCIF/PLATON report

Structure factors have been supplied for datablock(s) 1

THIS REPORT IS FOR GUIDANCE ONLY. IF USED AS PART OF A REVIEW PROCEDURE FOR PUBLICATION, IT SHOULD NOT REPLACE THE EXPERTISE OF AN EXPERIENCED CRYSTALLOGRAPHIC REFEREE.

No syntax errors found.      CIF dictionary      Interpreting this report

## Datablock: 1

---

|                 |                  |                               |
|-----------------|------------------|-------------------------------|
| Bond precision: | C-C = 0.0086 Å   | Wavelength=0.71073            |
| Cell:           | a=9.0131(6)      | b=8.8569(4)      c=9.4804(6)  |
|                 | alpha=90         | beta=113.292(7)      gamma=90 |
| Temperature:    | 170 K            |                               |
|                 | Calculated       | Reported                      |
| Volume          | 695.12(8)        | 695.12(8)                     |
| Space group     | P 21/c           | P 21/c                        |
| Hall group      | -P 2ybc          | -P 2ybc                       |
| Moiety formula  | C6 H4 Cl Hg N O2 | ?                             |
| Sum formula     | C6 H4 Cl Hg N O2 | C6 H4 Cl Hg N O2              |
| Mr              | 358.14           | 358.14                        |
| Dx,g cm-3       | 3.422            | 3.422                         |
| Z               | 4                | 4                             |
| Mu (mm-1)       | 22.462           | 22.462                        |
| F000            | 640.0            | 640.0                         |
| F000'           | 632.13           |                               |
| h,k,lmax        | 10,10,11         | 10,10,11                      |
| Nref            | 1222             | 1219                          |
| Tmin,Tmax       |                  | 0.341,1.000                   |
| Tmin'           |                  |                               |

Correction method= # Reported T Limits: Tmin=0.341 Tmax=1.000  
AbsCorr = MULTI-SCAN

Data completeness= 0.998      Theta(max)= 24.996

R(reflections)= 0.0265( 1155)      wR2(reflections)= 0.0652( 1219)

S = 1.089      Npar= 100

---

The following ALERTS were generated. Each ALERT has the format  
**test-name\_ALERT\_alert-type\_alert-level.**  
Click on the hyperlinks for more details of the test.

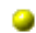

### Alert level C

|                   |                                                  |              |
|-------------------|--------------------------------------------------|--------------|
| PLAT053_ALERT_1_C | Minimum Crystal Dimension Missing (or Error) ... | Please Check |
| PLAT054_ALERT_1_C | Medium Crystal Dimension Missing (or Error) ...  | Please Check |
| PLAT055_ALERT_1_C | Maximum Crystal Dimension Missing (or Error) ... | Please Check |
| PLAT232_ALERT_2_C | Hirshfeld Test Diff (M-X) Hg1 --O2_b .           | 6.0 s.u.     |
| PLAT342_ALERT_3_C | Low Bond Precision on C-C Bonds .....            | 0.0086 Ang.  |
| PLAT369_ALERT_2_C | Long C(sp2)-C(sp2) Bond C1 - C6 .                | 1.54 Ang.    |
| PLAT911_ALERT_3_C | Missing FCF Refl Between Thmin & STh/L= 0.595    | 2 Report     |
| PLAT976_ALERT_2_C | Check Calcd Resid. Dens. 0.93A From O1           | -0.93 eA-3   |
| PLAT977_ALERT_2_C | Check Negative Difference Density on H5          | -0.40 eA-3   |

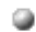

### Alert level G

|                   |                                                  |              |
|-------------------|--------------------------------------------------|--------------|
| PLAT004_ALERT_5_G | Polymeric Structure Found with Maximum Dimension | 1 Info       |
| PLAT432_ALERT_2_G | Short Inter X...Y Contact Cl1 ..C4               | 3.24 Ang.    |
|                   | 1-x,1/2+y,3/2-z =                                | 2_656 Check  |
| PLAT883_ALERT_1_G | No Info/Value for _atom_sites_solution_primary . | Please Do !  |
| PLAT909_ALERT_3_G | Percentage of I>2sig(I) Data at Theta(Max) Still | 91% Note     |
| PLAT910_ALERT_3_G | Missing # of FCF Reflection(s) Below Theta(Min). | 1 Note       |
| PLAT913_ALERT_3_G | Missing # of Very Strong Reflections in FCF .... | 1 Note       |
| PLAT933_ALERT_2_G | Number of OMIT Records in Embedded .res File ... | 2 Note       |
| PLAT965_ALERT_2_G | The SHELXL WEIGHT Optimisation has not Converged | Please Check |
| PLAT978_ALERT_2_G | Number C-C Bonds with Positive Residual Density. | 0 Info       |

0 **ALERT level A** = Most likely a serious problem - resolve or explain  
 0 **ALERT level B** = A potentially serious problem, consider carefully  
 9 **ALERT level C** = Check. Ensure it is not caused by an omission or oversight  
 9 **ALERT level G** = General information/check it is not something unexpected

4 ALERT type 1 CIF construction/syntax error, inconsistent or missing data  
 8 ALERT type 2 Indicator that the structure model may be wrong or deficient  
 5 ALERT type 3 Indicator that the structure quality may be low  
 0 ALERT type 4 Improvement, methodology, query or suggestion  
 1 ALERT type 5 Informative message, check

## Validation response form

Please find below a validation response form (VRF) that can be filled in and pasted into your CIF.

```
# start Validation Reply Form
_vrf_PLAT053_1
;
PROBLEM: Minimum Crystal Dimension Missing (or Error) ...      Please Check
RESPONSE: ...
;
_vrf_PLAT054_1
;
PROBLEM: Medium Crystal Dimension Missing (or Error) ...      Please Check
RESPONSE: ...
;
_vrf_PLAT055_1
;
PROBLEM: Maximum Crystal Dimension Missing (or Error) ...      Please Check
RESPONSE: ...
;
_vrf_PLAT232_1
;
PROBLEM: Hirshfeld Test Diff (M-X) Hg1      --O2_b      .      6.0 s.u.
RESPONSE: ...
```

```

;
_vrf_PLAT342_1
;
PROBLEM: Low Bond Precision on C-C Bonds ..... 0.0086 Ang.
RESPONSE: ...
;
_vrf_PLAT369_1
;
PROBLEM: Long C(sp2)-C(sp2) Bond C1 - C6 . 1.54 Ang.
RESPONSE: ...
;
_vrf_PLAT911_1
;
PROBLEM: Missing FCF Refl Between Thmin & STh/L= 0.595 2 Report
RESPONSE: ...
;
_vrf_PLAT976_1
;
PROBLEM: Check Calcd Resid. Dens. 0.93A From O1 -0.93 eA-3
RESPONSE: ...
;
_vrf_PLAT977_1
;
PROBLEM: Check Negative Difference Density on H5 -0.40 eA-3
RESPONSE: ...
;
# end Validation Reply Form

```

---

It is advisable to attempt to resolve as many as possible of the alerts in all categories. Often the minor alerts point to easily fixed oversights, errors and omissions in your CIF or refinement strategy, so attention to these fine details can be worthwhile. In order to resolve some of the more serious problems it may be necessary to carry out additional measurements or structure refinements. However, the purpose of your study may justify the reported deviations and the more serious of these should normally be commented upon in the discussion or experimental section of a paper or in the "special\_details" fields of the CIF. checkCIF was carefully designed to identify outliers and unusual parameters, but every test has its limitations and alerts that are not important in a particular case may appear. Conversely, the absence of alerts does not guarantee there are no aspects of the results needing attention. It is up to the individual to critically assess their own results and, if necessary, seek expert advice.

### Publication of your CIF in IUCr journals

A basic structural check has been run on your CIF. These basic checks will be run on all CIFs submitted for publication in IUCr journals (*Acta Crystallographica*, *Journal of Applied Crystallography*, *Journal of Synchrotron Radiation*); however, if you intend to submit to *Acta Crystallographica Section C* or *E* or *IUCrData*, you should make sure that full publication checks are run on the final version of your CIF prior to submission.

### Publication of your CIF in other journals

Please refer to the *Notes for Authors* of the relevant journal for any special instructions relating to CIF submission.

Datablock 1 - ellipsoid plot

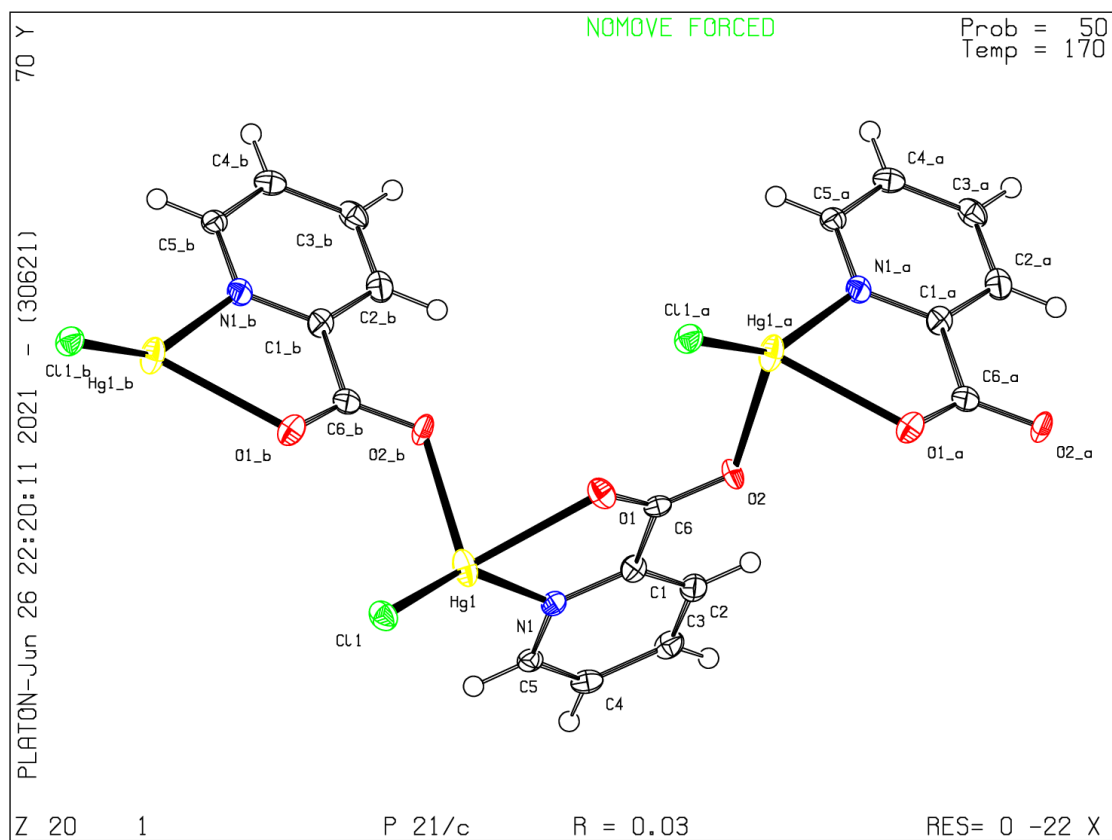

Supplement: s1 [file s1]
