# Supplementary material for: The Solvent Effect on Composition and Dimensionality of Mercury(II) Complexes with Picolinic Acid
Source: MDPI journal article supplement (doi:10.3390/molecules26165002), 2021-08-18
Supplement: s1 [file s1]

# Supplementary Materials

## **The solvent effect on composition and dimensionality of mercury(II) complexes with picolinic acid**

**Željka Soldin<sup>a\*</sup>, Boris-Marko Kukovec<sup>b\*</sup>, Dubravka Matković-Čalogović<sup>a</sup>, Zora Popović<sup>a</sup>**

*<sup>a</sup>Division of General and Inorganic Chemistry, Department of Chemistry, Faculty of Science, University of Zagreb, Horvatovac 102a, HR-10000 Zagreb, Croatia*

*<sup>b</sup>Department of Physical Chemistry, Faculty of Chemistry and Technology, University of Split, Ruđera Boškovića 35, HR-21000 Split, Croatia*

### **\*Corresponding authors:**

Ž. Soldin  
e-mail: [zeljka@chem.pmf.hr](mailto:zeljka@chem.pmf.hr)

B.-M. Kukovec  
e-mail: [bmukovec@ktf-split.hr](mailto:bmukovec@ktf-split.hr)

## 1. Crystal structures

**Table S1.** Selected bond lengths (Å) and angles (°) for {[HgCl(pic)]}<sub>n</sub> (**1**), [HgCl(pic)(picH)] (**2**) and [HgBr(pic)(picH)] (**3**).

| 1                       |          | 2          |          | 3          |          |
|-------------------------|----------|------------|----------|------------|----------|
| <i>Bond lengths</i>     |          |            |          |            |          |
| Hg1–Cl1                 | 2.335(2) | Hg1–Cl1    | 2.352(2) | Hg1–Br1    | 2.461(2) |
| Hg1–N1                  | 2.191(5) | Hg1–N1     | 2.212(5) | Hg1–N1     | 2.23(1)  |
| Hg1–O1                  | 2.411(4) | Hg1–N2     | 2.346(6) | Hg1–N2     | 2.33(1)  |
| Hg1–O2 <sup>i</sup>     | 2.373(4) | Hg1–O1     | 2.487(4) | Hg1–O1     | 2.47(1)  |
|                         |          | Hg1–O3     | 2.539(4) | Hg1–O3     | 2.52(1)  |
| <i>Bond angles</i>      |          |            |          |            |          |
| N1–Hg1–Cl1              | 147.0(1) | N1–Hg1–N2  | 115.3(2) | N1–Hg1–N2  | 114.2(4) |
| N1–Hg1–O2 <sup>i</sup>  | 96.7(2)  | N1–Hg1–Cl1 | 140.6(1) | N1–Hg1–Br1 | 137.7(3) |
| Cl1–Hg1–O2 <sup>i</sup> | 114.8(1) | N2–Hg1–Cl1 | 104.1(1) | N2–Hg1–Br1 | 108.1(3) |
| N1–Hg1–O1               | 72.6(2)  | N1–Hg1–O1  | 71.7(2)  | N1–Hg1–O1  | 71.6(4)  |
| Cl1–Hg1–O1              | 119.0(1) | N2–Hg1–O1  | 88.6(2)  | N2–Hg1–O1  | 87.9(4)  |
| O2 <sup>i</sup> –Hg1–O1 | 82.7(1)  | Cl1–Hg1–O1 | 112.1(1) | Br1–Hg1–O1 | 111.5(3) |
|                         |          | N1–Hg1–O3  | 84.3(2)  | N1–Hg1–O3  | 85.1(3)  |
|                         |          | N2–Hg1–O3  | 68.4(2)  | N2–Hg1–O3  | 68.7(4)  |
|                         |          | Cl1–Hg1–O3 | 110.1(1) | Br1–Hg1–O3 | 110.3(3) |
|                         |          | O1–Hg1–O3  | 135.7(2) | O1–Hg1–O3  | 136.7(3) |

Symmetry code (i)  $x, -y+3/2, z+1/2$ .

**Table S2.** The hydrogen bond geometry for {[HgCl(pic)]}<sub>n</sub> (**1**), [HgCl(pic)(picH)] (**2**) and [HgBr(pic)(picH)] (**3**).

|          | D–H...A     | $d(\text{D–H})/\text{\AA}$ | $d(\text{H...A})/\text{\AA}$ | $d(\text{D...A})/\text{\AA}$ | $\angle(\text{D–H...A})^\circ$ | Symmetry code on A |
|----------|-------------|----------------------------|------------------------------|------------------------------|--------------------------------|--------------------|
| <b>2</b> |             |                            |                              |                              |                                |                    |
|          | O4–H41...O2 | 0.84(1)                    | 1.61(1)                      | 2.451(6)                     | 175(8)                         | $x+1, y, z$        |
| <b>3</b> |             |                            |                              |                              |                                |                    |
|          | O4–H41...O2 | 0.84                       | 1.61                         | 2.43(1)                      | 163                            | $x-1, y, z$        |

## 2. IR spectroscopy

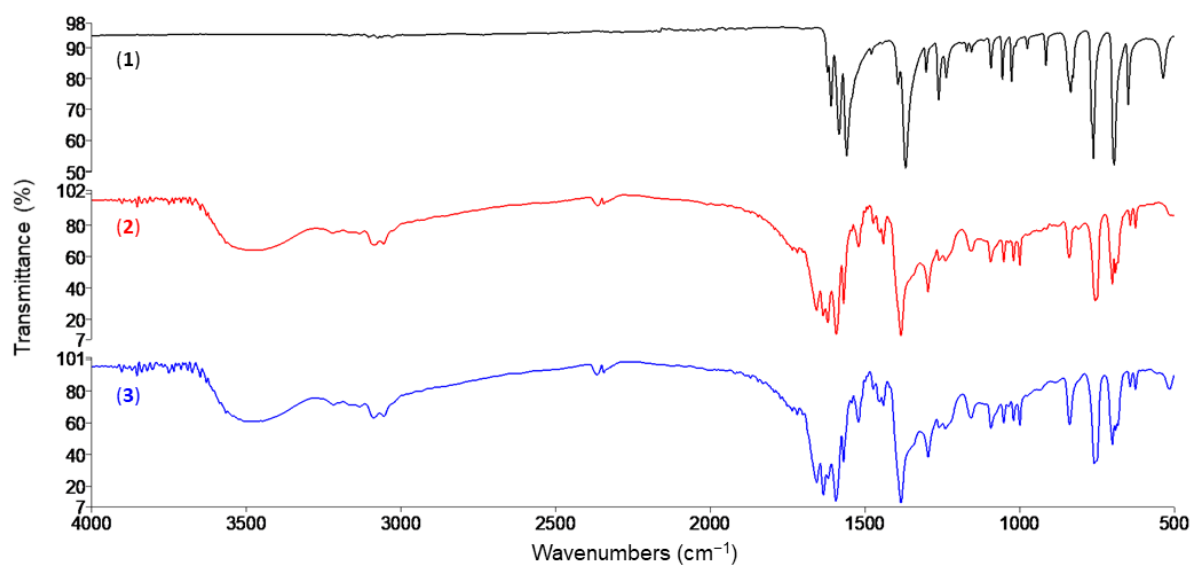

**Figure S1.** IR spectra of  $\{[\text{HgCl}(\text{pic})]\}_n$  (**1**),  $[\text{HgCl}(\text{pic})(\text{picH})]$  (**2**) and  $[\text{HgBr}(\text{pic})(\text{picH})]$  (**3**).

### 3. TG/DSC analysis

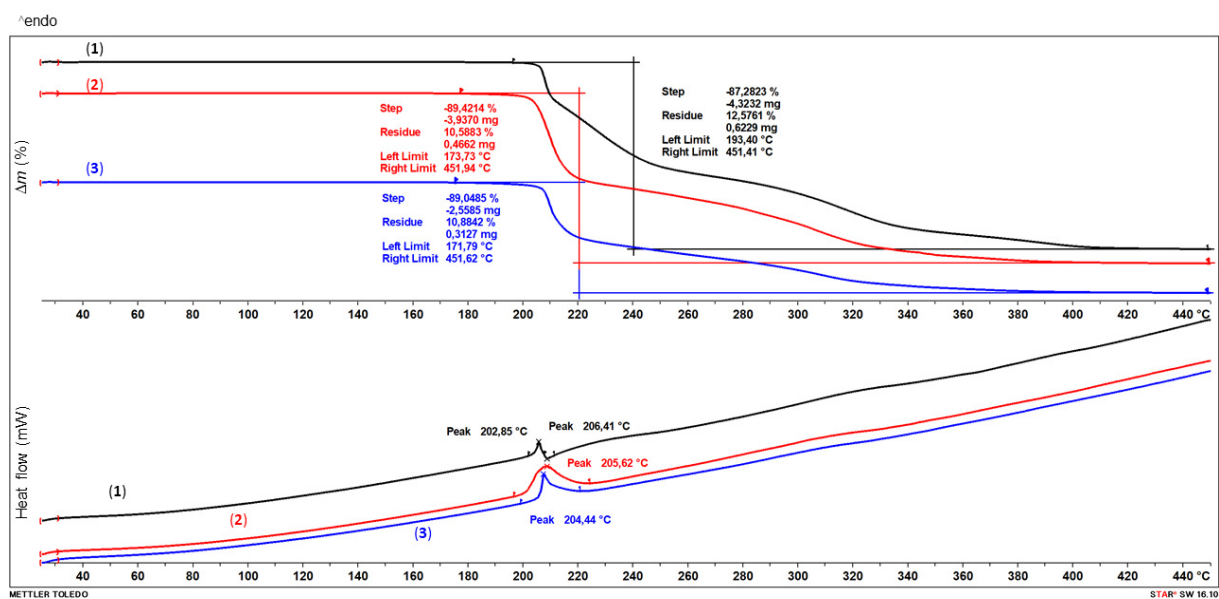

**Figure S2.** TGA/DSC curves of  $\{[\text{HgCl}(\text{pic})]\}_n$  (1),  $[\text{HgCl}(\text{pic})(\text{picH})]$  (2) and  $[\text{HgBr}(\text{pic})(\text{picH})]$  (3).
