# Supplementary material for: The Solvent Effect on Composition and Dimensionality of Mercury(II) Complexes with Picolinic Acid
Source: Molecules. 2021 Aug 18;26(16):5002. doi: 10.3390/molecules26165002 (PMC8400068; doi:10.3390/molecules26165002)
Supplement: Supplementary file 1 [file molecules-26-05002-s001.zip]

Archive with 8 entries (8 files):
- 1-checkcif.pdf
- 1.cif
- 2-checkcif.pdf
- 2.cif
- 3-checkcif.pdf
- 3.cif
- supplementary materials.docx
- supplementary materials.pdf
