# Supplementary material for: The Solvent Effect on Composition and Dimensionality of Mercury(II) Complexes with Picolinic Acid
Source: Molecules. 2021 Aug 18;26(16):5002. doi: 10.3390/molecules26165002 (PMC8400068; doi:10.3390/molecules26165002)
Supplement: Supplementary file 1 [file molecules-26-05002-s001.zip › 1.cif]

 
data_1
 
_audit_creation_method            'SHELXL-2018/3'
_shelx_SHELXL_version_number      '2018/3'
_chemical_name_systematic         ?
_chemical_name_common             ?
_chemical_melting_point           ?
_chemical_formula_moiety          ?
_chemical_formula_sum
 'C6 H4 Cl Hg N O2' 
_chemical_formula_weight          358.14

loop_
 _atom_type_symbol
 _atom_type_description
 _atom_type_scat_dispersion_real
 _atom_type_scat_dispersion_imag
 _atom_type_scat_source
 'C'  'C'   0.0033   0.0016
 'International Tables Vol C Tables 4.2.6.8 and 6.1.1.4'
 'H'  'H'   0.0000   0.0000
 'International Tables Vol C Tables 4.2.6.8 and 6.1.1.4'
 'Hg'  'Hg'  -2.3894   9.2266
 'International Tables Vol C Tables 4.2.6.8 and 6.1.1.4'
 'Cl'  'Cl'   0.1484   0.1585
 'International Tables Vol C Tables 4.2.6.8 and 6.1.1.4'
 'N'  'N'   0.0061   0.0033
 'International Tables Vol C Tables 4.2.6.8 and 6.1.1.4'
 'O'  'O'   0.0106   0.0060
 'International Tables Vol C Tables 4.2.6.8 and 6.1.1.4'
 
_space_group_crystal_system       monoclinic
_space_group_IT_number            14
_space_group_name_H-M_alt         'P 21/c'
_space_group_name_Hall            '-P 2ybc'
 
_shelx_space_group_comment
;
The symmetry employed for this shelxl refinement is uniquely defined
by the following loop, which should always be used as a source of
symmetry information in preference to the above space-group names.
They are only intended as comments.
;
 
loop_
 _space_group_symop_operation_xyz
 'x, y, z'
 '-x, y+1/2, -z+1/2'
 '-x, -y, -z'
 'x, -y-1/2, z-1/2'
 
_cell_length_a                    9.0131(6)
_cell_length_b                    8.8569(4)
_cell_length_c                    9.4804(6)
_cell_angle_alpha                 90
_cell_angle_beta                  113.292(7)
_cell_angle_gamma                 90
_cell_volume                      695.12(8)
_cell_formula_units_Z             4
_cell_measurement_temperature     170(2)
_cell_measurement_reflns_used     10009
_cell_measurement_theta_min       3.2330
_cell_measurement_theta_max       33.0750
 
_exptl_crystal_description        'prism'
_exptl_crystal_colour             'colorless'
_exptl_crystal_density_meas       ?
_exptl_crystal_density_method     ?
_exptl_crystal_density_diffrn     3.422          
_exptl_crystal_F_000              640
_exptl_transmission_factor_min    ?
_exptl_transmission_factor_max    ?
_exptl_crystal_size_max           ?
_exptl_crystal_size_mid           ?
_exptl_crystal_size_min           ?
_exptl_absorpt_coefficient_mu     22.462
_shelx_estimated_absorpt_T_min    ?
_shelx_estimated_absorpt_T_max    ?
_exptl_absorpt_correction_type    multi-scan
_exptl_absorpt_correction_T_min   0.34078
_exptl_absorpt_correction_T_max   1.00000
_exptl_absorpt_process_details    
;
CrysAlisPro 1.171.41.92a (Rigaku Oxford Diffraction, 2020)
Empirical absorption correction using spherical harmonics,
implemented in SCALE3 ABSPACK scaling algorithm.
;
_exptl_absorpt_special_details    ?
_diffrn_ambient_temperature       170(2)
_diffrn_radiation_wavelength      0.71073
_diffrn_radiation_type            MoK\a
_diffrn_source                    ?
_diffrn_measurement_device_type   'XtaLAB Synergy, Dualflex, HyPix'
_diffrn_measurement_method        '\w scans'
_diffrn_detector_area_resol_mean  ?
_diffrn_reflns_number             9218
_diffrn_reflns_av_unetI/netI      0.0471
_diffrn_reflns_av_R_equivalents   0.1029
_diffrn_reflns_limit_h_min        -10
_diffrn_reflns_limit_h_max        10
_diffrn_reflns_limit_k_min        -10
_diffrn_reflns_limit_k_max        10
_diffrn_reflns_limit_l_min        -11
_diffrn_reflns_limit_l_max        11
_diffrn_reflns_theta_min          3.281
_diffrn_reflns_theta_max          24.996
_diffrn_reflns_theta_full         24.996
_diffrn_measured_fraction_theta_max   0.998
_diffrn_measured_fraction_theta_full  0.998
_diffrn_reflns_Laue_measured_fraction_max    0.998
_diffrn_reflns_Laue_measured_fraction_full   0.998
_diffrn_reflns_point_group_measured_fraction_max   0.998
_diffrn_reflns_point_group_measured_fraction_full  0.998
_reflns_number_total              1219
_reflns_number_gt                 1155
_reflns_threshold_expression      'I > 2\s(I)'
_reflns_Friedel_coverage          0.000
_reflns_Friedel_fraction_max      .
_reflns_Friedel_fraction_full     .
 
_reflns_special_details
;
 Reflections were merged by SHELXL according to the crystal
 class for the calculation of statistics and refinement.
 
 _reflns_Friedel_fraction is defined as the number of unique
 Friedel pairs measured divided by the number that would be
 possible theoretically, ignoring centric projections and
 systematic absences.
;
 
_computing_data_collection        'CrysAlisPro 1.171.41.92a (Rigaku OD, 2020)'
_computing_cell_refinement        'CrysAlisPro 1.171.41.92a (Rigaku OD, 2020)'
_computing_data_reduction         'CrysAlisPro 1.171.41.92a (Rigaku OD, 2020)'
_computing_structure_solution     'SHELXT (Sheldrick, 2015)'
_computing_structure_refinement 'SHELXL-2018/3 (Sheldrick, 2018)'
_computing_molecular_graphics     'MERCURY, Version 2020.2.0 (Macrae et al., 2020)'
_computing_publication_material   'SHELXL-2018/3 (Sheldrick, 2018)'
_refine_special_details           ?
_refine_ls_structure_factor_coef  Fsqd
_refine_ls_matrix_type            full
_refine_ls_weighting_scheme       calc
_refine_ls_weighting_details
'w=1/[\s^2^(Fo^2^)+(0.0251P)^2^+1.1571P] where P=(Fo^2^+2Fc^2^)/3'
_atom_sites_solution_primary      ?
_atom_sites_solution_secondary    ?
_atom_sites_solution_hydrogens    geom
_refine_ls_hydrogen_treatment     constr
_refine_ls_extinction_method      none
_refine_ls_extinction_coef        .
_refine_ls_number_reflns          1219
_refine_ls_number_parameters      100
_refine_ls_number_restraints      0
_refine_ls_R_factor_all           0.0279
_refine_ls_R_factor_gt            0.0265
_refine_ls_wR_factor_ref          0.0652
_refine_ls_wR_factor_gt           0.0643
_refine_ls_goodness_of_fit_ref    1.089
_refine_ls_restrained_S_all       1.089
_refine_ls_shift/su_max           0.001
_refine_ls_shift/su_mean          0.000
 
loop_
 _atom_site_label
 _atom_site_type_symbol
 _atom_site_fract_x
 _atom_site_fract_y
 _atom_site_fract_z
 _atom_site_U_iso_or_equiv
 _atom_site_adp_type
 _atom_site_occupancy
 _atom_site_site_symmetry_order  
 _atom_site_calc_flag
 _atom_site_refinement_flags_posn
 _atom_site_refinement_flags_adp
 _atom_site_refinement_flags_occupancy
 _atom_site_disorder_assembly
 _atom_site_disorder_group
Hg1 Hg 0.49195(3) 0.56420(2) 0.80792(2) 0.02245(14) Uani 1 1 d . . . . .
Cl1 Cl 0.73421(17) 0.51027(15) 1.01461(16) 0.0204(3) Uani 1 1 d . . . . .
N1 N 0.2918(6) 0.4781(5) 0.6047(5) 0.0178(11) Uani 1 1 d . . . . .
O1 O 0.5004(5) 0.6939(4) 0.5877(4) 0.0202(9) Uani 1 1 d . . . . .
O2 O 0.3629(5) 0.7102(4) 0.3337(4) 0.0223(9) Uani 1 1 d . . . . .
C1 C 0.2687(7) 0.5354(6) 0.4677(7) 0.0159(12) Uani 1 1 d . . . . .
C2 C 0.1456(7) 0.4871(6) 0.3342(7) 0.0212(13) Uani 1 1 d . . . . .
H2 H 0.132614 0.529252 0.237944 0.025 Uiso 1 1 calc R U . . .
C3 C 0.0407(7) 0.3757(6) 0.3430(7) 0.0200(12) Uani 1 1 d . . . . .
H3 H -0.046517 0.342010 0.253130 0.024 Uiso 1 1 calc R U . . .
C4 C 0.0657(7) 0.3152(5) 0.4843(7) 0.0185(12) Uani 1 1 d . . . . .
H4 H -0.003516 0.238093 0.493080 0.022 Uiso 1 1 calc R U . . .
C5 C 0.1931(7) 0.3678(5) 0.6143(6) 0.0155(12) Uani 1 1 d . . . . .
H5 H 0.210892 0.325262 0.711682 0.019 Uiso 1 1 calc R U . . .
C6 C 0.3879(7) 0.6577(6) 0.4636(7) 0.0180(12) Uani 1 1 d . . . . .
 
loop_
 _atom_site_aniso_label
 _atom_site_aniso_U_11
 _atom_site_aniso_U_22
 _atom_site_aniso_U_33
 _atom_site_aniso_U_23
 _atom_site_aniso_U_13
 _atom_site_aniso_U_12
Hg1 0.0182(2) 0.03358(19) 0.0136(2) 0.00431(8) 0.00416(14) -0.00191(8)
Cl1 0.0200(8) 0.0209(7) 0.0165(7) 0.0023(5) 0.0031(6) -0.0021(6)
N1 0.023(3) 0.016(2) 0.018(3) 0.001(2) 0.012(2) 0.007(2)
O1 0.019(2) 0.0229(19) 0.020(2) 0.0051(16) 0.0092(19) 0.0006(16)
O2 0.034(3) 0.0218(19) 0.015(2) 0.0063(16) 0.0140(19) 0.0028(18)
C1 0.014(3) 0.019(2) 0.020(3) 0.001(2) 0.012(3) 0.004(2)
C2 0.026(4) 0.021(3) 0.017(3) 0.002(2) 0.008(3) 0.011(3)
C3 0.017(3) 0.020(3) 0.017(3) -0.004(2) 0.001(3) 0.003(2)
C4 0.015(3) 0.014(2) 0.025(3) -0.001(2) 0.008(3) 0.003(2)
C5 0.018(3) 0.013(2) 0.019(3) 0.000(2) 0.011(3) 0.002(2)
C6 0.024(4) 0.013(2) 0.020(3) 0.001(2) 0.011(3) 0.009(2)
 
_geom_special_details
;
 All esds (except the esd in the dihedral angle between two l.s. planes)
 are estimated using the full covariance matrix.  The cell esds are taken
 into account individually in the estimation of esds in distances, angles
 and torsion angles; correlations between esds in cell parameters are only
 used when they are defined by crystal symmetry.  An approximate (isotropic)
 treatment of cell esds is used for estimating esds involving l.s. planes.
;
 
loop_
 _geom_bond_atom_site_label_1
 _geom_bond_atom_site_label_2
 _geom_bond_distance
 _geom_bond_site_symmetry_2
 _geom_bond_publ_flag
Hg1 N1 2.191(5) . ?
Hg1 Cl1 2.3349(15) . ?
Hg1 O2 2.373(4) 4_576 ?
Hg1 O1 2.411(4) . ?
N1 C1 1.332(7) . ?
N1 C5 1.348(7) . ?
O1 C6 1.254(7) . ?
O2 C6 1.251(7) . ?
C1 C2 1.381(9) . ?
C1 C6 1.537(8) . ?
C2 C3 1.391(9) . ?
C2 H2 0.9500 . ?
C3 C4 1.377(8) . ?
C3 H3 0.9500 . ?
C4 C5 1.391(8) . ?
C4 H4 0.9500 . ?
C5 H5 0.9500 . ?
 
loop_
 _geom_angle_atom_site_label_1
 _geom_angle_atom_site_label_2
 _geom_angle_atom_site_label_3
 _geom_angle
 _geom_angle_site_symmetry_1
 _geom_angle_site_symmetry_3
 _geom_angle_publ_flag
N1 Hg1 Cl1 146.97(12) . . ?
N1 Hg1 O2 96.72(15) . 4_576 ?
Cl1 Hg1 O2 114.82(11) . 4_576 ?
N1 Hg1 O1 72.62(16) . . ?
Cl1 Hg1 O1 119.02(11) . . ?
O2 Hg1 O1 82.67(13) 4_576 . ?
C1 N1 C5 119.3(5) . . ?
C1 N1 Hg1 118.8(4) . . ?
C5 N1 Hg1 121.9(4) . . ?
C6 O1 Hg1 113.6(3) . . ?
C6 O2 Hg1 120.7(4) . 4_575 ?
N1 C1 C2 122.3(5) . . ?
N1 C1 C6 116.9(5) . . ?
C2 C1 C6 120.8(5) . . ?
C1 C2 C3 119.0(5) . . ?
C1 C2 H2 120.5 . . ?
C3 C2 H2 120.5 . . ?
C4 C3 C2 118.7(6) . . ?
C4 C3 H3 120.6 . . ?
C2 C3 H3 120.6 . . ?
C3 C4 C5 119.5(5) . . ?
C3 C4 H4 120.3 . . ?
C5 C4 H4 120.3 . . ?
N1 C5 C4 121.2(5) . . ?
N1 C5 H5 119.4 . . ?
C4 C5 H5 119.4 . . ?
O2 C6 O1 126.3(5) . . ?
O2 C6 C1 115.6(5) . . ?
O1 C6 C1 118.1(5) . . ?
 
loop_
 _geom_torsion_atom_site_label_1
 _geom_torsion_atom_site_label_2
 _geom_torsion_atom_site_label_3
 _geom_torsion_atom_site_label_4
 _geom_torsion
 _geom_torsion_site_symmetry_1
 _geom_torsion_site_symmetry_2
 _geom_torsion_site_symmetry_3
 _geom_torsion_site_symmetry_4
 _geom_torsion_publ_flag
C5 N1 C1 C2 0.7(8) . . . . ?
Hg1 N1 C1 C2 179.9(4) . . . . ?
C5 N1 C1 C6 -178.4(5) . . . . ?
Hg1 N1 C1 C6 0.8(6) . . . . ?
N1 C1 C2 C3 0.7(8) . . . . ?
C6 C1 C2 C3 179.7(5) . . . . ?
C1 C2 C3 C4 -1.4(8) . . . . ?
C2 C3 C4 C5 0.8(8) . . . . ?
C1 N1 C5 C4 -1.4(8) . . . . ?
Hg1 N1 C5 C4 179.5(4) . . . . ?
C3 C4 C5 N1 0.6(8) . . . . ?
Hg1 O2 C6 O1 -15.2(8) 4_575 . . . ?
Hg1 O2 C6 C1 165.8(3) 4_575 . . . ?
Hg1 O1 C6 O2 178.5(4) . . . . ?
Hg1 O1 C6 C1 -2.4(6) . . . . ?
N1 C1 C6 O2 -179.6(5) . . . . ?
C2 C1 C6 O2 1.3(8) . . . . ?
N1 C1 C6 O1 1.3(7) . . . . ?
C2 C1 C6 O1 -177.8(5) . . . . ?
 
_refine_diff_density_max    1.313
_refine_diff_density_min   -1.240
_refine_diff_density_rms    0.232

_shelx_res_file
;
TITL shelxt_a.res in P2(1)/c
    shelx.res
    created by SHELXL-2018/3 at 21:27:00 on 15-Jun-2021
CELL  0.71073   9.0131   8.8569   9.4804   90.000  113.292   90.000
ZERR     4.00   0.0006   0.0004   0.0006    0.000    0.007    0.000
LATT   1
SYMM  - X, 1/2 + Y, 1/2 - Z
SFAC  C    H    HG   CL   N    O
UNIT  24 16 4 4 4 8
MERG   2
OMIT    -1  50
OMIT 2   0   0
OMIT 0   2   0
ACTA
TEMP -103
FMAP   2
PLAN   20
BOND $H
HTAB
CONF
LIST   6
L.S.  10
WGHT    0.025100    1.157100
FVAR       0.48174
HG1   3    0.491953    0.564201    0.807923    11.00000    0.01823    0.03358 =
         0.01355    0.00431    0.00416   -0.00191
CL1   4    0.734209    0.510269    1.014609    11.00000    0.02003    0.02090 =
         0.01651    0.00229    0.00310   -0.00213
N1    5    0.291831    0.478078    0.604714    11.00000    0.02256    0.01596 =
         0.01840    0.00078    0.01176    0.00724
O1    6    0.500382    0.693941    0.587665    11.00000    0.01854    0.02295 =
         0.02049    0.00513    0.00919    0.00057
O2    6    0.362893    0.710205    0.333703    11.00000    0.03380    0.02178 =
         0.01532    0.00633    0.01405    0.00280
C1    1    0.268709    0.535362    0.467745    11.00000    0.01389    0.01869 =
         0.01992    0.00141    0.01184    0.00423
C2    1    0.145550    0.487080    0.334248    11.00000    0.02560    0.02071 =
         0.01713    0.00205    0.00834    0.01111
AFIX  43
H2    2    0.132614    0.529252    0.237944    11.00000   -1.20000
AFIX   0
C3    1    0.040660    0.375669    0.342977    11.00000    0.01667    0.02049 =
         0.01729   -0.00445    0.00087    0.00338
AFIX  43
H3    2   -0.046517    0.342010    0.253130    11.00000   -1.20000
AFIX   0
C4    1    0.065673    0.315163    0.484349    11.00000    0.01549    0.01394 =
         0.02550   -0.00137    0.00757    0.00303
AFIX  43
H4    2   -0.003516    0.238093    0.493080    11.00000   -1.20000
AFIX   0
C5    1    0.193105    0.367807    0.614329    11.00000    0.01833    0.01315 =
         0.01889   -0.00028    0.01150    0.00245
AFIX  43
H5    2    0.210892    0.325262    0.711682    11.00000   -1.20000
AFIX   0
C6    1    0.387872    0.657683    0.463577    11.00000    0.02388    0.01311 =
         0.01954    0.00096    0.01123    0.00944
HKLF    4


REM  shelxt_a.res in P2(1)/c
REM wR2 = 0.0652, GooF = S = 1.089, Restrained GooF = 1.089 for all data
REM R1 = 0.0265 for 1155 Fo > 4sig(Fo) and 0.0279 for all 1219 data
REM 100 parameters refined using 0 restraints

END

WGHT      0.0250      1.1963

REM Instructions for potential hydrogen bonds
EQIV $3 -x+1, -y+1, -z+2
HTAB C5 Cl1_$3

REM Highest difference peak  1.313,  deepest hole -1.240,  1-sigma level  0.232
Q1    1   0.3881  0.5641  0.9027  11.00000  0.05    1.31
Q2    1   0.5914  0.5647  0.7077  11.00000  0.05    1.08
Q3    1   0.3701  0.5704  0.7995  11.00000  0.05    0.98
Q4    1   0.4756  0.4476  0.9740  11.00000  0.05    0.95
Q5    1   0.4983  0.4785  0.9139  11.00000  0.05    0.86
Q6    1   0.6217  0.4779  0.9763  11.00000  0.05    0.83
Q7    1   0.5195  0.5752  0.9154  11.00000  0.05    0.82
Q8    1   0.6523  0.6760  0.8022  11.00000  0.05    0.79
Q9    1   0.3375  0.8231  0.3387  11.00000  0.05    0.74
Q10   1   0.3749  0.4738  0.6680  11.00000  0.05    0.70
Q11   1   0.6239  0.5748  0.8146  11.00000  0.05    0.70
Q12   1   0.4561  0.5695  0.7037  11.00000  0.05    0.69
Q13   1   0.6625  0.7020  0.6421  11.00000  0.05    0.68
Q14   1   0.3390  0.8688  0.4005  11.00000  0.05    0.68
Q15   1   0.3641  0.6609  0.6754  11.00000  0.05    0.67
Q16   1   0.4661  0.6276  0.6255  11.00000  0.05    0.67
Q17   1   0.3635  0.3534  0.5385  11.00000  0.05    0.63
Q18   1   0.8957  0.5814  1.1029  11.00000  0.05    0.63
Q19   1   0.3521  0.4568  0.8406  11.00000  0.05    0.62
Q20   1   0.5000  0.5000  0.5000  10.50000  0.05    0.62
;
_shelx_res_checksum     258

_shelx_hkl_file
;
   0   0  -2 3311.53 315.036  15
   0   0   2 3313.41 316.343   3
   0   0  -3 2.32914 3.04027  15
   0   0   3 0.53713 3.07204  15
   0   0   3 2.66599 3.23892  12
   0   0   3 3.88140 3.81120   3
   0   0  -4 365.107 35.6768   1
   0   0  -4 313.169 36.4126   9
   0   0  -4 340.683 35.3491  15
   0   0   4 312.015 34.5593  15
   0   0   4 389.313 36.3198  12
   0   0   4 259.437 36.6515   3
   0   0   5 1.73675 7.01596   3
   0   0  -5 5.26589 5.93449   1
   0   0  -5 1.44217 5.98733   9
   0   0   5 1.10556 5.95662  12
   0   0  -5 6.25498 5.52937  15
   0   0   5 1.77071 5.06166  15
   0   0  -6 5107.36 491.245   1
   0   0  -6 5644.65 494.498   9
   0   0   6 4688.33 494.424   3
   0   0  -6 5023.33 492.454  12
   0   0   6 4578.92 489.464  15
   0   0  -6 6091.14 492.451  15
   0   0  -7-1.57962 9.14171  15
   0   0  -7 17.1996 11.9272   9
   0   0   7-5.14881 10.3917   3
   0   0  -7-1.91957 8.36924  12
   0   0   8 3177.09 376.923   3
   0   0  -8 4055.64 377.758   9
   0   0  -8 4258.74 374.748  15
   0   0  -9 6.94609 19.5514  13
   0   0   9 6.87782 14.6358   3
   0   0  -9-2.93217 13.3831   9
   0   0  10 2327.31 309.012   3
   0   0 -10 3203.56 311.315   9
   0   0  11 8.78698 20.4845   3
   0   0 -11 3.79285 18.7579   9
   0   0 -11 4.38950 25.4084  13
   0   0 -12 34.1637 28.6609  13
   0   0 -12 85.2237 28.5064   9
   0   0  12 38.8317 24.9166   3
   0   0 -13-4.72461 22.9249   9
   0   1  -1 745.259 79.6177   1
   0  -1   1 904.251 79.7235   9
   0  -1   1 721.115 80.8868   4
   0   1   1 784.287 79.8130   4
   0  -1  -1 843.352 79.3156   3
   0  -1   1 851.358 79.4142   3
   0  -1   1 826.828 79.2396  15
   0  -1  -1 850.311 79.7222  12
   0  -1   2 1680.18 154.007   9
   0   1  -2 1321.45 154.823   4
   0  -1   2 1525.89 155.357   4
   0  -1   2 1618.30 154.524   3
   0  -1  -2 1853.26 154.975   3
   0  -1   2 1578.90 153.640  15
   0   1   2 1555.60 152.971  15
   0  -1  -2 1562.64 154.228  12
   0  -1   2 1709.80 153.816  12
   0   1  -3 4692.03 447.949   9
   0  -1   3 5208.69 448.166   9
   0  -1   3 4017.49 447.923   4
   0   1  -3 4922.69 448.577   4
   0  -1   3 4210.80 448.287   3
   0  -1  -3 5477.28 449.448   3
   0  -1   3 4987.60 447.573  12
   0  -1  -3 4517.32 447.990  12
   0   1  -3 4906.93 447.559  15
   0   1   3 4502.13 446.386  15
   0  -1  -3 4582.87 446.663  15
   0  -1   4 2221.21 259.376  15
   0   1  -4 2840.17 260.777  15
   0   1   4 2766.83 259.283  15
   0  -1  -4 2706.47 259.776  15
   0  -1  -4 3527.40 264.275   3
   0  -1   4 2687.32 262.815   3
   0   1  -4 2783.37 261.371   9
   0  -1  -4 2499.76 261.174  12
   0  -1   4 2866.00 260.608  12
   0   1  -4 2695.58 260.829   1
   0  -1   5 9934.39 1059.94  15
   0   1  -5 12584.3 1062.06  15
   0   1   5 10252.9 1059.35  15
   0  -1  -5 11510.6 1060.57  15
   0  -1  -5 12286.8 1064.06   3
   0  -1   5 11095.0 1064.08   3
   0   1  -5 11276.6 1062.42   9
   0  -1   5 12189.1 1061.43  12
   0   1  -5 10729.8 1061.20   1
   0  -1   6 767.476 90.6325   3
   0  -1  -6 895.189 91.6264   9
   0   1  -6 939.053 90.3568   9
   0   1  -6 1023.12 89.3249  15
   0   1   6 763.263 85.6687  15
   0  -1   7 1230.47 147.107   3
   0  -1  -7 1342.52 146.819   9
   0   1  -7 1574.78 147.078   9
   0   1  -7 1589.08 145.453  15
   0   1  -8-4.80426 11.6540   9
   0  -1  -8-2.67797 10.5057   9
   0  -1   8 3.01835 10.7455   3
   0   1  -8 12.0416 11.6152  15
   0   1  -9 9.23552 14.4086  15
   0  -1   9 3.43438 14.9774   3
   0   1  -9 8.45944 13.9443   9
   0  -1  -9 9.38864 15.1860   9
   0  -1  -9-8.24942 12.8211  12
   0  -1  -9 3.37561 18.4524  13
   0  -1 -10 132.964 31.4450  13
   0   1 -10 79.5071 22.8230  15
   0   1 -10 74.6034 22.8457   9
   0  -1 -10 95.9118 26.0712   9
   0  -1  10 97.4225 26.8400   3
   0  -1  11 1114.66 164.049   3
   0  -1 -11 1506.68 166.676   9
   0   1 -11 1712.34 167.637   9
   0  -1  12 204.501 47.4986   3
   0   1 -12 365.516 51.7930   9
   0  -1 -12 291.145 49.7785   9
   0  -1 -12 441.082 59.7346  13
   0   1 -13 1081.10 126.050   9
   0  -2   0 12329.0 1025.10  11
   0   2   0 10312.5 1026.98   4
   0  -2   0 10628.6 1023.07   6
   0  -2   0 9836.26 1023.77  14
   0  -2   0 11956.7 1027.38   8
   0  -2  -1 8618.48 754.366  11
   0   2   1 8093.04 753.433  11
   0  -2   1 6772.43 755.975   4
   0   2   1 6179.73 754.111   4
   0  -2   1 8063.23 753.946   9
   0  -2   1 8332.62 751.865   3
   0   2   1 7955.45 751.797   3
   0   2  -1 8218.06 751.780   3
   0  -2  -1 8293.00 751.690   3
   0  -2  -1 7033.53 753.005  12
   0  -2   1 8226.04 754.905   7
   0   2  -2 2113.98 197.185   9
   0  -2   2 2165.80 196.818   9
   0  -2   2 1866.90 195.820  15
   0  -2   2 2156.56 196.382   3
   0   2   2 1847.32 195.985   3
   0   2  -2 2354.83 196.677   3
   0  -2  -2 2315.69 196.437   3
   0  -2  -2 1904.44 196.647  12
   0  -2   2 1977.02 200.107   4
   0   2   2 1886.38 196.687   4
   0  -2  -2 2206.03 198.220   4
   0   2  -2 1659.82 198.866   4
   0  -2   3 1853.71 180.657   9
   0   2  -3 1983.28 181.632   9
   0   2   3 1674.74 179.030  15
   0  -2   3 1672.45 179.904  15
   0  -2  -3 2065.20 181.668   3
   0   2   3 1803.22 181.452   3
   0  -2   3 1970.44 181.791   3
   0   2  -3 2214.65 182.279   3
   0  -2  -3 1683.88 181.097  12
   0   2  -3 1648.53 183.302   4
   0  -2  -3 2293.97 181.194   4
   0  -2   3 1840.41 184.029   4
   0   2  -4 604.845 63.9275   9
   0  -2   4 668.324 63.7508   9
   0   2   4 553.537 61.3821  15
   0  -2   4 583.508 64.7574   3
   0  -2  -4 744.776 65.6956   3
   0   2  -4 734.436 66.3250   3
   0   2   4 553.187 64.4304   3
   0  -2   4 668.143 63.5136  12
   0  -2  -4 629.443 64.7183  12
   0   2  -4 548.228 64.8177   4
   0  -2   4 627.339 66.2874   4
   0   2  -5 508.106 55.9619   9
   0   2  -5 627.466 56.9351  15
   0   2   5 450.308 52.7541  15
   0   2   5 473.209 56.9231   3
   0  -2  -5 630.612 58.3067   3
   0  -2   5 430.328 56.5727   3
   0   2  -5 672.579 59.4918   3
   0   2  -5 581.882 56.8120   1
   0  -2   5 508.266 54.7999  12
   0  -2  -5 500.558 56.4337  12
   0   2   6 1715.44 181.225   3
   0  -2   6 1702.20 181.221   3
   0   2  -6 1909.39 180.152   9
   0  -2  -6 1719.88 179.910  12
   0   2   6 1741.10 175.757  15
   0   2  -6 2134.35 180.328  15
   0   2  -7 2445.94 215.301  15
   0   2   7 1843.04 215.885   3
   0  -2   7 1980.80 216.736   3
   0   2  -7 2376.41 215.971   9
   0  -2  -8 1345.78 153.629   9
   0   2  -8 1555.03 152.711   9
   0   2  -8 1674.30 152.658  15
   0  -2   8 1254.47 153.226   3
   0   2   8 1286.33 153.118   3
   0  -2  -8 1922.58 158.410  13
   0  -2  -9 2318.87 237.697   9
   0   2  -9 2360.48 235.449   9
   0   2  -9 2769.63 236.227  15
   0  -2   9 1709.55 234.196   3
   0   2   9 1657.13 233.393   3
   0  -2  -9 3238.97 243.733  13
   0   2  -9 3357.15 246.204  13
   0  -2 -10 1514.98 175.942   9
   0   2 -10 1760.18 176.081   9
   0   2 -10 2212.98 184.903  13
   0  -2 -10 2230.78 183.337  13
   0   2 -10 1983.17 176.159  15
   0  -2  10 1326.96 174.679   3
   0   2  10 1266.06 173.772   3
   0  -2  11 267.640 47.0696   3
   0   2  11 214.880 44.9632   3
   0   2 -11 251.423 44.2750   9
   0  -2 -11 245.809 45.2915   9
   0  -2 -11 359.780 51.9651  13
   0   2 -11 305.805 45.8320  15
   0  -2  12 77.6804 29.7982   3
   0   2  12 75.6313 29.7873   3
   0  -2 -12 93.1620 32.2683   9
   0   2 -12 132.851 32.8846   9
   0  -2 -12 151.305 39.0598  13
   0   2 -12 145.304 42.7267  13
   0   2 -13 9.23664 24.0826   9
   0  -3   0 1.92148 4.49772  11
   0   3   0 2.03340 4.34634  11
   0   3   0 12.2443 7.99239   4
   0  -3   0 2.65086 2.74875   6
   0  -3   0 6.50908 7.75251   8
   0  -3   0 4.48512 3.78678  14
   0   3   0 10.6720 4.30173  14
   0  -3  -1 3047.03 295.919  13
   0   3   1 3448.18 298.764  14
   0  -3   1 2843.47 298.047  14
   0   3  -1 2867.25 296.046  13
   0  -3  -1 3035.25 299.123  12
   0  -3   1 3644.34 300.886  11
   0  -3  -1 3476.71 300.458  11
   0   3   1 3085.49 299.175  11
   0   3   1 2621.17 301.186   4
   0  -3  -1 3123.69 303.423   4
   0  -3  -1 3245.84 296.182   3
   0   3  -1 3029.79 296.207   3
   0  -3   1 3331.96 296.466   3
   0   3   1 3232.26 296.462   3
   0   3   1 2633.00 304.039   8
   0  -3   1 3374.69 301.005   8
   0   3  -1 3204.68 298.726  15
   0   3   1 3105.09 298.293   6
   0  -3   1 2905.40 302.147   7
   0   3   2 6230.59 552.221  11
   0  -3  -2 5665.80 554.890   4
   0   3  -2 4418.69 554.992   4
   0   3   2 5070.72 552.629   4
   0  -3   2 5899.40 557.627   4
   0   3  -2 5845.68 550.090   3
   0  -3   2 6265.00 550.478   3
   0   3   2 5668.83 550.251   3
   0  -3  -2 6238.25 550.014   3
   0  -3   2 6336.13 552.862   9
   0  -3   2 5926.73 553.348   7
   0  -3  -2 5050.94 551.315  12
   0  -3   3 236.420 27.1433   9
   0   3  -3 208.643 27.2637   9
   0  -3  -3 218.828 27.2272  12
   0   3   3 263.044 27.9134  12
   0   3   3 193.854 26.1715   3
   0  -3   3 239.833 26.8652   3
   0  -3  -3 251.850 26.6517   3
   0   3  -3 217.597 26.4196   3
   0  -3  -3 265.649 29.3789   4
   0   3  -3 231.073 31.3722   4
   0  -3   3 231.497 31.6246   4
   0   3   3 249.136 27.3310   4
   0  -3   4 6799.67 567.503   9
   0   3  -4 6005.51 568.118   9
   0  -3   4 6039.27 566.523  12
   0  -3  -4 5243.22 567.476  12
   0   3  -4 6923.36 568.387   3
   0   3   4 6332.55 568.210   3
   0  -3  -4 7461.18 568.414   3
   0  -3   4 6049.57 567.905   3
   0  -3   4 5141.06 565.500  15
   0   3   4 5276.72 564.036  15
   0  -3   4 6730.44 573.718   4
   0   3  -4 4824.04 569.090   4
   0   3  -5 2065.88 211.583   4
   0  -3   5 2291.23 213.533   4
   0   3  -5 2159.82 210.614   9
   0  -3   5 2489.43 209.723   9
   0  -3   5 2048.60 209.468   1
   0   3   5 1991.64 210.445   3
   0   3  -5 1916.62 209.396   3
   0  -3  -5 2665.28 211.646   3
   0  -3   5 2129.82 210.739   3
   0  -3  -5 1986.85 210.302  12
   0  -3   5 2428.83 209.131  12
   0   3  -5 2174.42 209.830  15
   0   3   5 1885.52 205.657  15
   0   3   6 3642.74 351.182   3
   0  -3   6 3653.61 351.230   3
   0  -3  -6 3422.81 350.032  12
   0   3  -6 4008.20 350.938   9
   0  -3   6 3913.44 349.033   9
   0   3   6 3105.14 344.362  15
   0   3  -6 4284.93 350.957  15
   0   3  -7 46.0823 15.7335   9
   0  -3   7 58.5434 16.9156   3
   0   3   7 85.8063 17.9506   3
   0  -3  -7 75.9732 17.5337  12
   0   3   7 41.3243 10.9701  15
   0   3  -8 439.928 53.8583  13
   0  -3  -8 462.793 53.1955  13
   0   3  -8 451.239 50.6815   9
   0   3   8 288.716 47.9752   3
   0  -3   8 344.106 49.8137   3
   0  -3  -8 379.320 50.2108  12
   0   3  -8 466.995 51.2560  15
   0   3  -9 58.9844 20.6089  15
   0  -3  -9 51.9502 20.3382   9
   0   3  -9 46.7304 18.2037   9
   0   3   9 30.0009 18.0721   3
   0  -3   9 3.38496 16.5555   3
   0  -3  -9 75.2995 20.8228  12
   0   3  -9 79.9557 25.6945  13
   0  -3  -9 62.0912 23.9409  13
   0  -3 -10 507.235 65.3978   9
   0   3 -10 504.778 62.3407   9
   0   3  10 351.011 60.5959   3
   0  -3  10 328.108 60.7522   3
   0   3 -10 643.044 69.6615  13
   0  -3 -10 671.253 68.6074  13
   0   3 -10 533.964 63.0091  15
   0   3  11 92.6746 34.0878   3
   0  -3  11 143.258 36.0289   3
   0   3 -11 211.812 38.1638   9
   0  -3 -11 204.828 40.2127   9
   0  -3 -11 245.875 43.1977  13
   0   3 -11 238.815 41.4717  15
   0  -3 -12 1450.60 166.163   9
   0   3 -12 1571.95 165.249   9
   0   3 -12 1642.74 164.176  15
   0  -3  12 1140.26 162.230   3
   0   3  12 1139.53 160.797   3
   0  -3 -12 2163.03 173.714  13
   0   3 -12 2018.43 175.760  13
   0   3 -13 70.1582 29.9250   9
   0  -4   0 523.675 50.0010  11
   0   4   0 396.817 52.4441   4
   0   4   0 569.001 48.6336  14
   0  -4   0 381.723 47.3094  14
   0  -4   0 510.963 54.7360   8
   0   4   0 442.058 52.3191   8
   0  -4   0 424.831 46.5646   6
   0   4  -1 10828.8 932.219  15
   0   4   1 9063.34 938.474   8
   0  -4   1 10335.3 935.494   8
   0   4   1 10544.5 928.448   3
   0  -4   1 9913.69 928.200   3
   0  -4   1 8937.07 931.072  14
   0   4   1 10689.5 931.739  14
   0   4  -1 9165.34 927.706  13
   0  -4  -1 8867.33 931.972  12
   0   4   1 9352.96 932.737  11
   0  -4  -1 11273.2 934.345  11
   0  -4   1 10832.0 934.105  11
   0   4   1 9711.13 927.571  10
   0  -4   1 9977.30 927.472  10
   0   4   1 8186.88 935.066   4
   0  -4  -1 11239.1 939.943   4
   0   4  -1 8480.83 937.007   4
   0   4   1 9667.18 929.721   6
   0  -4   2 305.490 40.3382  14
   0   4   2 454.658 42.8439  14
   0  -4  -2 387.463 38.9510  13
   0   4  -2 347.762 38.9563  13
   0  -4  -2 368.373 42.1514  12
   0   4   2 365.003 41.7460  11
   0  -4  -2 370.699 46.5613   4
   0   4   2 373.757 44.4824   4
   0  -4   2 486.139 51.0754   4
   0  -4   2 444.655 44.2544   9
   0   4  -2 369.271 39.2423   3
   0  -4   2 345.147 39.2848   3
   0   4   2 378.334 39.7473   3
   0  -4  -2 412.702 39.4083   3
   0  -4   2 411.293 43.7000   8
   0  -4   2 441.265 46.0945   7
   0   4   2 508.809 45.9460   6
   0   4  -2 424.160 42.5443  15
   0   4   3 3291.52 326.253  11
   0  -4   3 3204.59 333.194   4
   0   4   3 2745.44 326.100   4
   0   4  -3 3154.00 331.712   4
   0  -4  -3 3611.69 330.952   4
   0  -4   3 3847.27 327.866   9
   0  -4  -3 3632.10 324.631   3
   0   4  -3 3472.34 324.669   3
   0  -4   3 3314.29 324.862   3
   0   4   3 3427.02 325.237   3
   0  -4  -3 3051.08 326.394  12
   0  -4   3 3948.97 329.524   7
   0   4   4 171.501 26.9018  11
   0   4  -4 237.893 32.8840   4
   0  -4   4 289.982 35.9916   4
   0  -4   4 280.710 28.6463   9
   0   4  -4 203.525 28.1807   9
   0  -4  -4 262.755 27.3420   3
   0   4   4 177.339 26.3883   3
   0  -4   4 228.834 27.5397   3
   0   4  -4 197.332 26.3607   3
   0  -4   4 254.265 29.5754   7
   0   4   4 307.492 30.2052  12
   0  -4  -4 216.414 28.1160  12
   0   4   4 184.194 23.9773  15
   0  -4   5 1010.55 105.088   4
   0   4  -5 815.133 101.223   4
   0   4  -5 922.565 99.6138   9
   0  -4   5 1136.48 99.3940   9
   0  -4   5 1027.50 99.9095   1
   0   4  -5 1150.04 100.405   3
   0  -4  -5 1367.97 100.887   3
   0   4   5 911.577 99.0308   3
   0  -4   5 886.714 98.8552   3
   0  -4  -5 797.688 98.7700  12
   0  -4   5 978.943 98.0213  12
   0   4  -5 956.170 99.6438  15
   0   4   5 830.380 94.3268  15
   0  -4  -6 37.2776 12.9122  12
   0  -4   6 37.5425 13.5539   3
   0   4   6 40.1881 14.0223   3
   0   4  -6 35.6525 12.5584   9
   0  -4   6 63.3460 14.3006   1
   0  -4  -6 53.9252 14.8647  13
   0   4   6 23.9504 8.23435  15
   0   4  -7 3548.10 332.896   9
   0   4  -7 4467.65 336.979  13
   0  -4  -7 4176.09 334.327  13
   0   4   7 3171.88 331.737   3
   0  -4   7 3262.84 332.121   3
   0  -4  -7 3096.46 331.705  12
   0   4   7 2844.86 324.488  15
   0   4  -7 4138.14 334.181  15
   0   4  -8 96.1041 23.2419  15
   0   4  -8 95.6857 21.3290   9
   0   4   8 77.5849 19.9362   3
   0  -4   8 127.163 23.9804   3
   0  -4  -8 81.8809 20.1992  12
   0   4  -8 96.8801 24.3098  13
   0  -4  -8 84.9508 21.1654  13
   0  -4  -9 4182.49 324.185  13
   0   4  -9 3901.81 325.466  13
   0   4  -9 3124.78 319.985   9
   0   4   9 2467.21 317.619   3
   0  -4   9 2940.38 320.473   3
   0  -4  -9 2779.48 319.372  12
   0   4  -9 3871.59 322.863  15
   0   4 -10 73.5259 25.1858  15
   0  -4 -10 35.4558 24.7878   9
   0   4 -10 48.6351 21.8076   9
   0   4  10 62.9963 19.7017   3
   0  -4  10 98.8793 24.8360   3
   0  -4 -10 40.6855 19.9795  12
   0  -4 -10 40.4148 22.8149  13
   0   4 -10 54.4711 24.8378  13
   0   4 -11 700.200 73.8433  15
   0  -4  11 344.723 64.3798   3
   0   4 -11 769.757 78.9119  13
   0  -4 -11 656.231 73.2200  13
   0   4 -11 545.552 69.0844   9
   0  -4 -11 495.180 70.4255   9
   0   4  11 426.562 66.3280   3
   0  -4 -11 433.713 67.3096  12
   0   4 -12-4.06552 26.2383  15
   0   4 -12-4.92962 35.4129  13
   0  -4 -12 25.2075 27.6970  13
   0   4 -12 4.23225 23.1360   9
   0  -4  12 4.73829 27.4256   3
   0   4  12 4.52060 23.9514   3
   0   5   0 2.64133 9.40286   4
   0  -5   0-2.93479 5.26506   6
   0   5   0-5.01351 9.23699   8
   0  -5   0 2.70614 11.2228   8
   0  -5   0 6.66963 7.17926  14
   0  -5   0 6.07679 8.42804  11
   0  -5  -1 354.791 38.3528  12
   0  -5  -1 390.881 40.4645  11
   0  -5   1 361.144 39.8297  11
   0   5   1 327.954 38.6446  11
   0   5  -1 211.098 40.7137   4
   0   5   1 232.114 40.0685   4
   0   5   1 289.104 43.7025   8
   0  -5   1 362.223 42.5103   8
   0   5  -1 428.640 38.7342  15
   0  -5   1 274.535 36.0828  14
   0   5   1 371.310 37.2616  14
   0   5   2 3267.09 311.543   8
   0  -5   2 3605.57 303.821   8
   0  -5   2 2956.40 296.162   3
   0   5   2 3318.18 296.947   3
   0  -5  -2 3140.06 295.570  13
   0   5  -2 2888.95 295.572  13
   0  -5   2 2723.71 298.550  14
   0   5   2 3496.32 299.247  14
   0  -5  -2 2770.29 299.925  12
   0  -5   2 3648.13 303.505  11
   0   5   2 3292.04 300.961  11
   0   5   2 3210.24 295.375  10
   0  -5   2 3034.43 295.134  10
   0  -5   2 3674.96 304.108   9
   0   5   2 2578.35 302.219   4
   0  -5   2 3424.16 310.771   4
   0   5   2 2919.93 298.134   6
   0  -5   2 2995.16 304.998   7
   0   5   3 2642.71 240.852  14
   0   5  -3 2404.04 237.705  13
   0  -5  -3 2432.07 237.482  13
   0  -5  -3 2143.35 240.903  12
   0   5   3 2535.44 240.671  11
   0   5   3 2133.66 241.826   4
   0  -5   3 2468.09 250.236   4
   0  -5   3 2979.35 244.234   9
   0   5  -3 2168.41 237.466   3
   0  -5   3 2378.46 238.093   3
   0   5   3 2499.49 238.793   3
   0  -5  -3 2922.69 238.420   3
   0  -5   3 2762.89 243.363   8
   0   5  -3 2634.90 241.762  15
   0   5   3 2384.41 241.832   6
   0  -5   3 2356.86 243.720   7
   0  -5  -4 4573.79 503.189  12
   0   5   4 5367.51 502.919  11
   0  -5   4 5924.58 514.523   4
   0  -5   4 6061.23 504.599   9
   0  -5  -4 5410.00 500.684  13
   0   5  -4 5493.48 501.687   3
   0  -5   4 4833.46 500.952   3
   0   5   4 4658.38 501.148   3
   0  -5  -4 5805.56 501.333   3
   0   5  -4 5397.73 504.165  15
   0  -5   4 4581.54 504.051   1
   0  -5  -5 301.923 47.9123  12
   0   5   5 357.535 47.4594  11
   0  -5   5 433.853 56.4736   4
   0  -5   5 501.699 49.7072   9
   0   5  -5 472.187 51.4102   9
   0   5   5 367.607 44.0908  15
   0  -5  -5 533.544 48.8826   3
   0  -5   5 391.098 47.6499   3
   0   5   5 449.828 48.8105   3
   0   5  -5 463.919 48.6220   3
   0  -5   5 442.943 50.8720   1
   0   5  -5 434.594 48.1851  13
   0  -5  -5 493.394 48.2217  13
   0   5   6 1705.22 210.648  11
   0   5   6 1987.95 206.431  15
   0  -5   6 2274.34 213.007   3
   0   5   6 1931.15 211.680   3
   0   5  -6 2229.82 214.068   9
   0  -5   6 2345.56 214.498   1
   0  -5  -6 2023.18 213.783  12
   0  -5  -6 2643.22 212.911  13
   0   5  -6 2603.59 214.174  13
   0   5  -7 316.668 44.5090   9
   0  -5  -7 435.347 45.8619  13
   0   5  -7 501.710 49.0873  13
   0  -5   7 287.255 43.5379   3
   0   5   7 323.144 44.2257   3
   0  -5  -7 332.137 45.6485  12
   0   5   7 315.075 38.0575  15
   0   5  -7 470.052 49.0242  15
   0   5  -8 301.975 38.2398  15
   0  -5   8 192.334 32.2712   3
   0   5   8 133.543 29.2902   3
   0  -5  -8 126.068 29.4960  12
   0   5  -8 217.773 34.2293  13
   0  -5  -8 274.734 34.2927  13
   0   5  -8 202.242 33.1050   9
   0   5  -9 263.650 38.2938  15
   0   5  -9 162.882 32.4498   9
   0  -5   9 146.826 32.5130   3
   0   5   9 177.215 33.7981   3
   0  -5  -9 169.580 33.2513  12
   0   5  -9 236.947 38.3630  13
   0  -5  -9 225.005 35.5351  13
   0   5 -10 484.717 60.3286  15
   0   5  10 345.526 54.3904   3
   0   5 -10 395.330 55.5895   9
   0  -5 -10 446.851 56.8959  13
   0   5 -10 573.982 63.6539  13
   0  -5 -10 356.011 55.4110  12
   0  -5  10 325.280 54.1213   3
   0   5  11 220.352 42.2699   3
   0  -5  11 228.437 44.2025   3
   0  -5 -11 226.145 46.6209   9
   0   5 -11 280.385 49.6357  15
   0  -5 -11 211.810 43.5299  12
   0   5 -11 318.164 51.5125  13
   0  -5 -11 396.417 49.8804  13
   0   5 -11 251.310 44.1262   9
   0  -5 -12 973.305 103.572  13
   0   5 -12 729.602 99.5307   9
   0  -6   0 839.822 68.8864   6
   0   6   0 779.624 77.7805   8
   0  -6   0 900.324 72.8734  11
   0  -6   1 1593.05 187.231  14
   0   6   1 2117.73 188.336  14
   0  -6  -1 1537.63 188.182  12
   0  -6  -1 2465.91 193.434  11
   0  -6   1 2238.30 192.147  11
   0  -6  -1 2310.07 202.386   4
   0  -6   1 2038.08 201.150   4
   0   6   1 2041.46 199.164   8
   0   6  -1 1439.85 195.479   7
   0  -6   1 2033.47 195.322   8
   0  -6   1 1941.02 186.419   6
   0   6  -2 4046.86 355.465  15
   0   6   2 3241.65 363.960   8
   0  -6   2 3490.91 348.994   3
   0   6   2 4218.17 353.332  14
   0  -6   2 3157.04 352.544  14
   0  -6  -2 3123.50 353.826  12
   0   6   2 3702.58 355.402  11
   0   6   2 3933.96 348.275  10
   0  -6   2 3845.48 347.879  10
   0  -6   2 4598.63 360.867   9
   0  -6  -2 4258.52 366.001   4
   0  -6   2 3163.49 348.813   5
   0   6   2 3425.41 350.179   5
   0  -6   2 4035.92 367.123   4
   0  -6   2 3808.92 358.952   1
   0   6  -3 571.963 61.2167  15
   0   6   3 557.205 71.2153   8
   0  -6  -3 532.299 55.2506  13
   0   6   3 625.935 58.1650  14
   0   6  -3 511.139 55.5024  13
   0  -6  -3 432.844 59.0399  12
   0   6   3 506.280 59.7377  11
   0  -6   3 577.456 54.7929  10
   0   6   3 548.766 54.7746  10
   0  -6   3 684.935 73.2062   4
   0  -6  -3 572.210 67.4038   4
   0  -6   3 529.557 56.1324   3
   0   6   3 552.070 56.9387   3
   0  -6   3 697.035 65.0144   9
   0   6   3 499.949 57.9065   6
   0   6   4 46.3932 12.3526  11
   0  -6  -4 34.9605 13.9942  12
   0   6  -4 31.9939 9.87111  13
   0  -6  -4 45.0613 10.2080  13
   0   6  -4 56.3925 14.8838  15
   0  -6   4 36.3476 21.7624   4
   0   6   4 56.8462 12.8670  14
   0   6   4 45.8193 14.3634   6
   0   6  -4 33.9277 10.4177   3
   0  -6   4 48.1200 10.4038   3
   0   6   4 37.1102 11.1960   3
   0  -6  -5 23.9780 11.4581   3
   0  -6   5 34.9383 11.2692   3
   0   6   5 29.0248 11.7444   3
   0   6  -5 32.1997 10.9729   3
   0   6   5 17.4947 10.2828  11
   0  -6  -5 41.1067 12.1513  13
   0  -6  -5 20.8540 12.1218  12
   0  -6   5 24.4628 19.9305   4
   0  -6   5 29.9179 14.4414   1
   0   6  -5 35.1724 11.1620  13
   0   6   5 14.0845 7.60944  15
   0   6  -5 27.2748 12.8449  15
   0   6   6 382.660 42.5622  11
   0  -6  -6 297.948 43.6430  12
   0  -6   6 388.896 43.1721   3
   0   6   6 293.779 41.6108   3
   0  -6   6 371.236 46.2945   1
   0  -6  -6 453.013 42.8563  13
   0   6  -6 418.717 43.5854  13
   0   6   6 277.278 36.4309  15
   0   6   7 350.178 45.7814  11
   0  -6   7 477.278 52.5231   1
   0  -6  -7 293.828 48.0991  12
   0  -6  -7 425.366 47.8000  13
   0   6  -7 430.999 49.4757  13
   0   6   7 382.611 48.2461   3
   0  -6   7 389.903 48.1041   3
   0   6  -8 2165.80 187.424  15
   0  -6   8 1673.50 181.499   3
   0   6   8 1667.95 181.614   3
   0   6  -8 1872.16 184.496   9
   0   6   8 1501.49 177.790  11
   0   6  -8 2145.16 184.609  13
   0  -6  -8 2063.13 182.074  13
   0  -6  -8 1518.27 182.321  12
   0   6  -9 1554.17 127.841  15
   0   6   9 1068.13 119.161   3
   0  -6   9 1072.77 119.575   3
   0   6  -9 1039.73 119.695   9
   0   6   9 841.068 113.439  11
   0  -6  -9 929.967 119.195  12
   0  -6  -9 1408.43 121.054  13
   0   6  -9 1373.21 123.750  13
   0   6 -10 396.586 56.5509  15
   0  -6  10 375.798 53.2645   3
   0  -6 -10 484.403 54.2941  13
   0   6 -10 467.492 58.2179  13
   0  -6 -10 317.781 52.9076  12
   0   6 -10 375.951 54.2638   9
   0   6  10 248.317 48.7482   3
   0   6 -11 307.001 52.5444   9
   0   6 -11 506.023 63.2805  15
   0  -6  11 325.557 53.3670   3
   0   6  11 278.056 49.7138   3
   0   6 -11 440.257 59.2848  13
   0  -6 -11 363.874 52.8498  13
   0   7   0-5.09540 16.7941   7
   0  -7   0-2.90799 8.64023   6
   0   7   0 3.35381 13.1571   8
   0  -7  -1 202.041 31.5963  12
   0  -7  -1 310.482 37.0170  11
   0  -7  -1 250.852 26.3086   2
   0  -7  -1 216.589 39.9825   4
   0   7   1 224.964 39.4425   8
   0  -7   1 242.793 29.1176   6
   0   7  -1 242.491 41.0762   7
   0   7  -1 306.864 33.3227  15
   0   7  -2 169.385 24.8550  15
   0   7   2 147.830 32.6388   8
   0  -7   2 148.455 27.3756   1
   0  -7  -2 134.399 31.6503   4
   0  -7   2 201.574 38.0099   4
   0   7   2 169.045 21.8033  14
   0  -7  -2 129.454 23.0369  12
   0   7   2 143.854 23.6933  11
   0   7  -3 4187.37 381.675  15
   0   7   3 3565.59 391.905   8
   0  -7   3 4224.57 385.972   1
   0  -7  -3 3254.93 379.684  12
   0   7   3 3822.60 380.833  11
   0   7   3 4165.46 373.543  10
   0  -7   3 4074.03 373.089  10
   0  -7   3 3640.42 374.575   3
   0   7   3 3994.89 375.721   3
   0   7   3 4503.36 377.830  14
   0   7   3 3604.08 376.194   5
   0  -7  -3 4824.75 394.276   4
   0  -7   3 4905.52 398.818   4
   0  -7   3 3460.96 374.556   5
   0   7   3 3866.13 375.992   6
   0   7  -4 460.446 49.6494  15
   0   7   4 381.956 58.7190   8
   0   7  -4 385.367 42.0670  13
   0  -7  -4 374.500 41.3527  13
   0   7   4 440.050 43.5615  14
   0   7   4 458.064 47.5405  11
   0   7   4 423.641 40.8932  10
   0  -7   4 398.319 40.6128  10
   0  -7   4 320.671 41.7739   3
   0   7   4 366.754 43.3027   3
   0  -7  -4 338.223 46.3170  12
   0   7   4 326.388 43.7128   6
   0  -7   4 490.214 61.0389   4
   0   7  -5 1570.07 154.208  13
   0  -7  -5 1742.29 154.154  13
   0   7   5 1785.96 154.273  14
   0   7   5 1633.97 156.827  11
   0   7   5 1524.49 152.302  10
   0  -7   5 1427.12 154.143   3
   0   7   5 1496.88 155.289   3
   0   7   5 1294.55 156.051   6
   0  -7   5 1630.42 171.433   4
   0  -7  -5 1262.56 157.471  12
   0   7  -5 1853.68 161.891  15
   0   7  -6 260.966 36.7257  15
   0   7   6 207.775 30.2462   3
   0  -7   6 202.714 29.7764   3
   0  -7  -6 195.216 33.2236  12
   0   7   6 209.346 29.6289  11
   0   7  -6 216.108 30.1049  13
   0  -7  -6 228.937 29.1046  13
   0   7  -7 847.325 90.5476  15
   0  -7   7 697.019 84.1553   3
   0   7   7 678.523 84.3121   3
   0  -7  -7 888.726 84.8282  13
   0   7  -7 845.870 85.6974  13
   0  -7  -7 721.391 88.1440  12
   0   7   7 766.651 83.3644  11
   0  -7   7 897.438 91.1280   1
   0  -7   8 67.9752 20.6503   3
   0   7   8 59.4131 19.5025   3
   0  -7  -8 61.1834 19.7278  13
   0   7  -8 73.4840 22.7743  13
   0  -7  -8 53.9279 22.2080  12
   0   7   8 46.0625 15.7572  11
   0   7   9 96.7370 25.2878   3
   0  -7   9 129.734 28.1758   3
   0   7  -9 73.8887 26.2018  13
   0  -7  -9 110.531 27.0789  13
   0  -7  -9 106.350 28.0605  12
   0  -7  10 3.39023 19.6285   3
   0   7  10-13.4149 19.9347   3
   0   7 -10-4.14857 28.7406  15
   0   7 -10 6.80846 24.2441  13
   0  -7 -10-12.2084 21.5648  12
   0  -7 -10-2.81595 20.5869  13
   0   7 -11 384.368 55.0800  13
   0  -7  11 326.693 50.1631   3
   0   7  11 235.861 44.8326   3
   0   8   0 1613.96 221.931   7
   0   8   0 2285.65 208.933  15
   0  -8   0 2200.89 224.793   4
   0  -8   1 26.9195 10.2201   6
   0   8  -1 30.8518 19.0635   7
   0  -8  -1 41.4524 19.2163   4
   0   8   1 12.3487 17.6397   8
   0  -8  -1 20.1561 11.5382  12
   0   8   1 31.1795 11.8367  15
   0   8  -1 18.1185 12.2484  15
   0  -8  -1 18.9071 5.80829   2
   0  -8   2 1755.42 183.283   6
   0  -8  -2 2208.30 202.439   4
   0  -8   2 2148.47 204.355   4
   0  -8   2 2224.96 195.973   1
   0   8   2 1747.67 198.267   8
   0  -8  -2 1576.16 186.400  12
   0   8  -2 2090.48 188.599  15
   0   8   3 74.2089 9.73257  10
   0  -8   3 91.9078 27.6047   4
   0  -8   3 101.600 22.7904   1
   0   8   3 70.2030 27.1454   8
   0   8  -3 96.1358 21.4766  15
   0   8   3 80.9960 19.9177  11
   0  -8  -3 70.8131 17.4461  12
   0   8   4 13.9326 8.82003   6
   0   8  -4 34.6611 15.9072  15
   0   8   4-5.26234 20.7243   8
   0  -8   4 57.2113 21.2472   1
   0  -8  -4 4.87245 13.4407  12
   0   8   4 29.5570 12.9915  11
   0   8   4 21.8711 7.47275  10
   0  -8   4 25.8929 23.1822   4
   0   8   4 27.6199 10.9564   5
   0  -8   4 15.3011 8.43651   3
   0   8   5 11.1960 11.1454   3
   0  -8   5 13.7798 9.97320   3
   0   8  -5 19.4171 16.0995  15
   0   8   5-5.59601 19.9586   8
   0  -8  -5 10.7533 13.5892  12
   0   8   5 18.4815 12.1054  11
   0  -8   6 221.844 33.0303   3
   0   8   6 220.740 33.3668   3
   0   8  -6 319.718 42.5660  15
   0   8   6 288.118 35.9165  11
   0  -8  -6 225.194 37.6777  12
   0  -8  -6 242.613 32.3591  13
   0   8  -6 327.922 34.3468  13
   0   8   7 23.5189 14.3211  11
   0   8  -7 16.7797 21.6596  15
   0   8   7 51.7676 17.0324   3
   0  -8   7 37.3318 16.1112   3
   0  -8  -7 45.2715 19.7229  12
   0   8  -7 32.5265 16.5975  13
   0  -8  -7 32.2034 15.3822  13
   0   8  -8 1936.86 167.057  15
   0   8  -8 1699.46 157.501  13
   0  -8  -8 1381.48 159.993  12
   0  -8   8 1400.43 155.743   3
   0   8   8 1406.76 156.222   3
   0   8   9-8.66336 18.2252   3
   0   8  -9 20.2931 27.8456  15
   0   8  -9-8.07941 20.6582  13
   0  -8  -9 3.78881 18.7312  12
   0   8 -10 597.106 74.7539  13
   0  -9   0 5.23299 22.2679   4
   0   9   0 12.6785 22.5691   7
   0  -9   0-4.26819 10.9385  12
   0   9   0 10.3579 13.2454  15
   0  -9  -1 61.3874 28.1657   4
   0   9   1 27.4753 27.1591   7
   0   9  -1 22.7732 25.6336   7
   0  -9   1 25.2086 11.1817   6
   0   9   1 30.8082 21.6209   8
   0  -9  -1 43.5574 15.4639  12
   0   9   1 45.4391 13.9399  15
   0   9  -1 41.0336 15.8129  15
   0   9  -2 149.688 24.9330  15
   0   9   2 153.649 21.6644  15
   0   9   2 162.252 36.3349   8
   0  -9   2 109.919 35.8728   4
   0  -9   2 184.975 33.0698   1
   0  -9   2 122.305 19.8663   6
   0  -9  -2 109.657 22.4938  12
   0  -9   3 2349.20 241.182   4
   0  -9  -3 1842.68 221.213  12
   0   9   3 2323.18 237.268   8
   0  -9   3 2119.19 218.188   6
   0  -9   3 2603.95 231.528   1
   0   9  -3 2662.84 225.067  15
   0  -9  -4 544.937 74.2080  12
   0   9   4 663.167 75.0636  11
   0   9   4 682.707 89.8631   8
   0  -9   4 767.943 83.0868   1
   0   9  -4 792.248 78.9469  15
   0  -9  -5 503.174 70.4413  12
   0   9   5 607.933 69.7406  11
   0   9   5 545.050 82.1931   8
   0  -9   5 720.263 78.3230   1
   0   9  -5 778.098 76.3147  15
   0  -9  -6 121.238 28.1795  12
   0   9   6 148.346 26.9241  11
   0   9   6 120.344 39.0860   8
   0   9  -6 242.138 36.9841  15
   0  -9   6 183.188 35.6065   1
   0   9   7 339.571 62.7831   8
   0  -9  -7 330.012 52.2493  12
   0   9  -7 493.446 59.4826  15
   0  -9  -8 36.3211 23.6758  12
   0   9  -8 75.1115 30.2391  15
   0  -9  -9-11.6443 23.6715  12
   0 -10   0 157.557 29.0714  12
   0  10   0 212.344 49.1289   7
   0  10   0 228.296 30.4593  15
   0  10   1 768.895 105.696   7
   0  10  -1 590.369 96.7910   7
   0  10   1 875.090 82.2133  15
   0  10  -1 873.128 84.6029  15
   0 -10  -1 594.057 82.0020  12
   0 -10   1 930.395 95.0685   1
   0 -10  -2 412.531 54.0039  12
   0  10   2 437.426 65.6941   8
   0  10   2 248.135 67.7240   7
   0 -10   2 461.291 61.9992   1
   0  10   2 506.302 50.6221  15
   0  10  -2 490.979 55.8419  15
   0 -10  -3 20.5880 17.4403  12
   0 -10   3 30.3147 22.0302   1
   0  10   3 28.2314 11.6049  15
   0  10  -3 10.1828 18.4061  15
   0  10   3 10.5993 23.2015   8
   0 -10  -4 2.72876 14.9165  12
   0  10   4 5.69457 24.2313   8
   0  10  -4-2.83829 18.9048  15
   0 -10   4 7.68270 20.3505   1
   0  10   5-23.8428 25.3663   8
   0  10  -5 43.7653 25.4160  15
   0 -10  -5 8.91083 15.7412  12
   0 -10   5 3.89212 21.5972   1
   0  10   6 12.2479 24.7213   8
   0  10  -6-6.83703 23.6800  15
   0 -10  -6 3.22396 15.6431  12
   0 -10   6 3.90194 22.8865   1
   0  10   7 188.413 48.2450   8
   0  10  -7 381.438 51.9833  15
   0 -10   7 365.668 50.3695   1
   0 -10  -7 207.674 41.6402  12
   0 -10  -8 222.177 39.3526  12
   0  10   8 188.333 49.5567   8
   0  11   0 7.17766 30.5403   7
   0  11   0-1.85479 14.6590  15
   0 -11   0 2.30549 14.3841  12
   0  11   1 6.46865 13.4257  15
   0  11  -1 25.2145 18.1121  15
   0 -11  -1 2.39150 14.7571  12
   0 -11   1-2.25368 13.7417  12
   0 -11   1 4.06041 24.7430   1
   0  11   1 15.4829 33.7574   7
   0  11   2 341.146 38.6548  15
   0  11  -2 341.199 44.1967  15
   0  11   2 300.597 54.3318   8
   0 -11  -2 251.115 41.3645  12
   0 -11   2 309.314 49.1944   1
   0  11   2 303.074 64.8103   7
   0 -11  -3 53.0913 21.0190  12
   0  11   3 75.1104 35.3727   8
   0  11  -3 110.965 26.4044  15
   0 -11   3 85.1794 31.0025   1
   0  11   4 427.547 72.4108   8
   0  11  -4 527.576 62.9642  15
   0 -11  -4 423.619 59.4743  12
   0 -11   4 587.413 69.9818   1
   0  11   5 41.9896 31.3114   8
   0  11  -5 38.6719 24.9747  15
   0 -11  -5-3.07553 18.3629  12
   0 -11   5 32.9874 24.2512   1
   0  11   6 401.841 70.7351   8
   0  11  -6 518.945 63.8928  15
   0 -11  -6 347.313 56.5467  12
   0 -11   6 518.512 66.2750   1
   0 -11  -7 42.0179 22.2759  12
   0  11   7 56.9333 35.8724   8
   0  12   0 7.44077 30.0943   7
   0 -12   0 33.2663 30.9573   1
   0  12   1 365.111 69.8216   7
   0  12  -1 311.814 43.3238  15
   0 -12   1 330.694 55.4226   1
   0  12   2 16.5030 29.4045   7
   0 -12   2 25.4133 29.0896   1
   0  12  -2 7.25752 20.5007  15
   0  12  -3 103.301 28.5736  15
   0  12   3 96.6147 36.1430   8
   0 -12  -3 91.8008 23.1506  12
   0  12   3 101.257 45.5917   7
   0 -12   3 84.8385 34.9397   1
   0  12   4 11.1849 26.6113   8
   0 -12   4 8.58056 28.2870   1
   0 -12  -4 2.90125 17.4690  12
   0  12  -4 8.94823 21.8069  15
   0 -12  -5 3.11404 18.9711  12
   0  12   5 17.4461 32.7330   8
   0  12  -5-9.94248 26.3813  15
   0 -12  -6 9.94158 20.4546  12
   0 -13   0-29.9412 32.6791   1
   0 -13   1 94.2512 36.9354   1
   0 -13  -1 41.5285 30.4129   1
   0 -13   2 68.9677 33.1980   1
   0  13  -4 147.610 34.2389  15
   1   0 -13 4.28455 25.1319   9
  -1   0  12 63.5057 26.7190   3
   1   0 -12 94.9479 34.1126  13
   1   0 -12 96.2685 26.8274   9
  -1   0  11 4.11194 17.9289   3
   1   0 -11 3.42597 16.2988   9
   1   0 -11-4.18723 25.1966  13
   1   0 -10 4495.61 336.463  13
   1   0 -10 3557.74 327.660   9
   1   0  -9 2.62884 12.7557   9
   1   0  -9-3.21306 17.0223  13
  -1   0   9-3.19090 14.2417   3
   1   0  -9-4.82443 13.1862  12
   1   0  -8 3403.79 311.853   9
   1   0  -8 4095.37 317.804  13
   1   0  -8 3210.66 310.883  12
   1   0  -7 9.34141 9.24488   9
   1   0  -7-2.30965 10.0779  13
  -1   0   7-2.23131 10.8321   3
   1   0  -7 31.9213 10.5444  12
   1   0  -6 5343.12 480.847   1
   1   0  -6 5264.13 482.636   9
   1   0  -6 4969.89 481.671  12
  -1   0   6 5505.11 481.335  12
  -1   0   6 4469.69 483.177   3
   1   0  -6 5215.43 481.477  15
  -1   0   6 4503.00 479.171  15
  -1   0   5 0.86692 5.23002  15
  -1   0   5 6.18622 3.83277   4
  -1   0   5 6.14780 5.35267  12
   1   0  -5 2.24617 4.29054  12
  -1   0   5 14.3022 7.41645   3
   1   0  -5 0.94577 4.94280   1
   1   0  -5 1.10025 5.84039  15
   1   0  -4 6.98684 5.01602  15
   1   0  -4 10.3931 4.54945  12
  -1   0   4 1.23181 4.86433   3
   1   0  -4 7.88357 4.75481   1
  -1   0   3 4.84551 3.37059  12
   1   0  -3 1.96921 3.37352  15
  -1   0   3 0.90276 3.22463   3
   1   0  -3 3.56573 3.18904   1
   1   0  -2 5618.53 505.706   1
  -1   0   2 5229.86 505.333   1
  -1   0   2 5806.64 507.373   3
  -1   0   2 4973.28 506.215  15
  -1   0   2 5471.43 506.176  12
  -1   0   2 4986.80 506.536  13
  -1   0  -1 1.02429 2.33983   9
   1   0   1 5.30050 3.81398   3
  -1   0  -1 0.34995 1.94500  15
   1   0   2 9441.28 896.419   3
   1   0   2 9312.13 893.722  15
  -1   0  -2 9820.84 893.668  15
  -1   0  -2 8983.12 894.948   9
   1   0   3-1.34202 5.71087   3
  -1   0  -3-0.63053 3.49922  15
   1   0   3-1.26803 3.71962  15
   1   0   4 197.684 25.8847   3
  -1   0  -4 198.703 22.2665  15
   1   0   4 164.861 22.0065  15
  -1   0  -4 209.936 22.0460   4
  -1   0  -5 8.23539 6.71513  15
   1   0   5 0.97350 6.48410  15
  -1   0  -5-6.91336 7.88668   9
   1   0   5-4.12611 7.60255   3
  -1   0  -5 4.54098 3.93263   4
   1   0   6 468.193 61.1916   3
  -1   0  -6 568.713 57.1386  15
  -1   0  -6 532.929 60.3181   9
  -1   0  -7 9.82846 10.2226   9
  -1   0  -7 12.3477 10.6208  15
   1   0   7 2.88538 11.3481   3
  -1   0  -8 9057.95 746.501  15
  -1   0  -8 8290.87 750.963   9
  -1   0  -9-4.18776 15.1789  15
  -1   0  -9-3.27511 14.9510   9
   1   0   9-7.59242 17.7002   3
   1   0  10 1913.64 220.800   3
  -1   0 -10 2382.46 222.256   9
  -1   0 -11-9.33176 28.4296  13
  -1   0 -11-4.20892 18.3581   9
   1   0  11-4.77239 21.3035   3
  -1   0 -12 546.291 75.5811  13
  -1   0 -12 451.981 67.8054   9
   1  -1 -13 956.058 115.311   9
   1   1 -13 1015.05 114.804   9
  -1  -1  12 173.864 44.7712   3
   1   1 -12 338.390 47.8256   9
   1  -1 -12 305.041 48.5797   9
   1  -1 -12 467.459 60.0313  13
  -1  -1  11 1717.54 232.074   3
   1  -1 -11 2321.54 234.666   9
   1   1 -11 2332.08 232.868   9
   1  -1 -10 67.8203 22.0544   9
   1   1 -10 91.2036 22.0913   9
  -1  -1  10 92.4726 25.6129   3
   1  -1 -10 73.8694 20.9974  12
   1  -1 -10 101.133 28.3817  13
   1   1  -9 51.7117 16.7457   9
   1  -1  -9 90.3737 20.6652   9
  -1  -1   9 64.0435 19.2162   3
   1  -1  -9 70.5252 19.5979  12
   1  -1  -9 91.1968 23.5510  13
   1   1  -9 73.0036 20.7537  15
   1  -1  -8 112.289 23.0419   9
   1   1  -8 143.536 23.0447   9
   1  -1  -8 128.629 22.5669  12
  -1  -1   8 122.821 25.6501   3
   1  -1  -8 182.670 27.9193  13
   1   1  -8 127.378 23.1598  15
   1   1  -7 1909.19 166.148  15
  -1  -1   7 1178.74 163.996   3
   1  -1  -7 1671.09 162.736   1
   1   1  -7 1680.51 164.817   9
   1  -1  -7 1748.54 165.944  12
   1  -1  -7 1890.28 169.083  13
  -1  -1   6 751.467 86.0538   4
  -1   1   6 747.395 85.3999  15
   1   1  -6 913.466 88.7753  15
  -1  -1   6 773.764 89.5621   3
   1  -1  -6 853.166 86.3286   1
   1   1  -6 843.247 87.8173   1
   1   1  -6 917.922 88.2487   9
  -1  -1   6 1024.06 88.0765  12
   1   1  -6 854.166 87.6023  12
   1  -1  -6 1083.44 92.3838  13
  -1   1   5 9286.98 958.297  15
  -1  -1   5 9708.47 961.857   3
   1   1  -5 10097.7 960.137   1
   1  -1  -5 10760.2 958.697   1
   1   1  -5 10019.0 959.674   9
  -1  -1   5 10903.0 959.470  12
  -1   1   5 10962.5 960.582  12
   1   1  -5 9778.71 959.336  12
  -1  -1   5 9416.39 959.912   4
  -1  -1   4 3991.93 336.952   4
  -1   1   4 3196.10 334.235  15
  -1  -1   4 3414.07 336.859   3
   1  -1  -4 4019.28 337.526   3
   1   1  -4 3180.36 334.987   1
  -1  -1   4 3185.30 334.288   1
   1   1  -4 3637.74 334.891   9
   1  -1  -4 3728.07 336.764  13
  -1  -1   4 3642.68 334.650  12
   1   1  -4 3495.11 334.650  12
  -1  -1   3 9749.60 884.159  12
  -1   1   3 9093.16 885.369  12
   1   1  -3 8659.44 883.960  12
  -1  -1   3 9797.40 885.819   4
   1  -1  -3 9695.56 885.799  13
   1   1  -3 9449.69 884.078   9
  -1  -1   3 8683.29 884.541   1
   1   1  -3 8739.98 885.262   1
  -1  -1   3 8952.83 885.833   3
  -1  -1   3 9935.66 884.461  15
   1  -1  -3 10116.5 886.282   3
   1  -1  -2 1976.45 202.657  13
  -1  -1   2 2001.64 202.476  13
  -1  -1   2 2102.81 202.402  10
   1   1  -2 2306.74 201.437   9
  -1  -1   2 2115.63 203.193   3
  -1  -1   2 2230.91 203.264   1
  -1  -1   2 2143.36 201.499  12
   1  -1  -2 1917.61 203.088  12
   1   1  -2 2128.71 201.479  12
  -1  -1   2 2056.83 202.004  15
   1  -1  -1 3333.39 305.012  10
  -1  -1   1 3436.79 305.126  10
  -1  -1   1 2955.21 304.458  15
   1  -1  -1 3322.41 305.234   2
   1   1  -1 3094.93 306.630  11
  -1  -1   0 14.7206 4.23821   5
   1   1   0 30.1375 6.06003  11
   1  -1   0 15.0833 4.55785  14
  -1  -1   0 17.6362 3.72203   2
  -1   1   0 15.9716 2.84408   1
  -1  -1   0 16.5153 4.64895   6
  -1  -1   0 16.8919 2.54791  12
  -1   1  -1 1615.02 159.169   9
   1  -1   1 1630.45 159.369   3
  -1  -1  -1 1839.94 159.415   3
  -1  -1  -1 1616.72 157.815  12
  -1   1  -1 1598.19 157.708   1
  -1   1  -2 978.074 103.104   1
  -1   1  -2 1133.03 105.387   4
  -1  -1  -2 1277.39 105.630   3
   1  -1   2 1107.10 105.553   3
   1  -1   2 1153.00 104.351   9
   1   1   2 1037.41 101.887  15
  -1   1  -2 999.288 103.407  15
  -1  -1  -2 1032.97 101.751  15
  -1  -1  -2 1050.57 103.680  12
  -1   1  -3 11169.4 1083.10   4
  -1  -1  -3 14654.6 1084.34   3
   1  -1   3 10822.5 1083.49   3
   1  -1   3 13199.5 1082.71   9
  -1   1  -3 12301.2 1081.58  15
   1  -1   3 10621.2 1080.98  15
   1   1   3 10425.3 1079.59  15
  -1  -1  -3 11659.8 1079.74  15
   1  -1   3 11265.5 1081.52  12
  -1  -1  -3 9971.34 1081.60  12
  -1   1  -4 2147.77 230.786   4
   1  -1   4 2619.40 233.703   3
  -1   1  -4 2363.07 231.343   9
  -1   1  -4 2741.91 230.364  15
   1  -1   4 2102.96 228.775  15
  -1  -1  -4 2598.65 228.428  15
   1   1   4 2301.67 227.988  15
  -1  -1  -4 2246.20 230.594  12
  -1   1  -5 7109.61 677.927   4
  -1   1  -5 7355.28 679.936   9
  -1  -1  -5 6353.26 678.798  12
   1  -1   5 8253.02 678.469  12
  -1   1  -5 8421.39 678.492  15
   1   1   5 6500.18 675.430  15
  -1  -1  -5 7507.79 676.451  15
   1  -1   5 6090.07 676.150  15
   1  -1   5 7140.29 681.940   3
  -1  -1  -6 1035.87 125.617   9
  -1   1  -6 1352.89 127.083   9
  -1  -1  -6 1186.40 125.565  12
   1  -1   6 1113.53 127.387   3
   1   1   6 1174.72 121.444  15
  -1   1  -6 1384.31 124.470  15
  -1  -1  -6 1348.00 123.080  15
   1  -1   7 1043.69 123.320   3
  -1   1  -7 1270.45 119.868  15
  -1  -1  -7 1218.29 118.323  15
  -1  -1  -7 1059.65 122.011   9
  -1   1  -7 1209.21 122.904   9
  -1  -1  -8 6.51847 10.5513  15
  -1   1  -8 7.85012 12.5554  15
  -1  -1  -8 9.05516 12.5476   9
  -1   1  -8 11.1596 11.2948   9
   1  -1   8 13.3395 15.5680   3
  -1   1  -9 92.2746 21.2009  15
   1  -1   9 64.4862 23.1604   3
  -1  -1  -9 82.4807 23.1426   9
  -1   1  -9 71.0110 21.6664   9
  -1   1 -10 130.413 27.5204  15
  -1   1 -10 139.893 29.3115   9
  -1  -1 -10 108.505 28.5719   9
   1  -1  10 89.8857 28.9171   3
  -1  -1 -11 605.693 76.5232   9
  -1   1 -11 641.098 76.9647   9
  -1  -1 -11 851.104 85.6083  13
  -1   1 -11 595.037 70.6692  15
   1  -1  11 372.604 72.3380   3
  -1   1 -12 313.920 52.8727   9
  -1  -1 -12 288.268 51.8558   9
   1   2 -13-4.09757 23.7315   9
   1  -2 -13 23.7083 23.8893   9
  -1  -2  12 63.8981 25.8247   3
  -1   2  12 92.7613 28.0650   3
   1  -2 -12 89.5291 34.9914  13
   1   2 -12 116.072 37.0973  13
   1   2 -12 102.384 27.4478   9
   1  -2 -12 61.0585 27.7388   9
   1  -2 -11 370.103 55.5212   9
   1   2 -11 429.492 55.2452   9
  -1   2  11 379.602 55.9013   3
  -1  -2  11 345.346 55.2791   3
   1  -2 -11 314.132 52.7939  12
   1   2 -11 545.536 64.6003  13
   1  -2 -11 558.494 64.5498  13
   1   2 -10 2059.86 203.646   9
   1  -2 -10 1838.54 205.173   9
   1   2 -10 2145.76 204.883  15
  -1  -2  10 1650.13 204.650   3
  -1   2  10 1610.04 203.688   3
   1  -2 -10 1875.89 204.114  12
   1   2 -10 2671.24 213.500  13
   1  -2 -10 2717.01 212.716  13
   1  -2  -9 3150.00 300.190   9
   1   2  -9 3220.61 296.285   9
   1   2  -9 3302.71 297.825  15
  -1   2   9 2195.59 295.078   3
  -1  -2   9 2567.05 297.341   3
   1  -2  -9 2698.66 296.239  12
   1   2  -9 3895.42 304.684  13
   1  -2  -9 3718.39 303.062  13
  -1   2   8 928.603 122.052   3
  -1  -2   8 1063.27 123.450   3
   1   2  -8 1265.46 123.163  15
   1  -2  -8 1371.45 126.636  13
   1   2  -8 1327.42 126.863  13
   1   2  -8 1216.47 121.594   9
   1   2  -7 1796.51 182.439   9
   1   2  -7 2158.69 184.985  15
  -1   2   7 1662.07 184.268   3
  -1  -2   7 1660.41 184.196   3
  -1  -2   7 1672.42 182.026   4
   1   2  -7 2043.83 187.278  13
   1  -2  -7 2080.46 186.708  13
  -1  -2   6 2065.96 244.351   4
   1   2  -6 2652.71 243.862   9
   1   2  -6 2891.28 245.452  15
  -1   2   6 2282.90 241.305  15
  -1  -2   6 2119.61 244.685   3
  -1   2   6 2183.75 244.616   3
  -1  -2   6 2757.66 243.164  12
   1  -2  -6 3187.58 248.136  13
   1   2  -6 2812.33 247.203  13
   1   2  -5 117.789 18.9003   1
  -1  -2   5 152.265 18.5293   1
  -1  -2   5 150.765 21.5409   4
  -1   2   5 121.282 14.6567   4
   1   2  -5 122.807 17.4421   9
  -1   2   5 104.430 16.6984  15
  -1   2   5 130.633 19.1534   3
  -1  -2   5 159.602 20.6865   3
   1  -2  -5 174.562 21.5806   3
  -1  -2   5 144.306 17.5856  12
   1  -2  -5 152.595 19.8113  13
  -1  -2   4 597.131 66.5702   1
  -1  -2   4 678.165 70.0539   4
  -1   2   4 603.503 65.2507   4
  -1  -2   4 728.654 66.0125   9
   1   2  -4 705.138 66.0766   9
  -1   2   4 508.273 65.1462  15
  -1  -2   4 630.439 65.5310  15
   1   2  -4 751.269 68.4726   3
  -1  -2   4 689.119 67.9797   3
  -1   2   4 671.373 67.6996   3
   1  -2  -4 695.971 67.8920   3
   1   2  -4 675.903 67.6012  13
   1  -2  -4 679.725 67.5298  13
   1  -2  -4 687.584 68.0460  12
  -1  -2   4 645.488 65.3035  12
   1  -2  -3 454.388 50.3258  12
  -1  -2   3 510.189 48.1276  12
  -1  -2   3 528.579 50.7416   1
  -1   2   3 455.335 49.3496   4
  -1  -2   3 567.663 53.6966   4
   1   2  -3 547.686 48.9256   9
  -1  -2   3 499.795 48.1605   9
   1  -2  -3 514.139 49.6351  13
   1   2  -3 456.985 49.3573  13
  -1  -2   3 487.721 49.7294   3
  -1   2   3 496.829 49.6944   3
  -1  -2   3 446.188 48.3433  15
   1   2  -3 317.247 48.2923   3
   1  -2  -3 546.302 50.1610   3
  -1  -2   2 3148.30 317.793  15
  -1  -2   2 3196.57 318.595   3
  -1   2   2 3304.33 318.463   3
   1  -2  -2 3428.44 320.320  12
  -1   2   2 3196.43 317.034  11
  -1  -2   2 3424.49 317.845  10
  -1   2   2 3566.07 317.995  10
  -1  -2   2 3600.00 317.902   9
  -1   2   2 3547.27 317.162   2
   1   2  -2 3203.95 318.283  13
  -1  -2   2 3096.12 317.930  13
   1  -2  -2 3358.98 318.383  13
  -1   2   2 3149.11 317.892  13
  -1  -2   2 3903.86 322.582   4
  -1   2   2 3273.25 319.979   4
   1   2  -1 6647.44 619.534  10
  -1   2   1 6602.63 619.924  10
  -1  -2   1 6297.85 619.654  10
   1  -2  -1 6647.42 619.523  10
  -1   2   1 6366.35 623.177   4
   1   2  -1 6054.00 623.173   8
   1   2  -1 6532.32 623.335   7
   1   2  -1 6655.63 619.904  15
  -1  -2   1 6563.07 619.720  15
   1  -2  -1 6587.40 619.860  11
   1   2  -1 6463.30 623.048  11
   1   2   0 6526.32 580.354  15
  -1  -2   0 6114.38 580.424  14
   1  -2   0 5233.95 583.549  14
  -1  -2   0 5897.50 581.101  12
  -1  -2   0 7348.47 585.957  11
  -1  -2   0 6266.44 581.456   2
  -1  -2   0 6127.21 584.724   6
   1   2   0 5970.23 583.500   6
  -1   2   0 5572.59 582.139   3
   1  -2   0 7017.10 582.887   8
   1   2   0 6130.38 587.945   8
  -1   2   0 5673.57 582.863   5
  -1   2   0 6271.97 585.418   4
  -1  -2   0 5494.05 582.223   5
  -1  -2  -1 5971.00 603.195  12
   1   2   1 6283.73 603.123  12
   1   2   1 6239.73 602.708   2
  -1   2  -1 5539.79 603.570   1
   1  -2   1 6281.56 604.962   5
   1   2   1 6108.64 605.240   5
   1  -2   1 7177.73 606.149   9
   1  -2   1 6496.84 604.420   3
  -1  -2  -1 7070.51 603.943   3
  -1   2  -1 7185.48 604.470   3
   1   2   1 6191.30 604.711   3
   1  -2   1 7002.91 605.131   7
   1  -2   1 5758.44 604.445  14
  -1   2  -2 2725.43 280.251   1
  -1   2  -2 2570.88 283.626   4
   1  -2   2 3361.21 282.068   9
  -1  -2  -2 2771.59 280.262  12
   1   2   2 2999.38 280.090  12
  -1  -2  -2 3600.89 281.712   3
   1   2   2 2829.66 281.761   3
   1  -2   2 3208.09 281.996   3
  -1   2  -2 3616.80 282.214   3
   1  -2   2 2677.04 280.452  14
   1   2   2 2737.35 277.579  15
  -1  -2  -3 2666.11 215.358   4
  -1   2  -3 2098.97 219.372   4
   1  -2   3 2441.53 216.780   9
  -1   2  -3 2187.01 217.158   9
  -1  -2  -3 1980.09 215.502  12
  -1  -2  -3 2544.46 217.082   3
  -1   2  -3 2559.32 217.666   3
   1  -2   3 2088.16 217.046   3
   1   2   3 2100.80 217.239   3
  -1   2  -3 2126.66 215.565   1
   1   2   3 2062.82 212.769  15
   1  -2   4 314.840 33.4981   9
  -1   2  -4 282.656 33.9182   9
   1   2   4 274.848 29.8451  15
  -1   2  -4 272.318 32.7500  15
  -1  -2  -4 363.419 35.4406   3
   1   2   4 267.189 34.5249   3
   1  -2   4 309.514 35.3734   3
   1  -2   4 277.665 32.7213  12
  -1  -2  -4 249.674 32.6832  12
  -1  -2  -4 301.516 30.6464   4
  -1   2  -4 252.254 35.6358   4
   1  -2   5 480.659 43.3134   9
  -1   2  -5 392.729 43.1006   9
  -1   2  -5 430.791 42.3018  15
   1   2   5 321.603 37.7435  15
   1  -2   5 314.296 42.8669   3
   1   2   5 355.429 43.9782   3
  -1  -2  -5 304.462 41.0656  12
  -1   2  -5 372.232 43.9168   4
  -1   2  -6 447.636 48.2765   9
  -1   2  -6 508.831 47.3990  15
   1   2   6 376.403 42.0767  15
   1   2   6 398.635 49.0349   3
   1  -2   6 317.131 47.1005   3
  -1  -2  -6 377.802 46.7890  12
  -1   2  -6 371.246 45.2816   4
   1   2   7 1186.92 135.935   3
   1  -2   7 1202.66 136.385   3
  -1  -2  -7 1331.50 135.417  12
  -1   2  -7 1387.90 133.264  15
  -1   2  -7 1377.23 135.806   9
   1   2   8 2156.51 231.846   3
   1  -2   8 2058.48 231.388   3
  -1  -2  -8 2146.70 229.854  12
  -1   2  -8 2666.42 229.078  15
  -1   2  -8 2341.65 230.559   9
  -1  -2  -8 2313.59 232.083   9
  -1   2  -9 2326.65 198.280  15
   1  -2   9 1635.21 199.473   3
   1   2   9 1644.24 199.330   3
  -1  -2  -9 1863.22 200.666   9
  -1   2  -9 2250.31 201.854   9
   1  -2  10 731.221 105.466   3
   1   2  10 728.544 104.400   3
  -1   2 -10 882.961 105.404   9
  -1  -2 -10 911.437 107.410   9
  -1   2 -10 1017.64 103.843  15
  -1   2 -10 1268.19 116.000  13
  -1  -2 -10 1219.27 113.611  13
  -1   2 -11 788.650 86.0294  13
  -1  -2 -11 781.077 82.3129  13
  -1   2 -11 596.657 74.8229   9
  -1  -2 -11 531.412 73.3110   9
   1  -2  11 445.919 73.0549   3
   1   2  11 364.411 69.7691   3
  -1   2 -11 689.561 73.0456  15
  -1  -2 -12 334.930 56.9191   9
  -1   2 -12 341.248 54.6008   9
   1   3 -13 95.8675 29.7356   9
   1   3 -12 1997.86 170.067  13
   1  -3 -12 2298.12 170.101  13
   1   3 -12 1815.94 160.854   9
   1  -3 -12 1306.58 159.296   9
   1  -3 -12 1317.29 157.018  12
  -1   3  12 1091.92 154.825   3
  -1  -3  12 1131.09 155.581   3
   1   3 -11 410.719 54.9517  15
   1  -3 -11 321.977 52.4807   9
  -1  -3  11 341.204 53.2674   3
   1   3 -11 395.693 52.1545   9
   1   3 -11 471.880 61.1818  13
   1  -3 -11 537.027 60.1092  13
  -1   3  11 244.978 48.2761   3
   1  -3 -11 352.537 52.6622  12
   1  -3 -10 716.573 90.1177   9
   1   3 -10 759.809 86.6926   9
   1   3 -10 1061.50 97.4350  13
   1  -3 -10 947.128 93.2440  13
   1   3 -10 826.447 88.9909  15
  -1  -3  10 720.640 88.5883   3
  -1   3  10 549.348 85.3013   3
   1   3  -9 3.23693 18.4855  13
   1   3  -9 9.93702 12.9565   9
   1   3  -9 5.47101 16.0522  15
   1  -3  -9 8.85540 15.3912  13
  -1  -3   9 3.19441 14.5851   3
  -1   3   9 3.10202 15.0580   3
   1   3  -8 105.694 21.6372  15
   1   3  -8 75.9840 18.1031   9
  -1   3   8 82.6279 19.8801   3
  -1  -3   8 71.0117 20.6106   3
   1  -3  -8 127.126 23.8968  13
   1   3  -8 105.065 23.7693  13
   1  -3  -7 202.389 28.8356  13
   1   3  -7 225.153 30.1363  13
  -1  -3   7 203.229 29.0603   4
   1   3  -7 185.187 25.9443   9
   1   3  -7 202.209 28.0782  15
  -1   3   7 163.594 26.7732   3
  -1  -3   7 134.291 26.3152   3
   1  -3  -7 173.032 27.4895  12
  -1  -3   6 4150.58 405.837   1
  -1  -3   6 4386.27 410.935   4
   1   3  -6 4259.42 405.690   9
   1   3  -6 4485.65 407.043  15
  -1   3   6 3611.85 402.589  15
  -1  -3   6 4332.96 407.252   3
  -1   3   6 3808.23 406.127   3
  -1  -3   6 4725.40 404.737  12
   1  -3  -6 3728.66 406.794  12
   1   3  -6 4568.61 408.230  13
   1  -3  -6 4908.90 408.392  13
  -1  -3   5 1393.64 138.363   1
  -1  -3   5 1409.83 143.520   4
  -1   3   5 1247.64 135.408   4
  -1  -3   5 1527.26 136.888   9
   1   3  -5 1379.77 137.482   9
   1  -3  -5 1389.41 138.305  13
  -1  -3   5 1383.75 138.591   3
  -1   3   5 1265.36 137.772   3
   1  -3  -5 1727.43 139.901   3
  -1  -3   5 1485.80 136.226  12
   1  -3  -5 1390.34 139.653  12
  -1   3   5 1232.21 135.686  15
  -1  -3   4 9182.04 955.050  15
  -1   3   4 9705.55 956.685   3
  -1  -3   4 10792.7 957.404   3
  -1   3   4 8445.65 956.241   4
  -1  -3   4 10326.4 963.051   4
   1   3  -4 10432.7 956.384   9
  -1  -3   4 10789.3 955.613   9
   1   3  -4 10380.7 956.891  13
   1  -3  -4 10061.6 956.590  13
   1   3  -4 9742.20 956.631   3
   1  -3  -4 11614.2 957.514   3
   1  -3  -4 9071.40 957.641  12
  -1  -3   4 10599.7 955.134  12
  -1  -3   3 695.804 74.4566  15
  -1   3   3 751.316 75.2751   3
  -1  -3   3 691.169 75.0467   3
   1   3  -3 761.353 75.2990  13
   1  -3  -3 844.094 75.5799  13
   1  -3  -3 741.965 77.4155  12
  -1   3   3 769.465 74.3577  11
  -1  -3   3 789.767 74.6649  10
  -1   3   3 846.362 74.9468  10
   1   3  -3 780.237 75.7243   9
  -1  -3   3 783.453 74.9709   9
  -1  -3   3 902.985 83.2800   4
  -1   3   3 610.469 76.7759   4
  -1   3   3 706.076 72.4008   2
   1  -3  -2 5520.37 564.907   2
   1  -3  -2 5477.55 569.717  12
  -1   3   2 5957.95 566.772  11
  -1   3   2 6303.79 566.342  10
  -1  -3   2 6408.09 566.179  10
  -1  -3   2 6865.17 568.696   9
  -1  -3   2 6751.11 571.389   8
  -1  -3   2 5516.14 566.742  15
   1   3  -2 6515.63 567.817  15
  -1  -3   2 5935.68 566.898   3
  -1   3   2 5658.24 566.600   3
  -1   3   2 5332.82 570.654   4
  -1  -3   2 7694.88 576.492   4
  -1  -3   1 855.360 76.7290  11
   1  -3  -1 816.273 73.3735  11
   1   3  -1 701.271 70.9920  10
  -1  -3   1 780.155 71.6766  10
   1  -3  -1 722.998 71.0064  10
  -1   3   1 876.759 72.2672  10
  -1  -3   1 668.012 71.1099  13
  -1   3   1 918.253 77.0704  14
  -1   3   1 678.098 71.0795  13
  -1   3   1 669.176 76.6099   8
   1   3  -1 625.126 76.9672   7
  -1  -3   1 821.713 78.3834   8
   1   3  -1 794.972 72.5125  15
  -1   3   1 643.415 77.0098   4
   1   3   0 72.9608 8.90852  15
   1  -3   0 59.1580 11.7508  14
  -1  -3   0 69.1550 9.20337  14
  -1  -3   0 86.1329 10.1676  12
  -1   3   0 72.2487 10.1126   5
  -1  -3   0 74.3334 9.72913   5
  -1  -3   0 102.420 14.4526  11
  -1  -3   0 66.7990 9.27717   2
  -1   3   0 87.0457 10.0217   3
  -1  -3   0 83.7552 9.36298   3
  -1   3   0 52.9652 14.3052   4
   1   3   0 83.9381 11.7700   6
  -1  -3   0 78.2436 12.4971   6
  -1   3   0 64.3861 14.3820   7
   1  -3   0 76.1087 12.5943   8
   1   3   1 305.496 30.8288  14
   1  -3   1 281.543 34.1527  14
  -1  -3  -1 284.693 32.8523  12
   1   3   1 343.027 33.5366  12
   1   3   1 292.526 35.4035  11
   1  -3   1 264.445 33.2046   5
  -1  -3  -1 382.303 38.0297   4
   1   3   1 268.995 33.8842   5
   1  -3   1 366.190 36.9190   9
  -1  -3  -1 323.069 32.2920   3
   1   3   1 291.241 33.5918   3
  -1   3  -1 394.466 33.4130   3
   1  -3   1 318.942 33.3765   3
  -1   3  -1 310.289 35.8511   7
   1  -3   1 326.758 36.8143   7
   1   3   1 301.871 36.0272   6
   1  -3   2 5349.56 522.596  14
   1   3   2 5703.82 521.972  12
  -1  -3  -2 5323.76 521.982  12
   1   3   2 5863.31 525.534  11
  -1   3  -2 4718.08 527.061   4
  -1  -3  -2 6365.59 526.191   4
  -1   3  -2 5313.49 524.209   9
   1  -3   2 5979.63 524.658   9
   1   3   2 5590.09 523.167   3
  -1  -3  -2 5754.67 521.406   3
  -1   3  -2 6347.55 522.350   3
   1  -3   2 5568.34 522.563   3
   1  -3   2 6128.44 524.239   7
  -1   3  -2 4635.44 522.297   1
   1   3   2 5317.37 519.655   2
   1   3   2 5181.64 518.535  15
  -1  -3  -3 1596.14 166.538  12
  -1  -3  -3 1872.12 168.608   4
  -1   3  -3 1455.10 171.344   4
   1  -3   3 1874.48 167.963   9
  -1   3  -3 1667.07 168.340   9
  -1   3  -3 1511.86 166.621   1
   1  -3   3 1587.40 167.157   3
   1   3   3 1668.95 167.745   3
  -1  -3  -3 2152.57 167.614   3
  -1   3  -3 2294.05 168.930   3
   1   3   3 1595.07 162.578  15
   1  -3   3 1604.38 166.167  14
  -1   3  -4 5841.31 592.400   4
  -1  -3  -4 6920.47 587.894   4
   1   3   4 5544.56 588.242   3
   1  -3   4 6188.03 588.807   3
  -1  -3  -4 7905.38 589.038   3
   1  -3   4 7006.87 588.451   9
  -1   3  -4 6052.55 589.258   9
  -1  -3  -4 5351.90 586.924  12
   1   3   4 6701.91 587.089  12
   1   3   4 5495.70 582.784  15
  -1  -3  -5 713.900 59.4189   4
  -1   3  -5 534.381 66.1441   4
   1   3   5 593.208 64.4532   3
   1  -3   5 557.424 63.6490   3
  -1   3  -5 578.598 63.8069   9
  -1  -3  -5 519.223 62.1801  12
   1   3   5 495.364 57.0299  15
  -1   3  -5 641.500 63.1136  15
  -1   3  -6 3046.00 306.186   4
  -1   3  -6 3391.97 307.063   9
  -1  -3  -6 3013.61 305.218  12
  -1   3  -6 3788.90 306.084  15
   1   3   6 2836.44 298.618  15
   1   3   6 3120.75 307.144   3
   1  -3   6 3214.14 307.326   3
  -1   3  -7 753.260 73.8829   9
  -1  -3  -7 569.632 70.8662  12
  -1   3  -7 791.999 72.2427  15
   1   3   7 583.417 64.1836  15
   1   3   7 571.013 71.7156   3
   1  -3   7 588.061 72.1395   3
  -1   3  -8 349.419 43.8653   9
   1   3   8 279.794 43.1417   3
   1  -3   8 268.323 42.2004   3
  -1  -3  -8 234.916 40.2071  12
  -1   3  -8 395.725 43.9295  15
  -1   3  -9 51.2906 20.2527  15
  -1  -3  -9 50.2615 21.4608   9
  -1  -3  -9 52.1600 19.3364  12
   1  -3   9 41.1147 22.5416   3
   1   3   9 63.3394 22.4740   3
  -1   3  -9 77.7886 22.4471   9
  -1   3 -10 532.199 74.4025   9
  -1  -3 -10 565.915 76.8395   9
   1   3  10 425.818 72.8521   3
   1  -3  10 496.857 75.1450   3
  -1   3 -10 729.625 75.8469  15
  -1   3 -10 895.101 86.0811  13
  -1  -3 -10 863.409 82.4258  13
  -1   3 -11-4.30272 22.5744   9
  -1  -3 -11 82.7649 30.6097  13
  -1   3 -11 18.9661 31.6867  13
  -1  -3 -11 19.1767 22.0312   9
   1  -3  11 51.6784 26.5730   3
   1   3  11 18.5126 24.6561   3
  -1   3 -11 34.7371 24.4271  15
  -1   3 -12 1226.65 127.060  15
  -1   3 -12 1002.12 127.470   9
  -1   4  12-8.42328 22.3104   3
  -1  -4  12 8.93197 21.6660   3
   1   4 -12 7.99279 26.0671  15
   1   4 -12-3.73788 20.7368   9
   1  -4 -12-14.7927 24.8244   9
   1  -4 -12 20.4995 27.8569  13
   1   4 -12 28.4425 30.5893  13
  -1  -4  11 613.986 88.4360   3
  -1   4  11 573.122 86.3970   3
   1   4 -11 1037.75 96.1367  15
   1  -4 -11 622.825 90.6643   9
   1   4 -11 825.800 89.9758   9
   1  -4 -11 885.063 93.3025  13
   1   4 -11 973.223 97.5533  13
   1   4 -10 18.0442 17.7625   9
   1  -4 -10 36.1167 22.8041  13
   1   4 -10 85.2548 29.0843  13
   1   4 -10 50.7379 23.9136  15
  -1  -4  10 35.5043 19.7267   3
  -1   4  10 33.9754 21.0001   3
   1   4  -9 2373.82 237.601   9
   1  -4  -9 1994.33 237.531  12
  -1   4   9 1977.66 236.993   3
  -1  -4   9 2107.38 238.350   3
   1   4  -9 2895.20 241.988  15
   1  -4  -9 2917.77 242.019  13
   1   4  -9 2752.18 242.849  13
   1   4  -8 231.133 35.3723   9
   1  -4  -8 210.877 36.0354  12
  -1   4   8 291.580 38.1220   3
  -1  -4   8 234.791 36.9802   3
   1   4  -8 308.273 39.6283  15
   1  -4  -8 308.969 39.5497  13
   1   4  -8 304.231 39.8875  13
   1  -4  -7 3967.70 438.263  12
  -1  -4   7 4276.93 437.089   1
  -1  -4   7 4394.54 441.812   4
   1   4  -7 4819.57 437.829   9
  -1  -4   7 4056.52 437.360   3
  -1   4   7 3982.64 436.927   3
   1   4  -7 5037.10 440.032  13
   1  -4  -7 5309.04 439.580  13
   1   4  -7 5151.34 439.713  15
  -1  -4   6 20.9878 8.75093  12
   1  -4  -6-3.45418 9.33264  13
   1  -4  -6-2.20361 9.17671  12
  -1   4   6 9.13793 9.87148   3
  -1  -4   6 22.2945 11.3490   3
  -1  -4   6 11.5650 10.0791   1
   1   4  -6 11.9264 9.20769   9
  -1  -4   6 9.42455 14.3585   4
  -1  -4   6 9.68442 8.26240   9
  -1   4   6 9.10347 7.99947  15
   1   4  -6 3.71352 10.7779  13
   1  -4  -5 485.728 48.8483  13
   1  -4  -5 381.417 49.5329  12
  -1  -4   5 454.157 47.1194  12
  -1  -4   5 426.759 50.1202   1
  -1  -4   5 453.352 56.0084   4
  -1   4   5 452.034 48.3443   4
   1   4  -5 412.171 48.0554   9
  -1  -4   5 473.080 47.6197   9
  -1  -4   5 452.963 48.6134   3
  -1   4   5 387.765 47.7086   3
  -1   4   5 426.325 43.4621   2
   1  -4  -5 473.767 48.8623   3
  -1   4   4 8.99917 2.75586   2
  -1  -4   4 9.15817 6.70413  15
   1   4  -4 5.41713 6.76152  15
  -1  -4   4 3.26730 6.28850   9
  -1  -4   4 21.8453 9.50555   7
   1  -4  -4 14.0514 8.24102  12
  -1  -4   4 20.0030 6.26368  10
  -1   4   4 8.76221 5.91154  10
  -1   4   4 9.77441 5.80995  11
  -1   4   4 8.03318 5.85423   3
  -1  -4   4 6.98802 6.89574   3
   1  -4  -4 13.1035 7.10926  13
   1   4  -4 13.6401 6.28392  13
  -1  -4   4 9.06216 10.0005   4
  -1   4   4 10.4465 8.65914   4
   1   4  -3 1101.30 113.380  13
   1  -4  -3 1145.61 113.340  13
   1  -4  -3 1053.03 116.441  12
  -1   4   3 1152.07 113.486  11
  -1   4   3 1256.89 112.922  10
  -1  -4   3 1291.41 112.720  10
  -1  -4   3 1343.70 115.963   9
  -1  -4   3 1258.72 113.964   3
  -1   4   3 1146.03 113.519   3
  -1  -4   3 1115.00 122.507   4
  -1   4   3 891.160 116.664   4
  -1  -4   3 986.299 113.146  15
  -1   4   2 114.983 12.7169   6
  -1   4   2 70.7492 11.4163  11
  -1  -4   2 75.5080 9.90899  10
  -1   4   2 77.6072 10.1902  10
   1  -4  -2 90.3585 13.4483  11
  -1  -4   2 96.2554 14.7897   9
  -1   4   2 62.7256 17.2782   8
   1   4  -2 73.3819 11.8294  15
  -1   4   2 79.8743 10.3842   3
  -1  -4   2 81.8757 10.5753   3
  -1   4   2 58.3970 14.7207   4
   1   4  -1 8375.05 911.833  11
  -1  -4   1 11045.0 913.091  11
   1  -4  -1 10414.2 909.589  11
  -1   4   1 7920.17 913.581   4
  -1   4   1 9418.28 905.678   3
  -1  -4   1 9893.38 905.784   3
   1   4  -1 10507.0 908.251  15
   1   4  -1 6401.74 912.972   7
  -1   4   1 9276.60 913.787   8
  -1  -4   1 10593.9 915.901   8
  -1   4   1 11069.3 911.974  14
  -1  -4   1 8975.05 907.535  14
  -1   4   1 9476.22 905.443  13
  -1  -4   1 9660.04 909.291   6
  -1  -4   0 36.8935 6.13427   2
   1   4   0 37.3926 6.06370  15
   1  -4   0 25.5886 9.97024   8
  -1   4   0 36.6067 5.02514   3
  -1  -4   0 14.8706 5.43511  14
   1  -4   0 16.5745 8.04678  14
  -1   4   0 54.0597 10.3954  14
   1   4   0 6.69883 9.92990   7
  -1   4   0 36.6133 13.1283   7
  -1  -4   0 32.7506 9.28057   6
  -1  -4   0 32.3085 6.71579  12
   1  -4   0 42.2254 9.02693  11
   1   4   0 14.8323 7.82912  11
   1  -4   0 27.2763 4.16043  10
   1   4   0 28.6186 4.64843  10
  -1  -4   0 28.4007 9.63538  11
  -1   4   0 31.5227 12.9182   4
  -1  -4   0 25.0860 4.35095   3
   1  -4   1 7501.13 825.880  14
  -1  -4  -1 7850.77 824.666  12
   1   4   1 9162.58 828.247  11
  -1  -4  -1 10493.4 833.547   4
   1   4   1 7341.25 824.907   5
   1  -4   1 10414.6 831.204   9
  -1   4  -1 7374.70 829.034   7
   1  -4   1 9287.07 827.476   8
  -1  -4  -1 9595.54 822.722   3
  -1   4  -1 9693.67 823.222   3
   1  -4   1 7232.39 823.747   5
   1   4   1 8689.63 826.969   6
  -1  -4  -1 8735.69 823.080   2
   1  -4   1 9125.44 827.328   1
   1   4   2 52.1804 7.54661  14
   1  -4   2 39.2871 10.3189  14
   1  -4   2 60.1751 13.7137   7
   1   4   2 21.5603 11.9099   6
  -1  -4  -2 72.8596 10.8920  12
   1   4   2 57.5098 11.2273  12
   1   4   2 43.8012 11.2415  11
   1  -4   2 67.5459 13.4572   9
  -1   4  -2 33.8476 16.1638   4
  -1  -4  -2 39.2498 13.0363   4
  -1   4  -2 46.1661 9.36940   3
   1  -4   2 45.2691 9.74998   3
  -1  -4  -2 60.6789 9.33032   3
   1   4   2 71.1817 11.4292   3
   1  -4   3 3625.51 415.185  14
  -1  -4  -3 3743.37 415.665  12
   1   4   3 4276.93 419.380  11
   1   4   3 4189.83 411.507   2
  -1   4  -3 4284.42 418.791   9
   1  -4   3 5135.53 419.162   9
   1  -4   3 4466.14 416.576   3
  -1   4  -3 5382.30 416.764   3
  -1  -4  -3 5394.85 415.980   3
   1   4   3 4653.78 417.516   3
   1  -4   3 4834.53 418.723   7
   1   4   3 3958.98 411.357  15
  -1  -4  -3 4829.51 421.358   4
  -1   4  -3 4078.01 423.382   4
  -1  -4  -4 4.97245 6.40422  12
  -1   4  -4 31.2296 16.5802   4
   1  -4   4 9.84224 8.33220   3
   1   4   4 23.0531 10.3221   3
  -1  -4  -4 11.6862 8.97698   3
  -1   4  -4 7.98775 8.77662   9
  -1  -4  -4 13.7736 10.1420   4
   1  -4   4 17.9322 9.11132   9
   1  -4   4 12.7719 8.79552   7
   1   4   4 10.8130 4.33947  15
  -1   4  -4 12.3084 9.67376  15
  -1   4  -5 392.494 48.6126   9
  -1   4  -5 384.389 52.7466   4
  -1  -4  -5 474.379 47.3184   4
   1   4   5 399.961 48.3028   3
   1  -4   5 444.914 49.0336   3
  -1  -4  -5 390.857 47.7072  12
  -1   4  -5 483.375 49.6076  15
   1   4   5 373.935 41.3827  15
  -1   4  -6 75.2090 17.8959   9
   1   4   6 59.2754 10.9150  15
  -1   4  -6 95.8353 18.7266  15
   1  -4   6 114.187 20.2566   3
   1   4   6 47.1615 16.4366   3
  -1  -4  -6 60.6306 16.2838  12
   1   4   7 2931.44 258.979   3
   1  -4   7 2610.27 257.111   3
  -1  -4  -7 2437.52 255.645  12
  -1   4  -7 2860.90 258.456   9
   1   4   7 2211.84 247.183  15
  -1   4  -8 6.37261 15.5079   9
  -1   4  -8 21.5818 18.0098  15
  -1  -4  -8 9.18537 14.0260  12
   1  -4   8 6.44271 15.3749   3
   1   4   8 26.0825 15.8658   3
  -1   4  -9 3216.16 275.492  15
   1  -4   9 2346.93 273.687   3
   1   4   9 2182.05 272.579   3
  -1  -4  -9 2383.15 273.320  12
  -1  -4  -9 3081.33 276.195  13
  -1   4  -9 3486.97 281.781  13
  -1   4  -9 2862.13 276.640   9
  -1   4 -10 58.6061 27.3329  13
  -1  -4 -10-3.53989 23.3668  13
  -1   4 -10 36.6958 22.9212  15
  -1  -4 -10 13.7147 22.2129   9
   1  -4  10 12.4474 21.6576   3
   1   4  10-4.09638 19.9117   3
  -1  -4 -10 3.80023 17.3844  12
  -1   4 -10 19.8051 22.0096   9
   1   4  11 834.052 110.705   3
   1  -4  11 763.709 110.593   3
  -1   4 -11 1376.37 123.252  13
  -1  -4 -11 1238.62 116.357  13
  -1  -4 -11 657.010 109.145   9
  -1   4 -11 960.056 113.372   9
  -1   4 -11 1290.38 116.088  15
  -1   4 -12 4.71555 24.9836   9
   1   5 -12 1522.31 127.082  13
   1  -5 -12 1327.88 120.674  13
  -1   5  12 809.864 110.700   3
  -1  -5  12 714.227 110.219   3
   1   5 -11 132.476 31.8024   9
  -1   5  11 99.8472 28.3058   3
  -1  -5  11 132.353 31.0934   3
   1   5 -11 125.311 36.4142  15
   1  -5 -11 175.235 35.3146  13
   1  -5 -11 136.589 32.5108  12
   1   5 -11 151.612 37.6696  13
   1   5 -10 373.707 52.7688   9
   1   5 -10 577.268 61.8431  13
   1  -5 -10 434.563 56.0894  13
  -1   5  10 366.009 53.5856   3
  -1  -5  10 341.031 53.1721   3
   1  -5 -10 362.438 54.5169  12
   1   5 -10 493.981 60.3264  15
   1   5  -9 341.859 42.4965  15
   1  -5  -9 307.280 38.7513  13
   1   5  -9 224.926 34.6933   9
   1   5  -9 261.535 38.8123  13
   1  -5  -9 181.496 35.1632  12
  -1   5   9 131.726 31.6233   3
  -1  -5   9 184.657 35.0886   3
  -1   5   8 200.857 23.6100   2
  -1  -5   8 203.021 31.8270   3
  -1   5   8 177.623 30.6941   3
   1   5  -8 200.952 31.6604   9
  -1  -5   8 248.614 33.9927   1
  -1  -5   8 176.000 35.9656   4
   1  -5  -8 318.989 38.3966  12
   1  -5  -8 199.349 32.1486  13
   1   5  -8 238.673 34.8010  13
   1   5  -8 227.983 35.9296  15
   1  -5  -7 129.625 25.4420  12
   1   5  -7 197.604 26.8453  13
  -1  -5   7 180.285 32.8591   4
  -1  -5   7 159.868 25.3747   1
  -1   5   7 73.0157 19.3252  11
   1   5  -7 177.395 25.7847   9
   1  -5  -7 197.752 26.2707  13
  -1   5   7 152.981 16.5110   2
  -1  -5   7 149.359 24.5671   3
  -1   5   7 119.124 24.3899   3
   1  -5  -6 2598.46 211.420  13
   1   5  -6 2616.23 212.355  13
  -1  -5   6 2448.64 209.270  12
   1  -5  -6 2205.46 213.696  12
  -1   5   6 2126.36 208.086  11
  -1  -5   6 2382.89 222.318   4
  -1  -5   6 2548.42 210.155   9
   1   5  -6 2174.97 211.165   9
  -1  -5   6 2394.55 214.188   1
  -1  -5   6 2208.69 210.938   3
  -1   5   6 2089.00 210.138   3
  -1   5   6 1894.50 206.904  15
  -1   5   6 1880.20 202.694   2
   1  -5  -5 272.731 29.8405  13
   1  -5  -5 220.521 31.8781  12
  -1  -5   5 279.049 29.2646  12
  -1   5   5 204.601 27.2602  11
  -1  -5   5 187.112 26.6310  10
  -1   5   5 272.241 28.3384  10
  -1  -5   5 237.864 29.2145   9
   1   5  -5 254.920 31.5168  15
  -1   5   5 233.744 29.1576   3
  -1  -5   5 233.928 29.2999   3
  -1  -5   5 241.118 39.0360   4
  -1   5   5 198.318 29.5497   4
  -1  -5   5 230.036 32.6774   1
   1   5  -4 4841.09 476.933  13
   1  -5  -4 5067.57 477.008  13
   1  -5  -4 4039.18 479.930  12
  -1   5   4 5204.08 477.114  11
  -1   5   4 4451.82 481.281   4
  -1  -5   4 5565.62 491.521   4
  -1   5   4 5346.62 476.149  10
  -1  -5   4 5378.24 475.914  10
  -1  -5   4 5670.39 479.412   9
  -1  -5   4 4587.12 476.607   3
  -1   5   4 4434.08 476.626   3
   1   5  -4 5360.14 480.060  15
  -1  -5   4 5020.80 482.964   1
   1  -5  -3 2166.09 233.420  12
  -1   5   3 2313.00 230.429  11
  -1   5   3 2465.74 228.261  10
  -1  -5   3 2659.31 228.085  10
  -1  -5   3 2808.65 234.112   9
  -1   5   3 2346.57 230.384   6
  -1   5   3 2008.15 228.214   3
  -1  -5   3 2520.81 229.016   3
  -1   5   3 1830.59 233.969   4
  -1  -5   3 2790.08 244.620   4
  -1   5   2 3402.85 365.963   8
  -1  -5   2 4417.36 365.694   8
  -1  -5   2 3686.73 354.954   3
  -1   5   2 3606.44 354.861   3
  -1   5   2 4094.01 355.416  10
  -1  -5   2 3372.00 354.824  10
  -1  -5   2 4694.27 363.529   9
  -1  -5   2 3334.82 356.876  14
  -1   5   2 4430.59 361.548  14
  -1  -5   2 4250.76 363.539  11
   1  -5  -2 4049.44 360.055  11
  -1   5   2 2896.91 362.581   4
  -1   5   1 514.935 80.8519   4
  -1   5   1 933.661 80.3378  14
  -1  -5   1 640.385 75.1669  14
  -1  -5   1 842.192 77.8855   6
  -1  -5   1 862.441 85.3064   8
   1   5  -1 459.144 81.4818   7
   1   5  -1 689.476 82.8222   8
  -1   5   1 799.225 82.9895   8
   1   5  -1 806.107 76.1362  15
   1  -5  -1 878.780 78.3521  11
  -1  -5   1 894.585 81.5801  11
   1   5   0 9.60154 5.08461  15
  -1  -5   0 13.4199 6.15762  14
   1  -5   0 1.91086 9.20772  14
  -1   5   0 10.5241 12.1230   7
   1   5   0 4.07902 9.61863   7
  -1  -5   0 6.62494 7.19812   6
   1  -5   0 28.9268 4.89204   6
   1   5   0 9.92662 9.74248  11
  -1  -5   0 5.32572 5.91733  12
  -1  -5   0 13.0356 9.81455  11
   1   5   0 3.22069 9.30898   8
   1  -5   0 22.3946 11.9534   8
  -1   5   0 2.92225 10.5058   4
  -1  -5   0 33.0372 6.14354   2
   1  -5   1 198.802 28.0278  14
  -1  -5  -1 187.042 26.1041  12
   1  -5   1 245.266 28.9768  11
  -1  -5  -1 272.321 33.2906  11
   1   5   1 192.419 29.0508  11
  -1  -5  -1 217.127 24.0326   2
   1  -5   1 276.465 33.3936   9
  -1  -5  -1 229.475 23.2254   3
  -1   5  -1 244.826 23.6894   3
   1   5   1 209.712 35.7223   8
   1  -5   1 247.583 30.7765   8
  -1   5  -1 182.397 31.4671   7
   1   5   1 221.216 26.9631   6
  -1   5  -2 2566.63 213.800  15
   1   5   2 2128.82 223.376   8
   1  -5   2 2224.23 212.100   8
   1   5   2 2282.67 206.894  14
   1  -5   2 1912.17 210.395  14
   1   5   2 2241.77 212.871  11
   1  -5   2 2357.11 220.515   4
   1  -5   2 1887.41 208.611   5
   1   5   2 1914.79 210.062   5
   1  -5   2 2698.29 216.606   9
   1   5   2 1930.14 211.363   6
  -1  -5  -2 2413.16 207.469   3
  -1   5  -2 2345.28 207.905   3
   1   5   2 2109.95 209.804   3
   1  -5   2 1950.80 208.453   3
  -1  -5  -2 1810.06 209.329  12
   1  -5   2 2202.65 212.503   1
   1   5   3 1542.28 147.283  11
   1   5   3 1585.85 140.961  14
   1  -5   3 1754.82 149.119   9
   1  -5   3 1323.07 147.219   7
   1   5   3 1185.28 147.001   6
  -1  -5  -3 1124.95 143.479  12
  -1  -5  -3 1591.47 142.495   3
  -1   5  -3 1601.17 143.219   3
   1   5   3 1443.80 144.739   3
   1  -5   3 1288.69 143.199   3
  -1  -5  -4 6284.12 471.359   4
   1   5   4 4340.95 457.246  15
   1   5   4 5151.49 464.767   3
   1  -5   4 4566.85 462.828   3
  -1  -5  -4 6041.30 462.874   3
  -1  -5  -4 4379.87 463.599  12
   1   5   4 5189.21 466.345  11
   1   5   5 812.017 89.1465  11
   1   5   5 814.413 80.1916   2
  -1  -5  -5 1030.30 90.8800   4
  -1   5  -5 1005.88 91.9129   9
   1   5   5 750.508 80.1357  15
  -1   5  -5 753.201 88.1967  15
   1  -5   5 804.134 87.0338   3
   1   5   5 955.300 89.5050   3
  -1  -5  -5 835.771 88.2576  12
  -1   5  -6 2060.46 188.723   9
   1  -5   6 1889.29 185.711   3
   1   5   6 1887.74 186.346   3
  -1   5  -6 2439.41 190.049  15
   1   5   6 1663.07 176.892  15
  -1  -5  -6 1824.32 185.758  12
  -1   5  -7 205.962 32.3175   9
   1   5   7 196.318 31.9072   3
   1  -5   7 196.963 30.8264   3
   1   5   7 142.485 21.7051  15
  -1  -5  -7 206.006 31.3511  12
  -1   5  -8 308.361 48.1889   9
  -1  -5  -8 413.593 48.8862  13
   1   5   8 310.358 47.5955   3
   1  -5   8 284.793 47.0926   3
  -1   5  -8 428.223 51.1058  15
  -1  -5  -8 302.424 47.4257  12
  -1   5  -9 3.31955 20.2451  15
  -1   5  -9 3.57911 21.8248  13
  -1  -5  -9 32.7713 21.7927  13
   1   5   9 7.25197 17.6163   3
   1  -5   9 28.8560 19.1308   3
  -1   5  -9-3.59206 17.7835   9
  -1  -5  -9 14.4564 20.9373  12
  -1   5 -10 411.529 53.7109  15
  -1  -5 -10 436.656 52.9201  13
  -1   5 -10 430.131 55.8522  13
   1   5  10 312.414 50.5158   3
   1  -5  10 261.570 48.1440   3
  -1   5 -10 287.827 48.5925   9
  -1  -5 -10 230.505 46.7310  12
  -1   5 -11 578.822 70.9708  13
  -1  -5 -11 519.652 63.5043  13
  -1   5 -11 562.802 67.2253  15
   1  -5  11 291.796 58.2957   3
   1   5  11 380.085 61.5431   3
  -1   5 -11 350.954 59.8651   9
  -1   5 -12 667.823 88.1442   9
   1   6 -12 38.8361 32.6668  13
   1  -6 -12 75.5240 30.1976  13
  -1  -6  12 41.6905 24.5811   3
  -1   6  12 46.5823 26.0160   3
  -1  -6  11 194.681 39.6002   3
  -1   6  11 268.892 41.8514   3
   1   6 -11 222.464 40.3510   9
   1   6 -11 213.166 46.6088  15
   1   6 -11 341.983 50.2363  13
   1  -6 -11 206.330 42.5650  12
   1  -6 -11 305.305 45.2728  13
   1   6 -10 491.032 59.2408  15
   1   6 -10 309.573 47.7631   9
   1  -6 -10 447.270 52.0279  13
   1   6 -10 445.524 53.7390  13
  -1  -6  10 317.002 48.6494   3
  -1   6  10 249.472 45.0990   3
   1  -6 -10 250.922 47.2860  12
   1   6  -9 1066.72 108.814   9
  -1   6   9 850.025 100.567  11
  -1  -6   9 989.716 107.811   3
  -1   6   9 918.890 105.985   3
   1  -6  -9 1207.95 109.091  13
   1   6  -9 1222.40 111.676  13
   1  -6  -9 853.090 108.080  12
  -1  -6   8 2122.41 207.264   1
  -1   6   8 1874.82 203.369   3
  -1  -6   8 1980.49 204.287   3
  -1   6   8 1924.56 199.608  11
   1   6  -8 2485.13 207.898  13
   1  -6  -8 2478.65 205.774  13
   1  -6  -8 1599.82 204.895  12
   1  -6  -7 749.549 103.307  12
  -1  -6   7 1145.82 115.129   4
  -1  -6   7 972.893 102.008   3
  -1   6   7 863.381 100.850   3
  -1   6   7 933.642 98.4450  11
   1   6  -7 1029.96 105.536  15
   1   6  -7 1100.85 103.616  13
   1  -6  -7 1123.88 102.791  13
  -1  -6   7 940.252 104.627   1
   1  -6  -6 528.729 66.2313  12
  -1   6   6 495.762 59.5201  11
  -1  -6   6 711.793 77.8121   4
  -1  -6   6 590.591 62.7079   3
  -1   6   6 530.065 62.2424   3
  -1   6   6 473.882 59.5044  15
   1   6  -6 709.165 68.0131  15
  -1  -6   6 687.001 69.3165   1
   1   6  -6 672.000 63.8149  13
   1  -6  -6 603.480 62.6555  13
   1   6  -5 16.3072 12.4264  15
  -1  -6   5 8.33987 8.55811   9
  -1   6   5 1.45166 8.06624   3
  -1  -6   5 4.25423 8.43799   3
   1  -6  -5 6.47185 8.45497  13
  -1   6   5 1.30207 7.34309  11
   1  -6  -5 4.78292 9.39232  12
  -1   6   5 10.6655 11.6674   4
  -1  -6   5 2.91838 7.30192  10
  -1  -6   5-4.33748 18.9167   4
  -1  -6   5 7.99607 13.1847   1
   1   6  -4 18.0826 12.2059  15
  -1   6   4 22.0617 11.4799   6
  -1   6   4 5.53151 6.73107   3
  -1  -6   4 4.28431 6.98291   3
   1  -6  -4 20.1715 11.5264  12
  -1   6   4 10.6377 7.65578  11
  -1   6   4 11.1415 6.50147  10
  -1  -6   4 8.82108 5.93560  10
  -1  -6   4 8.87362 9.30184   9
  -1   6   4 5.03904 11.2876   4
  -1  -6   4 8.05796 12.5589   1
  -1   6   3 317.685 37.1279   6
   1  -6  -3 295.641 42.5283  12
  -1   6   3 345.784 40.7166  11
  -1  -6   3 424.538 37.5419  10
  -1   6   3 422.044 38.2195  10
  -1  -6   3 466.517 46.0055   9
  -1  -6   3 344.655 37.7821   3
  -1   6   3 324.759 37.7233   3
  -1   6   3 319.910 49.1230   8
  -1  -6   3 436.933 55.1207   4
   1   6  -3 354.131 41.8619  15
   1  -6  -2 1851.31 198.641  12
   1  -6  -2 2398.43 199.052  11
  -1  -6   2 2299.05 211.039   4
  -1   6   2 2169.79 191.056   3
  -1  -6   2 2028.70 190.946   3
  -1  -6   2 1722.51 194.161  14
   1  -6  -2 1880.84 190.590   2
  -1   6   2 1938.42 204.767   8
  -1  -6   1 2568.23 302.903  14
  -1  -6   1 2945.85 304.974   6
  -1   6   1 3192.68 311.652   8
   1   6  -1 3493.07 304.375  15
  -1  -6   1 3548.72 309.500  11
   1  -6  -1 3724.47 307.153  11
   1   6   0 3363.32 254.438  15
   1  -6   0 3628.31 267.329   8
   1   6   0 2986.77 268.320   8
  -1  -6   0 1878.93 253.511  14
  -1  -6   0 2859.49 255.561  12
   1  -6   0 3603.32 259.522  11
   1   6   0 3270.34 262.633  11
  -1  -6   0 4010.68 264.292  11
  -1  -6   0 3453.09 271.679   4
  -1  -6   0 3240.45 253.312   2
   1   6   0 2081.92 267.111   7
   1  -6   0 3026.42 252.064   6
  -1  -6   0 3548.90 261.122   6
  -1   6   0 2622.52 268.338   7
   1   6   1 1773.25 135.661  15
   1   6   1 1416.18 150.841   8
  -1   6  -1 1178.01 145.200   7
   1  -6   1 1728.42 144.773   8
   1  -6   1 1671.79 143.086   1
  -1   6  -1 1359.13 132.000  13
  -1  -6  -1 1385.14 137.669  12
   1   6   1 1655.84 143.676  11
   1  -6   1 1863.01 142.139  11
  -1  -6  -1 2107.23 148.439  11
   1   6   1 1566.64 132.758  10
   1  -6   1 1139.76 131.873  10
  -1   6  -1 1205.83 131.839   3
  -1  -6  -1 1904.15 153.260   4
   1  -6   1 1517.50 150.048   4
  -1  -6  -1 1478.62 133.820   2
  -1  -6  -2 1887.19 200.311  12
   1   6   2 2091.85 203.631  11
  -1  -6  -2 2360.76 212.541   4
  -1   6  -2 2056.13 196.341   3
  -1  -6  -2 2218.38 196.291   3
   1  -6   2 2230.08 204.487   1
   1  -6   2 2159.39 203.955   8
   1   6   2 1983.34 214.339   8
  -1   6  -2 2378.16 204.019  15
   1   6   2 2017.99 200.292   6
   1   6   2 1953.27 199.498   5
   1  -6   2 1675.35 196.930   5
  -1  -6  -3 604.408 69.0170  12
   1   6   3 616.866 69.9786  11
   1   6   3 731.126 64.4269  14
   1  -6   3 630.158 71.2928   1
  -1   6  -3 799.849 73.5785  15
   1  -6   3 531.754 66.0083   3
  -1  -6  -3 754.465 65.8672   3
  -1   6  -3 716.673 66.1075   3
   1   6   3 633.693 68.4605   3
   1   6   3 530.364 68.9495   6
   1   6   3 553.829 68.6252   5
   1  -6   3 513.460 66.3197   5
  -1  -6  -3 753.686 78.2903   4
  -1  -6  -4 65.0282 16.9976  12
   1  -6   4 71.8457 16.0969   5
   1   6   4 95.8350 18.5222  11
   1   6   4 107.802 13.0585  14
   1   6   4 137.625 26.1578   6
  -1  -6  -4 145.262 26.5203   4
   1  -6   4 96.3155 16.7876   3
   1   6   4 86.3979 17.5396   3
  -1  -6  -4 104.305 16.2717   3
   1   6   4 75.7647 11.2375  15
  -1   6  -4 92.2459 20.1069  15
  -1  -6  -5 92.2260 18.4465  12
   1   6   5 53.5783 9.18452  15
   1   6   5 85.3550 17.6995   3
   1  -6   5 60.6399 15.9657   3
   1   6   5 86.1952 17.5284  11
   1   6   6 948.100 105.500  15
   1   6   6 1220.68 116.123   3
   1  -6   6 1164.37 114.725   3
  -1  -6  -6 1060.25 115.413  12
   1   6   6 1209.29 115.567  11
  -1   6  -7 481.853 51.2493  13
  -1  -6  -7 393.440 47.2905  13
  -1   6  -7 277.439 48.6165   9
  -1   6  -7 420.161 51.8505  15
   1   6   7 373.316 50.0489   3
   1  -6   7 402.978 49.4883   3
  -1  -6  -7 351.043 49.0692  12
   1   6   7 329.159 46.7560  11
  -1  -6  -8 821.228 74.7475  13
  -1   6  -8 858.753 78.3802  13
  -1   6  -8 640.779 76.3100   9
  -1   6  -8 772.820 78.2814  15
   1   6   8 622.655 74.3936   3
   1  -6   8 491.090 71.4250   3
  -1  -6  -8 489.824 71.7256  12
   1   6   8 483.388 70.1175  11
  -1  -6  -9 1136.97 95.2822  13
  -1   6  -9 1082.99 98.4392  13
  -1   6  -9 888.000 96.4221   9
  -1   6  -9 1055.15 99.8692  15
   1   6   9 789.252 93.0600   3
   1  -6   9 778.998 92.5979   3
  -1  -6  -9 736.328 93.0636  12
   1   6   9 466.736 85.3809  11
  -1   6 -10 727.353 92.6325   9
  -1   6 -10 1034.30 98.5711  15
   1  -6  10 656.270 90.0091   3
   1   6  10 566.397 87.4389   3
  -1  -6 -10 618.186 89.5581  12
  -1  -6 -10 887.155 90.3487  13
  -1   6 -10 1055.38 97.9426  13
   1  -6  11 325.186 51.5655   3
   1   6  11 156.345 42.9866   3
  -1   6 -11 297.952 49.5695   9
  -1  -6 -11 323.859 48.6382  13
  -1   6 -11 339.164 53.7309  13
  -1   7  11 246.555 43.9279   3
  -1  -7  11 263.007 45.2296   3
   1   7 -11 308.326 49.4508  13
   1  -7 -11 355.136 48.1693  13
  -1   7  10 30.5210 18.9679   3
  -1  -7  10 9.45764 17.9025   3
   1   7 -10 19.2035 21.8754  13
   1  -7 -10 27.4855 21.5360  13
   1  -7 -10 47.4789 23.3260  12
   1   7  -9 110.294 32.9519  15
   1   7  -9 97.0566 27.1452  13
   1  -7  -9 91.3084 27.1034  12
   1  -7  -9 99.9243 24.5783  13
  -1   7   9 78.7892 23.3148   3
  -1  -7   9 107.962 24.9724   3
  -1   7   8 9.52747 13.2142   3
  -1  -7   8-4.77500 13.2455   3
   1   7  -8 16.4332 20.9767  15
   1  -7  -8-10.1749 15.4758  12
   1   7  -8 7.07488 15.7064  13
   1  -7  -8-6.35958 15.8812  13
  -1  -7   8 3.19329 17.4532   1
  -1   7   8 1.44403 9.90769  11
  -1   7   7 658.211 67.4295  11
  -1  -7   7 728.825 85.9213   4
   1   7  -7 592.504 69.6728  13
   1  -7  -7 652.994 69.8612  13
  -1   7   7 563.243 69.1641   3
  -1  -7   7 566.312 69.0707   3
   1  -7  -7 586.131 74.2244  12
   1   7  -7 801.984 77.6352  15
  -1  -7   7 737.429 76.8866   1
  -1   7   6 424.790 44.1464  11
  -1  -7   6 468.363 62.3038   4
   1   7  -6 429.973 45.8100  13
   1  -7  -6 288.399 47.1895  12
  -1   7   6 322.796 44.3512   3
  -1  -7   6 367.803 44.6741   3
  -1  -7   6 402.528 52.2185   1
   1   7  -6 478.530 51.8283  15
   1   7  -5 2499.02 229.893  15
  -1   7   5 2296.48 224.620   3
  -1  -7   5 2187.09 223.895   3
  -1   7   5 2770.96 228.996  14
   1  -7  -5 1816.63 228.091  12
  -1   7   5 2524.23 225.858  11
  -1  -7   5 2501.84 243.099   4
  -1   7   5 1982.54 224.251   6
  -1  -7   5 2753.11 235.573   1
  -1   7   4 219.606 29.9967   6
   1  -7  -4 255.196 37.0335  12
  -1   7   4 323.339 34.7796  11
  -1   7   4 303.965 30.7220  10
  -1  -7   4 317.413 30.2351  10
  -1  -7   4 265.800 37.1591   9
  -1   7   4 262.304 31.3932   3
  -1  -7   4 238.455 30.4213   3
  -1   7   4 309.745 47.3755   8
   1   7  -4 325.946 37.8215  15
  -1  -7   4 419.884 54.6164   4
  -1  -7   3 2894.47 272.659   4
  -1  -7   3 2490.28 250.322  10
  -1   7   3 3062.72 251.424  10
  -1  -7   3 3327.35 262.640   9
  -1   7   3 2508.35 250.971   3
  -1  -7   3 2409.60 250.604   3
  -1   7   3 2500.53 267.163   8
   1  -7  -3 2273.55 257.901  12
   1   7  -3 2907.26 257.418  15
   1  -7  -2 223.729 31.4017  11
   1   7  -2 203.434 27.8608  15
  -1  -7   2 270.247 35.4384   9
  -1  -7   2 211.563 27.5996   6
   1  -7  -2 219.237 30.5250  12
  -1   7   2 167.070 33.7753   8
  -1  -7   2 235.769 41.7998   4
   1  -7  -1 334.410 36.8572  11
  -1   7   1 298.424 40.6851   8
  -1   7   1 263.594 48.5099   7
  -1  -7   1 282.570 34.5201   6
  -1   7   1 309.265 36.0716  14
  -1  -7   1 230.128 32.3693  14
   1   7   0 7.64330 8.18692  15
   1   7   0 12.0103 17.8990   8
  -1  -7   0 12.9515 6.29754   2
  -1  -7   0 25.9691 19.3456   4
  -1   7   0 18.9893 16.9352   7
   1  -7   0 9.26926 5.88891   6
   1  -7   0 16.8329 10.8790  11
  -1  -7   0 10.3607 7.78994  12
   1   7   1 227.335 52.3828   7
   1  -7   1 340.163 37.5930   6
  -1  -7  -1 312.964 40.7556  12
   1   7   1 336.732 45.1313  11
  -1  -7  -1 442.842 55.5080   4
   1  -7   1 365.164 46.3227   1
   1   7   1 432.066 56.8765   8
  -1   7  -1 276.854 48.8855   7
  -1  -7  -1 350.651 36.8342   2
  -1   7  -1 465.212 46.4408  15
   1   7   1 411.469 38.9628  15
   1   7   2 31.5263 14.5996  11
  -1  -7  -2 31.4885 10.8937  12
   1   7   2 53.3151 6.75381  10
   1  -7   2 29.4635 6.13317  10
  -1  -7  -2 47.8353 20.4678   4
   1  -7   2 72.8004 17.3609   1
   1   7   2 39.7824 21.5375   8
  -1   7  -2 61.9641 17.3588  15
   1   7   2 39.0392 8.87489  15
  -1   7  -2 51.5014 7.42282  13
  -1  -7  -2 44.0733 6.74340  13
  -1   7  -3 1733.63 145.026  15
   1   7   3 1466.81 156.604   8
   1  -7   3 1584.91 144.774   1
  -1   7  -3 1339.18 134.655  13
  -1  -7  -3 1459.84 134.342  13
  -1  -7  -3 1147.45 138.893  12
   1   7   3 1486.23 142.729  11
   1   7   3 1341.60 138.672   5
  -1  -7  -3 1565.14 151.500   4
  -1   7  -3 1270.75 134.583   3
  -1  -7  -3 1533.86 134.944   3
   1  -7   3 1158.93 135.587   5
   1   7   3 1387.39 138.713   6
   1   7   4 399.329 34.4743  14
  -1  -7  -4 339.271 36.0799  13
  -1  -7  -4 298.407 40.6422  12
   1   7   4 347.171 41.8484  11
  -1  -7  -4 399.341 49.8911   4
   1   7   4 299.092 40.3004   5
   1  -7   4 279.847 37.6087   5
   1   7   4 306.060 39.5766   3
  -1  -7  -4 358.148 37.0074   3
   1  -7   4 292.923 37.6945   3
   1  -7   4 361.925 43.8755   1
   1   7   4 246.365 51.0415   8
   1   7   4 288.773 32.9716  15
  -1   7  -4 401.210 45.5167  15
   1   7   4 254.137 39.9335   6
   1   7   5 1764.42 215.261  15
  -1   7  -5 2844.12 230.538  15
   1   7   5 2669.22 226.096   3
   1  -7   5 2316.08 222.901   3
   1   7   5 2383.28 224.912  11
  -1  -7  -5 2208.33 225.713  12
   1   7   5 2613.80 217.283  14
  -1   7  -5 2719.76 222.825  13
  -1  -7  -5 2825.13 221.884  13
   1  -7   5 2369.76 227.616   1
  -1  -7  -6 148.611 31.5192  12
  -1   7  -6 232.796 32.1123  13
   1   7   6 232.973 25.1823  14
  -1  -7  -6 235.799 30.8265  13
   1   7   6 190.230 31.5803  11
   1   7   6 266.948 34.7721   3
   1  -7   6 234.581 32.6483   3
  -1  -7  -7 529.387 73.8132  12
   1   7   7 608.211 72.3875  11
  -1  -7  -7 770.007 72.5864  13
  -1   7  -7 705.965 74.0945  13
   1   7   7 652.552 74.9934   3
   1  -7   7 603.872 73.0886   3
  -1  -7  -8 61.3707 21.7204  12
   1   7   8 37.2274 20.1556   3
   1  -7   8 61.4389 21.5985   3
   1   7   8 63.7971 19.9983  11
  -1  -7  -8 90.5509 21.5055  13
  -1   7  -8 109.247 26.6237  13
  -1   7  -9 3.91600 26.6078  15
  -1   7  -9 6.28881 21.5738  13
  -1  -7  -9-2.59388 17.9672  13
  -1  -7  -9-3.88512 18.4827  12
   1   7   9-6.85160 21.1239   3
   1  -7   9-3.31246 19.4282   3
  -1  -7 -10-16.9449 22.8078  12
  -1   7 -10-14.3344 25.9733  13
  -1  -7 -10-5.81865 21.9789  13
   1  -7  10 14.8946 21.5585   3
   1   7  10-3.77203 21.5415   3
   1   7  11 402.380 59.7371   3
   1  -8 -10 367.379 57.1498  12
  -1   8  10 337.520 52.6729   3
  -1   8   9 15.4704 15.3250   3
  -1  -8   9-14.6485 21.1974   1
   1  -8  -9 3.80330 20.4733  12
   1   8  -9 3.94280 27.8229  15
  -1  -8   8 1973.74 181.247   1
   1  -8  -8 1396.34 175.851  12
  -1   8   8 1606.40 171.349   3
  -1  -8   8 1633.27 171.306   3
   1   8  -8 2192.34 182.683  15
   1  -8  -7 13.1426 15.7410  12
  -1   8   7 16.6002 12.8971  11
   1   8  -7 34.8397 22.0168  15
  -1  -8   7 20.8084 20.4253   1
  -1  -8   7 43.3673 25.8551   4
  -1   8   7 18.9075 13.9054  14
  -1  -8   7 5.56340 12.8590   3
  -1   8   7 34.8318 13.9031   3
   1  -8  -6 313.112 50.8121  12
  -1   8   6 420.986 47.0981  11
  -1  -8   6 466.089 65.6424   4
  -1   8   6 370.974 46.3207   3
  -1  -8   6 350.323 45.5735   3
  -1  -8   6 492.334 58.0784   1
  -1   8   6 403.031 63.9307   8
  -1   8   6 444.665 47.4623  14
  -1  -8   5 68.6891 13.7519   3
  -1   8   5 71.2825 15.2244   3
  -1  -8   5 140.900 35.0133   4
  -1   8   5 68.6367 16.6628  11
   1  -8  -5 97.4820 22.3299  12
  -1   8   5 59.8330 27.8635   8
  -1   8   5 100.907 17.5869  14
   1   8  -5 89.0658 22.2251  15
   1   8  -4 33.3426 16.5617  15
  -1   8   4 32.7514 19.9443   8
   1  -8  -4 10.5872 13.8457  12
  -1   8   4 15.6824 7.08649  10
  -1  -8   4 21.3718 20.9942   4
  -1   8   4 16.2795 8.03702   3
  -1  -8   4 6.92807 6.70150   3
  -1   8   4 1.64431 11.0176  14
   1  -8  -3 74.4623 18.9725  12
   1   8  -3 71.4889 17.9883  15
  -1   8   3 43.5759 22.7449   8
  -1  -8   3 59.6143 23.5404   1
  -1   8   3 129.747 19.0932  14
  -1  -8   3 88.5309 30.2070   4
  -1  -8   3 68.5484 15.6698   6
   1  -8  -2 1787.42 159.775  11
  -1  -8   2 1712.18 172.853   4
  -1   8   2 1709.00 156.166  14
   1  -8  -2 1301.01 156.460  12
  -1   8   2 1480.23 164.467   8
   1   8  -2 1629.57 155.398  15
  -1  -8   2 1394.73 153.926   6
  -1   8   1 10.3201 16.0359   8
  -1  -8   1-1.60896 8.79728  12
  -1   8   1-6.09257 24.5941   7
  -1  -8   1-3.76227 9.30314   6
   1   8  -1-4.34708 10.2272  15
  -1  -8   0 3434.67 314.396   2
  -1  -8   0 3847.71 337.173   4
   1   8   0 3541.76 332.576   8
  -1   8   0 2781.25 332.471   7
  -1  -8   0 2939.10 317.232  12
  -1   8  -1 108.058 20.7825  15
   1   8   1 100.968 28.2222   8
   1  -8   1 102.459 23.0946   1
  -1  -8  -1 96.0503 12.1159   2
  -1  -8  -1 83.9960 29.1985   4
  -1  -8  -1 69.0477 16.0323  12
  -1   8  -1 42.5176 22.0984   7
   1   8   1 46.8880 27.4687   7
   1  -8   1 81.9592 13.0649   6
   1   8   2 2078.75 207.527  11
  -1  -8  -2 2119.36 217.126   4
   1  -8   2 2295.01 210.045   1
   1   8   2 1899.85 218.049   8
   1   8   2 2149.33 199.018  15
  -1   8  -2 2493.86 208.922  15
  -1  -8  -2 1575.24 202.306  12
  -1   8  -3 230.099 23.7959  13
  -1  -8  -3 189.176 30.1544  12
   1   8   3 202.494 32.8226  11
   1   8   3 212.187 22.7161  10
  -1  -8  -3 233.032 40.2489   4
   1   8   3 210.657 23.8142  15
  -1   8  -3 268.066 35.6478  15
   1   8   3 128.977 38.9408   8
   1   8   3 217.394 27.6365   6
   1  -8   3 190.154 33.1290   1
  -1  -8  -4-9.52815 13.9925  12
  -1  -8  -4 9.62535 8.80613  13
   1   8   4 14.7965 13.9029  11
   1   8   4 72.1456 14.8063   5
  -1  -8  -4 4.06105 19.3347   4
   1   8   4 23.4731 24.3492   8
   1   8   4 5.13227 10.1948   6
   1  -8   4 11.8161 15.4138   1
   1   8   4 10.1574 5.87351  15
  -1   8  -4-2.78816 18.0086  15
   1   8   5 38.6499 14.8652  11
   1  -8   5 13.7079 11.4882   3
   1   8   5 14.2602 12.7353   3
  -1   8  -5 21.1385 19.3873  15
   1   8   5 12.3357 24.2862   8
  -1  -8  -5 23.7452 10.1948  13
  -1  -8  -5 15.9081 16.2881  12
  -1   8  -5 35.1339 12.6405  13
   1  -8   5 18.1276 17.3743   1
  -1   8  -6 588.138 65.1118  13
  -1  -8  -6 606.288 63.9604  13
   1   8   6 520.490 67.0013   3
   1  -8   6 542.108 65.8730   3
  -1   8  -6 722.617 75.3716  15
   1   8   6 572.254 67.3336  11
  -1  -8  -6 587.756 70.0741  12
   1  -8   6 693.535 73.9384   1
   1   8   7 27.9579 15.9660  11
  -1   8  -7 60.2205 25.9121  15
  -1   8  -7 75.7068 20.9837  13
  -1  -8  -7 54.6113 19.9408  12
   1   8   7 57.2510 19.8496   3
   1  -8   7 55.5027 19.4205   3
  -1   8  -8 946.705 92.4638  13
   1   8   8 740.929 91.6260   3
  -1  -8  -8 770.120 93.6510  12
  -1  -8  -9 7.88415 23.7368  12
  -1   8  -9 5.79270 21.0045  13
   1   8   9 13.3250 20.0641   3
   1   9  -9 37.4941 29.3059  15
  -1  -9   9 47.8689 27.0312   1
   1  -9  -9 23.4853 21.9547  12
   1   9  -8 30.0756 25.8116  15
  -1   9   8 35.8739 29.0227   8
  -1  -9   8-11.6288 23.6351   1
   1  -9  -8 7.38803 20.2137  12
  -1   9   7 281.335 57.3584   8
  -1  -9   7 419.167 56.6767   1
   1  -9  -7 289.192 49.4545  12
  -1  -9   6 89.1341 36.8997   4
  -1   9   6 54.2757 30.9474   8
  -1   9   6 92.8798 17.1793  14
   1  -9  -6 41.2711 19.9446  12
   1   9  -6 103.149 26.7884  15
  -1  -9   5 587.695 88.2959   4
   1   9  -5 699.280 75.8460  15
  -1   9   5 529.580 82.0557   8
   1  -9  -5 590.607 74.9354  12
  -1   9   5 710.012 69.7642  14
  -1   9   4 282.219 37.1813  14
  -1  -9   4 325.549 57.9401   4
  -1   9   4 280.900 51.2760   8
  -1  -9   4 357.648 51.0125   1
   1   9  -4 353.300 42.8829  15
   1  -9  -4 291.835 42.4696  12
   1  -9  -3 1016.79 136.632  12
  -1  -9   3 1431.78 146.730   1
  -1  -9   3 1461.15 156.580   4
   1   9  -3 1431.77 137.628  15
  -1   9   3 1360.49 148.865   8
  -1  -9   3 1262.72 134.787   6
  -1   9   3 1556.73 136.181  14
  -1  -9   2 61.4232 28.3872   4
   1   9  -2 138.803 23.0223  15
  -1   9   2 131.126 30.8093   8
  -1   9   2 100.748 36.7050   7
  -1  -9   2 118.622 20.6617   6
   1  -9  -2 141.993 24.8457  12
   1   9  -1 239.000 27.6311  15
   1  -9  -1 168.945 29.7060  12
  -1  -9   1 148.683 25.3463  12
  -1  -9   1 202.834 29.6774   6
  -1   9   1 169.004 42.8579   7
   1  -9   0 114.110 25.8032   1
  -1  -9   0 88.6287 14.2303   2
  -1  -9   0 110.952 33.0314   4
   1   9   0 89.8151 17.2246  15
  -1   9   0 137.894 23.7725  15
   1   9   0 117.316 31.5797   8
  -1  -9   0 74.0237 17.6208  12
  -1   9   0 96.4144 32.6560   7
   1  -9   1 85.6811 23.0113   1
  -1  -9  -1 56.1223 27.1815   4
  -1   9  -1 100.383 22.9491  15
   1   9   1 75.8483 27.8028   8
  -1  -9  -1 85.4888 17.8500  12
  -1   9  -1 52.9513 24.2589   7
   1  -9   2 154.741 29.8937   1
  -1  -9  -2 153.303 36.8487   4
   1   9   2 175.973 40.1650   8
   1   9   2 69.2867 35.9032   7
   1  -9   2 126.171 18.4441   6
  -1  -9  -2 128.632 22.8228  12
   1   9   2 144.061 18.6922  15
  -1   9  -2 136.674 27.7719  15
  -1  -9  -3 849.031 90.4055   4
  -1   9  -3 798.815 79.7302  15
   1   9   3 651.995 67.0076  15
   1   9   3 588.399 87.9921   8
   1  -9   3 787.328 81.5068   1
  -1  -9  -3 544.840 72.9988  12
   1   9   3 728.573 78.0182  11
  -1   9  -4 597.500 64.6797  15
   1   9   4 385.603 71.7080   8
   1  -9   4 494.331 62.9076   1
  -1  -9  -4 435.270 58.0391  12
   1   9   4 554.654 61.6064  11
   1   9   5 1507.73 143.430  11
  -1   9  -5 1645.28 148.510  15
   1   9   5 1259.67 158.070   8
   1  -9   5 1578.29 148.198   1
  -1  -9  -5 1184.68 141.786  12
  -1   9  -5 1287.01 134.924  13
  -1   9  -6 241.136 40.3346  15
   1   9   6 171.227 44.4186   8
   1  -9   6 231.868 39.3074   1
   1   9   6 215.942 33.4103  11
  -1  -9  -6 161.090 32.7747  12
   1   9   7 217.761 50.8402   8
  -1  -9  -7 169.594 37.1440  12
  -1   9  -8 24.7821 30.4509  15
  -1  -9  -8 3.61222 18.2049  12
  -1  10   9 228.259 50.6679   8
  -1  10   8 179.056 48.1955   8
  -1 -10   8 225.605 47.1462   1
   1 -10  -8 192.830 40.1323  12
  -1  10   7 287.078 54.7477   8
   1 -10  -7 266.238 45.9122  12
   1  10  -7 372.717 52.8717  15
  -1 -10   6 154.381 37.7728   1
  -1  10   6 72.5319 30.0738   8
   1 -10  -6 82.5552 24.9056  12
   1  10  -6 116.146 30.1163  15
  -1 -10   5 464.310 70.5519   4
  -1 -10   5 412.840 58.4117   1
  -1  10   5 363.070 59.8315   8
   1 -10  -5 318.395 49.0967  12
   1  10  -5 361.834 50.4917  15
   1  10  -4 73.0531 23.3449  15
  -1  10   4 30.0155 26.8161   8
  -1 -10   4 87.3103 33.1011   4
   1 -10  -4 70.0565 21.7122  12
  -1 -10   4 74.9940 26.7422   1
   1  10  -3 298.766 37.7924  15
  -1  10   3 253.075 46.0741   8
  -1 -10   3 264.791 53.0729   4
   1 -10  -3 199.629 35.3147  12
  -1 -10   3 257.533 45.6511   1
  -1  10   3 239.087 54.4606   7
  -1  10   2 287.400 48.1302   8
   1 -10  -2 264.228 41.0393  12
  -1 -10   2 270.391 38.0878  12
   1  10  -2 362.466 40.3896  15
  -1  10   2 351.239 63.5317   7
  -1  10   1 540.912 85.9215   7
  -1 -10   1 630.246 85.6394   4
   1  10  -1 567.516 84.4527   7
  -1  10   1 755.213 69.0318  15
   1  10  -1 634.740 65.8468  15
   1 -10  -1 503.816 68.1484  12
  -1 -10   1 543.308 65.2814  12
  -1 -10   0 466.582 72.1021   4
  -1  10   0 477.710 73.9075   7
   1 -10   0 513.064 62.2138   1
  -1  10   0 537.179 56.8394  15
   1  10   0 477.182 51.7550  15
  -1 -10   0 378.732 52.0824  12
  -1 -10  -1 1036.38 123.589   4
  -1 -10  -1 890.907 104.807  12
  -1  10  -1 882.394 120.607   7
   1  10   1 1072.17 121.752   8
   1  10   1 949.768 101.385  15
  -1  10  -1 1207.43 110.287  15
   1 -10   1 1323.65 117.055   1
   1 -10   2 172.438 35.3440   1
  -1 -10  -2 160.330 41.6992   4
  -1  10  -2 224.005 34.2477  15
   1  10   2 212.150 45.1692   8
  -1 -10  -2 166.977 28.2463  12
   1  10   2 143.582 47.4268   7
   1 -10   3 10.4999 19.7880   1
  -1 -10  -3 20.6136 26.9196   4
   1  10   3 53.9992 29.7203   8
   1  10   3 42.0361 34.9156   7
  -1 -10  -3 12.0556 14.6275  12
  -1  10  -3 20.2288 20.1026  15
   1 -10   4 64.3868 25.5564   1
   1  10   4 25.2579 30.3055   8
  -1 -10  -4 21.2645 16.8735  12
   1  10   4 52.5087 20.7586  11
  -1  10  -4 65.7751 24.7202  15
   1 -10   5 3.61295 22.0221   1
   1  10   5 6.50389 25.5237   8
  -1 -10  -5 5.80482 15.8794  12
   1  10   5 2.63492 15.6723  11
  -1  10  -5 30.8820 23.5527  15
   1  10   6 79.5949 36.5828   8
  -1 -10  -6 62.6617 22.1454  12
  -1  10  -6 129.608 34.5467  15
   1 -10   6 97.1674 29.7604   1
   1  10   7 244.801 59.4424   8
  -1 -10  -7 289.123 47.6265  12
   1  11  -7 122.732 33.8526  15
  -1  11   7 92.6514 35.5741   8
   1 -11  -7 79.3755 28.0845  12
  -1  11   6 224.327 51.2799   8
   1 -11  -6 229.960 40.9525  12
  -1 -11   6 325.271 52.8233   1
   1  11  -6 261.791 43.5335  15
   1  11  -5 14.9451 21.8646  15
  -1  11   5-5.32316 24.8296   8
  -1 -11   5-4.40580 25.5155   1
   1 -11  -5 25.2501 20.1670  12
  -1 -11   4 645.115 72.1235   1
  -1 -11   4 467.734 76.9956   4
   1 -11  -4 364.490 56.9997  12
  -1  11   4 427.002 69.4551   8
   1  11  -4 536.089 60.6321  15
  -1  11   4 485.622 83.8261   7
  -1 -11   3 62.4759 30.1106   1
  -1 -11   3 124.600 46.2985   4
  -1  11   3 98.9492 31.0779   8
   1 -11  -3 37.6543 19.9576  12
  -1  11   3 57.1187 35.3099   7
  -1  11   3 83.3202 19.1082  15
   1  11  -3 64.9697 21.7973  15
  -1 -11   2 195.677 38.3603   1
  -1  11   2 147.116 24.9409  15
   1  11  -2 122.407 25.0602  15
   1 -11  -2 118.019 26.9026  12
  -1  11   2 115.374 45.7437   7
   1 -11  -1-3.53496 22.3126   1
  -1  11   1 2.01039 15.4257  15
   1  11  -1 10.5572 14.9782  15
  -1 -11   1 6.23816 29.6781   4
   1 -11  -1 5.34528 15.0484  12
   1  11  -1 7.01765 26.7098   7
  -1  11   1-7.40986 31.5305   7
   1 -11   0 97.8246 27.9979   1
   1  11   0 41.1573 15.5752  15
  -1  11   0 72.2884 21.4536  15
  -1 -11   0 66.9168 34.7525   4
  -1 -11   0 76.9854 19.6090  12
   1 -11   0 42.0440 20.5622  12
  -1  11   0 81.3611 36.9709   7
   1  11   0 120.288 43.3258   7
   1 -11   1 3.64203 22.4634   1
  -1 -11  -1 17.7119 28.0914   4
  -1  11  -1 10.0138 18.6112  15
  -1 -11  -1 2.14337 13.3840  12
   1  11   2 418.337 63.7078   8
  -1  11  -2 369.954 50.8979  15
  -1 -11  -2 340.225 46.7204  12
   1 -11   2 429.875 56.0906   1
  -1 -11  -3 45.1543 19.0260  12
   1  11   3 53.5439 33.4803   8
   1  11   3 68.8025 42.8876   7
  -1  11  -3 77.1898 27.6698  15
   1 -11   3 75.0400 28.8861   1
  -1 -11  -4 260.338 42.7801  12
   1  11   4 290.855 56.5999   8
   1  11   4 240.045 62.6725   7
   1 -11   4 350.472 51.7416   1
  -1  11  -4 410.708 51.6611  15
   1  11   5 65.5599 35.1258   8
  -1  11  -5 42.8514 28.5068  15
   1 -11   5 65.8182 28.3044   1
  -1 -11  -5 53.4158 22.1375  12
   1  11   6 295.310 62.1741   8
  -1  11  -6 418.162 58.5317  15
   1 -11   6 469.658 61.3818   1
  -1 -11  -6 320.901 51.1207  12
  -1 -11  -7 6.83468 21.5766  12
  -1  12   6 21.7612 30.1972   8
   1 -12  -6 6.86164 22.3995  12
   1  12  -6 6.88390 25.5955  15
  -1  12   5 15.4920 26.5486   8
   1 -12  -5 57.9597 24.1387  12
   1  12  -4-22.0176 23.2973  15
  -1  12   4-9.96342 26.4103   8
  -1 -12   4 4.59498 29.3453   1
  -1  12   4 34.2660 40.7652   7
   1 -12  -4-15.1970 19.8524  12
   1  12  -3 206.386 32.8529  15
  -1 -12   3 254.912 46.4325   1
  -1  12   3 81.8981 46.8324   7
   1 -12  -3 132.140 31.1206  12
   1  12  -2-2.06653 19.0651  15
   1 -12  -2-10.7638 24.8538   1
  -1 -12   2 9.31180 30.0456   1
  -1  12   2-7.98030 33.0971   7
   1 -12  -2-2.80377 16.4471  12
  -1  12   1 416.077 45.4956  15
   1 -12  -1 315.472 51.7660   1
  -1  12   1 311.888 66.0589   7
   1 -12  -1 262.783 43.6923  12
  -1  12   0 4.49804 18.2889  15
   1 -12   0 26.4401 26.4126   1
  -1  12   0 14.1466 32.2781   7
   1  12   0 7.72459 32.0388   7
   1 -12   0-2.63696 18.0984  12
  -1  12  -1 547.385 65.5791  15
   1 -12   1 529.805 71.5866   1
   1  12   2 11.5592 31.1132   8
  -1  12  -2-2.74188 20.7165  15
   1 -12   2 19.2434 25.9007   1
   1  12   3 95.6641 37.5765   8
  -1  12  -3 54.2054 26.0239  15
   1 -12   3 19.6647 25.7800   1
   1  12   4-6.14196 27.4250   8
  -1  12  -4 23.3388 26.9330  15
   1 -12   4 11.9417 25.9807   1
   1 -13  -2 44.1459 29.7864   1
   1 -13  -1-3.75385 27.9328   1
  -1 -13   1-28.3045 33.9172   1
   1 -13   0 45.5849 29.0088   1
   1 -13   1-3.88860 26.4237   1
  -1  13  -2 147.200 32.3016  15
   1 -13   2 118.675 35.9927   1
  -1  13  -3 54.4847 26.1102  15
   2   0 -14 167.504 37.6785   9
   2   0 -13-5.08189 33.8452  13
   2   0 -13 3.87462 20.8536   9
  -2   0  13-4.80185 22.3815   3
   2   0 -12 128.582 36.8911  13
   2   0 -12 108.663 27.4308   9
  -2   0  12 44.1334 25.0415   3
   2   0 -11-4.08419 22.6604  13
  -2   0  11-3.91093 17.8483   3
   2   0 -11-3.09890 16.1524   9
   2   0 -10 2394.54 223.985   9
   2   0 -10 2108.79 221.887  12
  -2   0  10 1722.37 222.841   3
   2   0  -9 6.83209 10.8338  12
   2   0  -9-3.10818 15.6480  13
  -2   0   9-5.77060 13.1653   3
   2   0  -9 4.63689 10.8064   9
  -2   0   8 6182.26 613.241   4
   2   0  -8 6798.84 621.629   9
   2   0  -8 6708.73 621.289  12
  -2   0   8 5850.76 622.774   3
   2   0  -7 8.38524 8.10303   1
  -2   0   7 2.83264 5.84290   4
  -2   0   7 2.23851 9.29660   3
   2   0  -7 6.32809 7.23546  12
   2   0  -7 17.8791 11.8491  13
   2   0  -7 1.69076 8.37327   9
  -2   0   6 2754.88 307.185   3
   2   0  -6 3079.10 305.419  12
  -2   0   6 3847.97 306.801  12
   2   0  -6 3311.50 305.028   1
  -2   0   6 2912.08 304.170  15
   2   0  -5 4.23481 4.15326  12
  -2   0   5 1.04106 5.85993  12
   2   0  -5-1.83646 5.16858   1
  -2   0   5-3.10205 6.08451   3
  -2   0   4 128.739 15.3688  12
   2   0  -4 118.238 14.7455  12
  -2   0   4 99.7901 12.9767   1
   2   0  -4 116.956 14.2934   1
  -2   0   4 107.907 16.4678   3
  -2   0   4 125.087 16.0595  13
  -2   0   3 0.40115 2.19435   1
  -2   0   3 0.82799 4.16947  13
  -2   0   3 0.73590 3.70594  11
   2   0  -3 0.66564 3.03857  12
  -2   0   3 2.84190 4.00007  12
   2   0  -3 1.57212 3.26117  10
   2   0  -2 11759.6 992.967   2
   2   0  -2 10408.8 992.517  10
  -2   0   2 10157.5 992.276  11
   2   0  -2 9754.05 992.324  11
   2   0  -1 0.79370 3.22600   6
   2   0  -1 3.76700 2.48272   8
   2   0  -1 0.46414 2.40788   9
  -2   0   1 6.63264 3.04443   9
   2   0  -1 0.83540 3.20166  10
   2   0  -1 2.98408 3.42490   2
   2   0   0 9666.95 911.245   6
  -2   0   0 8466.24 907.316  14
  -2   0   0 10364.2 906.443   9
   2   0   1-1.59467 6.95603   5
   2   0   1 2.85534 4.71029   3
  -2   0  -1-1.27352 2.78464  14
   2   0   1 0.74594 3.62522  14
  -2   0  -2 11864.9 1286.77   9
  -2   0  -2 14377.3 1285.56  15
   2   0   2 13736.9 1286.06  14
   2   0   2 14238.9 1290.35   3
  -2   0  -3-1.51663 4.44856  15
  -2   0  -3 10.9538 5.97057   9
   2   0   3 2.57146 4.39277  14
   2   0   3-3.72201 5.31271   3
   2   0   4 59.0556 13.9776   3
  -2   0  -4 46.3398 9.29635  15
   2   0   5 2.54638 10.5608   3
  -2   0  -5-1.20911 6.70865   4
  -2   0  -5 2.17040 6.28129  15
   2   0   6 565.454 73.7600   3
  -2   0  -6 726.071 68.7952  15
  -2   0  -6 634.419 66.4652   4
  -2   0  -7-2.79936 13.3226   9
   2   0   7 23.4965 14.6400   3
  -2   0  -7 3.06886 8.64568  15
   2   0   8 4759.44 541.876   3
  -2   0  -8 5701.10 541.842   9
  -2   0  -8 5947.07 535.270  15
  -2   0  -9-3.69753 17.2342   9
   2   0   9 17.1349 16.3025   3
  -2   0  -9-8.43400 14.6044  15
   2   0  10 1211.98 164.756   3
  -2   0 -10 1723.13 168.001   9
  -2   0 -10 1649.28 158.028  15
  -2   0 -11 18.6609 23.9568   9
   2   0  11 15.6525 22.2583   3
   2   1 -14 160.629 36.7641   9
   2   1 -13 1690.68 172.796   9
   2  -1 -13 1813.97 176.151   9
  -2  -1  13 1417.09 174.542   3
  -2   1  13 1163.80 172.091   3
  -2  -1  12 155.577 39.1444   3
   2   1 -12 260.932 40.3573   9
   2  -1 -12 237.001 41.5909   9
   2  -1 -11 1194.12 129.532   9
   2   1 -11 1320.42 128.348   9
   2  -1 -11 1126.53 127.754  12
  -2  -1  11 917.364 127.773   3
   2  -1 -10 136.013 27.8348  12
   2  -1 -10 133.507 32.5205  13
  -2  -1  10 103.111 26.8463   3
   2  -1 -10 177.474 28.9046   9
   2   1 -10 173.533 27.3340   9
   2   1  -9 356.796 40.1260   9
   2  -1  -9 286.178 40.5067   9
   2  -1  -9 271.677 39.3385  12
  -2  -1   9 246.722 40.3646   3
   2  -1  -9 387.859 46.0552  13
   2  -1  -8-4.11390 9.59115  12
   2   1  -8 10.6228 10.1102  12
   2  -1  -8 13.1052 14.5431  13
  -2  -1   8-4.00828 7.84067   4
  -2  -1   8 15.7170 13.1904   3
   2   1  -8 8.95210 8.85539   9
  -2   1   7 1906.92 203.294   4
  -2  -1   7 2286.54 209.438   4
   2  -1  -7 2232.42 207.664   1
   2   1  -7 2166.13 209.853   1
   2   1  -7 2345.51 209.363   9
  -2  -1   7 1880.79 211.457   3
   2  -1  -7 2757.22 215.611  13
   2  -1  -7 2164.50 210.457  12
   2   1  -7 2379.33 209.480  12
  -2  -1   6 502.474 48.1828   4
   2   1  -6 458.716 46.4395  12
  -2   1   6 459.026 47.6315  12
  -2  -1   6 474.000 46.5341  12
   2  -1  -6 429.626 47.6182  12
   2   1  -6 427.912 45.8131   9
   2  -1  -6 452.541 49.5484  13
  -2  -1   6 378.902 48.3114   3
  -2   1   6 343.358 44.9926  15
   2   1  -6 456.207 48.1617  15
   2   1  -6 362.688 46.8217   1
   2  -1  -6 421.740 44.9074   1
   2   1  -5 4553.27 429.194   9
  -2  -1   5 4065.78 428.894   1
   2  -1  -5 4748.64 428.610   1
  -2  -1   5 4315.57 432.204   3
  -2  -1   5 5126.26 430.048  12
  -2   1   5 5126.53 431.880  12
   2   1  -5 4494.13 429.359  12
   2  -1  -5 4353.15 431.014  12
  -2   1   5 3790.22 429.882  15
  -2  -1   4 2364.38 229.898  15
  -2  -1   4 2215.82 231.932   3
  -2  -1   4 2154.47 231.050  10
   2   1  -4 2572.94 229.145   9
   2   1  -4 2451.04 229.302  12
  -2   1   4 2633.38 231.964  12
  -2  -1   4 2351.24 229.458  12
   2  -1  -4 2447.99 228.483   1
  -2  -1   4 2333.60 229.944   1
  -2  -1   4 2165.54 230.766  13
   2  -1  -4 2491.82 232.111  13
  -2  -1   3 13619.4 1370.52  13
  -2  -1   3 14254.6 1368.89  12
   2   1  -3 14564.2 1368.61  12
  -2  -1   3 15752.9 1372.73  11
  -2   1   3 14947.5 1368.61  11
   2  -1  -3 14415.7 1367.79   1
  -2   1   3 12473.9 1369.83   2
  -2  -1   3 14694.6 1369.85  15
   2  -1  -3 14896.9 1370.57  10
  -2  -1   3 15333.5 1370.22  10
   2   1  -2 128.657 12.0085  12
   2  -1  -2 98.4855 11.8935  11
   2   1  -2 95.1044 14.6153  11
  -2  -1   2 133.770 14.3477  10
   2  -1  -2 116.194 13.6071  10
   2  -1  -2 138.467 14.1412   2
  -2   1   2 100.551 13.7257   2
  -2  -1   2 92.8454 12.9803  15
   2   1  -1 2499.88 215.177  11
  -2  -1   1 2336.37 212.838   2
  -2  -1   1 2222.78 210.329   9
  -2   1   1 2553.23 213.671   6
   2  -1  -1 2021.62 211.916   6
   2   1  -1 2006.61 213.257   6
  -2  -1   1 2400.60 212.540   7
   2   1  -1 2093.54 214.033   8
   2  -1  -1 1874.72 213.258   2
   2  -1  -1 2208.98 212.914  10
  -2   1   0 1455.86 134.735   9
  -2  -1   0 1428.01 132.487   9
  -2  -1   0 1233.23 135.825   5
   2   1   0 1447.63 131.643  12
   2   1   0 1125.00 134.272   7
   2   1   0 1158.90 136.251   6
  -2   1   0 1565.15 135.586  14
   2   1   1 102.420 12.1449  12
  -2  -1  -1 113.021 15.3178   3
  -2   1  -1 104.951 14.3897   9
  -2  -1  -1 86.4019 12.5620   9
   2  -1   1 86.9326 15.9437   5
   2  -1   1 94.9571 15.2695   3
  -2   1  -1 94.3797 13.5667  14
   2   1   1 109.372 12.2960  14
   2  -1   2 161.437 23.0139   5
  -2   1  -2 162.762 20.7575   9
  -2  -1  -2 200.921 21.3188   9
  -2  -1  -2 158.537 17.1666  15
  -2   1  -2 157.783 19.8119  15
  -2  -1  -2 183.042 22.2616   3
   2  -1   2 175.729 22.3293   3
   2   1   2 160.735 18.6907  12
   2  -1   2 149.152 19.4844  14
   2   1   2 138.992 17.7037  14
   2  -1   3 8893.42 931.073   3
  -2  -1  -3 9661.83 929.811   9
   2  -1   3 9471.88 927.961  14
  -2  -1  -3 9544.92 925.570  15
  -2   1  -3 11268.9 928.757  15
  -2   1  -4 2274.02 195.202  15
  -2  -1  -4 1870.57 192.163  15
  -2  -1  -4 2584.47 199.834   3
   2  -1   4 1975.73 199.282   3
   2  -1   4 2047.48 195.977   9
  -2  -1  -4 1894.52 197.123   9
  -2   1  -4 1957.02 196.563   4
   2  -1   4 1761.02 193.939  14
  -2   1  -5 4272.96 473.996   9
  -2  -1  -5 5132.35 469.842  15
  -2   1  -5 5431.78 472.301  15
   2  -1   5 5057.66 478.129   3
  -2   1  -5 4475.57 473.277   4
  -2   1  -6 1362.85 137.443   9
  -2  -1  -6 1375.81 131.633  15
  -2   1  -6 1513.54 134.166  15
   2  -1   6 1151.94 137.965   3
  -2   1  -6 1192.99 133.061   4
  -2   1  -7 2880.86 287.695   9
  -2   1  -7 3154.31 283.533  15
  -2  -1  -7 3036.39 281.523  15
  -2   1  -7 2794.74 279.399   4
   2  -1   7 2545.42 288.506   3
  -2   1  -8 57.3420 16.3732  15
  -2  -1  -8 43.4611 17.8974   9
  -2   1  -8 67.7310 19.8357   9
  -2  -1  -8 24.7318 13.2949  15
   2  -1   8 41.7058 20.1785   3
  -2   1  -9 25.6473 19.5298   9
  -2  -1  -9 26.5165 19.1941   9
  -2   1  -9 23.0110 16.6710  15
   2  -1   9 17.0743 18.7371   3
  -2  -1 -10 110.092 28.7474   9
  -2   1 -10 78.4259 25.7894   9
   2  -1  10 66.3610 26.7290   3
  -2   1 -10 86.5935 25.6074  15
  -2   1 -11 687.021 88.0965   9
  -2  -1 -11 708.597 88.7673   9
  -2   1 -11 669.530 80.7140  15
   2  -1  11 514.332 86.5355   3
   2  -2 -13 35.6362 25.5961   9
   2   2 -13 72.6457 26.1410   9
   2   2 -13 30.9950 33.0055  13
   2  -2 -13 95.8967 37.4169  13
  -2   2  13 50.7883 25.3771   3
   2   2 -12 227.142 33.9847   9
   2  -2 -12 144.672 32.2610   9
  -2   2  12 127.621 32.6286   3
  -2  -2  12 53.0898 27.9958   3
   2  -2 -12 101.529 29.4556  12
   2   2 -12 167.942 40.2670  13
   2  -2 -12 243.746 43.3424  13
   2   2 -11 546.887 60.1538   9
   2  -2 -11 484.255 62.6026   9
  -2  -2  11 430.100 62.7171   3
  -2   2  11 353.965 59.2665   3
   2   2 -11 661.497 71.7540  13
   2  -2 -11 546.345 67.1725  13
   2  -2 -11 427.227 61.3588  12
   2   2 -10 1141.99 111.094   9
   2  -2 -10 1056.13 114.689   9
   2  -2 -10 878.694 111.002  12
  -2   2  10 821.939 111.300   3
  -2  -2  10 908.229 113.286   3
   2  -2 -10 1312.73 118.963  13
   2   2 -10 1430.65 121.898  13
   2   2  -9 2548.93 212.579  13
   2  -2  -9 2427.81 211.034  13
   2   2  -9 2132.67 204.076   9
   2  -2  -9 2111.31 206.446  12
  -2   2   9 1548.00 204.057   3
  -2  -2   9 1614.74 204.974   3
   2   2  -9 2323.04 207.570  15
  -2  -2   9 2077.45 201.842   4
  -2  -2   8 3345.48 365.829   4
   2  -2  -8 3971.89 363.649   1
   2   2  -8 4014.92 365.536   9
   2  -2  -8 3427.99 366.955  12
  -2   2   8 3078.28 366.885   3
  -2  -2   8 3094.11 367.231   3
   2   2  -8 4308.02 369.289  15
   2   2  -8 4739.58 373.230  13
   2  -2  -8 4647.14 372.570  13
  -2  -2   7 3175.88 332.339   4
   2  -2  -7 3322.38 327.753   1
   2   2  -7 3458.33 329.132   9
   2  -2  -7 3188.12 331.612  12
  -2  -2   7 3722.18 329.378  12
  -2  -2   7 2963.88 332.163   3
  -2   2   7 2919.60 331.811   3
   2   2  -7 3729.96 332.791  15
   2  -2  -7 3860.06 334.658  13
   2   2  -7 3939.78 335.219  13
  -2  -2   6 1489.84 137.335   4
   2  -2  -6 1345.75 130.127   1
  -2  -2   6 1229.76 131.787   1
   2   2  -6 1396.43 131.389   9
  -2  -2   6 1452.36 131.750  12
  -2   2   6 1149.96 133.659   3
  -2  -2   6 1152.75 134.187   3
   2   2  -6 1480.85 135.036  15
  -2   2   6 1128.49 131.279  15
   2  -2  -6 1529.23 136.197  13
   2   2  -6 1488.85 136.024  13
   2  -2  -5 502.462 52.4771  13
  -2   2   5 570.816 53.4099  12
  -2  -2   5 531.136 49.5978  12
  -2  -2   5 547.235 54.2798   4
  -2  -2   5 490.359 51.0279  10
   2   2  -5 478.461 48.9750   9
  -2   2   5 426.821 51.5327   3
  -2  -2   5 426.705 51.7466   3
  -2  -2   5 414.614 49.1629  15
  -2  -2   5 439.048 50.5900   1
  -2   2   4 6.87474 5.30324  13
   2  -2  -4 2.36238 5.28867  13
   2   2  -4 7.09796 4.92489  13
  -2  -2   4 7.66900 3.61953  12
  -2  -2   4 1.50322 6.24893  11
  -2   2   4-0.90067 4.79046  10
  -2  -2   4-0.88303 4.69743  10
  -2   2   4 5.79279 4.09839   2
  -2  -2   4 2.43087 4.92499   1
   2   2  -4 11.6833 3.56292   9
  -2  -2   4 1.54082 4.71310  15
  -2   2   4 1.22303 5.34969   3
  -2  -2   4 8.92913 5.57815   3
  -2   2   3 399.787 33.5472  10
  -2  -2   3 352.475 32.8251  10
   2   2  -3 305.992 30.4504   9
  -2  -2   3 289.455 31.7499  15
  -2   2   3 272.990 33.0661   3
  -2  -2   3 261.747 33.4093   3
  -2   2   3 315.034 31.9971   2
  -2  -2   3 273.623 32.4878  13
  -2   2   3 278.717 32.5458  13
  -2  -2   3 309.140 30.5700  12
  -2   2   2 12714.9 1188.06  10
   2   2  -2 12458.7 1187.58  10
  -2  -2   2 12887.9 1187.81  10
   2  -2  -2 12892.5 1187.57  10
  -2  -2   2 12062.2 1186.68  15
   2   2  -2 13605.9 1187.87  15
   2  -2  -2 12149.3 1187.64   2
   2   2  -2 11034.0 1190.66  11
   2   2  -1 14353.8 1227.68  11
  -2  -2   1 13644.0 1224.48   2
   2   2  -1 12932.6 1224.75  10
   2  -2  -1 11769.5 1223.79  10
   2  -2  -1 11657.7 1222.47   6
  -2  -2   1 13842.4 1227.02   6
   2   2  -1 10850.1 1227.51   8
  -2   2   1 12496.6 1222.14   8
   2   2  -1 12937.5 1226.54   7
   2  -2  -1 14348.4 1222.33   1
  -2  -2   1 13223.0 1222.07  15
  -2  -2   0 1174.14 110.338  15
   2   2   0 1221.40 121.730   8
   2   2   0 1236.68 113.114   2
  -2  -2   0 1033.54 115.172   5
  -2   2   0 1164.51 116.805   5
   2  -2   0 1240.58 112.378   1
  -2  -2   0 1229.77 114.953   2
  -2   2   0 1176.28 112.215   1
   2   2   0 1298.91 111.549  12
  -2  -2   0 1183.80 111.670  12
  -2   2   0 968.480 113.657   7
  -2  -2   0 1352.71 120.797   6
   2   2   1 6468.05 603.742   2
  -2   2  -1 6364.08 602.250   1
   2   2   1 6087.02 607.229   5
   2  -2   1 5850.60 605.921   5
  -2   2  -1 6758.28 605.837   9
   2  -2   1 6657.54 602.977   7
  -2  -2  -1 6674.37 604.604   3
  -2   2  -1 8726.00 607.095   3
   2   2   1 6596.37 601.817  12
  -2  -2  -1 6187.87 602.175  12
  -2  -2  -2 6027.82 614.038  12
   2   2   2 6332.78 613.244  12
   2   2   2 6398.59 619.174   5
   2  -2   2 6434.63 618.098   5
  -2   2  -2 6180.94 613.524   1
   2   2   2 6964.20 618.613   3
  -2  -2  -2 7700.31 616.705   3
  -2   2  -2 8128.47 618.010   3
   2  -2   2 6643.46 617.448   3
   2   2   2 6297.64 611.321  14
  -2  -2  -2 6256.52 610.589  15
  -2  -2  -3 752.440 80.0854  12
  -2   2  -3 791.608 79.3673   1
  -2   2  -3 794.373 83.4207   4
   2  -2   3 836.394 80.8728   9
   2  -2   3 656.775 79.2627  14
  -2  -2  -3 746.246 76.1069  15
  -2   2  -3 871.762 80.9580  15
   2   2   3 748.354 83.1150   3
   2  -2   3 735.725 82.2446   3
  -2  -2  -4 40.3842 7.82845  15
  -2   2  -4 44.1406 10.6976  15
   2  -2   4 40.2988 10.7610   9
  -2  -2  -4 56.6344 13.0731   9
  -2   2  -4 52.8229 12.6790   9
   2  -2   4 46.2180 11.0275  14
  -2   2  -4 26.6704 11.4364   4
   2   2   4 49.0679 10.0168  12
  -2  -2  -4 51.2296 11.6029  12
   2   2   4 47.0281 13.6738   3
  -2  -2  -4 59.6165 13.1056   3
  -2   2  -4 67.8176 14.9568   3
   2  -2   4 44.8995 12.7998   3
  -2   2  -5 233.321 30.9037   9
  -2  -2  -5 206.680 30.7002   9
  -2   2  -5 217.936 28.5329  15
  -2  -2  -5 212.421 24.9901  15
   2   2   5 199.548 31.6934   3
   2  -2   5 192.362 31.1332   3
  -2  -2  -5 241.101 30.1258  12
  -2  -2  -5 231.014 24.3058   4
  -2   2  -5 210.298 31.6337   4
  -2   2  -6 210.109 31.8962   9
  -2  -2  -6 213.768 25.9647  15
  -2   2  -6 246.105 30.3418  15
   2   2   6 249.949 34.7586   3
   2  -2   6 231.692 34.8186   3
  -2  -2  -6 237.260 31.5437  12
  -2   2  -6 157.733 30.0722   4
   2   2   7 1347.31 145.863   3
   2  -2   7 1283.23 145.156   3
  -2   2  -7 1368.63 139.656   4
  -2   2  -7 1329.58 143.466   9
  -2   2  -7 1500.99 140.665  15
   2   2   8 1992.33 236.302   3
   2  -2   8 2106.50 237.249   3
  -2   2  -8 2398.72 236.685   9
  -2   2  -8 2718.18 233.260  15
   2   2   9 1045.42 137.051   3
   2  -2   9 1003.53 136.635   3
  -2  -2  -9 1388.94 140.718   9
  -2   2  -9 1308.51 138.373   9
  -2   2  -9 1577.66 134.989  15
   2   2  10 423.982 64.0330   3
  -2  -2 -10 469.027 64.2604   9
  -2   2 -10 502.086 64.4295   9
   2  -2  10 352.180 61.5302   3
  -2   2 -10 489.347 58.5389  15
  -2  -2 -11 522.449 78.9238   9
  -2   2 -11 616.488 81.3840   9
   2   2  11 458.225 78.2496   3
   2  -2  11 462.815 78.6100   3
  -2   2 -11 640.722 75.4489  15
  -2   2 -11 946.836 93.8328  13
  -2  -2 -11 888.735 90.5296  13
  -2   2 -12 286.881 47.8216  15
   2  -3 -13 71.1752 28.6313   9
   2   3 -12 1942.61 184.443   9
   2  -3 -12 1606.34 185.945   9
  -2  -3  12 1494.79 184.941   3
  -2   3  12 1260.79 181.190   3
   2  -3 -12 1706.49 185.368  12
   2  -3 -12 2593.76 195.989  13
   2   3 -12 2421.95 197.169  13
   2  -3 -11 53.2979 24.7483   9
   2  -3 -11 96.8167 27.1166  12
   2   3 -11 193.462 38.4122  13
   2  -3 -11 206.833 34.7691  13
  -2   3  11 89.3068 25.9177   3
  -2  -3  11 70.4990 25.7774   3
   2   3 -11 118.909 25.1412   9
   2   3 -10 1090.37 109.312  15
   2   3 -10 1049.98 104.697   9
   2   3 -10 1212.55 113.383  13
   2  -3 -10 1120.35 110.693  13
  -2  -3  10 846.433 106.613   3
  -2   3  10 751.926 104.530   3
   2  -3 -10 883.652 105.837  12
   2   3  -9 55.8999 14.9496   9
  -2  -3   9 64.5137 18.0013   4
   2   3  -9 37.4481 19.3752  13
   2  -3  -9 25.4243 17.6107  12
   2  -3  -9 49.6093 21.4724  13
  -2  -3   9 20.4851 14.6807   3
  -2   3   9 30.8194 15.5354   3
   2   3  -9 41.1072 18.8117  15
   2  -3  -8 69.4456 14.5915   1
   2   3  -8 79.6410 21.1523  15
   2   3  -8 62.5037 14.8785   9
  -2   3   8 72.9791 17.7362   3
  -2  -3   8 65.9500 17.9016   3
   2   3  -8 93.1863 21.6850  13
   2  -3  -8 65.0910 19.8194  13
  -2  -3   8 90.8164 20.9166   4
   2   3  -7 587.927 57.6413  15
  -2  -3   7 403.815 55.1055   3
  -2   3   7 486.180 56.2230   3
  -2  -3   7 522.136 54.6448   1
  -2  -3   7 508.149 59.2314   4
  -2   3   7 363.249 48.6288   4
   2   3  -7 567.214 53.7729   9
   2   3  -7 497.732 57.2796  13
   2  -3  -7 578.263 58.0998  13
  -2  -3   7 611.576 53.6181  12
  -2  -3   6 4575.97 385.510  12
  -2   3   6 3327.70 385.358  15
  -2  -3   6 3584.45 388.039   3
  -2   3   6 3785.09 387.909   3
  -2  -3   6 4168.30 388.097   1
  -2   3   6 3440.08 384.604   4
  -2  -3   6 4608.40 394.435   4
   2   3  -6 4328.13 385.987   9
   2  -3  -6 4714.78 389.996  13
   2   3  -6 4398.31 389.605  13
  -2   3   6 4043.42 384.433   2
  -2  -3   5 134.336 20.4740  15
  -2   3   5 169.025 22.9585   3
  -2  -3   5 164.599 22.7879   3
  -2  -3   5 155.505 22.7992   1
   2  -3  -5 185.900 23.2912  13
  -2  -3   5 211.684 20.6566  12
   2  -3  -5 169.700 24.5028  12
  -2  -3   5 218.569 27.0757  11
  -2  -3   5 185.360 22.0512  10
   2   3  -5 145.195 20.0360   9
  -2   3   5 139.142 21.0780   4
  -2  -3   5 194.421 28.0452   4
  -2   3   5 169.791 19.5214   2
  -2   3   4 8319.64 745.468   2
  -2  -3   4 8195.57 745.089  12
   2  -3  -4 7285.99 749.800  12
  -2   3   4 6490.62 743.683  11
  -2   3   4 8633.47 747.273  10
  -2  -3   4 9056.61 747.149  10
  -2  -3   4 8702.55 745.265   9
   2   3  -4 8415.28 746.115   9
  -2  -3   4 8378.84 750.918   1
  -2  -3   4 8160.26 748.614   3
  -2   3   4 7500.66 747.785   3
  -2  -3   4 6995.03 745.861  15
  -2  -3   4 9638.53 754.898   4
  -2   3   4 7616.74 748.624   4
  -2   3   3 1542.93 176.165  13
  -2  -3   3 1653.74 176.459  13
   2  -3  -3 1755.15 180.449  12
  -2  -3   3 1816.08 174.460  12
  -2   3   3 2274.21 177.670  10
  -2  -3   3 2231.84 177.133  10
  -2  -3   3 1922.36 175.217   9
  -2  -3   3 2110.31 183.096   4
  -2  -3   3 1811.08 176.100  15
   2   3  -3 1842.24 177.293  15
  -2  -3   3 1550.32 177.123   3
  -2   3   3 1674.35 177.223   3
   2   3  -2 4683.04 498.090  11
   2  -3  -2 4802.18 492.224  11
  -2   3   2 5645.33 494.536  10
   2  -3  -2 5091.88 493.132  10
   2   3  -2 5663.80 493.630  10
  -2  -3   2 5066.28 493.715  10
   2  -3  -2 5075.50 494.310   2
  -2  -3   2 4690.23 493.508  13
  -2  -3   2 4812.54 492.750  15
   2   3  -2 5269.59 493.811  15
  -2   3   2 5863.07 492.040   6
  -2  -3   1 1406.50 129.066   6
  -2  -3   1 1264.70 122.692  12
  -2  -3   1 1176.62 128.656  11
   2   3  -1 1438.78 125.314  10
   2  -3  -1 1172.65 124.251  10
   2  -3  -1 1352.58 124.876   1
   2   3  -1 1189.21 131.331   8
   2   3  -1 1178.39 130.179   7
  -2   3   1 1264.95 125.396   8
   2   3  -1 1324.49 123.850  15
  -2  -3   1 1236.40 123.211  15
  -2  -3   1 1446.21 126.126   2
  -2  -3   0 69.4300 8.43665  12
   2   3   0 65.5945 8.71295  12
   2   3   0 68.8049 9.45539   2
  -2   3   0 64.1583 11.6931   3
  -2  -3   0 54.3661 10.1774   3
  -2   3   0 62.8020 11.6252   5
  -2  -3   0 68.2453 11.2684   5
  -2  -3   0 55.8311 9.94652   2
   2  -3   0 72.9431 9.91046   1
   2  -3   0 68.1887 9.92950   8
   2   3   0 48.7739 14.8323   8
   2  -3   0 18.9189 9.92566  14
  -2   3   0 83.4590 14.5150   4
   2   3   0 66.8822 12.7943   6
  -2   3   0 50.6864 12.2474   7
  -2  -3   0 74.3976 15.0317   6
   2   3   0 48.1719 14.6714   7
  -2  -3  -1 35.1359 7.57151   3
  -2   3  -1 14.8436 7.57469   3
   2  -3   1 24.4400 6.31427   1
   2   3   1 21.7528 5.21934   2
  -2   3  -1 13.8369 6.11478   1
   2  -3   1 26.4789 8.43066  14
  -2  -3  -1 16.9690 5.09398  12
   2   3   1 26.8120 5.82741  12
   2   3   1 24.9571 9.36338  11
   2   3   1 26.9198 10.4437   6
   2  -3   1 15.9733 7.84421   5
   2   3   1 26.5539 8.99228   5
  -2  -3  -2 2814.13 304.870  12
   2   3   2 3274.64 304.628  12
  -2   3  -2 3194.33 311.431   4
   2   3   2 2908.96 309.451   5
   2  -3   2 2680.72 307.424   5
   2  -3   2 3684.03 308.973   9
  -2   3  -2 2885.20 305.175   1
   2   3   2 3059.38 304.783   2
   2   3   2 3321.68 309.487   3
  -2  -3  -2 3794.94 306.867   3
  -2   3  -2 4054.40 308.645   3
   2  -3   2 2908.18 307.495   3
   2  -3   2 2883.30 306.690  14
   2  -3   2 3492.76 306.840   7
  -2   3  -3 2047.98 212.714   4
  -2   3  -3 2122.41 209.965   9
   2  -3   3 2393.36 208.940   9
  -2   3  -3 1997.83 206.369   1
  -2  -3  -3 1806.36 206.037  12
  -2  -3  -3 2725.61 208.850   3
   2   3   3 2071.92 210.107   3
   2  -3   3 1982.57 208.796   3
  -2   3  -4 6521.12 670.180   9
  -2  -3  -4 7967.14 667.066   4
  -2   3  -4 5781.43 671.646   4
   2   3   4 6441.82 670.446   3
   2  -3   4 6888.94 670.308   3
  -2   3  -4 8816.47 671.057   3
  -2  -3  -4 7748.92 668.491   3
  -2  -3  -4 5517.21 666.702  12
  -2   3  -4 7244.20 668.940  15
  -2   3  -5 373.200 41.6056   9
  -2  -3  -5 348.596 35.0412   4
  -2   3  -5 272.535 41.5510   4
   2   3   5 291.877 39.7690   3
   2  -3   5 265.651 38.4525   3
  -2  -3  -5 313.624 37.9303  12
  -2   3  -5 372.996 38.9608  15
   2   3   5 246.946 31.4538  15
  -2  -3  -6 3233.39 312.964   9
  -2   3  -6 3728.25 313.917   9
  -2   3  -6 3285.07 313.182   4
   2   3   6 3537.44 314.347   3
   2  -3   6 3100.40 312.071   3
  -2  -3  -6 3074.87 309.691  12
  -2   3  -6 4269.39 311.692  15
   2   3   6 2594.10 301.949  15
  -2   3  -7 804.766 85.0463   9
  -2  -3  -7 639.114 83.4447   9
  -2   3  -7 659.240 81.5527   4
   2   3   7 656.890 83.6790   3
   2  -3   7 697.935 84.1153   3
  -2  -3  -7 727.224 82.3792  12
  -2   3  -7 928.746 82.9528  15
  -2   3  -8 313.958 46.5893   9
   2   3   8 260.121 45.5260   3
   2  -3   8 270.300 46.0285   3
  -2   3  -9 5.54193 17.1073  15
   2   3   9 8.39636 19.5867   3
   2  -3   9 20.8512 20.2496   3
  -2   3  -9 3.90316 18.2131   9
  -2  -3 -10 311.479 54.3924   9
  -2   3 -10 412.408 53.1809  15
   2   3  10 288.835 53.3690   3
   2  -3  10 369.304 56.7112   3
  -2   3 -10 413.920 57.6324   9
  -2   3 -11 24.2646 25.1963   9
  -2   3 -11 45.1786 26.1441  15
  -2  -3 -11 25.4361 25.4782   9
   2   3  11 96.3043 30.0057   3
   2  -3  11 15.4135 27.5203   3
  -2   3 -11 61.1830 33.8544  13
  -2  -3 -11 65.9311 30.7164  13
   2  -4 -12 62.5953 27.9632   9
   2   4 -12 119.949 27.4117   9
  -2   4  12 63.6191 26.2949   3
  -2  -4  12 51.2026 24.9845   3
   2  -4 -12 33.7586 24.0693  12
   2   4 -12 131.362 38.6798  13
   2  -4 -12 104.073 32.1506  13
   2   4 -11 956.030 100.401   9
   2   4 -11 866.660 103.717  15
  -2   4  11 749.958 100.417   3
  -2  -4  11 732.887 100.890   3
   2  -4 -11 1076.97 106.706  13
   2   4 -11 1134.98 110.317  13
  -2   4  11 915.754 93.2368   2
  -2   4  10 2.80697 8.87112   2
   2   4 -10 24.7735 22.5929  13
   2  -4 -10 9.59055 19.4817  13
   2   4 -10-2.54886 13.7269   9
   2   4 -10 6.67014 20.8130  15
  -2   4  10 12.8652 16.7679   3
  -2  -4  10 3.40543 16.8427   3
  -2  -4   9 2649.07 265.579   4
   2   4  -9 2601.17 260.854   9
   2   4  -9 2807.03 266.257  15
  -2   4   9 2280.65 261.752   3
  -2  -4   9 2341.54 262.691   3
   2   4  -9 3267.09 268.584  13
   2  -4  -9 3112.77 266.192  13
  -2   4   9 2558.42 255.898   2
  -2  -4   8 7.36290 11.9643   3
  -2   4   8 23.3760 12.2380   3
   2   4  -8 7.54564 10.9801   9
   2   4  -8 10.2946 15.1399  15
  -2  -4   8-3.35923 15.0366   4
  -2  -4   8 34.5242 13.6681   1
   2   4  -8 5.21863 14.5232  13
   2  -4  -8 14.5603 14.4664  13
  -2  -4   7 4696.04 385.030  12
   2  -4  -7 3581.44 388.933  12
  -2  -4   7 5222.08 399.402   4
  -2   4   7 3329.90 382.390   4
   2   4  -7 4367.16 386.140   9
  -2  -4   7 4184.20 388.252   1
  -2   4   7 3550.52 386.637   3
  -2  -4   7 3543.50 386.998   3
  -2   4   7 3750.85 381.550   2
   2  -4  -7 4788.32 389.976  13
   2   4  -7 4710.72 390.498  13
  -2  -4   6 296.211 34.4803  12
   2  -4  -6 310.594 39.8218  12
  -2  -4   6 303.529 38.7941   1
  -2   4   6 283.631 36.5077   4
  -2  -4   6 366.176 46.1453   4
   2   4  -6 344.140 36.6998   9
  -2  -4   6 294.523 38.0588   3
  -2   4   6 349.336 38.6040   3
   2  -4  -6 349.444 38.8945  13
   2   4  -6 353.757 39.3150  13
  -2   4   6 279.929 32.5385   2
  -2   4   5 877.482 86.1444   2
  -2  -4   5 887.914 87.1108  12
   2  -4  -5 932.778 93.9117  12
  -2   4   5 799.135 85.7128  11
  -2  -4   5 909.062 88.4787  10
  -2  -4   5 952.472 87.7442   9
   2   4  -5 984.889 91.5334  15
  -2  -4   5 839.585 90.1386   3
  -2   4   5 870.082 90.0541   3
  -2   4   5 690.479 90.0423   4
  -2  -4   5 1111.72 101.344   4
  -2  -4   5 1012.60 94.4424   1
   2  -4  -4 184.334 24.8523  12
  -2  -4   4 157.636 18.4616  12
  -2   4   4 180.484 17.8949  11
  -2  -4   4 187.635 29.2234   4
  -2  -4   4 219.239 20.7614  10
  -2   4   4 158.650 19.8141  10
  -2  -4   4 181.933 19.6342   9
  -2  -4   4 163.545 21.2522   3
  -2   4   4 126.965 20.1541   3
  -2   4   4 90.7891 21.3746   4
  -2  -4   4 178.821 25.5772   1
  -2  -4   4 147.094 19.8364  15
  -2   4   3 1101.97 121.819  13
  -2  -4   3 1103.09 122.031  13
   2  -4  -3 1123.28 126.831  12
  -2  -4   3 1723.44 135.490   4
  -2   4   3 963.761 125.905   4
  -2   4   3 1576.07 124.023  10
  -2  -4   3 1567.87 123.331  10
  -2  -4   3 1449.22 123.608   9
  -2  -4   3 1269.24 123.376   3
  -2   4   3 1143.11 122.682   3
   2   4  -3 1338.75 123.991  15
  -2  -4   3 1148.51 122.078  15
   2  -4  -3 1240.65 120.823   2
   2  -4  -2 446.432 43.6063  11
  -2  -4   2 414.468 43.6339  10
  -2   4   2 529.904 45.2743  10
   2  -4  -2 460.025 42.9708  10
   2   4  -2 478.447 43.3226  10
   2  -4  -2 392.116 44.4549   2
   2   4  -2 480.262 44.5267  15
  -2  -4   2 378.929 42.8824  15
  -2   4   2 444.011 48.8388   8
  -2   4   2 369.704 48.8327   4
  -2  -4   2 384.486 42.9101  13
  -2   4   2 380.026 49.4457  14
  -2   4   2 368.296 42.6526  13
  -2  -4   1 5905.08 576.270   2
   2   4  -1 5984.11 574.422  15
  -2   4   1 5528.27 577.325   8
   2   4  -1 4986.40 582.622   8
   2   4  -1 4324.92 581.412   7
   2  -4  -1 6073.84 576.883   1
  -2   4   1 6557.30 581.214  14
  -2  -4   1 5639.83 573.893  12
   2  -4  -1 6955.90 576.444  11
  -2  -4   1 7146.33 582.645  11
   2  -4  -1 6274.53 574.589  10
   2   4  -1 7012.93 575.223  10
  -2   4   1 5217.32 581.264   4
  -2  -4   1 5940.21 579.585   6
   2  -4   0 1099.06 98.1576   1
   2   4   0 990.133 93.8498  15
   2  -4   0 1126.23 99.9408   8
   2   4   0 945.111 107.617   8
  -2  -4   0 1056.22 96.3853   3
  -2   4   0 1223.27 98.4671   3
  -2  -4   0 912.252 94.2112  14
   2  -4   0 337.566 96.1733  14
  -2  -4   0 943.613 95.3206  12
  -2  -4   0 1362.09 106.617  11
   2   4   0 1138.81 103.067  11
  -2   4   0 1042.55 104.544   4
  -2  -4   0 1056.88 97.4922   5
  -2   4   0 1130.37 99.4796   5
  -2  -4   0 1101.97 97.2170   2
   2   4   0 692.882 104.221   7
  -2  -4   0 1206.14 105.809   6
   2   4   0 1073.05 100.129   6
  -2   4   0 831.073 102.058   7
   2  -4   1 11361.6 947.900   8
  -2   4  -1 8902.62 949.245   7
   2   4   1 9331.77 959.690   8
   2  -4   1 8043.68 948.251  14
  -2  -4  -1 8704.56 945.622  12
   2   4   1 10453.4 946.594  12
   2   4   1 10451.8 952.235  11
  -2  -4  -1 11614.1 952.997   4
   2  -4   1 12293.4 953.655   9
  -2  -4  -1 10472.4 946.192   3
  -2   4  -1 11815.9 948.127   3
   2  -4   1 9914.59 947.578   1
   2   4   1 9225.88 944.380   2
   2   4   1 9547.81 951.139   6
   2  -4   2 64.6460 13.8048   3
   2   4   2 82.1908 10.0897   2
  -2   4  -2 93.0588 14.6660   3
   2   4   2 81.7561 15.9781   3
  -2  -4  -2 77.8171 12.8451   3
  -2   4  -2 43.9761 12.5835   1
  -2   4  -2 57.7313 17.9042   4
   2  -4   2 33.4762 12.4437  14
  -2  -4  -2 74.2251 12.2216  12
   2   4   2 99.0884 12.8700  12
   2   4   2 77.8010 16.9143  11
   2  -4   2 89.9317 16.5650   9
   2   4   2 48.4636 15.7884   6
   2  -4   2 69.8467 14.9412   7
   2   4   2 94.5341 17.0260   5
   2  -4   2 83.0281 14.8749   5
  -2  -4  -2 114.039 17.2497   4
  -2   4  -3 2237.37 250.696   4
  -2  -4  -3 3419.49 249.281   4
   2   4   3 2377.01 246.694   5
   2  -4   3 2314.22 245.133   5
   2  -4   3 2333.21 243.031   1
   2   4   3 2212.10 239.722   2
  -2   4  -3 2307.10 246.142   9
   2  -4   3 2953.42 246.698   9
   2   4   3 2562.17 246.533   3
   2  -4   3 2438.79 244.739   3
  -2  -4  -3 2771.84 242.657   3
   2  -4   3 2786.44 245.012   7
  -2  -4  -3 2028.83 241.728  12
   2   4   3 2746.52 242.486  12
  -2   4  -3 2757.79 246.170  15
  -2  -4  -4 51.6439 12.0214  12
  -2   4  -4 42.6187 13.6344   9
  -2  -4  -4 49.8001 12.0077   3
   2   4   4 23.2450 12.2676   3
  -2   4  -4 64.3930 14.4769   3
   2  -4   4 35.4610 13.1165   3
  -2   4  -4 37.7385 17.1887   4
  -2  -4  -4 44.6014 13.6099   4
   2  -4   4 61.6974 13.3047   7
  -2   4  -4 44.5865 13.3532  15
  -2  -4  -5 57.8705 14.3411   4
  -2   4  -5 47.1871 15.6866   9
  -2   4  -5 43.2781 15.4366  15
   2   4   5 41.1389 8.76269  15
  -2  -4  -5 62.2239 14.3229  12
   2   4   5 52.9876 16.6214   3
   2  -4   5 67.7826 16.3137   3
  -2   4  -6 331.096 42.9184  15
   2   4   6 296.305 43.5934   3
   2  -4   6 306.697 43.5512   3
  -2   4  -6 342.530 44.5329   9
  -2  -4  -6 281.012 41.3581  12
  -2  -4  -6 361.870 37.3331   4
  -2   4  -7 2655.39 252.835   9
  -2  -4  -7 2238.47 252.215   9
   2   4   7 2376.71 251.618   3
   2  -4   7 2461.51 251.560   3
  -2  -4  -7 2143.39 248.409  12
  -2   4  -7 3208.37 251.982  15
  -2   4  -8 39.1768 19.8468  15
  -2  -4  -8 23.9808 17.9487   9
  -2   4  -8 14.5690 17.0950   9
   2  -4   8 25.5666 15.6697   3
   2   4   8 22.5187 17.6082   3
  -2  -4  -8 6.39432 16.5036  12
   2   4   9 1791.74 211.511   3
   2  -4   9 1914.00 212.766   3
  -2   4  -9 1988.64 213.157   9
  -2   4  -9 2517.44 212.451  15
  -2   4 -10-4.43824 22.3500   9
  -2   4 -10 23.5349 24.1558  15
  -2  -4 -10 3.80516 25.3474  13
   2  -4  10 4.57879 23.0574   3
   2   4  10 4.57098 23.4253   3
   2  -4  11 814.790 122.100   3
   2   4  11 812.135 121.249   3
  -2   4 -11 1114.30 122.224  15
  -2   4 -11 1516.91 135.545  13
  -2  -4 -11 1507.95 129.785  13
  -2   4 -11 1019.58 124.670   9
  -2   5  12 647.434 93.9665   3
  -2  -5  12 605.210 93.8752   3
   2   5 -12 1162.68 108.250  13
   2  -5 -12 1228.26 105.812  13
   2   5 -11 356.177 46.3643   9
   2   5 -11 377.051 56.2042  15
  -2   5  11 257.181 45.6341   3
  -2  -5  11 238.876 46.1784   3
   2  -5 -11 330.166 50.6154  13
   2   5 -10 376.478 48.6980   9
   2   5 -10 331.916 54.1757  15
  -2   5  10 319.331 49.5950   3
  -2  -5  10 346.841 52.3633   3
   2  -5 -10 320.514 51.6789  12
   2   5 -10 455.430 56.4189  13
  -2  -5   9 7.50689 17.8831   4
   2  -5  -9 21.5586 18.5153  13
   2  -5  -9-9.89537 14.7531  12
   2   5  -9 2.96399 18.0841  13
  -2   5   9 13.6705 16.8875   3
  -2  -5   9 34.6912 16.5328   3
   2   5  -9 11.2216 13.7086   9
  -2   5   8 21.0619 14.4775   3
  -2  -5   8 29.5231 13.8792   3
  -2   5   8 7.22978 9.23057  11
   2   5  -8 27.6925 12.8733   9
  -2  -5   8 39.9761 22.3201   4
   2  -5  -8 54.3239 18.7784  12
   2   5  -8 55.5310 18.9249  13
   2  -5  -8 63.0724 18.0948  13
  -2   5   8 25.5719 7.16128   2
  -2  -5   8 20.1814 15.7573   1
  -2  -5   7 6.04964 11.6728   3
  -2   5   7 7.70241 9.52271   3
  -2  -5   7 10.3456 8.78994  12
   2   5  -7 2.11254 12.8720  13
   2  -5  -7 12.0104 13.3336  13
   2  -5  -7-2.73794 12.2206  12
  -2   5   7 4.58104 7.96113   4
  -2  -5   7-16.4480 19.1675   4
  -2   5   7 11.6479 7.67500  11
   2   5  -7-3.50862 9.73535   9
   2   5  -7 2.36190 14.7376  15
  -2  -5   7 7.39075 13.0525   1
  -2   5   7-0.61000 4.93044   2
  -2  -5   6 2305.04 207.984  12
   2  -5  -6 1774.12 212.598  12
  -2   5   6 1982.64 205.661  11
  -2  -5   6 2490.58 224.098   4
  -2   5   6 1770.41 210.635   4
  -2  -5   6 2341.79 208.634   9
   2   5  -6 2412.30 212.129  13
  -2   5   6 1962.80 209.958   3
  -2  -5   6 2141.48 211.044   3
   2   5  -6 2372.07 213.522  15
  -2  -5   6 2462.79 215.903   1
  -2  -5   5 1197.40 121.548   1
   2  -5  -5 958.558 118.670  12
  -2  -5   5 1200.28 113.342  12
  -2  -5   5 1330.96 114.492  10
  -2  -5   5 1251.78 114.588   9
  -2   5   5 1144.34 112.168  11
  -2  -5   5 1059.69 115.535   3
  -2   5   5 1125.82 115.487   3
   2   5  -5 1283.62 118.309  15
  -2  -5   5 1263.33 128.494   4
  -2   5   5 811.503 116.543   4
  -2  -5   4 5925.34 517.782   4
  -2   5   4 4012.19 507.043   4
  -2   5   4 5701.50 502.986  10
  -2  -5   4 6210.82 502.922  10
  -2  -5   4 5724.19 503.810   9
  -2  -5   4 5093.39 503.469   3
  -2   5   4 4927.18 503.018   3
   2   5  -4 5562.94 505.660  15
   2  -5  -4 4549.15 507.501  12
  -2  -5   4 4854.81 501.564  12
   2  -5  -3 370.004 49.4725  12
  -2   5   3 368.772 51.3000   4
  -2  -5   3 557.739 59.2361   4
  -2   5   3 483.689 45.3714  10
  -2  -5   3 480.403 44.6054  10
  -2  -5   3 445.064 47.3133   9
  -2   5   3 453.331 54.1785   8
  -2  -5   3 381.481 44.7778  15
  -2  -5   3 418.738 44.9846   3
  -2   5   3 406.065 44.4951   3
   2  -5  -3 430.064 42.6186   2
  -2  -5   2 4554.49 415.252   6
  -2  -5   2 5492.21 419.710  11
   2  -5  -2 4864.55 412.431  11
  -2   5   2 3747.02 418.204   4
  -2   5   2 4222.40 409.942   3
  -2  -5   2 4330.12 410.372   3
  -2   5   2 4208.91 417.701   8
   2   5  -2 4440.20 411.719  15
  -2   5   2 4052.95 409.309  13
  -2  -5   2 4121.66 409.505  13
  -2  -5   1 1370.20 130.370   2
   2  -5  -1 1382.48 132.159   1
   2   5  -1 1307.74 128.379  15
   2   5  -1 916.740 136.819   7
  -2   5   1 1354.34 133.283   8
  -2  -5   1 1141.08 127.958  14
  -2  -5   1 1223.59 128.266  12
   2  -5  -1 1576.75 131.690  11
   2   5  -1 1502.15 138.252  11
  -2  -5   1 1558.96 137.376  11
   2   5  -1 1425.68 127.306  10
   2  -5  -1 1343.03 127.100  10
  -2   5   1 1186.80 137.282   4
  -2  -5   1 1179.54 128.681   5
  -2   5   1 1458.78 131.224   5
  -2  -5   1 1435.17 134.877   6
  -2  -5   0 37.6976 6.96719   2
   2   5   0 10.3937 4.09669  15
   2  -5   0 13.0525 9.40502   8
  -2   5   0 3.00101 11.7864   4
   2  -5   0-9.82200 13.6345  14
  -2  -5   0 3.26489 4.20701  14
  -2   5   0 12.3571 10.6131   7
  -2  -5   0-2.51766 10.1789   6
   2   5   0 4.19792 11.9958   7
  -2  -5   0 4.17200 4.99093  12
   2   5   0-4.59325 9.02755  11
  -2  -5   0 9.56300 10.6843  11
   2   5   0 1.60217 4.67162  10
   2  -5   0 1.28812 4.37094  10
  -2  -5   0-2.87869 9.50506   4
  -2  -5   0 13.6448 4.72366   3
  -2   5   0 16.1226 6.00656   3
  -2  -5  -1 549.133 66.6042  12
   2   5   1 660.073 72.6651  11
   2   5   1 614.873 63.2677  15
   2  -5   1 796.081 71.2210   8
  -2   5  -1 624.636 72.8568   7
   2  -5   1 886.124 76.7754   9
  -2   5  -1 769.750 73.1510  14
   2  -5   1 638.498 71.0199  14
  -2  -5  -1 707.664 66.1734   3
  -2   5  -1 795.932 67.6920   3
   2   5   1 655.725 71.1341   6
   2   5   2 1408.63 155.837   5
   2   5   2 1539.70 157.355   6
   2  -5   2 1262.76 152.915   5
  -2  -5  -2 1363.88 152.244  12
  -2  -5  -2 1713.82 151.267   3
  -2   5  -2 1860.82 152.798   3
   2  -5   2 1553.32 154.440   1
   2   5   2 1630.34 157.996  11
   2  -5   3 123.083 21.3271   7
   2   5   3 92.6643 22.3606   6
  -2  -5  -3 92.8223 17.2472  12
   2  -5   3 101.000 18.7208   5
   2   5   3 116.867 20.8945   5
   2   5   3 87.5945 19.6045  11
  -2  -5  -3 141.140 17.1506   3
   2  -5   3 106.977 18.4316   1
   2   5   3 99.5958 12.3046   2
   2   5   3 105.506 20.2696   3
   2  -5   3 116.470 18.7924   3
   2   5   4 3710.83 392.614   2
   2   5   4 4274.43 403.399  11
   2  -5   4 3663.71 399.634   5
   2   5   4 3730.92 401.430   5
  -2   5  -4 4087.01 403.600   9
   2  -5   4 4035.06 399.262   1
   2   5   4 4339.66 402.439   3
   2  -5   4 3945.40 399.659   3
  -2   5  -4 5634.28 401.354   3
  -2  -5  -4 5551.15 399.160   3
  -2  -5  -4 3386.36 397.806  12
  -2   5  -4 4725.10 403.311  15
  -2  -5  -5 1660.61 138.540   4
  -2   5  -5 1305.34 137.293   9
   2   5   5 1227.73 127.585   2
   2   5   5 1183.47 135.604   3
   2  -5   5 1266.28 135.024   3
  -2  -5  -5 1253.29 133.646  12
  -2   5  -5 1508.17 137.363  15
  -2   5  -6 2323.62 250.461   9
  -2  -5  -6 2980.21 246.795   4
   2   5   6 2460.32 250.601   3
   2  -5   6 2276.97 248.625   3
  -2  -5  -6 2073.07 246.932  12
  -2   5  -6 2903.93 251.519  15
  -2   5  -7 60.8519 22.3946   9
  -2   5  -7 89.5900 23.6733  15
   2   5   7 80.6363 23.3885   3
   2  -5   7 63.0124 22.2618   3
  -2  -5  -7 68.9296 21.8454  12
  -2   5  -8 266.845 43.5733   9
  -2   5  -8 400.094 47.1061  15
  -2  -5  -8 237.799 43.9583   9
   2  -5   8 285.374 44.6456   3
   2   5   8 272.094 44.3042   3
  -2  -5  -8 231.815 40.1234  12
  -2   5  -9 12.2069 19.3627   9
  -2   5  -9 17.1271 23.5062  15
  -2  -5  -9 28.0693 21.8107   9
   2   5   9-20.6278 24.5175   3
   2  -5   9 4.00651 21.2293   3
  -2  -5  -9 3.71218 16.9453  12
  -2   5 -10 180.895 38.0413   9
  -2   5 -10 162.343 37.3487  15
   2   5  10 153.956 37.1629   3
   2  -5  10 80.3579 32.5691   3
  -2   5 -10 253.849 44.7237  13
  -2  -5 -10 251.254 40.5366  13
  -2  -5 -11 471.551 64.0098  13
  -2   5 -11 409.766 65.0307   9
  -2  -6  12-3.97154 22.6786   3
  -2   6  12-7.27820 18.6536   3
   2  -6 -11 400.483 66.9374  12
   2   6 -11 787.416 79.4919  15
   2   6 -11 786.787 76.8679  13
  -2   6  11 447.927 64.1790   3
  -2  -6  11 447.329 65.5709   3
   2  -6 -10 480.235 67.7229  12
  -2  -6  10 565.615 67.7445   3
  -2   6  10 426.108 63.5168   3
  -2  -6   9 1309.81 125.637   4
   2  -6  -9 888.107 114.103  12
   2   6  -9 1073.24 114.192  13
  -2  -6   9 1022.56 112.806   3
  -2   6   9 975.853 111.324   3
  -2  -6   9 1175.11 115.584   1
   2   6  -8 1062.47 104.789  13
   2  -6  -8 1010.19 107.848  12
  -2   6   8 853.029 95.2926  11
  -2   6   8 893.383 101.828   3
  -2  -6   8 987.693 103.141   3
  -2  -6   8 1175.75 117.461   4
   2   6  -8 1056.86 107.279  15
  -2  -6   8 1110.86 107.143   1
   2  -6  -7 919.491 124.621  12
  -2  -6   7 1259.82 136.145   4
  -2   6   7 1247.24 117.422  11
  -2  -6   7 1143.00 122.424   3
  -2   6   7 1082.34 121.525   3
  -2  -6   7 1334.72 128.967   1
   2   6  -7 1499.95 128.713  15
   2  -6  -6 1146.87 140.907  12
  -2  -6   6 1528.84 135.553  12
  -2   6   6 1507.53 133.794  11
  -2   6   6 1085.00 138.908   4
  -2  -6   6 1628.00 155.476   4
  -2  -6   6 1440.15 136.518   9
  -2   6   6 1124.65 135.815   3
  -2  -6   6 1240.05 136.585   3
  -2  -6   6 1631.00 145.827   1
   2   6  -6 1508.81 141.633  15
  -2  -6   5 31.2697 10.0075   3
  -2   6   5 35.2914 10.2224   3
  -2  -6   5 36.1385 9.18836  12
   2  -6  -5 41.3957 14.9364  12
  -2  -6   5 13.4122 17.8494   4
  -2   6   5 41.9223 15.1171   4
  -2  -6   5 40.5058 9.46876  10
  -2  -6   5 25.4657 9.94156   9
   2   6  -5 34.6828 13.3813  15
  -2  -6   5 62.1291 18.5418   1
  -2  -6   4 2.07083 6.55984   3
  -2   6   4 4.98750 6.80192   3
  -2   6   4-1.28188 5.68432   6
   2  -6  -4 2.43670 10.3839  12
  -2  -6   4 7.57489 5.46150  10
  -2   6   4 22.4611 7.45530  10
  -2  -6   4 10.4966 8.09096   9
  -2   6   4 14.0190 14.1588   8
  -2  -6   4 4.27755 16.2892   4
   2   6  -4 9.74777 10.2692  15
   2   6  -3 186.142 24.3088  15
   2  -6  -3 158.558 27.0221  12
  -2   6   3 219.392 22.7356  10
  -2  -6   3 145.634 21.2956  10
  -2  -6   3 210.791 26.7918   9
  -2   6   3 262.044 29.6576  14
  -2  -6   3 165.916 33.2390   4
  -2   6   3 211.427 32.4386   8
  -2  -6   3 199.736 21.5904   3
  -2   6   3 164.661 20.8340   3
   2  -6  -2 762.038 66.2326  11
  -2  -6   2 743.990 79.0586   4
  -2  -6   2 679.612 61.3342   3
  -2   6   2 583.466 60.8540   3
  -2  -6   2 675.878 67.5754   6
  -2   6   2 663.577 71.3558   8
  -2   6   2 728.843 69.9745  14
  -2  -6   2 517.180 62.4854  14
  -2   6   1 2088.47 209.044  13
  -2   6   1 2768.07 220.787  14
  -2  -6   1 1992.83 211.520  14
  -2  -6   1 2066.80 208.872  13
  -2  -6   1 2135.47 211.894  12
   2  -6  -1 2666.04 215.685  11
   2   6  -1 2532.96 222.734  11
  -2  -6   1 2403.58 213.631   2
  -2  -6   1 1854.66 209.131   3
  -2   6   1 2662.78 210.473   3
  -2  -6   1 2405.25 209.528   3
   2   6  -1 1505.19 222.113   7
   2   6  -1 2364.81 211.997  15
  -2  -6   1 2372.75 218.639   6
  -2  -6   0 4435.37 419.170   2
   2   6   0 4603.07 417.414  15
   2  -6   0 5487.90 429.401   8
   2  -6   0 5055.65 424.379   1
  -2  -6   0 2288.97 416.966  14
  -2   6   0 6192.87 428.998  14
  -2  -6   0 4176.23 419.185  12
   2  -6   0 5312.05 423.184  11
   2   6   0 4766.82 428.305  11
   2  -6   0 4756.33 416.385  10
   2   6   0 5492.70 417.059  10
  -2   6   0 5204.19 417.205   3
  -2  -6   0 3981.45 416.015   3
  -2  -6   0 5194.92 434.567   4
  -2   6   0 3650.26 429.498   7
  -2  -6   0 2574.45 422.452   6
   2   6   0 3305.05 432.383   7
  -2  -6  -1 1915.90 207.887  12
   2   6   1 2308.49 215.461  11
  -2  -6  -1 2470.41 221.289   4
  -2   6  -1 2403.67 206.208   3
  -2  -6  -1 2132.37 205.222   3
   2   6   1 2042.34 204.062  15
  -2   6  -1 1594.81 213.773   7
   2  -6   1 2456.36 213.878   8
   2  -6   1 2181.86 211.681   1
   2   6   1 2313.83 211.251   6
  -2  -6  -2 1133.48 136.987  12
   2   6   2 1220.66 141.472  11
  -2  -6  -2 1490.95 148.296   4
  -2  -6  -2 1441.05 135.200   3
  -2   6  -2 1515.72 136.309   3
  -2   6  -2 1629.39 144.526  15
   2   6   2 1296.15 140.406   6
   2  -6   2 1477.15 140.476   8
   2  -6   2 1344.08 140.232   1
   2  -6   3 258.702 38.0538   5
  -2  -6  -3 350.763 46.7817   4
   2   6   3 371.648 43.4195   5
   2   6   3 242.236 40.7207   6
   2  -6   3 372.389 41.3587   1
   2   6   3 332.653 42.9578  11
  -2  -6  -3 425.586 37.4661   3
  -2  -6  -3 260.199 37.7862  12
  -2  -6  -4 326.530 44.0460  12
   2  -6   4 354.520 45.8146   1
   2   6   4 393.871 47.8000  11
   2  -6   4 342.649 44.6016   3
  -2  -6  -4 459.258 43.4747   3
  -2   6  -4 457.282 45.1386   3
   2   6   4 407.848 47.9613   3
  -2  -6  -4 450.840 52.4695   4
   2   6   4 309.931 46.5674   5
   2  -6   4 277.956 43.8326   5
   2   6   5-2.77203 12.6643  11
  -2  -6  -5 11.6120 11.9159  12
   2   6   5 7.42238 3.71796   2
   2   6   5-2.72852 12.9954   3
   2  -6   5 14.0629 13.7611   3
  -2   6  -6 1022.57 103.537  15
   2   6   6 816.548 100.118   3
   2  -6   6 999.358 100.937   3
  -2   6  -6 993.061 104.514   9
   2   6   6 919.617 101.150  11
  -2  -6  -6 812.705 98.6114  12
  -2   6  -7 590.675 66.0641  15
   2   6   7 469.169 62.8527   3
   2  -6   7 694.209 66.5847   3
  -2   6  -7 542.425 66.1305   9
   2   6   7 397.727 60.7098  11
  -2  -6  -7 415.520 60.5399  12
  -2   6  -8 798.737 81.0613  15
   2   6   8 732.393 79.5365   3
   2  -6   8 737.718 78.9519   3
  -2   6  -8 585.434 78.4736   9
  -2  -6  -8 588.340 76.3079  12
   2   6   8 485.429 72.9236  11
  -2   6  -9 702.908 72.2740  15
  -2  -6  -9 380.139 66.0792   9
   2   6   9 294.905 59.2731  11
  -2   6  -9 476.971 67.9472   9
  -2   6  -9 669.875 71.4208  13
  -2  -6  -9 775.255 68.7320  13
  -2  -6  -9 442.998 64.6558  12
   2   6   9 468.512 66.3396   3
   2  -6   9 521.678 67.1134   3
  -2   6 -10 732.843 91.9304   9
   2   6  10 727.117 90.3795   3
   2  -6  10 732.565 90.6934   3
  -2   6 -10 1106.72 97.3071  15
   2   6  10 330.163 78.5178  11
  -2   6 -10 1210.49 99.8704  13
  -2  -6 -10 1000.06 90.8443  13
  -2   7  12 34.2982 23.5284   3
  -2   7  11 713.529 85.9254   3
  -2  -7  11 812.842 89.7066   3
   2  -7 -11 717.648 90.5555  12
  -2   7  10 8.43269 15.8217   3
  -2  -7  10-2.98384 16.7951   3
   2   7 -10 4.11766 26.2803  15
   2  -7 -10-7.93545 20.3289  12
  -2  -7   9 46.8695 23.2347   1
  -2  -7   9 99.6559 34.1534   4
  -2   7   9 49.8338 18.9061   3
  -2  -7   9 75.8759 21.8286   3
   2   7  -9 97.7187 28.7277  15
   2  -7  -9 85.7001 25.6619  12
  -2  -7   8 3.27645 17.3842   1
  -2  -7   8 30.9346 25.9751   4
  -2  -7   8 9.07428 13.8554   3
  -2   7   8 8.76881 12.0219   3
   2   7  -8 3.20657 19.3201  15
   2  -7  -8 20.6708 17.6788  12
  -2   7   7 269.655 27.5138  11
   2  -7  -7 180.634 34.6267  12
  -2  -7   7 248.325 32.2087   3
  -2  -7   7 303.085 51.4734   4
  -2   7   7 179.211 30.6702   3
   2   7  -7 272.811 38.3938  15
  -2  -7   7 224.658 38.4341   1
   2  -7  -6 180.455 30.6421  12
  -2  -7   6 144.123 22.7439   3
  -2   7   6 119.555 22.2246   3
  -2  -7   6 183.025 39.5304   4
  -2  -7   6 181.736 31.4164   1
   2   7  -6 246.479 30.8526  15
   2   7  -5 5105.65 431.574  15
  -2   7   5 3986.01 438.166   8
  -2  -7   5 4227.12 425.194   3
  -2   7   5 4155.35 425.184   3
  -2   7   5 4453.52 431.536  14
   2  -7  -5 3640.87 431.224  12
  -2  -7   5 4488.84 425.130  12
  -2  -7   5 4624.49 445.516   4
  -2  -7   5 5303.03 425.172  10
  -2  -7   5 4800.97 428.317   9
  -2  -7   5 5248.47 439.185   1
  -2   7   5 3968.48 423.123   6
   2  -7  -4 598.296 78.1986  12
  -2  -7   4 768.396 91.2066   4
  -2   7   4 806.982 72.5988  10
  -2  -7   4 674.336 70.9183  10
  -2  -7   4 779.275 77.5378   9
  -2   7   4 660.416 71.3296   3
  -2  -7   4 661.460 71.2962   3
  -2   7   4 723.474 84.3755   8
  -2   7   4 794.212 78.2082  14
   2   7  -4 785.158 77.0620  15
   2  -7  -3 1616.40 183.568  12
  -2   7   3 2015.81 182.897  14
  -2  -7   3 2103.91 197.296   4
  -2  -7   3 2216.78 184.630   9
  -2   7   3 1865.87 188.546   8
  -2  -7   3 2048.35 182.074   6
   2   7  -3 1993.24 180.139  15
  -2  -7   3 1724.95 174.540   3
  -2   7   3 1676.59 174.437   3
  -2  -7   2 54.3435 11.6075  14
  -2   7   2 73.7948 18.7944  14
  -2  -7   2 65.5606 14.6606   6
   2   7  -2 22.0059 18.5678   7
  -2  -7   2 81.2844 12.2500  12
   2  -7  -2 61.1283 15.0304  11
  -2  -7   2 54.8765 7.00223   3
  -2   7   2 56.5912 18.8490   8
  -2  -7   2 54.4317 23.0654   4
  -2   7   2 47.3005 8.79453   5
   2   7  -2 78.5942 13.4123  15
  -2  -7   1 723.323 82.1244  12
   2  -7  -1 976.653 86.6823  11
   2   7  -1 846.191 92.0062  11
  -2  -7   1 902.365 83.8379   2
   2  -7  -1 910.827 88.3947   1
  -2   7   1 837.398 101.446   7
  -2  -7   1 836.593 88.4274   6
  -2   7   1 1079.77 91.3113  14
  -2  -7   1 695.728 81.6859  14
   2   7  -1 554.797 93.1052   7
   2   7  -1 798.410 96.1153   8
   2   7   0 22.1067 17.4670   7
  -2   7   0-4.37737 15.0481   7
   2  -7   0 65.7990 14.2904  11
   2   7   0 11.7086 15.2852  11
  -2  -7   0 6.13584 7.07355  12
  -2  -7   0 4.22364 16.5975   4
  -2  -7   0 15.3177 7.27171   2
   2  -7   0 10.6550 11.1481   1
   2   7   0 9.29268 16.5695   8
   2  -7   0-8.76660 16.0013   8
   2   7   0 5.27503 6.40749  15
  -2   7   0 20.1692 13.5205  14
   2   7   1 516.506 87.0501   7
  -2  -7  -1 608.558 69.8474  12
   2   7   1 737.083 78.4576  11
   2   7   1 810.624 67.2801  10
   2  -7   1 662.376 65.8381  10
  -2   7  -1 591.947 65.5923   3
  -2  -7  -1 678.284 65.4445   3
   2  -7   1 674.598 74.3061   1
   2   7   1 628.132 86.4272   8
  -2   7  -1 659.040 80.1551   7
  -2  -7  -1 851.946 86.8640   4
   2   7   1 687.602 65.9712  15
   2   7   2 99.0744 16.9990   6
  -2  -7  -2 84.2854 15.4287  12
   2   7   2 108.828 22.3794  11
  -2  -7  -2 88.0387 24.1154   4
  -2  -7  -2 102.614 11.8352   3
   2  -7   2 104.533 19.8945   1
   2   7   2 83.6087 27.3548   8
  -2   7  -2 121.199 22.1264  15
   2   7   2 59.9051 7.66896  15
  -2   7  -2 68.1444 11.7596   3
  -2  -7  -3 1132.12 80.6499  12
   2   7   3 1418.09 89.4217  11
  -2  -7  -3 1638.10 102.572   4
  -2  -7  -3 1434.63 75.8257   3
   2  -7   3 1489.86 88.1792   1
   2   7   3 1210.92 107.507   8
  -2   7  -3 1556.85 91.8372  15
   2   7   3 1240.62 83.5928   5
   2   7   4 282.750 39.9713   5
  -2   7  -4 293.801 35.2132   3
  -2  -7  -4 294.604 45.4048   4
  -2   7  -4 357.541 44.3720  15
   2  -7   4 315.031 40.6053   1
  -2  -7  -4 261.199 37.4659  12
   2   7   4 268.890 39.1347  11
   2  -7   5 2383.89 265.219   3
   2   7   5 2658.53 268.063   3
   2   7   5 2889.71 269.402  11
  -2  -7  -5 2356.97 265.889  12
   2  -7   5 2938.66 269.912   1
  -2  -7  -5 3483.56 276.306   4
   2   7   6 259.466 40.7841   3
  -2  -7  -6 257.288 37.9381  12
   2   7   6 257.140 38.7260  11
   2  -7   6 284.433 39.1858   3
  -2  -7  -7 254.676 38.7069  12
   2   7   7 233.125 36.7745  11
  -2  -7  -7 329.903 37.6158  13
   2  -7   7 165.957 35.7178   3
   2   7   7 177.727 37.5096   3
  -2   7  -7 293.914 43.5569  15
  -2  -7  -8 29.0764 21.5458  12
  -2   7  -8 48.7321 28.2572  15
   2   7   8 15.0835 17.5040  11
  -2   7  -8 63.7991 24.7260  13
  -2  -7  -8 43.4985 20.8021  13
   2  -7   8 20.2773 20.3232   3
   2   7   8 36.6033 22.7859   3
  -2  -7  -9-11.9124 22.3505  12
   2   7   9 12.3283 17.8370  11
  -2  -7  -9-13.5287 21.8437  13
  -2   7  -9-3.40661 23.8173  13
   2  -7   9-7.54998 22.9976   3
   2   7   9-7.95142 22.0561   3
  -2   7  -9 40.7396 29.0058  15
  -2  -7  -9 21.2003 24.7037   9
  -2   7 -10-34.2358 30.5985  13
   2  -7  10-21.0196 27.2427   3
   2   7  10-25.7861 27.2382   3
   2  -8 -10 642.646 88.1908  12
  -2   8  10 694.231 82.9622   3
  -2  -8   9 44.2716 29.9177   4
   2  -8  -9 23.3652 21.4704  12
  -2  -8   9 59.5108 27.0979   1
  -2   8   9 14.0758 16.1882   3
   2   8  -9 46.4082 29.1096  15
  -2   8   8 670.711 82.5412   3
  -2  -8   8 750.483 83.8956   3
   2  -8  -8 714.072 89.9569  12
  -2  -8   8 923.384 94.3646   1
   2   8  -8 961.522 93.9777  15
  -2  -8   8 896.448 105.431   4
   2  -8  -7 6.70727 15.7635  12
  -2   8   7 19.3492 16.7184  14
  -2  -8   7 40.1959 29.4913   4
  -2  -8   7 33.2585 22.3295   1
   2   8  -7 30.0586 20.3245  15
  -2  -8   7 22.1837 12.9451   3
  -2   8   7 22.2517 12.8813   3
  -2   8   6 1010.38 90.6693  14
  -2  -8   6 763.980 104.408   4
  -2   8   6 692.428 83.7275   3
  -2  -8   6 774.942 84.3149   3
  -2  -8   6 1065.12 99.8038   1
  -2   8   6 746.024 98.1744   8
   2   8  -6 1083.41 94.5305  15
   2  -8  -6 758.434 92.3544  12
   2  -8  -5 129.021 26.4554  12
  -2   8   5 108.438 17.0908   3
  -2  -8   5 105.953 17.0179   3
  -2  -8   5 119.455 37.2679   4
  -2  -8   5 147.629 30.1274   1
  -2   8   5 104.668 30.6368   8
  -2   8   5 167.556 24.0761  14
   2   8  -5 134.414 25.1999  15
  -2  -8   4 4.85006 6.20342   3
  -2   8   4 6.37554 6.30566   3
  -2  -8   4-5.55460 24.2228   4
  -2   8   4 8.10750 17.2552   8
   2   8  -4 3.99308 12.6098  15
  -2   8   4 4.09115 12.4715  14
   2  -8  -4 5.66504 13.2115  12
   2  -8  -3 51.8820 17.5927  12
  -2  -8   3 48.1879 27.7817   4
  -2   8   3 42.2603 7.93124   5
  -2   8   3 60.3034 17.2159  14
   2   8  -3 72.8069 15.9821  15
  -2   8   3 72.2144 22.9507   8
  -2  -8   3 73.4772 16.1435   6
  -2  -8   3 41.4772 6.25717   3
   2  -8  -2 525.672 52.2691  11
   2   8  -2 433.078 47.7635  15
  -2  -8   2 392.188 46.3177  12
  -2   8   2 492.425 52.8399  14
  -2  -8   2 365.010 49.8765   6
  -2   8   2 407.888 54.4786   8
  -2  -8   1 5.00243 21.2947   4
   2  -8  -1 21.6573 15.0272   1
  -2  -8   1 8.83659 8.17190   2
  -2   8   1 13.6036 14.3236  14
  -2  -8   1 13.7836 9.38793  14
  -2   8   1 11.3601 18.7318   7
   2   8  -1-5.64739 18.6242   7
  -2  -8   1-2.54602 13.7183   6
  -2  -8   1 1.25760 7.59540  12
   2   8   0 4093.43 396.318  11
  -2  -8   0 4518.32 405.896   4
   2  -8   0 4619.79 394.032   1
  -2  -8   0 3669.50 386.130  12
   2   8   0 4097.36 404.803   8
   2   8   0 3398.31 405.592   7
  -2   8   0 3651.82 402.056   7
   2   8   0 4057.82 384.191  15
  -2  -8   0 4104.52 385.153   2
   2   8   1 24.8360 16.6892  11
  -2  -8  -1 34.5630 11.7329  12
  -2  -8  -1 51.8802 23.0565   4
   2  -8   1 29.8572 15.2390   1
   2   8   1 33.1680 23.1009   8
  -2   8  -1 41.9241 18.3703  15
   2   8   1 25.6678 7.20711  15
   2  -8   1 32.6352 7.23105   6
   2   8   1 34.0556 29.1196   7
  -2   8  -1 12.8435 17.0330   7
   2   8   2 793.259 77.6452  15
  -2   8  -2 1197.50 95.1417  15
   2   8   2 1069.71 110.842   8
   2  -8   2 1098.89 92.7307   1
  -2  -8  -2 965.081 78.8539  13
  -2   8  -2 892.039 79.4041  13
  -2  -8  -2 888.069 86.1715  12
   2   8   2 969.394 93.4480  11
   2  -8   2 656.557 78.7384  10
  -2   8  -2 617.207 78.6360   3
  -2  -8  -2 1170.58 105.488   4
   2   8   2 755.775 107.380   7
  -2  -8  -3-6.22463 12.1714  12
   2   8   3 5.78946 14.8333  11
  -2   8  -3-0.93551 8.06340   3
  -2  -8  -3 4.37748 18.6272   4
   2   8   3 12.3612 22.0036   8
   2  -8   3 5.35071 14.1742   1
  -2   8  -3 5.83642 17.3406  15
  -2  -8  -3 7.45612 7.20352  13
  -2   8  -3 4.59238 7.96483  13
  -2  -8  -4 274.613 45.6086  12
   2   8   4 423.288 50.8830  11
  -2  -8  -4 427.669 57.8368   4
  -2   8  -4 484.536 55.0400  15
   2   8   4 264.729 58.4420   8
  -2   8  -4 397.301 43.5450  13
  -2  -8  -4 423.155 42.6558  13
   2  -8   4 400.908 51.1215   1
   2   8   5 52.1142 17.7935  11
  -2  -8  -5 22.6445 11.5516  13
  -2   8  -5 22.7311 13.3247  13
  -2  -8  -5 11.3167 20.6982   4
   2   8   5 13.4465 27.2001   8
  -2   8  -5 19.8450 19.9862  15
   2  -8   5 2.96358 16.5425   1
  -2  -8  -5 7.86996 14.0164  12
  -2   8  -6 568.143 63.3869  15
  -2  -8  -6 379.142 54.1416  12
  -2   8  -6 434.532 52.4295  13
  -2  -8  -6 505.686 50.9923  13
   2   8   6 347.938 52.6023  11
   2   8   7 6.33259 19.9948   3
   2  -8   7 8.44915 17.3797   3
  -2   8  -7 7.01533 17.1037  13
   2   8   7 8.32981 14.9602  11
  -2  -8  -7 6.60950 16.6523  12
   2   8   8 597.665 73.6449   3
  -2  -8  -8 572.781 73.8116  12
   2   8   8 472.199 68.3127  11
  -2   8  -9 21.6026 25.3517  13
  -2  -8  -9 24.3023 23.5418  12
   2   9  -9 4.08052 26.3414  15
  -2  -9   9 16.2280 25.3221   1
   2  -9  -9 4.01721 19.8739  12
  -2  -9   8-6.16086 29.3100   4
   2   9  -8 7.30335 25.2956  15
  -2   9   8-10.8806 25.3596   8
  -2  -9   8 20.1098 24.2040   1
   2  -9  -8 3.76739 17.5634  12
  -2  -9   7 220.088 41.6392   1
  -2  -9   7 273.764 55.2601   4
   2   9  -7 175.852 35.2952  15
  -2   9   7 154.245 39.5562   8
   2  -9  -7 157.711 32.9781  12
  -2   9   7 205.788 29.1192  14
  -2  -9   6 20.4091 23.0237   1
  -2  -9   6 30.9524 28.2857   4
  -2   9   6-4.83356 22.5786   8
  -2   9   6 24.0376 14.1527  14
   2  -9  -6 6.57924 17.7677  12
   2   9  -6 31.4309 20.2165  15
   2   9  -5 1722.77 146.702  15
  -2   9   5 1157.99 150.281   8
  -2   9   5 1444.11 141.956  14
  -2  -9   5 1654.01 165.337   4
   2  -9  -5 1114.33 144.419  12
  -2  -9   4 568.048 76.0502   4
   2   9  -4 592.302 58.8502  15
  -2   9   4 464.264 65.1050   8
  -2   9   4 525.042 57.4193  14
  -2  -9   4 421.738 55.2429   6
   2  -9  -4 399.871 58.7908  12
  -2  -9   3 700.417 96.9487   4
   2   9  -3 883.950 82.2296  15
  -2   9   3 835.389 91.8041   8
  -2   9   3 875.674 83.8045  14
  -2  -9   3 716.346 81.9097   6
   2  -9  -3 683.449 84.7057  12
  -2  -9   3 670.586 77.8459  12
   2  -9  -2 201.285 36.8404  12
  -2   9   2 326.717 39.0703  14
   2   9  -2 296.621 34.4333  15
  -2  -9   2 331.180 35.3081   2
  -2  -9   2 244.424 31.9137  12
  -2  -9   2 218.652 35.6809   6
  -2   9   2 306.798 55.9166   7
  -2  -9   1 433.097 46.8390  12
  -2  -9   1 432.056 46.1774   2
  -2  -9   1 560.181 70.1562   4
  -2   9   1 408.017 67.1321   7
   2   9  -1 418.720 67.2482   7
   2   9  -1 497.118 47.1393  15
   2  -9  -1 505.296 54.9973   1
  -2  -9   0 6.55595 7.77381   2
   2  -9   0 16.5631 17.8713   1
  -2  -9   0 26.9626 22.4099   4
   2   9   0 6.85829 23.5707   7
  -2   9   0 27.7534 22.4518   7
   2   9   0 26.6931 24.9249   8
  -2  -9   0 26.2058 10.9717  12
   2   9   1 252.820 39.0722  11
   2  -9   1 341.492 40.4774   1
  -2  -9  -1 301.060 50.4898   4
   2   9   1 223.999 53.2989   7
  -2   9  -1 243.395 43.3161   7
   2   9   1 250.879 49.0751   8
  -2  -9  -1 201.609 30.7282  12
   2   9   1 228.679 26.6035  15
  -2   9  -1 287.446 38.7922  15
   2   9   2 217.986 33.0128  11
   2  -9   2 213.302 32.9498   1
  -2  -9  -2 193.934 40.1089   4
   2   9   2 215.267 45.7431   8
  -2  -9  -2 211.631 27.3375  12
   2   9   2 179.820 48.4346   7
  -2   9  -2 232.669 34.7178  15
   2   9   2 145.925 17.3165  15
  -2  -9  -3 329.834 47.5072  12
  -2  -9  -3 549.596 65.8423   4
  -2   9  -3 389.753 41.2101  13
   2   9   3 336.963 62.8446   8
   2   9   3 448.723 55.0604  11
  -2   9  -3 591.851 58.6054  15
   2  -9   3 379.733 51.9568   1
  -2  -9  -4 403.402 54.9499   4
  -2   9  -4 413.960 49.6021  15
   2   9   4 220.303 52.9123   8
   2   9   4 261.269 42.1731  11
  -2  -9  -4 218.795 38.0793  12
   2  -9   4 393.543 46.8051   1
  -2  -9  -5 1151.28 143.590  12
  -2  -9  -5 1767.43 157.937   4
  -2   9  -5 1418.00 139.344  13
   2   9   5 1139.67 161.135   8
   2  -9   5 1429.40 149.355   1
  -2   9  -5 1808.91 154.909  15
   2   9   5 1333.07 146.102  11
  -2   9  -6 101.907 31.4018  15
   2   9   6 49.7842 33.1330   8
  -2  -9  -6 69.5074 22.3475  12
   2   9   6 66.0226 22.1868  11
  -2   9  -7 161.730 39.0912  15
   2   9   7 102.434 40.4888   8
   2   9   7 129.081 26.7292  11
  -2  -9  -7 108.648 28.7368  12
  -2  -9  -8 7.57934 20.4088  12
  -2  10   9 251.999 51.1031   8
  -2 -10   8 158.459 51.3699   4
  -2 -10   8 87.0713 34.1343   1
  -2  10   8 124.111 39.0322   8
   2 -10  -8 127.522 32.7425  12
   2  10  -8 186.476 39.1081  15
  -2 -10   7 309.962 49.6738   1
  -2 -10   7 171.844 53.9772   4
  -2  10   7 171.820 43.1351   8
   2  10  -7 345.283 46.1726  15
   2 -10  -7 177.751 38.2423  12
  -2 -10   6 302.240 58.1678   4
  -2  10   6 231.178 31.2654  14
  -2  10   6 174.471 41.7213   8
   2  10  -6 270.428 40.4902  15
   2 -10  -6 156.575 34.9442  12
   2  10  -5 100.882 25.4420  15
  -2  10   5 149.252 34.9438   8
  -2 -10   5 130.199 42.7192   4
  -2  10   5 125.714 22.9276  14
  -2 -10   5 73.9474 21.6677   6
   2 -10  -5 98.3540 26.6756  12
   2 -10  -4 115.471 25.7238  12
  -2 -10   4 68.5455 30.3584   1
  -2 -10   4 57.7950 33.4098   4
  -2  10   4 88.7499 19.9615  14
  -2  10   4 105.750 30.7513   8
  -2 -10   4 83.7509 20.4660   6
   2  10  -4 92.3398 22.6897  15
   2 -10  -3 72.3350 22.5018  12
  -2 -10   3 67.4380 18.5323   2
  -2 -10   3 94.1001 37.7752   4
  -2  10   3 47.0029 23.7775   8
  -2  10   3 62.1283 20.0640  14
  -2  10   3 30.6456 29.7952   7
  -2 -10   3 64.4572 19.0433   6
   2  10  -3 79.7354 19.4766  15
   2  10  -2 126.999 22.4989  15
   2 -10  -2 161.490 31.1913   1
  -2 -10   2 149.504 22.8583   2
  -2  10   2 148.613 45.4305   7
  -2 -10   2 130.396 26.5389   6
   2 -10  -2 100.028 26.9076  12
  -2  10   1 341.128 61.5640   7
  -2 -10   1 351.433 61.8484   4
   2 -10  -1 410.080 49.7343   1
   2  10  -1 343.720 40.0984  15
  -2 -10   1 320.541 40.0415  12
   2  10   0 557.590 58.9470  15
  -2  10   0 726.696 70.0562  15
  -2  10   0 553.541 80.6473   7
   2  10   0 620.123 80.9273   8
  -2 -10   0 449.591 60.5762  12
  -2 -10   0 621.321 82.8414   4
   2  10   0 528.488 85.3593   7
   2 -10   0 683.005 70.9817   1
  -2  10  -1 596.203 63.9143  15
   2  10   1 567.755 76.3760   8
  -2 -10  -1 562.235 76.7785   4
  -2 -10  -1 430.934 55.2547  12
   2 -10   1 518.429 63.7007   1
   2  10   1 391.418 75.9256   7
   2  10   2 236.282 40.5799  11
  -2  10  -2 283.192 41.8437  15
   2  10   2 287.202 53.2614   8
  -2 -10  -2 210.607 46.6885   4
  -2 -10  -2 218.501 33.8650  12
   2 -10   2 285.334 40.9937   1
   2  10   2 234.186 56.5643   7
   2  10   3 414.442 58.3179  11
  -2  10  -3 520.394 61.8580  15
   2  10   3 505.370 75.1965   8
  -2 -10  -3 388.353 67.3746   4
  -2 -10  -3 408.654 53.9636  12
   2 -10   3 577.595 63.0831   1
   2  10   3 501.322 82.8194   7
  -2  10  -4 72.7150 27.4832  15
   2  10   4 55.0316 33.1515   8
  -2 -10  -4 72.7090 30.7037   4
  -2 -10  -4 56.2561 19.5780  12
   2  10   4 34.6969 20.6019  11
   2 -10   4 63.9633 24.3393   1
  -2  10  -5 25.9224 24.9618  15
   2  10   5 28.1009 35.4021   8
  -2 -10  -5 2.83156 17.9372  12
   2  10   5 27.7996 19.3333  11
   2 -10   5 21.0298 21.4088   1
   2  10   6 71.2674 38.2292   8
  -2  10  -6 124.208 36.0625  15
  -2 -10  -6 40.1937 21.8527  12
  -2 -10  -7 158.440 33.2413  12
  -2  11   8 26.9407 28.1937   8
  -2  11   7 5.19929 26.6659   8
   2 -11  -7 11.0974 20.8558  12
   2  11  -7 21.0870 26.1433  15
  -2 -11   7 14.0012 39.4224   4
  -2 -11   6 285.538 60.7743   4
  -2  11   6 251.446 49.4633   8
   2  11  -6 298.621 44.6681  15
   2 -11  -6 211.999 40.1868  12
  -2 -11   5 95.9547 42.4081   4
  -2  11   5 132.305 33.9504   8
   2 -11  -5 90.5461 27.7385  12
   2  11  -5 99.6372 26.8624  15
  -2 -11   5 113.699 37.6573   1
   2  11  -4 775.638 82.3204  15
  -2  11   4 783.962 90.9253   8
  -2  11   4 667.763 104.927   7
   2 -11  -4 576.688 82.4135  12
  -2 -11   4 914.988 98.1133   1
  -2 -11   4 706.326 101.743   4
   2 -11  -3-2.97076 20.1870   1
  -2 -11   3 9.64912 27.9225   1
   2 -11  -3 27.9453 20.8914  12
  -2 -11   3-13.3132 31.0278   4
   2  11  -3-6.23196 16.4198  15
  -2  11   3 23.5489 34.2253   7
   2 -11  -2 374.589 51.0022   1
   2 -11  -2 271.113 46.2840  12
   2  11  -2 369.182 43.4956  15
  -2  11   2 408.817 46.8843  15
  -2  11   2 262.935 61.8609   7
   2 -11  -1 78.6032 25.2917   1
   2 -11  -1 29.9451 19.3112  12
  -2  11   1 87.0455 23.5258  15
   2  11  -1 81.3244 17.3718  15
  -2 -11   1 75.5452 33.9450   4
  -2  11   1 55.9337 34.5054   7
  -2 -11   0 36.7885 29.7796   4
  -2  11   0 12.6120 28.8088   7
   2  11   0 30.6701 35.7667   7
   2 -11   0 15.9221 20.8196   1
  -2  11   0 2.58951 18.6552  15
  -2 -11  -1 225.044 45.7760   4
   2  11   1 147.032 48.0376   7
   2  11   1 163.231 41.7477   8
   2 -11   1 147.515 34.3246   1
  -2  11  -1 174.517 34.6761  15
  -2 -11  -2 453.632 73.8604   4
   2  11   2 431.166 81.9609   7
   2  11   2 347.434 71.0500   8
   2 -11   2 511.886 63.1641   1
  -2  11  -2 574.638 64.8402  15
  -2 -11  -3 5.43878 30.1996   4
   2  11   3 13.1596 27.3171   8
   2 -11   3 6.91781 23.0714   1
   2  11   3 60.2602 39.3005   7
  -2  11  -3 9.94089 23.8361  15
  -2 -11  -4 326.791 47.3761  12
   2  11   4 339.006 49.7953  11
   2  11   4 344.027 65.6373   8
   2 -11   4 369.940 54.1788   1
  -2  11  -4 443.484 56.0574  15
   2  11   4 331.008 71.0577   7
   2  11   5 18.1135 42.6897   7
   2  11   5 134.396 43.0356   8
  -2  11  -5 91.7073 32.1202  15
  -2 -11  -5 48.7746 22.9080  12
   2 -11   5 70.6476 29.6470   1
  -2 -11  -6 115.803 28.7965  12
  -2  12   6 18.8545 27.2791   8
   2  12  -6-12.8084 25.4893  15
  -2  12   5 149.411 39.1316   8
   2  12  -5 170.095 33.5514  15
   2 -12  -5 97.7867 29.2918  12
   2 -12  -4-13.1275 20.2377  12
  -2 -12   4-9.96923 30.7359   1
   2  12  -4 12.2940 18.7169  15
  -2  12   4-16.5852 35.2852   7
  -2 -12   4 7.04482 32.8370   4
   2 -12  -3 158.750 33.0755   1
  -2 -12   3 167.537 42.0500   1
  -2  12   3 55.1484 43.6986   7
   2 -12  -3 81.7575 26.6714  12
   2 -12  -2 6.11644 18.1972  12
   2 -12  -2-9.59754 23.4001   1
  -2  12   2 23.6689 18.8995  15
  -2  12   2 22.9906 30.9497   7
  -2 -12   2 27.0479 32.8191   4
   2 -12  -1 191.219 38.8040  12
   2 -12  -1 297.084 44.7171   1
  -2  12   1 332.696 41.5372  15
  -2  12   1 293.782 58.6152   7
  -2 -12   1 190.961 54.0042   4
   2 -12   0 2.97779 18.1415  12
  -2 -12   0 19.1168 30.9143   4
  -2  12   0-5.25750 21.6602  15
  -2  12   0-6.64435 29.6512   7
   2 -12   0 3.34708 22.7422   1
  -2 -12  -1 431.904 68.7098   4
   2 -12   1 318.757 52.2240   1
  -2  12  -1 414.209 52.6361  15
   2  12   1 309.108 68.8765   7
  -2 -12  -2-23.7978 32.5217   4
   2  12   2-12.6763 31.9142   8
  -2  12  -2 71.2573 26.8603  15
   2  12   2 60.3124 40.9915   7
   2 -12   2-7.07081 23.0671   1
   2 -12   3 214.625 40.4592   1
  -2  12  -3 210.420 41.9531  15
   2  12   3 241.425 53.4332   8
  -2  12  -4 3.59283 26.9178  15
   2 -13  -3 136.121 31.6254  12
   2 -13  -1 3.32212 24.0735   1
   2 -13   0 24.0944 24.3195   1
  -2  13   0 5.13180 21.4588  15
   2 -13   1-28.5663 25.6765   1
  -2  13  -1 2.79749 22.7714  15
  -2  13  -2 42.6273 26.0616  15
   3   0 -14 427.796 61.7479   9
   3   0 -13-9.98250 31.8659  13
   3   0 -13-10.5313 20.0555   9
  -3   0  13-4.68338 21.3846   3
   3   0 -12 138.841 28.8818   9
  -3   0  12 79.5151 27.2507   3
   3   0 -11-5.59599 15.7504  12
   3   0 -11-15.9086 22.7046  13
  -3   0  11 3.63418 15.4644   3
   3   0 -11 2.80054 13.8467   9
   3   0 -10 1971.22 189.433   9
   3   0 -10 2369.64 198.931  13
   3   0 -10 1906.53 189.717  12
  -3   0   9 14.9836 13.9678   3
   3   0  -9-2.10142 11.1320   9
  -3   0   9-1.10226 8.05561   4
   3   0  -9 4.19326 10.9260  12
   3   0  -9-6.08344 15.3135  13
   3   0  -8 6695.35 688.960  12
  -3   0   8 8144.24 687.862   4
   3   0  -8 8174.37 695.640  13
  -3   0   8 5765.70 691.219   3
  -3   0   7 2.23350 8.76169   3
   3   0  -7 2.22614 11.0055  13
   3   0  -7-1.50156 6.85153  12
  -3   0   6 1634.13 159.209  11
  -3   0   6 1950.68 159.472  12
   3   0  -6 1522.16 157.699  12
  -3   0   6 1318.72 159.743   3
  -3   0   5-0.58220 3.21093   1
  -3   0   5 18.9184 7.85919   3
  -3   0   5 10.2622 6.58638  13
   3   0  -5-3.19123 5.07856  12
  -3   0   5 6.94998 6.05151  12
  -3   0   4 977.170 77.1465  11
  -3   0   4 719.788 73.3264   1
  -3   0   4 657.254 75.8173  13
   3   0  -4 708.252 75.9851  10
   3   0  -4 760.681 75.4891  12
   3   0  -3-1.97966 3.52449  10
  -3   0   3 4.66064 4.52267  11
   3   0  -3 4.98999 4.55435  11
   3   0  -2 5368.76 483.001   9
   3   0  -2 4954.01 484.177   2
   3   0  -2 4493.94 484.018  10
  -3   0   2 5302.92 483.397   8
   3   0  -2 5115.96 485.130  11
   3   0  -1 1.27391 4.85222   2
   3   0  -1 4.20276 4.99112   6
   3   0  -1 1.01557 3.87010   8
   3   0  -1 1.31551 3.37596   9
  -3   0   1 3.47885 3.79716   9
  -3   0   0 13788.1 1095.20  14
   3   0   0 9975.48 1097.38   6
  -3   0   0 10748.1 1092.58   9
   3   0   0 11550.8 1091.70   9
   3   0   1 6.84393 8.55752   5
  -3   0  -1 5.83368 4.97453   9
   3   0   1 32.6416 9.09871  14
  -3   0  -1 39.3474 7.25175  14
   3   0   2 9001.64 1051.37   5
  -3   0  -2 11511.8 1048.33   9
   3   0   2 11578.5 1047.01  14
   3   0   2 11384.1 1053.00   3
  -3   0  -3-0.94303 5.23715  15
  -3   0  -3 6.86709 7.12376   9
   3   0   3 10.6333 9.46643   5
   3   0   3 2.55532 9.41901   3
   3   0   3 1.23126 6.42078  14
   3   0   4 453.709 61.9679   3
  -3   0  -4 501.149 59.1688   9
  -3   0  -4 599.836 55.5778  15
   3   0   4 498.129 55.8033  14
   3   0   5 17.1443 9.62564  14
   3   0   5 3.14376 11.9754   3
  -3   0  -5 1.19139 7.09782  15
  -3   0  -6 973.144 104.504   4
  -3   0  -6 1143.05 104.505  15
   3   0   6 892.018 111.880   3
  -3   0  -7 3.31319 8.20775   4
  -3   0  -7-4.71107 10.3521  15
   3   0   7 11.8241 17.1848   3
   3   0   8 2340.10 294.203   3
  -3   0  -8 3176.86 286.183  15
  -3   0  -8 3043.15 295.020   9
  -3   0  -9-4.14754 17.2024   9
  -3   0  -9-8.38882 15.0666  15
   3   0   9 9.66284 21.0664   3
   3   0  10 2347.68 272.214   3
  -3   0 -10 2588.25 271.796   9
  -3   0 -10 2815.90 261.690  15
   3  -1 -14 53.9255 27.2484   9
   3  -1 -13 2274.79 224.138   9
   3   1 -13 2377.64 222.485   9
   3  -1 -13 2948.86 236.558  13
   3  -1 -12 332.506 51.4143  12
  -3  -1  12 350.253 55.7784   3
   3  -1 -12 509.645 64.7529  13
   3  -1 -12 346.588 51.7873   9
   3   1 -12 400.127 51.3022   9
   3  -1 -11 1149.52 117.943   9
   3   1 -11 1280.45 116.735   9
   3  -1 -11 1041.69 116.324  12
   3  -1 -11 1371.50 126.136  13
   3  -1 -10 100.635 22.4452  12
   3   1 -10 98.3454 20.7225  12
  -3  -1  10 100.551 25.1517   3
   3  -1 -10 80.6984 22.1210   9
   3   1 -10 128.989 22.2085   9
  -3  -1   9 595.254 69.2877   4
   3   1  -9 729.260 70.9289   9
   3  -1  -9 801.257 78.7160  13
  -3  -1   9 524.037 73.1008   3
   3  -1  -9 591.680 71.1402  12
   3   1  -9 684.474 71.1405  12
   3  -1  -8 8.57504 10.7083   1
  -3  -1   8-1.84889 9.47472   4
   3   1  -8-3.02489 7.75132   9
  -3  -1   8-5.24541 10.8783   3
   3  -1  -8 8.02208 8.74596  12
   3   1  -8 4.90728 8.94217  12
   3  -1  -8 12.9609 13.9525  13
  -3  -1   7 1408.54 171.173   3
   3  -1  -7 1907.09 174.210  13
   3   1  -7 1768.17 168.571  12
   3  -1  -7 1742.84 170.718  12
  -3  -1   7 1907.71 169.393  12
   3   1  -7 1822.15 168.202   9
   3  -1  -7 1514.02 166.947   1
   3   1  -6 674.574 63.7256   9
   3   1  -6 618.483 63.8065  12
  -3  -1   6 741.867 65.4035  12
   3  -1  -6 619.427 66.1036  12
  -3   1   6 747.886 67.5549  12
  -3  -1   6 566.808 63.0419   1
   3  -1  -6 528.373 62.9977   1
  -3  -1   6 539.451 67.1143   3
  -3   1   5 6950.65 652.939  11
  -3  -1   5 8581.55 657.756  11
  -3   1   5 6705.35 654.121   2
  -3  -1   5 5513.09 653.725  13
  -3  -1   5 6575.91 656.636   3
  -3  -1   5 6480.04 652.757   1
   3   1  -5 7144.05 652.699  12
  -3  -1   5 7671.16 653.800  12
   3  -1  -5 6922.17 655.279  12
  -3  -1   5 6709.57 653.455  15
  -3  -1   4 1632.67 189.224  13
   3  -1  -4 2134.00 191.064  12
   3   1  -4 1976.31 187.459  12
  -3  -1   4 2348.12 192.095  11
  -3   1   4 2090.56 187.665  11
  -3  -1   4 1772.55 188.956   1
  -3  -1   4 1783.77 188.514  15
  -3  -1   4 2273.92 190.401  10
   3  -1  -4 1823.25 189.427  10
  -3   1   4 1874.44 189.190   2
   3  -1  -3 12203.0 1122.88  10
  -3  -1   3 14012.6 1123.64  10
   3  -1  -3 9086.19 1120.21  11
   3   1  -3 10104.8 1124.03  11
  -3  -1   3 15228.5 1125.70  11
   3   1  -3 13067.5 1120.75  12
  -3   1   3 12798.5 1123.44   2
   3  -1  -3 11689.1 1123.10   2
   3   1  -2 991.711 100.297  11
  -3  -1   2 1332.77 102.645  11
  -3  -1   2 1097.24 99.4911  10
   3  -1  -2 911.634 98.3093  10
   3   1  -2 1003.05 94.9759   9
   3  -1  -2 821.666 98.0912   2
   3   1  -2 876.195 97.9406   2
  -3  -1   2 1183.29 100.745   8
  -3   1   2 936.678 98.7060   6
   3  -1  -1 1189.28 145.926  10
   3   1  -1 1563.96 143.096   9
  -3  -1   1 1494.84 143.785   9
   3  -1  -1 1891.99 147.422   9
   3   1  -1 1699.75 150.235  11
   3   1  -1 1347.31 147.621   6
   3  -1  -1 1151.49 145.891   6
  -3   1   1 1600.87 150.077   6
  -3  -1   1 1687.56 145.553   7
   3   1  -1 1171.26 147.176   8
  -3  -1   1 1677.02 148.510   2
  -3   1   0 174.758 19.9069   9
   3   1   0 181.912 17.3878   9
  -3  -1   0 155.668 17.4321   9
   3   1   0 134.063 19.6479   2
  -3   1   0 192.889 21.2545  14
   3   1   0 222.173 25.7949   6
   3   1   0 165.980 18.6682   7
  -3  -1   0 136.030 21.2824   5
   3   1   1 1112.42 100.548  12
  -3  -1  -1 1057.32 107.370   5
  -3   1  -1 1084.21 104.115   9
  -3  -1  -1 1129.87 102.505   9
  -3  -1  -1 1025.19 104.724   3
   3  -1   1 757.001 104.752   5
  -3   1  -1 1050.35 103.123  14
  -3  -1  -1 934.711 99.6241  14
   3  -1   1 1063.38 104.276  14
  -3  -1  -2 165.966 18.7017  15
   3  -1   2 146.145 24.2456   3
  -3   1  -2 202.220 23.8092   9
  -3  -1  -2 182.558 22.3594   9
   3  -1   2 188.354 26.9981   5
   3   1   2 178.807 20.3414  12
   3  -1   2 121.350 20.9803  14
   3   1   2 157.716 20.0435  14
  -3  -1  -3 4796.84 428.806  15
  -3   1  -3 4940.30 431.911  15
   3  -1   3 3939.55 436.489   3
  -3  -1  -3 5967.89 437.376   3
  -3  -1  -3 4537.44 433.835   9
  -3   1  -3 4229.28 433.852   9
   3  -1   3 3966.94 436.965   5
   3   1   3 4709.49 430.828  12
   3  -1   3 4051.47 431.665  14
   3   1   3 3959.81 429.805  14
   3  -1   4 1479.71 157.134   3
  -3  -1  -4 1511.47 154.131   9
  -3   1  -4 1749.83 151.515  15
  -3  -1  -4 1513.35 148.079  15
   3  -1   4 1510.96 151.379  14
   3   1   4 1411.05 149.246  14
  -3   1  -5 5685.87 528.481   4
   3  -1   5 5115.87 531.825   3
  -3  -1  -5 5182.49 529.259   9
  -3   1  -5 6030.80 525.466  15
  -3  -1  -5 5730.30 522.653  15
   3   1   5 4954.44 523.345  14
  -3  -1  -6 432.466 59.8743   9
  -3  -1  -6 477.821 53.3493   4
  -3   1  -6 517.842 59.0312   4
  -3   1  -6 526.753 56.2177  15
  -3  -1  -6 544.936 53.9365  15
   3  -1   6 505.371 64.2774   3
  -3   1  -7 1465.21 151.184   9
  -3   1  -7 1220.81 143.179   4
  -3  -1  -7 1652.06 143.260  15
  -3   1  -7 1586.36 145.232  15
   3  -1   7 1132.39 150.617   3
  -3  -1  -8 51.4709 16.3759  15
  -3   1  -8 66.0790 23.9344   9
   3  -1   8 30.5309 21.1983   3
  -3  -1  -9 36.8203 15.8221  15
  -3   1  -9 28.9193 19.8548   9
  -3  -1  -9 54.7270 23.5244   9
   3  -1   9 43.2181 23.9070   3
  -3   1  -9 6.90589 17.1978  15
  -3   1 -10 37.1001 25.5764   9
  -3  -1 -10 51.6613 26.2785   9
   3  -1  10 16.0706 24.1490   3
  -3   1 -10 41.6027 22.3900  15
  -3   1 -11 780.091 97.8831   9
  -3   1 -11 751.074 87.5599  15
   3  -2 -14 273.605 49.3522   9
  -3   2  13 9.04128 24.4236   3
  -3  -2  13 9.50156 23.5832   3
   3  -2 -13 20.6624 21.6403   9
   3   2 -13 53.9012 22.2699   9
   3   2 -13-5.06704 30.9423  13
   3  -2 -13 47.7440 25.7622  12
  -3   2  12 134.109 33.0588   3
  -3  -2  12 119.155 32.8805   3
   3  -2 -12 113.603 29.4025  12
   3   2 -12 240.150 44.2885  13
   3  -2 -12 231.971 45.6452  13
   3   2 -12 136.237 28.1193   9
   3  -2 -12 170.296 34.1787   9
   3  -2 -11 251.661 39.8014  12
   3  -2 -11 348.033 48.1248  13
   3   2 -11 305.805 38.1507   9
   3   2 -11 377.251 49.9010  13
  -3   2  11 170.344 37.7752   3
  -3  -2  11 177.940 38.4442   3
   3  -2 -11 295.243 42.3235   9
   3   2 -10 397.076 46.2601   9
   3  -2 -10 393.736 49.6325  12
  -3   2  10 281.650 48.0744   3
  -3  -2  10 300.340 49.2005   3
   3   2 -10 472.333 56.6566  13
   3  -2 -10 502.001 56.6408  13
  -3  -2  10 396.848 46.4367   4
  -3  -2   9 2052.89 214.984   4
   3   2  -9 2439.09 212.910   9
   3  -2  -9 2170.83 211.049   1
  -3  -2   9 1685.44 215.357   3
  -3   2   9 1776.72 215.340   3
   3   2  -9 2857.38 223.413  13
   3  -2  -9 2754.29 222.232  13
   3  -2  -9 1924.98 214.779  12
  -3  -2   8 5249.11 476.448   4
   3   2  -8 4993.42 470.276   9
   3  -2  -8 4716.23 469.127   1
  -3  -2   8 4462.47 475.224   3
  -3   2   8 4589.91 475.000   3
   3   2  -8 5459.90 477.888  13
   3  -2  -8 5656.93 478.068  13
   3  -2  -8 4546.04 473.910  12
  -3  -2   7 3370.24 285.402   4
   3   2  -7 2904.16 278.486   9
  -3  -2   7 2482.81 282.803   3
  -3   2   7 2291.00 281.602   3
   3   2  -7 3210.27 285.550  13
   3  -2  -7 3238.00 285.426  13
   3  -2  -7 2810.97 277.620   1
  -3  -2   7 2695.27 279.481   1
  -3  -2   7 3296.62 280.246  12
   3  -2  -7 2876.56 283.126  12
   3   2  -7 2932.18 279.123  12
  -3  -2   6 1298.22 146.884   3
  -3   2   6 1385.44 146.954   3
   3   2  -6 1457.15 142.172   9
   3  -2  -6 1413.97 141.555   1
  -3  -2   6 1527.38 145.245   1
  -3  -2   6 1615.93 143.915  12
   3  -2  -6 1308.80 146.355  12
   3   2  -6 1430.93 142.883  12
  -3  -2   6 1902.72 150.769  11
  -3  -2   5 948.746 94.5949  15
  -3  -2   5 803.912 97.2311   3
  -3   2   5 857.274 97.2335   3
  -3  -2   5 834.674 95.6114  13
  -3   2   5 887.201 95.6826  13
  -3   2   5 910.826 92.5739  11
  -3  -2   5 1137.90 96.4322  10
   3   2  -5 1005.60 92.4813   9
   3   2  -5 911.801 93.0947  12
   3  -2  -5 934.769 97.9090  12
  -3  -2   5 1052.17 94.2223  12
   3  -2  -5 942.835 92.0230   1
  -3  -2   5 1012.68 96.9403   1
  -3   2   5 1032.27 95.3964   2
   3   2  -4 87.6727 10.7800  12
  -3  -2   4 105.048 12.0332  12
  -3  -2   4 77.3648 13.9291  13
  -3  -2   4 101.978 17.3175  11
   3  -2  -4 117.419 14.6117  10
  -3  -2   4 119.285 14.9432  10
   3   2  -4 134.874 15.6538  10
  -3   2   4 118.794 15.1424  10
   3   2  -4 84.2446 9.84899   9
  -3   2   4 98.8501 14.7954  13
  -3  -2   4 85.1592 12.7247  15
  -3   2   4 70.6064 12.6006   2
   3   2  -3 498.370 66.9874  11
  -3  -2   3 701.602 67.3088  11
  -3   2   3 793.967 65.7217  10
  -3  -2   3 723.581 64.8046  10
   3  -2  -3 687.172 64.3232  10
   3   2  -3 593.811 63.8416  10
  -3  -2   3 588.733 62.6948  15
  -3  -2   3 723.422 67.2755   8
   3   2  -3 585.626 60.2867  12
   3  -2  -3 631.208 63.9882   2
  -3   2   3 681.162 65.4861   2
  -3  -2   2 5634.17 515.780   2
   3   2  -2 6089.12 519.701  11
   3   2  -2 5853.70 515.724  10
  -3   2   2 6397.30 517.044  10
  -3  -2   2 5674.05 515.726  10
   3  -2  -2 4703.16 514.331  10
  -3  -2   2 4685.96 512.724  15
   3  -2  -2 4669.40 515.422   2
  -3   2   2 5582.50 515.341   6
  -3  -2   2 5892.25 519.202   8
  -3  -2   2 5923.03 516.412   7
   3   2  -1 5110.68 460.204  12
   3   2  -1 5536.63 469.472  11
   3   2  -1 4315.19 464.966  10
   3  -2  -1 4399.05 464.373  10
  -3  -2   1 5075.55 461.540   9
  -3   2   1 4638.86 460.713   1
  -3  -2   1 5390.30 466.246   2
   3   2  -1 4143.97 468.305   8
   3   2  -1 5368.48 465.750   7
   3   2  -1 4919.19 463.673   2
  -3  -2   1 5188.13 467.018   7
  -3  -2   1 5233.28 469.438   6
   3  -2  -1 3903.33 463.289   6
   3   2   0 4043.58 492.437   7
   3   2   0 5339.84 487.621  12
   3   2   0 5285.01 496.702  11
   3   2   0 5446.94 490.876   2
  -3   2   0 5357.97 496.617   5
  -3  -2   0 5270.14 495.078   5
  -3   2   0 4821.77 487.968   1
  -3  -2   0 5212.44 489.431   9
  -3   2   0 5021.77 493.242   9
  -3   2   0 5332.81 488.125   7
   3   2   1 6269.35 604.582   2
  -3   2  -1 6414.55 601.523   1
  -3  -2  -1 6750.21 605.484   3
  -3   2  -1 7972.56 608.508   3
  -3   2  -1 6471.38 606.332   9
  -3  -2  -1 6619.98 603.735   9
   3   2   1 6431.91 601.060  12
   3   2   1 4890.52 606.953   5
   3  -2   1 4885.50 605.728   5
   3  -2   1 6151.38 601.627   7
  -3   2  -1 6778.40 606.148  14
   3   2   2 4941.50 442.688  12
   3   2   2 4161.33 450.023   5
   3  -2   2 4097.01 449.038   5
  -3  -2  -2 4866.74 445.823   9
  -3   2  -2 5023.97 448.268   9
  -3   2  -2 4489.69 442.787   1
  -3  -2  -2 5537.72 447.504   3
   3   2   2 4395.68 449.849   3
   3  -2   2 4322.58 448.822   3
   3   2   2 4743.92 442.427  14
   3  -2   2 4109.95 445.053  14
  -3  -2  -2 4615.04 439.831  15
  -3  -2  -3 1069.32 111.104  15
  -3   2  -3 1218.61 117.001  15
   3   2   3 1035.52 120.589   3
   3  -2   3 1103.04 120.662   3
  -3  -2  -3 1456.32 119.651   3
  -3   2  -3 1598.41 122.128   3
  -3  -2  -3 1192.98 118.121   9
   3   2   3 965.074 120.728   5
   3  -2   3 1086.27 121.007   5
   3   2   3 1233.40 114.520  12
   3   2   3 1152.67 112.993  14
   3  -2   3 1055.25 116.241  14
  -3   2  -4 480.693 56.2279   4
  -3  -2  -4 434.541 53.9343   9
   3   2   4 418.188 56.5186   3
   3  -2   4 505.898 58.1527   3
   3   2   4 507.495 49.5837  14
  -3  -2  -4 451.395 47.5398  15
  -3   2  -4 503.971 53.3451  15
   3   2   5 5.44478 7.74850  14
  -3   2  -5 10.7551 11.1955   4
  -3   2  -5 2.62672 11.7645   9
  -3  -2  -5 17.8808 11.9480   9
   3   2   5 12.8885 11.9151   3
   3  -2   5 3.07041 13.1025   3
  -3   2  -5 19.1961 10.1488  15
  -3  -2  -5 12.2155 6.82834  15
  -3   2  -6 1467.89 149.240   4
   3   2   6 1371.19 151.574   3
   3  -2   6 1252.66 149.984   3
  -3  -2  -6 1322.94 148.456   9
  -3   2  -6 1398.14 148.888   9
  -3   2  -6 1655.52 145.951  15
  -3  -2  -6 1514.92 140.350  15
   3   2   6 1335.95 140.777  14
  -3  -2  -7 1638.48 168.121   9
  -3   2  -7 1509.06 166.424   9
  -3   2  -7 1538.05 163.634   4
  -3   2  -7 1802.43 162.608  15
  -3  -2  -7 1620.94 157.249  15
   3   2   7 1448.55 168.430   3
   3  -2   7 1495.19 168.766   3
   3   2   8 782.401 104.557   3
   3  -2   8 735.298 103.398   3
  -3   2  -8 1114.84 100.468  15
  -3   2  -8 950.862 104.902   9
   3   2   9 1324.49 163.758   3
   3  -2   9 1282.95 162.937   3
  -3   2  -9 1790.63 157.856  15
  -3   2  -9 1541.70 164.377   9
   3   2  10 832.185 121.606   3
   3  -2  10 1010.73 125.747   3
  -3   2 -10 1111.92 125.540   9
  -3  -2 -10 1065.00 123.752   9
  -3   2 -10 1277.63 118.000  15
  -3   2 -11 606.899 74.9459  15
   3  -3 -13 420.514 56.5566  12
  -3   3  13 254.935 50.4661   3
  -3  -3  13 363.343 56.5641   3
   3  -3 -13 363.315 55.1913   9
   3  -3 -12 1662.66 181.209   9
   3   3 -12 1860.69 176.352   9
   3  -3 -12 2183.81 186.895  13
   3   3 -12 2445.78 192.005  13
   3  -3 -12 1586.30 178.320  12
  -3   3  12 1256.62 175.464   3
  -3  -3  12 1279.02 176.881   3
  -3   3  12 1864.36 172.455   2
   3  -3 -11 92.3403 25.3615  12
   3   3 -11 83.7712 29.2084  13
   3  -3 -11 119.159 31.8561  13
  -3   3  11 59.4905 22.4565   3
  -3  -3  11 55.9103 23.7472   3
  -3   3  11 93.0736 19.5143   2
   3   3 -11 88.7106 21.7246   9
  -3   3  10 1324.31 152.536   3
  -3  -3  10 1214.51 152.632   3
   3   3 -10 1588.03 150.200   9
   3  -3 -10 1325.29 153.008  12
  -3   3  10 1480.78 148.377   2
  -3  -3  10 1404.87 151.931   4
   3   3 -10 1803.05 160.137  13
   3  -3 -10 1869.72 159.681  13
   3  -3  -9 23.2441 10.6723   1
  -3   3   9 24.9639 10.6013   2
   3  -3  -9 22.5910 15.0325  12
   3   3  -9 24.2840 16.6569  13
   3  -3  -9 14.4919 17.2851  13
  -3  -3   9 11.8700 13.6215   3
  -3   3   9 2.79847 12.8552   3
  -3  -3   9 3.08478 15.3225   4
   3   3  -9 13.4777 9.99189   9
   3   3  -8 52.2191 18.3295  15
   3  -3  -8 72.9117 19.4843  13
   3  -3  -8 53.7770 15.8256  12
   3   3  -8 52.3000 18.1159  13
  -3  -3   8 30.5332 16.1607   4
  -3   3   8 55.5533 11.4077   4
   3  -3  -8 62.6128 12.3500   1
  -3  -3   8 63.0688 15.0893   1
  -3   3   8 58.4907 12.4707   2
  -3  -3   8 36.2395 16.5395   3
  -3   3   8 51.2503 16.6815   3
   3   3  -8 42.7627 11.6239   9
   3   3  -7 547.728 54.3141   9
  -3  -3   7 620.991 64.8527   4
  -3   3   7 424.226 53.8403   4
  -3  -3   7 425.061 57.7522   3
  -3   3   7 452.805 58.0781   3
  -3  -3   7 594.913 55.3253  12
   3  -3  -7 554.697 52.9950   1
  -3  -3   7 510.434 57.1583   1
   3  -3  -6 3188.92 301.251   1
  -3  -3   6 2940.04 306.591   1
  -3  -3   6 3901.36 313.022   4
  -3   3   6 2924.47 302.994   2
   3   3  -6 3444.96 302.845   9
  -3  -3   6 2782.27 306.735   3
  -3   3   6 2827.82 306.430   3
  -3  -3   6 3315.09 303.050  12
  -3  -3   5 82.8535 16.2444  13
  -3   3   5 101.314 16.3974  13
   3   3  -5 102.192 17.8509  15
  -3  -3   5 173.639 23.1533  11
  -3  -3   5 170.428 18.1984  10
   3   3  -5 107.452 13.3715   9
  -3  -3   5 116.060 15.5746  15
  -3  -3   5 112.606 18.6902   3
  -3   3   5 114.294 18.1975   3
  -3   3   5 89.0775 14.4685   2
  -3  -3   5 92.3778 18.6280   1
  -3  -3   5 135.094 14.4390  12
  -3  -3   4 11171.9 867.524  10
  -3   3   4 10761.1 867.889  10
  -3   3   4 8791.28 866.186   2
  -3  -3   4 9112.37 862.904  12
  -3  -3   4 8172.71 866.020  13
  -3   3   4 8072.90 865.608  13
  -3  -3   4 8951.50 864.736  15
  -3  -3   4 8738.69 867.950   3
   3   3  -3 1068.91 112.566  11
   3  -3  -3 1075.07 106.867  10
  -3  -3   3 1204.28 107.953  10
  -3   3   3 1189.68 108.662  10
   3   3  -3 1034.10 107.054  10
   3  -3  -3 1138.76 103.646   1
  -3  -3   3 947.340 107.238  13
  -3  -3   3 1084.77 109.618   2
   3  -3  -3 977.628 106.720   2
   3   3  -3 1061.95 107.789  15
  -3  -3   3 1038.76 105.622  15
   3   3  -2 6731.22 621.919  11
   3  -3  -2 6977.70 616.329  10
   3   3  -2 7543.41 617.310  10
  -3  -3   2 5931.75 613.383  15
   3   3  -2 5531.34 620.367   8
  -3   3   2 5737.59 614.134   8
  -3  -3   2 6774.85 617.401   2
   3  -3  -2 6769.84 613.101   1
   3  -3  -2 5564.46 617.357   2
  -3  -3   2 6656.11 620.210   6
  -3   3   2 7125.49 616.389   6
  -3  -3   2 7185.84 620.461   7
   3   3  -1 345.820 32.4513  12
   3   3  -1 350.243 40.5870  11
   3  -3  -1 320.750 36.2589  10
   3   3  -1 307.722 36.8599  10
  -3  -3   1 321.911 32.4200  15
   3   3  -1 322.752 43.4397   8
   3   3  -1 284.413 38.9404   7
   3   3  -1 351.567 39.2003   6
  -3  -3   1 340.133 40.9440   6
   3  -3  -1 257.206 34.2530   6
  -3  -3   1 354.038 37.1823   2
   3   3  -1 368.201 35.9217   2
   3   3   0 163.524 29.7213   7
   3   3   0 194.197 31.0853   6
   3   3   0 259.664 23.7010  12
   3   3   0 209.386 25.0646   2
  -3  -3   0 192.369 28.2709   5
  -3   3   0 255.150 31.6142   5
  -3  -3   0 221.351 27.4556   3
  -3   3   0 307.122 31.0146   3
   3   3   0 195.878 33.9761   8
  -3   3   0 212.003 26.5746   7
  -3  -3   0 209.857 21.6079  15
  -3   3   0 253.510 25.1562   1
   3   3   1 23.4457 11.1694   5
  -3   3  -1 28.3277 10.6211   9
   3   3   1 24.3859 7.07858   2
  -3   3  -1 24.9735 7.03383   1
   3   3   1 18.5935 12.5941   6
   3   3   1 33.9717 6.53845  12
  -3  -3  -1 20.6943 6.64618  12
  -3  -3  -1 21.5953 9.54368   3
  -3   3  -1 14.7693 8.99450   3
   3  -3   2 2987.00 346.306   5
   3   3   2 3448.44 349.636   5
  -3  -3  -2 4312.26 345.289   3
  -3  -3  -2 3765.14 342.900  12
   3  -3   2 3891.11 342.979   7
  -3   3  -2 3681.70 342.261   1
   3   3   2 3571.98 343.319   2
  -3   3  -3 771.062 75.5641  15
   3  -3   3 838.991 72.1867   7
   3   3   3 570.209 77.3670   5
  -3   3  -3 613.834 76.7286   4
   3  -3   3 522.522 75.1713   5
   3   3   3 593.032 76.8110   3
   3  -3   3 584.772 75.5137   3
  -3  -3  -3 768.217 74.3795   3
  -3   3  -3 851.730 77.2276   3
   3   3   3 704.726 70.9293  12
  -3  -3  -3 575.721 71.8007  12
   3   3   3 740.348 68.2669  14
  -3   3  -4 5251.96 514.780   4
  -3   3  -4 5047.40 512.696   9
  -3  -3  -4 5187.89 511.906   9
  -3   3  -4 5915.52 511.177  15
   3   3   4 5643.98 516.227   3
   3  -3   4 5508.12 514.190   3
  -3  -3  -4 4905.93 508.940  12
   3   3   4 5222.28 503.825  14
  -3   3  -5 283.262 34.6801  15
   3  -3   5 256.850 36.7862   3
  -3   3  -5 203.652 36.4108   4
  -3  -3  -5 279.202 35.8493   9
  -3   3  -5 226.274 34.9585   9
  -3  -3  -5 326.323 30.1871   4
   3   3   5 171.037 33.8343   3
   3   3   5 193.317 26.4983  14
  -3  -3  -6 3621.10 274.296   4
  -3   3  -6 2485.27 281.988   4
  -3   3  -6 2899.42 283.485   9
  -3  -3  -6 2558.91 281.371   9
   3   3   6 2545.30 272.056  14
   3   3   6 2422.07 282.390   3
   3  -3   6 2454.03 281.997   3
  -3   3  -6 3252.74 279.748  15
   3   3   7 531.566 69.9101   3
   3  -3   7 595.153 70.4184   3
  -3   3  -7 584.437 64.1658  15
  -3  -3  -7 485.402 66.7849   9
  -3   3  -7 511.782 67.5786   9
  -3  -3  -8 247.478 40.0947   9
  -3   3  -8 212.737 37.8893   9
   3   3   8 146.133 36.4623   3
   3  -3   8 154.972 36.1984   3
  -3   3  -8 267.930 36.2522  15
  -3   3  -9 44.4879 26.4099   9
   3  -3   9 75.9561 28.0522   3
   3   3   9 77.8506 26.3711   3
  -3   3  -9 108.359 26.4622  15
  -3   3 -10 118.046 36.2071   9
  -3   3 -10 255.174 38.2768  15
   3   3  10 153.568 39.4695   3
   3  -3  10 130.666 38.7174   3
  -3   3 -11 107.224 32.3254  15
   3  -4 -13 59.3381 28.7799   9
   3  -4 -12 24.1697 22.6237  12
  -3   4  12 65.2907 24.4930   3
  -3  -4  12 25.0501 24.0921   3
  -3   4  11 871.937 84.7218   2
   3  -4 -11 792.778 94.2495  12
  -3   4  11 717.353 91.5724   3
  -3  -4  11 731.039 93.2123   3
   3   4 -11 855.646 89.5966   9
   3   4 -10 149.921 23.8468   9
   3  -4 -10 104.035 26.5173  12
   3   4 -10 155.322 32.2017  13
  -3   4  10 120.947 26.3851   3
  -3  -4  10 107.979 26.2930   3
  -3  -4  10 146.814 30.7257   4
  -3   4  10 134.138 20.0873   2
  -3  -4   9 2431.78 227.567   4
  -3   4   9 2107.02 213.251   2
   3   4  -9 2443.61 217.207   9
  -3   4   9 1995.28 219.400   3
  -3  -4   9 2008.39 220.339   3
  -3  -4   9 2316.04 219.265   1
   3  -4  -9 2178.67 213.599   1
   3   4  -8 153.567 21.6341   9
  -3  -4   8 140.655 25.5796   3
  -3   4   8 119.558 24.0981   3
  -3  -4   8 149.839 29.8524   4
   3  -4  -8 143.668 19.6308   1
  -3  -4   8 180.005 25.7902   1
  -3  -4   7 4304.12 237.758  12
  -3  -4   7 3723.78 244.539   1
   3   4  -7 3535.04 237.015   9
   3   4  -7 3946.73 246.652  15
  -3  -4   7 4487.56 260.298   4
  -3   4   7 2720.39 237.667   4
  -3  -4   7 3543.06 244.024   3
  -3   4   7 3574.08 243.133   3
  -3   4   7 3408.79 235.351   2
  -3  -4   6 255.012 31.3165   1
  -3   4   6 138.061 25.1224   4
  -3  -4   6 167.954 26.7074   3
  -3   4   6 175.450 26.6707   3
  -3  -4   6 257.595 36.0351   4
   3   4  -6 224.684 29.2707  15
  -3   4   6 188.739 23.4734   2
  -3  -4   6 241.412 23.7939  12
  -3  -4   5 1495.08 146.158   4
  -3   4   5 1071.01 138.326   4
  -3  -4   5 1720.27 138.364  10
  -3   4   5 1605.70 138.341  10
  -3  -4   5 1158.10 138.009   3
  -3   4   5 1332.55 138.391   3
  -3  -4   5 1432.48 143.057   1
  -3   4   5 1338.26 136.219   2
   3  -4  -5 1255.64 141.384  12
  -3  -4   5 1485.68 134.357  12
   3   4  -5 1311.60 139.508  15
  -3  -4   4 36.7155 8.69330  13
  -3   4   4 30.6708 7.72126  13
  -3  -4   4 26.8053 9.40608   3
  -3   4   4 37.0810 9.14948   3
   3  -4  -4 17.6866 9.37327  12
  -3  -4   4 16.5660 3.64700  12
  -3   4   4 12.7519 7.57101  10
  -3  -4   4 15.7168 6.74787  10
  -3  -4   4 18.3369 4.18731   9
  -3  -4   4 30.6073 12.9878   4
  -3  -4   4 27.7938 7.34030  15
  -3  -4   3 1130.83 119.352  13
  -3   4   3 1123.17 118.826  13
   3  -4  -3 1278.93 117.897   1
   3   4  -3 1198.06 126.568  11
  -3  -4   3 1201.26 119.987  10
  -3   4   3 1512.66 121.934  10
   3  -4  -3 1218.71 118.874  10
   3   4  -3 1225.43 119.322  10
  -3  -4   3 1322.29 117.886   9
  -3  -4   3 1037.80 117.697  15
   3   4  -3 1299.97 120.647  15
  -3   4   3 904.900 122.917   8
  -3   4   3 1332.75 117.571   6
  -3  -4   3 1311.58 122.562   2
   3  -4  -3 1090.35 118.811   2
   3   4  -2 119.606 20.9361  11
   3  -4  -2 107.076 14.7459  10
   3   4  -2 136.087 16.0499  10
   3  -4  -2 111.182 14.1477   1
  -3  -4   2 112.276 16.7778   2
  -3   4   2 123.430 15.9466   8
   3   4  -2 133.012 22.6751   8
  -3  -4   2 148.636 20.5828   6
   3   4  -2 100.942 14.8704  15
  -3  -4   2 107.276 13.6451  15
  -3  -4   1 4864.85 459.338  12
  -3  -4   1 5324.46 464.270   2
   3   4  -1 5394.86 464.046  10
   3  -4  -1 4577.58 462.149  10
   3  -4  -1 5288.25 461.793   1
   3   4  -1 3785.31 468.249   7
   3   4  -1 4355.57 472.219   8
  -3  -4   1 4669.41 459.195  15
  -3   4   1 5595.12 468.529   5
  -3  -4   1 4497.60 464.309   5
   3  -4  -1 4701.56 459.809   6
  -3  -4   1 5405.56 470.428   6
  -3  -4   0 111.441 13.9661  12
   3   4   0 109.105 14.2847  12
   3   4   0 113.886 15.0181   2
  -3   4   0 103.526 18.6044   3
  -3   4   0 105.295 19.5655   5
  -3  -4   0 128.455 18.4491   5
   3  -4   0 137.170 16.2988   1
  -3  -4   0 128.177 18.2185   2
  -3   4   0 139.010 20.5703   7
   3  -4   0 111.165 15.8371   8
   3   4   0 108.740 24.4383   8
  -3  -4   0 114.686 16.9755   3
  -3  -4   0 105.612 11.6881  14
   3   4   0 83.3445 21.7474   7
   3   4   0 132.511 20.7056   6
   3  -4   1 6896.58 744.944  14
   3   4   1 8584.39 739.732  12
  -3  -4  -1 7258.27 739.764  12
   3   4   1 8663.39 749.194  11
   3   4   1 7590.86 739.187   2
   3   4   1 7211.01 747.109   6
  -3   4  -1 6542.06 740.707   1
  -3  -4  -1 8731.01 742.231   3
  -3   4  -1 9710.66 745.110   3
  -3   4  -1 7120.92 746.906   4
   3   4   1 7873.85 758.010   8
   3   4   2 15.2675 12.9980   6
  -3  -4  -2 2.58663 5.91373  12
   3   4   2 10.9555 10.4304   5
   3  -4   2 10.9180 9.97083   5
   3   4   2-2.81672 10.7265  11
  -3  -4  -2 2.69930 7.82024   3
  -3   4  -2 4.02136 7.66167   1
   3   4   2 1.92140 5.42115   2
   3   4   3 2117.23 241.732   5
   3  -4   3 2097.94 239.425   5
   3   4   3 2111.07 233.956   2
  -3   4  -3 2106.46 239.730   9
  -3  -4  -3 2973.37 237.807   3
   3   4   3 2421.00 242.579   3
   3  -4   3 2396.07 240.203   3
   3  -4   3 2481.11 236.633   7
  -3  -4  -3 2161.44 235.696  12
  -3   4  -3 2649.33 240.411  15
   3   4   4 38.8050 6.42940  14
  -3  -4  -4 57.7681 13.4177   4
   3   4   4 30.8167 15.7143   3
   3  -4   4 51.5797 16.1761   3
  -3   4  -4 41.6414 14.9706   9
  -3  -4  -4 27.2134 11.4509  12
   3  -4   4 46.9857 12.3553   7
  -3   4  -4 49.9461 16.6164  15
  -3  -4  -5 4.56154 10.6777  12
  -3   4  -5 14.3865 14.0983  15
  -3  -4  -5 18.1157 13.5109   9
  -3   4  -5 3.05517 12.3729   9
  -3  -4  -5 49.4573 14.8476   4
   3  -4   5 3.01032 12.5244   3
   3   4   5 20.2235 15.4121   3
   3   4   5 7.07922 5.76588  14
  -3  -4  -6 31.4793 15.8609  12
  -3  -4  -6 25.8512 11.6072   4
  -3   4  -6 12.7002 15.5514  15
  -3  -4  -6 13.6005 13.8119   9
  -3   4  -6 23.6925 16.4928   9
   3   4   6 17.5775 7.50366  14
   3   4   6-7.32097 18.4935   3
   3  -4   6 30.4914 18.0135   3
   3   4   7 1825.66 194.708   3
   3  -4   7 1810.42 193.852   3
  -3   4  -7 2227.07 191.730  15
  -3   4  -7 1820.21 193.501   9
  -3  -4  -7 1585.14 191.357   9
  -3   4  -8 41.2592 25.1442   9
  -3  -4  -8 71.5736 25.0116   9
  -3   4  -8 55.9533 22.7656  15
   3   4   8 22.1084 20.5646   3
   3  -4   8 29.4887 22.6681   3
  -3   4  -9 2291.48 218.542   9
  -3  -4  -9 1975.91 216.046   9
  -3   4  -9 2616.87 213.510  15
   3   4   9 1649.67 212.933   3
   3  -4   9 1758.87 213.863   3
  -3   4 -10 10.2545 23.6828  15
   3   4  10 5.19919 23.7302   3
   3  -4  10 15.4911 24.5710   3
  -3   4 -10-4.92203 22.4660   9
   3  -5 -12 596.338 81.3500  12
  -3   5  12 648.915 80.8305   3
  -3  -5  12 763.659 85.8004   3
  -3   5  11 454.969 60.8075   3
  -3  -5  11 486.581 63.2418   3
  -3   5  10 570.811 73.4788   3
  -3  -5  10 668.054 76.4926   3
  -3   5  10 626.281 65.9392   2
  -3  -5  10 875.492 86.1925   4
   3   5 -10 618.202 71.2354   9
  -3   5   9 12.0198 7.05156  11
   3   5  -9 46.4870 13.5059   9
  -3  -5   9 65.8146 25.8475   4
  -3  -5   9 52.5716 18.8716   1
  -3  -5   9 37.7526 17.9400   3
  -3   5   9 29.9099 15.3771   3
   3   5  -8 123.706 25.4163  15
  -3  -5   8 92.1688 26.7927   4
   3  -5  -8 67.4588 21.5255  12
  -3   5   8 49.5575 8.31271  11
  -3  -5   8 72.3333 19.2368   1
  -3   5   8 92.9196 12.5783   2
  -3  -5   8 73.4263 19.0567   3
  -3   5   8 88.3414 18.8051   3
  -3  -5   7 1.05581 7.24401  12
  -3  -5   7-21.1028 21.2483   4
  -3   5   7 2.08775 10.3215   4
   3   5  -7-7.26947 15.1180  15
   3  -5  -7-2.83200 11.7449  12
  -3  -5   7 2.12155 10.6811   3
  -3   5   7 13.7453 11.6672   3
  -3  -5   7 7.85681 12.2070   1
  -3   5   7 2.69092 6.49967   2
  -3  -5   6 2514.85 228.720   1
  -3  -5   6 2452.88 218.299  12
   3  -5  -6 1848.39 225.242  12
  -3  -5   6 2218.09 222.849   3
  -3   5   6 2205.50 222.123   3
   3   5  -6 2464.15 225.430  15
  -3   5   6 1799.03 222.941   4
  -3  -5   6 2805.23 237.490   4
  -3   5   5 904.488 113.733   4
  -3  -5   5 1267.47 124.570   4
  -3   5   5 1357.81 112.747  10
  -3  -5   5 1468.75 112.467  10
  -3  -5   5 1121.76 108.125   9
   3  -5  -5 973.260 115.635  12
  -3  -5   5 1089.41 107.381  12
  -3  -5   5 949.430 111.320   3
  -3   5   5 931.120 110.528   3
   3   5  -5 1118.80 113.548  15
  -3  -5   5 1179.79 119.287   1
  -3  -5   4 4429.64 402.866  12
   3  -5  -4 4090.53 413.526  12
  -3   5   4 3507.32 410.958   4
  -3  -5   4 5380.15 422.259   4
  -3   5   4 5080.75 408.263  10
  -3  -5   4 4653.18 406.816  10
  -3  -5   4 4578.32 405.201   9
  -3  -5   4 3925.08 407.677   3
  -3   5   4 4121.43 407.215   3
  -3  -5   4 3930.16 406.099  13
  -3   5   4 3949.09 405.721  13
  -3  -5   4 3578.38 405.228  15
   3   5  -4 4319.89 408.843  15
  -3  -5   3 570.406 65.6495  15
  -3   5   3 663.949 72.1792   8
  -3   5   3 630.839 66.2541  13
  -3   5   3 364.966 70.5741  14
  -3  -5   3 633.568 66.7480  13
  -3  -5   3 779.710 73.1881   6
   3  -5  -3 666.448 65.8714  11
  -3   5   3 896.438 70.5591  10
  -3  -5   3 729.233 67.9857  10
   3  -5  -3 683.906 66.4854  10
  -3  -5   3 857.557 69.1406   9
  -3   5   3 522.306 72.1215   4
  -3  -5   3 877.681 80.5323   4
   3  -5  -3 612.010 66.5199   2
  -3  -5   2 2404.85 223.744   2
  -3   5   2 3083.25 231.321  14
  -3  -5   2 2098.46 217.461  12
   3  -5  -2 2424.15 220.906  11
  -3  -5   2 2842.08 233.025   4
   3  -5  -2 2158.91 219.660  10
   3   5  -2 2591.20 220.637  10
   3  -5  -2 2679.58 222.153   1
  -3   5   2 2426.25 223.717   8
   3   5  -2 2314.69 232.855   8
  -3  -5   2 1959.88 219.063  15
   3   5  -2 2321.26 221.064  15
  -3  -5   2 2607.09 228.015   6
   3   5  -1 754.142 78.6714  15
  -3   5   1 984.269 89.0808  14
  -3  -5   1 765.138 77.9422  12
  -3  -5   1 747.058 81.8272   5
  -3   5   1 897.974 85.7405   5
   3  -5  -1 778.168 79.4485  10
   3   5  -1 921.720 81.0103  10
   3   5  -1 776.840 93.2010   8
   3   5  -1 604.584 88.4164   7
   3  -5  -1 829.461 81.2297   1
  -3  -5   1 785.708 81.8545   2
  -3  -5   1 914.208 89.3414   6
  -3  -5   0 180.051 18.1042  14
  -3  -5   0 166.087 19.9444  12
   3   5   0 167.004 26.9726  11
   3  -5   0 116.773 20.5985  10
  -3  -5   0 188.326 21.5577   3
  -3   5   0 206.637 24.0523   3
   3   5   0 117.987 29.2196   7
   3   5   0 178.655 25.8994   6
  -3   5   0 104.576 24.7336   7
   3  -5   0 203.958 24.7660   8
   3   5   0 191.089 35.6500   8
  -3  -5   0 226.681 29.2624   4
  -3  -5   0 188.507 23.9164   2
   3  -5   1 53.6512 12.1285   1
  -3  -5  -1 44.2752 9.78879  12
   3   5   1 41.2452 10.7949  12
   3   5   1 53.5148 15.0102  11
  -3  -5  -1 62.5701 11.2511   3
  -3   5  -1 59.0765 13.3573   3
   3   5   1 37.8377 15.3954   6
  -3  -5  -1 49.0789 15.3944   4
   3  -5   1 68.1290 12.8427   8
   3   5   1 75.1122 25.2436   8
  -3  -5  -2 1192.93 101.799   3
   3   5   2 1087.18 109.466  11
  -3  -5  -2 1222.36 108.695   4
   3  -5   2 911.455 103.139   5
   3   5   2 766.336 104.303   5
  -3  -5  -2 881.371 100.389  12
   3   5   2 1189.40 101.530  12
   3   5   2 937.817 97.9645   2
   3  -5   2 979.731 102.502   1
  -3  -5  -3 686.839 79.5969  12
   3   5   3 783.171 87.0115  11
   3   5   3 662.540 84.8928   5
  -3  -5  -3 1011.46 87.4664   4
   3  -5   3 715.860 82.8595   5
   3  -5   3 745.887 83.0122   7
  -3  -5  -3 861.681 79.9031   3
  -3   5  -3 987.608 83.4831   3
  -3   5  -3 835.739 85.3634  15
   3   5   3 661.137 75.5238   2
   3   5   4 3160.95 289.954  11
   3   5   4 2694.78 277.543   2
  -3   5  -4 2800.37 287.823   9
   3  -5   4 3270.13 284.481   7
   3   5   4 2627.63 287.210   3
   3  -5   4 2869.65 285.923   3
  -3  -5  -4 2678.01 282.630  12
  -3   5  -4 3536.90 288.769  15
  -3   5  -5 522.491 64.2643   9
   3   5   5 451.915 54.0285   2
   3   5   5 620.447 66.9863   3
   3  -5   5 514.931 62.5535   3
  -3  -5  -5 492.278 59.7876  12
  -3   5  -5 619.922 64.1082  15
  -3   5  -6 3107.71 263.544  15
   3   5   6 2613.02 264.893   3
   3  -5   6 2307.69 261.434   3
  -3   5  -6 2243.12 261.990   9
  -3  -5  -6 2295.58 262.613   9
  -3  -5  -6 2359.54 259.318  12
  -3  -5  -6 3303.55 259.615   4
   3   5   7 258.025 47.1842   3
  -3   5  -7 261.584 44.9089   9
   3  -5   7 332.987 48.1422   3
  -3  -5  -7 281.748 46.9379   9
  -3   5  -7 353.642 46.6711  15
  -3  -5  -7 295.858 43.8836  12
  -3   5  -8 226.096 39.2611   9
   3  -5   8 175.224 36.6527   3
   3   5   8 136.193 36.0715   3
  -3   5  -8 272.673 38.3478  15
  -3  -5  -8 124.650 32.8200   9
  -3   5  -9 27.2645 22.3718   9
   3   5   9 57.6870 27.3256   3
   3  -5   9 82.7970 30.5590   3
  -3   5  -9 38.9744 25.2889  15
  -3  -5  -9 19.6730 22.7627   9
  -3   5 -10 83.0762 30.9797  15
  -3   5 -10 44.1346 27.3628   9
   3   5  10 41.0310 28.9824   3
   3  -5  10 71.0425 30.2676   3
  -3   6  12 17.3719 20.9068   3
  -3  -6  12-11.6047 21.4602   3
  -3  -6  11 210.649 38.8952   3
  -3   6  11 252.157 40.0038   3
  -3  -6  10 723.044 78.2505   1
  -3   6  10 572.345 72.9978   3
  -3  -6  10 602.470 74.8609   3
  -3  -6  10 764.318 87.7091   4
   3   6 -10 882.343 85.9498  15
   3  -6 -10 485.441 75.7547  12
  -3  -6   9 1346.23 125.257   1
  -3   6   9 1008.74 118.488   3
  -3  -6   9 1093.13 120.043   3
  -3  -6   9 1696.90 141.671   4
   3   6  -9 1380.65 128.437  15
   3  -6  -9 828.826 121.497  12
  -3  -6   8 1098.50 104.476   1
  -3   6   8 807.724 96.4430   3
  -3  -6   8 801.678 96.9492   3
  -3  -6   8 1174.81 115.943   4
   3   6  -8 1187.24 106.055  15
   3  -6  -8 804.951 101.609  12
  -3  -6   7 867.870 90.1786   1
  -3  -6   7 970.858 100.595   4
  -3  -6   7 694.262 82.7307   3
  -3   6   7 756.486 82.5514   3
   3   6  -7 936.790 88.9357  15
   3  -6  -7 658.530 86.9210  12
  -3  -6   6 1625.09 156.313   1
  -3  -6   6 1384.14 143.963   9
  -3  -6   6 1946.73 167.962   4
  -3  -6   6 1444.86 147.751   3
  -3   6   6 1333.64 146.752   3
   3   6  -6 1663.69 151.942  15
   3  -6  -6 1286.32 152.211  12
  -3  -6   6 1559.31 143.686  12
  -3  -6   5 552.877 56.7379  12
   3  -6  -5 451.834 65.0111  12
  -3  -6   5 761.516 79.3577   4
  -3  -6   5 666.853 60.2714  10
  -3   6   5 648.136 61.0516  10
  -3  -6   5 519.460 58.3335   9
  -3   6   5 500.821 59.6509   3
  -3  -6   5 594.863 61.3505   3
   3   6  -5 591.593 63.6658  15
  -3  -6   5 650.678 71.1867   1
  -3   6   4 2.92099 14.9719  14
  -3  -6   4 4.22296 3.39425  12
   3  -6  -4 24.4467 13.9236  12
  -3  -6   4 8.39225 16.4661   4
  -3  -6   4 1.18081 7.02881   9
  -3   6   4 1.26924 7.93008  10
  -3  -6   4-1.05288 6.88070  10
  -3   6   4 5.63995 12.0062   8
  -3   6   4 10.6797 7.40945   3
  -3  -6   4 2.33041 7.61206   3
   3   6  -4 12.5185 10.4302  15
  -3   6   3 481.691 55.1712   8
  -3  -6   3 448.109 48.8159   3
  -3   6   3 438.125 48.2760   3
  -3  -6   3 416.270 47.4877  13
  -3   6   3 448.704 47.4314  13
  -3   6   3 624.433 59.2968  14
  -3  -6   3 458.013 45.5943  12
   3  -6  -3 500.186 49.4384  11
  -3  -6   3 546.211 64.7963   4
  -3  -6   3 561.704 52.7064   9
  -3  -6   3 489.480 52.6985   2
   3  -6  -3 433.666 47.9021   2
  -3  -6   3 471.459 54.2421   6
   3   6  -2 837.699 83.2604  15
   3   6  -2 614.598 92.1020   7
  -3   6   2 834.499 87.0324   8
   3  -6  -2 881.412 85.3273   1
  -3   6   2 775.667 81.2524  13
  -3  -6   2 744.143 81.6217  14
  -3   6   2 1121.45 93.4510  14
  -3  -6   2 780.001 81.6066  13
  -3  -6   2 797.445 80.3808  12
   3  -6  -2 980.021 84.6555  11
   3  -6  -2 819.055 81.2816  10
   3   6  -2 893.285 81.7739  10
  -3  -6   2 870.704 86.0498   2
  -3  -6   2 941.965 91.0702   6
  -3  -6   1 2149.16 199.953   2
   3   6  -1 1944.61 196.392  15
  -3   6   1 2656.21 208.984  14
  -3  -6   1 1768.08 195.797  14
  -3  -6   1 1835.91 195.886  12
   3   6  -1 2234.63 209.802  11
   3  -6  -1 2527.17 200.632  11
   3   6  -1 2447.56 197.297  10
   3  -6  -1 2160.54 196.311  10
  -3  -6   1 1777.43 196.793   3
  -3   6   1 2591.73 200.098   3
   3   6  -1 1637.69 209.797   8
   3   6  -1 1557.46 209.250   7
  -3  -6   1 1868.90 197.812   5
  -3   6   1 2106.96 200.873   5
  -3  -6   1 2167.50 207.388   6
  -3   6   1 1861.54 211.394   7
  -3   6   0 3827.94 290.284  14
  -3  -6   0 2441.28 277.509  12
   3   6   0 3023.79 288.746  11
   3   6   0 3245.21 280.326  10
   3  -6   0 2578.76 277.665  10
  -3  -6   0 2777.70 277.452   3
  -3   6   0 3359.21 279.821   3
  -3   6   0 2437.79 286.982   7
   3  -6   0 3125.56 284.447   8
   3  -6   0 3237.67 282.036   1
  -3  -6   0 2993.63 281.194   2
  -3  -6   0 3577.50 294.115   4
   3   6   0 2091.11 291.435   7
  -3  -6  -1 3103.53 375.408  12
   3   6   1 3866.41 384.379  11
  -3  -6  -1 4405.78 389.520   4
  -3   6  -1 4628.83 377.609   3
  -3  -6  -1 3890.25 375.117   3
   3  -6   1 4049.39 379.804   8
   3  -6   1 4059.22 379.318   1
  -3   6  -1 5074.51 387.027  14
   3   6   1 3793.13 381.384   6
   3   6   1 3112.47 393.360   7
  -3  -6  -2 1486.90 133.877   4
  -3  -6  -2 1265.15 120.810   3
  -3  -6  -2 1034.60 121.428  12
   3  -6   2 1332.05 125.338   1
   3  -6   2 1232.13 123.789   8
   3   6   2 1152.08 128.692  11
  -3  -6  -3 69.3083 13.7437   3
  -3   6  -3 81.2567 16.1509   3
   3   6   3 74.9001 18.8371  11
   3  -6   3 45.2668 15.6221   5
   3   6   3 57.7295 18.6327   5
  -3  -6  -3 86.4870 21.9950   4
  -3  -6  -3 55.1168 14.5777  12
  -3  -6  -4 207.000 28.6705  12
   3   6   4 243.397 34.8854  11
   3   6   4 176.704 21.4479   2
  -3   6  -4 232.836 35.9726  15
  -3  -6  -4 204.210 33.6265   4
  -3  -6  -5-2.99956 14.5523   4
   3   6   5 3.32236 14.1368  11
   3   6   5 4.03597 4.99997   2
  -3   6  -5-6.09876 17.6480  15
   3  -6   5-2.86026 14.9057   3
   3   6   5-3.36074 17.5138   3
  -3  -6  -5-2.53435 14.4679  12
   3   6   6 321.843 43.5237  11
  -3   6  -6 198.387 40.5442   9
  -3   6  -6 307.288 43.0984  15
   3   6   6 286.895 44.8785   3
   3  -6   6 255.865 41.5328   3
  -3  -6  -6 260.690 39.6113  12
  -3   6  -7 584.878 65.3945  15
   3  -6   7 586.178 66.3075   3
   3   6   7 433.610 62.9403   3
  -3   6  -7 464.439 65.4942   9
  -3  -6  -7 350.678 62.3050   9
   3   6   7 462.068 63.2860  11
  -3  -6  -7 484.056 60.8461  12
  -3   6  -8 1096.98 95.0658  15
   3   6   8 802.120 93.0677   3
   3  -6   8 857.256 93.3083   3
  -3  -6  -8 736.582 93.3080   9
  -3   6  -8 756.935 93.1991   9
  -3  -6  -8 718.528 88.1284  12
   3   6   8 490.974 84.2818  11
   3   6   9 290.686 54.0563  11
  -3   6  -9 410.535 62.6651   9
   3   6   9 456.427 64.2998   3
  -3  -6  -9 386.606 60.8643   9
  -3   6  -9 567.577 63.8040  15
   3  -6   9 344.516 58.5935   3
   3   6  10 216.686 50.4766  11
  -3   6 -10 581.292 67.0349  13
  -3  -6 -10 509.490 58.7304  13
  -3   6 -10 333.233 58.5393   9
   3   6  10 352.565 58.8576   3
   3  -6  10 315.902 57.2796   3
  -3   7  12 84.4285 24.8325   3
  -3  -7  12 10.8551 21.0230   3
   3  -7 -11 679.899 102.135  12
  -3   7  11 921.707 100.715   3
  -3  -7  11 876.219 102.155   3
  -3  -7  10-15.6140 26.6665   4
   3  -7 -10-8.11129 18.5053  12
   3   7 -10 4.06678 24.7751  15
  -3  -7  10-6.93509 20.3370   1
  -3   7  10 24.3515 18.2029   3
  -3  -7  10-2.94021 17.0158   3
  -3  -7   9 87.4684 36.4661   4
   3  -7  -9 41.6676 22.6236  12
  -3  -7   9 47.8367 23.4331   1
   3   7  -9 43.9979 27.5931  15
  -3   7   9 71.0294 19.9150   3
  -3  -7   9 68.9163 20.7913   3
  -3  -7   8 78.3800 34.4217   4
  -3  -7   8 69.6994 23.6700   1
   3  -7  -8 28.0010 17.6041  12
   3   7  -8 41.9498 22.4119  15
  -3   7   8 56.8925 16.9385   3
  -3  -7   8 47.8422 17.6825   3
   3  -7  -7 109.287 25.4254  12
   3   7  -7 78.0208 23.6325  15
  -3   7   7 92.3180 18.3194   3
  -3  -7   7 90.9075 18.3451   3
  -3  -7   7 80.7266 26.1292   1
  -3  -7   6 333.187 46.7596   1
  -3   7   6 273.833 34.8367   3
  -3  -7   6 297.312 35.9495   3
  -3  -7   6 297.816 52.3921   4
   3  -7  -6 243.728 41.1050  12
   3   7  -6 357.544 41.6578  15
   3  -7  -5 2570.24 308.829  12
  -3  -7   5 3437.97 323.356   4
  -3  -7   5 3771.12 318.083   1
  -3  -7   5 3262.37 302.922   3
  -3   7   5 3013.23 302.113   3
  -3   7   5 2957.42 312.617   8
   3   7  -5 3535.15 307.742  15
  -3   7   5 2899.70 309.895  14
  -3   7   4 403.029 45.0311  14
   3  -7  -4 282.899 44.0999  12
  -3  -7   4 311.372 33.7767  12
  -3  -7   4 385.191 54.6741   4
  -3   7   4 364.513 38.4803  10
  -3  -7   4 322.554 39.4787   9
  -3  -7   4 353.839 36.7797   3
  -3   7   4 289.372 35.6813   3
  -3   7   4 383.079 47.3184   8
   3   7  -4 333.280 39.8907  15
  -3  -7   4 363.982 43.0194   6
   3   7  -3 2552.53 235.867  15
  -3   7   3 2875.60 242.580  14
  -3  -7   3 2219.20 231.030  12
   3  -7  -3 2501.57 235.498  11
   3  -7  -3 2257.31 232.147   2
  -3  -7   3 2566.78 238.242   2
  -3  -7   3 2767.33 253.676   4
  -3  -7   3 3105.94 241.065   9
  -3  -7   3 2525.92 240.452   6
  -3   7   3 2647.39 242.398   8
  -3  -7   3 2551.60 232.668   3
  -3   7   3 2153.99 231.913   3
  -3  -7   2 13.6633 5.43417  13
  -3   7   2 10.0398 5.00271  13
  -3  -7   2 11.2299 7.65569  14
  -3   7   2 15.2910 13.7719  14
  -3  -7   2 10.4356 11.1693   6
   3   7  -2 50.0942 21.6993   7
   3   7  -2 3.50582 16.3874  11
   3  -7  -2 21.5966 10.0242  11
  -3  -7   2 15.8427 5.59827  12
  -3  -7   2 9.04796 6.67180   5
  -3   7   2 18.9339 8.90774   5
  -3  -7   2 12.4883 5.96277   3
  -3   7   2 10.7705 6.20313   3
  -3   7   2 23.2569 8.28753   3
  -3  -7   2 4.70930 8.40713   2
  -3  -7   1 1225.82 111.052   2
   3   7  -1 1173.96 107.680  15
   3   7  -1 734.193 120.269   7
   3  -7  -1 1221.88 112.809   1
  -3  -7   1 1062.17 105.832  13
  -3   7   1 1288.20 118.567  14
  -3  -7   1 928.936 106.856  14
  -3  -7   1 957.659 106.896  12
   3  -7  -1 1302.02 112.388  11
   3   7  -1 1230.83 121.248  11
   3   7  -1 1231.76 105.836  10
   3  -7  -1 1061.70 105.441  10
  -3  -7   1 880.885 105.565   3
  -3   7   1 1337.00 107.781   3
  -3  -7   1 1408.35 128.128   4
  -3  -7   1 1286.65 120.137   6
  -3   7   1 1008.47 123.986   7
  -3  -7   0 30.0009 7.45317   3
  -3   7   0 30.6458 8.29298   3
  -3  -7   0 25.7656 11.7321   2
   3  -7   0 33.4584 12.9703   1
   3   7   0 25.2629 6.69546  15
   3  -7   0 20.7782 14.9146   8
  -3   7   0 26.5508 16.0496  14
  -3  -7   0 30.3914 9.01329  12
   3   7   0 33.0509 16.3037  11
   3  -7   0 41.0153 7.18418  10
   3   7   0 40.7422 7.92635  10
  -3   7   0 31.4509 16.5692   7
   3   7   0 5.59781 19.4285   7
  -3  -7   0 20.4606 18.4986   4
   3  -7   1 105.282 21.2090   8
   3   7   1 139.075 35.5806   7
  -3  -7  -1 106.926 17.1575  12
   3   7   1 126.722 26.2652  11
   3  -7   1 90.5813 15.2671  10
   3   7   1 121.394 18.2315  10
   3  -7   1 113.829 20.6322   1
  -3   7  -1 138.947 16.7794   3
  -3  -7  -1 90.7295 14.4643   3
   3   7   2-6.06881 13.5521  11
  -3  -7  -2 11.6616 18.1263   4
  -3  -7  -2 4.85327 8.58686  12
   3  -7   2 17.0547 12.5149   1
  -3   7  -2 2.95570 15.4121  15
  -3  -7  -2 7.53572 7.19011   3
  -3  -7  -3 2398.93 229.651   4
  -3   7  -3 2564.24 217.503   3
   3  -7   3 2161.50 220.994   1
  -3  -7  -3 1762.59 216.595  12
  -3   7  -3 2671.46 226.800  15
   3   7   3 2041.96 222.785  11
  -3  -7  -4 279.402 43.0961   4
   3   7   4 263.032 39.1722  11
  -3  -7  -4 236.195 34.2248  12
  -3  -7  -5 1647.25 192.969  12
   3   7   5 1886.61 196.829  11
   3   7   6 183.906 35.1750  11
  -3   7  -6 231.581 39.8843  15
  -3  -7  -6 153.992 32.2353  12
   3  -7   7 541.789 69.5008   3
   3   7   7 521.878 67.9875  11
  -3  -7  -7 491.722 67.8509  12
  -3   7  -7 666.031 75.2937  15
  -3   7  -8 47.1076 29.9108  15
  -3  -7  -8 10.0573 23.9610   9
   3   7   8 27.8572 21.2577  11
   3  -7   8 3.83179 19.6801   3
   3   7   8 12.5040 23.5003   3
  -3  -7  -8 7.39168 17.9819  12
   3  -7   9 63.2706 30.5870   3
   3   7   9-13.3725 27.1822   3
  -3   7  -9 26.2923 28.1644  13
  -3  -7  -9 5.76848 24.2656  13
   3   7   9 7.10540 19.4549  11
  -3   8  10 630.915 84.1463   3
  -3  -8  10 1028.41 108.818   4
  -3  -8  10 861.466 94.7042   1
   3  -8 -10 620.547 90.7089  12
   3   8 -10 1168.82 104.558  15
  -3  -8   9 6.00297 29.1296   4
   3   8  -9-19.3802 26.6007  15
  -3  -8   9 11.4712 21.5325   1
   3  -8  -9 15.8557 18.8681  12
  -3   8   9 8.79915 14.0549   3
  -3  -8   8 1178.57 125.186   4
  -3  -8   8 1008.35 101.356   3
  -3   8   8 851.326 99.3137   3
  -3  -8   8 1126.48 112.445   1
   3   8  -8 1265.51 112.568  15
   3  -8  -8 688.817 104.758  12
   3  -8  -7 31.4915 18.9138  12
  -3   8   7 29.1869 19.0044  14
  -3  -8   7 36.6853 28.7457   4
  -3  -8   7 86.5307 26.7272   1
  -3   8   7 13.3880 20.2674   8
   3   8  -7 53.2197 22.1122  15
  -3   8   7 40.2917 13.9718   3
  -3  -8   7 45.4005 14.7091   3
  -3   8   6 1227.33 111.084  14
  -3  -8   6 1128.44 126.395   4
  -3  -8   6 1041.73 102.971   3
  -3   8   6 891.560 101.776   3
  -3   8   6 853.252 112.858   8
   3   8  -6 1172.95 111.458  15
  -3  -8   6 1187.46 118.939   1
   3  -8  -6 906.847 110.862  12
   3  -8  -5 15.9640 16.6574  12
  -3  -8   5 17.2304 26.7822   4
  -3  -8   5 8.27866 23.3127   1
  -3   8   5 3.73237 16.6752   8
  -3   8   5 7.01992 13.7472  14
   3   8  -5 2.18678 13.5073  15
  -3  -8   5 2.06517 7.58857   3
  -3   8   5 17.9682 8.20919   3
  -3   8   4 21.3919 14.1804  14
   3  -8  -4 27.7192 15.5584  12
  -3  -8   4 6.43751 6.43448  12
  -3  -8   4-5.51168 20.3499   4
  -3  -8   4 19.6016 13.8507   6
  -3   8   4 19.8359 16.6929   8
   3   8  -4 20.3189 12.3685  15
  -3   8   4 8.62964 7.15967   3
  -3  -8   4 21.0012 7.79165   3
  -3   8   3 35.3976 16.2320  14
  -3  -8   3 30.6625 14.6914   6
  -3  -8   3 14.7562 6.39892  12
  -3   8   3 31.4647 10.0687   5
  -3  -8   3 16.2187 6.17915   5
  -3  -8   3 5.30439 20.8818   4
  -3  -8   3 18.9735 11.4088   2
   3  -8  -3 15.3142 12.6086   1
  -3   8   3 19.5566 13.6665   8
  -3   8   3 15.7248 5.75192   3
  -3  -8   3 18.5863 5.99710   3
   3   8  -3 24.5944 11.3695  15
   3   8  -2 855.255 69.2525  15
   3  -8  -2 1002.36 76.1425   1
  -3  -8   2 876.496 71.7330   2
  -3  -8   2 617.285 62.4997   3
  -3   8   2 490.550 62.1318   3
  -3   8   2 723.713 62.6932   3
  -3  -8   2 844.250 66.3063  12
  -3  -8   2 1002.47 80.4030   6
  -3   8   2 869.282 94.4440   7
  -3  -8   2 708.307 67.4732  14
  -3   8   2 1091.95 81.4450  14
  -3   8   1 67.2313 20.8033  14
  -3  -8   1 62.4557 11.5360  12
   3   8  -1 99.3160 25.4132  11
  -3  -8   1 78.9799 27.9886   4
  -3  -8   1 58.3391 13.2638   2
   3  -8  -1 49.1993 15.4550   1
   3   8  -1 56.4616 11.5255  15
  -3   8   1 61.7979 26.5636   7
  -3  -8   1 80.8439 23.1673   6
   3   8  -1 46.2982 23.4273   7
  -3   8   0 3440.77 219.113  14
  -3  -8   0 2275.86 203.589  12
   3   8   0 2735.64 219.456  11
   3   8   0 2539.82 198.705  10
   3  -8   0 1574.54 198.194  10
  -3   8   0 1874.15 198.764   3
   3   8   0 2198.37 200.316  15
  -3   8   0 2623.05 224.107   7
   3   8   0 2200.27 229.085   7
  -3  -8   0 2399.68 223.285   4
   3  -8   0 2748.18 210.879   1
  -3  -8   0 2539.47 206.175   2
   3  -8   1 2.25375 12.6901   1
   3   8   1 20.4445 24.2624   7
  -3  -8  -1-2.95860 8.21355  12
   3   8   1 13.8005 16.0845  11
   3  -8   1 5.40154 5.18162  10
   3   8   1 3.87819 6.35700  10
   3   8   1 31.0355 29.5298   8
  -3  -8  -1 4.65301 17.1489   4
  -3   8  -1 0.67190 6.14073   3
  -3  -8  -2 1054.52 120.739  12
   3   8   2 1281.65 130.142  11
  -3  -8  -2 1369.51 137.386   4
  -3   8  -2 1209.34 117.773   3
   3   8   2 936.741 138.217   8
   3  -8   2 1249.36 125.565   1
   3   8   2 976.651 142.320   7
  -3   8  -2 1506.45 131.714  15
   3   8   3 38.8931 19.0888  11
  -3  -8  -3 4.40422 19.9710   4
  -3  -8  -3 28.3966 13.1412  12
   3   8   3 33.7139 27.4472   8
  -3   8  -3 67.0957 26.3885  15
   3  -8   3 74.4802 18.7854   1
  -3  -8  -4 75.7085 26.6628   4
  -3   8  -4 131.033 29.8976  15
   3   8   4 63.1738 34.1957   8
  -3  -8  -4 61.1393 18.1560  12
   3   8   4 84.6314 22.5371  11
   3   8   5 109.299 39.8824   8
  -3  -8  -5 120.395 24.6778  12
  -3  -8  -5 115.052 28.3956   4
   3   8   5 84.7551 24.4990  11
  -3  -8  -6 66.4998 25.1443   4
  -3  -8  -6 100.102 25.4477  12
   3   8   6 102.841 25.3400  11
  -3   8  -7-16.2480 27.6001  15
  -3  -8  -7 3.45931 18.9082  12
   3   8   7 9.81056 17.3246  11
  -3  -8  -8 772.335 95.7727  12
   3   8   8 767.989 93.9915  11
  -3  -8  -8 644.342 99.8287   9
  -3  -9  10-6.18677 32.7783   4
  -3  -9   9-6.38839 30.3916   4
   3   9  -9 4.07334 27.1298  15
  -3   9   9-5.14158 26.7951   8
   3  -9  -9 12.2877 19.4868  12
  -3  -9   9 4.18842 25.5178   1
  -3  -9   8 107.622 32.9359   1
  -3  -9   8 32.6773 32.6610   4
   3   9  -8 86.1552 29.0353  15
  -3   9   8 72.6450 27.2193   8
   3  -9  -8 96.0732 26.5172  12
  -3   9   8 90.7773 23.1777  14
  -3  -9   7 169.329 39.3596   1
  -3  -9   7 136.083 42.8893   4
   3   9  -7 134.641 31.3606  15
  -3   9   7 121.781 33.8083   8
   3  -9  -7 156.311 31.6908  12
  -3   9   7 122.119 25.9088  14
  -3  -9   6 155.589 38.8176   1
  -3  -9   6 110.083 37.6821   4
  -3   9   6 114.301 30.9316   8
  -3   9   6 122.455 25.2284  14
   3   9  -6 125.859 28.6462  15
   3  -9  -6 105.621 27.9320  12
  -3  -9   5 1312.52 128.258   1
  -3  -9   5 1266.90 135.252   4
   3   9  -5 1046.81 113.675  15
  -3   9   5 1241.97 123.000   8
  -3   9   5 1105.96 113.759  14
  -3  -9   5 1024.48 114.004   6
   3  -9  -5 837.025 114.853  12
   3  -9  -4 149.073 32.0758  12
  -3  -9   4 287.942 52.2698   4
   3   9  -4 176.375 29.3763  15
  -3   9   4 226.571 36.7101   8
  -3   9   4 228.754 33.1469  14
  -3  -9   4 213.569 31.3152   2
  -3  -9   4 192.477 31.4769   6
   3  -9  -3 724.826 87.1951  12
  -3  -9   3 728.466 81.2609   2
  -3  -9   3 864.112 102.503   4
   3   9  -3 754.458 80.2944  15
  -3   9   3 698.767 85.6771   8
  -3   9   3 856.383 85.9561  14
  -3  -9   3 676.689 84.0394   6
   3  -9  -3 845.571 84.0124   1
   3  -9  -2 458.349 51.8788   1
   3   9  -2 408.516 46.5763  15
  -3   9   2 459.999 54.5406  14
  -3  -9   2 389.312 47.6014   2
  -3  -9   2 445.618 55.0552   6
  -3   9   2 369.750 64.6966   7
  -3  -9   1 521.988 55.9280   2
  -3  -9   1 641.699 78.1675   4
   3   9  -1 506.757 74.0756   8
   3   9  -1 445.415 74.1871   7
  -3   9   1 551.309 74.7057   7
  -3  -9   1 449.217 53.2350  12
   3  -9  -1 552.462 60.3071   1
  -3   9   1 574.709 63.3362  14
  -3  -9   0 2.71968 9.14894  12
  -3  -9   0-5.37463 22.8686   4
   3   9   0 1.38152 7.04844  15
   3   9   0 5.94678 22.6318   8
   3   9   0 7.60027 18.7871  11
  -3   9   0 9.93602 21.1385   7
   3   9   0-6.96356 24.7897   7
   3  -9   0-4.88314 15.9257   1
  -3  -9  -1 46.4844 14.2147  12
  -3  -9  -1 83.5224 31.3843   4
  -3   9  -1 65.8403 23.4084  15
   3   9   1 38.3655 28.2877   8
   3   9   1 36.9597 22.2003  11
   3   9   1 65.2812 34.1464   7
   3  -9   1 48.5210 18.1645   1
  -3  -9  -2-1.87025 12.2100  12
  -3  -9  -2 10.1479 22.1284   4
  -3   9  -2-3.19667 20.1809  15
   3   9   2 6.80399 28.9548   8
   3   9   2 14.4477 17.5303  11
   3   9   2 15.5894 29.6687   7
   3  -9   2 18.7396 16.3172   1
  -3  -9  -3 466.506 62.2801  12
  -3  -9  -3 644.086 79.2466   4
  -3   9  -3 779.386 74.8480  15
   3   9   3 614.295 87.5364   8
   3   9   3 523.971 69.5152  11
   3   9   3 516.250 88.5079   7
   3  -9   3 550.389 67.3590   1
  -3  -9  -4 431.469 58.7010   4
   3   9   4 339.111 66.4108   8
  -3   9  -4 428.114 55.9979  15
  -3  -9  -4 290.497 44.5001  12
   3   9   4 359.545 50.8288  11
  -3  -9  -5 1075.76 110.488   4
  -3   9  -5 1191.18 110.005  15
   3   9   5 872.365 120.161   8
   3   9   5 836.822 101.002  11
  -3  -9  -5 769.065 98.4172  12
  -3   9  -6 185.452 39.4390  15
   3   9   6 198.391 50.3542   8
  -3  -9  -6 137.259 30.5942  12
   3   9   6 143.332 32.1544  11
   3   9   7 234.501 59.3485   8
   3   9   7 313.514 44.0255  11
  -3  -9  -7 267.044 43.6866  12
  -3  10   9 230.765 50.2664   8
   3  10  -9 398.608 58.0274  15
  -3 -10   9 298.429 64.2390   4
  -3 -10   8 96.5698 44.4201   4
   3  10  -8 177.668 39.6753  15
  -3  10   8 168.687 37.4806   8
  -3 -10   8 148.603 39.3725   1
   3 -10  -8 102.781 29.9967  12
   3 -10  -7 287.765 51.3521  12
  -3  10   7 342.439 46.1046  14
  -3 -10   7 441.446 72.6771   4
   3  10  -7 469.345 57.2777  15
  -3  10   7 302.719 55.1615   8
  -3 -10   7 496.276 63.3368   1
  -3 -10   7 400.130 51.3928   6
   3 -10  -6 152.157 32.5930  12
  -3  10   6 136.037 27.8463  14
  -3 -10   6 246.615 52.7205   4
   3  10  -6 159.735 32.7191  15
  -3  10   6 197.525 38.5030   8
  -3 -10   6 220.222 43.7169   1
  -3 -10   6 133.115 29.7350   6
   3 -10  -5 38.1358 19.0339  12
  -3  10   5 53.2298 18.4434  14
  -3 -10   5 60.2302 35.2311   4
   3  10  -5 72.0512 22.9762  15
  -3  10   5 53.9386 23.1431   8
  -3 -10   5 49.3452 21.2698   2
  -3 -10   5 54.6244 19.5676   6
   3 -10  -4 13.4561 16.6162  12
  -3  10   4 31.0941 17.1635  14
  -3 -10   4 52.9855 37.4105   4
   3  10  -4 34.1968 16.9354  15
  -3  10   4 45.6866 21.1134   8
  -3 -10   4 17.0084 15.3380   6
  -3 -10   4 63.6083 18.8534   2
   3 -10  -4 39.1686 20.0947   1
  -3  10   3 4.98117 17.4295  14
  -3 -10   3 6.45075 29.4436   4
  -3 -10   3 5.80457 15.8806   6
  -3  10   3 7.24400 29.2506   7
   3 -10  -3 9.59409 16.1541   1
  -3 -10   3 5.82961 12.4255   2
   3 -10  -3 6.58469 16.5926  12
   3  10  -3 16.1214 15.0707  15
  -3  10   2 202.552 33.8809  14
   3  10  -2 221.883 29.2746  15
   3 -10  -2 223.970 34.3959   1
  -3 -10   2 184.322 35.8916   6
  -3  10   2 217.819 48.4546   7
  -3 -10   2 228.045 29.5702   2
   3  10  -1 604.839 62.8827  15
   3  10  -1 503.891 84.8857   7
  -3  10   1 632.304 86.6132   7
  -3 -10   1 557.208 83.6053   4
   3 -10  -1 646.361 70.7557   1
  -3 -10   0 488.938 69.8114   4
  -3  10   0 550.489 59.8566  15
   3  10   0 483.077 71.5092   8
  -3  10   0 317.989 61.9823   7
   3  10   0 334.090 68.5579   7
   3 -10   0 394.361 53.1510   1
   3 -10   1 405.408 53.2572   1
  -3 -10  -1 381.470 64.5378   4
  -3  10  -1 472.960 57.1382  15
   3  10   1 350.180 63.5339   8
   3  10   1 420.615 76.2096   7
   3  10   1 424.781 58.3138  11
   3  10   2 231.427 41.2380  11
   3 -10   2 263.357 38.8709   1
  -3 -10  -2 238.388 49.8396   4
  -3  10  -2 325.921 44.3437  15
   3  10   2 366.113 60.8615   8
  -3 -10  -2 162.745 30.3968  12
   3  10   2 209.922 53.7022   7
   3  10   3 306.817 46.0205  11
   3 -10   3 261.675 42.6199   1
  -3 -10  -3 257.137 51.8965   4
  -3  10  -3 356.180 48.7923  15
   3  10   3 238.232 56.6197   8
  -3 -10  -3 226.753 36.3986  12
   3  10   3 363.191 69.6836   7
   3  10   4 7.05392 19.0649  11
   3 -10   4 22.8286 21.5699   1
  -3 -10  -4 43.5633 26.5144   4
  -3  10  -4 3.78773 26.2953  15
   3  10   4 51.8247 38.6216   8
  -3 -10  -4 15.1792 15.1357  12
   3  10   4 26.2465 36.3260   7
  -3 -10  -5 115.872 32.2785   4
  -3  10  -5 83.7130 31.6046  15
   3  10   5 7.52537 32.5630   8
   3  10   5 60.8113 24.7723  11
  -3 -10  -5 54.9642 21.6075  12
   3  10   6 9.85443 20.7589  11
  -3 -10  -6 12.9274 19.4773  12
  -3 -10  -7 95.2390 27.7149  12
   3  11  -8 3.91245 27.6084  15
  -3  11   7 4.48420 22.9781   8
   3  11  -7 30.9205 29.2387  15
   3 -11  -7 3.79361 20.7374  12
  -3 -11   7-21.5237 39.2143   4
  -3 -11   6 206.957 55.7721   4
   3  11  -6 177.846 35.9664  15
  -3  11   6 178.572 39.7302   8
   3 -11  -6 154.783 34.7581  12
  -3 -11   6 210.732 35.0554   2
  -3 -11   5 216.525 32.7767   2
  -3 -11   5 134.119 46.0505   4
   3  11  -5 219.632 35.3179  15
  -3  11   5 158.497 35.2255   8
   3 -11  -5 103.055 29.8206  12
  -3  11   5 142.452 28.3546  14
  -3 -11   4 627.992 88.8214   4
   3 -11  -4 530.269 70.6562  12
   3  11  -4 569.716 66.4302  15
  -3  11   4 628.585 67.6735  14
  -3 -11   4 560.876 81.6515   1
   3 -11  -4 617.974 68.5557   1
  -3  11   4 394.766 82.9552   7
  -3  11   3 14.7405 34.3992   7
   3 -11  -3 20.3050 18.4776   1
   3  11  -3 26.3510 15.7137  15
   3 -11  -3 10.0551 16.9685  12
  -3 -11   2 582.454 84.4734   4
  -3  11   2 539.584 82.3748   7
   3 -11  -2 530.227 62.9848   1
   3 -11  -2 457.184 65.5942  12
  -3 -11   1 57.2016 34.3183   4
  -3  11   1 40.1767 23.1717  15
   3 -11  -1 5.50759 19.6261   1
   3  11  -1 51.8938 35.3744   7
  -3  11   1 44.9553 33.5809   7
  -3 -11   0-12.3550 30.5421   4
  -3  11   0 11.5984 25.8820   7
   3  11   0 54.5057 37.7767   7
  -3  11   0-11.9586 21.8515  15
   3 -11   0 8.70647 19.1336   1
  -3 -11  -1 5.96304 26.0270   4
   3  11   1 8.24255 33.2936   7
   3  11   1 19.9052 29.6344   8
  -3  11  -1 28.4415 22.7322  15
   3 -11   1 2.97297 20.6280   1
   3 -11   2 153.519 34.2312   1
  -3 -11  -2 131.514 41.7053   4
   3  11   2 108.882 48.8766   7
   3  11   2 212.613 48.5686   8
  -3  11  -2 220.209 39.4814  15
   3  11   2 142.098 34.3200  11
   3 -11   3 39.3120 24.0334   1
  -3 -11  -3 37.6930 30.5413   4
   3  11   3 50.1343 36.8874   8
   3  11   3 8.56933 35.7368   7
  -3  11  -3 80.7801 31.0817  15
   3  11   3 29.4615 23.0166  11
  -3 -11  -4 557.530 74.6959   4
  -3  11  -4 631.290 72.1958  15
   3  11   4 423.707 79.2835   8
   3  11   4 494.862 87.7380   7
   3  11   4 401.858 64.5362  11
   3  12  -7 318.310 53.9434  15
   3  12  -6 49.7919 26.7340  15
   3 -12  -5 18.0248 20.6494  12
  -3 -12   4-10.8916 33.1768   1
  -3  12   4 31.6102 43.8413   7
  -3 -12   4 35.9405 37.4587   4
   3 -12  -4-13.8779 20.0796  12
   3 -12  -3 23.7834 23.3282  12
  -3  12   3-7.45173 36.8505   7
  -3 -12   2 20.6052 33.3674   4
  -3  12   2 7.82545 21.5648  15
   3 -12  -2 44.0300 23.1902   1
  -3  12   2 7.19914 32.1748   7
   3 -12  -2 13.2631 20.5205  12
  -3  12   1 471.692 55.2335  15
   3 -12  -1 321.016 54.0900  12
  -3  12   1 302.948 66.2748   7
  -3 -12   1 460.624 74.8662   4
   3 -12  -1 407.587 54.2450   1
  -3 -12   0-19.2514 31.7326   4
   3 -12   0 15.0700 20.8886   1
   3  12   0 24.1050 35.8639   7
  -3  12   0 8.80651 24.5181  15
  -3 -12  -1 105.074 40.2462   4
   3 -12   1 100.370 28.7822   1
   3  12   1 120.434 41.4618   8
   3  12   1 117.568 46.9551   7
  -3  12  -1 96.6016 30.5534  15
  -3 -12  -2 5.88496 29.1057   4
  -3  12  -2-6.92212 26.9668  15
   3  12   2 20.6244 30.6907   8
   3 -12   2 19.8001 24.3344   1
  -3 -12  -3 386.698 64.7357   4
  -3  12  -3 379.948 56.0795  15
   3 -12   3 279.269 50.3428   1
   3 -13  -2 131.953 31.9765  12
  -3  13   1-2.67848 23.4967  15
   3 -13  -1 9.73585 22.4803  12
  -3  13   0-8.75056 24.9767  15
   3 -13   0 9.20494 22.0403   1
  -3  13  -1 18.9739 26.5957  15
   3 -13   1 6.44016 23.1571   1
  -4   0  14 492.632 67.4985   2
   4   0 -13-3.17359 17.3488   9
  -4   0  13-4.49867 20.9712   3
  -4   0  12 60.2378 25.3043   3
   4   0 -12 56.7901 20.4188  12
   4   0 -12 14.2179 17.0505   9
  -4   0  11-3.76319 15.6104   3
   4   0 -11 2.49867 13.2408   9
   4   0 -11 13.4238 15.3300  12
   4   0 -10 2463.69 242.507  12
   4   0 -10 2961.56 243.963   9
   4   0  -9 1.97506 9.58673  12
  -4   0   9 6.00675 13.7075   3
   4   0  -8 5007.11 463.000  12
  -4   0   8 4471.80 466.474   3
  -4   0   8 4838.78 464.189  11
   4   0  -7 9.04701 7.86934  12
  -4   0   7 1.88531 8.61315   2
  -4   0   7 2.40959 9.46215   3
  -4   0   6 2983.97 316.935   1
  -4   0   6 2936.07 323.618   3
  -4   0   6 3767.42 323.307   2
  -4   0   6 4151.54 322.841  11
   4   0  -6 3414.80 320.649  12
   4   0  -5 4.45063 5.09586  10
   4   0  -5 3.59936 5.59830  12
  -4   0   5-1.22434 5.83019  11
  -4   0   5 2.95035 7.56268  13
  -4   0   5 3.11926 3.94581   1
  -4   0   4 21.0784 7.65755  11
   4   0  -4 20.0492 7.07787  10
   4   0  -4 12.8961 6.80963  12
   4   0  -4 5.09026 5.68902  11
   4   0  -3-1.38466 5.74242  11
   4   0  -3-1.50891 5.91922  10
   4   0  -3 1.74393 4.38993   9
  -4   0   3-0.98504 4.19130   8
  -4   0   3 3.21717 5.92743   6
   4   0  -3 3.91468 6.45108   2
   4   0  -2 1943.84 218.007  10
   4   0  -2 2415.38 215.430   9
  -4   0   2 2142.50 220.351   6
   4   0  -2 2518.70 221.113  11
   4   0  -2 2106.56 217.252   2
   4   0  -1 6.08057 5.79849   6
  -4   0   1 5.46745 3.69914   7
   4   0  -1 2.58654 3.95353   9
   4   0  -1 4.68055 7.12970   8
  -4   0   1-1.24522 4.28959   9
   4   0  -1 21.3259 8.63048   2
  -4   0   0 18049.6 1434.50  14
   4   0   0 15516.3 1431.19   9
  -4   0   0 13520.5 1432.41   9
   4   0   0 12844.1 1437.86   6
  -4   0  -1 9.38893 6.15287   9
  -4   0  -1 5.07666 6.51621  14
   4   0   1-2.80267 10.3359   5
  -4   0  -2 3204.08 318.921   9
   4   0   2 3757.08 317.874   9
   4   0   2 3487.67 319.250  14
   4   0   3 20.0579 11.4722   3
  -4   0  -3 4.24790 8.33798   9
   4   0   3 7.84556 7.47127  14
  -4   0  -3-3.36229 6.83524  15
  -4   0  -4 1167.48 128.078   9
   4   0   4 1115.61 132.504   3
   4   0   4 1164.39 124.238  14
  -4   0  -4 1375.12 123.261  15
  -4   0  -5-2.83991 10.4646   9
  -4   0  -5-1.30180 8.66990  15
   4   0   5 11.8874 15.5440   3
   4   0   6 785.478 108.509   3
  -4   0  -6 1018.39 98.7074  15
  -4   0  -6 954.747 102.033   4
  -4   0  -6 1021.45 107.677   9
   4   0   7 9.35863 19.9217   3
  -4   0  -7 6.50709 11.0743  15
  -4   0  -8 1418.05 137.683  15
   4   0   8 1196.22 150.655   3
  -4   0  -9 9.26886 20.7024   9
  -4   0  -9 12.5695 17.0550  15
   4   0   9 5.60760 26.6922   3
  -4   0 -10 2707.59 253.041   9
   4   0  10 2067.24 251.712   3
   4  -1 -14 252.042 44.7707   9
  -4   1  14 284.668 44.3943   2
   4  -1 -13 1514.88 148.487   9
   4   1 -13 1487.02 144.991   9
   4  -1 -13 1294.13 146.457  12
  -4   1  13 1732.11 148.847   2
   4   1 -12 322.003 40.6208   9
   4  -1 -12 279.544 42.4255  12
   4  -1 -12 261.299 41.8791   9
  -4  -1  12 176.482 41.9724   3
  -4   1  12 387.645 44.7230   2
   4   1 -11 2265.40 200.298   9
   4  -1 -11 2087.90 202.785   9
   4  -1 -11 1926.00 201.845  12
   4   1 -11 2079.98 200.389  12
  -4  -1  11 1512.55 202.561   3
  -4   1  11 1990.97 200.901   2
   4   1 -10 214.000 26.6316   9
  -4   1  10 175.413 28.4131   2
   4  -1 -10 148.907 27.2454  12
   4   1 -10 151.977 26.1817  12
  -4  -1  10 180.309 27.5404   4
  -4  -1  10 139.644 30.8387   3
  -4  -1   9 412.973 40.9545   4
   4   1  -9 379.406 37.4815   9
  -4  -1   9 264.062 41.0182   3
  -4   1   9 371.230 39.9712   2
   4   1  -9 338.603 37.6430  12
   4  -1  -9 342.876 40.1943  12
  -4  -1   8 13.4745 12.8863   3
   4  -1  -8 10.1243 10.0953  12
   4   1  -8 14.7025 7.51631  12
  -4   1   8 9.55127 10.6777   2
   4   1  -8 17.8273 8.23145   9
  -4  -1   7 313.649 38.8958  11
  -4   1   7 270.555 34.7152  11
   4   1  -7 319.804 34.0547   9
   4   1  -7 328.370 35.1492  12
  -4  -1   7 338.682 36.8331  12
   4  -1  -7 302.428 37.2208  12
  -4  -1   7 294.567 33.8601   1
  -4  -1   7 246.171 38.4095   3
  -4   1   7 303.067 36.9822   2
  -4   1   6 287.260 35.7064   2
  -4  -1   6 283.501 33.4072   1
   4   1  -6 330.820 34.1516  12
   4  -1  -6 328.833 37.0838  12
  -4  -1   6 273.167 38.2819   3
  -4   1   6 308.918 34.1242  11
  -4  -1   5 11534.5 891.638  10
   4  -1  -5 8866.52 889.517  10
   4  -1  -5 9621.69 890.705  12
   4   1  -5 9488.16 886.922  12
  -4  -1   5 8865.52 888.103   1
  -4  -1   5 10470.8 891.204  11
  -4   1   5 10411.5 887.769  11
  -4  -1   5 7903.56 887.892  15
  -4  -1   5 7879.93 888.992  13
   4  -1  -4 1864.33 213.217  11
   4   1  -4 1806.38 216.781  11
  -4  -1   4 2819.96 219.271  11
   4  -1  -4 2504.71 216.899  10
  -4   1   4 2147.59 210.794   1
  -4   1   4 2500.06 217.406   2
   4  -1  -4 2180.76 215.900   2
   4   1  -4 2653.34 214.225  12
  -4  -1   3 9298.18 744.679  11
   4   1  -3 8009.51 743.744  11
   4  -1  -3 7213.30 739.845  11
   4  -1  -3 7412.34 741.503  10
  -4  -1   3 8519.91 742.946  10
   4   1  -3 8005.02 736.831   9
  -4  -1   3 8644.57 742.629   8
  -4   1   3 7570.52 742.864   2
  -4   1   3 8142.89 742.376   6
   4  -1  -3 6774.68 740.324   2
   4   1  -3 6773.23 740.399   2
   4   1  -2 177.943 25.9320  11
   4  -1  -2 145.654 22.6517  10
   4   1  -2 167.894 19.1745   9
   4  -1  -2 195.844 23.2239   9
  -4  -1   2 171.560 20.7567   9
   4  -1  -2 172.672 24.1411   2
  -4   1   2 223.628 26.7661   6
   4   1  -2 182.499 23.1759   8
  -4  -1   2 223.019 26.5564   8
   4   1  -1 3431.60 409.902   6
   4  -1  -1 3656.12 409.330   6
   4  -1  -1 3791.83 405.495   8
   4   1  -1 3872.04 411.064   8
  -4   1   1 4239.07 409.158   9
   4  -1  -1 5076.42 408.586   9
  -4  -1   1 4573.72 406.584   9
   4   1  -1 4744.48 404.942   9
  -4   1   0 157.797 22.5836   9
   4  -1   0 152.031 20.9483   9
  -4  -1   0 152.474 20.3620   9
   4   1   0 134.286 18.9950   9
   4  -1   0 170.144 32.7689   6
   4   1   0 178.423 34.7943   6
  -4  -1   0 181.267 22.1345  14
  -4   1   0 133.625 22.0569  14
   4   1   0 186.955 20.1317   7
   4   1   1 770.723 73.7654  12
   4   1   1 630.237 84.0853   6
  -4   1  -1 827.106 77.9363  14
  -4  -1  -1 697.385 73.6455  14
  -4   1  -1 730.747 78.1749   9
  -4  -1  -1 697.532 75.8427   9
   4  -1   2 92.1062 24.1792   5
  -4   1  -2 171.472 23.9603   9
  -4  -1  -2 156.716 22.0282   9
   4   1   2 160.794 19.7389  12
  -4  -1  -2 178.212 24.5951   3
   4  -1   2 131.938 22.3548  14
   4  -1   3 2277.43 275.650   3
  -4   1  -3 2768.98 273.509   9
  -4  -1  -3 2597.49 271.875   9
  -4   1  -3 2935.69 270.108  15
  -4  -1  -3 3058.51 267.016  15
   4   1   3 2852.45 269.438  14
   4  -1   3 2486.69 270.184  14
   4  -1   4 733.419 94.3278   3
  -4   1  -4 787.997 91.5699   9
  -4  -1  -4 828.876 91.0762   9
  -4  -1  -4 905.128 84.4338  15
  -4   1  -4 940.780 88.0157  15
   4   1   4 760.296 86.0547  14
   4  -1   5 6311.22 686.022   3
  -4  -1  -5 6789.49 681.707   9
  -4   1  -5 7319.64 676.739  15
  -4  -1  -5 7513.11 673.896  15
   4   1   5 6717.54 675.880  14
  -4  -1  -6 624.705 77.7649   9
  -4   1  -6 692.640 72.1362  15
  -4  -1  -6 696.798 69.4431  15
   4  -1   6 634.080 81.6445   3
  -4   1  -6 620.600 75.2583   4
   4  -1   7 848.358 119.271   3
  -4  -1  -7 1029.16 117.540   9
  -4   1  -7 1160.07 110.394  15
  -4  -1  -7 1073.83 107.198  15
  -4   1  -8 83.6197 25.4513   9
   4  -1   8 56.4118 26.5533   3
  -4  -1  -8 92.4499 18.8648  15
  -4   1  -8 88.0085 21.5345  15
  -4   1  -9-4.71620 22.8823   9
   4  -1   9 5.56792 23.0935   3
  -4   1  -9 9.20624 17.1059  15
  -4   1 -10 26.0814 27.7065   9
  -4  -1 -10 31.0877 24.2350   9
   4  -1  10 30.3138 28.9124   3
   4   1  10-6.07863 28.4050   3
  -4   1 -10 23.2155 20.6332  15
   4  -2 -14 164.030 37.5425   9
  -4   2  13 52.0320 26.4112   3
  -4  -2  13 68.7556 29.0452   3
   4  -2 -13 145.982 31.7855   9
  -4   2  13 153.830 27.0608   2
   4  -2 -13 128.504 31.0910  12
  -4   2  12 38.1384 20.8628   3
  -4  -2  12 40.2496 21.9817   3
   4  -2 -12 38.2239 21.9984  12
   4  -2 -12 39.8233 21.2815   9
   4   2 -12 47.3542 17.5572   9
  -4   2  12 32.3746 17.8068   2
   4   2 -11 220.762 28.3310   9
  -4   2  11 204.286 29.4315   2
  -4  -2  11 136.344 32.2425   3
  -4   2  11 140.187 31.5811   3
   4  -2 -11 132.937 29.4303  12
   4   2 -10 1150.90 104.398   9
   4  -2 -10 1040.61 109.047  12
  -4  -2  10 823.993 108.776   3
  -4   2  10 864.248 108.571   3
  -4   2  10 1055.07 105.810   2
  -4  -2  10 1003.06 108.459   4
   4   2  -9 2358.37 213.542   9
   4   2  -9 2172.56 214.107  12
   4  -2  -9 2260.86 219.446  12
  -4  -2   9 1842.41 219.089   3
  -4   2   9 1892.55 218.582   3
  -4   2   9 2090.09 215.221   2
  -4  -2   9 2687.73 222.841   4
  -4  -2   8 2439.49 172.714  12
   4  -2  -8 2066.87 175.700  12
   4   2  -8 2124.75 170.157  12
  -4  -2   8 2523.93 178.832   4
   4   2  -8 2123.88 168.479   9
  -4   2   8 2126.69 172.256   2
  -4  -2   8 1993.27 170.587   1
  -4  -2   8 1574.56 174.293   3
  -4   2   8 1796.75 175.144   3
  -4   2   7 2355.65 298.334  11
   4   2  -7 3537.75 299.194   9
  -4   2   7 3446.93 302.952   2
   4   2  -7 3215.09 300.329  12
  -4  -2   7 3636.58 302.306  12
   4  -2  -7 3500.18 306.488  12
  -4  -2   7 2781.55 305.712   3
  -4   2   7 2964.14 305.644   3
  -4  -2   7 3185.76 302.144   1
  -4  -2   6 2434.82 237.029   1
   4   2  -6 2796.87 232.325   9
  -4  -2   6 3263.72 242.969  11
  -4   2   6 1835.95 231.959  11
   4  -2  -6 2430.19 239.381  12
   4   2  -6 2656.74 233.840  12
  -4  -2   6 2339.91 240.208   3
  -4   2   6 2519.88 240.152   3
  -4  -2   5 752.260 80.6258  13
  -4   2   5 611.612 79.1693  13
   4   2  -5 829.636 76.5229  12
   4  -2  -5 774.709 82.6989  12
  -4  -2   5 672.424 78.2108  15
   4  -2  -5 750.396 80.2078  10
  -4   2   5 1006.34 82.6429  10
  -4  -2   5 958.882 81.7446  10
   4   2  -5 750.910 80.6824  10
   4  -2  -4 80.7110 12.7932  10
   4   2  -4 76.7200 12.9294  10
  -4  -2   4 59.4124 12.6239  10
   4  -2  -4 56.0752 12.1734   2
  -4   2   4 67.8421 13.9416   2
   4   2  -4 80.5499 15.4729  11
  -4  -2   4 69.6269 11.9690  15
   4   2  -4 72.3298 8.73347  12
   4   2  -3 166.881 16.3004  12
  -4  -2   3 208.694 25.2591  11
   4  -2  -3 157.020 18.4786  11
   4   2  -3 122.799 22.7986  11
   4   2  -3 167.682 21.5220  10
   4  -2  -3 177.368 21.2587  10
  -4  -2   3 145.532 20.7937  10
  -4   2   3 168.536 22.8319  10
  -4   2   3 126.960 20.0707   6
  -4  -2   3 178.586 24.0303   8
   4  -2  -3 119.512 19.7907   2
  -4  -2   3 112.185 18.1247  15
   4   2  -2 314.975 39.6810  11
   4   2  -2 308.350 37.2669  10
   4  -2  -2 296.706 36.4069  10
   4  -2  -2 352.871 38.8599   9
  -4  -2   2 312.783 32.9799   9
  -4   2   2 283.207 31.5008   1
   4  -2  -2 292.488 38.9341   2
  -4  -2   2 374.713 37.5903   7
   4   2  -2 291.081 38.8857   8
  -4  -2   2 413.321 42.7960   8
  -4   2   2 430.105 42.0812   6
  -4  -2   2 392.404 39.1936   2
   4   2  -2 326.947 36.2981   2
   4   2  -1 5303.19 478.299  12
   4   2  -1 5769.17 489.805  11
   4   2  -1 5245.60 482.497   2
  -4   2   1 4719.71 478.383   1
   4  -2  -1 6508.67 486.359   9
  -4  -2   1 4969.77 480.009   9
   4   2  -1 4402.33 488.397   8
   4  -2  -1 4046.91 482.693   6
   4   2   0 7082.29 714.381   2
  -4  -2   0 8636.42 722.254   5
  -4  -2   0 7375.65 712.587   9
  -4   2   0 7653.42 717.229   9
  -4  -2   0 6810.08 711.918  14
  -4   2   0 10057.0 720.328  14
  -4  -2   0 8293.93 717.593   3
  -4   2   0 6940.56 717.632   3
   4   2   0 7958.86 710.594  12
   4  -2   0 5703.62 717.419   6
   4   2   0 6954.51 715.166   7
  -4  -2  -1 6435.92 497.642   3
   4   2   1 5200.46 495.255   2
  -4   2  -1 5155.16 490.606   1
  -4   2  -1 5348.98 496.728   9
  -4  -2  -1 5311.09 493.444   9
  -4   2  -1 5695.79 496.503  14
  -4  -2  -1 5330.98 488.961  14
   4   2   1 5508.71 490.331  12
   4  -2   2 2060.99 206.335  14
  -4   2  -2 1883.61 201.183   1
  -4   2  -2 1992.83 207.176   9
  -4  -2  -2 1904.94 204.210   9
  -4  -2  -2 2595.32 207.994   3
  -4   2  -2 2578.98 209.748   3
   4  -2   2 2352.76 200.029   7
  -4  -2  -2 2020.19 198.571  15
   4  -2   2 1748.39 208.564   5
   4   2   2 1610.56 208.963   5
  -4  -2  -3 1184.27 135.327   9
  -4   2  -3 1382.86 138.807   9
   4   2   3 1538.51 133.595  14
  -4  -2  -3 1312.35 128.817  15
  -4   2  -3 1468.58 136.198  15
   4  -2   3 1071.59 138.616   3
  -4  -2  -4 1003.49 115.136   9
   4   2   4 852.406 118.603   3
   4  -2   4 1021.25 119.459   3
   4   2   4 1133.48 109.915  14
  -4  -2  -4 1129.63 107.197  15
  -4   2  -4 1236.79 113.979  15
   4   2   5 16.0221 9.65629  14
  -4   2  -5 29.0874 15.4626   4
  -4  -2  -5 55.1836 17.0839   9
   4   2   5 36.5636 19.5663   3
   4  -2   5 23.0588 17.4201   3
  -4  -2  -5 45.3720 9.39056  15
  -4   2  -5 29.0218 13.9893  15
  -4   2  -6 1070.56 112.247   4
  -4  -2  -6 1037.52 111.986   9
   4   2   6 865.454 102.093  14
  -4   2  -6 1212.01 107.559  15
  -4  -2  -6 1056.48 100.863  15
   4   2   6 949.454 115.364   3
   4  -2   6 900.227 113.965   3
   4   2   7 935.454 110.628   3
   4  -2   7 819.268 107.332   3
  -4   2  -7 1052.28 99.5473  15
  -4  -2  -7 894.899 93.3659  15
  -4  -2  -7 846.581 103.945   9
  -4   2  -7 983.745 106.921   9
   4   2   8 591.215 79.1433   3
   4  -2   8 468.973 74.6269   3
  -4   2  -8 702.521 69.0442  15
  -4   2  -8 580.264 75.1294   9
  -4  -2  -8 499.010 71.9006   9
   4   2   9 1042.43 131.374   3
   4  -2   9 944.469 128.792   3
  -4   2  -9 1270.66 120.676  15
  -4   2  -9 1119.01 130.005   9
   4   2  10 970.122 130.359   3
   4  -2  10 1006.92 131.724   3
  -4   2 -10 1062.81 129.642   9
  -4   2 -10 1237.29 120.284  15
   4  -3 -14 654.717 85.3398   9
   4  -3 -13 177.993 36.7537   9
  -4   3  13 79.8523 30.3987   3
  -4  -3  13 132.065 34.4836   3
   4  -3 -13 166.197 35.5828  12
  -4   3  12 1268.03 149.719   3
  -4  -3  12 1316.94 151.569   3
  -4   3  12 1592.63 145.145   2
   4  -3 -12 1381.76 151.280  12
  -4   3  11 284.570 35.5769   2
  -4   3  11 259.677 41.5394   3
  -4  -3  11 190.160 39.8241   3
   4  -3 -11 251.098 40.1152  12
   4   3 -11 317.661 37.3862   9
   4   3 -10 1386.50 131.817   9
  -4   3  10 1299.84 131.852   2
  -4  -3  10 1158.51 138.287   3
  -4   3  10 1158.89 137.087   3
   4  -3 -10 1226.37 137.606  12
  -4  -3  10 1621.83 143.227   4
  -4   3   9 5.50814 8.89366  11
   4   3  -9-2.62589 7.99868   9
  -4  -3   9-3.44631 16.7192   4
  -4  -3   9-6.05559 14.6889   3
  -4   3   9 5.62709 12.8379   3
   4  -3  -9 5.73741 14.6981  12
  -4   3   9 1.60734 8.51467   2
  -4  -3   9-3.76185 10.1233   1
   4  -3  -9-4.62637 8.80338   1
  -4  -3   8 6.03484 12.5316   4
   4   3  -8 5.08866 7.14691   9
   4  -3  -8 10.4529 10.8581  12
  -4   3   8 8.79475 6.03560  11
  -4  -3   8 1.36733 8.84856  12
  -4  -3   8 7.99561 12.1794   3
  -4   3   8 12.3672 10.8049   3
  -4   3   8 27.6371 9.71056   2
  -4  -3   8 5.48768 10.0200   1
   4  -3  -8-0.86279 6.90049   1
   4   3  -7 67.2165 10.4718   9
   4  -3  -7 58.5756 16.2849  12
  -4  -3   7 76.4204 13.0289  12
  -4  -3   7 48.8503 14.5356   1
  -4  -3   7 62.1385 15.9964   3
  -4   3   7 77.3169 16.9145   3
   4  -3  -6 2016.92 226.519  12
  -4  -3   6 2505.27 221.162  12
  -4  -3   6 2491.70 227.002   1
  -4  -3   6 2094.14 226.259   3
  -4   3   6 2120.21 225.508   3
  -4  -3   5 1695.92 154.540   2
  -4  -3   5 1847.92 152.176  10
  -4   3   5 1776.90 152.545  10
  -4  -3   5 1340.54 150.627  13
  -4   3   5 1401.03 150.354  13
  -4   3   5 1488.09 151.239   2
   4  -3  -5 1230.47 153.012  12
   4   3  -4 6647.54 645.096  10
   4  -3  -4 7041.17 644.744  10
  -4  -3   4 7864.25 646.392  10
  -4  -3   4 6357.13 642.483  15
  -4  -3   4 8010.28 650.814   8
   4   3  -4 6952.22 651.786  11
  -4  -3   4 8238.54 651.365  11
  -4  -3   4 5674.22 644.510  13
  -4   3   4 6195.28 644.394  13
  -4  -3   4 7470.88 648.455   2
   4  -3  -4 6194.84 644.482   2
  -4  -3   3 1452.26 120.784  11
   4   3  -3 1195.55 119.879  11
  -4  -3   3 1207.11 114.412  10
  -4   3   3 1413.42 116.667  10
   4   3  -3 1251.69 114.446  10
   4  -3  -3 1198.73 113.579  10
  -4   3   3 1276.68 114.041   6
  -4   3   3 989.874 109.596   8
  -4  -3   3 1257.21 115.817   2
   4  -3  -3 874.732 112.504   2
  -4  -3   3 1068.28 110.383  15
   4  -3  -2 5249.53 669.598   2
   4   3  -2 7380.83 674.428  11
   4   3  -2 7370.54 669.753  10
   4  -3  -2 6803.16 668.063  10
  -4  -3   2 7199.95 664.264   9
  -4  -3   2 7839.20 675.443   6
  -4  -3   2 8112.63 673.036   7
   4   3  -2 6285.97 673.443   8
  -4  -3   2 7396.09 670.050   2
  -4  -3   2 6868.51 664.387  15
  -4  -3   1 280.389 29.2789  15
   4   3  -1 290.950 36.2234   7
   4   3  -1 238.208 39.5938   8
  -4   3   1 361.703 41.0294   5
   4   3  -1 265.491 36.7207   6
  -4  -3   1 239.221 36.0473   5
   4  -3  -1 244.459 33.1874   6
  -4  -3   1 358.799 42.7738   6
   4   3  -1 305.003 29.2139  12
   4   3  -1 341.950 40.2362  11
   4  -3  -1 254.523 34.1001  10
   4   3  -1 321.062 37.0112  10
  -4  -3   1 268.625 31.0875   9
   4   3  -1 318.024 33.5771   2
  -4   3   1 279.529 30.3796   1
  -4  -3   1 320.195 37.1649   2
  -4   3   0 348.808 35.8785   1
  -4  -3   0 360.381 33.2467  15
   4   3   0 374.546 50.6246   8
  -4  -3   0 224.779 34.1900  14
   4   3   0 423.092 35.3062  12
   4   3   0 444.297 47.6503  11
   4   3   0 428.899 39.0872   2
  -4  -3   0 445.208 45.3396   5
   4   3   0 359.099 43.8238   7
   4   3   0 400.615 45.9864   6
  -4  -3   0 416.857 38.7071   9
  -4  -3   0 434.129 41.9961   3
  -4   3  -1 845.264 76.2746  14
   4   3   1 733.398 67.3869  12
  -4   3  -1 630.136 67.6936   1
  -4   3  -1 670.117 74.4652   9
  -4  -3  -1 682.686 70.5199   9
   4   3   1 642.691 69.9024   2
  -4  -3  -1 698.025 71.9939   3
  -4  -3  -1 653.404 63.9721  15
   4   3   1 582.048 76.5472   6
   4   3   2 1869.91 192.982   2
   4  -3   2 1355.42 194.586   5
   4  -3   2 2006.28 191.010   7
  -4   3  -2 1881.35 196.857   9
  -4  -3  -2 1951.44 193.801   9
  -4  -3  -2 2189.28 194.666   3
  -4  -3  -2 1887.53 185.612  15
   4   3   2 2274.90 190.423  12
  -4  -3  -3 70.7798 16.8304   9
   4  -3   3 113.160 15.6498   7
  -4   3  -3 112.081 19.9660  15
  -4  -3  -3 88.6716 10.4221  15
  -4  -3  -4 4273.92 454.997   9
   4   3   4 4411.47 460.912   3
   4  -3   4 4355.74 458.877   3
   4  -3   4 5391.15 450.235   7
  -4   3  -4 4740.19 453.952  15
  -4  -3  -4 4490.64 445.477  15
   4   3   4 4959.48 448.745  14
   4  -3   5 664.012 84.8092   3
   4   3   5 672.806 85.9422   3
  -4   3  -5 660.359 82.7025   9
  -4  -3  -5 709.096 82.3602   9
  -4  -3  -5 679.323 71.1660  15
  -4   3  -5 977.989 82.8785  15
   4   3   5 757.157 73.6558  14
  -4  -3  -6 3109.62 274.010   4
  -4   3  -6 2887.45 285.458   9
  -4  -3  -6 2544.60 282.299   9
   4   3   6 2762.67 288.300   3
   4  -3   6 2422.00 284.627   3
   4   3   6 2726.81 272.465  14
  -4   3  -6 3018.98 279.581  15
  -4  -3  -7 86.5461 24.2836   9
  -4   3  -7 49.6446 23.8770   9
   4   3   7 106.087 29.3983   3
   4  -3   7 27.5193 22.7906   3
  -4   3  -7 94.9203 23.1911  15
  -4  -3  -8 315.776 53.6871   9
  -4   3  -8 383.105 58.2052   9
   4  -3   8 322.139 57.3853   3
   4   3   8 385.770 59.2610   3
  -4   3  -8 486.097 53.4158  15
  -4  -3  -9 68.2819 27.6747   9
   4   3   9 67.1093 30.5439   3
   4  -3   9 49.2364 29.4627   3
  -4   3  -9 116.997 28.1247  15
  -4   3  -9 90.2079 32.1387   9
  -4   3 -10 250.395 41.3311  15
  -4   3 -10 180.058 45.5542   9
  -4   4  13 12.2333 23.5993   3
  -4  -4  13-9.03408 23.1435   3
  -4   4  12 3.66147 20.4402   3
  -4  -4  12 40.3585 22.5054   3
   4  -4 -12 35.4076 20.2855  12
  -4   4  11 413.917 49.2701   2
   4  -4 -11 471.543 60.1377  12
  -4   4  11 439.314 57.3558   3
  -4  -4  11 467.845 59.3185   3
  -4  -4  10 36.6277 23.5319   4
   4   4 -10 45.6121 13.4060   9
  -4  -4  10 46.4598 20.0698   3
  -4   4  10 30.4904 17.5657   3
   4  -4 -10 17.1132 16.7067  12
  -4   4  10 46.5894 12.4534   2
  -4  -4  10 44.4542 17.0736   1
  -4  -4   9 3456.61 300.888   4
   4   4  -9 3040.63 284.921   9
  -4   4   9 2846.63 284.940   2
  -4  -4   9 3245.24 290.709   1
   4  -4  -9 2550.33 292.070  12
  -4  -4   9 2916.35 292.625   3
  -4   4   9 2739.51 290.603   3
  -4  -4   8 62.0032 22.2750   4
   4   4  -8 56.9639 10.6405   9
   4  -4  -8 28.2038 8.72271   1
  -4  -4   8 66.6852 16.6993   1
  -4   4   8 56.5515 11.5381   2
   4  -4  -8 54.8213 17.7286  12
  -4  -4   8 39.1928 16.3583   3
  -4   4   8 69.2375 16.6850   3
  -4  -4   7 2827.75 243.255   3
  -4   4   7 2701.61 241.628   3
  -4  -4   7 3573.84 254.274   4
  -4  -4   7 2999.93 236.137  12
  -4  -4   7 3115.90 244.863   1
  -4  -4   6 147.139 26.0622   1
  -4   4   6 135.637 20.9551   2
  -4  -4   6 172.626 24.7288   3
  -4  -4   6 179.048 18.5231  12
  -4   4   6 98.0241 21.3023   3
  -4  -4   6 183.370 29.3379   4
  -4  -4   5 2179.14 187.560  10
  -4   4   5 2446.28 189.256  10
  -4   4   5 1875.15 188.330   3
  -4  -4   5 1720.84 188.925   3
  -4  -4   5 2037.72 191.075   2
  -4   4   5 1689.04 185.824  13
  -4  -4   5 1629.15 186.158  13
  -4   4   4 310.540 38.1760  13
  -4  -4   4 304.791 38.6368  13
  -4  -4   4 316.952 36.5416  15
   4   4  -4 380.930 39.7339  10
  -4  -4   4 389.282 40.0924  10
   4  -4  -4 390.302 39.1132  10
   4   4  -4 310.046 44.8239  11
  -4   4   4 394.628 38.0125   6
  -4  -4   4 364.108 42.1051   2
   4  -4  -4 322.508 37.8978   2
  -4  -4   3 1921.12 195.340  15
  -4   4   3 2084.58 196.490   8
   4   4  -3 2381.52 199.338  10
   4  -4  -3 1960.86 197.553  10
  -4  -4   3 1943.75 193.435   9
   4  -4  -3 1846.98 198.879   2
  -4  -4   3 2412.12 201.886   2
  -4  -4   3 2312.94 204.806   6
  -4  -4   3 2253.75 204.040   7
   4   4  -3 2151.95 207.051  11
   4   4  -2 1144.29 121.814  11
   4  -4  -2 1201.99 114.611  10
   4   4  -2 1386.00 116.703  10
  -4  -4   2 999.197 110.536  15
   4   4  -2 989.188 121.807   8
  -4  -4   2 1447.66 127.917   8
  -4  -4   2 1237.79 117.169   2
  -4  -4   2 1399.75 123.784   6
   4   4  -1 3262.16 329.702  11
   4  -4  -1 3434.73 324.261  10
   4   4  -1 3302.44 325.879  10
   4   4  -1 3416.32 327.822   6
  -4  -4   1 3602.26 327.871   5
  -4   4   1 4263.30 333.978   5
   4  -4  -1 3179.58 321.758   6
  -4  -4   1 4014.24 335.837   6
   4   4  -1 3630.22 319.243  12
   4   4  -1 2687.50 332.728   8
   4   4  -1 2916.11 328.882   7
  -4  -4   1 3740.63 327.029   2
  -4  -4   1 3116.71 318.131  15
  -4   4   0 83.6528 18.8167  14
  -4  -4   0 73.3013 17.0602   5
   4   4   0 91.5389 15.1215   2
  -4   4   0 71.1851 13.3707   1
  -4   4   0 102.890 16.2952   7
   4   4   0 183.369 27.1809   6
   4   4   0 225.188 35.0134   7
   4  -4   0 107.955 13.7812   8
   4   4   0 300.460 41.5298   8
  -4  -4   0 71.6495 16.5362   3
   4   4   0 94.8829 12.4679  12
   4   4   1 5595.51 576.772   2
  -4   4  -1 5351.56 576.672   1
   4   4   1 6415.07 575.902  12
  -4  -4  -1 6454.28 579.935   3
  -4   4  -1 7566.37 586.865  14
   4   4   1 5736.74 595.622   8
   4   4   2 178.580 33.9688  11
  -4  -4  -2 211.919 30.2676   9
   4   4   2 209.000 27.5816   2
   4   4   2 245.103 26.9825  12
  -4  -4  -2 267.723 31.3645   3
  -4  -4  -3 2016.10 217.327   9
  -4   4  -3 2450.08 220.250  15
   4  -4   3 2492.41 215.804   7
   4   4   3 1929.15 213.213   2
  -4   4  -4 272.605 36.1973  15
  -4  -4  -4 190.661 33.7150   9
   4  -4   4 254.690 31.8390   7
  -4   4  -4 250.986 37.2723   9
  -4  -4  -5-3.18023 14.5125   9
  -4   4  -5 3.50960 14.1682   9
  -4   4  -5-5.31186 16.5714  15
   4   4   5-4.10116 19.1167   3
   4  -4   5-3.66875 17.1014   3
  -4  -4  -6 68.8715 15.7621   4
  -4   4  -6 11.5425 17.2556   9
  -4  -4  -6 54.2105 19.2626   9
  -4   4  -6 74.0378 22.1993  15
   4   4   6 22.2095 20.6673   3
   4  -4   6 32.3711 21.4706   3
   4  -4   7 1060.64 126.681   3
   4   4   7 1015.94 128.280   3
  -4   4  -7 1440.51 124.866  15
  -4  -4  -7 1100.85 126.128   9
  -4   4  -7 1004.58 125.699   9
  -4   4  -8 124.451 33.5645   9
  -4  -4  -8 146.459 34.4810   9
  -4   4  -8 175.992 32.3799  15
   4  -4   8 112.543 34.0878   3
   4   4   8 113.592 35.3687   3
   4  -4   9 1711.81 195.758   3
   4   4   9 1769.97 196.409   3
  -4   4  -9 2172.28 189.610  15
  -4  -4  -9 1483.72 190.751   9
  -4   4  -9 1813.86 194.967   9
  -4   4 -10 24.2575 24.9973  15
   4  -5 -12 994.776 111.334  12
  -4   5  12 903.053 106.956   3
  -4  -5  12 971.544 110.005   3
  -4   5  11 145.769 31.7298   3
  -4  -5  11 227.958 37.8307   3
   4  -5 -11 220.088 38.0976  12
  -4   5  10 751.270 83.6101   3
  -4  -5  10 741.207 84.9315   3
  -4   5  10 673.649 75.5406   2
  -4  -5  10 820.269 94.4403   4
  -4  -5  10 919.338 85.4769   1
   4  -5 -10 625.454 85.1931  12
  -4  -5   9 136.728 31.0285   4
  -4  -5   9 123.716 25.1974   1
  -4  -5   9 89.3978 24.0179   3
  -4   5   9 120.158 24.1015   3
  -4  -5   8 49.5376 23.2325   4
   4   5  -8 46.5811 19.5231  15
   4  -5  -8 21.1642 7.32553   1
  -4  -5   8 30.3773 17.0410   1
  -4  -5   8 38.0980 16.6124   3
  -4   5   8 36.8304 15.4139   3
  -4  -5   7 452.525 58.9514   4
  -4  -5   7 368.102 46.7937   3
  -4   5   7 424.782 47.1150   3
   4   5  -7 414.787 49.3330  15
   4  -5  -7 360.165 38.3369   1
  -4  -5   7 408.453 50.9259   1
  -4  -5   7 415.658 40.9557  12
  -4  -5   6 2756.51 256.313   4
   4   5  -6 2434.28 246.013  15
  -4  -5   6 2304.65 244.569   3
  -4   5   6 2280.02 243.384   3
  -4  -5   6 2529.32 237.806  12
  -4  -5   6 2866.26 252.195   1
  -4   5   5 43.0606 11.2044  13
   4   5  -5 42.1359 13.7601  15
  -4  -5   5 62.7119 12.0839  13
  -4  -5   5 32.4188 12.7621   3
  -4   5   5 60.7811 12.7750   3
   4  -5  -5 53.7746 16.6046  12
  -4   5   5 67.3145 14.7974  10
  -4  -5   5 57.1856 12.1568  10
   4  -5  -5 48.4010 6.84574   1
  -4  -5   5 26.9909 17.3244   4
  -4  -5   4 3203.53 318.502  13
  -4   5   4 3012.11 317.705  13
  -4  -5   4 3560.77 325.116   6
  -4   5   4 3709.31 316.103   6
  -4  -5   4 4075.42 331.662   4
   4  -5  -4 3643.30 318.549  10
   4   5  -4 3459.14 319.179  10
  -4  -5   4 3268.14 319.377  10
  -4  -5   4 3225.81 313.630   9
   4  -5  -4 3380.46 314.746   1
  -4   5   4 3309.01 321.643   8
  -4  -5   4 2933.80 316.210  15
   4  -5  -4 2965.10 317.200   2
  -4  -5   4 3733.52 323.875   2
  -4  -5   3 1104.92 101.979   6
   4   5  -3 951.205 103.652  11
   4  -5  -3 813.477 90.3431  11
   4   5  -3 1105.18 94.3541  10
   4  -5  -3 897.625 92.6157  10
   4  -5  -3 989.400 91.1464   1
  -4  -5   3 879.438 91.2111  15
  -4   5   3 1019.25 94.1014   8
  -4   5   3 1014.16 104.849  14
  -4  -5   3 1027.47 97.4872   2
   4  -5  -3 801.058 94.4107   2
  -4  -5   2 3747.50 351.008   2
   4  -5  -2 3948.85 348.247  10
   4   5  -2 4410.94 350.152  10
   4  -5  -2 3565.78 346.367   1
  -4  -5   2 4002.09 357.927   6
   4   5  -2 2894.94 357.468   8
  -4   5   2 4814.24 359.316  14
  -4  -5   2 3137.03 344.578  15
   4   5  -1 237.680 30.7131  10
   4  -5  -1 214.232 28.5058  10
   4   5  -1 230.895 40.4489   8
  -4  -5   1 285.208 32.7356   2
   4  -5  -1 242.423 27.7760   1
  -4   5   1 296.341 36.6711   5
  -4  -5   1 218.666 31.2328   5
  -4  -5   1 324.672 41.8448   6
   4  -5  -1 223.377 25.6798   6
  -4   5   1 252.640 36.8227   7
   4   5  -1 200.979 35.6910   7
   4  -5   0 242.994 25.3169   8
  -4   5   0 231.629 28.4295   7
   4   5   0 206.862 38.4978   8
  -4  -5   0 177.641 24.2993   3
   4   5   0 203.234 22.1100  12
   4   5   0 128.347 31.0326   7
   4  -5   0 98.4154 23.2222   6
   4   5   0 205.800 32.1518  11
  -4  -5  -1 98.9826 15.3924  12
  -4  -5  -1 95.1480 17.0148   3
   4   5   1 102.534 23.5626  11
   4   5   1 93.6589 26.9887   7
  -4   5  -1 132.311 24.1976  14
   4   5   1 112.320 30.7735   8
   4  -5   1 112.751 16.2799   8
   4   5   1 87.9681 14.6829   2
   4   5   2 1389.94 121.857  12
  -4  -5  -2 1098.38 122.167  12
   4   5   2 1128.01 119.933   2
   4   5   2 1275.83 132.111  11
  -4  -5  -2 1284.98 123.225   3
  -4  -5  -3 1012.49 95.5187   4
   4   5   3 928.081 100.232  11
  -4  -5  -3 795.020 90.8647  12
  -4   5  -3 1046.66 99.1190  15
   4   5   3 798.845 87.3764   2
   4  -5   4 2971.72 258.582   7
  -4  -5  -4 2252.96 255.776  12
   4   5   4 2508.90 264.502  11
   4   5   4 2317.74 252.008   2
  -4   5  -4 2746.91 264.422   9
  -4  -5  -4 2310.55 259.889   9
  -4   5  -4 2979.38 262.196  15
  -4  -5  -4 3456.09 262.025   4
  -4   5  -5 134.791 30.4210   9
  -4  -5  -5 179.712 32.4779   9
  -4   5  -5 157.215 32.1724  15
  -4  -5  -5 220.354 31.3020   4
   4   5   6 1506.59 174.272   3
   4  -5   6 1490.92 171.979   3
  -4  -5  -6 1481.47 171.246   9
  -4   5  -6 1619.46 174.041   9
  -4   5  -6 2062.84 172.902  15
   4   5   7 466.205 68.6773   3
   4  -5   7 527.646 68.8313   3
  -4   5  -7 564.848 64.7924  15
  -4   5  -7 499.944 67.5228   9
  -4  -5  -7 401.664 63.8819   9
  -4   5  -8 159.629 41.1487   9
  -4   5  -8 279.254 42.2513  15
  -4  -5  -8 182.057 38.7292   9
   4  -5   8 188.765 41.0738   3
   4   5   8 166.680 41.7744   3
  -4   5  -9-5.05411 26.3400   9
  -4  -5  -9 10.4478 22.7785   9
  -4   5  -9 18.1307 26.2766  15
   4  -5   9 10.3271 26.9102   3
   4   5   9-10.7382 28.8989   3
  -4   6  12-13.5349 20.3710   3
  -4  -6  12 3.82605 24.1547   3
  -4   6  11 115.266 28.0303   3
  -4  -6  11 153.240 32.8093   3
  -4   6  10 218.411 37.0257   3
  -4  -6  10 279.101 40.1574   3
  -4  -6  10 335.123 53.1128   4
  -4  -6  10 301.304 43.1904   1
  -4  -6   9 780.384 97.1301   3
  -4   6   9 791.270 96.0490   3
  -4  -6   9 1080.25 103.646   1
   4   6  -9 1104.67 105.988  15
  -4  -6   9 972.626 112.560   4
  -4  -6   8 2036.52 181.329   4
  -4  -6   8 1546.41 162.222   3
  -4   6   8 1525.17 161.005   3
  -4  -6   8 1862.96 169.028   1
   4  -6  -8 1275.45 164.610  12
   4   6  -8 1690.93 167.243  15
  -4  -6   7 762.449 83.2435   4
  -4  -6   7 577.332 66.1314   3
  -4   6   7 514.223 64.1545   3
  -4  -6   7 704.530 74.7541   1
   4  -6  -7 555.703 70.7374  12
   4   6  -7 604.927 69.7097  15
  -4  -6   6 1512.65 137.117   4
  -4  -6   6 1328.80 128.094   1
  -4  -6   6 1129.21 117.522   3
  -4   6   6 1074.92 116.309   3
   4   6  -6 1144.87 120.087  15
   4  -6  -6 1029.07 122.573  12
   4  -6  -5 572.045 56.6291   1
   4   6  -5 604.738 63.5642  15
  -4   6   5 566.836 65.9928   8
  -4  -6   5 576.776 61.5767   3
  -4   6   5 487.526 59.5840   3
  -4   6   5 530.616 58.7971  13
   4  -6  -5 533.862 67.2220  12
  -4  -6   5 791.724 79.1547   4
  -4   6   5 827.961 64.6196  10
  -4  -6   5 624.434 60.6784  10
  -4  -6   5 527.905 54.9951   9
  -4   6   5 539.824 54.8171   6
  -4  -6   5 594.101 65.2658   2
  -4   6   4 165.952 30.0438  14
  -4  -6   4 137.083 18.4109  13
  -4   6   4 115.227 17.6347  13
   4  -6  -4 90.0288 16.3113   2
  -4  -6   4 119.346 21.7727   2
   4  -6  -4 141.739 16.5198   1
  -4  -6   4 171.179 31.5296   4
  -4  -6   4 132.006 16.3488   9
  -4  -6   4 112.346 19.3424   3
  -4   6   4 122.398 18.8425   3
  -4   6   4 161.758 23.4425   8
   4   6  -4 138.130 21.4907  15
  -4  -6   4 157.996 24.7980   6
  -4  -6   3 210.303 27.3162  15
  -4   6   3 219.943 28.2128  13
  -4  -6   3 227.303 29.0092  13
  -4   6   3 294.866 38.7560  14
   4  -6  -3 230.295 27.6119  11
   4  -6  -3 284.183 28.7712  10
   4   6  -3 311.371 29.7104  10
  -4   6   3 279.503 31.4826   8
   4  -6  -3 272.378 28.8288   1
  -4  -6   3 253.738 36.1159   6
  -4  -6   3 308.106 34.4625   2
   4  -6  -3 206.953 30.0076   2
  -4  -6   3 260.303 40.6179   4
  -4   6   2 1861.60 171.276   5
  -4  -6   2 1495.46 165.930   5
  -4  -6   2 1760.30 174.169   6
   4  -6  -2 1804.93 164.079  11
   4   6  -2 1846.48 164.246  10
   4  -6  -2 1606.67 162.761  10
   4   6  -2 1359.00 175.673   8
   4  -6  -2 1549.23 163.471   1
  -4  -6   2 1628.88 166.904   2
  -4   6   2 1949.21 174.411  14
  -4   6   1 2124.94 160.270  14
  -4  -6   1 1344.80 142.873  14
  -4  -6   1 1363.24 143.545  12
   4   6  -1 1605.46 158.369  11
   4   6  -1 1697.61 147.982  10
   4  -6  -1 1413.67 145.495  10
  -4  -6   1 1489.90 146.875   3
  -4   6   1 1756.15 150.829   3
   4   6  -1 1311.14 161.691   8
   4   6  -1 1052.97 155.740   7
  -4  -6   1 1638.44 150.891   2
  -4  -6   1 1892.41 160.338   4
  -4   6   1 1859.59 154.834   5
  -4  -6   1 1400.17 148.405   5
  -4  -6   1 1949.64 163.732   6
  -4   6   1 1420.75 157.233   7
  -4   6   0 1766.05 146.873  14
  -4  -6   0 1416.87 133.254  12
   4   6   0 1548.61 146.207  11
   4  -6   0 1389.13 135.386  10
   4   6   0 1622.08 139.200  10
  -4  -6   0 1441.88 134.330   3
   4  -6   0 1632.64 135.767   6
   4   6   0 1117.17 147.906   7
   4   6   0 1397.14 155.238   8
   4  -6   0 1771.29 139.419   8
  -4   6   0 1493.44 142.447   7
  -4  -6   0 1921.93 149.152   4
   4  -6   0 1407.84 136.139   1
  -4  -6  -1 2182.87 181.061   4
  -4  -6  -1 1693.10 168.529   3
   4   6   1 1676.40 178.156  11
   4  -6   1 2112.72 172.124   8
   4   6   1 1422.01 187.315   8
  -4  -6  -1 1527.68 168.218  12
   4   6   1 1391.60 184.645   7
   4   6   2 2131.94 224.264  11
  -4  -6  -2 2904.83 227.981   4
  -4  -6  -2 2449.30 215.893   3
  -4  -6  -2 1976.47 215.428  12
   4   6   2 1999.02 212.348   2
   4  -6   2 2398.99 216.930   8
   4   6   2 2070.95 237.456   8
   4   6   3 625.567 68.0564   2
   4   6   3 704.411 80.9428  11
  -4  -6  -3 631.312 73.0838  12
  -4   6  -3 830.775 82.2935  15
  -4  -6  -3 840.931 82.2032   4
  -4  -6  -4 50.9315 18.9903   4
   4   6   4 14.2465 7.38813   2
  -4  -6  -4 25.4390 13.3116  12
  -4   6  -4 31.5906 20.0098  15
   4   6   4-3.65599 15.2577  11
   4   6   5 11.5982 16.4503  11
  -4  -6  -5-7.96929 14.2978  12
  -4  -6  -5 3.73829 16.2995   9
  -4   6  -5-10.0344 21.3482  15
  -4  -6  -5-3.04040 16.1066   4
  -4   6  -6 107.127 31.6764   9
  -4  -6  -6 128.931 26.1697   4
  -4  -6  -6 82.3853 27.6825   9
  -4   6  -6 148.059 32.5728  15
   4   6   6 85.4080 28.1886  11
  -4  -6  -7 192.623 40.6197   9
   4   6   7 238.387 41.9590  11
  -4   6  -7 270.191 42.5767  15
  -4   6  -7 168.520 40.6706   9
   4   6   8 1005.94 118.194  11
  -4   6  -8 1269.54 120.727  15
  -4  -6  -8 889.686 118.515   9
  -4   6  -8 971.861 120.902   9
  -4   6  -9 967.651 104.125   9
   4   6   9 661.880 93.2409  11
  -4   7  12 41.4623 22.4018   3
  -4  -7  12 36.2313 26.7375   3
  -4   7  11 629.441 77.8229   3
  -4  -7  11 636.588 79.8810   3
  -4  -7  11 787.380 84.7251   1
   4  -7 -10 28.8852 20.4920  12
  -4  -7  10 88.5110 28.5206   1
  -4   7  10 25.5902 16.5549   3
  -4  -7  10 82.8938 23.0107   3
  -4  -7  10 46.2571 34.6332   4
  -4  -7   9 299.763 43.9262   1
  -4  -7   9 251.172 35.9921   3
   4  -7  -9 150.669 35.8867  12
  -4   7   9 206.367 32.7197   3
   4   7  -9 314.151 46.2076  15
  -4  -7   9 273.730 52.4693   4
  -4  -7   8 114.343 30.1325   1
  -4  -7   8 104.611 35.9653   4
   4  -7  -8 91.7023 25.1156  12
   4   7  -8 85.2891 26.3397  15
  -4  -7   8 109.093 21.5728   3
  -4   7   8 64.3710 18.1826   3
   4  -7  -7 187.148 35.6252  12
  -4  -7   7 202.400 44.2410   4
  -4  -7   7 217.900 29.8235   3
  -4  -7   7 241.028 40.3347   1
   4   7  -7 245.141 36.2945  15
  -4   7   7 161.734 26.7548   3
  -4  -7   6 162.969 37.5586   4
  -4  -7   6 184.590 24.6893   3
  -4   7   6 167.799 23.3927   3
  -4  -7   6 209.683 36.6059   1
  -4   7   6 88.1488 26.6012   8
   4   7  -6 223.907 31.1358  15
   4  -7  -6 131.375 29.1746  12
   4  -7  -5 1548.06 158.199   1
   4   7  -5 1610.99 163.890  15
  -4   7   5 1611.06 166.851   8
  -4  -7   5 1594.03 160.542   3
  -4   7   5 1478.25 159.256   3
  -4   7   5 1623.78 169.371  14
   4  -7  -5 1352.26 167.114  12
  -4  -7   5 1874.82 180.567   4
  -4   7   5 1911.28 162.961  10
  -4  -7   5 1761.26 167.605   6
  -4  -7   5 1836.69 167.112   2
  -4   7   4 468.774 52.2861  13
  -4   7   4 651.633 64.6777  14
  -4  -7   4 467.876 60.2113   6
  -4  -7   4 624.216 60.6604   2
   4  -7  -4 481.004 51.9786   2
  -4  -7   4 600.527 73.4616   4
  -4  -7   4 535.900 54.5082   9
  -4   7   4 560.681 59.5932   8
   4  -7  -4 493.738 53.2519   1
   4   7  -4 571.773 57.5026  15
  -4  -7   4 466.369 53.8614   3
  -4   7   4 454.329 53.2569   3
  -4  -7   3 4182.55 362.980   6
   4  -7  -3 3817.78 351.981  11
  -4  -7   3 4501.11 373.596   4
   4   7  -3 3769.49 353.926  15
  -4   7   3 3490.89 350.454  13
  -4  -7   3 3519.44 350.931  13
  -4   7   3 4561.14 363.546  14
  -4  -7   3 3892.92 356.949   2
  -4  -7   3 3567.12 352.494   3
   4  -7  -3 3168.22 352.567   2
  -4   7   2 47.6054 13.0938   3
  -4  -7   2 25.3655 7.71034  14
  -4   7   2 43.7457 17.8083  14
  -4  -7   2 20.6426 8.69077  13
   4  -7  -2 39.9927 11.5201  11
   4   7  -2 34.9272 17.9648  11
   4   7  -2 42.4711 8.83261  10
   4  -7  -2 30.8448 7.80561  10
   4   7  -2-4.90682 17.1028   8
  -4  -7   2 32.8128 11.8967   2
  -4   7   2 51.3941 14.8183   5
  -4  -7   2 29.7875 10.5436   5
  -4  -7   2 39.3811 17.9205   6
  -4   7   1 546.209 58.0138  14
  -4  -7   1 344.223 41.9025  14
  -4  -7   1 347.505 42.3184  12
   4  -7  -1 448.180 47.3151  11
   4   7  -1 462.778 58.4787  11
   4  -7  -1 453.623 44.0661  10
   4   7  -1 560.982 45.9519  10
  -4  -7   1 376.472 43.6773   3
  -4   7   1 474.971 46.8344   3
   4  -7  -1 459.154 47.5010   1
  -4  -7   1 491.672 49.8945   2
   4   7  -1 404.090 63.0472   8
  -4  -7   1 489.354 60.4019   4
  -4  -7   1 422.911 58.0992   6
  -4   7   1 362.646 55.7603   7
   4   7  -1 297.193 56.3121   7
  -4  -7   0 43.7357 10.4788   3
  -4   7   0 48.8923 12.4143   3
  -4  -7   0 31.0554 9.55740  12
   4   7   0 32.8447 19.4493  11
   4   7   0 60.2926 12.6586  10
   4  -7   0 45.9133 10.4188  10
   4  -7   0 29.0841 12.1007   1
   4  -7   0 43.9462 8.61627   6
   4   7   0 22.5618 19.7734   7
  -4   7   0 36.3508 16.8376   7
   4   7   0 47.9184 24.5190   8
   4  -7   0 44.0093 16.5530   8
  -4  -7   0 76.3077 23.2858   4
  -4   7   0 87.8828 22.8844  14
  -4  -7  -1 26.6835 10.2641  12
  -4  -7  -1 7.91358 16.0281   4
   4  -7   1 6.24850 11.9655   8
   4   7   1 51.9543 26.9662   8
   4   7   1 3.50786 16.4052  11
   4   7   1-12.4332 22.9464   7
  -4  -7  -1 17.3485 9.03429   3
   4  -7   1 17.2697 12.1841   1
   4   7   2 123.422 28.2733  11
  -4   7  -2 195.033 25.6370   3
   4   7   2 161.875 43.2668   8
  -4  -7  -2 191.615 24.9072  12
  -4  -7  -2 195.411 34.5350   4
   4   7   3 2048.80 213.192  11
  -4  -7  -3 1916.95 205.910  12
   4   7   3 2166.00 231.398   8
  -4  -7  -3 2418.89 217.524   4
  -4  -7  -4 304.361 41.4155   4
   4   7   4 250.057 54.3225   8
  -4   7  -4 242.876 40.2493  15
   4   7   4 183.799 34.3351  11
  -4  -7  -4 145.109 29.0347  12
   4   7   5 996.497 120.786  11
  -4  -7  -5 1282.83 123.923   4
  -4  -7  -5 920.891 116.151  12
  -4   7  -5 1382.35 125.997  15
  -4  -7  -6 65.8380 27.7157   9
  -4   7  -6 112.754 32.4838  15
   4   7   6 95.3387 28.4221  11
  -4  -7  -7 778.387 98.8143   9
   4   7   7 718.906 94.2485  11
  -4   7  -7 1014.21 100.969  15
  -4  -7  -8 5.10022 27.0231   9
   4   7   8 7.92504 22.3107  11
  -4   7  -8 4.09956 27.8601  15
   4   7   9 23.8557 24.9079  11
  -4   8  10 374.633 53.1743   3
   4  -8 -10 347.782 60.4259  12
  -4  -8  10 584.023 67.6531   1
   4   8 -10 481.396 66.5427  15
  -4  -8  10 615.172 80.8135   4
   4  -8  -9-4.04219 16.7674  12
   4   8  -9-3.72919 24.5840  15
  -4  -8   9 12.9454 34.2896   4
  -4  -8   9-12.0739 23.9154   1
  -4   8   9 21.0082 16.1185   3
  -4  -8   8 1928.79 174.446   4
  -4   8   8 1320.23 143.712   3
  -4  -8   8 1453.87 145.264   3
  -4   8   8 927.262 151.829   8
   4  -8  -8 1399.21 153.738  12
  -4  -8   8 1856.92 161.263   1
   4   8  -8 1800.07 157.911  15
   4   8  -7 70.7075 24.5689  15
  -4   8   7 72.0157 24.9627   8
  -4  -8   7 77.1531 31.6624   1
   4  -8  -7 48.3986 21.8418  12
  -4  -8   7 149.401 40.2048   4
  -4   8   7 36.7517 21.0265  14
  -4   8   7 64.8027 14.6505   3
  -4  -8   7 70.4957 15.4725   3
   4  -8  -6 392.579 55.3377  12
  -4   8   6 497.327 56.1425  14
  -4  -8   6 413.554 66.8696   4
  -4  -8   6 395.306 46.6558   3
  -4   8   6 378.118 45.8786   3
  -4   8   6 397.091 55.0056   8
  -4  -8   6 470.679 54.8862   6
   4   8  -6 452.201 54.5269  15
   4  -8  -6 393.831 45.3004   1
  -4  -8   6 593.200 67.9258   1
  -4   8   5 19.0831 16.3676  14
   4  -8  -5 20.6359 16.8501  12
  -4  -8   5 17.1005 26.6723   4
  -4  -8   5 33.3813 15.6291   2
  -4  -8   5 36.3127 10.9960   3
  -4   8   5 15.5788 9.16464   3
  -4   8   5 65.3066 19.7079   8
  -4  -8   5 29.0127 16.7281   6
   4   8  -5 6.59676 14.5342  15
  -4  -8   4 114.715 24.2216   6
  -4  -8   4 150.912 36.4578   4
  -4  -8   4 84.5001 21.1514   2
  -4  -8   4 96.8727 15.6941   3
  -4   8   4 95.4942 15.0664   3
  -4   8   4 121.082 22.7587   8
  -4   8   4 120.240 25.4479  14
   4   8  -4 99.4173 21.1218  15
  -4   8   3 92.5761 17.1007   5
  -4  -8   3 59.0118 12.4046   5
  -4  -8   3 67.2544 26.6680   4
  -4  -8   3 83.9669 17.9517   2
   4  -8  -3 63.0087 14.7031   1
   4   8  -3 59.6529 15.1697  15
  -4   8   3 49.2727 20.3234  14
  -4  -8   3 62.6446 10.9728   3
  -4   8   3 40.8376 10.5239   3
  -4  -8   3 82.5677 21.4915   6
   4   8  -2 1123.68 112.682  11
  -4  -8   2 949.577 93.8122   3
  -4  -8   2 977.724 99.3450   2
   4  -8  -2 1126.63 99.3625   1
  -4   8   2 922.677 92.8301  13
  -4   8   2 1117.28 95.6725   3
  -4   8   2 1033.27 117.627   7
  -4  -8   2 1139.60 109.657   6
  -4  -8   2 797.503 91.6566  12
  -4   8   1 58.7743 11.4665   3
  -4  -8   1 48.3099 14.8103   2
   4  -8  -1 48.5100 15.0124   1
  -4  -8   1 48.8654 9.96619  12
   4   8  -1 44.8023 21.4976  11
   4  -8  -1 49.8762 8.97744  10
   4   8  -1 67.8106 9.91446  10
  -4   8   1 67.7230 22.3260  14
  -4  -8   1 57.8493 25.6472   4
   4   8  -1 51.9253 26.8272   7
  -4   8   1 55.0799 24.4704   7
  -4   8   0 2019.29 164.006  14
  -4  -8   0 1289.55 148.113  12
   4   8   0 1651.19 164.112  11
  -4  -8   0 1735.75 168.902   4
   4  -8   0 1413.16 146.982  10
   4   8   0 1792.02 148.901  10
  -4   8   0 1538.06 148.257   3
   4  -8   0 1521.95 153.176   1
   4   8   0 1249.61 168.892   7
  -4   8   0 1356.90 160.130   7
  -4  -8  -1 63.4322 27.6139   4
   4   8   1 46.3000 14.1757  10
   4  -8   1 44.1577 11.8095  10
   4   8   1 57.0857 22.1629  11
   4   8   1 33.6071 26.7288   7
   4  -8   1 73.1461 19.0464   1
  -4  -8  -1 35.5574 12.0165  12
   4   8   2 1885.54 197.161  11
   4   8   2 1741.21 211.204   7
  -4   8  -2 2496.32 201.004  15
  -4  -8  -2 2016.06 201.370   4
  -4  -8  -2 1671.25 186.938  12
   4   8   3 3.57349 17.6714  11
   4   8   3-15.3949 31.0739   7
  -4   8  -3-7.04617 23.2268  15
  -4  -8  -3 4.39392 20.9067   4
  -4  -8  -3 17.3980 14.1913  12
  -4  -8  -4 55.1479 27.1252   4
   4   8   4 39.0177 20.1556  11
  -4  -8  -4 47.6789 16.9391  12
   4   8   5 10.8725 18.9780  11
  -4  -8  -5 22.7678 17.2264  12
  -4  -8  -5 27.7310 23.6119   4
  -4  -8  -6 60.4684 25.5061   9
  -4   8  -6 92.9488 32.6113  15
  -4  -8  -6 60.2692 23.1361  12
   4   8   6 77.2689 26.3241  11
  -4   8  -7 4.21382 28.3794  15
   4   8   7 25.8467 23.0741  11
  -4  -8  -7 9.99515 23.3310   9
   4   8   8 662.036 81.4228  11
  -4  -9  10 106.529 44.1157   4
   4   9 -10 21.4034 30.5348  15
  -4  -9   9 26.5176 28.8762   1
  -4   9   9 13.5102 23.1345   8
  -4  -9   9 34.1767 33.2028   4
   4  -9  -9 16.6989 21.8198  12
  -4   9   9 14.8783 21.0631  14
   4   9  -9 11.6845 27.0297  15
  -4  -9   8 13.6347 26.5080   1
  -4  -9   8 48.3445 35.5382   4
  -4   9   8 75.1763 24.3578  14
   4   9  -8 42.1261 27.5366  15
  -4   9   8 29.1017 23.9601   8
   4  -9  -8 15.9062 20.2889  12
   4  -9  -7 239.600 43.9012  12
   4   9  -7 257.138 43.6546  15
  -4   9   7 312.644 47.6971   8
  -4   9   7 299.938 41.7795  14
  -4  -9   7 234.339 42.1689   6
  -4  -9   7 318.060 52.1950   1
   4  -9  -6 40.6407 21.4097  12
  -4  -9   6 79.0472 37.5607   4
   4   9  -6 119.216 27.8043  15
  -4   9   6 66.2342 24.1111   8
  -4   9   6 115.788 24.4280  14
  -4  -9   6 146.617 27.0028   2
  -4  -9   6 97.5039 34.2428   1
  -4  -9   6 102.363 24.9809   6
   4  -9  -5 509.412 76.8051  12
  -4  -9   5 731.944 77.1154   2
  -4  -9   5 772.700 95.3233   4
   4   9  -5 639.420 75.1858  15
  -4   9   5 642.967 77.6640   8
  -4   9   5 662.412 76.6183  14
   4  -9  -5 699.160 70.6626   1
  -4  -9   5 689.705 78.1213   6
  -4  -9   4 289.113 41.8367   6
  -4   9   4 249.743 32.2295   5
   4  -9  -4 183.865 38.3767  12
  -4  -9   4 287.481 53.8913   4
   4   9  -4 208.606 34.8886  15
  -4   9   4 273.893 38.6757   8
   4  -9  -4 288.620 34.0008   1
  -4   9   4 343.744 42.4434  14
  -4  -9   4 269.909 37.0423   2
  -4   9   3 1429.43 126.864  14
   4   9  -3 1040.30 116.650  15
   4  -9  -3 1202.24 118.081   1
  -4  -9   3 1191.64 119.556   2
  -4  -9   3 1053.07 123.926   6
  -4   9   3 1061.89 137.304   7
  -4   9   2 217.860 32.9408  14
  -4  -9   2 125.099 38.8785   4
  -4  -9   2 135.834 23.0851   2
   4  -9  -2 120.990 23.0374   1
  -4   9   2 109.401 34.8647   7
  -4  -9   2 124.290 31.0046   6
  -4   9   1 169.482 37.8770   7
   4   9  -1 121.380 35.9246   7
  -4  -9   1 71.5475 33.6516   4
  -4   9   1 173.479 30.0185  14
  -4  -9   1 136.584 23.4949   2
   4  -9  -1 114.028 22.9820   1
   4   9  -1 111.808 31.6080  11
   4   9   0 6.94777 27.3207   7
  -4   9   0 26.1006 22.3685   7
   4   9   0 20.9523 20.0245  11
   4  -9   0 15.5280 15.1910   1
  -4  -9   0 31.9780 22.7563   4
  -4  -9  -1 5.17464 24.1268   4
   4   9   1-4.10019 20.2796  11
  -4  -9  -1 9.29869 10.6506  12
   4   9   1 14.5504 26.8150   7
   4  -9   1 4.77799 15.0896   1
  -4  -9  -2 26.7868 13.6811  12
   4   9   2 16.9735 11.3165  10
  -4   9  -2 21.4355 22.3988  15
  -4  -9  -2 30.2439 25.4735   4
   4   9   2 15.3632 29.3176   7
   4   9   2 43.0494 23.0597  11
   4   9   3 804.000 88.0892  11
  -4  -9  -3 821.450 94.3342   4
  -4   9  -3 837.523 89.2531  15
  -4  -9  -3 634.040 78.0092  12
   4   9   3 549.270 98.9425   7
   4   9   4 150.249 47.6235   7
  -4  -9  -4 204.251 42.5467   4
   4   9   4 171.066 34.2947  11
  -4  -9  -4 118.734 27.1707  12
  -4  -9  -5 343.198 47.3784  12
   4   9   5 292.348 50.3992  11
  -4  -9  -5 444.967 58.6105   4
   4   9   5 300.476 67.0447   8
   4   9   6 88.7915 40.2007   8
  -4  -9  -6 128.578 30.7568  12
   4   9   6 145.069 32.0242  11
   4   9   7 405.673 57.3301  11
   4  10  -9 124.192 38.7038  15
  -4 -10   9 165.361 47.2728   4
   4 -10  -8 284.311 46.5155  12
  -4  10   8 224.872 38.6341  14
   4  10  -8 282.919 50.0443  15
  -4 -10   8 325.023 64.1689   4
  -4 -10   8 405.553 58.2535   1
  -4 -10   8 297.290 47.1065   2
  -4 -10   8 239.534 42.3552   6
  -4 -10   7 523.837 65.8980   6
   4 -10  -7 352.546 64.2990  12
  -4 -10   7 640.393 69.5942   2
  -4 -10   7 487.569 83.3545   4
   4  10  -7 526.287 69.7793  15
  -4  10   7 470.380 67.7801   8
  -4 -10   7 689.212 79.8981   1
  -4  10   7 548.598 62.7651  14
   4 -10  -6 140.962 33.0651  12
  -4 -10   6 270.242 47.8655   1
  -4 -10   6 154.114 31.4996   2
  -4 -10   6 184.153 50.2888   4
   4  10  -6 160.372 32.5356  15
  -4  10   6 146.754 32.0137   8
  -4  10   6 112.338 27.4932  14
  -4 -10   6 178.820 33.5678   6
  -4 -10   5 58.2110 21.4450   6
  -4 -10   5 20.6783 31.5376   4
   4  10  -5 19.3485 18.1236  15
   4 -10  -5 14.8229 19.7692  12
  -4  10   5 21.5262 18.9574  14
  -4 -10   5 34.3735 19.6262   2
  -4  10   5 12.1795 17.2976   8
  -4 -10   4 6.61551 17.5538   6
   4 -10  -4 7.24176 17.5976  12
  -4 -10   4 26.6589 33.5698   4
   4  10  -4-2.03888 15.5544  15
  -4  10   4 5.56553 18.9368  14
  -4 -10   4 9.17827 14.5193   2
   4 -10  -4 32.3572 15.0447   1
  -4 -10   3-8.27911 13.4004   2
   4 -10  -3 25.4777 14.9567   1
  -4  10   3 8.66509 19.0702  14
   4  10  -3 29.3740 14.4396  15
  -4  10   3 27.0872 32.2326   7
  -4 -10   3 7.08986 17.8800   6
   4 -10  -2 414.976 54.6991   1
  -4  10   2 538.111 74.3399   7
  -4 -10   2 456.227 72.8638   4
  -4  10   2 548.458 61.9312  14
  -4 -10   1 604.587 82.0182   4
   4 -10  -1 578.697 64.8818   1
   4  10  -1 551.154 84.8264   7
  -4  10   1 483.516 76.8435   7
   4  10   0 239.784 41.6516  11
   4  10   0 202.759 49.5678   8
  -4 -10   0 129.301 39.4659   4
   4  10   0 207.839 52.4472   7
   4 -10   0 178.119 31.1399   1
   4  10   1 316.748 56.8360  11
  -4  10  -1 463.627 59.2014  15
   4  10   1 365.932 67.6734   8
  -4 -10  -1 456.035 68.7184   4
   4  10   1 463.277 77.5071   7
   4 -10   1 422.178 52.9359   1
   4  10   2 433.116 63.8922  11
  -4 -10  -2 491.522 70.9650   4
   4 -10   2 368.580 57.2882   1
   4  10   2 394.035 74.2178   8
   4  10   2 414.682 78.2513   7
  -4  10  -2 633.332 66.0317  15
  -4  10  -3 280.681 46.1218  15
   4  10   3 170.220 49.6594   8
  -4 -10  -3 208.611 46.1013   4
   4  10   3 141.022 51.5499   7
   4  10   3 183.007 38.8993  11
  -4  10  -4 8.21745 27.6421  15
   4  10   4 7.90087 30.0686   8
   4  10   4-8.58588 34.6575   7
  -4 -10  -4 4.87737 26.2507   4
   4  10   4-3.84259 20.6815  11
   4  10   5 33.5884 26.5983  11
  -4  10  -5 8.52757 29.8342  15
   4  10   5-17.4789 35.2975   7
   4  10   6 10.8949 21.0425  11
   4  11  -8-3.66312 27.6779  15
  -4 -11   8 21.7966 26.3383   2
   4  11  -7 127.905 34.1703  15
  -4 -11   7 110.930 31.5127   2
   4  11  -6 172.665 36.0187  15
  -4  11   6 215.190 32.9106  14
   4 -11  -6 136.782 34.5176  12
  -4 -11   6 199.332 55.2785   4
  -4 -11   6 158.936 45.0880   1
  -4 -11   6 199.547 34.8231   2
  -4  11   5 30.6780 19.7705  14
   4  11  -5-4.94765 21.0614  15
   4 -11  -5-3.75341 21.1364  12
  -4 -11   5 14.4627 33.0019   4
  -4 -11   4 503.207 83.5633   4
  -4  11   4 634.546 68.3249  14
  -4  11   4 514.714 87.7513   7
   4 -11  -4 487.002 68.8877  12
   4 -11  -3 86.9965 20.9075   1
  -4  11   3 72.3532 23.3533  14
   4 -11  -3 25.5674 21.9194  12
  -4  11   3 54.8590 36.2025   7
  -4 -11   2 455.730 77.5666   4
  -4  11   2 567.640 80.4951   7
   4 -11  -2 465.232 57.6938   1
   4 -11  -1 9.76427 18.7246   1
  -4  11   1 11.5033 26.2441   7
  -4 -11   1-19.5030 29.6633   4
  -4 -11   0-12.5266 29.8212   4
   4 -11   0 10.4997 18.0523   1
   4  11   0 48.4271 35.4676   8
   4  11   0 38.8481 33.8983   7
  -4  11   0 13.6277 26.1629  15
  -4  11  -1 3.49645 25.8548  15
   4  11   1 50.0964 39.1720   8
  -4 -11  -1 24.0348 29.7810   4
   4 -11   1 36.3654 21.0633   1
   4  11   1 13.0325 24.1931  11
   4  11   1 24.4060 33.8050   7
  -4  11  -2 104.789 34.3008  15
   4  11   2 80.8176 38.7714   8
  -4 -11  -2 91.4907 38.0489   4
   4  11   2 108.451 33.5513  11
   4  11   2 100.554 43.1958   7
  -4  11  -3 100.501 36.9903  15
   4  11   3 99.8592 38.6499   8
  -4 -11  -3 76.0475 33.8641   4
   4  11   3 126.345 46.5942   7
   4  11   3 36.5635 26.9075  11
  -4 -11  -4 295.927 53.8442   4
   4  11   4 271.466 49.8746  11
  -4  12   4-7.37068 39.0477   7
   4 -12  -4-3.70837 20.8790  12
  -4 -12   3 7.10328 38.2440   4
  -4  12   3 7.02433 33.4312   7
   4 -12  -3 14.5542 22.1900  12
  -4 -12   2 6.89516 32.1636   4
   4 -12  -2 10.9000 22.1713  12
  -4  12   2 26.3114 33.1404   7
   4 -12  -1 220.332 38.1197   1
  -4 -12   1 147.147 50.7311   4
  -4  12   1 251.207 53.8952   7
  -4  12   1 323.656 44.4322  15
   4 -12   0 2.75452 21.1346   1
  -4 -12   0 32.1909 33.5540   4
  -4  12   0-3.27251 24.1224  15
   4 -12   1 379.190 56.5359   1
  -4  12  -1 457.445 60.8443  15
  -4 -12  -1 384.043 72.8279   4
  -4 -12  -2 11.7669 34.9750   4
  -4 -12  -3 55.4799 36.3600   4
   4  12   3 116.971 35.0950  11
  -4  13   2 114.669 30.7565  15
  -4  13   1 124.712 32.9967  15
  -5   0  14 302.429 48.6614   2
  -5   0  13 8.89462 19.8511   3
   5   0 -13-14.1681 17.0562   9
  -5   0  13 3.45233 20.7783   2
   5   0 -13-6.31193 17.7692  12
  -5   0  12 25.2262 22.0595   3
   5   0 -12 12.7558 14.7881   9
  -5   0  12 38.7467 21.8738   2
   5   0 -12 43.1641 18.5445  12
  -5   0  11-3.83311 17.8673   3
  -5   0  11-2.97754 15.2570   2
   5   0 -11 8.87885 14.6331   9
   5   0 -11 7.53136 15.1077  12
   5   0 -10 4123.70 365.399   9
  -5   0  10 4302.53 369.974   2
  -5   0  10 2988.73 368.299   3
   5   0 -10 3591.39 364.979  12
  -5   0   9 6.29240 15.2639   3
  -5   0   9-2.46356 12.6230   2
   5   0  -9 1.94577 9.44063  12
  -5   0   8 4484.93 392.262  11
  -5   0   8 4449.18 394.691   2
  -5   0   8 3331.92 394.317   3
   5   0  -8 3894.65 390.762  12
  -5   0   7 2.07726 4.88615   1
  -5   0   7-4.04218 9.22220   2
  -5   0   7-2.67447 9.85521   3
   5   0  -7 4.65581 8.48239  12
  -5   0   6 6009.87 476.090  11
  -5   0   6 4478.32 469.933   1
   5   0  -6 4724.91 475.865  10
   5   0  -6 5253.88 474.551  12
  -5   0   6 5090.46 476.414   2
  -5   0   5 1.55691 7.84447  11
   5   0  -5 5.09040 7.40463  10
   5   0  -5-11.4553 7.08591  12
   5   0  -5-1.55153 6.93090  11
  -5   0   5 1.82106 6.49035   2
   5   0  -4 24.6870 9.05304  10
  -5   0   4 32.7087 8.96696   8
   5   0  -4 38.7990 8.80094   9
   5   0  -4 32.9854 11.2290  11
   5   0  -4 26.1312 10.4969   2
   5   0  -3 2.01451 4.88659   9
  -5   0   3-1.45880 6.93970   8
   5   0  -3-1.86829 5.33266  10
   5   0  -3 2.01942 8.37488  11
   5   0  -3 4.90002 7.28893   2
   5   0  -2 1425.72 186.643  10
   5   0  -2 1795.02 186.634   2
   5   0  -2 2288.03 184.006   9
   5   0  -2 1986.64 191.218  11
   5   0  -2 2094.32 184.403   8
   5   0  -2 1510.41 186.198   6
   5   0  -1-5.15900 11.2477   6
   5   0  -1-2.07342 7.38290   8
   5   0  -1-1.06251 5.53923   9
  -5   0   1-1.65588 6.30380   9
   5   0  -1 2.23038 11.4286   2
  -5   0   0 10076.5 1043.64   9
  -5   0   0 12994.1 1045.20  14
   5   0   0 9545.18 1049.05   6
  -5   0  -1 3.64375 10.9788   5
  -5   0  -1 2.03822 7.77936   9
   5   0   1 12.9886 3.34223   7
   5   0   1-5.45268 7.36048   9
  -5   0  -1-1.53349 7.17203  14
  -5   0  -2 3925.42 382.528   9
  -5   0  -3 10.2539 11.1956   9
  -5   0  -3 1.31836 8.43929  15
   5   0   3 23.8558 16.3799  14
  -5   0  -4 553.898 59.3882  15
  -5   0  -4 553.364 66.3275   9
  -5   0  -5 3.30537 16.0358   9
  -5   0  -5-2.85252 9.30367  15
   5   0   5 9.45448 14.9173   3
  -5   0  -6 245.697 43.0623   9
   5   0   6 178.741 43.4938   3
  -5   0  -7-4.18390 16.4261   9
  -5   0  -7-11.8708 13.0250  15
   5   0   7 5.48663 19.5431   3
   5   0   8 1599.74 218.750   3
  -5   0  -8 2257.85 205.351  15
   5   0   9 6.34721 30.7982   3
   5  -1 -14 225.174 40.4758  12
  -5   1  14 165.528 34.8592   2
  -5  -1  14 207.372 41.5899   2
   5  -1 -13 855.623 98.6510  12
  -5  -1  13 1058.90 104.740   2
  -5   1  13 1187.15 101.822   2
   5  -1 -13 843.488 97.4815   9
   5  -1 -12 344.591 51.5355  12
   5   1 -12 331.925 48.9039  12
  -5  -1  12 568.185 59.8275   2
  -5  -1  12 268.000 54.1972   3
  -5   1  12 507.374 54.4304   2
   5  -1 -12 428.307 53.7017   9
   5   1 -12 384.062 48.3879   9
   5  -1 -11 2075.59 214.295  12
   5   1 -11 2067.42 212.033  12
  -5  -1  11 2663.02 220.576   2
  -5   1  11 2331.64 215.513   2
   5   1 -11 2300.85 211.110   9
  -5  -1  10 404.997 52.3980   2
  -5   1  10 421.766 49.7969   2
  -5  -1  10 467.148 50.9177   4
  -5  -1  10 286.504 50.0001   3
   5   1 -10 408.026 47.1842  12
   5  -1 -10 374.888 48.6039  12
   5   1 -10 387.433 45.3017   9
  -5  -1   9 406.869 45.0867   2
  -5   1   9 399.305 42.3924   2
   5   1  -9 297.938 36.1503   9
  -5  -1   9 238.410 42.2875   3
   5   1  -9 290.955 37.7749  12
   5  -1  -9 307.648 40.6312  12
   5   1  -8 18.4855 7.55131   9
  -5   1   8 12.1130 9.99540   2
  -5  -1   8-2.44638 11.6504   2
  -5  -1   8 5.46788 7.15369   1
  -5  -1   8-2.96089 11.9641   3
   5  -1  -8 2.07082 9.66738  12
   5   1  -8 5.69380 7.56003  12
  -5   1   8-1.38616 8.76496  11
  -5  -1   7 224.299 25.1107   1
  -5  -1   7 195.192 31.4340   3
  -5   1   7 193.032 28.1690   2
  -5  -1   7 192.496 30.0000   2
   5   1  -7 193.264 25.0725  12
   5  -1  -7 261.114 29.8315  12
  -5  -1   7 154.611 27.4740  11
  -5   1   7 212.357 25.6857  11
  -5   1   6 933.893 86.2909  11
   5  -1  -6 788.836 88.1523  10
  -5  -1   6 804.507 85.2822   1
   5  -1  -6 849.917 88.7023  12
   5   1  -6 883.057 85.2917  12
  -5   1   6 776.221 87.7386   2
   5   1  -5 5867.32 650.077  11
   5  -1  -5 6405.39 649.168  10
   5   1  -5 7927.25 645.570   9
  -5   1   5 6336.91 642.798   1
   5   1  -5 7406.83 646.968  12
   5  -1  -5 7237.40 651.637  12
  -5   1   5 7493.23 651.476   2
   5  -1  -4 1954.65 202.436  10
  -5  -1   4 2415.93 204.840  10
  -5   1   4 2384.09 199.765   8
  -5  -1   4 2251.53 203.337   8
   5   1  -4 2234.53 197.484   9
  -5  -1   4 1821.03 202.943  11
   5   1  -4 1648.17 203.083  11
   5  -1  -4 1773.71 200.219  11
   5  -1  -4 1768.32 201.554   2
   5  -1  -3 5518.98 636.812  10
   5  -1  -3 7705.93 637.683   9
   5   1  -3 6974.52 632.341   9
  -5  -1   3 7375.30 639.939   8
   5  -1  -3 5836.16 636.897   2
   5   1  -3 6324.51 637.092   2
   5  -1  -3 6948.83 638.705  11
   5   1  -3 6349.14 640.393  11
   5  -1  -2 463.060 57.4589  10
   5   1  -2 531.855 51.9478   9
   5  -1  -2 564.498 56.0214   9
  -5  -1   2 493.880 54.4266   9
   5  -1  -2 444.013 57.2770   2
   5   1  -2 482.638 56.3876   8
  -5  -1   2 616.805 54.8606   7
   5   1  -2 430.264 57.5340   6
   5  -1  -2 432.011 55.6358   6
   5   1  -2 648.294 63.4014  11
   5  -1  -1 2635.46 309.043   2
  -5  -1   1 3461.41 305.719   9
   5   1  -1 4070.01 303.459   9
  -5   1   1 3088.04 307.527   9
   5   1  -1 2545.61 308.756   6
   5  -1  -1 2642.95 308.138   6
  -5   1   1 3001.14 310.279  14
   5   1  -1 2833.13 309.873   8
   5  -1  -1 3245.11 305.069   8
   5   1  -1 2955.57 306.518   2
  -5  -1   0 14.3094 11.3723   3
  -5  -1   0 16.8478 12.0209   5
  -5   1   0 8.30639 8.41889   9
   5   1   0 4.51793 9.64360   2
  -5  -1   0 1.59683 6.31301   9
   5  -1   0 15.4748 8.06901   9
   5   1   0-3.26161 11.2161   6
   5  -1   0 12.5294 11.9465   6
  -5  -1   0 11.2872 7.51498  14
  -5   1   0 11.9493 9.12099  14
   5   1   1 68.1050 12.9603  12
  -5  -1  -1 81.1551 15.9019   9
  -5  -1  -1 108.245 23.4000   5
   5   1   1 81.5492 14.2856   7
  -5   1  -1 113.328 19.0302   9
  -5  -1  -1 72.3244 13.2853  14
  -5   1  -1 111.118 17.7650  14
  -5   1  -2 43.0881 14.3976   9
  -5  -1  -2 53.7626 13.7352   9
  -5   1  -3 2919.95 269.199  15
  -5  -1  -3 2841.63 265.386  15
  -5   1  -3 2656.20 273.652   9
  -5  -1  -3 2431.89 271.253   9
  -5  -1  -4 932.532 112.324   9
  -5   1  -4 1024.85 114.868   9
   5   1   4 1158.49 110.596  14
  -5  -1  -4 1030.25 105.037  15
  -5   1  -4 1128.29 108.984  15
   5  -1   5 3520.25 437.956   3
  -5   1  -5 4696.71 429.010  15
  -5  -1  -5 4642.37 425.643  15
  -5   1  -5 4411.75 437.004   9
  -5  -1  -5 4269.47 435.356   9
  -5  -1  -6 307.694 46.8380   9
  -5   1  -6 310.573 49.0624   9
   5  -1   6 216.167 48.4484   3
  -5   1  -6 359.554 41.7656  15
  -5  -1  -6 370.041 38.6288  15
   5  -1   7 1412.78 165.065   3
  -5  -1  -7 1401.17 159.176   9
  -5   1  -7 1501.97 149.765  15
  -5  -1  -7 1509.94 147.193  15
  -5  -1  -8 74.7742 25.4958   9
  -5   1  -8 75.2210 21.1402  15
   5  -1   8 29.4142 29.1833   3
   5  -1   9-6.29066 28.1155   3
  -5   1  -9 18.6845 19.9359  15
  -5   1  -9 47.9811 30.4732   9
   5  -2 -14 131.295 35.5101   9
   5  -2 -13 74.8805 27.4379  12
   5  -2 -13 91.5216 28.4095   9
  -5   2  13 71.3743 27.2226   3
  -5  -2  13 71.4733 28.5237   3
  -5   2  13 77.0599 22.4134   2
  -5  -2  13 87.4949 31.0859   2
  -5   2  12-2.50268 15.0669   2
  -5  -2  12-4.24712 20.2095   3
  -5   2  12-7.99632 20.1341   3
   5  -2 -12-6.69294 18.2963  12
   5   2 -11 241.840 28.5458   9
   5  -2 -11 200.849 33.1488  12
  -5   2  11 193.371 30.1983   2
  -5  -2  11 185.566 37.0824   3
  -5   2  11 134.755 33.0354   3
  -5  -2  10 1716.08 146.113   4
   5   2 -10 1419.27 134.830   9
   5  -2 -10 1288.51 141.171  12
   5   2 -10 1328.44 136.133  12
  -5  -2  10 1269.46 144.182   3
  -5   2  10 1106.21 141.164   3
  -5   2  10 1365.12 138.376   2
  -5   2   9 1514.05 132.587   2
  -5  -2   9 1768.42 140.360   2
   5   2  -9 1594.48 127.570   9
  -5  -2   9 1329.16 128.888   1
  -5  -2   9 1302.33 137.011   3
  -5   2   9 1271.76 135.508   3
   5  -2  -9 1412.88 135.180  12
   5   2  -9 1671.83 130.470  12
  -5  -2   8 1302.52 114.855   2
  -5   2   8 1074.60 108.291   2
   5   2  -8 1296.74 103.651   9
  -5   2   8 707.723 102.220  11
  -5  -2   8 1159.55 107.085   1
  -5  -2   8 922.866 112.010   3
  -5   2   8 1023.39 112.158   3
   5   2  -8 1222.76 105.888  12
   5  -2  -8 1167.16 111.895  12
  -5   2   7 2498.95 171.960   2
   5   2  -7 2432.97 162.685   9
  -5  -2   7 2406.03 170.055   1
  -5  -2   7 1880.33 174.282   3
  -5   2   7 2232.43 175.669   3
   5   2  -7 2261.59 165.553  12
   5  -2  -7 2062.39 173.401  12
  -5  -2   6 3082.40 319.026   1
   5  -2  -6 3226.85 319.915  10
   5   2  -6 3160.08 320.425  10
   5  -2  -6 3026.68 321.345  12
   5   2  -6 3429.62 314.917  12
  -5   2   6 3641.43 320.708   2
   5   2  -5 939.156 116.371  11
  -5  -2   5 1398.05 118.963  11
  -5  -2   5 1177.49 116.282   2
   5   2  -5 1061.96 114.201  10
   5  -2  -5 972.128 113.247  10
  -5   2   5 1124.56 115.684   2
  -5  -2   5 1358.41 117.817   8
   5   2  -5 1128.84 109.212  12
   5  -2  -4 12.0382 6.45202  11
   5   2  -4-2.57052 10.7556  11
   5   2  -4 39.1111 6.05401  12
   5   2  -4 14.0884 7.80992  10
   5  -2  -4 6.47943 7.03884  10
  -5  -2   4 2.21515 10.8409  11
  -5   2   4 13.1717 10.2275  10
  -5  -2   4 1.07326 6.92238  15
   5  -2  -4 3.19241 8.30211   2
  -5  -2   4 17.4051 9.12642   2
  -5   2   4 22.8853 9.72702   6
   5   2  -3 19.1962 7.99381  10
   5  -2  -3 5.24074 6.03620  10
  -5   2   3 21.1301 11.0350   6
  -5  -2   3 5.70712 6.26272   7
   5  -2  -3 7.20008 8.42107   2
  -5  -2   3 24.5840 9.77259   2
  -5   2   3 5.87688 2.57317   1
  -5  -2   3 9.48592 10.1163   8
   5   2  -3 2.55605 9.12802  11
   5   2  -2 891.479 87.0161  11
   5  -2  -2 632.424 80.0421  10
   5   2  -2 719.660 82.1721  10
  -5  -2   2 856.200 77.4775   9
   5  -2  -2 595.301 80.7207   2
  -5  -2   2 836.537 84.5025   2
   5   2  -2 670.224 82.2421   8
   5  -2  -2 709.510 78.8571   6
  -5  -2   2 1031.41 82.5961   7
   5   2  -2 742.320 79.3905   2
   5   2  -1 3344.99 316.745  11
   5   2  -1 2738.55 314.854   8
   5  -2  -1 3932.16 311.674   9
  -5  -2   1 3108.58 306.677   9
  -5   2   1 4617.16 319.002  14
  -5   2   1 3974.49 321.149   5
   5  -2  -1 2049.62 307.919   6
   5   2  -1 3001.98 313.660   6
  -5  -2   1 3745.05 317.746   5
   5   2  -1 3097.91 308.667   2
  -5   2   0 6805.50 572.531  14
  -5  -2   0 6700.22 565.318  14
   5   2   0 5195.79 567.385   2
  -5   2   0 7127.12 580.865   5
  -5  -2   0 6190.14 575.904   5
   5  -2   0 6490.61 568.628   9
  -5   2   0 4821.02 569.147   9
  -5  -2   0 5165.72 565.571   9
   5   2   0 5038.32 576.856   8
   5   2   0 6280.88 567.467   7
  -5  -2   0 6417.12 571.351   3
  -5   2   0 7328.01 575.300   3
   5   2   0 5802.58 563.170  12
   5  -2   0 4654.94 570.842   6
   5   2   1 3839.74 441.058   7
   5   2   1 4013.01 441.796   2
  -5   2  -1 4497.08 444.321   9
  -5  -2  -1 4729.22 440.803   9
  -5   2  -1 5630.36 445.300  14
  -5  -2  -1 4739.83 435.863  14
  -5   2  -2 2180.41 216.673   9
  -5  -2  -2 2039.71 212.542   9
  -5   2  -2 2363.31 214.110  14
  -5  -2  -2 2106.87 205.848  15
   5  -2   3 1408.58 130.297   7
  -5  -2  -3 1213.44 137.362   9
  -5   2  -3 1223.66 140.394   9
  -5  -2  -3 1330.88 129.650  15
  -5   2  -3 1355.96 136.952  15
  -5   2  -4 353.421 49.4860   9
  -5  -2  -4 378.283 47.9263   9
  -5  -2  -4 344.860 37.9049  15
  -5   2  -4 408.862 45.5922  15
   5   2   5-1.72574 10.8924  14
  -5  -2  -5-6.55051 15.2668   9
  -5   2  -5 2.11680 13.2075  15
  -5  -2  -5-0.87285 7.38298  15
  -5  -2  -6 190.218 34.2584   9
  -5   2  -6 268.100 31.9717  15
  -5  -2  -6 157.642 22.7806  15
   5  -2   6 133.423 35.8730   3
   5   2   6 207.338 40.6712   3
   5   2   7 814.120 97.2211   3
   5  -2   7 512.618 87.9954   3
  -5   2  -7 823.503 81.6514  15
  -5  -2  -7 735.789 88.9259   9
   5   2   8 776.302 113.011   3
   5  -2   8 646.077 109.787   3
  -5   2  -8 906.430 111.592   9
  -5  -2  -8 888.133 109.375   9
   5   2   9 841.303 126.833   3
   5  -2   9 976.048 128.784   3
  -5   2  -9 1292.05 117.229  15
  -5   2  -9 1122.36 128.713   9
  -5  -2  -9 965.501 124.334   9
   5  -3 -14 484.362 68.0927   9
  -5   3  13 24.0793 22.6783   3
  -5  -3  13 8.77981 22.5814   3
  -5   3  13 25.0680 16.7749   2
   5  -3 -13 23.6952 21.6776  12
  -5  -3  12 1310.07 152.241   3
  -5   3  12 1426.67 151.511   3
   5  -3 -12 1363.73 150.902  12
  -5   3  12 1483.63 144.681   2
  -5  -3  11 381.504 57.1684   3
  -5   3  11 339.415 55.1605   3
  -5   3  11 535.013 52.6738   2
   5  -3 -11 418.914 56.2250  12
  -5  -3  10 1646.15 148.011   4
   5   3 -10 1428.78 131.745   9
  -5   3  10 1406.19 135.184   2
  -5  -3  10 1201.96 140.835   3
  -5   3  10 1089.76 138.240   3
  -5  -3  10 1295.13 134.685   1
   5  -3 -10 1189.72 139.330  12
  -5   3   9-2.39571 4.47002  11
  -5  -3   9 29.9053 18.9777   4
   5   3  -9 12.5030 6.82350   9
  -5  -3   9 25.1442 16.1145   3
  -5   3   9 5.76076 13.1562   3
  -5   3   9 17.9904 11.2398   2
  -5  -3   9 13.2450 11.4012   1
   5  -3  -9 23.4647 15.5488  12
   5   3  -8 18.4895 5.64423   9
  -5  -3   8 28.9296 15.2051   3
  -5   3   8 13.2171 14.7979   3
  -5   3   8 22.3506 10.7842   2
  -5  -3   8 23.3877 12.0372   1
   5  -3  -8 33.1138 14.5157  12
  -5  -3   7 56.6391 18.1065   3
  -5   3   7 34.3334 14.5322   3
   5  -3  -7 68.6839 18.4679  12
  -5  -3   7 72.3839 16.0027   1
  -5   3   7 64.5775 14.2299   2
  -5  -3   7 67.1231 16.8796   2
   5  -3  -6 1786.51 185.179  12
  -5   3   6 1814.16 181.729   2
  -5  -3   6 1881.55 184.635   2
   5   3  -5 984.919 117.454  11
   5  -3  -5 1030.44 111.999  10
   5   3  -5 1169.31 113.511  10
  -5   3   5 1193.74 112.946   6
  -5  -3   5 1188.77 115.855   2
   5  -3  -5 1076.43 111.891   2
   5   3  -4 5966.07 553.017  11
   5  -3  -4 4640.91 539.664  11
  -5   3   4 6594.71 548.581  10
  -5  -3   4 6598.52 547.271  10
   5  -3  -4 5770.57 545.262  10
   5   3  -4 6090.02 546.652  10
  -5  -3   4 5523.47 542.002  15
  -5  -3   4 6842.50 548.237   7
  -5  -3   4 6800.26 552.594   8
  -5  -3   4 6532.05 552.217   6
  -5   3   4 6618.51 547.252   6
   5  -3  -4 5111.12 544.637   2
  -5  -3   4 6148.86 548.298   2
   5   3  -3 255.497 35.7572  11
   5  -3  -3 227.585 29.4924  10
   5   3  -3 278.382 31.6905  10
  -5  -3   3 212.808 24.2666   9
  -5  -3   3 252.440 26.4641  15
  -5  -3   3 247.689 35.7274   8
  -5  -3   3 237.353 31.7085   2
   5  -3  -3 180.812 29.2006   2
  -5  -3   3 260.107 35.4201   6
  -5   3   3 297.038 33.2948   6
  -5  -3   2 6625.31 504.249   2
  -5   3   2 5125.45 492.074   1
   5  -3  -2 3992.61 498.943   2
  -5   3   2 4344.74 503.061  14
   5   3  -2 5511.99 490.986  12
   5   3  -2 5740.75 505.336  11
   5   3  -2 5544.04 501.002  10
   5  -3  -2 4619.72 497.725  10
   5  -3  -2 6956.14 503.776   9
  -5  -3   2 5224.50 493.471   9
  -5  -3   2 4402.13 492.572  15
   5   3  -2 5886.72 497.867   2
   5   3  -2 3985.48 501.543   8
   5  -3  -2 5016.34 495.395   6
  -5  -3   2 6068.47 508.588   6
   5   3  -1 417.895 56.9094   8
  -5   3   1 406.499 43.5312   1
  -5   3   1 640.345 57.2495  14
   5   3  -1 475.815 42.8871  12
   5   3  -1 463.967 56.0613  11
   5   3  -1 317.614 49.6859  10
   5  -3  -1 273.908 47.1978  10
  -5  -3   1 472.167 46.0061   9
   5   3  -1 434.365 47.4841   2
  -5  -3   1 476.339 60.4022   6
  -5  -3   1 448.904 53.8524   5
  -5   3   1 608.190 61.0337   5
   5  -3  -1 327.827 47.4768   6
  -5   3   1 401.598 44.7671   7
  -5   3   0 453.758 51.7477   1
  -5   3   0 594.811 61.8130  14
  -5  -3   0 546.743 51.5516  14
   5   3   0 497.854 51.0594  12
   5   3   0 491.764 63.4574  11
  -5   3   0 542.657 65.2326   5
  -5  -3   0 551.414 62.3429   5
  -5  -3   0 499.632 54.6327   9
   5   3   0 451.223 54.4988   2
  -5  -3   0 515.661 58.1903   3
  -5   3   0 556.600 61.6203   3
   5  -3   0 436.517 59.8597   6
   5   3   0 498.981 67.7420   8
   5   3   0 509.901 58.8851   7
   5   3   1 1.82049 8.31003   2
  -5   3  -1-2.51679 12.8971  14
   5   3   1 6.21720 11.4571   7
  -5  -3  -1-3.61896 8.07842   9
  -5   3  -2 1166.11 123.999   9
  -5  -3  -2 1065.05 119.160   9
  -5  -3  -2 1152.69 110.908  15
  -5   3  -2 1300.79 122.456  14
  -5  -3  -3 209.564 22.8300  15
  -5   3  -3 252.018 34.0555  15
  -5   3  -3 234.063 35.6849   9
  -5  -3  -3 232.992 33.1734   9
   5  -3   3 238.224 27.4654   7
  -5  -3  -4 3136.52 306.787  15
  -5   3  -4 3777.98 318.203  15
  -5  -3  -4 3136.32 318.665   9
  -5  -3  -5 610.911 64.5213  15
  -5  -3  -5 626.458 77.0207   9
  -5   3  -6 2878.34 254.478  15
  -5  -3  -6 2154.14 256.335   9
  -5  -3  -7 189.087 39.8458   9
  -5   3  -7 323.134 49.6319   9
   5   3   7 176.324 44.1239   3
   5  -3   7 187.770 43.2691   3
  -5   3  -7 345.745 41.0704  15
  -5  -3  -8 334.721 57.0891   9
  -5   3  -8 402.307 61.6375   9
   5   3   8 275.862 60.0894   3
   5  -3   8 355.418 62.8968   3
  -5   3  -8 525.512 55.3180  15
  -5   3  -9-11.0492 27.8135   9
   5  -3   9-18.1323 31.4969   3
  -5   3  -9 29.9219 23.3025  15
  -5   4  13 27.3067 21.9139   3
  -5  -4  13 21.8596 23.7808   3
   5  -4 -13 67.0492 26.0674  12
  -5  -4  12-16.0705 23.5771   3
  -5   4  12-10.7886 19.6717   3
   5  -4 -12 3.93875 18.7545  12
  -5  -4  11 251.000 43.3352   3
  -5   4  11 260.630 35.2472   2
   5  -4 -11 268.569 42.9453  12
  -5   4  11 320.768 43.7577   3
   5  -4 -10 198.690 37.3396  12
  -5   4  10 229.386 31.7656   2
  -5  -4  10 247.482 39.5236   3
  -5   4  10 225.369 36.9608   3
  -5  -4  10 249.021 35.1962   1
  -5  -4  10 325.968 48.8132   4
  -5  -4   9 2214.88 260.426   3
  -5   4   9 2332.11 259.708   3
  -5   4   9 2584.96 256.054   2
   5  -4  -9 2331.04 261.936  12
  -5  -4   9 3148.12 261.397   1
  -5   4   8 153.602 21.0963   2
  -5  -4   8 102.759 22.5442   1
  -5  -4   8 106.942 23.2614   3
  -5   4   8 55.3485 20.5369   3
   5  -4  -8 123.448 23.7999  12
  -5  -4   7 4300.96 402.882   1
  -5   4   7 4083.91 398.317   2
   5  -4  -7 3858.14 403.225  12
  -5  -4   7 3993.00 402.369   3
  -5   4   7 3986.01 400.758   3
  -5  -4   7 4593.11 404.664   2
   5  -4  -6 31.8027 14.6617  12
  -5  -4   6 32.2599 13.6768   2
  -5  -4   6 7.19601 11.3182   3
  -5   4   6 12.6866 11.6901   3
   5  -4  -5 1088.79 106.707  10
   5   4  -5 1077.41 107.788  10
  -5  -4   5 1043.56 110.241   2
   5  -4  -5 977.207 105.442   2
  -5   4   5 1060.05 105.870   6
  -5  -4   4 322.807 39.8912   6
  -5   4   4 331.551 33.9785   6
   5   4  -4 283.963 33.6003  10
   5  -4  -4 243.473 31.6651  10
   5   4  -4 261.117 39.6150  11
  -5   4   4 257.204 28.3834   8
  -5  -4   4 282.248 29.8066  15
  -5  -4   4 249.413 34.3879   2
   5  -4  -4 231.408 32.2481   2
  -5  -4   3 766.695 75.7292   6
   5   4  -3 706.805 75.9582  11
   5  -4  -3 639.759 66.8896  10
   5   4  -3 738.963 69.3984  10
  -5  -4   3 641.350 60.9213   9
  -5  -4   3 560.085 61.9826  15
  -5  -4   3 693.033 69.9037   2
   5  -4  -3 469.232 66.4494   2
  -5  -4   2 14.0222 15.6691   6
   5   4  -2 6.16077 3.08245  12
   5   4  -2 19.4193 13.4520  11
   5   4  -2 2.04000 9.35073  10
   5  -4  -2 6.70843 7.70404  10
  -5  -4   2 11.4461 10.9264   2
   5  -4  -2 17.6922 13.4182   2
   5   4  -2 3.79262 12.0007   8
  -5  -4   2 8.24365 4.78942   9
  -5  -4   2 22.6003 5.37013  15
  -5   4   2 15.1506 13.8546  14
   5   4  -1 4807.67 428.730   2
  -5  -4   1 4155.69 422.684  15
   5   4  -1 4430.09 434.276   7
   5   4  -1 3662.71 439.686   8
  -5   4   1 4258.80 425.548   1
  -5   4   1 6615.33 441.719  14
   5   4  -1 4871.25 423.804  12
   5   4  -1 5325.39 440.370  11
   5  -4  -1 4136.70 430.360  10
   5   4  -1 4448.06 433.769  10
  -5  -4   1 4150.99 426.657   9
  -5  -4   1 4786.14 444.641   6
   5  -4  -1 3905.88 427.978   6
  -5   4   1 4359.64 428.991   7
  -5  -4   1 5167.41 436.580   5
  -5   4   1 5159.14 440.724   5
  -5  -4   0 155.848 17.3769  14
   5   4   0 200.810 20.0514  12
  -5   4   0 200.889 32.7788   5
  -5  -4   0 181.815 28.3257   5
  -5   4   0 175.730 21.2912   1
  -5  -4   0 170.474 22.9431   9
   5   4   0 195.691 23.1900   2
  -5  -4   0 131.325 25.1133   3
  -5   4   0 184.596 29.9304   3
   5   4   0 161.465 36.7081   8
   5  -4   0 133.804 26.8566   6
   5   4   0 106.539 26.1888   7
  -5  -4   0 158.261 16.5054  15
  -5  -4  -1 3144.47 321.091   9
   5   4   1 3256.81 340.411   8
   5   4   1 3295.19 319.360   2
   5   4   1 2626.15 327.565   7
   5   4   2 241.218 38.4451  11
  -5   4  -2 196.980 34.1850   9
  -5  -4  -2 200.075 30.3567   9
  -5  -4  -3 2557.63 291.573   9
  -5   4  -3 3580.66 297.388  15
  -5  -4  -4 28.0842 15.5878   9
  -5   4  -4 57.7007 19.7401  15
  -5  -4  -5 113.388 26.9852   9
  -5   4  -5 87.8331 27.0523   9
  -5   4  -5 159.421 28.4659  15
  -5  -4  -6 11.9495 17.5496   9
  -5   4  -6 43.4425 22.0166   9
  -5   4  -6 32.2516 19.8864  15
  -5   4  -7 739.743 95.7175   9
  -5  -4  -7 626.165 91.7169   9
  -5  -4  -8 9.87831 21.0182   9
  -5   4  -8 15.3007 25.2163   9
  -5   4  -8-9.47221 23.6560  15
  -5   4  -9 1851.80 192.096  15
   5  -5 -12 1047.51 124.383  12
  -5   5  12 1095.36 121.163   3
  -5  -5  12 1165.45 124.052   3
  -5  -5  11 307.239 47.2141   3
  -5   5  11 232.288 41.5158   3
   5  -5 -11 252.306 44.9677  12
  -5  -5  11 355.000 44.3704   1
  -5  -5  10 341.153 46.6599   3
  -5   5  10 362.810 46.0014   3
  -5  -5  10 411.043 46.9659   1
  -5   5  10 270.173 37.9176   2
   5  -5 -10 206.340 43.9740  12
  -5  -5  10 416.876 57.8139   4
  -5  -5   9 275.690 45.9685   4
   5  -5  -9 129.674 30.4292  12
  -5   5   9 161.457 29.4834   3
  -5  -5   9 212.849 33.1297   3
  -5   5   9 158.437 25.6075   2
  -5  -5   9 265.395 36.0846   1
  -5  -5   8-4.53655 19.3117   4
  -5  -5   8-2.95079 15.6426   1
   5  -5  -8 6.78597 14.4491  12
  -5  -5   8-2.69753 14.3020   3
  -5   5   8 30.8865 13.9472   3
  -5  -5   7 263.917 39.0679   2
  -5  -5   7 292.043 38.7529   3
  -5   5   7 236.205 35.6060   3
  -5  -5   7 264.880 41.3192   1
  -5  -5   6 1645.77 147.071   2
  -5  -5   6 1706.66 152.963   4
  -5   5   6 1421.07 138.129   6
  -5  -5   6 1231.50 142.893   3
  -5   5   6 1221.75 140.782   3
   5  -5  -5 190.146 29.0295   2
  -5  -5   5 310.518 36.8822   2
  -5   5   5 230.480 31.4048   8
  -5  -5   5 309.117 38.8372   6
  -5   5   5 263.181 29.9028   6
   5   5  -5 302.048 32.6784  10
   5  -5  -5 235.974 30.4295  10
  -5  -5   4 3186.53 289.839   6
   5   5  -4 2831.83 291.910  11
   5   5  -4 3215.12 281.770  10
   5  -5  -4 2868.34 279.892  10
  -5  -5   4 2870.27 281.372  13
  -5   5   4 3006.13 277.677   8
  -5  -5   4 3301.42 285.990   2
   5  -5  -4 2645.69 280.365   2
  -5  -5   4 2634.76 277.310  15
  -5  -5   3 1233.49 131.775  15
  -5  -5   3 1563.66 146.943   6
   5   5  -3 1515.43 149.082  11
   5  -5  -3 1475.99 135.958  10
   5   5  -3 1749.02 138.601  10
  -5  -5   3 1338.47 131.323   9
  -5   5   3 1789.44 152.092  14
   5  -5  -3 955.029 136.411   2
  -5  -5   3 1545.11 140.505   2
  -5  -5   2 3125.78 302.939   5
  -5  -5   2 3609.04 311.899   6
   5   5  -2 3438.69 311.246  11
   5   5  -2 3740.24 301.963  10
   5  -5  -2 2992.89 298.027  10
  -5  -5   2 3021.27 295.596   9
   5   5  -2 2736.11 310.193   8
  -5  -5   2 3744.22 304.641   2
  -5  -5   2 2814.68 293.217  15
  -5   5   1 182.044 28.1519   7
   5   5  -1 143.221 29.8408   7
   5  -5  -1 204.896 23.9103   6
  -5  -5   1 148.475 34.6622   6
  -5  -5   1 158.399 28.1602   5
  -5   5   1 281.510 36.4949   5
   5   5  -1 186.291 29.0687  10
   5  -5  -1 192.269 26.9255  10
  -5  -5   1 179.481 23.7805   9
  -5   5   1 283.400 33.5857   3
   5   5  -1 168.769 37.0197   8
  -5  -5   1 135.016 25.6212   3
  -5  -5   1 187.251 19.3359  15
  -5   5   0 374.139 43.8078  14
   5   5   0 317.702 30.2263  12
   5   5   0 302.543 32.5532   2
   5  -5   0 285.381 30.9904   8
   5   5   0 224.661 45.8418   8
  -5  -5   0 237.518 33.1897   3
  -5   5   0 269.890 39.1067   3
   5  -5   0 234.277 34.9623   6
   5   5   0 165.546 37.5733   7
  -5  -5   0 215.545 32.0617   9
  -5   5   0 260.712 40.7570   5
  -5  -5   0 248.324 36.4327   5
   5   5   1 136.196 28.6733  11
  -5   5  -1 184.911 30.9076  14
   5   5   1 102.803 28.2970   7
   5   5   1 117.939 18.8079   2
  -5  -5  -1 125.873 21.7058   9
   5   5   1 155.571 36.6094   8
   5   5   2 884.338 115.670   8
   5   5   2 972.311 105.559  11
  -5  -5  -2 872.089 97.0691   9
   5   5   3 549.213 68.6013  11
  -5  -5  -3 449.197 60.4203   9
  -5   5  -3 578.037 65.1394  15
  -5  -5  -4 1589.15 189.022   9
  -5   5  -4 1635.36 192.688   9
  -5   5  -4 2239.96 193.491  15
   5   5   4 1745.51 195.426  11
  -5  -5  -4 2074.25 189.037   4
  -5  -5  -5 107.141 27.2785   9
  -5   5  -5 119.830 29.4280  15
  -5   5  -5 143.275 32.8579   9
  -5  -5  -5 172.789 27.8653   4
  -5  -5  -6 1478.04 174.016   9
  -5   5  -6 1503.92 176.242   9
  -5   5  -6 1958.57 175.106  15
  -5   5  -7 111.882 31.9366   9
  -5   5  -7 135.934 31.7635  15
  -5  -5  -7 101.587 30.5118   9
  -5   5  -8 312.839 55.8540   9
  -5  -5  -8 278.853 52.8426   9
  -5   5  -8 389.143 53.6656  15
  -5   6  12 35.4230 21.7412   3
  -5  -6  12 40.8138 25.2149   3
   5  -6 -11 42.5067 23.3874  12
  -5   6  11 41.3888 21.4055   3
  -5  -6  11 3.38750 21.0597   3
  -5  -6  11 38.1889 21.7898   1
  -5  -6  10 113.712 36.5968   4
  -5  -6  10 109.072 26.7062   1
   5  -6 -10 72.0730 26.5496  12
  -5  -6  10 60.0780 21.4262   3
  -5   6  10 63.6513 20.6442   3
  -5  -6   9 1278.35 134.918   4
  -5  -6   9 1106.05 119.717   3
  -5   6   9 980.808 116.401   3
  -5  -6   9 1266.50 123.959   1
  -5  -6   8 1618.81 184.480   3
  -5   6   8 1699.45 183.689   3
  -5  -6   8 2262.40 204.753   4
  -5  -6   8 1987.52 191.658   2
  -5  -6   8 2050.20 192.378   1
  -5  -6   7 1057.10 116.087   3
  -5   6   7 1016.12 114.359   3
  -5  -6   7 1250.22 126.060   1
  -5  -6   7 1270.76 132.695   4
  -5  -6   7 1186.14 121.195   2
  -5  -6   6 945.890 89.3854   2
  -5  -6   6 964.893 97.5490   4
  -5  -6   6 744.139 84.1801   3
  -5   6   6 729.661 82.0898   3
  -5   6   6 664.696 83.5450   8
  -5   6   6 856.749 78.3784   6
   5  -6  -6 580.368 86.2437  12
  -5  -6   5 177.730 29.4049   2
  -5  -6   5 163.499 27.0337   3
  -5   6   5 137.990 24.6903   3
   5  -6  -5 187.669 24.1597   2
  -5   6   5 208.580 26.8637   8
  -5  -6   5 231.728 34.4061   6
  -5  -6   5 215.377 37.0370   4
  -5   6   4 281.137 30.8335   8
   5   6  -4 207.204 41.7879  11
   5   6  -4 264.799 31.8220  10
   5  -6  -4 254.992 30.8788  10
  -5  -6   4 311.545 40.3554   6
  -5   6   4 249.108 31.3024  13
  -5   6   4 326.994 45.1329  14
  -5  -6   4 250.439 32.5588  13
  -5  -6   4 276.279 36.3132   2
   5  -6  -4 242.395 31.8577   2
  -5  -6   4 353.082 45.7158   4
  -5   6   3 144.687 26.9336  14
   5   6  -3 145.550 28.7204  11
   5  -6  -3 74.7439 13.1186  11
   5  -6  -3 111.147 15.6347  10
   5   6  -3 104.136 15.9781  10
  -5  -6   3 78.9926 12.5382  15
  -5  -6   3 112.347 25.7839   4
  -5  -6   3 121.438 25.9384   6
  -5  -6   3 76.4946 18.4806   2
   5  -6  -3 71.0485 17.5627   2
  -5  -6   2 1023.92 94.2003   6
  -5  -6   2 828.127 82.0427   5
   5  -6  -2 903.779 78.2955  10
   5   6  -2 965.877 80.7734  10
  -5  -6   2 558.389 72.4751  15
  -5   6   2 960.617 88.9604  14
  -5  -6   2 948.661 84.1971   2
   5   6  -2 698.303 91.6674   8
  -5   6   1 1624.04 141.709   5
  -5  -6   1 1343.65 134.713   5
   5   6  -1 1593.87 135.605  10
   5  -6  -1 1291.39 131.273  10
  -5  -6   1 1701.85 139.746   2
  -5  -6   1 1258.62 131.610   3
  -5   6   1 1828.79 138.933   3
   5  -6  -1 1353.85 127.398   6
  -5   6   1 1415.91 139.079   7
   5   6  -1 1249.58 149.347   8
   5   6  -1 1088.10 141.265   7
  -5  -6   1 1165.64 125.388  14
   5   6   0 1147.82 144.134   8
   5  -6   0 1306.51 124.683   8
   5   6   0 1135.27 137.920   7
  -5  -6   0 1146.13 123.638   3
  -5   6   0 1503.73 129.708   3
   5   6   0 1324.04 135.582  11
   5  -6   0 1233.51 124.585   6
   5  -6   0 1038.59 124.588  10
   5   6   0 1372.55 130.480  10
   5   6   1 1139.21 135.168  11
  -5  -6  -1 1360.20 134.437   4
   5   6   1 1313.49 124.414  12
  -5   6  -1 1596.97 138.224  14
   5   6   1 894.639 136.696   7
   5  -6   1 1242.01 125.387   8
   5   6   1 1029.72 144.600   8
   5   6   2 1634.34 172.634  11
  -5  -6  -2 2074.85 171.965   4
  -5  -6  -2 1466.95 165.612   9
   5   6   2 1415.22 178.858   7
   5   6   2 1607.44 159.254   2
   5   6   2 1592.60 186.395   8
  -5  -6  -3 678.638 95.7663   9
   5   6   3 772.611 115.003   8
   5   6   3 863.780 102.634  11
  -5  -6  -3 1023.19 100.465   4
   5   6   4 198.467 39.0940  11
  -5   6  -4 252.566 42.1447  15
  -5  -6  -4 184.118 35.8828   9
  -5  -6  -4 316.706 40.4014   4
   5   6   5-30.7368 23.6356  11
  -5  -6  -5 15.4230 17.2108   9
  -5   6  -5 7.23251 21.4899  15
  -5  -6  -5-3.13295 19.3214   4
  -5  -6  -6 160.329 35.7142   9
  -5   6  -6 172.019 39.2058   9
  -5   6  -6 212.462 38.8173  15
   5   6   6 136.014 37.7878  11
  -5  -6  -7 144.390 36.2599   9
   5   6   7 150.203 38.2350  11
  -5   6  -7 167.219 40.7819   9
  -5   6  -7 206.854 39.3874  15
   5   6   8 396.110 65.7501  11
  -5   6  -8 385.915 68.8485   9
  -5   7  12 107.807 27.2675   3
  -5  -7  12 92.8549 28.8049   3
  -5   7  11 431.055 55.7810   3
  -5  -7  11 407.615 57.6127   3
  -5  -7  11 492.536 62.4154   1
  -5  -7  10 10.9930 21.2116   1
  -5   7  10 7.48897 15.3991   3
  -5  -7  10 5.71903 17.6376   3
  -5  -7  10-12.5799 30.5181   4
  -5  -7   9 479.703 58.5832   3
  -5   7   9 396.552 54.5832   3
  -5  -7   9 500.461 75.6722   4
  -5  -7   9 609.244 67.6133   1
  -5  -7   8 64.3540 32.1773   4
  -5  -7   8 31.5059 27.2583   1
  -5  -7   8 52.8498 21.2417   2
   5  -7  -8 42.7762 21.8720  12
  -5  -7   8 30.8725 16.5326   3
  -5   7   8 31.1841 14.9743   3
  -5  -7   7 394.852 59.8662   4
  -5  -7   7 336.805 50.2948   1
  -5   7   7 236.962 39.9485   8
  -5  -7   7 289.227 38.2131   3
  -5   7   7 290.654 36.5728   3
  -5  -7   7 424.767 47.4978   2
   5  -7  -7 185.984 40.4272  12
   5  -7  -6 101.697 26.0270  12
  -5  -7   6 136.505 22.5563   3
  -5   7   6 105.821 20.1928   3
  -5  -7   6 141.317 26.6053   2
  -5  -7   6 154.485 36.1902   4
  -5   7   6 101.465 23.9083   8
  -5  -7   6 128.345 28.2682   6
   5  -7  -5 858.339 110.388  12
  -5  -7   5 1072.70 108.670   2
  -5   7   5 1041.05 104.785   8
  -5  -7   5 985.538 103.923   3
  -5   7   5 892.641 102.233   3
  -5  -7   5 1211.83 113.388   6
  -5  -7   5 1131.03 122.364   4
  -5   7   5 1079.15 113.409  14
  -5  -7   4 244.160 31.8112   2
  -5  -7   4 284.778 42.1439   4
  -5   7   4 148.136 23.7556  13
  -5   7   4 262.834 36.4521  14
  -5  -7   4 183.586 32.8064   6
   5   7  -3 3303.29 276.292  10
   5  -7  -3 2758.34 274.405  10
  -5  -7   3 2708.02 278.850   5
  -5  -7   3 3151.32 289.169   6
  -5  -7   3 2888.36 275.806  13
  -5   7   3 3510.73 288.521  14
  -5  -7   3 2954.67 281.315   2
   5  -7  -3 2133.99 276.958   2
  -5  -7   2 232.104 33.6353   5
  -5  -7   2 276.085 44.1461   4
   5  -7  -2 221.204 29.6494  10
   5   7  -2 314.046 32.2395  10
   5   7  -2 223.264 46.3206   8
  -5   7   2 270.515 45.0406   7
  -5  -7   2 300.069 45.2366   6
  -5   7   2 321.440 44.3763  14
  -5  -7   2 288.349 37.3716   2
   5   7  -1 535.732 71.7021  11
   5  -7  -1 535.895 59.2180  10
   5   7  -1 580.074 61.4225  10
  -5  -7   1 547.864 71.4988   4
  -5   7   1 623.796 63.7561   3
  -5   7   1 743.760 73.8125  14
   5   7  -1 541.757 78.9336   8
   5   7  -1 464.460 73.4201   7
  -5   7   1 532.061 68.7830   7
   5   7   0 22.3717 26.0737   7
  -5  -7   0 26.4872 20.0511   4
   5  -7   0 3.11766 9.15716  10
   5   7   0 6.29517 11.1279  10
  -5   7   0 16.9925 19.1361  14
  -5   7   0-7.10171 12.0743   3
   5   7   0 26.3987 28.0856   8
   5   7   0 4.05861 16.8396  11
  -5  -7  -1 7.54347 17.2631   4
   5   7   1 5.97641 22.7846   7
   5   7   1 42.4627 28.5991   8
   5   7   1 19.3972 18.8691  11
  -5  -7  -2-3.83247 17.4913   4
   5   7   2 3.90860 17.0457  11
   5   7   2 6.53488 23.2667   7
   5   7   2 21.9748 26.9939   8
  -5  -7  -3 1317.09 133.937   4
  -5  -7  -3 1040.39 127.523   9
   5   7   3 1245.93 150.679   8
  -5   7  -3 1574.92 136.579  15
   5   7   3 1031.74 142.214   7
   5   7   3 1099.17 131.401  11
   5   7   4 258.409 43.7749  11
  -5  -7  -4 175.643 38.7492   9
   5   7   4 229.984 56.1529   8
  -5   7  -4 379.565 48.4372  15
  -5  -7  -4 299.035 44.8087   4
  -5  -7  -5 1087.91 155.844   9
  -5  -7  -5 1767.03 161.660   4
   5   7   5 1370.05 159.679  11
  -5   7  -5 1990.84 165.762  15
  -5   7  -6 67.7529 30.0742  15
  -5  -7  -6 58.3071 23.9517   9
   5   7   6 42.7580 25.9387  11
   5   7   7 437.881 63.8536  11
  -5  -7  -7 370.501 64.3484   9
   5   7   8 52.2107 27.8987  11
  -5  -8  10 458.454 58.2077   1
  -5  -8  10 502.582 75.8177   4
   5  -8 -10 297.886 51.3352  12
  -5   8  10 274.255 43.4183   3
  -5  -8  10 441.827 60.0080   2
  -5  -8   9-33.7346 33.3585   4
  -5  -8   9 4.25385 25.9192   1
  -5  -8   9 7.99546 20.8384   2
  -5   8   9-19.3703 20.8560   8
  -5   8   9-4.10842 14.6335   3
   5  -8  -9 4.16626 18.5985  12
  -5  -8   8 1556.47 164.888   4
  -5  -8   8 1643.57 153.969   1
  -5   8   8 1266.98 144.242   8
  -5  -8   8 1471.23 139.634   3
  -5   8   8 1246.99 136.744   3
   5  -8  -8 1026.46 144.267  12
  -5  -8   8 1626.83 149.385   2
  -5  -8   7-3.45408 17.3901   6
   5  -8  -7 3.90255 17.8074  12
  -5  -8   7 18.7007 27.8181   4
  -5  -8   7-13.9880 26.2451   1
  -5  -8   7-6.55920 17.6516   2
  -5  -8   7 13.1186 12.8586   3
  -5   8   7-6.62723 10.4573   3
  -5   8   7-3.03185 16.3183   8
  -5   8   7-10.9850 23.6287  14
   5  -8  -6 433.432 70.6167  12
  -5  -8   6 628.880 84.9271   4
  -5   8   6 686.873 69.5872   8
  -5  -8   6 578.193 63.8596   3
  -5   8   6 511.883 62.1817   3
  -5  -8   6 669.731 74.5450   6
  -5  -8   6 698.706 72.7295   2
  -5   8   6 708.245 75.3960  14
   5  -8  -5 82.5521 27.0011  12
  -5  -8   5 119.972 37.9827   4
  -5   8   5 127.142 29.6822  14
  -5   8   5 128.543 23.0690   8
  -5  -8   5 150.384 29.3564   6
  -5  -8   5 138.963 20.2975   3
  -5   8   5 99.1762 19.0266   3
  -5  -8   5 166.844 27.9997   2
   5  -8  -5 133.793 16.7512   1
  -5   8   4 116.906 26.3117  14
  -5  -8   4 115.952 27.9282   6
  -5  -8   4 66.9702 16.2182   3
  -5   8   4 77.2392 15.0976   3
  -5  -8   4 106.324 22.1301   2
  -5  -8   4 109.184 34.2487   4
   5  -8  -3 11.4758 7.67635  10
  -5  -8   3-3.83811 18.2880   6
  -5   8   3 6.50938 18.8646  14
   5   8  -3 14.1203 20.5477  11
  -5  -8   3 18.3832 13.1589   2
  -5  -8   3 13.0594 10.1192   5
   5   8  -2 756.505 97.7592   8
   5  -8  -2 625.562 72.6594  10
   5   8  -2 806.776 74.2599  10
  -5  -8   2 959.638 95.5415   6
  -5   8   2 752.688 92.3246   7
  -5   8   2 906.617 89.1316  14
   5   8  -2 704.694 90.4515  11
  -5  -8   2 693.458 80.2379   2
   5  -8  -2 721.097 76.3766   1
  -5  -8   2 765.309 93.2286   4
  -5   8   1 27.5544 19.9628  14
   5   8  -1 22.5392 21.8960  11
   5   8  -1 5.70278 21.0420   7
  -5   8   1-3.97671 18.9489   7
   5   8  -1 25.4853 25.7411   8
  -5  -8   1 4.83252 20.5906   4
   5  -8  -1 12.8314 7.98732  10
   5   8  -1 10.7483 9.22506  10
   5  -8   0 1678.86 180.786  10
   5   8   0 1918.93 183.248  10
  -5  -8   0 2083.76 200.871   4
   5   8   0 1599.35 201.935   7
   5   8   0 1800.75 207.612   8
  -5   8   0 2459.10 197.973  14
   5   8   0 1894.07 196.884  11
  -5  -8  -1 147.892 34.4121   4
   5   8   1 100.747 27.9389  11
   5  -8   1 70.0225 17.4323  10
   5   8   1 84.4234 20.7299  10
   5   8   1 59.0637 34.6068   8
   5   8   1 79.4473 37.0424   7
   5   8   2 1174.92 146.876   7
   5   8   2 1099.82 147.668   8
   5   8   2 1246.74 134.870  11
  -5  -8  -2 1291.02 138.106   4
   5   8   3-7.49957 30.2751   7
  -5  -8  -3 13.0008 23.3274   4
   5   8   3 7.95421 19.2987  11
   5   8   3 7.86920 29.9506   8
   5   8   4 38.8550 34.0967   7
  -5  -8  -4 63.7094 24.2071   9
   5   8   4 48.5968 37.8828   8
   5   8   4 104.120 27.1492  11
  -5  -8  -4 132.150 32.5006   4
  -5   8  -4 157.168 37.3147  15
   5   8   5-4.08301 22.3241  11
  -5  -8  -5 4.01141 25.6094   4
  -5  -8  -5-4.35132 20.2907   9
   5   8   5 8.30749 33.5391   8
  -5   8  -5 54.2351 28.9031  15
  -5  -8  -6 65.6324 28.2387   9
   5   8   6 25.5188 34.9342   8
  -5   8  -6 110.683 34.4930  15
   5   8   6 69.8282 28.3738  11
   5   8   7 37.0227 25.9021  11
  -5   9  10 62.5832 27.7267  14
  -5  -9  10 170.719 49.0343   4
  -5  -9   9 154.252 42.6533   1
  -5  -9   9 138.068 35.9553   2
  -5  -9   9 79.9382 39.1505   4
   5  -9  -9 77.2838 28.8592  12
  -5   9   9 104.237 30.4567  14
  -5   9   8 25.1644 22.3797  14
  -5  -9   8 11.0911 18.8326   6
  -5  -9   8 53.2897 32.0620   1
  -5  -9   8 51.5415 24.6863   2
  -5  -9   8 21.3479 35.9397   4
   5  -9  -8 37.7970 21.7079  12
   5  -9  -7 242.798 49.2557  12
  -5  -9   7 461.338 71.6091   4
  -5   9   7 400.892 50.5707  14
  -5  -9   7 341.592 51.0995   6
  -5  -9   7 370.935 61.8410   1
  -5  -9   7 414.916 52.7105   2
  -5  -9   6 46.5191 34.9169   4
  -5   9   6 52.2191 22.0134  14
  -5  -9   6 24.6238 19.4501   6
  -5   9   6 60.2153 19.6101   8
   5  -9  -6 55.3434 24.2011  12
  -5  -9   6 48.1323 22.0636   2
   5  -9  -5 489.339 69.4690  12
  -5   9   5 623.322 69.8812  14
  -5  -9   5 585.469 71.2227   6
  -5  -9   5 550.309 83.0580   4
  -5  -9   5 541.334 65.8030   2
  -5  -9   4 390.407 61.0039   4
  -5  -9   4 266.337 45.1259   6
  -5   9   4 268.980 44.3226  14
   5  -9  -4 299.839 34.5030   1
  -5  -9   4 271.434 39.7064   2
  -5   9   3 1312.67 96.7380  14
  -5  -9   3 1210.18 99.3389   6
  -5   9   3 1005.91 106.975   7
   5  -9  -3 1039.15 80.9980   1
  -5  -9   3 1067.91 86.8828   2
  -5   9   2 111.775 35.5892   7
   5   9  -2 183.342 39.2180  11
  -5   9   2 159.321 32.1203  14
  -5  -9   2 145.103 39.7250   4
  -5  -9   2 141.758 25.4782   2
   5  -9  -2 119.196 22.8693   1
   5   9  -1 146.457 39.6427   7
  -5   9   1 150.008 34.8981   7
  -5  -9   1 145.891 38.8396   4
   5   9  -1 133.895 42.8527   8
  -5   9   1 183.561 34.5071  14
   5   9  -1 154.787 38.0559  11
   5   9   0 23.0588 21.5720  11
   5   9   0-6.80876 29.7414   7
   5   9   0 42.4009 29.3633   8
  -5  -9   0 68.0461 30.3468   4
   5   9   1 13.2005 20.0849  11
  -5  -9  -1 15.3751 25.8075   4
   5   9   1 7.25032 28.4469   7
   5   9   1-22.6088 34.3913   8
   5   9   2 38.6347 23.9866  11
   5   9   2 63.2809 34.8468   8
   5   9   2 74.1324 37.6536   7
  -5   9  -2 47.2474 28.4732  15
  -5  -9  -2 60.6836 30.8357   4
   5   9   3 324.052 58.0500  11
   5   9   3 375.046 71.7033   7
  -5   9  -3 571.885 66.2534  15
  -5  -9  -3 404.552 61.7783   4
  -5  -9  -4 116.988 35.5833   4
   5   9   4 153.576 35.5669  11
   5   9   4 121.173 45.8855   7
   5   9   5 412.832 80.3423   7
   5   9   5 407.741 61.4008  11
  -5  -9  -5 536.255 67.2215   9
   5   9   6 97.8272 28.1504  11
  -5 -10   9 189.146 37.2565   6
  -5 -10   8 339.982 69.2920   4
  -5 -10   8 265.040 47.5741   6
  -5  10   8 307.578 44.0066  14
   5 -10  -8 247.614 48.3807  12
  -5 -10   8 342.801 60.2588   1
  -5 -10   8 369.520 51.3788   2
   5 -10  -7 244.672 48.7379  12
  -5 -10   7 401.738 63.2469   1
  -5 -10   7 385.083 68.7862   4
  -5 -10   7 264.478 48.8652   6
  -5  10   7 382.324 47.6279  14
  -5 -10   7 362.119 51.0624   2
  -5 -10   6 35.9015 33.0853   4
   5 -10  -6 24.2312 21.5442  12
  -5 -10   6 74.5544 22.8114   2
  -5 -10   6 99.7375 39.3674   1
  -5  10   6 31.8159 20.3720  14
  -5 -10   6 63.3166 24.4716   6
  -5 -10   5 165.802 46.2556   4
   5 -10  -5 173.623 36.7843  12
  -5 -10   5 158.353 30.8793   2
  -5  10   5 166.727 33.4968  14
  -5 -10   5 245.538 39.9926   6
  -5 -10   4 20.0039 33.6214   4
   5 -10  -4 19.6694 20.9225  12
  -5  10   4 31.4466 23.8208  14
  -5  10   4-6.77715 33.5564   7
  -5 -10   4 15.6322 21.7610   6
  -5 -10   4 29.8411 18.2690   2
  -5  10   3 74.6201 25.4553  14
  -5  10   3 36.6223 32.6275   7
  -5 -10   3 47.6607 28.2988   6
   5 -10  -3 39.1738 14.3956   1
  -5  10   2 263.720 49.1047   7
  -5  10   2 230.628 38.7516  14
   5 -10  -2 197.400 30.6374   1
  -5 -10   2 162.185 46.3724   4
  -5 -10   1 199.443 46.4339   4
   5  10  -1 175.544 41.3949  11
  -5  10   1 156.340 39.1294   7
  -5 -10   0 134.446 38.2708   4
   5  10   0 152.408 45.0005   7
   5  10   0 127.738 35.7759  11
   5  10   1 667.914 105.655   7
   5  10   1 681.311 94.0474  11
  -5  10  -1 937.336 96.9895  15
  -5 -10  -1 793.849 101.466   4
   5  10   2 374.819 59.4290  11
   5  10   2 308.019 68.2960   7
  -5  10  -2 494.099 61.5949  15
  -5 -10  -2 346.867 62.5490   4
   5  10   3 17.2479 22.6172  11
  -5 -10  -3 15.8538 26.2520   4
   5  10   3 56.1250 40.4474   7
  -5  10  -3 45.8493 30.5691  15
   5  10   4 58.6382 28.4620  11
  -5 -10  -4 44.2743 30.9523   4
   5  10   4 8.21215 39.2714   7
   5  10   5 16.3009 24.8548  11
  -5 -10  -5 9.39168 22.8119   9
  -5 -11   8 3.60699 23.5295   2
  -5 -11   7 97.2701 26.9636   2
  -5  11   7 80.2075 27.0260  14
  -5 -11   6 134.802 42.8462   1
  -5 -11   6 83.8711 40.5234   4
   5 -11  -6 65.2117 29.3322  12
  -5  11   6 81.5713 25.7880  14
   5 -11  -5 16.0331 23.5377  12
  -5  11   5 14.5439 22.1709  14
  -5 -11   5 7.39206 33.0084   4
  -5  11   5 7.36742 34.3596   7
  -5  11   4 610.510 63.7804  14
  -5  11   4 383.091 73.0543   7
  -5 -11   4 487.204 80.1067   4
   5 -11  -4 352.562 61.1417  12
  -5 -11   3 97.2679 39.5757   4
  -5  11   3 106.605 29.9888  14
  -5  11   3 75.3040 36.4452   7
  -5  11   2 310.173 56.0818   7
  -5 -11   2 248.886 55.4238   4
  -5  11   1-10.1504 24.6222   7
  -5 -11   1 32.4855 32.1206   4
   5  11   0 48.4915 29.9813  11
   5  11   0 147.847 47.0861   8
  -5 -11   0 94.5623 37.6977   4
   5  11   0 107.072 44.0817   7
  -5  11   0 146.696 34.3316  15
   5  11   1 23.3360 28.5039  11
  -5 -11  -1 18.2564 30.1521   4
   5  11   1 22.9342 33.3913   8
  -5  11  -1 15.3174 27.8195  15
   5  11   1 31.6952 38.4935   7
  -5  11  -2 104.298 35.5459  15
   5  11   2 72.8643 33.1904  11
  -5 -11  -2 87.1273 35.9262   4
   5  11   2 90.7809 44.5006   7
  -5 -11  -3 16.3585 29.5665   4
   5  11   3 62.3834 31.3602  11
   5  11   4 183.049 41.1562  11
  -5  12   5 127.909 29.1582  14
  -5  12   4 2.85928 20.7242  14
  -5  12   4 13.6117 36.0563   7
   5 -12  -3 27.4644 24.6567  12
  -5  12   3 38.9533 34.5185   7
  -5  12   2 17.5174 29.4435   7
  -5  12   1 175.764 39.6699  15
  -5  12   0 18.0062 27.8874  15
  -6   0  14 554.707 72.8210   2
   6   0 -14 589.215 72.1619  12
  -6   0  13-3.48846 20.1915   2
  -6   0  13 14.0294 23.5459   3
   6   0 -13 3.04000 19.4052  12
  -6   0  12-6.54758 17.9001   2
   6   0 -12 11.1928 14.4541   9
  -6   0  12 8.59925 19.6252   3
   6   0 -12 5.44858 17.3947  12
  -6   0  11 9.07642 17.7449   2
   6   0 -11-7.16872 14.1987  12
   6   0 -11 4.01984 12.0952   9
  -6   0  11 3.93194 17.1437   3
  -6   0  10 1822.63 165.406   2
   6   0 -10 1775.18 161.761  12
  -6   0   9 20.6787 16.4186   3
  -6   0   9 2.57514 14.5212   2
   6   0  -9 7.91122 11.4797  12
  -6   0   8 6424.11 555.624  11
  -6   0   8 6008.11 557.975   2
  -6   0   8 4619.60 558.633   3
   6   0  -8 5803.09 554.687  12
  -6   0   7-4.61081 9.56896   2
  -6   0   7 4.18501 5.06928   1
   6   0  -7 15.9351 11.8694  10
   6   0  -7 5.06201 8.80177  12
   6   0  -6 2412.30 266.012  10
  -6   0   6 2662.38 260.994   1
  -6   0   6 3061.86 269.135   2
   6   0  -6 2858.80 265.412  12
   6   0  -5 2.07648 8.16698  10
   6   0  -5 5.93906 7.43410   9
  -6   0   5 30.5489 13.4984   6
  -6   0   5 7.76250 8.24520   8
   6   0  -5 6.16112 9.18379  11
  -6   0   5-2.40908 10.5201   2
   6   0  -4 1593.95 142.040   9
   6   0  -4 1275.66 145.400  11
  -6   0   4 1514.02 149.705   6
  -6   0   4 1472.42 144.188   8
   6   0  -4 1241.99 145.986  10
  -6   0   3 9.60977 12.2013   6
   6   0  -3 1.09255 5.90238   9
   6   0  -3 7.29764 8.03357  10
   6   0  -3 16.2859 11.2683  11
   6   0  -2 5473.94 462.633   9
  -6   0   2 4340.58 465.468   9
   6   0  -2 4702.35 463.205   8
  -6   0   2 5697.82 461.217   7
  -6   0   2 4607.16 475.581   6
  -6   0   1-2.10364 8.25402   9
  -6   0   1-8.03079 14.2954   5
  -6   0   1-5.28148 13.0563  14
   6   0  -1 17.5650 11.9382   8
  -6   0   0 7787.39 620.077   5
  -6   0   0 6732.74 605.227  14
  -6   0  -1 8.64359 14.2439   5
  -6   0  -1 10.5370 9.45190  14
  -6   0  -1-7.70443 10.6506   9
  -6   0  -2 6062.40 668.757   9
   6   0   2 7151.17 659.350   7
  -6   0  -3-9.37769 13.9594   9
  -6   0  -3-1.50459 9.72311  15
  -6   0  -4 83.5711 23.7968   9
  -6   0  -4 113.418 18.9210  15
  -6   0  -5-3.86129 15.5894   9
  -6   0  -5-3.08482 10.7883  15
  -6   0  -6 55.8686 22.3847   9
  -6   0  -6 63.1814 16.4478  15
  -6   0  -7 4.79128 23.2461   9
  -6   0  -7-5.24437 14.3107  15
  -6   0  -8 1955.76 210.808   9
  -6   1  14 180.779 35.3126   2
  -6  -1  14 216.180 39.6295   2
   6  -1 -14 142.241 34.3282  12
   6  -1 -13 1294.64 130.856   9
  -6  -1  13 979.113 133.901   3
  -6   1  13 1238.89 130.489   2
  -6  -1  13 1504.60 138.529   2
   6  -1 -13 1180.46 131.615  12
   6   1 -13 1182.40 128.507  12
   6  -1 -12 383.168 50.2489   9
  -6   1  12 366.381 50.1217   2
  -6  -1  12 274.501 52.9494   3
  -6  -1  12 463.855 56.2047   2
   6  -1 -12 354.306 50.0877  12
   6   1 -12 415.300 49.0399  12
   6   1 -11 1835.21 166.277   9
  -6   1  11 1772.94 171.741   2
  -6  -1  11 2098.31 177.683   2
   6   1 -11 1646.66 168.193  12
   6  -1 -11 1611.78 170.715  12
   6   1 -10 324.719 37.8154  12
   6  -1 -10 271.890 40.0428  12
   6   1 -10 299.942 35.0563   9
  -6   1  10 294.569 39.7368   2
  -6  -1  10 210.595 41.4537   3
  -6  -1  10 379.926 45.9274   2
   6   1  -9 682.588 65.5307   9
  -6  -1   9 604.658 64.8219   1
  -6  -1   9 685.882 73.7742   2
  -6   1   9 594.735 70.6115   2
  -6  -1   9 538.286 73.8813   3
   6   1  -9 646.127 67.6459  12
   6  -1  -9 617.601 70.5386  12
   6  -1  -8 6.50781 10.9848  12
  -6  -1   8 18.0740 14.5812   2
  -6   1   8 4.55718 11.1171   2
  -6  -1   8 13.1501 7.82185   1
  -6   1   8 18.8399 11.0076  11
   6   1  -8 12.8607 8.88971  12
  -6  -1   8 16.2915 13.9139   3
  -6  -1   7 841.668 73.6920  11
   6  -1  -7 588.146 69.7626  10
  -6  -1   7 664.281 65.8264   1
   6  -1  -7 590.655 69.3375  12
   6   1  -7 580.408 65.5251  12
  -6  -1   7 688.357 72.1027   2
  -6   1   7 551.321 69.1671   2
  -6  -1   6 453.963 46.7139  11
   6  -1  -6 346.076 43.2755  10
   6   1  -6 386.916 37.8638   9
  -6  -1   6 433.555 45.5661   8
  -6   1   6 327.761 35.0587   1
  -6   1   6 346.535 44.2198   2
   6  -1  -6 347.807 43.6528  12
   6   1  -6 403.602 40.4329  12
   6   1  -5 3227.67 386.917  11
   6  -1  -5 3372.66 383.367  11
   6  -1  -5 3161.96 384.981  10
   6   1  -5 4291.92 380.320   9
  -6  -1   5 4264.56 391.107   6
  -6   1   5 4453.59 389.882   6
  -6   1   5 4098.98 389.709   2
   6   1  -5 4113.81 383.470  12
  -6   1   5 4664.61 383.761   8
   6  -1  -4 1374.34 162.295  10
   6  -1  -4 1747.40 161.174   9
   6   1  -4 1667.47 156.053   9
  -6  -1   4 1749.63 167.916   6
  -6   1   4 1730.00 166.784   6
  -6  -1   4 1489.35 164.556   2
   6   1  -4 1348.33 163.225  11
   6  -1  -4 1244.28 160.130  11
  -6  -1   4 1804.12 164.445   8
  -6   1   4 1944.07 159.795   8
   6  -1  -3 4733.82 589.051  10
   6   1  -3 6285.71 583.945   9
  -6   1   3 7550.69 598.852   6
  -6  -1   3 6392.04 594.903   2
  -6  -1   3 6590.35 586.653   7
   6  -1  -3 5889.45 592.516  11
   6   1  -3 5797.70 593.626  11
  -6  -1   2 704.070 79.1790   9
   6   1  -2 855.243 76.6869   9
   6   1  -2 833.721 89.4986  11
   6   1  -2 763.643 82.1160   8
   6  -1  -2 642.686 82.6954  10
   6  -1  -2 525.533 79.5046   6
  -6  -1   2 945.048 80.2343   7
  -6   1   1 2339.91 172.390  14
  -6  -1   1 1665.64 163.727   9
   6  -1  -1 1986.17 163.133   9
  -6   1   1 1557.95 165.487   9
   6  -1  -1 1090.34 164.100   6
  -6  -1   1 1951.42 176.362   5
   6   1  -1 1388.98 167.311   8
   6  -1  -1 1495.93 162.192   8
  -6  -1   0 125.559 18.6515  14
  -6   1   0 76.0697 19.6666   9
  -6  -1   0 89.8848 18.4095   9
   6   1   0 113.390 17.0506   9
  -6  -1   0 72.2673 24.1473   5
  -6  -1  -1 85.9183 17.7157   9
  -6   1  -1 70.3591 16.1610  14
  -6  -1  -1 50.8296 12.4682  14
  -6  -1  -1 66.4591 21.6342   5
   6   1   1 58.6941 10.1142   7
  -6   1  -1 36.2179 15.7655   9
  -6   1  -2 159.656 27.0774   9
  -6  -1  -2 151.348 24.7268   9
   6   1   2 113.854 20.3188   7
  -6   1  -3 2775.48 301.334   9
  -6  -1  -3 2842.14 299.762   9
  -6   1  -3 3127.76 296.036  15
  -6  -1  -3 3133.82 291.790  15
  -6   1  -4 735.724 91.6277   9
  -6  -1  -4 715.944 89.6090   9
  -6  -1  -4 802.199 81.0313  15
  -6   1  -4 873.648 85.6228  15
  -6   1  -5 2276.46 244.799   9
  -6  -1  -5 2206.64 242.668   9
  -6  -1  -5 2487.67 231.770  15
  -6   1  -5 2376.18 234.802  15
  -6   1  -6 454.917 61.2579   9
  -6  -1  -6 388.440 57.6146   9
  -6   1  -6 441.145 49.8294  15
  -6  -1  -6 389.565 45.7240  15
  -6   1  -7 1833.45 202.448   9
  -6  -1  -7 1613.52 198.627   9
  -6   1  -7 2061.24 189.640  15
  -6  -1  -8 5.18641 22.1221   9
  -6   1  -8 24.1296 18.3793  15
  -6   2  14 82.9701 22.8239   2
  -6   2  13 151.390 28.3147   2
  -6  -2  13 200.694 37.9597   2
   6  -2 -13 183.918 34.0157   9
  -6  -2  13 99.3654 30.8867   3
  -6   2  13 79.4876 30.0395   3
   6  -2 -13 89.3341 28.5257  12
  -6  -2  12 4.34572 20.7232   3
  -6   2  12-4.05933 20.8481   3
  -6   2  12 39.2438 18.6828   2
  -6  -2  12 15.5916 21.6722   2
   6  -2 -12 20.0189 18.5658  12
  -6   2  11 143.882 25.4635   2
  -6  -2  11 158.647 30.4844   2
   6  -2 -11 93.3578 25.8806  12
   6   2 -11 122.785 21.9995  12
  -6  -2  11 100.097 30.8339   3
  -6   2  11 131.016 30.2266   3
  -6  -2  11 201.842 34.0075   4
   6   2 -10 698.982 66.3325   9
  -6  -2  10 783.782 79.8296   2
  -6   2  10 650.514 72.6433   2
   6  -2 -10 654.527 75.0300  12
   6   2 -10 685.388 69.4269  12
  -6  -2  10 456.340 74.2205   3
  -6   2  10 509.326 74.6505   3
   6   2  -9 1337.45 64.4109   9
  -6   2   9 1297.08 77.8765   2
  -6  -2   9 1288.93 84.5523   2
  -6  -2   9 1096.60 69.7042   1
   6   2  -9 1363.65 70.7188  12
   6  -2  -9 1189.72 80.0398  12
  -6  -2   9 934.209 81.1146   3
  -6   2   9 1068.48 81.4301   3
   6   2  -8 1341.08 123.960   9
   6   2  -8 1265.51 127.160  12
   6  -2  -8 1318.44 134.789  12
  -6  -2   8 1140.67 136.336   3
  -6   2   8 1076.16 134.600   3
  -6   2   8 1226.36 132.002   2
  -6  -2   8 1365.46 130.160   1
  -6   2   7 2989.23 281.334   2
   6  -2  -7 2596.04 281.223  12
   6   2  -7 2895.99 274.441  12
  -6  -2   7 3079.53 279.300   1
   6  -2  -7 2629.09 280.060  10
   6   2  -6 2074.52 210.479  10
   6  -2  -6 1919.64 209.082  10
  -6   2   6 2222.52 212.331   2
  -6  -2   6 2132.10 212.039   2
  -6   2   6 2186.41 211.225   6
   6  -2  -6 1853.13 211.209  12
   6   2  -6 2249.88 204.157  12
   6   2  -5 876.003 81.8078  12
   6  -2  -5 711.270 82.4116  11
   6   2  -5 617.948 88.8335  11
   6   2  -5 814.616 87.8243  10
   6  -2  -5 683.094 85.8783  10
  -6  -2   5 815.158 89.4997   2
  -6   2   5 891.083 89.1704   6
  -6   2   5 993.421 82.8787   8
  -6  -2   5 934.301 90.9192   8
   6  -2  -4 381.223 38.3661   9
   6  -2  -4 311.532 36.4693  10
   6   2  -4 268.455 35.9611  10
  -6  -2   4 348.804 39.8701   2
   6   2  -4 310.201 41.0504  11
   6  -2  -4 320.219 34.1321  11
  -6   2   4 243.993 26.5822   1
   6  -2  -3 72.3397 14.5589  10
   6   2  -3 22.1884 10.9888  10
   6  -2  -3 54.4198 13.4293   9
  -6  -2   3 50.1258 12.2538   7
   6   2  -3 33.9082 16.0330  11
  -6  -2   3 33.7478 13.9715   2
  -6  -2   2 1654.08 150.157   9
   6  -2  -2 2172.05 155.805   9
   6   2  -2 1787.25 162.001  11
  -6  -2   2 1863.53 167.527   6
   6  -2  -2 1270.38 150.738   6
   6   2  -2 1112.90 153.094   8
   6   2  -2 1323.49 154.897  10
   6  -2  -2 1308.87 153.452  10
   6   2  -1 2469.25 254.487  11
  -6   2   1 3269.90 262.556   5
  -6  -2   1 2925.64 257.153   5
  -6   2   1 3632.44 255.305  14
  -6  -2   1 2529.70 244.430   9
   6   2  -1 2083.56 252.057   8
   6  -2  -1 2511.07 241.222   8
   6  -2  -1 1698.40 245.271   6
  -6  -2   0 1436.39 164.054   9
  -6   2   0 1427.57 167.984   9
   6   2   0 1370.46 174.847   8
  -6  -2   0 1677.36 174.861   5
  -6   2   0 2012.46 181.252   5
  -6   2   0 2093.81 171.914  14
  -6  -2   0 1748.14 162.400  14
  -6   2  -1 2590.29 288.181   9
  -6  -2  -1 2614.37 284.849   9
   6   2   1 2956.34 284.059   7
  -6   2  -1 3409.37 289.435  14
  -6  -2  -1 2974.82 279.911  14
  -6   2  -2 3557.05 339.347   9
  -6  -2  -2 3322.32 335.067   9
  -6  -2  -2 3602.83 326.915  15
  -6   2  -2 3657.08 335.170  14
   6   2   2 2712.01 333.297   7
  -6   2  -3 976.858 108.115  15
  -6  -2  -3 1061.39 100.982  15
  -6   2  -3 990.727 113.471   9
  -6  -2  -3 979.438 110.476   9
  -6  -2  -4 130.298 27.9283   9
  -6  -2  -4 135.863 18.5514  15
  -6   2  -4 174.655 27.0933  15
  -6   2  -4 199.554 33.9148   9
  -6  -2  -5 7.54308 13.9542   9
  -6   2  -5 2.28400 14.6313  15
  -6  -2  -5 23.1749 9.50029  15
  -6   2  -5 4.28822 17.3551   9
  -6  -2  -6 8.47842 17.5818   9
  -6   2  -6 2.33208 15.3736  15
  -6   2  -6-4.69623 21.8900   9
  -6  -2  -7 405.781 65.2488   9
  -6   2  -7 530.204 59.5068  15
  -6   2  -8 1756.49 159.110  15
  -6  -2  -8 1204.19 164.884   9
   6  -3 -14 551.531 73.5670   9
  -6  -3  13 182.507 40.4551   3
  -6   3  13 139.742 36.4090   3
  -6   3  13 244.680 33.8866   2
  -6  -3  13 270.474 45.5920   2
   6  -3 -13 190.594 38.2563  12
  -6  -3  12 1151.60 145.940   3
  -6   3  12 1268.27 145.170   3
  -6   3  12 1353.77 139.391   2
   6  -3 -12 1298.48 145.282  12
  -6   3  11 247.353 38.2189   2
  -6  -3  11 438.387 52.9124   2
  -6  -3  11 247.980 45.1924   3
  -6   3  11 264.981 44.7394   3
   6  -3 -11 311.930 45.4886  12
  -6  -3  11 448.501 55.5623   4
  -6  -3  10 787.950 105.060   3
  -6   3  10 829.716 104.655   3
   6  -3 -10 973.446 106.229  12
  -6  -3  10 998.162 100.361   1
  -6   3  10 864.704 100.257   2
  -6  -3  10 1130.92 110.194   2
   6  -3  -9 115.856 24.8850  12
  -6  -3   9 99.2111 26.4496   3
  -6   3   9 77.3411 22.2956   3
  -6   3   9 79.7553 18.9299   2
  -6  -3   9 73.1062 17.6436   1
   6  -3  -8 8.96825 13.6704  12
  -6  -3   8 6.47882 14.4845   3
  -6   3   8 5.85005 13.9442   3
  -6  -3   8 12.6061 13.4401   1
  -6   3   8 17.3641 13.2540   2
   6   3  -8 8.86759 6.10706  12
  -6  -3   7 1060.40 104.250   2
  -6  -3   7 879.384 103.057   3
  -6   3   7 839.217 101.507   3
  -6   3   7 1034.86 101.744   2
  -6  -3   7 1074.90 102.507   1
   6  -3  -7 904.627 103.035  12
   6   3  -7 929.265 92.6244  12
  -6  -3   6 1286.17 124.744   2
  -6   3   6 1437.82 122.978   6
   6  -3  -6 997.591 123.578  12
   6   3  -6 1171.29 113.157  12
   6  -3  -6 1046.84 119.803  10
   6   3  -6 1202.51 121.906  10
   6   3  -5 192.871 25.1733  10
   6  -3  -5 160.435 22.9260  10
   6   3  -5 142.953 14.8889  12
   6   3  -5 152.600 28.7509  11
  -6  -3   5 118.073 23.7506   2
  -6  -3   5 168.234 28.6070   6
  -6  -3   4 4488.75 414.030   6
   6  -3  -4 4062.70 403.240  11
   6   3  -4 3766.90 412.209  11
   6   3  -4 4051.65 407.425  10
   6  -3  -4 3775.12 405.765  10
   6   3  -4 4422.29 398.011  12
  -6  -3   4 3703.23 401.476  15
  -6  -3   4 4299.56 409.647   2
   6   3  -3 1327.49 121.173  12
   6   3  -3 1190.92 135.227  11
   6   3  -3 1184.16 130.342  10
   6  -3  -3 1269.37 129.575  10
  -6  -3   3 1222.52 123.886   9
  -6   3   3 1175.32 121.704   1
  -6  -3   3 1570.43 136.045   2
  -6  -3   3 1093.01 123.712  15
  -6  -3   3 1710.86 133.875   7
  -6  -3   3 1623.91 141.563   6
   6   3  -2 4759.16 419.562  12
   6   3  -2 5336.41 437.814  11
   6  -3  -2 3787.52 427.302  10
   6   3  -2 3824.51 429.225  10
  -6  -3   2 4541.80 423.412   9
  -6   3   2 6673.17 442.583  14
  -6   3   2 4134.72 420.027   1
   6   3  -2 3314.96 430.411   8
  -6  -3   2 5926.86 445.247   6
   6  -3  -2 3950.68 424.682   6
   6   3  -1 35.6376 7.26437  12
  -6   3   1 59.5748 21.2596   5
  -6  -3   1 56.1821 20.2780   5
   6   3  -1 38.1663 17.6827  11
   6  -3  -1 40.9280 14.3122  10
   6   3  -1 13.0884 12.8246  10
   6  -3  -1 36.6252 12.8804   6
   6   3  -1 13.6061 15.2590   8
  -6  -3   1 42.2648 10.9898   9
  -6   3   1 37.8658 16.4474  14
  -6   3   1 24.4292 7.28580   1
  -6   3   0 744.595 82.0741   5
  -6  -3   0 817.552 79.7575   5
  -6  -3   0 622.142 67.6480   9
  -6   3   0 513.784 63.4426   1
   6   3   0 629.818 82.7365   8
   6   3   0 539.889 68.0377   7
   6   3   0 578.671 77.4203  11
  -6  -3   0 667.811 63.8143  14
  -6   3   0 947.734 79.3618  14
  -6   3  -1 3.26312 11.6951   9
  -6  -3  -1 10.8262 10.5913   9
  -6   3  -1 27.9781 14.8826  14
   6   3   1 23.7311 13.5775   7
   6   3   2 411.364 65.8648   7
  -6  -3  -2 597.206 56.3695  15
  -6  -3  -2 604.002 66.3926   9
  -6   3  -2 546.818 70.1533   9
  -6  -3  -3 770.827 75.8041  15
  -6   3  -3 923.641 89.2597  15
  -6   3  -3 713.438 90.6398   9
  -6  -3  -3 739.477 86.9965   9
  -6  -3  -4 2463.28 241.389  15
  -6   3  -4 3229.32 255.196  15
  -6   3  -4 2422.79 258.189   9
  -6  -3  -4 2327.24 253.990   9
  -6  -3  -5 41.7204 19.4966   9
  -6   3  -5 45.9649 20.1484  15
  -6   3  -5 35.0630 24.6319   9
  -6   3  -6 2326.10 208.481  15
  -6  -3  -6 1714.62 211.103   9
  -6  -3  -7 166.521 39.2887   9
  -6   3  -7 239.551 37.7536  15
  -6  -3  -8 362.013 64.2855   9
  -6   3  -8 420.528 69.6912   9
  -6   3  -8 553.523 61.6317  15
  -6   3  -9 12.0702 23.1745  15
   6  -4 -13 88.6037 28.9811  12
  -6  -4  13 108.472 32.0986   3
  -6   4  13 47.7704 24.1055   3
  -6   4  12 13.0313 14.6758   2
  -6  -4  12 17.9464 21.8092   2
   6  -4 -12 12.0293 17.9463  12
  -6  -4  12 17.1306 21.6044   3
  -6   4  12 15.1314 21.0309   3
  -6  -4  11 313.696 47.1141   3
  -6   4  11 204.610 40.6176   3
   6  -4 -11 266.108 44.8423  12
  -6   4  11 268.735 38.0520   2
  -6  -4  11 315.994 40.1895   1
  -6  -4  11 392.080 56.2399   4
  -6   4  10 2.09910 13.1001   2
  -6  -4  10-7.08448 15.5696   1
  -6  -4  10 17.9204 17.0530   3
  -6   4  10 9.50044 15.9465   3
   6  -4 -10 3.56586 15.5505  12
  -6  -4  10 9.08628 22.4624   4
  -6   4   9 1924.32 201.395   2
  -6  -4   9 2210.35 204.539   1
   6  -4  -9 1776.59 206.029  12
  -6  -4   9 2530.82 212.424   2
  -6  -4   9 1792.02 206.096   3
  -6   4   9 1726.81 203.679   3
  -6  -4   9 2751.95 216.815   4
  -6  -4   8 24.0774 15.4426   1
  -6   4   8 10.6018 11.9839   2
  -6  -4   8 64.0021 20.5521   2
   6  -4  -8 36.3825 17.6698  12
  -6  -4   8 6.33636 14.9434   3
  -6   4   8 41.9716 16.9921   3
   6  -4  -7 3366.15 365.523  12
  -6   4   7 3490.54 363.064   3
  -6  -4   7 4617.25 368.478   2
  -6  -4   7 3573.16 365.064   3
   6   4  -6 4.19428 9.81047  10
   6  -4  -6 3.70003 9.83567  10
  -6  -4   6 15.9353 14.3185   2
   6  -4  -6 6.51239 14.2215  12
  -6  -4   6 31.9160 16.3737   6
  -6  -4   5 1158.10 107.171   6
  -6   4   5 1004.84 98.6008   6
   6   4  -5 913.255 97.8526  10
   6  -4  -5 900.180 96.8374  10
  -6  -4   5 1082.60 102.578   2
   6   4  -4 33.5943 13.3158  10
   6  -4  -4 10.9534 8.04456  11
   6  -4  -4 16.0442 10.1198  10
   6   4  -4 23.2540 16.1265  11
  -6  -4   4 8.91827 6.75590  15
  -6  -4   4 34.6607 16.5407   6
  -6   4   4 4.50799 11.0134   6
  -6  -4   4 12.6964 12.8512   2
  -6  -4   3 192.275 33.0383   6
   6   4  -3 179.148 31.9913  11
   6  -4  -3 139.104 23.5094  10
   6   4  -3 186.398 25.8840  10
  -6  -4   3 173.920 18.7772   9
  -6  -4   3 127.372 18.3199  15
  -6  -4   3 148.590 27.3772   2
  -6   4   3 111.831 30.9664  14
  -6  -4   2 214.729 31.2895   2
  -6   4   2 122.178 18.5880   1
  -6   4   2 231.384 33.8630  14
   6   4  -2 180.991 17.0233  12
   6   4  -2 163.759 32.0808  11
   6  -4  -2 144.956 24.2288  10
   6   4  -2 138.079 25.6658  10
  -6  -4   2 130.736 19.6207   9
  -6  -4   2 143.007 17.9175  15
   6   4  -2 145.238 31.2087   8
  -6   4   2 198.223 34.6227   5
  -6  -4   2 153.082 28.8550   5
   6  -4  -2 145.353 21.3223   6
  -6  -4   2 217.316 36.4339   6
  -6   4   1 2906.36 313.694   1
  -6  -4   1 3030.27 311.359  15
  -6   4   1 3829.64 314.665   7
   6   4  -1 2685.75 330.254   8
   6   4  -1 3679.47 312.764  12
   6   4  -1 3415.84 329.359  11
   6  -4  -1 2929.08 320.438  10
   6   4  -1 2730.21 322.554  10
  -6  -4   1 3048.43 316.060   9
  -6   4   1 4798.16 339.024   5
  -6  -4   1 3837.75 328.014   5
  -6   4   1 4713.47 331.821  14
   6  -4  -1 2909.34 318.376   6
  -6   4   0 165.141 32.6788   5
  -6  -4   0 154.019 27.8305   5
   6   4   0 114.970 27.9439  11
  -6  -4   0 106.162 11.4817  15
  -6  -4   0 79.4717 17.0872   9
   6   4   0 40.4179 26.9784   8
   6  -4   0 132.024 26.8818   6
   6   4   0 68.4664 20.5660   7
  -6  -4   0 101.501 12.2904  14
  -6   4   0 128.288 27.6493  14
   6   4   1 3534.47 411.573   8
   6   4   1 3239.96 397.622   7
   6   4   1 4320.17 389.404  12
  -6  -4  -1 3717.34 394.287   9
  -6   4  -2 75.3327 22.4504   9
   6   4   2 54.3662 22.0896   7
  -6  -4  -2 49.7114 15.4766   9
  -6  -4  -3 1834.78 198.116   9
  -6   4  -3 1600.59 201.081   9
  -6  -4  -4 58.6007 20.0836   9
  -6   4  -4 50.5361 21.4208  15
  -6  -4  -5 3.89372 17.7668   9
  -6   4  -5-6.14472 18.0196  15
  -6  -4  -6 113.031 31.2808   9
  -6   4  -6 82.6422 31.9619   9
  -6   4  -6 154.909 31.3574  15
  -6   4  -7 742.546 105.908   9
  -6  -4  -7 796.967 103.779   9
  -6   4  -7 1032.04 101.631  15
  -6   4  -8 142.575 34.6220  15
   6  -5 -12 944.701 117.314  12
  -6  -5  12 1101.61 118.307   3
  -6   5  12 1027.78 114.635   3
  -6  -5  11 274.307 52.5995   4
  -6  -5  11 401.518 53.4091   2
  -6  -5  11 233.875 43.2346   3
  -6   5  11 258.227 41.4624   3
   6  -5 -11 212.224 42.5037  12
  -6  -5  11 293.995 41.1107   1
  -6  -5  10 506.332 68.7514   3
  -6   5  10 411.669 64.4712   3
  -6  -5  10 814.615 78.8710   2
   6  -5 -10 520.688 70.5777  12
  -6  -5  10 699.084 84.2900   4
  -6  -5  10 655.936 69.4249   1
  -6  -5   9 177.330 33.8682   1
  -6  -5   9 244.358 38.5328   2
  -6  -5   9 244.111 43.3697   4
   6  -5  -9 122.899 31.5488  12
  -6  -5   9 205.275 34.0812   3
  -6   5   9 174.804 31.5392   3
  -6  -5   8 37.0506 19.9956   2
  -6  -5   8 51.5571 22.1118   1
  -6  -5   8 38.6854 22.9792   4
  -6  -5   8 29.8474 17.7770   3
  -6   5   8 28.4481 15.4806   3
   6  -5  -8 21.6425 18.4216  12
   6  -5  -7 10.6067 14.2721  12
  -6  -5   7 5.68771 13.7971   3
  -6   5   7-14.6038 13.8950   3
  -6  -5   7 15.3010 14.2642   2
   6  -5  -6 1145.17 134.319  12
   6   5  -6 1317.48 129.146  10
   6  -5  -6 1373.12 128.102  10
  -6   5   6 948.390 124.141   8
  -6  -5   6 1406.49 136.637   6
  -6   5   6 1497.08 128.044   6
  -6  -5   6 1419.43 134.066   2
   6   5  -5 419.334 62.0640  11
  -6  -5   5 507.230 56.6565   2
  -6  -5   5 553.775 61.7809   6
  -6   5   5 473.446 51.7927   6
   6   5  -5 429.681 51.9003  10
   6  -5  -5 419.907 50.7367  10
  -6  -5   4 4179.67 363.364   6
   6  -5  -4 3533.63 350.227  10
   6   5  -4 3912.32 352.443  10
   6   5  -4 4079.15 365.694  11
  -6  -5   4 3242.60 346.053  15
  -6  -5   4 4216.63 357.022   2
   6   5  -3 931.414 106.893  11
   6   5  -3 1227.83 101.537  10
   6  -5  -3 966.989 96.7262  10
  -6  -5   3 905.736 90.4804   9
  -6  -5   3 1057.32 102.557   2
  -6  -5   3 809.098 90.0844  15
  -6  -5   3 1116.82 109.568   6
  -6  -5   2 2593.05 226.304   6
  -6   5   2 2781.93 223.029   5
  -6  -5   2 2094.79 212.383   5
  -6   5   2 2133.20 211.609   7
   6   5  -2 2341.77 219.663  11
   6   5  -2 2177.78 210.598  10
   6  -5  -2 2170.16 207.648  10
  -6  -5   2 2072.41 203.432   9
  -6  -5   2 2502.35 215.672   2
   6   5  -2 1603.96 216.168   8
  -6   5   2 2812.25 219.502  14
  -6  -5   2 1880.72 200.043  15
  -6  -5   1 572.941 61.1777  15
   6   5  -1 550.437 82.6661   8
  -6   5   1 752.928 68.6717   7
   6   5  -1 685.673 79.2055  11
   6  -5  -1 587.281 70.7434  10
   6   5  -1 605.535 73.5903  10
  -6  -5   1 595.999 66.9856   9
  -6   5   1 829.552 80.4194  14
   6  -5  -1 700.529 68.4580   6
   6   5  -1 672.886 63.2885  12
  -6   5   1 951.603 85.8776   5
  -6  -5   1 665.010 75.1561   5
   6  -5   0 81.5406 19.9349   6
   6   5   0 83.6230 23.3543   7
   6   5   0 63.2214 28.8859   8
   6  -5   0 86.0749 13.7556   8
  -6  -5   0 99.4268 17.8571   9
   6   5   1 106.309 28.5927   7
  -6  -5  -1 93.7404 20.1384   9
   6   5   1 74.5635 32.4646   8
  -6   5  -1 149.597 28.5937  14
  -6  -5  -2 382.698 49.8181   9
   6   5   2 413.527 70.5511   8
   6   5   2 359.637 58.1186   7
   6   5   2 420.188 59.1612  11
  -6  -5  -3 85.4528 22.1110   9
  -6   5  -3 133.830 31.2194  15
   6   5   3 99.7177 31.7555  11
   6   5   4 1395.23 153.974  11
  -6  -5  -4 1128.86 144.740   9
  -6  -5  -5 556.933 79.8167   9
  -6   5  -5 647.730 85.2938   9
  -6  -5  -5 760.964 78.8419   4
  -6   5  -5 700.655 81.8762  15
  -6  -5  -6 1017.56 134.072   9
  -6   5  -6 1193.83 140.010   9
  -6   5  -6 1477.42 136.293  15
  -6  -5  -7 49.6541 26.4946   9
  -6   5  -7 96.9885 34.4212   9
  -6   5  -7 106.034 32.5756  15
  -6  -6  12 19.2648 22.3907   3
  -6   6  12 16.4130 23.0401   3
  -6  -6  12 28.6579 22.5593   1
  -6  -6  11 266.938 49.6942   4
  -6  -6  11 214.004 41.7705   2
  -6  -6  11 212.890 37.4368   1
   6  -6 -11 160.120 36.8021  12
  -6  -6  11 177.379 37.0034   3
  -6   6  11 179.547 35.5728   3
  -6  -6  10 354.659 49.5440   3
  -6   6  10 334.803 47.4637   3
  -6  -6  10 458.522 65.7683   4
  -6  -6  10 332.751 50.1242   1
  -6  -6  10 462.942 58.3317   2
   6  -6 -10 250.499 49.1488  12
  -6  -6   9 759.707 89.0591   4
  -6  -6   9 692.943 76.3594   1
  -6  -6   9 547.280 70.6068   3
  -6   6   9 526.814 68.1420   3
  -6  -6   9 735.906 78.0901   2
   6  -6  -9 499.126 73.1829  12
  -6  -6   8 1132.87 111.524   4
  -6  -6   8 830.720 92.6438   3
  -6   6   8 779.297 90.4198   3
  -6  -6   8 884.573 99.2422   1
   6  -6  -8 610.981 93.9404  12
  -6  -6   8 1055.56 100.036   2
  -6  -6   7 719.604 82.1293   3
  -6   6   7 732.983 80.4311   3
  -6  -6   7 814.730 86.0032   2
  -6  -6   7 836.120 88.9344   6
  -6   6   7 762.146 75.9296   6
  -6   6   7 544.430 77.9132   8
  -6  -6   7 928.263 95.2810   4
  -6   6   6 1248.99 148.700   3
  -6  -6   6 1807.52 156.322   2
  -6  -6   6 1441.23 151.398   3
  -6   6   6 1432.75 144.796   6
  -6  -6   6 1744.51 159.313   6
  -6   6   6 1390.24 145.592   8
  -6  -6   6 1830.28 164.719   4
  -6  -6   5 75.7382 22.7279   6
  -6  -6   5 27.3542 15.0666   2
   6   6  -5 55.1816 14.6254  10
   6  -6  -5 21.3370 11.1266  10
   6   6  -5 13.9024 20.9267  11
   6   6  -4 13.7656 21.9250  11
   6   6  -4 12.0806 11.0844  10
   6  -6  -4 30.3435 10.5812  10
  -6  -6   4 27.5487 18.0748   6
  -6  -6   4 13.2290 14.1659   2
  -6   6   4 44.5211 22.6957  14
  -6   6   3 129.507 28.2297  14
  -6  -6   3 84.9522 24.8240   6
   6   6  -3 70.4109 16.9451  10
   6  -6  -3 100.349 16.6342  10
  -6  -6   3 77.6857 12.2207  15
  -6  -6   3 81.2462 12.4221   9
   6   6  -3 59.1632 24.9679  11
  -6  -6   3 119.970 23.0876   2
  -6  -6   3 63.9238 18.7062   5
  -6   6   2 71.4036 20.9721   7
  -6  -6   2 40.0872 22.7116   6
   6   6  -2 83.6962 26.5704  11
   6  -6  -2 89.4151 15.8044  10
   6   6  -2 94.7687 18.6884  10
  -6  -6   2 57.0704 9.33976  15
   6   6  -2 59.9984 25.6497   8
  -6  -6   2 60.8763 12.4496   9
  -6   6   2 48.6054 21.6506   5
  -6  -6   2 79.2758 21.0803   5
  -6  -6   2 83.5173 22.4858   2
   6   6  -1 704.832 105.845   7
   6   6  -1 938.372 118.277   8
  -6   6   1 1016.06 101.740   7
  -6   6   1 1118.75 110.873   5
  -6  -6   1 1015.21 104.609   5
   6  -6  -1 980.040 100.642  10
   6   6  -1 1037.52 104.531  10
  -6  -6   1 907.364 98.4141   9
   6   6   0 1901.94 211.589   8
   6   6   0 1642.49 198.411   7
   6   6   0 2039.66 195.692  10
   6  -6   0 1635.41 189.537  10
  -6  -6   0 1854.23 188.964   9
   6   6   1 1160.88 152.175   8
   6   6   1 1253.87 143.934   7
  -6  -6  -1 1164.53 131.267   9
   6   6   1 1154.48 139.084  11
  -6  -6  -2 556.529 67.4107   9
   6   6   2 556.111 78.4275   7
   6   6   2 651.541 90.4158   8
   6   6   2 550.698 74.4978  11
  -6  -6  -3 996.388 94.2286   4
  -6  -6  -3 683.133 90.0483   9
   6   6   3 707.003 102.090   7
   6   6   3 620.220 105.379   8
   6   6   3 760.285 96.3113  11
  -6   6  -3 1042.93 99.4419  15
  -6  -6  -4 327.885 52.7810   9
   6   6   4 361.864 57.8279  11
  -6   6  -4 486.640 58.2507  15
  -6  -6  -4 390.967 52.3437   4
   6   6   5-14.6499 24.5856  11
  -6   6  -5 22.8102 25.0602  15
  -6  -6  -5 4.20508 20.0051   9
  -6  -6  -5-6.47630 21.5669   4
  -6  -6  -6 190.620 40.9757   9
   6   6   6 207.719 45.3117  11
  -6   6  -6 261.379 43.7184  15
  -6  -6  -7 111.630 35.8685   9
   6   6   7 199.829 43.3309  11
  -6   6  -7 202.720 41.5160  15
  -6   7  12 100.136 26.7102   3
  -6  -7  12 87.0899 28.2168   3
  -6  -7  12 125.840 32.6250   1
  -6  -7  11 682.592 78.5383   1
  -6  -7  11 702.000 94.3780   4
  -6  -7  11 573.966 74.1393   3
  -6   7  11 584.098 72.2722   3
   6  -7 -11 445.016 75.2406  12
  -6  -7  11 852.014 87.8254   2
  -6  -7  10-6.57030 31.2586   4
   6  -7 -10 8.62901 22.8593  12
  -6  -7  10 12.3705 19.5225   3
  -6   7  10 7.90355 16.6322   3
  -6  -7  10-11.6213 24.1719   1
  -6  -7  10 8.60036 24.2083   2
  -6  -7   9 155.042 34.0145   3
  -6   7   9 197.065 33.7084   3
  -6  -7   9 262.607 52.5938   4
  -6  -7   9 278.031 45.0829   1
  -6  -7   9 332.895 46.5287   2
  -6  -7   8-5.11776 16.5174   3
  -6   7   8 8.70377 13.7388   3
  -6  -7   8 31.1754 21.3028   6
  -6   7   8-2.66476 14.7892   8
  -6  -7   8 6.04177 26.9650   4
  -6  -7   8 4.30200 23.8698   1
  -6  -7   8 7.25251 20.4153   2
  -6  -7   7 21.3427 16.2083   3
  -6   7   7 12.1400 13.0328   3
  -6  -7   7 41.3943 22.1405   6
  -6   7   7 14.6281 12.3817   8
  -6  -7   7 16.7364 24.3869   4
  -6  -7   7 22.9654 19.8197   2
  -6  -7   6 254.874 45.4104   4
  -6   7   6 96.7978 32.6744  14
  -6   7   6 181.451 25.0650   8
  -6  -7   6 217.907 30.9886   3
  -6   7   6 149.084 27.2846   3
  -6  -7   6 280.695 35.8157   2
   6  -7  -6 145.585 33.9545  12
  -6  -7   6 227.838 38.0418   6
  -6   7   5 1894.22 159.983  14
  -6  -7   5 1166.97 146.862   3
  -6  -7   5 1466.29 150.999   2
  -6  -7   5 1574.72 162.054   4
  -6  -7   5 1540.31 156.930   6
   6   7  -4 412.504 63.4097  11
   6   7  -4 454.001 50.5518  10
   6  -7  -4 418.808 49.2178  10
  -6  -7   4 551.126 66.4702   4
  -6   7   4 585.904 62.5905  14
  -6  -7   4 403.109 54.9522   2
  -6  -7   4 491.080 62.4464   6
   6   7  -3 1987.57 176.781  10
   6  -7  -3 1618.59 174.072  10
  -6  -7   3 1573.34 172.215   9
  -6   7   3 2260.80 189.371  14
  -6  -7   3 1969.99 183.334   2
  -6  -7   3 1763.96 180.177   5
  -6   7   3 2026.87 187.105   5
  -6  -7   3 1941.63 191.199   6
  -6   7   2 97.0075 24.1106   5
  -6  -7   2 121.427 20.4972   5
  -6  -7   2 79.9069 25.9158   4
   6   7  -2 113.519 18.8756  10
   6  -7  -2 100.690 16.9105  10
  -6   7   2 77.9298 23.9972   7
  -6  -7   2 26.0144 25.5507   6
  -6   7   2 54.5277 25.2768  14
  -6  -7   2 67.6971 15.2381   9
   6   7  -2 95.4546 30.5718   8
  -6  -7   2 74.0759 22.5787   2
  -6  -7   1 1123.89 121.236   9
   6  -7  -1 1085.59 120.064  10
   6   7  -1 1530.85 125.846  10
   6   7  -1 1366.48 137.934  11
   6   7  -1 852.563 130.490   7
   6   7  -1 1082.06 140.587   8
  -6   7   1 1221.04 126.118   7
  -6  -7   1 1432.08 134.912   4
   6   7   0 16.2663 14.8377  10
   6  -7   0-2.01373 11.1987  10
  -6  -7   0 7.49836 19.5531   4
   6   7   0 66.0727 25.5039  11
   6   7   0 31.8909 23.7320   7
  -6  -7   0-2.25805 11.3947   9
   6   7   0 7.13982 25.4289   8
   6  -7   1 16.1174 14.9590  10
   6   7   1 78.2126 27.1150  11
   6   7   1 69.0615 28.7563   7
  -6  -7  -1 39.8899 16.5374   9
   6   7   1 53.2511 33.4291   8
  -6  -7  -1 84.7209 25.1302   4
   6   7   2 17.6936 21.8902  11
  -6  -7  -2 22.0389 18.8453   4
   6   7   2 12.2490 23.3288   7
  -6  -7  -2 3.05253 14.2618   9
   6   7   2 7.89039 30.9681   8
   6   7   3 324.294 58.9313  11
  -6  -7  -3 365.699 54.3996   9
   6   7   3 357.797 71.5385   8
  -6  -7  -3 447.423 59.0890   4
   6   7   3 401.317 68.8410   7
   6   7   4 55.9957 27.0884  11
  -6   7  -4 71.4769 30.2425  15
  -6  -7  -4 89.9101 26.8649   9
   6   7   4 8.42296 34.6395   8
   6   7   4 111.572 40.8966   7
  -6  -7  -4 80.8646 25.7166   4
   6   7   5 1587.58 201.827   8
   6   7   5 1567.51 183.806  11
  -6  -7  -5 1436.69 180.991   9
  -6   7  -6 129.104 36.6174  15
   6   7   6 71.0367 30.8431  11
  -6  -7  -6 33.5708 24.4920   9
  -6  -8  11 71.0760 41.6789   4
  -6   8  10 369.501 54.1608   3
  -6  -8  10 561.943 69.2193   1
  -6  -8  10 494.224 66.6337   2
  -6  -8  10 566.992 82.9366   4
  -6  -8   9 34.7197 36.2075   4
  -6  -8   9-4.50428 30.6299   1
  -6  -8   9 28.5151 22.9630   2
  -6  -8   9 4.19553 21.8993   6
  -6   8   9 4.35093 14.2447   3
   6  -8  -9 43.8514 23.9996  12
  -6  -8   8 1134.82 134.322   4
  -6   8   8 961.780 109.513   3
  -6  -8   8 1146.52 121.551   6
   6  -8  -8 793.026 116.599  12
  -6  -8   8 1288.62 121.995   2
  -6  -8   8 1430.25 130.947   1
   6  -8  -7 29.1737 21.0403  12
  -6  -8   7 18.7061 14.7489   3
  -6   8   7 19.5485 13.5115   3
  -6   8   7-3.94989 23.5210  14
  -6  -8   7 15.6156 20.0631   6
  -6  -8   7 23.4146 20.1885   2
  -6  -8   7 9.91609 27.1434   1
  -6  -8   7 6.34665 30.2323   4
  -6  -8   6 853.489 102.164   4
  -6  -8   6 854.157 87.3438   2
  -6   8   6 937.873 92.3356  14
   6  -8  -6 665.651 89.1846  12
  -6   8   6 663.944 78.1910   3
  -6  -8   6 741.432 80.4639   3
  -6  -8   6 702.767 88.6178   6
  -6  -8   5 153.343 41.8664   4
  -6   8   5 155.353 31.0251  14
  -6  -8   5 127.586 23.3040   3
  -6   8   5 86.2242 20.5076   3
  -6  -8   5 189.204 35.1315   6
  -6  -8   5 158.851 27.5417   2
  -6   8   4 18.2365 16.9028   5
  -6  -8   4 8.79555 12.4326   5
  -6  -8   4 5.36575 25.0374   4
  -6  -8   4 25.5011 21.4296   6
  -6  -8   4 36.1484 16.9807   2
   6  -8  -4 4.66971 8.61230  10
  -6   8   4 20.4644 19.7739  14
  -6   8   3-2.93882 17.6842   5
  -6  -8   3-6.17784 12.8482   5
   6   8  -3 11.6321 9.28455  10
   6  -8  -3-1.10860 7.89386  10
  -6   8   3-4.93017 20.4465   7
  -6  -8   3-4.72333 20.5939   6
  -6  -8   3 17.1078 16.5017   2
  -6   8   3-7.19188 21.3660  14
  -6   8   2 471.975 53.5976  14
   6   8  -2 266.212 50.8108  11
   6   8  -2 312.648 36.3718  10
   6  -8  -2 284.560 34.3748  10
  -6  -8   2 277.319 35.9361   9
  -6  -8   2 312.253 44.1705   2
  -6   8   2 267.201 46.7388   7
   6   8  -2 231.423 53.1261   8
  -6  -8   2 300.926 50.9826   4
  -6   8   2 346.420 44.0256   5
  -6   8   1 22.6974 23.0641  14
   6   8  -1 22.8765 13.6328  10
   6  -8  -1 5.60549 10.1083  10
   6   8  -1-4.85248 22.6362  11
  -6   8   1 15.7954 17.8054   7
   6   8  -1 27.5624 31.4544   8
  -6  -8   1 6.19950 10.8082   9
  -6  -8   1-4.62211 21.1101   4
   6  -8   0 1359.08 157.623  10
   6   8   0 1821.34 162.581  10
  -6  -8   0 1356.38 161.050   9
  -6  -8   0 1940.53 177.224   4
   6   8   0 1617.86 187.292   8
   6   8   0 1425.07 177.614   7
  -6   8   0 2233.24 176.327  14
   6   8   0 1749.98 175.616  11
  -6  -8  -1-9.09076 22.0521   4
   6   8   1-6.43220 25.2332   7
   6   8   1-4.60049 22.7446  11
   6  -8   1 7.84009 12.2303  10
   6   8   1 5.33967 15.2423  10
  -6  -8  -1 2.88283 14.7719   9
   6   8   1 15.8286 31.9470   8
  -6  -8  -2 625.368 82.9711   9
   6   8   2 704.867 90.0193  11
   6   8   2 764.081 107.998   8
   6   8   2 686.997 99.1617   7
  -6  -8  -2 1012.34 97.3586   4
  -6   8  -3-12.3493 26.5630  15
  -6  -8  -3-7.30141 18.7050   9
   6   8   3 8.38838 32.9062   8
   6   8   3 22.0573 21.4017  11
  -6  -8  -3 4.44357 22.3713   4
   6   8   3 14.0339 30.5938   7
  -6   8  -4 373.640 53.6437  15
  -6  -8  -4 209.948 43.5815   9
   6   8   4 307.305 64.0666   8
   6   8   4 313.794 50.1181  11
  -6  -8  -4 289.543 48.2928   4
   6   8   4 198.618 55.4513   7
  -6  -8  -5 4.48483 21.3376   9
   6   8   5-17.5033 35.3281   8
  -6   8  -5-13.1648 28.9279  15
   6   8   5 22.6516 32.1284   7
   6   8   5 18.1054 23.9798  11
   6   8   6 83.8397 46.1567   7
   6   8   6 99.2171 31.9153  11
  -6  -9  10 181.507 50.7435   4
  -6   9  10 131.529 35.5968  14
  -6  -9   9 34.0518 27.6490   6
   6  -9  -9 36.0473 24.8306  12
  -6   9   9 28.3869 24.0817  14
  -6  -9   9 7.44562 37.6186   4
  -6  -9   9 54.3716 35.0205   1
  -6  -9   9 40.9729 26.3420   2
  -6  -9   8 32.8994 24.6717   6
   6  -9  -8 17.5708 19.8976  12
  -6   9   8 43.8844 22.7397  14
  -6  -9   8 72.3775 37.8711   4
  -6  -9   8 37.1340 23.4175   2
  -6  -9   8 46.9045 31.9324   1
  -6  -9   7 76.9065 28.3191   6
   6  -9  -7 30.0220 21.9580  12
  -6   9   7 51.3987 24.0087  14
  -6  -9   7 13.7854 31.0172   4
  -6  -9   7 47.1930 22.3468   2
  -6  -9   7 27.1114 32.4635   1
  -6  -9   6 53.5669 24.7104   6
   6  -9  -6 37.7651 23.1769  12
  -6   9   6 64.5886 25.3716  14
  -6  -9   6 6.21524 17.3114   2
  -6  -9   6 59.2590 34.4748   4
   6  -9  -5 879.513 115.901  12
  -6  -9   5 978.946 116.873   6
  -6  -9   5 1032.69 127.685   4
  -6  -9   5 1053.46 111.736   2
  -6   9   5 1177.09 116.201  14
  -6  -9   4 371.867 55.7066   6
  -6  -9   4 403.297 65.7945   4
  -6  -9   4 330.314 47.3417   2
  -6   9   4 368.152 52.4808  14
   6   9  -3 650.501 86.6404  11
  -6   9   3 621.876 80.0258  14
  -6  -9   3 681.552 86.1005   6
  -6   9   3 607.549 84.9629   7
  -6  -9   3 668.131 76.4569   2
   6   9  -2 93.8763 33.9605  11
  -6  -9   2 114.020 38.4364   4
  -6   9   2 126.681 32.2037  14
  -6   9   2 84.6126 28.8205   7
  -6  -9   1 568.681 80.4474   4
  -6   9   1 633.124 75.3989  14
   6   9  -1 512.857 77.7767  11
  -6   9   1 611.334 73.9905   7
   6   9  -1 504.850 85.2733   8
  -6  -9   0 69.3956 32.1437   4
   6   9   0 14.7854 24.4726  11
   6   9   0 58.5879 33.7591   7
  -6  -9   0 67.2661 19.0121   9
   6   9   0 83.1290 40.3714   8
  -6  -9  -1 92.9685 32.9358   4
  -6  -9  -1 71.0358 22.0235   9
   6   9   1 104.357 41.2776   8
   6   9   1 115.339 34.6338  11
   6   9   1 96.9535 37.6346   7
  -6  -9  -2 9.98909 25.1943   4
  -6  -9  -2 52.1197 21.4993   9
   6   9   2 83.8522 42.5109   8
  -6   9  -2 148.248 38.3463  15
   6   9   2 65.5965 30.6465  11
   6   9   2 36.0379 30.3074   7
  -6  -9  -3 172.278 40.0236   4
  -6  -9  -3 99.7596 31.1640   9
   6   9   3 180.115 54.1150   8
   6   9   3 176.804 37.7640  11
   6   9   3 175.856 47.8338   7
  -6  -9  -4 98.2719 34.1585   4
  -6   9  -4 169.695 44.2430  15
  -6  -9  -4 96.4055 30.4511   9
   6   9   4 121.632 47.9855   8
   6   9   4 92.7037 34.0140  11
   6   9   4 159.146 45.1634   7
   6   9   5 481.223 70.4672  11
  -6  -9  -5 500.221 71.2922   9
   6   9   5 664.148 94.2967   7
  -6  10   9 228.762 38.6327  14
  -6  10   8 130.138 32.0274  14
  -6 -10   8 177.343 53.2845   4
  -6 -10   8 167.616 37.5531   6
  -6 -10   8 150.576 34.3361   2
   6 -10  -7 165.221 37.0020  12
  -6  10   7 155.154 33.5878  14
  -6 -10   7 149.197 49.7324   4
  -6 -10   7 207.341 40.2281   6
  -6 -10   7 171.560 34.6298   2
  -6 -10   7 168.520 48.0087   1
   6 -10  -6 136.919 33.9848  12
  -6  10   6 144.668 32.1380  14
  -6 -10   6 122.858 42.9659   4
  -6 -10   6 98.4403 30.3881   6
  -6 -10   6 134.291 30.6378   2
   6 -10  -5 236.964 44.2254  12
  -6  10   5 231.919 42.7092  14
  -6 -10   5 249.286 56.1254   4
  -6 -10   5 238.380 45.1902   6
  -6 -10   5 272.019 39.7933   2
  -6  10   4 12.2869 30.9661   7
  -6 -10   4 32.5723 26.2353   6
  -6  10   4 17.3724 23.4242  14
  -6 -10   4 8.52179 18.3928   2
  -6  10   3 26.8416 27.5962   7
  -6 -10   3 6.39451 29.8891   4
  -6  10   3 35.8383 25.1566  14
  -6 -10   2 49.4465 35.1171   4
  -6  10   2 51.5082 27.0842  14
   6  10  -2 37.9362 30.8771  11
  -6  10   2 61.6374 29.2779   7
  -6  10   1 199.258 40.7611  14
   6  10  -1 120.555 39.0087  11
  -6 -10   1 173.623 43.7685   4
   6  10  -1 148.843 48.3132   8
  -6 -10   0 239.398 53.6447   4
   6  10   0 326.240 64.0598   8
   6  10   0 313.559 54.9235  11
   6  10   0 267.272 60.2342   7
  -6 -10  -1 325.521 67.6250   4
   6  10   1 490.130 84.0239   8
   6  10   1 449.746 69.7121  11
   6  10   1 468.373 79.0698   7
  -6 -10  -2 38.5030 29.8649   4
   6  10   2 66.9068 41.4307   8
  -6  10  -2 169.832 39.4365  15
   6  10   2 115.025 35.1382  11
   6  10   2 84.2313 40.1191   7
  -6 -10  -3 126.681 37.0425   4
  -6 -10  -3 91.8698 27.8475   9
   6  10   3 154.613 51.5143   7
   6  10   3 112.160 35.4653  11
  -6 -10  -4 64.8596 26.0908   9
  -6  11   7 2.98629 21.4526  14
  -6  11   6 37.6745 24.7080  14
   6 -11  -5 63.7287 26.2772  12
  -6  11   5 54.4423 33.5691   7
  -6  11   5 71.3968 27.5949  14
   6 -11  -4 250.870 51.0578  12
  -6  11   4 314.116 61.1309   7
  -6  11   4 405.734 53.3370  14
  -6 -11   3 34.7087 39.7005   4
  -6  11   3 45.4022 31.5770   7
  -6  11   3 6.93056 26.8930  14
  -6 -11   2 288.740 60.4671   4
  -6  11   2 298.976 54.6817   7
  -6  11   2 343.025 51.8050  14
   6  11  -1 69.7479 32.5620  11
  -6 -11   1 19.4574 32.9270   4
  -6  11   0 109.826 37.3872  15
   6  11   0 62.0357 34.6678  11
  -6 -11   0 88.0235 40.0443   4
  -6 -11  -1-12.1575 32.7517   4
   6  11   1 35.3457 30.0403  11
   6  11   1 45.5720 41.5403   7
  -6 -11  -2 128.136 42.1220   4
  -6  12   4 57.1749 26.0644  14
  -6  12   4 62.3504 37.9279   7
  -6  12   3 85.5314 38.4462   7
   7   0 -14 566.266 72.3544  12
  -7   0  14 613.191 75.4404   2
   7   0 -13 26.2628 19.0553  12
  -7   0  13-10.5934 20.1781   2
  -7   0  13 14.3278 21.8109   3
   7   0 -12 30.9651 18.9961  12
  -7   0  12 46.8399 21.9861   2
  -7   0  12 62.1059 24.2349   3
  -7   0  11-3.16414 18.5578   2
  -7   0  11 8.32596 19.4039   3
   7   0 -11-2.35777 14.0093  12
   7   0 -11 5.37699 12.5315   9
  -7   0  10 603.941 68.7992   2
   7   0 -10 583.437 64.1099  12
  -7   0  10 470.071 69.3838   3
   7   0  -9-2.01656 11.3687  12
  -7   0   9 3.78087 17.9974   3
  -7   0   9 22.9253 14.4413   2
  -7   0   8 4984.31 439.741   2
  -7   0   8 4338.04 427.861   1
   7   0  -8 5161.63 435.397  12
  -7   0   8 4031.31 434.484  11
   7   0  -7 10.1122 11.0364  10
   7   0  -7 4.29622 9.45632   9
  -7   0   7 6.11211 13.3361   6
  -7   0   7 3.83742 10.0144   8
  -7   0   7 2.38271 6.11799   1
   7   0  -7-3.77908 9.52927  12
   7   0  -6 1567.93 214.561  11
   7   0  -6 1857.63 217.072  10
   7   0  -6 2784.47 214.882   9
  -7   0   6 2385.37 223.064   6
   7   0  -6 2205.16 216.613  12
  -7   0   6 2573.97 223.258   2
   7   0  -5-1.24377 7.19921   9
   7   0  -5-2.55721 13.1027  11
  -7   0   5-1.94618 10.1427   8
   7   0  -5 2.57375 10.3899  10
  -7   0   5-3.26593 13.1837   6
   7   0  -4 1487.50 131.831   9
   7   0  -4 1327.64 139.272  11
  -7   0   4 1467.18 144.632   6
   7   0  -4 987.458 135.654  10
  -7   0   3 4.28927 14.7215   6
  -7   0   3 8.37973 6.47602   7
   7   0  -3 3.02276 9.10685  10
   7   0  -3-3.42018 12.6117  11
  -7   0   2 2075.15 211.092   9
   7   0  -2 2476.88 206.669   9
   7   0  -2 2164.16 207.827   8
  -7   0   2 2700.94 225.913   5
  -7   0   1 7.73822 10.4163   9
  -7   0   1-28.3607 19.6050   5
  -7   0   1 7.48216 12.1032  14
   7   0  -1-2.85588 11.5318   8
  -7   0   0 5749.96 501.938  14
  -7   0   0 6279.24 518.702   5
  -7   0  -1-3.13081 13.9728   9
  -7   0  -1 5.84186 11.8646  14
  -7   0  -2 4099.02 404.635   9
  -7   0  -3 3.75431 14.7405   9
  -7   0  -3 8.29498 11.0663  15
  -7   0  -4 689.477 88.7829   9
  -7   0  -4 766.486 78.9088  15
  -7   0  -5 13.5650 19.2677   9
  -7   0  -5 9.84541 13.0105  15
  -7   0  -6 114.324 37.1891   9
  -7   0  -6 209.049 28.1322  15
  -7   0  -7 5.48096 22.1302   9
  -7   1  14 148.199 32.3634   2
   7  -1 -14 155.382 34.1301  12
   7  -1 -13 1344.43 151.606  12
   7   1 -13 1448.22 149.529  12
  -7  -1  13 1148.87 155.745   3
  -7  -1  13 1634.18 157.734   2
  -7   1  13 1675.58 154.654   2
   7  -1 -12 245.284 35.5344  12
   7   1 -12 200.704 33.2633  12
  -7  -1  12 181.723 36.4135   2
  -7   1  12 251.686 37.1911   2
  -7  -1  12 135.076 36.8826   3
  -7  -1  11 1043.72 151.139   3
  -7  -1  11 1602.30 153.639   2
  -7   1  11 1593.68 151.537   2
   7   1 -11 1571.45 146.468  12
   7  -1 -11 1341.56 148.513  12
   7   1 -10 340.476 41.7045  12
   7  -1 -10 380.091 46.7623  12
   7   1 -10 347.017 38.5174   9
  -7  -1  10 276.892 49.7250   3
  -7   1  10 402.521 48.2525   2
  -7  -1  10 325.642 47.6717   2
   7   1  -9 1020.54 94.6680   9
   7   1  -9 998.317 98.1408  12
   7  -1  -9 888.533 101.082  12
  -7  -1   9 891.770 94.8071   1
  -7  -1   9 791.476 105.904   3
  -7  -1   9 1023.24 105.083   2
  -7   1   9 958.451 103.082   2
  -7  -1   8 95.5249 22.1919   2
  -7   1   8 89.5232 21.9050   2
  -7  -1   8 58.9559 13.6378   1
   7  -1  -8 76.0250 18.0505  12
   7   1  -8 109.494 17.4136  12
   7   1  -8 87.8647 13.9246   9
  -7  -1   7 658.356 73.0506   2
   7  -1  -7 509.690 69.3056  10
   7   1  -7 684.864 63.6835   9
  -7  -1   7 579.126 73.2482   6
  -7   1   7 667.245 73.7082   6
   7  -1  -7 682.618 71.7637  12
   7   1  -7 691.687 66.8950  12
  -7  -1   7 539.264 65.7205   1
  -7   1   7 595.420 72.0698   2
   7  -1  -6 269.936 34.1840  11
   7   1  -6 179.639 35.5405  11
   7  -1  -6 243.678 36.0364  10
   7   1  -6 318.909 30.0484   9
  -7  -1   6 226.968 39.2613   6
  -7   1   6 331.149 41.3672   6
  -7   1   6 239.136 27.9961   1
  -7   1   6 346.585 41.7767   2
   7   1  -6 322.905 34.0888  12
   7  -1  -6 313.304 38.9943  12
  -7   1   6 358.302 35.1993   8
  -7  -1   6 274.692 37.2416   8
   7  -1  -5 2212.20 261.565  10
   7   1  -5 2747.90 254.878   9
  -7  -1   5 3032.73 269.956   6
  -7   1   5 2718.07 266.960   6
   7   1  -5 2346.88 264.341  11
   7  -1  -5 2337.87 260.233  11
  -7   1   5 3100.60 259.609   8
   7  -1  -4 1195.27 153.696  10
   7   1  -4 1627.61 147.512   9
   7  -1  -4 1677.93 152.348   9
  -7  -1   4 1493.27 161.520   6
  -7   1   4 1615.06 160.971   6
   7   1  -4 1369.58 156.997  11
   7  -1  -4 1339.44 154.607  11
  -7  -1   4 1631.76 160.674   2
   7   1  -3 6621.76 618.605   9
   7  -1  -3 7328.88 622.767   9
   7   1  -3 6166.19 630.534  11
   7  -1  -3 5442.73 627.663  11
  -7  -1   3 8218.82 641.141   6
  -7   1   3 7214.24 636.883   6
  -7  -1   3 7023.45 621.549   7
   7  -1  -3 4554.40 624.065  10
   7  -1  -2 613.623 85.4709  10
  -7  -1   2 784.668 83.4858   9
  -7   1   2 684.988 88.4860  14
   7   1  -2 766.131 85.4660   8
  -7  -1   2 1068.35 99.1390   5
   7   1  -2 919.127 94.6814  11
   7   1  -1 1279.68 170.588   8
   7  -1  -1 1291.59 165.340   8
  -7  -1   1 1496.92 167.874   9
   7   1  -1 1766.34 164.201   9
  -7   1   1 1396.93 169.410   9
  -7  -1   1 2393.82 173.191  14
  -7   1   1 2383.69 175.879  14
  -7  -1   1 2081.16 184.275   5
   7   1   0 32.1178 19.0972   8
  -7  -1   0 23.9358 13.7225   9
  -7   1   0 6.04820 12.9691   9
  -7  -1   0 18.4245 18.1416   5
  -7  -1   0 18.3551 10.1623  14
  -7   1   0 12.7796 12.9695  14
  -7   1  -1 26.2768 14.5564   9
  -7  -1  -1 37.8195 16.5814   9
  -7   1  -1 18.7101 14.3128  14
  -7  -1  -1 29.2506 11.5492  14
  -7   1  -2 68.4413 22.8217   9
   7   1   2 82.7100 12.3787   7
  -7  -1  -2 57.3078 19.5275   9
  -7   1  -3 2054.61 225.352   9
  -7  -1  -3 2072.93 223.548   9
  -7   1  -3 2485.26 218.641  15
  -7  -1  -3 2142.40 213.265  15
   7   1   3 2159.83 214.258   7
  -7  -1  -4 577.673 58.9312  15
  -7   1  -4 606.745 63.6126  15
  -7   1  -4 389.376 68.1337   9
  -7  -1  -4 565.086 71.4722   9
  -7   1  -5 2167.26 201.314  15
  -7  -1  -5 2125.14 197.309  15
  -7   1  -5 1743.15 210.719   9
  -7  -1  -5 1691.21 208.735   9
  -7  -1  -6 216.519 47.2198   9
  -7   1  -6 353.191 41.4251  15
  -7   1  -6 300.422 52.1850   9
  -7   1  -7 1132.43 124.477   9
  -7  -1  -7 887.688 117.418   9
  -7   2  14 161.009 31.7584   2
   7  -2 -14 181.587 36.4965  12
   7  -2 -13 201.007 37.1253  12
  -7   2  13 256.588 36.1473   2
  -7  -2  13 230.340 42.2233   2
  -7  -2  13 135.408 37.8625   3
  -7   2  13 170.497 38.2817   3
   7  -2 -12 86.7144 26.2356  12
  -7  -2  12 133.840 31.2430   2
  -7   2  12 170.713 28.8212   2
  -7  -2  12 104.079 31.7129   3
  -7   2  12 125.946 31.0505   3
   7  -2 -11 145.618 30.0100  12
   7   2 -11 174.912 25.1810  12
  -7  -2  11 143.775 33.6724   3
  -7   2  11 121.646 32.3653   3
  -7  -2  11 191.376 34.1691   2
  -7   2  11 137.234 28.0001   2
   7   2 -10 231.896 27.7698  12
   7  -2 -10 133.936 30.4486  12
  -7  -2  10 191.225 35.2760   2
  -7   2  10 209.758 33.9097   2
  -7  -2  10 212.143 27.4268   1
  -7  -2  10 249.076 39.6274   3
  -7   2  10 171.211 34.6114   3
   7   2  -9 1185.63 111.959  12
   7  -2  -9 1029.74 118.552  12
  -7  -2   9 884.934 120.867   3
  -7   2   9 967.521 121.283   3
  -7  -2   9 1253.76 123.163   2
  -7   2   9 1346.11 121.073   2
  -7  -2   9 1094.90 113.111   1
  -7  -2   8 1988.96 231.097   3
  -7   2   8 2016.11 230.440   3
  -7   2   8 2615.02 230.655   2
  -7  -2   8 2339.70 224.054   1
   7  -2  -8 2254.55 229.026  12
   7   2  -8 2320.56 220.695  12
  -7   2   7 1789.82 181.180   2
   7  -2  -7 1560.51 179.178  12
   7   2  -7 1809.10 171.559  12
  -7  -2   7 1993.04 185.436   6
  -7   2   7 2151.85 182.401   6
   7   2  -7 1589.57 178.352  10
   7  -2  -7 1589.37 177.667  10
   7   2  -6 662.574 70.3530  12
   7   2  -6 624.132 76.6694  10
   7  -2  -6 641.127 76.3766  10
  -7   2   6 877.090 72.9433   8
   7   2  -6 607.951 79.5975  11
  -7   2   6 703.697 79.0589   6
  -7  -2   6 720.364 80.4332   2
   7   2  -5 710.677 85.4498  11
   7  -2  -5 719.439 77.5747  11
  -7   2   5 796.211 85.2910   6
   7   2  -5 644.831 80.9891  10
   7  -2  -5 642.487 80.0737  10
   7   2  -5 787.153 75.2596  12
  -7  -2   5 909.470 87.5585   2
   7  -2  -4 280.868 39.3788  11
   7   2  -4 318.725 45.2699  11
   7  -2  -4 261.947 39.2314  10
   7   2  -4 259.689 40.2916  10
  -7   2   4 309.629 44.1840   6
  -7  -2   4 378.851 46.2734   2
  -7  -2   4 368.233 39.7952   7
   7   2  -3 12.3631 10.2511  10
   7   2  -3 15.0882 16.0906  11
   7  -2  -3 11.0216 9.15355  10
   7  -2  -2 926.576 127.441  10
   7   2  -2 906.566 128.515  10
  -7  -2   2 1230.75 124.794   9
   7   2  -2 1351.13 136.956  11
   7   2  -2 1056.73 129.537   8
  -7   2   2 1750.81 145.307   5
  -7  -2   2 1424.22 138.151   5
  -7   2   2 2070.16 143.409  14
   7   2  -1 875.520 120.147  11
  -7   2   1 1484.98 132.432   5
  -7  -2   1 1212.94 124.745   5
  -7  -2   1 1411.90 114.379  14
  -7   2   1 1394.16 120.075  14
  -7  -2   1 969.380 111.605   9
   7   2  -1 767.913 117.019   8
   7  -2  -1 1030.93 107.699   8
   7   2  -1 1025.30 106.642  12
  -7  -2   0 593.882 75.4868   9
  -7   2   0 538.741 77.9491   9
   7   2   0 581.825 86.9147   8
  -7   2   0 829.939 92.3375   5
  -7  -2   0 851.117 89.4906   5
  -7  -2   0 786.671 73.5256  14
  -7   2   0 747.718 80.6804  14
  -7   2  -1 3916.59 325.791  14
  -7  -2  -1 3334.18 315.307  14
  -7   2  -1 2946.77 325.413   9
  -7  -2  -1 2925.23 321.476   9
   7   2   2 2277.97 227.839   7
  -7  -2  -2 2505.08 224.373  15
  -7   2  -2 2198.00 236.586   9
  -7  -2  -2 1995.24 232.040   9
   7   2   3 755.219 92.5419   7
  -7   2  -3 903.443 94.5214  15
  -7  -2  -3 924.919 86.1774  15
  -7   2  -3 814.196 99.8824   9
  -7  -2  -3 773.256 96.3986   9
  -7  -2  -4 288.237 47.7322   9
  -7   2  -4 372.327 44.7985  15
  -7   2  -4 297.031 49.8919   9
  -7  -2  -5 51.4026 21.8617   9
  -7   2  -5 58.0514 20.5101  15
  -7   2  -5 4.83364 20.8772   9
  -7  -2  -6 33.3406 23.7261   9
  -7   2  -6 26.7787 18.3228  15
  -7   2  -6 36.8092 28.0074   9
  -7  -2  -7 414.091 66.8305   9
  -7   2  -7 519.197 57.6908  15
  -7   2  -7 341.213 64.7275   9
  -7  -3  13 298.576 51.4277   3
  -7   3  13 241.782 45.5647   3
   7  -3 -13 281.405 46.3073  12
  -7   3  13 247.503 40.3724   2
  -7  -3  13 381.624 53.8250   2
  -7   3  12 1196.14 122.243   2
  -7  -3  12 1003.43 128.487   3
  -7   3  12 1021.98 125.826   3
   7  -3 -12 1059.75 125.589  12
  -7  -3  11 66.9620 26.0839   3
  -7   3  11 52.5665 24.2560   3
  -7   3  11 118.538 23.9601   2
  -7  -3  11 81.6307 19.4425   1
  -7  -3  11 149.921 31.2990   2
  -7  -3  11 142.010 33.9369   4
   7  -3 -11 95.7512 26.7470  12
   7  -3 -10 1055.02 118.370  12
  -7   3  10 1016.75 119.326   3
  -7  -3  10 1043.42 121.496   3
  -7  -3  10 1156.15 113.078   1
  -7   3  10 1104.31 115.991   2
   7  -3  -9 176.242 30.4158  12
   7   3  -9 152.330 18.9703  12
  -7  -3   9 103.260 28.3081   3
  -7   3   9 129.814 29.2887   3
  -7   3   9 149.601 28.2338   2
  -7  -3   9 154.828 25.6112   1
  -7  -3   8 31.6242 16.0640   2
  -7   3   8 2.69065 12.4619   2
  -7  -3   8 60.7253 18.4485   1
   7  -3  -8 38.4306 17.3684  12
  -7   3   8 33.3736 15.0102   6
   7   3  -8 23.8579 7.44751  12
  -7  -3   8-7.16719 16.8394   3
  -7   3   8 22.3164 17.8151   3
   7   3  -7 265.499 26.5437  12
   7   3  -7 248.848 36.0667  10
   7  -3  -7 243.593 34.5619  10
   7  -3  -7 201.570 36.4798  12
  -7   3   7 236.320 35.2575   6
  -7  -3   7 267.470 38.7188   2
   7   3  -6 1017.43 104.003  12
   7  -3  -6 941.070 111.807  10
   7   3  -6 1085.72 114.292  10
  -7   3   6 1364.52 106.794   8
  -7  -3   6 1078.91 116.664   2
  -7   3   6 1125.68 115.350   6
   7   3  -6 908.606 117.778  11
   7   3  -5 79.0490 24.5165  11
   7  -3  -5 106.162 16.2900  11
  -7   3   5 132.297 24.5200   6
  -7  -3   5 113.371 26.7153   6
   7   3  -5 86.5272 19.8342  10
   7  -3  -5 115.643 21.4429  10
   7   3  -5 112.101 12.3012  12
  -7  -3   5 115.290 24.2775   2
   7  -3  -4 3350.46 321.344  11
   7   3  -4 3800.91 332.823  11
   7  -3  -4 3557.39 324.119  10
   7   3  -4 3617.81 326.368  10
  -7   3   4 2987.56 312.372   1
  -7  -3   4 4199.96 331.613   2
  -7   3   4 3664.06 328.776   6
  -7  -3   4 4367.69 337.434   6
   7   3  -3 1411.19 123.076  12
   7   3  -3 1400.72 140.642  11
   7   3  -3 1197.77 134.007  10
   7  -3  -3 1153.56 131.606  10
  -7  -3   3 1267.52 127.070   9
  -7   3   3 943.477 135.765  14
  -7   3   3 1223.16 123.203   1
   7   3  -3 1068.38 133.892   8
  -7  -3   3 1625.13 147.969   6
   7   3  -2 3274.68 283.126  12
   7   3  -2 3273.33 302.208  11
   7   3  -2 2499.93 294.435  10
   7  -3  -2 2693.72 292.720  10
  -7  -3   2 3225.54 288.756   9
  -7   3   2 5234.57 308.916  14
  -7   3   2 2656.72 283.044   1
  -7   3   2 2869.05 281.478   7
   7   3  -2 2391.69 295.660   8
  -7   3   2 3839.75 308.819   5
  -7  -3   2 1930.04 298.431   6
  -7  -3   2 3733.45 304.158   5
   7   3  -1 467.920 60.0929  11
   7   3  -1 325.104 52.9790  10
   7  -3  -1 304.224 50.4146  10
  -7  -3   1 365.603 46.2896   9
  -7  -3   1 474.001 47.3542  14
  -7   3   1 629.298 59.8284  14
   7   3  -1 338.519 56.2832   8
  -7   3   1 600.469 67.3716   5
  -7  -3   1 424.738 57.6775   5
  -7   3   1 363.895 42.2776   1
  -7   3   0 549.246 68.5097   5
  -7  -3   0 555.639 64.1404   5
  -7  -3   0 350.781 50.5408   9
  -7  -3   0 446.179 47.0010  14
  -7   3   0 539.638 59.6524  14
   7   3   0 359.473 63.5289   8
   7   3   0 431.852 46.6862  12
   7   3   0 479.160 64.8872  11
  -7   3  -1 26.5062 17.3759   9
  -7  -3  -1 52.5777 16.7072   9
   7   3   1 44.9820 23.2312   8
  -7   3  -1 27.4068 17.1286  14
   7   3   1 59.2961 15.7408   7
   7   3   2 366.555 49.3447   7
  -7  -3  -2 444.173 52.4758   9
  -7   3  -2 459.326 57.3763   9
  -7  -3  -2 385.750 40.5623  15
   7   3   3 302.645 48.7037   7
  -7   3  -3 450.938 50.8567  15
  -7   3  -3 318.141 52.2540   9
  -7  -3  -3 368.922 50.0256   9
  -7   3  -4 2014.83 174.137  15
  -7   3  -4 1489.50 177.517   9
  -7  -3  -4 1458.80 173.881   9
  -7  -3  -5 214.696 39.8658   9
  -7   3  -5 270.168 38.9083  15
  -7   3  -5 171.836 41.0045   9
  -7   3  -6 1994.98 180.654  15
  -7   3  -6 1650.10 189.541   9
  -7  -3  -6 1487.83 185.088   9
  -7  -3  -7 83.8479 32.3241   9
  -7   3  -7 124.392 29.9262  15
  -7   3  -8 421.324 56.9660  15
   7  -4 -13 143.915 34.5059  12
  -7   4  12 45.0722 19.4111   2
  -7  -4  12 76.7279 28.8196   2
   7  -4 -12 44.8581 23.3688  12
  -7  -4  12 35.3956 25.9781   3
  -7   4  12 38.5701 23.9027   3
   7  -4 -11 182.282 37.5420  12
  -7  -4  11 206.879 32.6557   1
  -7   4  11 171.549 33.0554   2
  -7  -4  11 204.525 39.0799   3
  -7   4  11 189.737 36.7027   3
  -7  -4  10-26.8223 23.2968   4
  -7  -4  10 9.84682 16.5626   1
  -7   4  10-2.51650 14.3671   2
  -7  -4  10-7.73891 18.7731   3
  -7   4  10 10.1073 16.6574   3
   7  -4 -10-3.69788 18.9475  12
  -7  -4   9 1682.61 160.097   1
  -7  -4   9 1605.66 164.874   3
  -7   4   9 1487.07 161.209   3
   7  -4  -9 1245.58 160.333  12
  -7  -4   9 1763.48 165.528   2
  -7  -4   8 106.099 25.4172   2
  -7  -4   8 71.1292 24.4057   1
  -7   4   8 107.008 22.0318   6
  -7  -4   8 109.016 25.4901   3
  -7   4   8 97.1735 23.1932   3
   7  -4  -8 74.6266 22.9052  12
   7  -4  -7 2463.11 321.415  12
  -7  -4   7 3588.04 324.809   2
  -7  -4   7 3944.89 329.879   6
  -7   4   7 3879.35 321.126   6
   7  -4  -7 2939.79 317.869  10
   7   4  -7 3168.55 320.097  10
   7   4  -6 93.4859 31.0162  11
  -7  -4   6 228.621 32.6593   2
  -7   4   6 185.930 27.8498   6
  -7  -4   6 245.423 36.2952   6
   7   4  -6 172.431 27.3346  10
   7  -4  -6 144.521 25.1680  10
   7   4  -5 1083.73 127.353  11
   7  -4  -5 986.220 109.300  11
  -7  -4   5 1484.81 125.909   2
  -7  -4   5 1503.19 131.287   6
   7   4  -5 1416.82 121.116  10
   7  -4  -5 1291.72 118.404  10
   7   4  -4 17.3349 19.7792  11
   7  -4  -4-4.54277 11.8451  10
   7   4  -4-13.6404 14.4585  10
   7  -4  -4-7.61818 10.8814  11
  -7  -4   4 3.24085 13.7968   2
  -7  -4   4-4.32122 15.9293   6
  -7   4   3 165.091 32.2935  14
   7   4  -3 130.528 13.0944  12
   7   4  -3 141.244 31.0172  11
   7  -4  -3 134.623 22.7636  10
   7   4  -3 133.927 24.5626  10
  -7  -4   3 121.627 17.6827   9
  -7  -4   3 70.1003 16.0151  15
   7   4  -3 140.709 28.6451   8
  -7  -4   3 114.368 27.8280   2
  -7  -4   3 183.997 35.4644   6
  -7   4   2 165.875 30.7757  14
   7   4  -2 145.169 14.7139  12
   7   4  -2 146.398 30.2385  11
  -7   4   2 142.560 32.6476   5
  -7  -4   2 152.290 30.4297   5
  -7  -4   2 111.842 18.7232   9
   7  -4  -2 91.7120 21.1734  10
   7   4  -2 114.006 24.9858  10
  -7  -4   2 97.5031 15.0859  15
   7   4  -2 84.4834 27.2718   8
  -7   4   2 178.613 18.6483   7
  -7   4   2 101.941 15.9327   1
   7  -4  -2 107.389 20.0266   6
  -7  -4   2 29.1237 25.4495   6
   7   4  -1 2391.01 221.597  12
   7   4  -1 2383.74 240.674  11
   7  -4  -1 1912.37 230.306  10
   7   4  -1 1717.03 232.332  10
  -7  -4   1 2110.23 226.305   9
   7   4  -1 1991.99 241.465   8
  -7  -4   1 2033.04 220.374  15
  -7   4   1 3284.42 242.123  14
  -7  -4   1 3053.10 225.306  14
  -7   4   1 3127.76 249.743   5
  -7  -4   1 2787.12 239.999   5
   7   4   0 283.804 43.7903  11
  -7  -4   0 154.460 27.7217   9
   7   4   0 150.755 40.7943   8
   7   4   0 211.478 32.3866   7
   7   4   0 221.631 24.8399  12
  -7  -4   0 203.599 22.5113  14
  -7   4   0 259.980 39.9574  14
  -7   4   0 304.421 47.2582   5
  -7  -4   0 176.080 35.7812   5
   7   4   1 3157.45 347.504   8
   7   4   1 3130.85 330.078   7
   7   4   1 2964.62 337.971  11
  -7  -4  -1 2962.48 327.071   9
  -7   4  -2-4.28367 16.8261   9
  -7  -4  -2 21.0726 16.7229   9
   7   4   2 36.8065 28.8898   8
   7   4   2 3.48123 15.5591   7
  -7  -4  -3 1177.55 144.628   9
  -7   4  -3 1382.12 151.858   9
   7   4   3 1182.26 147.610   7
  -7  -4  -4 30.9276 19.2597   9
  -7   4  -4 15.8462 20.3665  15
  -7   4  -4 28.6110 22.3529   9
  -7  -4  -5 17.3223 18.4774   9
  -7   4  -5 39.1861 24.5021  15
  -7   4  -5-5.08128 23.2259   9
  -7  -4  -6-4.79281 24.1337   9
  -7   4  -6 22.5500 22.9407  15
  -7   4  -7 678.147 81.8727  15
  -7  -5  12 807.831 84.4567   1
   7  -5 -12 631.839 87.9552  12
  -7  -5  12 751.306 90.7777   3
  -7   5  12 686.943 86.1735   3
  -7   5  11 503.472 67.4110   3
  -7  -5  11 652.020 68.2249   1
  -7  -5  11 380.783 67.0369   3
  -7  -5  11 657.515 75.9116   2
  -7  -5  11 761.802 88.3070   4
   7  -5 -11 490.262 70.1097  12
  -7  -5  10 663.303 85.7687   3
  -7   5  10 711.055 84.3507   3
   7  -5 -10 531.479 83.8498  12
  -7  -5  10 869.689 91.5905   2
  -7  -5  10 827.550 85.9407   1
  -7  -5  10 977.211 100.194   4
  -7  -5   9 103.913 31.5485   4
   7  -5  -9 27.8800 22.4865  12
  -7   5   9 68.7915 21.4272   3
  -7  -5   9 70.5133 23.5049   3
  -7   5   9 89.1662 20.1439   6
  -7  -5   9 97.5051 26.3707   2
  -7  -5   9 64.1800 23.0404   1
   7  -5  -8 3.87781 17.3753  12
  -7  -5   8 34.6218 19.5500   2
  -7  -5   8 17.6618 21.0460   1
  -7  -5   8 50.8164 20.6975   3
  -7   5   8 23.0209 16.7266   3
  -7  -5   8-4.03922 20.0298   6
  -7   5   8 14.2339 11.0549   6
   7  -5  -7 26.8106 18.9908  12
  -7  -5   7 19.6047 16.8042   2
  -7  -5   7 25.6692 17.8600   3
  -7  -5   7-3.97710 18.9754   6
  -7   5   7 30.5268 14.1711   6
  -7   5   7 9.44081 8.47598   8
  -7  -5   6 986.516 102.192   6
  -7  -5   6 939.917 97.3988   2
   7   5  -6 894.577 92.8286  10
   7  -5  -6 739.406 89.5765  10
  -7  -5   5 789.896 82.9563   2
   7   5  -5 676.224 87.4898  11
   7  -5  -5 662.033 75.4232  10
   7   5  -5 672.726 77.1963  10
  -7  -5   5 798.587 87.9506   6
   7   5  -4 3007.14 280.444  10
   7  -5  -4 2504.56 276.460  10
  -7  -5   4 2987.75 290.580   6
  -7  -5   4 3023.99 285.053   2
   7   5  -4 2966.16 291.548  11
  -7   5   3 369.859 46.4840  14
  -7  -5   3 309.516 42.6831   5
  -7  -5   3 354.696 51.8838   6
   7   5  -3 279.404 46.2832  11
   7  -5  -3 257.983 35.7533  10
   7   5  -3 299.283 39.3411  10
  -7  -5   3 247.523 31.1072   9
  -7  -5   3 310.196 44.1075   2
  -7   5   3 320.410 46.6937   5
  -7  -5   3 251.099 29.4988  15
   7   5  -2 1755.43 179.444  11
   7  -5  -2 1600.61 167.684  10
   7   5  -2 1583.58 170.975  10
  -7  -5   2 1561.95 163.190   9
   7   5  -2 1627.42 158.671  12
  -7   5   2 2239.28 180.335  14
   7   5  -2 1311.09 177.057   8
  -7   5   2 1647.35 164.674   7
  -7   5   2 2140.72 184.814   5
  -7  -5   2 1813.78 175.167   5
   7   5  -1 599.164 80.5966  11
   7  -5  -1 515.070 71.7742  10
   7   5  -1 584.923 76.9418  10
  -7  -5   1 562.073 68.4219   9
  -7   5   1 849.908 87.2553   5
  -7  -5   1 583.595 75.8823   5
   7   5  -1 689.378 64.5084  12
  -7   5   1 909.526 84.7599  14
  -7  -5   1 644.295 63.5586  14
   7   5  -1 563.211 85.1231   8
   7   5   0 491.411 52.4596  12
   7   5   0 438.436 62.1349   7
   7   5   0 457.737 75.4317   8
  -7  -5   0 488.241 58.2947   9
   7   5   1 21.7706 29.4855   8
  -7  -5  -1 37.2640 15.7678   9
   7   5   1 38.8321 19.8377   7
  -7   5  -1 35.9879 22.1812  14
  -7  -5  -2 280.703 42.9313   9
   7   5   2 327.639 49.4986   7
   7   5   2 326.209 62.9007   8
   7   5   2 321.874 52.0638  11
   7   5   3 52.5316 26.5110   7
  -7  -5  -3 80.8125 23.1066   9
   7   5   3 24.3635 28.6065   8
  -7   5  -3 105.828 29.7663  15
   7   5   3 80.2777 30.3930  11
  -7  -5  -4 1046.67 135.920   9
   7   5   4 1167.21 143.577   7
   7   5   4 1179.08 144.780  11
  -7  -5  -5 236.098 46.9362   9
   7   5   5 263.230 53.7266  11
  -7   5  -6 1588.83 136.196  15
   7   5   6 898.368 137.709  11
  -7  -5  -6 992.434 133.021   9
  -7   5  -6 1347.59 143.198   9
  -7  -6  12 118.202 32.5211   3
  -7   6  12 129.657 31.1178   3
  -7  -6  12 107.997 30.1774   1
  -7  -6  11 411.486 68.0865   4
  -7  -6  11 378.641 48.5239   1
  -7  -6  11 380.733 55.4462   2
   7  -6 -11 217.871 46.7632  12
  -7  -6  11 257.215 46.0637   3
  -7   6  11 290.056 45.2754   3
  -7  -6  10 572.094 74.7528   4
  -7  -6  10 422.979 55.4202   1
  -7   6  10 346.921 50.1597   3
  -7  -6  10 498.614 60.9302   2
  -7  -6  10 342.133 52.4436   3
   7  -6 -10 272.191 52.2024  12
  -7  -6   9 660.253 77.3783   2
  -7  -6   9 735.801 78.7243   1
  -7  -6   9 686.576 80.3291   6
  -7  -6   9 584.489 73.0603   3
  -7   6   9 494.432 68.4592   3
   7  -6  -9 459.242 73.3219  12
  -7  -6   9 848.041 90.6716   4
  -7  -6   8 542.610 68.5768   2
  -7  -6   8 540.627 72.6920   1
  -7  -6   8 518.378 67.5762   3
  -7   6   8 543.497 65.4430   3
  -7  -6   8 667.583 74.8605   6
   7  -6  -8 393.029 66.7419  12
  -7  -6   7 655.908 74.1790   6
  -7   6   7 580.619 60.5909   6
   7  -6  -7 395.465 66.7730  12
  -7  -6   7 679.790 70.6951   2
  -7  -6   7 559.046 67.2906   3
  -7   6   7 440.282 62.9715   3
  -7  -6   7 639.662 76.7121   4
  -7  -6   6 1650.76 183.646   6
  -7  -6   6 1865.19 181.144   2
   7   6  -6 1844.84 176.227  10
   7  -6  -6 1636.42 172.885  10
   7   6  -5 144.436 24.2275  10
   7  -6  -5 151.053 22.9395  10
   7   6  -5 106.913 32.7714  11
  -7  -6   5 155.604 33.8902   6
  -7  -6   5 170.700 29.9495   2
  -7   6   5 104.350 33.9307  14
  -7  -6   4 61.2014 25.9998   6
   7   6  -4 43.5871 14.5500  10
   7  -6  -4 30.2352 12.7604  10
   7   6  -4 31.1671 25.9502  11
  -7  -6   4 46.4236 18.5038   2
   7   6  -3 34.8402 24.3130  11
  -7  -6   3 31.5700 23.6523   6
  -7  -6   3 31.1593 8.85873   9
   7  -6  -3 24.1521 13.2956  10
   7   6  -3 40.8219 17.2287  10
  -7   6   3 21.5156 20.6672   5
  -7  -6   3 52.0463 19.2892   5
  -7  -6   3 6.98451 18.7171   2
   7   6  -2 108.452 23.6580  10
   7  -6  -2 140.273 21.8160  10
   7   6  -2 112.615 33.3483  11
   7   6  -2 94.7914 32.6653   8
  -7  -6   2 84.3157 17.5490   9
  -7   6   2 153.016 33.1669   5
  -7  -6   2 135.109 28.0768   5
  -7   6   2 124.072 23.0552   7
  -7  -6   1 552.443 68.9978   9
   7  -6  -1 568.246 71.3592  10
   7   6  -1 687.447 77.7323  10
  -7   6   1 995.728 88.1933  14
   7   6  -1 476.194 84.4573   8
  -7   6   1 901.689 87.4509   5
  -7  -6   1 671.788 76.2763   5
  -7  -6   0 1197.27 140.473   9
   7   6   0 1153.72 147.762   7
   7   6   0 1528.76 168.165   8
   7  -6   0 1310.39 143.544  10
   7   6   0 1548.22 150.718  10
  -7  -6  -1 959.787 116.206   9
   7   6   1 935.639 123.640   7
   7   6   1 1182.21 142.588   8
   7   6   1 1176.26 128.962  11
   7   6   2 982.024 120.918   8
   7   6   2 756.262 102.057   7
  -7  -6  -2 780.305 94.3125   9
   7   6   2 985.999 106.103  11
   7   6   3 50.6178 42.6110   8
  -7  -6  -3 61.4195 22.6588   9
   7   6   3 143.433 35.2159  11
   7   6   3 108.175 32.4970   7
  -7   6  -3 129.817 33.9833  15
  -7   6  -4 142.802 34.5971  15
   7   6   4 69.6765 42.6781   8
  -7  -6  -4 121.466 30.1016   9
   7   6   4 89.0822 33.1515  11
   7   6   4 69.8460 31.5296   7
  -7  -6  -4 136.541 29.5206   4
   7   6   5 81.2026 33.4721  11
  -7   6  -5 124.346 36.5474  15
  -7  -6  -5 131.212 32.2315   9
   7   6   6 59.8650 30.2673  11
  -7  -6  -6 54.2129 25.4361   9
  -7   6  -6 67.5002 33.8306  15
  -7   7  12 24.7331 20.3007   3
  -7  -7  11 501.670 68.9532   3
  -7   7  11 490.202 65.8999   3
  -7  -7  11 746.221 93.9683   4
  -7  -7  11 626.287 74.9943   1
  -7  -7  10 19.6552 21.5437   3
  -7   7  10 24.5362 19.9446   3
   7  -7 -10 18.1414 21.3176  12
  -7  -7  10 75.3489 31.1638   6
  -7  -7  10 20.1383 34.5031   4
  -7  -7  10 16.1728 27.6090   1
  -7  -7  10 52.2243 26.3317   2
  -7  -7   9 133.037 27.9521   3
  -7   7   9 113.147 24.8944   3
   7  -7  -9 102.830 32.4093  12
  -7  -7   9 138.622 35.6074   6
  -7  -7   9 103.364 41.4036   4
  -7  -7   9 107.973 29.9132   2
  -7  -7   9 142.428 37.0858   1
  -7  -7   8 17.2714 17.8184   3
  -7   7   8 33.4013 18.3679   3
   7  -7  -8 4.34766 20.7419  12
  -7  -7   8 13.1157 23.5821   6
  -7  -7   8 11.0970 21.4647   2
  -7  -7   8 4.64180 29.0023   1
  -7  -7   8 29.6438 30.4170   4
  -7  -7   7 12.9192 20.9132   6
  -7  -7   7 19.4538 16.7496   3
  -7   7   7 22.9746 16.2384   3
  -7  -7   7-3.47405 16.2202   2
  -7  -7   7-10.6699 24.3609   4
  -7   7   6 140.685 33.0440  14
  -7  -7   6 149.569 33.5877   6
  -7  -7   6 105.816 25.3819   3
  -7   7   6 84.4516 22.3243   3
  -7  -7   6 129.213 27.7115   2
  -7  -7   6 99.4192 37.8395   4
   7   7  -5 1348.04 134.611  10
   7  -7  -5 1201.22 132.044  10
  -7   7   5 1529.91 146.396  14
  -7  -7   5 1247.34 145.835   6
  -7  -7   5 1439.07 142.009   2
   7   7  -5 1118.64 147.383  11
  -7  -7   5 1566.26 150.980   4
   7   7  -4 389.303 44.0175  10
   7  -7  -4 317.021 41.3706  10
  -7   7   4 362.241 53.2500   5
  -7  -7   4 344.811 47.5331   5
  -7  -7   4 446.616 60.0849   6
  -7   7   4 365.403 53.0201  14
   7   7  -4 312.778 56.7980  11
  -7  -7   4 381.094 51.0200   2
  -7  -7   4 375.177 56.1316   4
   7   7  -3 1358.96 130.518  10
   7  -7  -3 1046.43 126.593  10
  -7  -7   3 1393.36 148.573   6
[truncated: 106,780 more chars]
