# Supplementary material for: The Solvent Effect on Composition and Dimensionality of Mercury(II) Complexes with Picolinic Acid
Source: Molecules. 2021 Aug 18;26(16):5002. doi: 10.3390/molecules26165002 (PMC8400068; doi:10.3390/molecules26165002)
Supplement: Supplementary file 1 [file molecules-26-05002-s001.zip › 2.cif]

 
data_2
 
_audit_creation_method            'SHELXL-2018/3'
_shelx_SHELXL_version_number      '2018/3'
_chemical_name_systematic         ?
_chemical_name_common             ?
_chemical_melting_point           ?
_chemical_formula_moiety          ?
_chemical_formula_sum
 'C12 H9 Cl Hg N2 O4' 
_chemical_formula_weight          481.25

loop_
 _atom_type_symbol
 _atom_type_description
 _atom_type_scat_dispersion_real
 _atom_type_scat_dispersion_imag
 _atom_type_scat_source
 'C'  'C'   0.0033   0.0016
 'International Tables Vol C Tables 4.2.6.8 and 6.1.1.4'
 'H'  'H'   0.0000   0.0000
 'International Tables Vol C Tables 4.2.6.8 and 6.1.1.4'
 'Hg'  'Hg'  -2.3894   9.2266
 'International Tables Vol C Tables 4.2.6.8 and 6.1.1.4'
 'Cl'  'Cl'   0.1484   0.1585
 'International Tables Vol C Tables 4.2.6.8 and 6.1.1.4'
 'N'  'N'   0.0061   0.0033
 'International Tables Vol C Tables 4.2.6.8 and 6.1.1.4'
 'O'  'O'   0.0106   0.0060
 'International Tables Vol C Tables 4.2.6.8 and 6.1.1.4'
 
_space_group_crystal_system       monoclinic
_space_group_IT_number            14
_space_group_name_H-M_alt         'P 21/c'
_space_group_name_Hall            '-P 2ybc'
 
_shelx_space_group_comment
;
The symmetry employed for this shelxl refinement is uniquely defined
by the following loop, which should always be used as a source of
symmetry information in preference to the above space-group names.
They are only intended as comments.
;
 
loop_
 _space_group_symop_operation_xyz
 'x, y, z'
 '-x, y+1/2, -z+1/2'
 '-x, -y, -z'
 'x, -y-1/2, z-1/2'
 
_cell_length_a                    9.1384(5)
_cell_length_b                    11.7625(8)
_cell_length_c                    12.7526(7)
_cell_angle_alpha                 90
_cell_angle_beta                  92.798(5)
_cell_angle_gamma                 90
_cell_volume                      1369.15(14)
_cell_formula_units_Z             4
_cell_measurement_temperature     170(2)
_cell_measurement_reflns_used     7920
_cell_measurement_theta_min       2.8210
_cell_measurement_theta_max       33.2750
 
_exptl_crystal_description        'prism'
_exptl_crystal_colour             'colorless'
_exptl_crystal_density_meas       ?
_exptl_crystal_density_method     ?
_exptl_crystal_density_diffrn     2.335          
_exptl_crystal_F_000              896
_exptl_transmission_factor_min    ?
_exptl_transmission_factor_max    ?
_exptl_crystal_size_max           ?
_exptl_crystal_size_mid           ?
_exptl_crystal_size_min           ?
_exptl_absorpt_coefficient_mu     11.450
_shelx_estimated_absorpt_T_min    ?
_shelx_estimated_absorpt_T_max    ?
_exptl_absorpt_correction_type    multi-scan
_exptl_absorpt_correction_T_min   0.35906
_exptl_absorpt_correction_T_max   1.00000
_exptl_absorpt_process_details    
;
CrysAlisPro 1.171.41.92a (Rigaku Oxford Diffraction, 2020)
Empirical absorption correction using spherical harmonics,
implemented in SCALE3 ABSPACK scaling algorithm.
;
_exptl_absorpt_special_details    ?
_diffrn_ambient_temperature       170(2)
_diffrn_radiation_wavelength      0.71073
_diffrn_radiation_type            MoK\a
_diffrn_source                    ?
_diffrn_measurement_device_type   'XtaLAB Synergy, Dualflex, HyPix'
_diffrn_measurement_method        '\w scans'
_diffrn_detector_area_resol_mean  ?
_diffrn_reflns_number             9336
_diffrn_reflns_av_unetI/netI      0.0535
_diffrn_reflns_av_R_equivalents   0.0605
_diffrn_reflns_limit_h_min        -10
_diffrn_reflns_limit_h_max        10
_diffrn_reflns_limit_k_min        -13
_diffrn_reflns_limit_k_max        13
_diffrn_reflns_limit_l_min        -15
_diffrn_reflns_limit_l_max        14
_diffrn_reflns_theta_min          2.825
_diffrn_reflns_theta_max          24.997
_diffrn_reflns_theta_full         24.997
_diffrn_measured_fraction_theta_max   0.999
_diffrn_measured_fraction_theta_full  0.999
_diffrn_reflns_Laue_measured_fraction_max    0.999
_diffrn_reflns_Laue_measured_fraction_full   0.999
_diffrn_reflns_point_group_measured_fraction_max   0.999
_diffrn_reflns_point_group_measured_fraction_full  0.999
_reflns_number_total              2401
_reflns_number_gt                 2070
_reflns_threshold_expression      'I > 2\s(I)'
_reflns_Friedel_coverage          0.000
_reflns_Friedel_fraction_max      .
_reflns_Friedel_fraction_full     .
 
_reflns_special_details
;
 Reflections were merged by SHELXL according to the crystal
 class for the calculation of statistics and refinement.
 
 _reflns_Friedel_fraction is defined as the number of unique
 Friedel pairs measured divided by the number that would be
 possible theoretically, ignoring centric projections and
 systematic absences.
;
 
_computing_data_collection        'CrysAlisPro 1.171.41.92a (Rigaku OD, 2020)'
_computing_cell_refinement        'CrysAlisPro 1.171.41.92a (Rigaku OD, 2020)'
_computing_data_reduction         'CrysAlisPro 1.171.41.92a (Rigaku OD, 2020)'
_computing_structure_solution     'SHELXT (Sheldrick, 2015)'
_computing_structure_refinement 'SHELXL-2018/3 (Sheldrick, 2018)'
_computing_molecular_graphics     'MERCURY, Version 2020.2.0 (Macrae et al., 2020)'
_computing_publication_material   'SHELXL-2018/3 (Sheldrick, 2018)'
_refine_special_details           ?
_refine_ls_structure_factor_coef  Fsqd
_refine_ls_matrix_type            full
_refine_ls_weighting_scheme       calc
_refine_ls_weighting_details
'w=1/[\s^2^(Fo^2^)+(0.0334P)^2^+0.6733P] where P=(Fo^2^+2Fc^2^)/3'
_atom_sites_solution_primary      ?
_atom_sites_solution_secondary    ?
_atom_sites_solution_hydrogens    mixed
_refine_ls_hydrogen_treatment     mixed
_refine_ls_extinction_method      none
_refine_ls_extinction_coef        .
_refine_ls_number_reflns          2401
_refine_ls_number_parameters      184
_refine_ls_number_restraints      1
_refine_ls_R_factor_all           0.0382
_refine_ls_R_factor_gt            0.0325
_refine_ls_wR_factor_ref          0.0804
_refine_ls_wR_factor_gt           0.0785
_refine_ls_goodness_of_fit_ref    1.117
_refine_ls_restrained_S_all       1.117
_refine_ls_shift/su_max           0.001
_refine_ls_shift/su_mean          0.000
 
loop_
 _atom_site_label
 _atom_site_type_symbol
 _atom_site_fract_x
 _atom_site_fract_y
 _atom_site_fract_z
 _atom_site_U_iso_or_equiv
 _atom_site_adp_type
 _atom_site_occupancy
 _atom_site_site_symmetry_order  
 _atom_site_calc_flag
 _atom_site_refinement_flags_posn
 _atom_site_refinement_flags_adp
 _atom_site_refinement_flags_occupancy
 _atom_site_disorder_assembly
 _atom_site_disorder_group
Hg1 Hg 0.73475(2) 0.27764(2) 0.54257(2) 0.02514(12) Uani 1 1 d . . . . .
Cl1 Cl 0.7505(2) 0.22770(16) 0.72135(14) 0.0405(5) Uani 1 1 d . . . . .
N1 N 0.6862(5) 0.4257(4) 0.4397(4) 0.0187(11) Uani 1 1 d . . . . .
N2 N 0.7992(5) 0.1106(5) 0.4556(4) 0.0236(12) Uani 1 1 d . . . . .
O1 O 0.4816(5) 0.2563(4) 0.4643(4) 0.0285(11) Uani 1 1 d . . . . .
O2 O 0.3169(4) 0.3579(4) 0.3676(3) 0.0289(11) Uani 1 1 d . . . . .
O3 O 0.9894(5) 0.2917(4) 0.4725(4) 0.0273(11) Uani 1 1 d . . . . .
O4 O 1.1386(5) 0.2022(4) 0.3653(4) 0.0292(11) Uani 1 1 d D . . . .
H41 H 1.203(6) 0.253(5) 0.366(6) 0.035 Uiso 1 1 d D U . . .
C1 C 0.5520(6) 0.4349(5) 0.3902(5) 0.0194(13) Uani 1 1 d . . . . .
C2 C 0.5179(7) 0.5226(6) 0.3231(5) 0.0267(15) Uani 1 1 d . . . . .
H2 H 0.422660 0.527940 0.290130 0.032 Uiso 1 1 calc R U . . .
C3 C 0.6238(7) 0.6041(6) 0.3033(5) 0.0288(15) Uani 1 1 d . . . . .
H3 H 0.602890 0.664549 0.255487 0.035 Uiso 1 1 calc R U . . .
C4 C 0.7600(7) 0.5949(6) 0.3548(5) 0.0273(15) Uani 1 1 d . . . . .
H4 H 0.834102 0.649512 0.343199 0.033 Uiso 1 1 calc R U . . .
C5 C 0.7872(6) 0.5064(6) 0.4228(5) 0.0224(14) Uani 1 1 d . . . . .
H5 H 0.880219 0.501665 0.459169 0.027 Uiso 1 1 calc R U . . .
C6 C 0.4443(6) 0.3396(6) 0.4112(5) 0.0199(13) Uani 1 1 d . . . . .
C7 C 0.9255(6) 0.1056(6) 0.4054(4) 0.0194(13) Uani 1 1 d . . . . .
C8 C 0.9693(7) 0.0100(6) 0.3519(5) 0.0267(15) Uani 1 1 d . . . . .
H8 H 1.060344 0.008600 0.318983 0.032 Uiso 1 1 calc R U . . .
C9 C 0.8765(7) -0.0842(6) 0.3476(5) 0.0319(16) Uani 1 1 d . . . . .
H9 H 0.902223 -0.150248 0.309781 0.038 Uiso 1 1 calc R U . . .
C10 C 0.7464(7) -0.0807(6) 0.3990(6) 0.0371(18) Uani 1 1 d . . . . .
H10 H 0.682604 -0.144513 0.398346 0.045 Uiso 1 1 calc R U . . .
C11 C 0.7121(7) 0.0175(6) 0.4508(5) 0.0311(16) Uani 1 1 d . . . . .
H11 H 0.622232 0.020175 0.485209 0.037 Uiso 1 1 calc R U . . .
C12 C 1.0217(7) 0.2109(5) 0.4166(5) 0.0216(15) Uani 1 1 d . . . . .
 
loop_
 _atom_site_aniso_label
 _atom_site_aniso_U_11
 _atom_site_aniso_U_22
 _atom_site_aniso_U_33
 _atom_site_aniso_U_23
 _atom_site_aniso_U_13
 _atom_site_aniso_U_12
Hg1 0.01991(17) 0.0320(2) 0.02359(18) 0.00531(11) 0.00161(11) -0.00205(10)
Cl1 0.0545(13) 0.0448(12) 0.0223(9) 0.0063(8) 0.0018(8) 0.0008(9)
N1 0.015(3) 0.025(3) 0.015(3) -0.001(2) 0.000(2) -0.003(2)
N2 0.019(3) 0.026(3) 0.027(3) 0.002(2) 0.006(2) -0.002(2)
O1 0.018(2) 0.028(3) 0.039(3) 0.010(2) 0.001(2) -0.0058(18)
O2 0.017(2) 0.034(3) 0.035(3) 0.004(2) -0.0030(19) -0.0044(18)
O3 0.020(2) 0.026(3) 0.036(3) -0.004(2) 0.005(2) -0.0057(18)
O4 0.019(2) 0.030(3) 0.039(3) -0.004(2) 0.008(2) -0.0099(18)
C1 0.017(3) 0.020(4) 0.022(3) -0.004(3) 0.007(2) -0.001(2)
C2 0.024(3) 0.027(4) 0.029(4) -0.001(3) -0.001(3) -0.002(3)
C3 0.037(4) 0.020(4) 0.030(4) 0.006(3) 0.003(3) 0.003(3)
C4 0.026(4) 0.024(4) 0.033(4) -0.002(3) 0.010(3) -0.009(3)
C5 0.016(3) 0.022(4) 0.029(3) 0.002(3) 0.002(2) -0.004(2)
C6 0.018(3) 0.024(4) 0.018(3) -0.005(3) 0.004(2) -0.001(2)
C7 0.018(3) 0.025(4) 0.015(3) 0.001(3) -0.005(2) -0.002(2)
C8 0.026(3) 0.028(4) 0.026(4) 0.005(3) 0.002(3) 0.004(3)
C9 0.043(4) 0.026(4) 0.027(4) 0.003(3) -0.001(3) -0.002(3)
C10 0.035(4) 0.031(5) 0.046(5) 0.003(4) 0.000(3) -0.012(3)
C11 0.023(3) 0.029(4) 0.042(4) 0.000(3) 0.004(3) -0.012(3)
C12 0.018(3) 0.028(4) 0.018(3) 0.005(3) 0.001(3) 0.001(3)
 
_geom_special_details
;
 All esds (except the esd in the dihedral angle between two l.s. planes)
 are estimated using the full covariance matrix.  The cell esds are taken
 into account individually in the estimation of esds in distances, angles
 and torsion angles; correlations between esds in cell parameters are only
 used when they are defined by crystal symmetry.  An approximate (isotropic)
 treatment of cell esds is used for estimating esds involving l.s. planes.
;
 
loop_
 _geom_bond_atom_site_label_1
 _geom_bond_atom_site_label_2
 _geom_bond_distance
 _geom_bond_site_symmetry_2
 _geom_bond_publ_flag
Hg1 N1 2.212(5) . ?
Hg1 N2 2.346(6) . ?
Hg1 Cl1 2.3519(18) . ?
Hg1 O1 2.487(4) . ?
Hg1 O3 2.539(4) . ?
N1 C5 1.348(8) . ?
N1 C1 1.356(7) . ?
N2 C7 1.348(7) . ?
N2 C11 1.353(9) . ?
O1 C6 1.229(8) . ?
O2 C6 1.283(6) . ?
O3 C12 1.233(8) . ?
O4 C12 1.283(8) . ?
O4 H41 0.840(10) . ?
C1 C2 1.366(9) . ?
C1 C6 1.524(8) . ?
C2 C3 1.394(9) . ?
C2 H2 0.9500 . ?
C3 C4 1.384(9) . ?
C3 H3 0.9500 . ?
C4 C5 1.369(9) . ?
C4 H4 0.9500 . ?
C5 H5 0.9500 . ?
C7 C8 1.385(9) . ?
C7 C12 1.521(9) . ?
C8 C9 1.396(10) . ?
C8 H8 0.9500 . ?
C9 C10 1.385(10) . ?
C9 H9 0.9500 . ?
C10 C11 1.375(10) . ?
C10 H10 0.9500 . ?
C11 H11 0.9500 . ?
 
loop_
 _geom_angle_atom_site_label_1
 _geom_angle_atom_site_label_2
 _geom_angle_atom_site_label_3
 _geom_angle
 _geom_angle_site_symmetry_1
 _geom_angle_site_symmetry_3
 _geom_angle_publ_flag
N1 Hg1 N2 115.28(18) . . ?
N1 Hg1 Cl1 140.56(13) . . ?
N2 Hg1 Cl1 104.14(13) . . ?
N1 Hg1 O1 71.68(16) . . ?
N2 Hg1 O1 88.61(16) . . ?
Cl1 Hg1 O1 112.06(12) . . ?
N1 Hg1 O3 84.30(16) . . ?
N2 Hg1 O3 68.44(15) . . ?
Cl1 Hg1 O3 110.12(12) . . ?
O1 Hg1 O3 135.72(15) . . ?
C5 N1 C1 118.7(5) . . ?
C5 N1 Hg1 122.0(4) . . ?
C1 N1 Hg1 119.3(4) . . ?
C7 N2 C11 117.3(6) . . ?
C7 N2 Hg1 120.1(4) . . ?
C11 N2 Hg1 122.6(4) . . ?
C6 O1 Hg1 111.6(4) . . ?
C12 O3 Hg1 113.8(4) . . ?
C12 O4 H41 122(6) . . ?
N1 C1 C2 121.7(5) . . ?
N1 C1 C6 115.9(5) . . ?
C2 C1 C6 122.4(5) . . ?
C1 C2 C3 119.6(6) . . ?
C1 C2 H2 120.2 . . ?
C3 C2 H2 120.2 . . ?
C4 C3 C2 118.5(6) . . ?
C4 C3 H3 120.8 . . ?
C2 C3 H3 120.8 . . ?
C5 C4 C3 119.4(6) . . ?
C5 C4 H4 120.3 . . ?
C3 C4 H4 120.3 . . ?
N1 C5 C4 122.1(5) . . ?
N1 C5 H5 118.9 . . ?
C4 C5 H5 118.9 . . ?
O1 C6 O2 126.4(6) . . ?
O1 C6 C1 121.3(5) . . ?
O2 C6 C1 112.4(5) . . ?
N2 C7 C8 122.9(6) . . ?
N2 C7 C12 115.2(5) . . ?
C8 C7 C12 121.8(5) . . ?
C7 C8 C9 118.3(6) . . ?
C7 C8 H8 120.8 . . ?
C9 C8 H8 120.8 . . ?
C10 C9 C8 119.5(7) . . ?
C10 C9 H9 120.3 . . ?
C8 C9 H9 120.3 . . ?
C11 C10 C9 118.3(6) . . ?
C11 C10 H10 120.9 . . ?
C9 C10 H10 120.9 . . ?
N2 C11 C10 123.6(6) . . ?
N2 C11 H11 118.2 . . ?
C10 C11 H11 118.2 . . ?
O3 C12 O4 125.8(6) . . ?
O3 C12 C7 121.9(6) . . ?
O4 C12 C7 112.3(5) . . ?
 
loop_
 _geom_torsion_atom_site_label_1
 _geom_torsion_atom_site_label_2
 _geom_torsion_atom_site_label_3
 _geom_torsion_atom_site_label_4
 _geom_torsion
 _geom_torsion_site_symmetry_1
 _geom_torsion_site_symmetry_2
 _geom_torsion_site_symmetry_3
 _geom_torsion_site_symmetry_4
 _geom_torsion_publ_flag
C5 N1 C1 C2 0.8(9) . . . . ?
Hg1 N1 C1 C2 -177.8(5) . . . . ?
C5 N1 C1 C6 178.8(5) . . . . ?
Hg1 N1 C1 C6 0.2(7) . . . . ?
N1 C1 C2 C3 1.0(9) . . . . ?
C6 C1 C2 C3 -176.8(6) . . . . ?
C1 C2 C3 C4 -1.6(10) . . . . ?
C2 C3 C4 C5 0.4(10) . . . . ?
C1 N1 C5 C4 -2.1(10) . . . . ?
Hg1 N1 C5 C4 176.4(5) . . . . ?
C3 C4 C5 N1 1.5(10) . . . . ?
Hg1 O1 C6 O2 -174.3(5) . . . . ?
Hg1 O1 C6 C1 5.9(7) . . . . ?
N1 C1 C6 O1 -4.6(8) . . . . ?
C2 C1 C6 O1 173.3(6) . . . . ?
N1 C1 C6 O2 175.5(5) . . . . ?
C2 C1 C6 O2 -6.5(8) . . . . ?
C11 N2 C7 C8 -1.1(9) . . . . ?
Hg1 N2 C7 C8 -179.5(4) . . . . ?
C11 N2 C7 C12 -177.9(5) . . . . ?
Hg1 N2 C7 C12 3.8(6) . . . . ?
N2 C7 C8 C9 1.7(9) . . . . ?
C12 C7 C8 C9 178.3(5) . . . . ?
C7 C8 C9 C10 -1.8(9) . . . . ?
C8 C9 C10 C11 1.4(10) . . . . ?
C7 N2 C11 C10 0.6(10) . . . . ?
Hg1 N2 C11 C10 179.0(5) . . . . ?
C9 C10 C11 N2 -0.8(11) . . . . ?
Hg1 O3 C12 O4 174.2(5) . . . . ?
Hg1 O3 C12 C7 -8.6(7) . . . . ?
N2 C7 C12 O3 3.9(8) . . . . ?
C8 C7 C12 O3 -172.9(6) . . . . ?
N2 C7 C12 O4 -178.5(5) . . . . ?
C8 C7 C12 O4 4.7(8) . . . . ?
 
loop_
 _geom_hbond_atom_site_label_D 
 _geom_hbond_atom_site_label_H 
 _geom_hbond_atom_site_label_A 
 _geom_hbond_distance_DH 
 _geom_hbond_distance_HA 
 _geom_hbond_distance_DA 
 _geom_hbond_angle_DHA 
 _geom_hbond_site_symmetry_A 
 _geom_hbond_publ_flag
O4 H41 O2  0.840(10) 1.612(13) 2.451(6) 175(8) 1_655 yes
 
_refine_diff_density_max    1.706
_refine_diff_density_min   -1.083
_refine_diff_density_rms    0.187

_shelx_res_file
;
TITL shelxt_a.res in P2(1)/c
    shelx.res
    created by SHELXL-2018/3 at 22:12:15 on 20-Jun-2021
CELL  0.71073   9.1384  11.7625  12.7526   90.000   92.798   90.000
ZERR     4.00   0.0005   0.0008   0.0007    0.000    0.005    0.000
LATT   1
SYMM  - X, 1/2 + Y, 1/2 - Z
SFAC  C    H    HG   CL   N    O
UNIT  48 36 4 4 8 16
OMIT -1 50
ACTA
MERG   2
FMAP   2
PLAN   50
BOND $H
HTAB
EQIV $1 x+1, y, z
HTAB O4 O2_$1
TEMP -103
CONF
LIST   6
L.S.  10
MPLA 4 N1 N2 O1 O3 Hg1
DFIX 0.84 0.01 O4 H41
WGHT    0.033400    0.673300
FVAR       0.25992
HG1   3    0.734748    0.277639    0.542574    11.00000    0.01991    0.03198 =
         0.02359    0.00531    0.00161   -0.00205
CL1   4    0.750454    0.227703    0.721348    11.00000    0.05448    0.04478 =
         0.02228    0.00630    0.00179    0.00079
N1    5    0.686221    0.425746    0.439729    11.00000    0.01531    0.02519 =
         0.01549   -0.00089   -0.00038   -0.00331
N2    5    0.799165    0.110576    0.455586    11.00000    0.01897    0.02559 =
         0.02667    0.00181    0.00559   -0.00210
O1    6    0.481579    0.256338    0.464275    11.00000    0.01804    0.02820 =
         0.03919    0.01034    0.00141   -0.00575
O2    6    0.316917    0.357856    0.367596    11.00000    0.01719    0.03392 =
         0.03518    0.00429   -0.00298   -0.00442
O3    6    0.989389    0.291693    0.472493    11.00000    0.02018    0.02629 =
         0.03575   -0.00379    0.00512   -0.00569
O4    6    1.138609    0.202167    0.365346    11.00000    0.01924    0.02976 =
         0.03934   -0.00352    0.00793   -0.00994
H41   2    1.203292    0.252965    0.366460    11.00000   -1.20000

C1    1    0.551986    0.434899    0.390178    11.00000    0.01709    0.02006 =
         0.02169   -0.00364    0.00689   -0.00052
C2    1    0.517908    0.522565    0.323083    11.00000    0.02405    0.02654 =
         0.02921   -0.00083   -0.00059   -0.00231
AFIX  43
H2    2    0.422660    0.527940    0.290130    11.00000   -1.20000
AFIX   0
C3    1    0.623801    0.604083    0.303281    11.00000    0.03694    0.01983 =
         0.02969    0.00581    0.00289    0.00259
AFIX  43
H3    2    0.602890    0.664549    0.255487    11.00000   -1.20000
AFIX   0
C4    1    0.760042    0.594900    0.354835    11.00000    0.02645    0.02380 =
         0.03254   -0.00234    0.01019   -0.00869
AFIX  43
H4    2    0.834102    0.649512    0.343199    11.00000   -1.20000
AFIX   0
C5    1    0.787196    0.506391    0.422786    11.00000    0.01582    0.02233 =
         0.02916    0.00199    0.00224   -0.00362
AFIX  43
H5    2    0.880219    0.501665    0.459169    11.00000   -1.20000
AFIX   0
C6    1    0.444308    0.339571    0.411158    11.00000    0.01777    0.02405 =
         0.01820   -0.00485    0.00377   -0.00073
C7    1    0.925497    0.105626    0.405449    11.00000    0.01822    0.02498 =
         0.01454    0.00092   -0.00502   -0.00213
C8    1    0.969341    0.010007    0.351929    11.00000    0.02583    0.02821 =
         0.02609    0.00498    0.00151    0.00358
AFIX  43
H8    2    1.060344    0.008600    0.318983    11.00000   -1.20000
AFIX   0
C9    1    0.876460   -0.084224    0.347621    11.00000    0.04277    0.02553 =
         0.02701    0.00253   -0.00122   -0.00220
AFIX  43
H9    2    0.902223   -0.150248    0.309781    11.00000   -1.20000
AFIX   0
C10   1    0.746408   -0.080727    0.398952    11.00000    0.03485    0.03083 =
         0.04552    0.00307   -0.00014   -0.01196
AFIX  43
H10   2    0.682604   -0.144513    0.398346    11.00000   -1.20000
AFIX   0
C11   1    0.712074    0.017512    0.450821    11.00000    0.02313    0.02864 =
         0.04189    0.00012    0.00418   -0.01232
AFIX  43
H11   2    0.622232    0.020175    0.485209    11.00000   -1.20000
AFIX   0
C12   1    1.021739    0.210851    0.416624    11.00000    0.01827    0.02811 =
         0.01839    0.00458    0.00091    0.00071
HKLF    4


REM  shelxt_a.res in P2(1)/c
REM wR2 = 0.0804, GooF = S = 1.117, Restrained GooF = 1.117 for all data
REM R1 = 0.0325 for 2070 Fo > 4sig(Fo) and 0.0382 for all 2401 data
REM 184 parameters refined using 1 restraints

END

WGHT      0.0330      0.7774

REM Instructions for potential hydrogen bonds
HTAB O4 O2_$1

REM Highest difference peak  1.706,  deepest hole -1.083,  1-sigma level  0.187
Q1    1   0.8560  0.2771  0.5355  11.00000  0.05    1.71
Q2    1   0.6202  0.2740  0.5502  11.00000  0.05    1.61
Q3    1   1.0205  0.2811  0.5449  11.00000  0.05    1.04
Q4    1   0.4537  0.2811  0.5363  11.00000  0.05    0.95
Q5    1   0.6822 -0.2923  0.4562  11.00000  0.05    0.89
Q6    1   1.1575  0.2764  0.5370  11.00000  0.05    0.85
Q7    1   0.6674  0.1600  0.5575  11.00000  0.05    0.73
Q8    1   0.7861  0.3793  0.4150  11.00000  0.05    0.69
Q9    1   0.7449  0.3999  0.5288  11.00000  0.05    0.66
Q10   1   0.8809  0.3908  0.5564  11.00000  0.05    0.64
Q11   1   0.5610  0.2523  0.4761  11.00000  0.05    0.60
Q12   1   0.8005  0.1627  0.5275  11.00000  0.05    0.60
Q13   1   0.1431  0.3976  0.4238  11.00000  0.05    0.59
Q14   1   0.5787  0.1637  0.6179  11.00000  0.05    0.55
Q15   1   0.5949  0.3888  0.5293  11.00000  0.05    0.55
Q16   1   1.2154 -0.0730  0.2974  11.00000  0.05    0.54
Q17   1   0.9752 -0.0361  0.2370  11.00000  0.05    0.54
Q18   1   0.7746  0.1726  0.4209  11.00000  0.05    0.54
Q19   1   0.8654 -0.0127  0.1979  11.00000  0.05    0.53
Q20   1   1.1210 -0.0786  0.2441  11.00000  0.05    0.53
Q21   1   0.9917 -0.0758  0.3962  11.00000  0.05    0.51
Q22   1   0.6937  0.1600  0.3409  11.00000  0.05    0.51
Q23   1   1.0559 -0.0485  0.4564  11.00000  0.05    0.51
Q24   1   0.7561 -0.2177  0.4939  11.00000  0.05    0.51
Q25   1   1.1377  0.0460  0.3429  11.00000  0.05    0.51
Q26   1   0.5736  0.5527  0.1637  11.00000  0.05    0.50
Q27   1   0.9361  0.0758  0.3138  11.00000  0.05    0.49
Q28   1   0.5349  0.1824  0.5601  11.00000  0.05    0.49
Q29   1   1.0839  0.1648  0.5347  11.00000  0.05    0.48
Q30   1   0.5725  0.5322  0.2777  11.00000  0.05    0.48
Q31   1   0.4339  0.2986  0.2875  11.00000  0.05    0.48
Q32   1   0.7000  0.3259  0.4067  11.00000  0.05    0.48
Q33   1   0.3289  0.5947  0.3357  11.00000  0.05    0.48
Q34   1   0.6389  0.2343  0.7217  11.00000  0.05    0.48
Q35   1   1.2269  0.2702  0.3056  11.00000  0.05    0.47
Q36   1   1.2769  0.1881  0.3872  11.00000  0.05    0.47
Q37   1   0.5018  0.3698  0.3621  11.00000  0.05    0.45
Q38   1   0.3170  0.5452  0.3384  11.00000  0.05    0.45
Q39   1   0.6246  0.0196  0.6095  11.00000  0.05    0.45
Q40   1   0.7023  0.4773  0.4970  11.00000  0.05    0.45
Q41   1   0.8035  0.0653  0.5223  11.00000  0.05    0.45
Q42   1   1.0246  0.0896  0.2571  11.00000  0.05    0.45
Q43   1   0.8406  0.2885  0.4420  11.00000  0.05    0.44
Q44   1   0.9936  0.2853  0.4474  11.00000  0.05    0.44
Q45   1   0.8768  0.3706  0.3776  11.00000  0.05    0.44
Q46   1   0.8122  0.7238  0.3016  11.00000  0.05    0.43
Q47   1   0.8550  0.2048  0.7020  11.00000  0.05    0.43
Q48   1   1.0908  0.2239  0.2984  11.00000  0.05    0.43
Q49   1   0.5941 -0.0402  0.4146  11.00000  0.05    0.43
Q50   1   0.8625  0.5895  0.3213  11.00000  0.05    0.42
;
_shelx_res_checksum   51116

_shelx_hkl_file
;
   0   0   2 5577.25 360.415   7
   0   0   3 2.96513 1.63136   7
   0   0   4 324.610 24.9603   7
   0   0   4 389.869 25.0484   8
   0   0   5 3.32794 2.28211   7
   0   0  -5 0.56487 1.17502   2
   0   0   5 0.37188 2.12912   8
   0   0  -6 77.7931 6.30614   2
   0   0   6 73.2215 7.80755   7
   0   0   6 85.1423 8.11367   8
   0   0   7 3.11474 3.24196   7
   0   0   7 2.49942 2.62131   8
   0   0  -7-0.64391 3.42908   3
   0   0  -8 915.560 62.0387   3
   0   0   8 882.426 60.8356   7
   0   0   8 860.439 60.2311   8
   0   0   9-1.26308 3.80517   7
   0   0  -9-0.78827 4.06266   3
   0   0 -10 1596.93 107.174   3
   0   0  10 1545.51 105.909   7
   0   0  11-0.75195 4.85195   7
   0   0 -11 5.53176 5.34876   3
   0   0 -12 1453.76 101.120   3
   0   0  12 1466.94 99.9176   7
   0   0 -13-1.07349 5.88953   3
   0   0 -14 351.900 30.2715   3
   0   0 -15 5.00724 8.08066   3
   0   0 -16 215.792 23.8946   3
   0   0 -17 5.44389 9.49654   3
   0   0 -17-10.1911 11.3452   1
   0   0 -18 3.83785 9.32655   3
   0   0 -18 4.27202 12.7126   1
   0   1   2 417.784 27.6672   3
   0   1  -2 394.101 30.1958   8
   0  -1  -3 16.0708 2.08308   7
   0   1  -3 12.9448 4.55218   8
   0   1   3 14.8075 2.26744   2
   0   1   3 20.7202 2.81734   3
   0   1  -4 701.968 47.2046   8
   0  -1   4 718.134 47.9852   8
   0  -1  -4 647.734 45.6454   3
   0   1   4 687.895 44.5921   2
   0  -1  -4 672.355 45.1186   7
   0   1   4 658.927 45.1321   7
   0  -1  -5 5.17844 2.03415   7
   0   1   5 5.77954 2.11721   7
   0  -1  -5 9.70942 2.62128   3
   0  -1   5 9.99345 3.55341   8
   0  -1  -6 4254.94 272.830   3
   0  -1   6 4381.01 273.634   7
   0   1   6 4013.62 271.856   7
   0  -1   7 33.2155 6.06181   7
   0   1   7 40.9926 5.36343   7
   0  -1  -7 35.7500 5.55155   3
   0   1   8 948.764 63.7947   8
   0  -1  -8 961.173 65.7198   3
   0   1   8 984.204 64.6501   7
   0  -1   8 889.451 65.6330   7
   0   1   9 46.7034 5.61142   8
   0  -1  -9 50.2333 7.44877   3
   0   1  -9 36.7507 4.40065   2
   0   1   9 50.6505 6.72255   7
   0  -1   9 42.9525 7.37401   7
   0   1  10 394.905 28.6683   8
   0   1  10 408.228 30.8234   7
   0  -1  10 466.121 32.9029   7
   0   1 -10 376.726 32.5906   3
   0  -1 -10 461.930 32.6765   3
   0  -1  11 8.61199 6.24492   7
   0   1 -11 5.13865 5.66159   3
   0  -1 -11 9.91922 5.11639   3
   0  -1 -12 61.8281 10.1627   3
   0   1 -12 49.0319 9.75091   3
   0  -1 -13 19.2917 7.40988   3
   0   1 -13 16.5924 7.22745   3
   0   1 -14 174.817 19.2577   3
   0  -1 -14 194.434 20.9908   3
   0   1 -15-7.26463 8.29599   3
   0  -1 -15-2.61161 8.33536   3
   0   1 -15 8.54367 10.1700   1
   0   1 -16 409.271 37.9897   1
   0  -1 -16 381.102 33.7474   3
   0   1 -16 400.613 34.1836   3
   0   1 -17 7.04656 10.2791   3
   0  -1 -17 3.80688 8.36759   3
   0   1 -17 11.5058 12.3758   1
   0  -1 -18 295.915 33.8925   1
   0   1 -18 242.650 30.0415   1
   0  -1 -18 273.932 26.8027   3
   0  -1 -19 14.1037 15.9735   1
   0  -2   0 5155.24 333.193   3
   0  -2  -1 12.3971 1.86944   3
   0  -2  -2 3122.01 205.341   5
   0  -2   2 3242.25 204.795   1
   0   2   2 3119.58 204.616   5
   0   2   2 3155.71 205.038   3
   0   2  -3 154.110 15.4994   8
   0   2  -3 139.213 10.5754   1
   0  -2  -3 124.442 9.61286   5
   0   2   3 149.851 10.5845   3
   0   2   4 1955.19 158.210   2
   0   2   4 2841.81 157.867   3
   0  -2  -4 2346.24 157.450   3
   0   2  -4 2623.07 158.212   1
   0  -2  -4 2343.86 156.759   7
   0   2  -4 2333.21 162.917   8
   0  -2  -5 558.688 32.3635   3
   0   2   5 508.777 31.8314   3
   0  -2  -5 423.935 30.3227   7
   0   2  -5 411.690 35.0782   8
   0   2   5 376.891 30.6700   2
   0  -2  -6 25.0668 3.49091   7
   0   2   6 20.1076 3.10262   2
   0  -2  -6 38.0111 5.25025   3
   0   2  -6 26.0741 6.05062   8
   0  -2  -7 734.902 51.6502   3
   0  -2   8 371.660 28.5099   7
   0  -2  -8 337.808 27.4018   3
   0  -2  -9 90.9774 10.4358   3
   0  -2   9 64.9353 10.0571   7
   0  -2  10 1029.07 75.5841   7
   0   2  10 1024.48 71.8767   8
   0  -2 -11 7.36377 6.02101   3
   0   2 -11 0.54534 2.36701   2
   0  -2 -12 1383.61 96.5253   3
   0   2 -13 13.3984 7.09703   3
   0   2 -13 2.78191 8.30469   1
   0  -2 -13 13.8779 7.61337   3
   0   2 -14 346.593 30.4519   1
   0   2 -14 296.408 27.8875   3
   0  -2 -14 302.539 27.5477   3
   0   2 -15 43.2043 10.6495   3
   0   2 -15 66.2228 13.9046   1
   0  -2 -15 50.8414 11.4427   3
   0   2 -16 147.534 20.8830   1
   0   2 -16 185.859 19.9011   3
   0  -2 -16 149.866 18.9851   3
   0  -2 -17 15.5927 9.70577   3
   0   2 -17 42.1976 13.9493   1
   0   2 -17 32.2312 10.7170   3
   0  -2 -18 4.00204 9.96527   3
   0  -2 -19 17.6336 15.9392   1
   0  -3   0 0.91189 1.19564   3
   0  -3  -1 1311.12 86.1595   3
   0   3   2 690.039 45.1027   3
   0   3   2 647.508 45.6812   5
   0  -3   3 876.972 56.1624   1
   0   3   3 786.773 56.3508   3
   0   3   3 820.545 55.7497   5
   0  -3  -3 975.484 58.3123   5
   0  -3  -4 2549.95 169.929   5
   0   3   4 2943.93 170.975   3
   0  -3  -4 2343.11 170.519   3
   0   3  -4 2956.99 179.167   8
   0   3  -5 46.4781 5.57344   1
   0   3   5 41.5086 6.78271   2
   0   3  -5 43.9207 10.4597   8
   0  -3  -5 41.6538 4.23234   5
   0   3   5 47.1430 5.52554   3
   0  -3  -5 42.8732 5.26728   3
   0   3  -6 3008.69 208.380   8
   0   3  -6 3091.47 201.862   1
   0   3   6 3175.55 201.920   2
   0  -3  -6 2978.43 199.972   7
   0  -3  -6 3011.70 201.252   3
   0   3   6 3202.24 201.517   3
   0  -3  -6 3076.28 199.632   5
   0   3   7-0.43335 2.67706   2
   0   3   7 2.91819 3.60334   3
   0  -3  -7 1.11319 2.82335   3
   0   3  -7 2.59636 6.10841   8
   0  -3  -7 5.03474 2.38810   7
   0   3  -7 2.02198 3.64530   1
   0   3   8 443.218 34.0328   2
   0  -3  -8 494.004 34.5731   7
   0   3  -8 490.449 37.1269   1
   0   3  -8 579.345 40.0005   8
   0  -3  -8 561.595 36.7290   3
   0   3  -9 361.494 30.6921   1
   0  -3  -9 386.032 29.8565   3
   0  -3   9 421.349 32.5023   7
   0   3 -10 426.904 34.1976   1
   0  -3 -10 429.027 33.0146   3
   0   3 -11 340.751 30.2403   1
   0  -3 -11 375.008 29.4390   3
   0   3 -12 38.8081 9.86990   1
   0  -3 -12 32.1787 7.72588   3
   0  -3 -13 215.418 21.2678   3
   0   3 -13 233.300 22.9886   1
   0   3 -14 170.391 18.5512   3
   0  -3 -14 155.530 17.0989   3
   0  -3 -15 32.7116 9.97945   3
   0   3 -15 30.7078 10.2497   1
   0   3 -15 38.4002 10.6482   3
   0  -3 -16 294.515 30.2238   3
   0   3 -16 393.455 32.3699   3
   0   3 -16 376.746 33.3872   1
   0   3 -17 3.92235 8.95889   3
   0  -3 -17 4.04280 9.82420   3
   0  -3 -18 146.102 19.0473   3
   0  -4   0 4042.93 262.657   3
   0  -4  -1 43.0720 4.63941   3
   0   4  -2 1847.55 123.608   3
   0   4   2 1959.08 126.622   5
   0   4   3 1644.06 103.961   3
   0   4   3 1509.57 103.844   5
   0   4   4 1650.75 109.413   3
   0   4  -4 1674.70 118.152   8
   0  -4  -5 1015.52 62.6129   5
   0  -4  -5 835.776 61.7008   3
   0   4   5 909.679 61.8368   3
   0   4  -5 901.900 70.4039   8
   0  -4  -6-0.53298 2.60735   3
   0  -4  -6 3.48852 2.54414   5
   0   4   6-1.75375 3.95770   2
   0   4   6 3.93061 3.06778   3
   0   4  -6 1.87900 7.28957   8
   0  -4  -7 532.775 33.7508   7
   0   4   7 452.295 35.5743   2
   0  -4  -7 523.958 35.4341   3
   0   4   7 494.526 35.2090   3
   0   4  -7 505.214 42.9575   8
   0   4  -7 488.128 34.9636   1
   0  -4  -7 426.408 32.9115   5
   0  -4  -8 331.456 26.1697   7
   0   4   8 377.126 27.9117   2
   0   4   8 428.042 29.1829   3
   0  -4  -8 394.783 28.6521   3
   0   4  -8 432.303 35.4728   8
   0   4  -8 381.006 28.5419   1
   0  -4  -8 350.902 25.9221   5
   0  -4  -9 241.621 17.9881   7
   0   4   9 224.534 17.8948   2
   0   4  -9 250.275 24.2019   8
   0   4  -9 260.069 20.6979   1
   0  -4  -9 211.724 17.1658   5
   0  -4  -9 251.035 20.3361   3
   0   4 -10 700.737 49.2406   1
   0  -4 -10 614.057 45.3332   5
   0  -4 -10 776.199 49.5181   3
   0  -4 -11-0.91742 5.66142   3
   0   4 -11 0.97655 5.95564   1
   0  -4 -11 3.69923 3.54649   5
   0   4 -12 613.143 49.8005   1
   0  -4 -12 730.783 50.5238   3
   0  -4 -13 45.8704 9.77898   3
   0   4 -13 25.3978 8.48942   1
   0   4 -14 169.118 19.5631   1
   0  -4 -14 206.191 20.5349   3
   0   4 -15 173.420 20.7263   1
   0  -4 -15 179.482 20.8094   3
   0  -4 -16 84.2218 14.6024   3
   0   4 -16 109.925 16.5054   3
   0  -4 -17 97.1406 15.5817   3
   0   4 -17 103.405 16.0358   3
   0  -4 -18 12.7232 10.9985   3
   0  -5   0 0.39477 1.74227   3
   0  -5  -1 2389.90 156.745   3
   0   5   2 754.731 48.5204   5
   0   5  -2 655.898 42.5862   3
   0   5   3 1980.69 143.466   5
   0   5  -3 2344.44 143.187   3
   0  -5   4 429.226 28.2569   1
   0   5  -4 367.690 36.4218   8
   0   5   4 383.068 28.5228   5
   0   5   4 413.879 29.2044   3
   0   5   5 54.0097 7.07139   3
   0  -5  -5 43.7754 6.12436   3
   0   5  -6 892.390 73.0752   8
   0  -5  -6 900.189 63.5578   3
   0   5   6 945.885 63.5146   3
   0   5   6 955.685 69.2612   2
   0   5  -7 132.241 19.6179   8
   0  -5  -7 111.843 11.2930   3
   0   5   7 97.4125 12.7884   2
   0   5   8 264.100 24.2779   2
   0  -5  -8 336.260 23.1167   5
   0   5  -8 322.691 32.6775   8
   0  -5  -8 286.809 23.8685   3
   0  -5  -8 283.997 21.7612   7
   0   5   9 699.174 50.2753   2
   0  -5  -9 646.839 48.1191   5
   0   5  -9 814.985 59.3071   8
   0  -5  -9 782.158 51.5397   3
   0  -5  -9 712.385 48.2563   7
   0   5  10 192.710 15.3190   2
   0   5 -10 231.263 23.6254   8
   0  -5 -10 228.384 14.9562   7
   0  -5 -10 204.231 17.7718   3
   0  -5 -11 359.823 29.7344   3
   0  -5 -12 4.24356 6.55084   3
   0  -5 -13 485.693 39.1696   3
   0  -5 -14 13.5243 9.00233   3
   0  -5 -15 154.902 18.9093   3
   0   5 -16 120.130 17.9180   3
   0  -5 -16 88.3410 15.3483   3
   0  -5 -17 7.11146 10.3753   3
   0  -5 -18 66.9380 15.0402   3
   0  -6   0 1871.97 123.989   3
   0  -6  -1 110.143 10.1444   3
   0  -6  -2 524.796 39.6282   3
   0   6   2 734.824 48.3588   5
   0   6   3 1460.23 99.7885   5
   0   6   4 374.368 28.7510   5
   0   6   4 374.954 28.5385   3
   0  -6   4 415.556 27.5409   1
   0   6  -5 789.791 67.1822   8
   0   6   5 787.861 57.1617   3
   0  -6  -5 780.001 57.5821   3
   0   6   5 901.517 56.1349   5
   0   6  -6 2.29633 9.16765   8
   0  -6  -6 2.66634 3.55168   3
   0   6  -7 1110.70 83.9852   8
   0   6   7 1092.97 77.6756   2
   0  -6  -7 1006.15 72.3569   3
   0  -6  -8 66.3175 7.60762   7
   0   6  -8 78.3353 16.3355   8
   0   6   8 63.7697 11.2455   2
   0  -6  -8 60.1105 9.10377   3
   0   6  -9 454.185 41.9403   8
   0  -6  -9 416.111 29.4330   7
   0   6   9 396.403 32.8825   2
   0  -6  -9 392.234 31.9423   3
   0   6 -10 169.225 23.9555   8
   0  -6 -10 198.035 18.7130   3
   0   6  10 197.046 17.6184   2
   0  -6 -10 183.572 15.0921   7
   0   6  11 4.36488 4.31354   2
   0  -6 -11-1.01381 6.47082   3
   0  -6 -12 316.555 27.7658   3
   0  -6 -13 73.5210 12.1717   3
   0  -6 -14 122.750 16.6784   3
   0  -6 -15 214.441 22.7557   3
   0  -6 -16 59.4367 13.3553   3
   0  -6 -17 97.8500 16.7467   3
   0  -6 -18-4.65826 11.0335   3
   0  -7   0 0.56902 2.93246   3
   0  -7  -1 1735.42 127.081   3
   0   7  -1 1966.57 127.244   3
   0  -7  -2 154.514 14.9377   3
   0   7  -2 195.241 15.5185   3
   0   7   3 1833.99 141.445   5
   0   7  -3 2260.26 139.142   3
   0   7  -4 27.4296 5.53431   3
   0   7   4 25.3251 5.34698   5
   0   7   5 144.482 13.0294   5
   0  -7   5 171.969 12.4219   1
   0  -7  -5 140.354 14.0728   3
   0  -7  -6 149.504 14.2951   3
   0   7   7 38.6121 13.8192   2
   0  -7  -7 61.5183 8.68607   3
   0  -7  -8 92.1252 11.5630   3
   0   7   8 88.4458 14.5341   2
   0  -7  -9 832.487 63.3768   3
   0   7   9 915.455 66.3994   2
   0  -7  -9 910.166 60.8737   7
   0  -7 -10 92.4758 13.4331   3
   0   7  10 114.461 14.2711   2
   0  -7 -10 125.059 10.7745   7
   0   7  11 701.858 51.9427   2
   0  -7 -11 741.880 48.8248   7
   0  -7 -11 648.650 52.7650   3
   0  -7 -12 8.29950 7.72919   3
   0   7  12-0.66923 4.71313   2
   0  -7 -13 598.238 47.2194   3
   0  -7 -14-5.43376 9.73976   3
   0  -7 -15 109.641 16.7383   3
   0  -7 -16 3.05809 10.8628   3
   0  -7 -17-1.60355 10.9838   3
   0  -7 -18 22.5826 12.7803   3
   0  -8   0 238.441 19.8399   3
   0  -8  -1 76.1868 9.10558   3
   0   8   1 109.515 20.5494   5
   0  -8  -2 37.3157 6.18467   3
   0   8   2 34.5099 12.4571   5
   0   8   3 1405.00 99.4552   5
   0   8   4 82.8659 10.4069   5
   0  -8   5 1065.71 66.9943   1
   0   8   5 898.272 68.5569   5
   0  -8  -6 15.9452 5.45434   3
   0   8   7 856.929 65.6790   2
   0  -8  -7 731.620 54.8268   3
   0  -8  -8 5.50608 5.47015   3
   0   8   8 3.78566 8.91010   2
   0  -8  -9 311.994 26.1323   3
   0   8   9 283.167 29.1154   2
   0   8  10 9.90646 7.12233   2
   0  -8 -10 14.6237 5.06186   7
   0  -8 -10 29.5151 8.42023   3
   0   8  11 3.53660 7.70422   2
   0  -8 -11 10.2293 4.26116   7
   0  -8 -11 10.7280 8.25980   3
   0   8  12 26.7092 7.86020   2
   0  -8 -12 38.8040 10.5866   3
   0  -8 -13 60.1096 12.7936   3
   0  -8 -14 8.71345 10.0560   3
   0  -8 -15 202.538 23.3750   3
   0  -8 -16 6.21235 10.3400   3
   0  -8 -17 124.274 19.1100   3
   0  -9   0-0.76152 4.11609   3
   0  -9  -1 1199.14 85.1404   3
   0   9   1 1486.30 105.872   5
   0   9   2-2.27684 9.81960   5
   0  -9  -2 5.31326 4.04736   3
   0   9   3 835.946 61.2237   5
   0   9   3 772.596 51.5592   4
   0  -9  -3 817.836 56.1193   3
   0   9   4 3.13541 5.56606   5
   0   9   5 135.839 13.9436   5
   0  -9   5 149.186 11.7900   1
   0  -9  -6 6.98800 5.66881   3
   0   9   6 11.3960 4.45737   5
   0   9   7 10.4699 11.3449   2
   0  -9  -7 20.4703 6.47835   3
   0   9   8 11.3961 12.1320   2
   0  -9  -8 0.99873 5.94596   3
   0   9   9 522.331 47.5244   2
   0  -9  -9 559.476 42.7931   3
   0  -9 -10 1.15248 7.67172   3
   0  -9 -10 5.21205 4.59866   7
   0   9  10 5.14527 8.98814   2
   0  -9 -11 410.543 32.3421   3
   0   9  11 312.336 31.7568   2
   0   9  12 1.19332 7.87569   2
   0  -9 -12 20.9289 9.46677   3
   0  -9 -13 399.084 34.9385   3
   0  -9 -14-4.41865 10.4660   3
   0  -9 -15 63.6925 14.5337   3
   0  -9 -16 6.47213 10.9854   3
   0  10   0 211.596 36.6233   5
   0 -10  -1 106.490 12.1600   3
   0  10   1 90.6626 21.9905   5
   0  10   2 46.7790 14.6156   5
   0 -10  -2 29.3530 6.96836   3
   0 -10  -3 804.447 62.9321   3
   0  10   3 1079.81 70.4148   5
   0 -10   4 1.92669 1.59358   4
   0  10   4-2.41498 7.18556   5
   0 -10   5 861.238 59.0249   1
   0  10   5 932.851 63.5120   5
   0 -10  -6-0.97701 5.12178   3
   0  10   6 6.35080 4.43570   5
   0 -10  -7 722.600 54.5363   3
   0  10   7 799.123 69.9022   2
   0 -10  -8 59.1031 10.6586   3
   0  10   8 44.5920 15.6156   2
   0 -10  -9 209.767 20.9784   3
   0  10   9 200.534 26.3447   2
   0 -10 -10 31.6544 9.81649   3
   0  10  10 22.1667 11.8238   2
   0 -10 -11 5.18302 8.88606   3
   0  10  11 8.70615 9.42111   2
   0 -10 -12 8.28298 8.71575   3
   0  10  12-1.45319 9.57323   2
   0 -10 -13-2.92070 10.0982   3
   0 -10 -14 10.7757 11.1463   3
   0 -10 -15 154.133 21.3204   3
   0  11   0 27.1945 20.0777   5
   0 -11  -1 733.401 54.6717   3
   0  11   1 776.756 71.5234   5
   0  11  -1 751.885 79.4964   5
   0 -11  -2 36.3632 8.15003   3
   0  11   2 38.3589 14.2283   5
   0  11   3 333.859 33.9215   5
   0 -11  -3 377.104 30.1443   3
   0  11   4 35.1315 9.77880   5
   0  11   5 6.41648 6.23353   5
   0 -11   5 9.69318 2.44675   4
   0  11   5 10.5334 3.29339   4
   0  11   6 86.8776 11.1281   5
   0 -11  -6 117.309 14.0871   3
   0 -11  -7-2.25437 6.95605   3
   0  11   7-3.39821 14.6521   2
   0 -11  -8 14.1946 8.24108   3
   0  11   8 20.8154 14.5728   2
   0 -11  -9 278.547 25.6687   3
   0  11   9 238.548 31.6504   2
   0 -11 -10-1.28912 9.15733   3
   0  11  10-2.31742 11.3296   2
   0  11  11 245.414 28.6730   2
   0 -11 -11 241.812 24.5758   3
   0 -11 -12 15.9315 10.6046   3
   0 -11 -13 297.373 29.5886   3
   0 -11 -14 52.7645 14.0400   3
   0  12   0 106.599 27.3068   5
   0  12   1 17.6060 17.2498   5
   0  12  -1 16.5057 23.1761   5
   0 -12  -2 100.670 13.8620   3
   0  12   2 136.344 22.0861   5
   0 -12  -3 125.160 15.3965   3
   0  12   3 127.654 18.7414   5
   0  12   4 51.3958 11.2021   5
   0  12   5 299.878 27.0735   5
   0  12   6 4.11956 5.64878   5
   0 -12  -6 3.48746 6.92171   3
   0  12   7 308.937 44.1531   2
   0 -12  -7 364.001 31.0717   3
   0 -12  -8 45.8087 10.9894   3
   0  12   8 33.2753 18.4601   2
   0  12   9 92.0051 22.1581   2
   0 -12  -9 121.179 16.0421   3
   0  12  10 38.9922 16.0426   2
   0 -12 -10 38.2288 11.5721   3
   0  12  11 20.4693 12.8621   2
   0 -12 -11 7.45094 9.43677   3
   0 -12 -12 61.0069 14.8003   3
   0 -12 -13 1.63729 10.7835   3
   0  13   0 17.6757 18.6276   5
   0  13  -1 229.927 44.9565   5
   0  13   1 359.432 41.5179   5
   0  13   2 8.14461 12.5314   5
   0  13  -2 19.1349 24.0133   5
   0  13   3 203.246 24.3748   5
   0 -13  -3 228.952 21.1687   3
   0  13   4 166.351 20.1737   5
   0  13   5-5.06744 7.45061   5
   0  13   6 134.929 35.3035   2
   0 -13  -6 225.316 22.3500   3
   0 -13  -7 10.5948 9.41830   3
   0  13   7-4.29754 19.8133   2
   0 -13  -8 71.1375 13.4192   3
   0  13   8 32.2159 19.4255   2
   0  13   9 85.6940 21.9604   2
   0 -13  -9 79.5802 14.9116   3
   0  13  10 14.3866 15.0881   2
   0 -13 -10 8.97755 10.3677   3
   0  13  11 55.3978 18.1042   2
   0 -13 -11 76.8838 15.6750   3
   0 -13 -12 3.28122 11.2392   3
   0  14   0 278.574 43.5720   5
   0  14   1 3.48561 14.6663   5
   0  14  -1-10.4790 21.4876   5
   0  14  -2 75.3079 37.1814   5
   0  14   2 133.304 23.1508   5
   0  14  -3-21.4834 28.6699   5
   0  14   3 63.6924 15.6294   5
   0  14  -4 23.2854 29.2150   5
   0  14   4 11.8270 9.81308   5
   0 -14  -4 3.97956 8.66262   3
   0  14  -5 8.35493 29.4166   5
   0  14  -6-8.68785 31.6595   5
   0  14   6-4.79439 20.6744   2
   0  14   7 151.191 35.2734   2
   0 -14  -7 145.288 19.1680   3
   0 -14  -8 29.7341 11.1907   3
   0  14   8 34.5830 21.1731   2
   0 -14  -9 67.9729 15.1186   3
   0  14   9 83.1522 24.1806   2
   0 -14 -10 94.6461 17.3132   3
   0  14  10 96.9924 23.7985   2
   0  15   0-16.8271 17.7333   5
   0  15  -1 20.3589 22.9946   5
   0  15   1 16.9900 15.0398   5
   0  15  -2 29.7104 29.2266   5
   0  15   2 57.5469 18.1494   5
   0  15   3 25.8315 13.5389   5
   0  15  -3 27.3591 28.8278   5
   0  15  -4 23.2036 30.9095   5
   0  15   5 42.5876 28.3533   2
   0  15  -5-8.28041 32.1396   5
   0  15   6 63.7186 32.7617   2
   0  15  -6-26.1780 37.6238   5
   0  15   7-4.58710 19.3016   2
   0 -15  -7 6.14348 10.4223   3
   0  15  -7 9.16386 33.3923   5
   0  15   8 36.6893 23.7899   2
   0 -15  -8 54.2022 14.4718   3
   0  15  -8-9.48309 34.6555   5
   0  15   9 7.45608 18.2317   2
   0  15  10 26.8728 18.2372   2
   0  16   0 116.892 29.1150   5
   0  16   1-3.31817 15.6113   5
   0  16  -1-4.86111 20.4549   5
   0  16   2 37.7563 15.1960   5
   0  16  -2 33.6834 25.4405   5
   0  16  -3-6.36300 23.9496   5
   0  16   4-5.85243 25.8297   2
   0  16  -4-7.20259 25.3587   5
   0  16   5 5.84038 28.0183   2
   0  16  -5-7.81689 28.4835   5
   0  16   6-10.7453 26.7487   2
   0  16  -6 8.51191 34.9085   5
   0  16   7-4.71827 23.4915   2
   0  16   8 21.3658 21.6939   2
   0  16   9 23.7719 21.4680   2
   0  17   0 11.4719 16.5034   5
   0  17   1 6.44494 17.1528   5
   0  17  -1-13.5753 19.9707   5
   0  17  -2 42.4050 26.5298   5
   0  17  -3 6.04695 25.4458   5
   0  17  -4 26.7362 30.8558   5
   0  18  -1 8.59254 20.6181   5
   1   0 -18 233.872 27.3510   3
   1   0 -17-1.56051 10.0659   3
   1   0 -16 292.747 28.2585   3
   1   0 -15-3.97243 7.88329   3
   1   0 -14 281.805 26.2766   3
   1   0 -13 1.20122 6.19054   3
   1   0 -12 144.237 16.3672   3
   1   0 -11-2.95326 4.16495   2
  -1   0  11 0.87220 5.06378   7
   1   0 -11-8.64170 6.26917   3
   1   0 -10 802.066 58.4821   3
   1   0 -10 724.421 55.1587   2
  -1   0  10 921.584 57.7601   7
  -1   0   9-1.46439 4.35712   7
   1   0  -9-2.88832 5.12429   3
   1   0  -9 1.07277 3.19209   2
   1   0  -8 727.146 50.3236   2
  -1   0   8 732.023 51.5959   7
  -1   0   7 1.19664 3.37752   7
   1   0  -7-0.40754 2.57212   2
   1   0  -6 2652.85 184.288   2
  -1   0   6 3075.36 185.700   7
   1   0  -5-0.65634 1.77373   2
  -1   0   5-0.45279 2.21361   7
   1   0  -5 0.46691 2.28267   7
  -1   0   4 1859.15 125.524   7
   1   0  -4 1946.56 125.407   7
  -1   0   3 0.31303 1.71740   7
  -1   0   2 681.850 45.7060   7
  -1   0  -1 4.61297 1.80818   1
   1   0   2 431.076 29.9868   2
  -1   0  -2 553.006 33.7752   5
  -1   0  -3 0.25885 0.91136   3
  -1   0  -4 850.832 56.4057   3
  -1   0  -5 0.30135 1.67742   3
   1   0   6 3501.30 222.977   7
   1   0   6 3356.84 224.287   8
  -1   0  -6 3371.04 222.747   3
  -1   0  -7 0.46384 2.69187   3
   1   0   7 2.27991 2.94271   7
   1   0   7 2.12839 3.33886   8
   1   0   8 1503.22 101.322   7
   1   0   8 1464.53 103.217   8
  -1   0  -8 1572.97 101.757   3
  -1   0  -9-0.62208 3.70301   3
   1   0   9 3.99173 3.79505   7
   1   0   9 3.62077 4.50759   8
   1   0  10 885.189 57.9590   7
  -1   0 -10 835.353 58.4921   3
   1   0  10 749.202 59.3364   8
   1   0  11 1.76088 4.75853   8
   1   0  11 1.30940 4.17771   7
  -1   0 -11-1.55063 4.67076   3
   1   0  12-0.69690 5.07901   7
  -1   0 -12-0.86789 5.16450   3
  -1   0 -13 3.97261 5.98849   3
  -1   0 -14 60.8768 12.4943   3
  -1   0 -15 4.30938 6.95079   3
  -1   0 -15-1.96195 10.9215   1
  -1   0 -16 349.861 38.4750   1
  -1   0 -16 436.747 34.0510   3
  -1   0 -17 2.19797 11.3265   1
  -1   0 -17-1.10616 7.92583   3
  -1   0 -18 261.828 31.8604   1
  -1   0 -19 6.90477 14.2065   1
   1   1 -18 67.8210 14.3383   3
   1  -1 -18 51.6091 13.6228   3
   1   1 -17 23.1870 12.1488   1
   1  -1 -17 24.1018 10.9394   3
   1   1 -17 7.14906 9.57311   3
   1   1 -16 112.625 17.1639   3
   1  -1 -16 125.788 18.3655   3
   1  -1 -15 38.1506 11.1484   3
   1   1 -15 14.8452 8.83849   3
   1   1 -14 325.240 29.0020   3
   1  -1 -14 295.934 28.1206   3
   1  -1 -13 1.16971 6.41698   3
   1   1 -13-1.27532 6.68058   3
   1  -1 -12 1137.48 61.0109   3
   1   1 -12 1147.03 62.4888   3
   1  -1 -11 11.1816 6.37008   3
   1   1 -11 8.12181 3.98041   2
   1  -1 -10 1201.76 87.9546   3
  -1  -1  10 1264.35 87.8944   7
   1   1 -10 1308.63 85.1072   2
  -1  -1   9 56.7379 8.53611   7
   1  -1  -9 28.9527 7.69462   2
   1   1  -9 50.5728 6.28222   2
   1  -1  -9 47.6406 7.87377   3
  -1  -1   8 1187.48 80.0957   7
   1  -1  -8 1144.34 79.8604   3
   1  -1  -8 1141.93 79.3687   2
  -1   1   7 73.0673 8.37068   7
  -1  -1   7 78.9015 9.27553   7
   1  -1  -7 88.7543 8.68842   7
   1  -1  -7 71.9896 8.95278   2
   1  -1  -7 76.9436 9.06530   3
  -1  -1   6 318.940 24.1869   7
   1  -1  -6 292.608 22.8973   7
   1   1  -6 327.950 22.1138   8
   1  -1  -6 292.687 23.4871   2
   1  -1  -6 301.460 23.8220   3
   1   1  -5 35.9223 5.34065   8
   1  -1  -5 47.9175 5.75562   2
  -1  -1   5 47.4698 6.09067   7
   1  -1  -5 32.8430 4.67943   7
   1  -1  -4 2548.71 169.263   7
  -1  -1   4 2652.34 170.205   7
  -1   1   4 2558.68 169.203   2
   1  -1  -4 2625.86 170.061   2
  -1   1   3 24.5508 3.37915   2
  -1   1   3 24.6398 3.41670   8
  -1  -1   3 20.9465 4.05965   7
   1  -1  -3 19.7993 3.21878   7
   1  -1  -3 27.2066 4.15598   2
   1  -1  -2 2709.45 168.788   3
  -1   1   2 2476.16 169.545   8
   1  -1  -2 2489.52 170.278   8
   1  -1  -2 2495.86 169.585   2
  -1  -1   2 2698.58 169.239   7
  -1  -1   1 519.545 33.3021   7
   1  -1  -1 462.419 33.2184   5
   1  -1  -1 490.122 32.7116   3
   1  -1  -1 489.190 35.3523   8
  -1   1   0 5080.10 317.514   2
   1   1   0 4496.05 315.827   7
   1  -1   0 4965.31 316.059   6
  -1   1   0 5417.58 317.086   5
  -1   1   0 4852.84 318.196   8
  -1   1  -1 422.867 28.8848   2
   1   1   1 387.915 26.7413   3
  -1   1  -1 422.660 29.8804   8
  -1   1  -1 502.134 31.2552   5
  -1   1  -2 4567.96 245.765   2
  -1   1  -2 4240.26 246.707   8
   1   1   2 3730.84 243.030   3
  -1  -1  -2 3502.91 243.043   3
   1  -1   2 3906.12 245.081   1
  -1   1  -3 1087.20 87.3056   1
  -1  -1  -3 1583.79 87.9467   5
   1  -1   3 1357.98 89.2115   8
  -1   1  -3 1479.27 87.6895   2
   1   1   3 1238.56 85.3232   3
  -1  -1  -3 1311.20 85.3026   3
   1  -1   4 3687.78 241.882   8
  -1   1  -4 3495.59 240.583   1
   1   1   4 3536.25 237.187   7
  -1   1  -4 4107.73 239.969   2
   1   1   4 3635.44 238.000   3
  -1  -1  -4 3816.98 237.871   3
  -1   1  -5 178.225 16.8557   1
  -1   1  -5 185.337 15.2958   2
  -1  -1  -5 233.885 15.2380   3
   1   1   5 189.778 13.8144   7
   1  -1   5 177.344 17.4253   8
   1   1   6 29.5379 3.61666   7
  -1   1  -6 23.0411 4.02617   2
   1  -1   6 29.3241 6.50312   8
  -1  -1  -6 37.1759 4.92881   3
   1   1   7 61.2187 6.41640   7
   1  -1   7 53.9112 9.16821   8
   1   1   8 728.729 54.5270   7
   1  -1   8 881.933 57.1269   7
   1  -1   8 761.182 58.9467   8
  -1  -1  -8 920.571 56.6229   3
   1  -1   9 68.1321 11.1561   8
   1   1   9 91.6325 8.88214   7
   1  -1   9 100.031 10.9283   7
   1   1   9 88.4498 10.2170   8
  -1   1  -9 108.368 10.9998   3
  -1  -1  -9 113.405 10.7441   3
   1  -1  10 1116.77 76.8203   7
   1   1  10 1124.12 75.0387   7
  -1   1 -10 1076.00 76.9115   3
  -1  -1 -10 1258.84 77.9622   3
   1  -1  10 1039.58 78.4264   8
   1   1  10 1054.51 76.7081   8
   1   1  11-0.53914 3.82992   7
  -1   1 -11 0.82342 4.71260   3
  -1  -1 -11-0.96473 5.21431   3
   1  -1  11 2.38527 5.28972   7
   1   1  11 2.47869 4.32837   8
  -1   1 -12 1107.49 82.5228   1
   1  -1  12 1128.17 78.2902   7
  -1   1 -12 1075.13 78.2710   3
  -1  -1 -12 1284.12 79.6336   3
   1   1  12 1056.39 77.0775   8
  -1   1 -13 2.84509 5.78966   3
  -1   1 -13 8.20025 8.73338   1
  -1   1 -14 399.934 32.4587   3
  -1  -1 -14 398.945 32.2144   3
  -1   1 -14 378.018 36.5881   1
  -1  -1 -15 9.35877 6.79893   3
  -1   1 -15 5.50492 7.34377   3
  -1   1 -15 11.2955 10.6405   1
  -1   1 -16 194.012 20.5370   3
  -1  -1 -16 122.384 16.6487   3
  -1  -1 -16 151.942 24.2051   1
  -1   1 -16 133.424 20.8708   1
  -1  -1 -17 20.2336 9.20092   3
  -1  -1 -17 23.0004 14.4197   1
  -1   1 -17 22.3351 13.8440   1
  -1   1 -18 20.7084 12.8686   1
  -1  -1 -18 29.0110 16.1571   1
  -1  -1 -19 9.94037 13.6482   1
   1  -2 -19 11.7438 11.0748   3
   1   2 -18 270.253 26.0578   3
   1  -2 -18 184.162 24.1547   3
   1  -2 -17 2.81438 9.36482   3
   1   2 -17 5.75151 10.7403   3
   1   2 -17 3.30420 10.6589   1
   1   2 -16 405.665 35.2974   3
   1  -2 -16 403.315 34.7802   3
   1   2 -16 362.163 35.2835   1
   1   2 -15 1.41286 8.52542   3
   1  -2 -15 15.3759 9.12433   3
   1  -2 -14 222.667 23.0789   3
   1   2 -14 166.488 20.5427   3
   1  -2 -13 51.4900 11.5107   3
   1   2 -13 49.6085 11.5460   3
   1  -2 -12 114.718 14.2504   3
   1  -2 -11 79.3862 11.4560   3
   1   2 -11 99.3116 9.67500   2
   1  -2 -10 312.591 26.3790   3
   1  -2  -9 292.968 23.1187   3
   1  -2  -9 267.242 21.6203   7
  -1  -2   9 245.031 22.9953   7
   1  -2  -8 1035.89 68.1368   3
   1   2  -8 952.396 66.6763   8
   1  -2  -8 983.451 66.8070   7
  -1  -2   8 927.212 68.5626   7
   1  -2  -7 249.010 20.5754   3
  -1  -2   7 259.450 21.5453   7
   1  -2  -7 257.806 19.7921   7
  -1   2   7 247.174 18.4349   8
   1   2  -7 260.132 21.5091   8
  -1   2   6 3663.24 234.141   8
   1   2  -6 3775.03 237.811   8
   1  -2  -6 3706.60 235.031   3
   1  -2  -6 3283.24 237.130   2
   1  -2  -6 3710.32 234.232   7
  -1  -2   6 3909.56 236.627   7
  -1   2   6 3237.28 233.624   2
   1  -2  -5 14.1892 3.23169   7
  -1  -2   5 15.9765 4.46284   7
  -1   2   5 12.8615 3.18319   2
   1  -2  -5 6.56239 4.90257   2
  -1   2   4 3521.45 230.754   3
  -1   2   4 3496.56 231.108   2
  -1  -2   4 3454.78 231.960   7
   1  -2  -4 3758.09 234.126   2
  -1   2   3 1486.09 87.1032   8
  -1   2   3 1338.88 85.4828   2
   1  -2  -3 1197.42 83.9059   3
   1  -2  -3 1375.73 83.9593   5
   1  -2  -2 5228.06 311.640   2
  -1   2   2 4566.85 311.281   8
   1  -2  -2 4143.65 307.944   5
  -1   2   2 4750.50 307.864   5
   1  -2  -2 5164.92 307.638   3
   1  -2  -1 528.162 34.9182   3
  -1   2   1 540.501 35.2106   4
  -1  -2   1 523.581 35.2885   4
   1  -2  -1 468.481 36.4014   5
  -1  -2   0 4.01548 1.23062   6
   1  -2   0 1.18204 1.08562   6
  -1   2   0 2.49021 1.12728   6
   1   2   0 1.82376 1.25438   6
   1  -2   0 1.33007 1.14337   4
   1   2   0 0.16865 1.02113   4
   1  -2   0 0.80261 3.29312   5
   1  -2   0 1.65017 0.93118   3
  -1   2   0 2.99726 4.88534   8
  -1   2   0 1.52623 3.29173   2
  -1   2  -1 193.526 17.9131   8
   1  -2   1 154.031 11.1393   3
   1   2   1 163.943 11.4163   3
  -1   2  -1 151.966 11.0969   3
  -1   2  -2 3413.70 210.602   3
   1   2   2 3113.16 210.746   3
  -1   2  -2 2981.18 216.884   8
   1  -2   3 14.1873 3.63364   1
   1   2   3 20.3199 2.61293   3
  -1  -2  -3 24.8101 2.82120   3
   1  -2   3 32.6167 7.38382   8
  -1   2  -3 24.0767 6.65588   8
  -1   2  -4 2443.97 172.385   8
   1  -2   4 2744.17 174.286   8
  -1  -2  -4 2558.03 167.342   3
   1   2   4 2602.27 167.359   3
  -1   2  -4 2515.66 169.501   1
  -1   2  -5-0.68124 3.14038   1
  -1   2  -5-1.88293 3.75836   8
   1   2   5 0.61797 1.99372   3
   1  -2   5-1.19955 4.78845   8
  -1  -2  -5 3.37691 2.00179   3
   1   2   6 3244.63 221.720   2
   1  -2   6 3666.97 229.575   8
   1   2   6 3790.10 223.460   3
  -1  -2  -6 3434.70 222.883   3
  -1   2  -6 3237.87 225.666   1
  -1   2  -7 28.7517 6.89762   1
   1  -2   7 46.0593 9.26646   8
  -1  -2  -7 34.2951 5.30241   3
  -1   2  -8 945.435 73.0197   1
   1  -2   8 1146.96 75.7316   8
  -1  -2  -8 1152.62 70.4086   3
  -1   2  -8 853.130 71.9244   2
  -1  -2  -9 120.601 10.5705   3
  -1   2  -9 88.0826 12.4755   1
   1  -2   9 104.414 12.9881   8
  -1   2 -10 763.772 60.8832   1
   1  -2  10 852.849 59.4428   7
  -1  -2 -10 831.548 57.7348   3
  -1   2 -11 103.567 13.9810   1
   1   2  11 82.2206 9.59044   8
  -1   2 -11 69.4003 10.4997   3
   1  -2  11 89.5564 11.7401   7
  -1  -2 -11 68.5710 9.72112   3
  -1   2 -12 31.0866 7.83187   3
  -1  -2 -12 35.5526 7.84968   3
   1   2  12 29.3447 6.38276   8
  -1   2 -12 44.1189 11.1008   1
   1   2  13 55.1126 8.48545   8
  -1   2 -13 73.5697 13.8360   1
  -1  -2 -13 82.4187 11.0665   3
  -1   2 -14 108.333 14.3512   3
  -1   2 -14 112.742 17.2845   1
  -1  -2 -14 148.093 15.3581   3
  -1  -2 -15 26.5051 8.54684   3
  -1   2 -15 28.9002 9.08322   3
  -1   2 -15 33.0463 12.9129   1
  -1  -2 -16 226.651 22.8148   3
  -1   2 -16 239.756 23.3093   3
  -1   2 -16 232.871 26.7691   1
  -1  -2 -17 1.17605 8.20878   3
  -1   2 -17-9.26433 11.0274   1
  -1  -2 -18 180.934 27.4036   1
  -1  -2 -19 5.28649 14.9250   1
   1  -3 -19 47.1122 13.2987   3
   1  -3 -18-2.95928 9.74598   3
   1   3 -18 8.76946 10.4737   3
   1  -3 -17 54.7583 12.9517   3
   1   3 -17 67.5116 14.2140   3
   1  -3 -16 95.9164 15.8287   3
   1   3 -16 121.253 17.4525   3
   1   3 -16 110.904 16.7734   1
   1  -3 -15 90.1472 15.0627   3
   1   3 -15 116.949 17.0974   3
   1   3 -15 116.609 15.9811   1
   1  -3 -14 172.608 19.2230   3
   1   3 -14 182.105 20.2300   1
   1   3 -13 20.7209 8.55424   1
   1  -3 -13 4.69312 6.56484   3
   1  -3 -12 693.643 52.2985   3
   1  -3 -11 2.18152 6.49195   3
   1  -3 -10 984.668 66.2979   3
   1  -3 -10 858.025 62.5421   7
   1  -3  -9 167.585 16.6936   3
   1  -3  -9 156.646 13.7664   7
  -1   3   9 141.127 12.3738   8
   1   3  -9 146.113 15.3398   8
  -1   3   8 392.954 28.2383   2
   1  -3  -8 474.015 32.2635   3
  -1  -3   8 345.242 30.8755   7
   1  -3  -8 382.873 28.6549   7
   1   3  -8 383.134 32.5713   8
  -1   3   8 367.825 28.8214   8
  -1   3   7 288.483 22.0641   2
   1  -3  -7 327.487 24.1105   3
   1  -3  -7 266.568 21.6847   7
  -1  -3   7 302.237 24.8733   7
   1   3  -7 262.367 26.3479   8
  -1  -3   6 14.0661 5.65352   7
   1  -3  -6 15.7245 3.73607   7
  -1   3   6 7.04276 4.43856   3
   1  -3  -6 12.3599 3.69822   3
   1  -3  -6 9.80988 3.03609   5
  -1   3   6 7.26716 3.62673   2
   1   3  -6 12.3080 5.94611   8
   1  -3  -5 405.406 28.1704   5
  -1   3   5 385.051 29.9810   2
  -1   3   5 383.581 28.8599   3
   1  -3  -4 396.051 27.7906   5
  -1   3   4 375.817 29.9810   2
  -1   3   4 381.154 27.6908   3
   1  -3  -3 1188.04 87.2898   5
  -1   3   3 1332.21 86.9414   5
   1  -3  -3 1290.95 86.8102   3
   1  -3  -2 317.683 25.6695   5
  -1   3   2 361.229 25.2471   5
   1  -3  -2 338.203 23.8860   3
   1  -3  -1 190.946 14.3247   3
  -1   3   1 205.815 14.1465   4
  -1  -3   1 196.817 14.1681   4
  -1   3   1 158.248 16.0475   5
   1  -3   0 4947.24 332.230   3
   1   3   0 5205.79 331.910   4
   1  -3   0 5279.31 331.893   4
  -1   3   0 5060.59 331.906   6
   1  -3   1 8.46571 1.78365   3
   1   3   1 6.98305 1.99465   3
  -1   3  -1 6.95343 1.82967   3
  -1   3  -1 10.0596 7.04240   8
  -1   3  -2 1350.85 101.682   8
  -1   3  -2 1455.77 93.0047   3
   1   3   2 1390.84 93.1508   3
  -1   3  -3 962.600 72.0690   8
  -1  -3  -3 842.712 62.7914   3
  -1   3  -3 1037.56 62.9069   3
   1  -3   3 908.351 63.9615   1
   1   3   3 957.382 62.8813   3
   1  -3   4 1150.87 75.2992   1
  -1  -3  -4 1128.66 73.8108   3
   1   3   4 1064.21 73.4937   3
   1  -3   4 1236.13 82.5352   8
  -1   3  -4 1043.40 82.0420   8
  -1  -3  -5 1245.94 86.4248   3
   1   3   5 1371.20 86.5826   3
   1  -3   5 1438.46 94.8223   8
  -1   3  -5 1162.66 93.4327   8
   1   3   6 5.24406 2.87498   3
  -1   3  -6 1.45967 3.70524   1
  -1  -3  -6 4.63755 2.55069   3
  -1   3  -6-1.38220 5.20702   8
  -1   3  -7 688.657 53.3196   1
  -1  -3  -7 762.631 51.3328   3
   1   3   7 817.979 51.6537   3
  -1   3  -7 694.211 56.0039   8
   1   3   7 712.941 50.6317   2
  -1   3  -8 134.910 15.0677   1
   1   3   8 130.847 10.4260   2
  -1  -3  -8 171.139 13.3234   3
  -1  -3  -9 104.641 11.1825   3
  -1   3  -9 118.312 13.6245   1
  -1  -3 -10 633.816 36.1915   3
  -1   3 -10 569.374 38.6104   1
  -1   3 -11 0.70947 5.13153   2
  -1   3 -11 7.47055 6.31192   1
  -1  -3 -11 3.16258 5.04964   3
   1   3  12 691.821 54.6830   8
  -1  -3 -12 898.544 57.4047   3
  -1   3 -12 829.960 60.1017   1
  -1   3 -13 21.3771 8.37117   3
  -1   3 -13 7.13898 7.87135   1
   1   3  13 9.85685 5.15715   8
  -1  -3 -13 13.3844 6.47039   3
  -1   3 -14 220.448 21.7786   3
  -1  -3 -14 227.613 21.2535   3
  -1   3 -14 196.403 23.3245   1
  -1   3 -15 92.4482 15.6165   1
  -1   3 -15 108.331 14.0377   3
  -1  -3 -15 83.5452 13.2842   3
  -1   3 -16 147.598 17.5578   3
  -1   3 -16 164.556 20.7745   1
  -1  -3 -16 112.337 16.1618   3
  -1  -3 -17 40.9776 11.1344   3
   1  -4 -19 4.67344 10.7744   3
   1   4 -18 135.385 19.0442   3
   1  -4 -18 106.000 17.5384   3
   1   4 -17 7.76330 10.8470   3
   1  -4 -17 8.86278 9.54283   3
   1   4 -16 283.845 28.0856   3
   1  -4 -16 217.323 24.3096   3
   1  -4 -15 18.7157 9.23467   3
   1   4 -15 18.5145 8.92550   1
   1  -4 -14 126.575 16.5482   3
   1   4 -14 119.559 15.4701   1
   1  -4 -13 302.274 26.7235   3
   1   4 -13 278.472 25.5145   1
   1  -4 -12 29.5228 8.45238   3
   1   4 -12 30.2220 7.83243   1
   1  -4 -11 552.470 34.1289   3
   1   4 -11 500.343 32.2954   1
   1  -4 -10 266.550 20.8048   7
   1   4 -10 321.192 25.3186   8
  -1   4  10 216.902 20.1510   8
   1  -4 -10 271.735 22.6302   3
   1   4 -10 265.236 21.6291   1
   1  -4 -10 227.585 19.7743   5
   1  -4  -9 821.050 52.3482   7
   1   4  -9 892.672 59.2191   8
  -1   4   9 758.886 53.4546   8
  -1   4   9 761.501 51.9440   2
   1  -4  -9 717.176 53.3701   3
   1   4  -9 719.173 52.1761   1
   1  -4  -9 648.484 51.1317   5
   1  -4  -8 421.689 31.3172   7
   1   4  -8 383.604 37.1782   8
   1   4  -8 403.855 31.1889   1
   1  -4  -8 418.169 31.0016   5
  -1   4   8 449.683 32.0303   2
   1  -4  -8 474.003 33.0693   3
  -1   4   7 62.5132 8.58301   2
   1   4  -7 65.5654 12.8010   8
   1  -4  -7 64.2813 7.57912   7
  -1   4   7 56.9076 8.44026   3
   1   4  -7 62.6202 6.75239   1
   1  -4  -7 65.1829 8.03133   3
   1  -4  -7 67.5197 7.59232   5
  -1   4   6 2244.17 152.627   2
   1   4  -6 2351.75 148.599   1
   1  -4  -6 2325.16 150.938   3
  -1   4   6 2191.35 150.609   3
   1  -4  -6 2189.82 150.314   5
   1  -4  -5 4.80751 3.25027   5
  -1   4   5 12.6955 5.05316   2
  -1   4   4 1418.33 94.8928   2
   1  -4  -4 1306.53 90.9268   5
  -1   4   3 721.980 51.0467   2
  -1   4   3 616.190 44.8347   5
   1  -4  -3 641.351 44.3465   3
   1  -4  -3 663.953 47.5192   5
  -1   4   2 1489.27 99.1390   5
   1  -4  -2 1740.66 105.632   5
   1  -4  -2 1404.96 97.1990   3
   1  -4  -1 1839.25 111.394   3
  -1   4   1 1647.76 110.302   4
  -1  -4   1 1667.19 110.419   4
   1  -4  -1 1673.49 110.238   6
  -1   4   1 1714.30 115.586   5
   1  -4   0 5.19443 1.79808   3
   1  -4   0 3.35399 1.48466   4
   1   4   0 3.64427 1.35689   4
  -1   4  -1 1123.91 82.3364   8
   1  -4   1 1096.86 72.3210   3
   1   4   1 950.358 72.1949   3
  -1   4  -1 1241.85 72.5019   3
   1   4   2 663.311 43.3939   3
  -1   4  -2 586.218 52.1034   8
  -1   4  -2 623.980 43.0489   3
   1   4   3 1343.71 71.0970   5
  -1   4  -3 1194.46 69.8709   3
  -1  -4  -3 843.253 69.3988   3
  -1   4  -3 1150.93 81.4505   8
   1   4   3 954.366 69.4855   3
  -1   4  -4 534.508 35.5983   3
  -1  -4  -4 443.221 35.4436   3
   1   4   4 545.325 35.6686   3
   1  -4   4 529.823 36.5904   1
  -1   4  -4 601.303 47.8266   8
  -1   4  -5 268.068 28.2467   8
   1   4   5 251.374 18.9066   3
  -1  -4  -5 240.734 18.8731   3
  -1   4  -6 2092.77 147.972   8
  -1  -4  -6 2097.25 138.430   3
   1   4   6 2067.22 138.062   3
  -1  -4  -6 2102.42 136.011   7
   1   4   7 0.82816 4.13092   2
   1   4   7 6.02476 3.72820   3
  -1   4  -7 10.5304 8.09338   8
  -1  -4  -7 3.86873 1.69364   7
  -1  -4  -7 3.74800 3.31326   3
  -1   4  -8 867.470 63.1143   8
   1   4   8 863.229 56.6559   3
  -1  -4  -8 808.936 56.4059   3
   1   4   8 744.874 55.9888   2
   1   4   9 361.589 26.0108   2
  -1   4  -9 322.600 29.3991   1
  -1  -4  -9 406.268 28.6494   3
  -1   4 -10 452.202 38.1184   1
  -1  -4 -10 511.398 36.6699   3
  -1   4 -11 300.823 25.3693   1
  -1  -4 -11 309.365 23.5808   3
  -1   4 -12 1.23427 6.77153   1
  -1  -4 -12 2.76992 5.49447   3
  -1   4 -12-1.04141 6.27414   2
  -1   4 -13 293.108 29.3642   1
  -1  -4 -13 366.155 28.5656   3
  -1   4 -14 3.63996 8.65863   3
  -1   4 -14 2.77361 8.88846   1
  -1   4 -15 95.7715 14.2176   3
  -1  -4 -15 77.4267 13.1024   3
  -1   4 -15 69.5926 14.3423   1
  -1   4 -16 118.672 19.3902   1
  -1  -4 -16 164.384 18.6181   3
  -1   4 -16 176.545 19.0970   3
  -1  -4 -17 5.09622 8.73265   3
   1  -5 -18 1.56434 10.4076   3
   1  -5 -17 100.817 17.2802   3
   1   5 -17 147.765 20.7340   3
   1  -5 -16 44.1356 11.8439   3
   1  -5 -15 249.150 25.2995   3
   1  -5 -14 140.606 17.3136   3
   1   5 -14 127.726 14.8813   1
   1  -5 -13 41.1771 10.4748   3
   1   5 -13 41.7415 8.66108   1
   1  -5 -12 454.847 31.3048   3
   1   5 -12 418.511 28.1676   1
   1   5 -11-0.66932 4.62752   1
   1  -5 -11 8.26509 7.00931   3
  -1   5  11-1.58386 5.05341   8
   1   5 -10 303.047 24.5354   1
   1  -5 -10 363.153 25.4574   7
   1   5 -10 345.440 32.0198   8
  -1   5  10 277.187 26.5551   8
  -1   5  10 326.072 25.5537   2
   1  -5 -10 339.348 27.4247   3
   1  -5 -10 305.665 24.7727   5
   1  -5  -9 248.377 19.6409   7
   1   5  -9 244.952 27.1615   8
   1  -5  -9 259.025 21.3162   3
   1  -5  -9 214.556 19.2698   5
  -1   5   9 232.980 20.3382   2
   1   5  -8 122.548 19.3744   8
   1  -5  -8 163.044 13.9103   7
   1  -5  -8 163.011 14.8349   3
   1  -5  -8 132.278 13.4022   5
  -1   5   8 143.593 15.0418   2
   1  -5  -7 1421.17 95.0242   3
  -1   5   7 1445.92 97.3525   2
   1  -5  -7 1336.83 94.5773   5
   1   5  -7 1411.88 102.659   8
  -1   5   6 7.03314 5.23648   2
   1  -5  -6 13.9254 4.84190   5
  -1   5   6 15.7771 4.60604   3
  -1   5   5 1125.58 84.7472   2
   1  -5  -5 1318.88 83.4139   5
  -1   5   5 1136.59 79.6780   3
   1  -5  -4 725.405 47.9115   5
  -1   5   4 642.575 49.3477   2
  -1   5   3 631.204 45.1759   5
   1  -5  -3 597.970 43.6348   3
  -1  -5   2 624.178 40.3265   4
   1  -5  -2 546.653 40.5232   3
  -1   5   2 581.399 43.4496   5
   1  -5  -1 9.40559 1.89028   6
   1   5  -1 8.31618 1.94473   6
   1  -5  -1 9.28089 2.72590   3
  -1   5   1 11.6754 6.25665   5
  -1   5   1 12.5185 1.94521   4
  -1   5   0 2740.22 176.314   3
   1  -5   0 2526.32 176.243   3
  -1   5  -1 1.81762 7.29149   8
  -1  -5  -1 13.0284 2.20175   6
  -1   5  -1 10.2438 2.17880   6
  -1   5  -1 10.1715 2.79696   3
   1  -5   1 12.6422 2.95411   3
  -1   5  -2 917.273 77.3023   8
  -1   5  -2 1020.32 67.1365   3
   1   5   2 1000.71 67.3687   3
  -1   5  -3 1170.55 77.4094   3
  -1  -5  -3 1053.69 77.4508   3
   1   5   3 1142.75 77.4071   3
  -1   5  -3 1214.61 89.9851   8
   1  -5   4 394.959 25.4767   1
  -1  -5  -4 277.315 24.1376   3
  -1   5  -4 403.284 24.7861   3
  -1   5  -4 338.755 35.3341   8
   1   5   4 344.051 24.4301   3
   1   5   4 308.513 22.9130   5
   1   5   5 1387.00 91.5819   3
  -1   5  -5 1451.28 91.6777   3
  -1  -5  -5 1357.93 91.9306   3
  -1   5  -5 1326.43 103.951   8
   1  -5   5 1292.28 92.1535   1
   1   5   6 26.6636 5.56737   3
  -1  -5  -6 16.9411 4.31117   3
  -1   5  -7 1334.93 94.1460   8
   1   5   7 1190.32 81.5051   3
  -1  -5  -7 1156.76 81.9453   3
  -1  -5  -7 1218.93 79.1933   7
  -1   5  -8 143.211 19.9216   8
  -1  -5  -8 121.324 9.25139   7
  -1  -5  -8 151.450 13.0325   3
   1   5   8 98.6528 13.3692   2
   1   5   9 471.871 35.6831   2
  -1   5  -9 496.792 43.4696   8
  -1  -5  -9 485.928 36.1624   3
  -1  -5 -10 383.303 30.7790   3
   1   5  10 392.925 28.3689   2
  -1  -5 -11 9.83808 5.55407   3
  -1   5 -12 162.598 28.3049   2
  -1  -5 -12 532.809 30.5380   3
  -1  -5 -13 67.9631 11.1794   3
  -1  -5 -14 79.1182 12.5031   3
  -1  -5 -15 210.336 22.0024   3
  -1  -5 -16 48.9211 11.9765   3
  -1  -5 -17 67.1368 14.4437   3
   1  -6 -18 20.9991 12.6962   3
   1  -6 -17-1.55119 10.2164   3
   1  -6 -16 43.3458 12.2548   3
   1  -6 -15 28.5527 10.5655   3
   1  -6 -14 25.7185 9.58890   3
   1  -6 -13 477.858 39.5054   3
   1  -6 -12 42.5165 10.3686   3
  -1   6  11 659.304 43.4224   2
  -1   6  11 526.187 45.2100   8
   1  -6 -11 547.636 44.8981   3
  -1   6  10 72.0851 12.9609   8
   1  -6 -10 74.8415 10.9088   5
   1   6 -10 104.338 17.6937   8
  -1   6  10 87.5505 10.7265   2
   1  -6 -10 82.2869 11.5332   3
   1  -6  -9 922.660 64.5815   7
   1  -6  -9 986.710 66.8088   3
   1   6  -9 884.307 73.9692   8
  -1   6   9 874.389 66.7934   2
   1  -6  -9 974.666 66.9019   5
   1  -6  -8 132.716 14.9584   3
  -1   6   8 156.144 17.1948   2
   1   6  -8 191.334 23.4986   8
   1  -6  -8 192.659 18.1593   5
  -1   6   7 133.524 16.5130   2
   1   6  -7 112.492 18.6586   8
   1  -6  -7 136.037 13.7238   3
   1  -6  -6 1428.82 84.7591   5
  -1   6   6 922.338 80.3391   2
  -1   6   5 35.0122 10.1468   2
  -1   6   5 35.9030 5.27523   5
  -1   6   4 495.525 45.0485   2
  -1   6   4 492.996 36.2334   5
   1  -6  -3 547.596 41.0339   3
  -1   6   3 643.140 43.4896   5
   1  -6  -2 91.0705 8.67317   3
  -1   6   2 76.8341 7.02902   4
  -1   6   2 69.6789 10.7748   5
  -1  -6   2 91.2582 7.33280   4
   1  -6  -1 2685.29 175.384   3
   1   6  -1 2637.52 173.508   6
  -1   6   1 2952.80 185.019   5
  -1   6   0 36.1378 11.4515   5
   1  -6   0 24.3924 3.98504   3
   1  -6   1 2619.84 166.149   4
   1   6   1 2521.51 166.322   4
  -1   6  -1 2646.22 180.312   8
   1  -6   1 2938.30 168.910   3
  -1   6  -1 2403.30 166.234   6
  -1   6  -2 8.70422 8.44335   8
  -1   6  -2 2.57405 2.02679   3
   1   6   3 935.953 49.7257   3
  -1   6  -3 984.399 66.3295   8
  -1  -6  -4 193.462 16.4770   3
   1   6   4 210.944 16.4277   3
  -1   6  -4 188.318 26.8946   8
   1   6   4 206.245 16.0845   5
  -1   6  -5 79.3628 16.9392   8
   1  -6   5 63.8713 7.69759   1
  -1  -6  -5 47.9196 7.01631   3
   1   6   5 63.7649 7.32431   3
  -1   6  -6 763.543 65.6083   8
  -1  -6  -6 748.702 52.8460   3
  -1   6  -7 7.99697 4.15865   3
  -1  -6  -7 4.69285 4.29961   3
  -1   6  -7 10.6766 10.9547   8
   1   6   8 190.044 22.1748   2
  -1  -6  -8 194.271 17.9366   3
  -1  -6  -8 203.197 14.5978   7
  -1  -6  -9 544.067 39.9445   3
   1   6   9 504.659 40.6918   2
  -1  -6 -10 196.338 18.5786   3
   1   6  10 194.628 17.7906   2
  -1  -6 -11 496.970 38.7154   3
   1   6  11 497.517 35.8466   2
  -1   6 -12-4.50662 11.0174   2
  -1  -6 -12 6.33701 7.23649   3
  -1  -6 -13 421.461 34.9886   3
  -1  -6 -14-2.45237 9.51446   3
  -1  -6 -15 104.875 15.5527   3
  -1  -6 -16 47.3354 12.0349   3
  -1  -6 -17 15.5100 10.2385   3
   1  -7 -17 98.2164 17.4839   3
   1  -7 -16 36.2035 12.7808   3
   1  -7 -15 214.723 24.0642   3
   1  -7 -14 20.9579 10.5208   3
   1  -7 -13 23.4925 8.98308   3
   1  -7 -12 111.975 14.4699   3
  -1   7  12 95.3219 11.9960   2
  -1   7  11-5.76504 5.79016   2
   1  -7 -11 3.38941 6.55410   3
  -1   7  10 32.2426 8.76774   2
   1  -7 -10 58.5565 9.63286   3
  -1   7  10 38.6830 11.9690   8
  -1   7   9 231.173 22.8910   2
   1  -7  -9 220.366 20.9208   3
   1  -7  -8 1.80336 4.94860   3
  -1   7   8 2.99980 7.19690   2
   1  -7  -7 928.297 64.7954   3
  -1   7   7 887.050 69.7650   2
  -1   7   6 9.16706 8.29357   2
  -1   7   5 1107.03 84.9836   2
  -1   7   5 1085.56 74.7189   5
  -1   7   4 108.311 11.5769   5
   1  -7  -4 89.2458 10.1789   3
  -1   7   3 1134.47 81.5348   5
  -1  -7   3 1249.16 77.8910   4
   1  -7  -3 1062.90 78.4766   3
  -1   7   2 215.853 14.9931   4
  -1   7   2 194.892 20.9645   5
   1  -7  -2 204.355 17.1831   3
   1   7  -2 211.714 15.2349   6
   1  -7  -2 206.427 14.7192   6
  -1   7   1 65.0155 12.9982   5
   1  -7  -1 57.3462 7.06154   3
   1  -7   0 399.186 30.2967   3
  -1   7   0 409.095 30.2857   3
  -1   7  -1 21.8825 10.3147   8
  -1  -7  -1 3.00679 3.50334   3
  -1   7  -1 22.0802 4.65978   3
   1  -7   1 9.26047 3.30695   3
  -1   7  -1 13.9532 13.9394   5
   1   7   2 211.432 15.9828   3
  -1   7  -2 194.096 15.5251   3
  -1  -7  -2 170.511 13.5559   6
  -1   7  -3 898.942 64.1132   3
   1   7   3 1086.79 72.2027   5
  -1   7  -4 241.068 18.0975   3
  -1  -7  -4 204.383 18.1099   3
   1   7   4 208.010 18.3489   5
   1   7   5 1488.40 102.373   5
  -1  -7  -5 1589.99 104.970   3
  -1   7  -5 1514.18 104.121   3
   1  -7   5 1711.38 104.495   1
   1  -7   6 12.7246 4.47235   1
  -1  -7  -6 15.2998 4.84308   3
  -1   7  -6 12.9051 4.77294   3
  -1  -7  -7 1372.53 93.8371   3
  -1  -7  -8 72.5147 9.85089   3
   1   7   9 324.212 30.6877   2
  -1  -7  -9 344.288 23.5333   7
  -1  -7  -9 329.715 27.7928   3
   1   7  10 52.9556 10.3137   2
  -1  -7 -10 89.7151 11.3832   3
   1   7  11 18.8172 6.89745   2
  -1  -7 -11 11.3279 6.98748   3
   1   7  12 55.1115 8.21131   2
  -1  -7 -12 90.4798 12.2457   3
  -1  -7 -13 10.7873 8.31579   3
  -1  -7 -14 49.4687 11.8218   3
  -1  -7 -15 203.447 22.4409   3
  -1  -7 -16 22.3092 10.1783   3
  -1  -7 -17 143.633 19.6842   3
   1  -8 -17 5.17314 12.6754   3
   1  -8 -16 1.64983 11.0856   3
   1  -8 -15 103.248 16.7440   3
   1  -8 -14-4.44377 9.55845   3
   1  -8 -13 386.069 34.1380   3
   1  -8 -12-2.60829 8.04600   3
  -1   8  12 1.00353 6.40372   2
   1  -8 -11 584.107 43.9787   3
  -1   8  11 512.881 43.0121   2
   1  -8 -10 30.5887 8.46440   3
  -1   8  10 26.9867 9.25332   2
   1  -8  -9 795.350 60.0762   3
  -1   8   9 862.495 64.0020   2
   1  -8  -8 14.8048 6.70407   3
  -1   8   8 16.2545 9.66233   2
   1  -8  -7 67.8592 10.1481   3
  -1   8   7 54.8289 13.0110   2
  -1   8   6 129.608 20.4672   2
  -1   8   5 1.53887 4.16226   5
  -1   8   5 10.1002 10.3567   2
   1  -8  -4 41.7321 6.91250   3
  -1   8   4 40.1233 7.99988   5
   1  -8  -3 777.840 52.4993   3
  -1   8   3 670.730 54.8461   5
  -1  -8   3 759.765 49.5937   4
  -1   8   3 714.463 49.4273   4
  -1   8   2 16.4796 7.88109   5
   1   8  -2 21.3303 2.92822   6
   1  -8  -2 27.5571 5.46179   3
   1  -8  -1 1768.66 122.998   3
  -1   8   1 2158.66 136.545   5
   1  -8   0 8.84215 3.65306   3
  -1   8   0 3.06974 10.4267   5
   1  -8   1 1874.00 121.262   3
  -1  -8  -1 1971.02 122.130   3
  -1   8  -2 2.00520 1.49968   6
   1   8   3 1265.39 93.3015   5
   1   8   4 3.58439 4.62221   5
  -1  -8  -4 2.85691 3.86553   3
   1   8   5 15.9236 4.31308   5
  -1  -8  -5 11.2484 4.64067   3
   1  -8   5 9.55678 4.36947   1
  -1  -8  -6 6.21026 5.03305   3
   1  -8   6 9.47114 4.77392   1
  -1  -8  -7 3.30003 4.66203   3
  -1  -8  -8 19.4698 6.51739   3
   1   8   9 446.248 42.2410   2
  -1  -8  -9 487.562 33.1335   7
  -1  -8  -9 464.487 37.3518   3
  -1  -8 -10 42.2619 9.40116   3
   1   8  10 63.7386 12.3871   2
  -1  -8 -10 70.6240 5.70758   7
  -1  -8 -11 424.669 34.2592   3
   1   8  11 398.977 34.1667   2
   1   8  12 5.19298 6.41988   2
  -1  -8 -12 4.76254 8.00631   3
  -1  -8 -13 488.848 40.2992   3
  -1  -8 -14 1.34373 9.29057   3
  -1  -8 -15 81.9148 14.9019   3
  -1  -8 -16 4.41470 9.98783   3
  -1  -8 -17 6.04606 10.2622   3
   1  -9 -16 20.1903 12.7305   3
   1  -9 -15 215.256 25.1794   3
   1  -9 -14 7.86336 10.5788   3
   1  -9 -13 21.0524 10.9514   3
   1  -9 -12-5.65512 9.11912   3
  -1   9  12 3.69597 7.94660   2
   1  -9 -11 11.2179 6.25496   7
   1  -9 -11-1.32644 7.89368   3
  -1   9  11-8.86154 9.42505   2
   1  -9 -10 3.28980 5.79686   7
   1  -9 -10-1.22688 7.02649   3
  -1   9  10 18.8279 10.3149   2
   1  -9  -9 301.298 26.5965   3
  -1   9   9 285.922 30.4879   2
   1  -9  -8 27.7149 7.64180   3
  -1   9   8 17.0129 10.8871   2
   1  -9  -7 919.770 65.7247   3
  -1   9   7 907.064 73.8463   2
  -1   9   6 45.9901 15.9835   2
  -1   9   6 23.4373 6.02565   5
  -1   9   5 1212.65 85.5890   5
  -1   9   5 1297.47 99.8277   2
  -1  -9   4 40.4419 5.32344   4
  -1   9   4 37.5954 5.23914   4
  -1   9   4 42.7649 8.57799   5
   1  -9  -4 34.0670 7.19295   3
   1  -9  -3 908.150 58.3854   3
   1   9  -3 905.459 54.4278   6
  -1   9   3 797.151 61.5371   5
  -1   9   3 735.209 53.7298   4
   1  -9  -2 4.44363 4.35341   3
  -1   9   2-1.86004 6.54918   5
   1  -9  -1 43.7117 7.15107   3
  -1   9   1 60.2500 15.7712   5
   1  -9   0 12.3990 4.97379   3
  -1   9   0 19.5747 13.7533   5
   1  -9   1-0.73528 4.26591   3
  -1  -9  -1 7.13973 4.95213   3
  -1   9  -2 29.4103 21.1416   5
   1   9   2 2.91466 11.6489   5
  -1  -9  -3 964.086 61.1768   6
  -1   9  -3 847.398 61.5315   6
   1   9   4 14.2324 6.06481   5
  -1  -9  -4 12.1284 5.49756   3
  -1  -9  -5 921.129 67.2291   3
   1   9   5 1002.74 66.1484   5
   1  -9   5 930.913 65.3870   1
  -1  -9  -6 0.88198 5.24914   3
   1  -9   6 0.55053 4.63394   1
   1   9   6 2.13942 2.63747   5
  -1  -9  -7 1126.74 79.1799   3
  -1  -9  -8 14.4196 6.33456   3
   1   9   9 473.178 45.3223   2
  -1  -9  -9 481.419 38.0543   3
  -1  -9 -10-1.10269 7.11884   3
  -1  -9 -10 6.14585 3.40364   7
   1   9  10 8.73875 10.4042   2
  -1  -9 -11 29.5152 9.07646   3
   1   9  11 39.8906 11.4124   2
  -1  -9 -12 5.01881 8.18491   3
  -1  -9 -13 13.3155 9.33033   3
  -1  -9 -14 8.45613 9.57721   3
  -1  -9 -15 207.199 23.8711   3
  -1  -9 -16 6.13339 10.1061   3
   1 -10 -15 41.5838 14.8406   3
   1 -10 -14 15.8370 11.5865   3
   1 -10 -13 282.251 28.3461   3
   1 -10 -12 2.83636 8.75548   3
  -1  10  12 7.44851 9.08901   2
  -1  10  11 283.945 31.9793   2
   1 -10 -11 363.887 31.7053   3
   1 -10 -11 368.590 28.2646   7
  -1  10  10 9.89422 9.67578   2
   1 -10 -10-1.26200 7.78807   3
   1 -10  -9 321.181 29.5294   3
  -1  10   9 364.397 36.0741   2
   1 -10  -8-4.43543 7.67194   3
  -1  10   8-4.87223 10.7544   2
  -1  10   7 10.7351 12.8935   2
  -1  10   6 16.3637 5.96529   5
  -1  10   6 21.5712 14.2463   2
  -1  10   5 9.93129 14.2765   2
  -1 -10   5 8.03706 4.26586   4
  -1  10   5 6.68372 3.87875   4
  -1  10   5-2.08733 5.47680   5
   1  10  -4 53.5082 5.93440   6
   1 -10  -4 51.9270 4.69986   6
   1 -10  -4 43.0642 8.49588   3
  -1  10   4 50.8129 5.20699   4
  -1  10   4 52.2533 10.9392   5
   1 -10  -3 481.811 36.0810   3
  -1  10   3 435.810 39.4400   5
   1 -10  -2 34.0763 7.12484   3
  -1  10   2 35.2142 11.5775   5
  -1  10   1 637.530 52.8278   5
   1 -10  -1 485.086 38.6653   3
  -1  10   0 115.585 24.4211   5
   1 -10   0 98.8547 11.6739   3
  -1  10  -1 886.980 84.0685   5
   1  10   2 9.42480 14.7787   5
  -1  10  -2-5.18600 19.5167   5
  -1  10  -3 366.997 62.9509   5
   1  10   3 783.325 56.0368   5
  -1 -10  -4 1.59751 2.67815   6
  -1 -10  -4 5.49042 5.84074   3
   1  10   4 1.25448 6.35739   5
  -1 -10  -5 82.3150 11.2672   3
   1  10   5 87.7073 10.6578   5
  -1 -10  -6 1.92799 5.75173   3
   1  10   6 8.73949 3.94464   5
  -1 -10  -7 5.10568 6.23486   3
  -1 -10  -8 24.8819 8.54481   3
   1  10   9 376.933 40.6211   2
  -1 -10  -9 369.762 31.7377   3
   1  10  10-4.11049 9.85979   2
  -1 -10 -10 1.19949 7.04778   3
  -1 -10 -11 222.041 22.3784   3
   1  10  11 187.782 24.5033   2
  -1 -10 -12 2.65306 8.91445   3
  -1 -10 -13 315.194 30.1518   3
  -1 -10 -14 16.2058 10.4250   3
  -1 -10 -15 102.381 18.0184   3
  -1 -10 -16 40.4736 14.1195   3
   1 -11 -14 18.0809 11.5279   3
   1 -11 -13 20.4415 11.8159   3
   1 -11 -12 62.4841 13.5960   3
  -1  11  12 55.1691 13.9036   2
   1 -11 -11 1.40912 8.49702   3
  -1  11  11 13.9604 10.7852   2
   1 -11 -10 63.5389 12.6063   3
  -1  11  10 60.7629 16.2109   2
  -1  11   9 151.225 25.1614   2
   1 -11  -9 213.274 21.0589   3
  -1  11   8 33.0421 15.9238   2
   1 -11  -8 63.8503 11.4354   3
  -1  11   7 517.209 49.1596   2
  -1 -11   7 422.918 34.2668   4
  -1  11   6 27.7685 18.2009   2
  -1 -11   6 13.2633 4.66370   4
  -1  11   6 9.95684 4.31897   4
  -1  11   6 15.5901 6.33395   5
  -1  11   5 461.325 49.1662   2
   1 -11  -5 375.614 32.9785   3
  -1  11   5 466.605 34.3634   5
  -1  11   5 388.878 27.8447   4
  -1  11   4-4.37014 7.75297   5
   1 -11  -4 2.95200 5.99989   3
   1 -11  -3 639.240 47.4240   3
  -1  11   3 619.517 51.8823   5
  -1  11   2 6.73033 8.70414   5
   1 -11  -2 0.93918 5.22997   3
  -1  11   1 65.6918 17.6640   5
   1 -11  -1 41.7127 8.52214   3
   1 -11   0 90.3193 11.7054   3
  -1  11   0 87.0455 22.3420   5
  -1  11  -1-4.47825 16.3236   5
   1  11   1 21.1159 18.6414   5
   1  11   2 539.515 49.0247   5
  -1  11  -2 271.217 48.3810   5
   1  11   3 413.860 34.4400   5
  -1  11  -3 110.285 34.9603   5
  -1  11  -4 26.8482 26.1431   5
   1  11   4 37.7411 9.59215   5
   1  11   5 450.478 34.4358   5
  -1 -11  -5 417.943 35.0295   3
   1  11   6 3.82021 4.08337   5
  -1 -11  -6 4.31717 6.81651   3
  -1 -11  -7 516.188 41.0534   3
  -1 -11  -8 17.5423 9.00997   3
  -1 -11  -9 232.976 23.5402   3
   1  11   9 221.240 33.7021   2
  -1 -11 -10 61.3310 12.5069   3
   1  11  10 31.0379 15.5667   2
  -1 -11 -11 15.2047 9.04460   3
   1  11  11 8.24703 10.6540   2
  -1 -11 -12 20.3807 10.7775   3
  -1 -11 -13 16.8244 10.6298   3
  -1 -11 -14 22.4089 12.9475   3
  -1 -11 -15 56.6278 15.4664   3
   1 -12 -13 125.448 19.1324   3
   1 -12 -12 7.74341 10.9150   3
   1 -12 -11 112.035 16.7905   3
  -1  12  11 126.136 21.5761   2
   1 -12 -10 9.73343 9.52934   3
  -1  12  10-2.53562 11.9323   2
   1 -12  -9 256.975 25.1180   3
  -1  12   9 228.977 33.0234   2
  -1  12   8 9.21621 14.0239   2
   1 -12  -8 46.2862 10.5522   3
  -1  12   7 23.4591 16.4531   2
  -1  12   6 94.5628 13.0989   5
  -1  12   6 173.536 30.4485   2
   1 -12  -5 5.58264 6.22643   3
  -1  12   5 5.11541 7.22926   5
  -1  12   5 12.5286 16.2047   2
  -1  12   4 118.578 16.6331   5
   1 -12  -4 95.1523 13.5464   3
   1 -12  -3 249.481 22.6990   3
  -1  12   3 206.747 25.6329   5
  -1  12   2 74.4779 16.9438   5
   1 -12  -2 58.6457 10.4176   3
  -1  12   1 694.849 61.0448   5
   1 -12  -1 625.521 48.5822   3
   1  12   0 5.20830 21.3643   5
  -1  12   0-11.2685 15.0003   5
   1  12   1 573.299 58.2948   5
  -1  12  -1 365.944 51.1293   5
  -1  12  -2 198.403 38.3955   5
   1  12   2 186.518 28.8970   5
  -1  12  -3 57.2641 32.2484   5
   1  12   3 341.632 30.6764   5
  -1  12  -4 34.6371 32.6314   5
   1  12   4 119.143 16.1035   5
  -1  12  -5-7.50416 27.3698   5
   1  12   5 18.7113 7.01701   5
  -1 -12  -5 21.9919 8.30715   3
   1  12   6 31.8343 6.98158   5
  -1 -12  -6 57.2645 11.6768   3
  -1 -12  -7 20.9930 8.95092   3
   1  12   8 17.8349 21.6806   2
  -1 -12  -8 51.3068 11.0401   3
   1  12   9 110.758 28.3889   2
  -1 -12  -9 174.291 19.4621   3
  -1 -12 -10 11.0989 9.95698   3
   1  12  10 5.29415 12.4653   2
  -1 -12 -11 190.583 22.1322   3
   1  12  11 160.735 25.6076   2
  -1 -12 -12 10.7554 10.5468   3
  -1 -12 -13 140.176 20.7567   3
  -1  13  11 37.5224 15.6648   2
   1 -13 -11 11.1147 11.2537   3
  -1  13  10 72.6937 19.4618   2
   1 -13 -10 65.1359 13.7681   3
  -1  13   9 53.0151 21.7909   2
   1 -13  -9 95.3939 16.0732   3
  -1  13   8 44.0130 20.7987   2
   1 -13  -8 97.6203 14.8610   3
  -1  13   7 171.689 30.9997   2
  -1  13   6 8.13498 17.9562   2
  -1  13   6 7.56711 6.98995   5
   1 -13  -5 82.0479 13.6937   3
  -1  13   5 74.7422 29.2602   2
  -1  13   5 75.5824 13.8829   5
   1 -13  -4-1.19204 7.68951   3
  -1  13   4 1.73109 9.63601   5
  -1  13   4-13.9921 19.1275   2
  -1  13   3 173.500 22.8385   5
   1 -13  -3 169.942 18.7158   3
  -1  13   2 90.6837 19.0132   5
   1 -13  -2 82.7765 13.2361   3
   1  13  -1 18.4055 24.5435   5
  -1  13   1 27.6906 14.5649   5
  -1  13   0 211.471 33.7958   5
   1  13   0 126.669 34.3508   5
  -1  13  -1-13.6774 19.2009   5
   1  13   1-12.3636 19.4047   5
  -1  13  -2 21.2486 22.5974   5
   1  13   2 77.5273 20.8973   5
  -1  13  -3 67.4190 30.4369   5
   1  13   3 88.3865 18.3162   5
   1  13   4 80.2507 14.4208   5
  -1  13  -4 28.3229 32.2861   5
   1  13   5 72.9103 12.3150   5
  -1 -13  -5 78.5150 13.4047   3
  -1 -13  -6 3.89788 7.82933   3
  -1  13  -6-8.13559 28.6401   5
  -1 -13  -7 171.185 19.0100   3
  -1  13  -7-8.50706 33.1188   5
  -1 -13  -8 29.3666 11.1621   3
  -1  13  -8 17.7009 31.1833   5
   1  13   8-3.97651 18.3744   2
   1  13   9 105.558 27.2395   2
  -1 -13  -9 129.347 17.9563   3
  -1 -13 -10 65.1395 14.4502   3
   1  13  10 46.7739 19.3617   2
  -1 -13 -11 18.9317 11.2660   3
  -1  13 -11 9.52952 33.5666   5
  -1 -13 -12 75.6980 16.2323   3
   1 -14 -10 12.6990 11.0408   3
  -1  14  10 33.5114 17.2397   2
   1 -14  -9 30.2781 11.8781   3
  -1  14   9 20.3154 18.9291   2
   1 -14  -8 58.3378 13.0440   3
  -1  14   8 92.2414 24.9029   2
  -1  14   7-3.93065 17.7373   2
  -1  14   6 82.0572 27.4663   2
  -1  14   5 11.5562 9.14737   5
  -1  14   5 9.80252 20.6358   2
   1 -14  -5 12.0316 9.60782   3
  -1  14   4 75.9805 15.3951   5
  -1  14   4 82.6410 31.5025   2
   1 -14  -4 75.6000 13.9338   3
   1 -14  -3 85.4932 13.6060   3
  -1  14   3 108.973 18.8300   5
   1 -14  -2 73.1044 13.2989   3
   1  14  -2 69.6019 34.3097   5
  -1  14   2 59.2207 17.5189   5
   1  14  -1 61.4443 34.2939   5
  -1  14   1 34.3960 16.3113   5
   1  14   0-5.08758 19.7374   5
  -1  14   0-3.76856 14.1849   5
   1  14   1 98.8085 28.0306   5
  -1  14  -1 95.0483 28.9294   5
   1  14   2 51.4982 17.4429   5
  -1  14  -2 58.3832 28.0148   5
  -1  14  -3 18.0355 25.4870   5
   1  14   3 59.7872 15.7626   5
  -1  14  -4 47.9691 31.9197   5
   1  14   4 76.7243 15.5119   5
  -1 -14  -5 9.67000 9.56145   3
  -1  14  -5-7.50129 26.4105   5
  -1 -14  -6 210.167 22.5666   3
  -1  14  -6 48.8411 48.1175   5
  -1  14  -7-17.2192 36.2255   5
  -1 -14  -7 1.45538 9.68322   3
   1  14   8 44.1734 27.0867   2
  -1  14  -8-8.90627 33.6402   5
  -1 -14  -8 55.6175 13.4261   3
   1  14   9 29.6338 21.2129   2
  -1  14  -9 9.18653 33.4831   5
  -1 -14  -9 7.83858 10.6641   3
  -1 -14 -10 22.8400 11.7272   3
   1  14  10 3.18921 15.6194   2
  -1  14 -11 9.16679 20.6891   2
  -1  15  10 68.4603 22.5529   2
  -1  15   9-3.63484 19.0420   2
   1 -15  -8 78.7407 15.6011   3
  -1  15   8 67.6726 25.3188   2
  -1  15   7 25.3336 22.8783   2
  -1  15   6 13.7589 23.2536   2
  -1  15   5 59.6921 29.9719   2
   1 -15  -5 76.0288 14.4852   3
   1 -15  -4 36.7196 13.1090   3
   1  15  -4 16.5628 34.0746   5
  -1  15   4 33.2745 28.2336   2
  -1  15   4 59.6208 15.3897   5
   1 -15  -3 95.6208 14.7956   3
   1  15  -3 15.2478 33.2244   5
  -1  15   3 62.2448 16.2484   5
  -1  15   3 78.9783 30.8711   2
   1  15  -2 68.9399 37.4837   5
  -1  15   2 62.6850 18.0193   5
  -1  15   2 62.3826 29.5092   2
   1  15  -1 29.2822 24.6661   5
  -1  15   1 12.6389 15.1987   5
  -1  15   0 79.1039 24.5705   5
   1  15   0 128.941 33.2933   5
   1  15   1-7.62052 17.5637   5
  -1  15  -1 4.46519 19.7060   5
   1  15   2 66.5489 19.4484   5
  -1  15  -2 145.966 34.4181   5
  -1  15  -3 23.7703 25.0923   5
   1  15   3 35.2162 13.4259   5
  -1  15  -4 19.6529 26.1797   5
  -1  15  -5-7.20235 28.7528   5
  -1  15  -6-7.78391 27.4062   5
  -1 -15  -7 56.6699 13.9566   3
  -1  15  -7 8.16401 31.8010   5
   1  15   7 34.4604 25.9492   2
  -1 -15  -8 17.8135 11.8239   3
   1  15   8 4.62147 21.7522   2
  -1  15  -8-8.79476 27.4527   5
   1  15   9 15.5022 19.9963   2
  -1  15 -10 4.91657 21.1999   2
  -1  16   8 33.6216 25.7166   2
  -1  16   7 4.49972 21.1695   2
  -1  16   6 101.108 31.0398   2
   1  16  -6 27.5906 34.8928   5
  -1  16   5 20.6828 24.3239   2
   1 -16  -5-3.10559 11.1262   3
   1  16  -5 8.70516 35.6999   5
  -1  16   4 44.7073 27.9808   2
   1  16  -4 49.0493 37.0061   5
  -1  16   3 30.8559 29.0319   2
  -1  16   3 2.31184 13.2338   5
   1  16  -3-7.37093 29.4235   5
  -1  16   2-6.15899 26.5647   2
  -1  16   2 18.2988 13.9329   5
   1  16  -2 6.31862 26.5964   5
  -1  16   1 6.08941 23.6232   2
  -1  16   1 6.31051 14.2392   5
   1  16  -1-5.43651 25.5757   5
   1  16   0 4.49896 21.9957   5
  -1  16   0 3.74304 17.9585   5
  -1  16  -1 17.2714 19.9108   5
   1  16   1 3.57407 17.1567   5
  -1  16  -2 39.9849 24.1156   5
  -1  16  -3 17.0129 23.8860   5
  -1  16  -4 62.9281 32.1395   5
  -1  16  -5 13.7816 29.0070   5
   1  16   6 16.4918 33.9156   2
  -1  16  -6-7.34616 28.4974   5
   1  16   7-16.2659 27.4906   2
   1  16   8 46.2792 27.3543   2
   1  16   9-12.1592 20.9007   2
   1  17  -4-7.58516 31.9186   5
   1  17  -3-6.77237 29.2020   5
   1  17  -2 23.7423 27.4005   5
   1  17  -1-5.06187 23.8243   5
  -1  17   1-15.4219 16.4336   5
   1  17   0 99.7299 29.0516   5
  -1  17   0 83.9945 24.2643   5
  -1  17  -1 4.23654 18.6974   5
  -1  17  -2 14.3318 24.2219   5
  -1  17  -3-5.37656 22.0520   5
  -1  17  -4 18.1302 23.4724   5
   1  18  -2 5.34276 25.6333   5
  -1  18  -1 8.15145 20.6565   5
   2   0 -19-3.70847 12.9400   3
   2   0 -18 147.440 21.1668   3
   2   0 -17-3.10735 9.58742   3
   2   0 -16 26.7795 10.9787   3
   2   0 -15 7.21310 8.70316   3
   2   0 -14 214.288 22.7027   3
   2   0 -13-3.99403 7.30823   3
   2   0 -12 1161.65 83.6654   3
   2   0 -11-4.98840 6.94162   3
   2   0 -11 3.49188 5.19475   2
   2   0 -10 1797.07 114.784   2
   2   0 -10 1551.12 116.604   3
   2   0  -9-0.71410 3.74073   2
  -2   0   9 1.70050 4.73254   7
  -2   0   8 1135.77 80.0723   7
   2   0  -8 1182.77 79.4653   2
   2   0  -7 2.35117 3.12855   2
  -2   0   7-1.41378 3.58169   7
   2   0  -6 345.757 27.3475   2
  -2   0   6 380.564 28.1806   7
   2   0  -6 386.062 28.2405   7
   2   0  -5 1.98276 1.62351   8
  -2   0   5 0.56599 2.76971   7
   2   0  -5 2.29375 2.47539   7
   2   0  -5 2.53003 2.52212   2
  -2   0   4 375.397 26.6159   7
   2   0  -4 337.616 26.6822   2
  -2   0   3 1.30253 2.34808   7
  -2   0   2 1377.94 92.2254   4
  -2   0   1 0.74681 1.64850   4
  -2   0   0 6725.75 435.970   6
  -2   0  -1 0.36643 1.65355   5
   2   0   2 3440.15 214.929   2
  -2   0  -2 3175.40 217.066   1
  -2   0  -2 3124.27 215.815   5
   2   0   2 3404.18 216.962   5
   2   0   3-0.90030 1.91495   2
   2   0   3 3.23907 5.07906   5
  -2   0  -3 2.39730 2.52169   5
  -2   0  -4 2571.90 145.935   5
  -2   0  -4 2105.23 139.010   3
   2   0   4 2175.63 140.591   2
  -2   0  -5-1.37521 5.48942   5
  -2   0  -5 0.15551 1.24189   3
   2   0   5 1.66212 2.12145   2
  -2   0  -5 2.99869 4.97637   1
  -2   0  -6 6.62032 5.55535   1
  -2   0  -6 15.9552 2.80263   3
  -2   0  -6 1.86372 7.06266   5
  -2   0  -7-0.71919 2.34409   3
   2   0   7 1.81446 3.72065   8
  -2   0  -7-2.43981 4.73228   1
  -2   0  -7 2.30714 8.40689   5
  -2   0  -8 193.746 21.7021   1
   2   0   8 224.458 20.9580   8
  -2   0  -8 248.789 18.0606   3
   2   0   8 229.464 18.1474   7
  -2   0  -9-2.79180 3.78840   3
  -2   0  -9 1.45127 6.82716   1
   2   0   9 1.01107 3.29547   7
   2   0   9 1.11199 4.67892   8
  -2   0 -10 1026.17 88.8930   1
   2   0  10 1190.99 83.3199   7
   2   0  10 1183.73 87.6435   8
   2   0  11 2.60845 6.01249   8
  -2   0 -11 8.38642 8.64412   1
   2   0  11 1.14368 4.06359   7
  -2   0 -11 0.65105 4.28934   3
  -2   0 -12 1388.48 68.7990   1
  -2   0 -12 1401.21 57.4308   3
   2   0  12 1226.33 62.2348   8
  -2   0 -13-8.49779 20.7720   5
  -2   0 -13 1.47321 4.95044   3
   2   0  13 3.58251 6.55211   8
  -2   0 -13 5.75929 10.2179   1
  -2   0 -14 167.840 22.6690   1
   2   0  14 144.048 16.6473   8
  -2   0 -14 205.098 16.3577   3
  -2   0 -15 8.58797 11.7784   1
  -2   0 -15-0.84355 6.14767   3
  -2   0 -16 93.8190 19.6331   1
  -2   0 -17 2.30365 13.8786   1
  -2   0 -18-9.32252 12.7998   1
  -2   0 -19-4.74018 13.9288   1
   2  -1 -19 7.82987 10.9328   3
   2   1 -19 3.28129 11.5571   3
   2  -1 -18 279.532 29.9750   3
   2   1 -18 267.452 28.8277   3
   2  -1 -17-1.77658 11.7054   3
   2   1 -17 12.3779 10.2992   3
   2  -1 -16 331.907 30.7670   3
   2   1 -16 308.408 30.4191   3
   2   1 -15 4.45178 8.38153   3
   2  -1 -15 4.31061 8.00267   3
   2   1 -14 98.4713 15.3911   3
   2  -1 -14 102.135 14.5800   3
   2   1 -13-1.44527 7.57081   3
   2  -1 -13 1.28860 6.41521   3
   2  -1 -12 66.6826 11.3509   3
   2   1 -12 71.0112 12.3856   3
   2   1 -11 50.7696 7.52599   2
   2  -1 -11 44.2878 8.63224   3
   2  -1 -10 187.434 19.6751   3
   2   1 -10 237.141 18.2147   2
   2  -1 -10 179.880 19.2281   2
   2  -1  -9 120.119 13.6691   3
  -2  -1   9 120.868 13.6798   7
   2   1  -9 124.812 12.2282   2
   2  -1  -9 111.891 13.1675   2
   2  -1  -8 773.888 58.7322   3
  -2  -1   8 830.705 58.6384   7
   2  -1  -8 854.945 58.8009   2
   2  -1  -7 5.37918 3.41971   7
  -2  -1   7 3.80850 4.25009   7
   2  -1  -7 3.36435 4.34446   3
   2  -1  -7 5.39951 4.11607   2
   2  -1  -6 4834.45 324.088   7
  -2  -1   6 5095.67 324.723   7
   2  -1  -6 4979.52 324.678   2
   2  -1  -5 28.3401 5.31049   2
   2   1  -5 27.7416 5.28371   7
   2  -1  -5 22.4896 4.32922   7
  -2  -1   5 21.3613 4.85778   7
   2  -1  -4 3626.43 220.087   2
   2  -1  -4 3267.67 219.908   8
   2  -1  -4 3258.77 219.562   3
   2  -1  -4 3392.63 219.175   7
  -2  -1   4 3220.53 219.263   7
   2  -1  -3 1.83580 2.44415   8
   2  -1  -3-0.55219 2.70091   2
  -2   1   3 2.83584 2.55594   2
  -2  -1   3 1.84441 2.29721   7
  -2  -1   2 3250.04 225.448   7
  -2   1   2 3670.77 226.377   4
   2  -1  -2 3208.86 226.939   8
   2  -1  -2 3242.42 226.219   2
   2  -1  -2 3635.69 225.501   3
   2  -1  -2 3687.88 225.802   5
  -2   1   1 210.466 17.3500   5
   2   1  -1 215.583 17.0301   7
   2   1  -1 221.064 17.1845   4
  -2   1   1 225.825 17.2673   4
   2  -1  -1 244.648 18.8418   8
  -2   1   1 245.558 18.0187   2
   2  -1  -1 250.300 16.8296   3
   2  -1  -1 232.799 17.2634   6
  -2  -1   0 121.890 10.5730   6
   2   1   0 136.074 10.5495   4
   2   1   0 128.068 10.1768   7
  -2   1   0 130.627 11.3433   5
   2  -1   0 129.771 10.8221   6
  -2   1   0 121.734 11.0373   2
   2  -1   0 125.179 9.36420   3
   2   1   1 18.3311 2.87141   5
  -2   1  -1 11.9081 3.20306   5
   2  -1   1 15.2929 1.67541   3
   2   1   1 14.6397 2.45808   7
  -2   1  -1 13.4465 3.28925   2
  -2  -1  -1 13.1349 3.65848   1
  -2   1  -2 1653.71 115.251   5
  -2  -1  -2 1676.63 115.132   1
   2  -1   2 1618.16 114.229   1
   2  -1   2 1662.10 113.764   2
  -2   1  -2 1727.90 113.620   2
  -2  -1  -2 1664.32 112.211   5
   2   1   2 1658.53 112.751   5
   2   1   2 1791.33 111.121   3
   2   1   3 21.0863 2.03847   3
   2  -1   3 19.2045 4.09480   2
  -2   1  -3 20.4955 3.48036   2
  -2  -1  -3 15.2595 2.96592   5
  -2   1  -3 5.36232 4.44068   5
   2   1   3 24.0373 4.57083   5
  -2  -1  -3 17.6197 2.04341   3
   2  -1   3 16.9270 4.77273   1
  -2  -1  -3 16.0123 4.67114   1
  -2   1  -4 2772.93 209.960   1
  -2  -1  -4 3116.23 207.787   5
  -2   1  -4 3177.96 207.756   2
  -2  -1  -4 3200.22 205.865   3
   2   1   4 3166.15 205.906   3
   2  -1   4 3400.27 211.283   8
  -2   1  -5 4.00342 2.27758   2
   2   1   5 3.18839 1.54754   2
  -2   1  -5 2.09021 7.61824   5
  -2  -1  -5 1.32628 3.24631   5
   2   1   5 1.20262 1.78981   3
  -2   1  -5 2.72243 1.63347   3
  -2  -1  -5 2.50889 1.60221   3
   2  -1   5 4.86763 3.88962   8
  -2   1  -5 1.87590 4.14252   1
   2  -1   6 3959.83 264.153   8
  -2   1  -6 4102.78 258.788   2
  -2   1  -6 3587.60 263.685   1
  -2  -1  -6 3848.39 264.581   5
   2   1   6 3994.76 258.139   7
  -2   1  -6 4068.37 258.768   3
  -2  -1  -6 3935.89 258.405   3
   2  -1   7 4.72413 5.77390   8
  -2   1  -7 0.35556 2.24444   3
  -2  -1  -7 2.91063 6.70788   5
  -2  -1  -7 0.31652 2.08500   3
   2   1   7 0.48355 1.79161   7
  -2   1  -7 1.18573 5.68852   1
   2  -1   8 1074.95 76.2936   8
  -2   1  -8 1071.17 76.3704   1
   2   1   8 1071.18 69.3616   7
  -2   1  -8 1125.71 70.4562   3
  -2  -1  -8 1145.35 70.3389   3
   2  -1   9 26.3853 8.46144   8
  -2   1  -9 33.7658 5.20614   3
  -2  -1  -9 15.7648 11.5547   5
  -2  -1  -9 27.4670 4.90238   3
   2   1   9 30.5017 4.30683   7
  -2   1  -9 15.5535 7.85583   1
   2  -1  10 962.385 71.9354   8
   2   1  10 1030.46 69.9704   8
  -2   1 -10 1058.52 73.6659   1
   2   1  10 1042.05 64.9886   7
   2  -1  10 1093.39 67.8700   7
  -2  -1 -10 1079.17 66.5110   3
  -2   1 -10 1012.93 66.5162   3
  -2  -1 -11 41.1740 6.69006   3
   2   1  11 34.3537 8.71119   8
  -2   1 -11 45.2271 6.97828   3
   2  -1  11 45.8039 7.63217   7
   2   1  11 40.9902 5.64816   7
  -2   1 -11 32.5975 10.5891   1
  -2  -1 -12 14.3829 5.63051   3
  -2   1 -12 12.9886 5.31177   3
  -2  -1 -12 3.09011 13.6569   5
   2   1  12 11.8747 6.92759   8
  -2   1 -12 5.19007 8.17272   1
  -2  -1 -13 0.75078 5.09439   3
  -2  -1 -13 3.13218 13.8223   5
  -2   1 -13 0.88128 5.86353   3
   2   1  13 3.52084 5.94679   8
  -2  -1 -13 2.01242 8.67688   1
  -2   1 -13-1.83168 9.43937   1
   2   1  14 28.2435 9.07575   8
  -2   1 -14 15.8858 24.9722   5
  -2   1 -14 34.2331 8.36014   3
  -2  -1 -14 29.3411 7.60245   3
  -2  -1 -14 10.6211 11.6155   1
  -2   1 -14 26.8965 12.1188   1
  -2   1 -15 5.31090 21.1995   5
  -2  -1 -15-1.75135 6.38288   3
  -2   1 -15 4.17992 6.72125   3
  -2  -1 -15 6.74243 11.1896   1
  -2   1 -15 6.00725 10.9859   1
  -2  -1 -16 260.214 23.5607   3
  -2   1 -16 255.168 29.9319   1
  -2  -1 -16 276.139 32.7486   1
  -2  -1 -17-2.46627 13.1269   1
  -2   1 -17 6.37862 11.6654   1
  -2  -1 -18 278.392 33.1543   1
  -2   1 -18 227.902 30.5239   1
  -2  -1 -19 2.56139 14.0526   1
   2   2 -19 4.71540 11.7536   3
   2  -2 -19 14.1910 11.6026   3
   2   2 -18 44.3578 13.2462   3
   2  -2 -18 47.8975 12.9358   3
   2   2 -17 32.9334 12.4970   3
   2  -2 -17 27.8632 11.5397   3
   2   2 -16 25.2551 11.4328   3
   2  -2 -16 26.7680 12.2054   3
   2   2 -15 84.1177 15.6071   3
   2  -2 -15 116.978 16.9046   3
   2   2 -14 98.2396 16.9490   3
   2  -2 -14 162.177 18.2020   3
   2  -2 -13 21.9062 8.25430   3
   2  -2 -12 884.978 65.1805   3
   2  -2 -11 1.10369 5.19685   3
   2   2 -11 5.54246 4.79518   2
   2  -2 -10 1012.41 67.8493   3
   2  -2 -10 1103.41 66.9372   7
   2  -2  -9 46.6261 11.5900   2
   2  -2  -9 78.8800 10.1506   3
   2   2  -8 552.387 37.5149   8
  -2  -2   8 564.362 39.8092   7
   2  -2  -8 516.085 38.4962   3
   2  -2  -7 187.889 19.5514   2
  -2  -2   7 251.187 19.8313   7
   2  -2  -7 209.648 17.8611   7
   2  -2  -7 189.501 17.9305   3
  -2   2   6 212.799 16.6465   2
   2  -2  -6 187.309 18.5658   2
  -2  -2   6 182.748 17.4987   7
   2  -2  -6 195.975 16.6931   7
  -2   2   5 332.939 25.2536   2
   2  -2  -5 367.506 27.8468   2
  -2   2   5 295.285 24.0177   8
   2  -2  -5 339.646 25.3883   7
  -2  -2   5 374.009 26.4990   7
   2  -2  -4 170.229 13.8584   5
   2  -2  -4 151.608 15.4272   2
  -2   2   4 162.414 14.2282   2
  -2   2   4 159.986 14.1595   8
   2  -2  -4 154.490 13.5280   3
  -2  -2   4 174.160 14.6071   7
   2  -2  -3 1180.77 82.9293   5
   2  -2  -3 1182.70 86.7588   8
  -2   2   3 1332.10 84.7635   8
   2  -2  -3 1332.93 85.6937   2
  -2   2   3 1334.32 84.3073   2
   2  -2  -3 1285.77 82.5543   3
  -2  -2   3 1076.03 83.0250   7
   2  -2  -2 287.158 25.3606   8
  -2   2   2 322.285 23.9880   8
   2  -2  -2 328.606 24.1004   2
  -2  -2   2 265.386 21.6930   4
  -2   2   2 286.087 21.5943   4
   2  -2  -2 289.375 20.7211   3
   2  -2  -2 261.889 21.7935   5
   2   2  -1 15.2247 3.09053   1
   2   2  -1 19.2573 3.42863   7
   2   2  -1 21.7363 3.54067   6
   2  -2  -1 16.1555 3.01447   6
   2  -2  -1 13.6783 3.72747   5
   2  -2  -1 20.9852 2.95031   3
  -2   2   1 19.5902 3.19584   4
   2  -2  -1 17.0960 3.20791   4
   2   2  -1 10.7951 2.88949   4
   2  -2  -1 23.8999 6.15886   8
  -2   2   1 19.7362 4.63390   2
  -2   2   0 3308.70 231.152   6
  -2  -2   0 3727.17 231.500   6
   2   2   0 3394.39 231.511   6
  -2   2   0 3387.20 232.961   5
   2  -2   0 3607.14 231.572   6
  -2  -2   0 3654.32 232.079   1
   2   2   0 3741.46 231.949   1
   2  -2   0 3515.99 231.111   4
   2   2   0 3691.68 231.169   4
  -2  -2   0 3448.93 230.989   7
   2   2   0 3195.15 231.116   7
  -2   2   0 3776.25 234.123   2
   2  -2   0 3801.80 237.141   8
   2  -2   0 3436.39 229.923   3
  -2   2   0 3838.43 230.249   3
   2   2   1 0.60854 1.41085   3
  -2  -2  -1 1.64216 1.59902   7
   2   2   1 3.99579 1.97926   7
  -2  -2  -1 4.84556 3.22729   1
   2  -2   1 3.70110 1.05899   3
  -2   2  -1 1.34631 1.07366   3
  -2   2  -1 3.99553 3.10368   5
  -2   2  -1 1.52699 3.05146   2
  -2   2  -1 6.90938 4.64583   8
  -2  -2  -2 546.443 34.5752   7
  -2   2  -2 522.877 34.1339   3
   2   2   2 504.554 34.9202   5
  -2   2  -2 516.363 40.7074   5
  -2   2  -2 537.012 38.8342   2
  -2  -2  -2 524.559 34.9382   3
   2  -2   2 506.885 34.1222   3
   2   2   2 488.949 34.5558   3
   2  -2   2 550.028 39.3882   2
  -2   2  -2 536.341 40.2698   8
   2  -2   3 17.7610 4.55533   1
   2   2   3 13.9559 2.21375   3
  -2  -2  -3 12.3549 2.13774   3
   2   2   3 11.8585 2.58586   5
  -2   2  -3 9.86593 6.97826   5
  -2   2  -3 13.7662 4.53483   2
  -2   2  -3 15.9532 1.73020   3
  -2  -2  -4 1484.21 100.248   5
  -2   2  -4 1593.37 104.947   2
   2   2   4 1462.15 100.352   3
  -2   2  -4 1635.20 99.9608   3
  -2  -2  -4 1477.69 100.461   3
   2  -2   4 1529.55 104.058   1
   2  -2   4 1471.98 107.615   8
  -2   2  -5 564.089 40.3007   1
  -2  -2  -5 520.485 35.7946   5
  -2   2  -5 517.997 39.2721   2
   2   2   5 549.672 35.8565   3
  -2  -2  -5 504.748 35.7803   3
   2  -2   5 538.210 42.9898   8
  -2   2  -6 279.936 25.6183   1
  -2  -2  -6 305.575 21.9924   5
  -2   2  -6 282.787 23.9918   2
  -2  -2  -6 314.864 21.6520   3
   2   2   6 301.131 21.6458   3
   2  -2   6 288.930 27.8802   8
  -2   2  -7 724.453 54.5064   1
  -2  -2  -7 750.013 51.2593   5
  -2   2  -7 654.001 51.0636   2
  -2  -2  -7 770.211 49.7180   3
   2  -2   7 729.091 57.1582   8
  -2  -2  -8 121.478 12.6521   5
  -2   2  -8 101.461 13.6845   1
  -2  -2  -8 107.935 10.0386   3
  -2   2  -8 116.573 10.6217   2
   2  -2   8 106.666 15.8759   8
  -2   2  -9 246.562 17.8294   2
  -2   2  -9 220.190 23.1057   1
  -2  -2  -9 260.568 19.4373   3
  -2  -2  -9 225.768 22.7280   5
  -2   2 -10 650.514 50.4173   1
  -2  -2 -10 709.469 45.2210   3
  -2   2 -10 622.749 45.4563   3
  -2   2 -11 4.85496 4.49852   3
  -2  -2 -11 6.34633 8.05244   5
  -2   2 -11 12.0971 8.18636   1
   2  -2  11 8.14984 6.27850   7
  -2  -2 -11 8.42296 4.70621   3
  -2   2 -12 747.671 56.6091   1
  -2  -2 -12 831.138 51.3367   3
  -2   2 -12 730.255 50.8288   3
   2   2  12 839.542 53.7374   8
  -2  -2 -13 1.75379 9.90127   5
  -2   2 -13-0.79034 5.26007   3
   2   2  13-4.38558 6.52568   8
  -2   2 -13-5.08467 8.87969   1
  -2  -2 -13-1.58912 5.34068   3
  -2   2 -14 397.290 36.1458   1
  -2  -2 -14 397.086 30.5025   3
  -2   2 -14 366.426 30.0777   3
   2   2  14 353.959 30.9869   8
  -2  -2 -15 40.4090 16.0164   1
  -2   2 -15 13.0300 11.0032   1
  -2   2 -15 20.9389 8.73267   3
  -2   2 -15 6.09545 25.0266   5
  -2  -2 -15 16.3610 7.25594   3
  -2   2 -16 203.930 25.1497   1
  -2  -2 -16 226.781 29.4375   1
  -2  -2 -16 192.530 19.5463   3
  -2   2 -17 36.0589 14.8598   1
  -2  -2 -17 26.0958 16.2273   1
  -2  -2 -18 16.2622 15.3359   1
   2   3 -19 17.4619 12.3533   3
   2  -3 -19 12.7464 11.3581   3
   2   3 -18 176.726 22.5646   3
   2  -3 -18 152.978 21.3322   3
   2   3 -17 1.63906 10.3488   3
   2  -3 -17 7.62766 10.5512   3
   2  -3 -16 285.555 28.8619   3
   2   3 -16 303.943 30.5186   3
   2  -3 -15 17.2653 9.55819   3
   2   3 -15 25.6300 10.0886   1
   2   3 -15 15.0545 10.9752   3
   2  -3 -14 204.700 22.5800   3
   2  -3 -13 175.297 20.8150   3
   2  -3 -12 137.163 17.2117   3
   2  -3 -11 200.773 19.2988   7
   2  -3 -11 239.156 22.1940   3
   2   3 -10 383.285 28.0726   8
   2  -3 -10 344.272 30.2198   3
   2   3  -9 558.658 42.8804   8
   2  -3  -9 569.059 42.8447   3
   2   3  -8 867.372 53.4708   8
   2  -3  -8 929.960 51.9530   3
   2  -3  -7 34.0511 5.70302   5
   2  -3  -7 27.5938 8.88712   2
  -2   3   7 45.3981 6.47837   2
   2  -3  -7 24.3865 5.41086   7
  -2  -3   7 32.4617 6.90404   7
  -2   3   7 27.4630 5.40816   8
   2  -3  -6 3385.57 282.322   2
  -2   3   6 4266.60 279.052   8
  -2   3   6 4360.22 278.812   2
   2  -3  -6 4111.61 277.831   5
   2  -3  -6 4538.75 278.827   7
  -2  -3   6 4597.11 280.364   7
   2  -3  -5 26.3004 5.06226   5
   2  -3  -5 30.0725 8.74122   2
  -2  -3   5 29.3481 6.95301   7
  -2   3   5 31.3007 5.88128   2
  -2   3   5 33.5609 6.77309   8
   2  -3  -4 2713.99 165.054   5
  -2  -3   4 2407.58 165.659   7
  -2   3   4 2511.99 166.258   2
   2  -3  -4 2985.67 165.357   3
  -2   3   4 2726.74 168.451   8
   2  -3  -3 30.0326 4.55985   3
   2  -3  -3 39.2247 6.04451   5
  -2   3   3 33.1297 4.95188   5
  -2  -3   3 29.2206 5.62411   7
  -2   3   3 40.1484 8.59140   8
   2  -3  -3 16.1358 7.95821   2
   2   3  -3 35.5243 3.56800   1
  -2   3   3 41.8102 6.67990   2
  -2   3   2 1258.53 86.4018   5
   2  -3  -2 1260.47 87.0841   5
  -2   3   2 1302.33 85.5486   4
  -2  -3   2 1467.00 86.3317   4
  -2   3   2 1310.86 91.2987   8
   2  -3  -2 1395.55 93.7871   8
   2  -3  -2 1358.53 84.9103   3
   2  -3  -1 382.886 25.7499   6
   2   3  -1 381.641 25.9370   6
  -2  -3   1 367.408 25.7843   1
   2  -3  -1 378.108 29.1249   5
  -2   3   1 350.961 25.6163   4
   2   3  -1 369.309 25.8028   4
   2  -3  -1 371.007 25.9949   4
  -2  -3   1 342.260 25.7045   4
  -2  -3   1 344.951 26.5856   7
  -2   3   1 347.618 29.7184   2
   2  -3  -1 423.480 34.0362   8
  -2   3   1 359.270 25.3212   3
   2  -3  -1 328.441 24.9258   3
   2  -3   0 238.076 23.3242   8
  -2   3   0 219.654 20.2007   2
  -2  -3   0 224.133 16.4533   7
  -2  -3   0 204.833 15.8372   6
  -2   3   0 201.766 15.7156   6
   2   3   0 191.471 15.9438   6
   2  -3   0 260.289 21.8733   5
   2   3   0 209.017 15.6824   4
   2  -3   0 199.147 15.5598   4
  -2  -3   0 209.216 16.9197   1
   2  -3   0 197.480 14.9599   3
  -2   3   0 220.341 15.1377   3
  -2  -3  -1 1050.73 74.7992   6
  -2   3  -1 994.665 74.7314   6
  -2   3  -1 1310.16 80.8370   5
  -2   3  -1 1141.16 79.5217   2
  -2   3  -1 1015.64 81.3990   8
   2   3   1 1043.01 73.7281   3
   2  -3   1 1162.74 73.2806   3
  -2  -3  -1 1166.91 74.2272   7
  -2   3  -1 1157.24 73.2651   3
  -2   3  -2 724.351 54.5226   5
  -2   3  -2 727.314 51.4584   2
  -2   3  -2 597.692 52.5049   8
  -2  -3  -2 657.257 45.2673   3
   2   3   2 684.270 45.0266   3
   2  -3   2 690.268 44.6222   3
  -2  -3  -2 673.078 44.9140   7
  -2   3  -2 646.773 44.5016   3
   2   3   3 678.886 46.4214   3
   2   3   3 688.018 45.9446   5
  -2   3  -3 868.973 63.8866   5
  -2   3  -3 820.078 53.9972   2
  -2   3  -3 669.717 54.4032   8
  -2  -3  -3 654.916 46.5925   3
  -2   3  -3 699.518 45.9600   3
  -2  -3  -3 708.036 45.7595   7
   2  -3   3 673.593 49.0297   1
  -2   3  -4 1865.79 137.002   8
   2  -3   4 2109.18 139.258   8
  -2   3  -4 2052.93 128.543   3
  -2  -3  -4 2074.50 129.252   3
  -2   3  -4 2307.77 137.232   2
   2  -3   4 1933.08 131.736   1
   2   3   4 2071.79 129.041   3
  -2  -3  -5 4.26479 2.12119   3
   2   3   5 4.58817 2.25528   3
   2  -3   5 6.84453 4.81197   1
  -2   3  -5 4.99510 5.39490   2
   2  -3   5 12.0097 6.46573   8
  -2   3  -5 14.2173 7.57445   8
  -2   3  -5 5.37187 2.03100   3
  -2   3  -6 4458.33 290.881   2
  -2  -3  -6 4297.80 284.787   3
   2   3   6 4410.91 284.673   3
   2  -3   6 4499.94 294.672   8
   2   3   7 16.6693 3.97333   3
  -2   3  -7 15.2204 6.67511   2
  -2   3  -7 9.34826 5.25510   1
  -2  -3  -7 14.9694 3.71884   3
  -2  -3  -8 1323.97 85.1064   5
   2   3   8 1390.01 87.8686   3
  -2  -3  -8 1286.41 87.4080   3
  -2   3  -8 1143.59 91.1437   1
  -2   3  -8 1218.14 90.8550   2
   2   3   8 1298.17 85.9021   2
  -2  -3  -9 143.544 10.5384   5
  -2  -3  -9 136.825 12.1542   3
  -2   3  -9 134.385 16.1865   1
  -2  -3 -10 456.997 33.1762   5
  -2  -3 -10 520.877 35.1711   3
  -2   3 -10 437.774 39.0286   1
  -2   3 -10 474.870 34.9408   2
  -2  -3 -11 133.972 13.4729   5
  -2  -3 -11 182.310 15.6595   3
  -2   3 -11 163.687 19.2156   1
  -2   3 -11 181.831 13.0556   2
  -2  -3 -12 0.53280 4.28598   5
  -2   3 -12 4.57216 7.85536   1
  -2  -3 -12 1.50863 4.49136   3
  -2   3 -12 7.56874 6.23212   3
  -2   3 -13 251.399 21.6498   3
  -2  -3 -13 244.225 21.6070   3
  -2   3 -13 234.564 25.5183   1
   2   3  14 36.4719 8.98854   8
  -2   3 -14 41.6395 9.20413   3
  -2   3 -14 45.4104 12.8785   1
  -2  -3 -14 54.8223 9.39081   3
  -2   3 -15 41.5106 9.24627   3
  -2   3 -15 6.74817 26.2933   5
  -2  -3 -15 37.8414 9.00506   3
  -2   3 -15 40.1350 12.7444   1
  -2   3 -16 203.784 23.8939   1
  -2  -3 -16 185.290 28.4300   1
  -2  -3 -16 194.769 18.8912   3
  -2   3 -17 1.84852 11.2784   1
  -2  -3 -17 16.5036 16.1663   1
  -2  -3 -18 117.417 25.6862   1
   2  -4 -18 20.7872 11.7271   3
   2   4 -18 20.0083 12.5205   3
   2  -4 -17 66.7182 14.1424   3
   2   4 -17 87.0765 17.3106   3
   2  -4 -16 49.4603 12.6209   3
   2  -4 -15 189.558 21.2417   3
   2   4 -14 79.9377 11.9860   1
   2  -4 -14 69.3502 13.0944   3
   2   4 -13 50.9156 9.37770   1
   2  -4 -13 26.3242 8.92778   3
   2  -4 -12 534.823 37.1424   7
   2  -4 -12 492.008 38.6633   3
   2   4 -12 409.954 35.4824   1
   2  -4 -11 5.86847 4.98852   7
   2  -4 -11-8.77525 6.99943   3
   2   4 -11-1.65893 5.68134   8
   2  -4 -11 1.58169 4.52594   5
   2   4 -10 394.588 32.5483   8
   2  -4 -10 409.612 31.5483   3
   2  -4 -10 340.560 28.8655   5
   2   4  -9 90.9344 14.3824   8
  -2   4   9 94.7356 10.0866   8
  -2   4   9 119.423 11.6015   2
   2  -4  -9 122.284 12.9342   3
   2  -4  -9 93.2483 11.1572   5
   2   4  -8 392.509 34.2969   8
  -2   4   8 370.428 31.0344   8
  -2   4   8 452.097 31.7644   2
   2  -4  -8 427.632 32.2173   3
   2  -4  -8 388.848 30.5863   5
  -2   4   7 874.279 60.0819   2
  -2   4   7 733.777 60.0461   8
   2  -4  -7 899.788 59.1494   5
  -2   4   6 560.475 42.1512   2
  -2   4   6 502.337 43.0456   8
   2  -4  -6 580.286 40.9479   5
  -2  -4   6 585.300 43.0577   7
  -2  -4   5 1690.68 117.719   7
  -2   4   5 1862.01 120.930   8
  -2   4   5 1902.37 119.117   2
   2  -4  -5 1547.81 115.075   3
   2  -4  -5 1837.34 116.844   5
  -2  -4   4 520.714 38.7459   7
  -2   4   4 473.146 39.4384   2
  -2   4   4 517.935 42.0365   8
   2  -4  -4 492.511 36.0825   3
   2  -4  -4 540.669 37.9194   5
  -2   4   3 1521.17 102.101   5
   2  -4  -3 1593.24 103.718   5
  -2   4   3 1576.92 105.824   2
   2  -4  -3 1466.64 100.553   3
  -2   4   3 1462.71 107.751   8
   2  -4  -2 1117.11 76.2018   5
  -2   4   2 1029.79 71.7093   4
  -2  -4   2 1102.59 72.2453   4
   2  -4  -2 1043.91 71.5488   3
  -2   4   2 1100.02 74.2632   5
  -2   4   2 1085.79 80.3712   8
   2  -4  -1 12.9073 2.90306   6
   2   4  -1 10.3935 2.80822   6
  -2   4   1 22.4637 5.74882   5
   2  -4  -1 4.09612 5.94353   5
  -2   4   1 16.7411 2.99707   4
  -2   4   1 9.03148 7.83077   8
  -2  -4   1 16.0430 3.58053   1
  -2   4   1 3.98942 6.05593   2
   2  -4  -1 11.7535 2.58094   3
  -2   4   1 12.3801 2.94940   3
  -2   4   0 1600.60 101.956   2
   2  -4   0 1625.66 108.426   5
   2  -4   0 1423.21 93.3765   4
   2   4   0 1407.63 93.3486   4
   2   4   0 1450.69 93.8255   3
   2  -4   0 1306.06 93.1372   3
  -2   4   0 1434.88 93.2139   3
  -2   4   0 1415.89 93.5181   6
  -2   4  -1 109.718 14.6170   2
  -2   4  -1 93.8160 16.5025   8
   2  -4   1 103.025 8.22816   3
   2   4   1 120.605 9.06622   3
  -2   4  -1 90.6945 9.01169   6
  -2  -4  -1 96.1896 9.06513   6
  -2   4  -1 87.0998 8.03533   3
  -2   4  -2 619.115 40.2009   3
   2   4   2 601.914 40.5393   3
   2  -4   2 559.089 40.0926   3
  -2  -4  -2 555.494 40.8025   3
  -2   4  -2 525.895 50.1877   8
  -2   4  -3 770.758 41.1618   3
  -2  -4  -3 720.115 41.9398   3
   2   4   3 685.718 41.4668   3
  -2   4  -3 654.957 53.0333   8
   2   4   4 977.269 69.5417   3
  -2   4  -4 1217.64 92.8451   5
  -2   4  -4 898.352 79.0160   8
   2  -4   4 1135.56 81.6387   8
  -2  -4  -4 1034.60 70.0039   3
  -2   4  -4 1030.45 69.2141   3
   2  -4   4 1033.72 71.9761   1
  -2  -4  -4 1093.46 68.6129   7
  -2   4  -4 1132.86 79.9062   2
   2  -4   5 596.167 43.3520   1
  -2   4  -5 734.196 51.9938   2
  -2  -4  -5 554.630 40.7253   3
  -2   4  -5 599.909 40.1184   3
  -2   4  -5 554.289 50.0843   8
   2   4   5 594.019 40.5758   3
  -2  -4  -6 2.21714 2.67578   3
   2   4   6 2.52005 3.45559   3
  -2   4  -6 2.89833 2.44759   3
  -2   4  -6 5.49432 7.10612   8
  -2   4  -6-3.75679 6.37381   2
   2   4   7 1155.90 71.5589   3
  -2  -4  -7 945.762 71.2917   3
  -2   4  -7 1048.37 80.1293   8
  -2   4  -7 1159.40 81.2288   2
  -2   4  -8 164.770 20.1548   2
   2   4   8 167.945 14.3175   3
  -2  -4  -8 165.728 14.5154   3
  -2   4  -9 397.020 35.7197   2
   2   4   9 394.329 29.2409   2
   2   4   9 461.573 31.6328   3
  -2  -4  -9 419.464 31.0938   3
  -2   4 -10 242.849 24.2593   2
  -2  -4 -10 260.923 21.2624   3
  -2   4 -11 18.9243 6.91743   2
  -2  -4 -11 35.6306 6.98935   3
  -2  -4 -12 467.229 35.9371   3
  -2  -4 -13 0.90466 5.89717   3
  -2   4 -13 0.97862 7.07244   3
  -2   4 -14 219.096 20.5714   3
  -2  -4 -14 205.579 20.1493   3
  -2  -4 -15 114.853 14.7101   3
  -2   4 -15 124.904 14.2908   3
  -2  -4 -16 122.586 15.1423   3
  -2   4 -16-7.23163 29.5567   5
  -2  -4 -17 73.2391 21.1586   1
   2  -5 -18 99.3252 17.2571   3
   2   5 -18 65.5429 17.7383   3
   2  -5 -17-1.60190 9.99764   3
   2  -5 -16 97.5400 16.1085   3
   2  -5 -15 15.9132 9.96161   3
   2  -5 -14 30.1002 10.0759   3
   2  -5 -13 271.790 22.1168   7
   2   5 -13 222.514 19.8892   1
   2  -5 -13 211.711 22.7408   3
   2  -5 -12 8.39962 7.39032   3
   2  -5 -12 29.7970 7.40235   7
   2   5 -12 14.1259 5.36652   1
   2  -5 -11 393.197 22.4371   7
   2  -5 -11 341.396 23.6133   3
   2   5 -11 333.149 18.8094   1
   2   5 -10 271.058 19.1575   1
   2  -5 -10 277.304 21.9804   7
  -2   5  10 270.274 21.6639   2
   2  -5 -10 227.719 21.3805   5
   2  -5 -10 230.930 22.2874   3
   2   5 -10 220.863 25.8400   8
  -2   5  10 210.040 20.2696   8
   2   5  -9 600.250 52.1792   8
  -2   5   9 633.569 48.3907   8
  -2   5   9 676.013 47.8769   2
   2   5  -9 663.648 43.9656   1
   2  -5  -9 626.547 47.9687   3
   2  -5  -9 636.106 47.5381   5
  -2   5   8 359.118 28.3596   2
  -2   5   8 314.328 29.0452   8
   2  -5  -8 322.424 27.2333   3
   2  -5  -8 352.924 27.5523   5
   2  -5  -7 277.364 23.7057   5
  -2   5   7 282.087 25.2609   2
  -2   5   7 312.241 27.4896   8
  -2   5   6 800.098 62.7831   2
  -2   5   6 904.240 65.6112   8
   2  -5  -6 877.242 61.2216   5
  -2   5   5 118.366 14.8297   2
  -2   5   5 122.830 17.2844   8
   2  -5  -5 125.269 12.1012   3
   2  -5  -5 150.481 14.7936   5
   2  -5  -4 669.866 48.7872   5
  -2   5   4 636.806 52.6563   8
  -2   5   4 606.440 49.8232   2
   2  -5  -4 669.616 45.1813   3
  -2   5   4 603.678 45.6481   5
   2  -5  -3 182.346 19.0844   5
  -2   5   3 144.482 13.4074   4
  -2  -5   3 189.390 14.9396   4
  -2   5   3 144.212 19.9146   8
  -2   5   3 153.918 18.0444   2
   2  -5  -3 144.584 13.1752   3
  -2   5   3 174.389 15.4577   5
  -2  -5   2 1105.20 76.0392   4
  -2   5   2 1070.77 75.6248   4
   2  -5  -2 1084.83 75.9956   3
  -2  -5   2 1201.55 75.3414   1
  -2   5   2 897.895 83.8187   8
  -2   5   2 1240.69 79.8410   5
  -2   5   1 555.598 42.9350   5
   2   5  -1 577.741 38.4288   6
   2  -5  -1 591.930 38.2437   6
  -2   5   1 499.162 38.0692   3
   2  -5  -1 529.001 38.3584   3
  -2   5   1 478.912 47.6887   8
  -2   5   0 360.350 31.9579   5
   2  -5   0 352.623 25.3608   4
   2   5   0 337.366 25.1549   4
  -2   5   0 448.718 37.1489   2
  -2   5   0 379.093 25.7234   3
   2  -5   0 354.857 25.6587   3
  -2   5  -1 2625.69 160.937   3
   2  -5   1 2325.91 160.718   3
   2   5   1 2359.68 161.178   3
  -2   5  -1 2616.59 175.178   8
  -2  -5  -1 2469.26 161.117   6
  -2   5  -1 2389.98 161.124   6
  -2   5  -2 297.555 33.8786   8
  -2  -5  -2 300.113 23.2319   3
   2   5   2 305.705 22.8350   3
   2  -5   2 340.976 22.8876   3
  -2   5  -2 308.534 22.5446   3
  -2  -5  -3 1938.12 124.587   3
  -2   5  -3 2059.15 123.787   3
   2   5   3 2048.17 124.285   3
  -2   5  -3 2056.07 139.556   8
  -2  -5  -4 832.386 61.8057   3
  -2   5  -4 923.753 61.2096   3
   2   5   4 983.388 61.8300   3
  -2   5  -4 833.238 73.9267   8
  -2   5  -4 1031.80 85.1155   5
   2   5   5 57.7574 6.46684   3
  -2   5  -5 66.6526 15.7629   8
  -2  -5  -5 46.3154 6.35326   3
  -2   5  -5 45.3377 5.61582   3
   2  -5   5 65.4830 8.23526   1
   2   5   6 1361.88 82.8788   3
  -2   5  -6 1251.56 82.0730   3
  -2  -5  -6 1161.79 82.8312   3
   2  -5   6 1146.51 84.5605   1
  -2   5  -6 1114.79 93.5924   8
   2   5   7 7.35250 3.81256   3
  -2   5  -7-2.22167 8.36874   2
  -2   5  -7-2.16081 9.96606   8
  -2  -5  -7 7.34443 3.46372   3
  -2   5  -7 5.66633 3.11471   3
  -2   5  -8 451.993 33.1439   3
  -2  -5  -8 471.170 34.5168   3
  -2   5  -8 574.197 47.2223   2
   2   5   8 465.720 34.0998   3
  -2  -5  -9 479.308 36.0530   3
  -2   5  -9 506.191 44.9042   2
   2   5   9 494.393 37.6570   2
  -2  -5 -10 506.227 36.6132   3
   2   5  10 457.942 34.1112   2
  -2   5 -10 546.708 43.8448   2
  -2  -5 -11 301.809 24.5792   3
  -2   5 -11 271.314 28.6894   2
  -2  -5 -12-1.83327 5.97579   3
  -2   5 -12-1.25859 7.30020   2
  -2  -5 -13 407.354 33.0874   3
  -2  -5 -14 4.18559 7.43675   3
  -2   5 -14 3.18056 7.98345   3
  -2  -5 -15 100.944 13.6367   3
  -2   5 -15 7.65282 30.2115   5
  -2  -5 -16 66.7317 12.0634   3
  -2   5 -16-7.71472 31.8435   5
  -2   5 -17 15.1841 31.1504   5
   2   6 -18-3.66051 13.7778   3
   2  -6 -17 96.5980 17.5172   3
   2  -6 -16 31.6499 11.7116   3
   2  -6 -15 256.124 26.6886   3
   2  -6 -14 58.1956 12.8007   3
   2  -6 -13 91.8450 14.3332   3
   2  -6 -13 101.282 12.9304   7
   2  -6 -12 173.844 19.7520   3
   2  -6 -12 184.131 17.4874   7
  -2   6  11 2.61222 6.02060   8
   2  -6 -11 3.48088 5.96103   7
   2  -6 -11-3.42293 6.61784   3
  -2   6  11 1.79279 4.99006   2
  -2   6  10 260.169 22.5201   2
  -2   6  10 206.636 22.5639   8
   2   6 -10 235.517 27.7994   8
   2  -6 -10 288.571 22.5981   7
   2  -6 -10 249.410 23.0374   3
   2  -6  -9 309.392 27.6669   5
  -2   6   9 348.329 28.4593   2
  -2   6   9 274.514 29.2676   8
   2   6  -9 270.467 31.7168   8
   2  -6  -9 381.366 27.7908   7
   2  -6  -9 350.688 28.0222   3
  -2   6   8 152.784 21.1475   8
  -2   6   8 213.147 20.6611   2
   2  -6  -8 228.153 20.2343   5
   2  -6  -8 200.735 18.7108   3
  -2   6   7 744.866 61.8706   2
  -2   6   7 778.760 65.1212   8
   2  -6  -6 3.84719 5.79241   5
  -2   6   6 10.6056 7.44200   8
  -2   6   6 1.46970 5.70742   2
  -2   6   5 1476.77 108.826   8
  -2   6   5 1495.45 106.543   2
  -2   6   5 1560.60 100.883   5
   2  -6  -5 1367.18 100.083   3
   2  -6  -5 1623.17 107.472   5
   2  -6  -4 95.5057 10.1435   3
  -2   6   4 105.790 11.5102   5
   2  -6  -4 137.659 18.6042   5
  -2   6   4 103.687 15.3772   2
  -2   6   4 78.8210 15.6485   8
  -2   6   3 1606.58 112.006   5
  -2   6   3 1786.61 118.813   2
   2  -6  -3 1632.30 109.334   3
  -2  -6   3 1772.42 109.751   4
  -2   6   3 1485.50 108.485   4
  -2   6   3 1482.89 118.442   8
  -2   6   2 177.428 17.9891   5
  -2  -6   2 215.604 14.9248   1
  -2   6   2 139.783 22.1093   8
   2  -6  -2 147.197 14.7105   3
  -2   6   2 169.340 14.9523   3
   2  -6  -2 190.124 14.2079   6
   2   6  -2 193.719 14.7893   6
  -2  -6   2 180.834 14.6126   4
  -2   6   2 191.933 14.4510   4
   2  -6  -1 112.858 9.69640   3
   2   6  -1 94.3568 8.97591   6
  -2   6   1 94.7002 17.3482   8
  -2   6   1 87.7771 12.8884   5
   2  -6   0 1018.20 68.3441   3
   2   6   0 995.798 67.4715   4
  -2   6   0 1095.61 77.8998   5
   2   6   1-1.32293 2.08755   4
  -2   6  -1 7.10419 8.91187   5
   2  -6   1 0.43222 2.15195   3
  -2   6  -1-1.24518 2.06654   3
   2   6   1 0.46128 2.94361   3
  -2   6  -1-2.56818 9.35805   8
  -2   6  -1 0.35772 1.87407   6
  -2  -6  -1-0.35279 1.87784   6
   2  -6   1-0.95144 2.15184   4
  -2   6  -2 152.448 24.0722   8
   2   6   2 162.430 13.2539   3
   2  -6   2 156.649 13.0027   3
  -2  -6  -2 134.015 13.3506   3
  -2  -6  -2 151.968 13.1514   6
  -2   6  -2 172.808 13.1989   3
  -2   6  -3 1193.47 74.5191   3
  -2   6  -3 1119.03 89.8454   8
   2   6   3 1241.50 75.1219   3
  -2   6  -4 249.542 37.7054   5
  -2   6  -4 246.133 18.4396   3
  -2  -6  -4 224.605 19.1331   3
  -2   6  -4 231.553 30.8844   8
   2   6   4 210.581 18.4438   3
   2   6   5 1174.09 76.6064   3
  -2   6  -5 1135.20 76.0361   3
  -2  -6  -5 1048.14 76.8550   3
   2  -6   5 1193.25 78.4369   1
  -2  -6  -6 21.0722 4.99148   3
   2  -6   6 15.8622 6.00113   1
  -2  -6  -7 1127.06 77.1503   3
  -2  -6  -8 4.15600 4.33107   3
  -2   6  -9 655.072 45.4986   3
  -2  -6  -9 624.925 46.9822   3
  -2   6  -9 734.591 60.3202   2
  -2   6 -10 113.525 11.0689   3
  -2  -6 -10 116.849 12.8112   3
   2   6  10 107.240 12.6366   2
  -2   6 -10 120.304 19.9505   2
   2   6  11 72.0099 8.35357   2
  -2   6 -11 55.9647 16.2389   2
  -2  -6 -11 94.5565 11.2985   3
  -2   6 -12 127.579 19.8233   2
  -2  -6 -12 138.249 15.0720   3
  -2  -6 -13 6.18728 7.14063   3
  -2  -6 -14 35.2798 9.49543   3
  -2   6 -15 8.03132 31.5008   5
  -2  -6 -15 179.857 18.3945   3
  -2   6 -16 8.00859 30.3059   5
  -2  -6 -16 55.7935 12.3825   3
  -2   6 -17 15.8759 32.5697   5
   2  -7 -17-1.66406 10.5029   3
   2  -7 -16 47.8900 13.3676   3
   2  -7 -15 39.8774 11.8264   3
   2  -7 -14-1.46165 7.65718   3
   2  -7 -13 366.149 32.6879   3
   2  -7 -13 367.347 29.8098   7
   2  -7 -12 7.14467 6.67108   7
   2  -7 -12 5.14387 7.55735   3
  -2   7  12-1.91407 6.30483   2
   2  -7 -11 449.578 39.1437   3
   2  -7 -11 523.358 37.9902   7
  -2   7  11 490.411 38.5917   2
  -2   7  10 31.7325 10.8375   8
   2  -7 -10 44.1084 8.49381   7
   2  -7 -10 65.4173 10.6707   3
  -2   7  10 39.4083 9.43917   2
   2  -7  -9 1368.57 89.0280   5
  -2   7   9 1048.39 87.4765   8
  -2   7   9 1139.40 85.7962   2
   2  -7  -9 1134.91 83.8642   3
   2  -7  -9 1307.11 84.2980   7
   2  -7  -8 119.835 18.4188   5
  -2   7   8 91.1523 13.6726   2
  -2   7   8 87.5066 16.1041   8
  -2   7   7 320.121 31.2500   2
   2  -7  -7 382.797 36.3100   5
  -2   7   7 314.528 33.9833   8
  -2   7   6 308.764 31.0419   2
  -2   7   6 262.686 31.6394   8
   2  -7  -5 11.2594 11.9893   5
  -2   7   5-1.91067 7.41910   2
  -2   7   5 14.8520 10.1839   8
   2  -7  -5 5.19480 4.48279   3
  -2   7   5 4.85870 4.18589   5
  -2   7   4 94.7649 16.1631   2
  -2  -7   4 78.2932 10.0569   4
  -2   7   4 88.6261 9.46101   4
  -2   7   4 103.421 11.6139   5
  -2   7   4 57.4753 15.3423   8
   2  -7  -4 94.6824 10.0833   3
  -2   7   3 879.688 64.7092   5
  -2   7   3 817.659 71.2343   8
  -2   7   3 875.021 60.0677   4
  -2  -7   3 910.444 60.6663   4
   2  -7  -3 917.315 61.6819   3
  -2   7   3 968.072 73.0682   2
  -2  -7   3 871.467 58.5953   1
   2   7  -2 137.483 11.9030   6
   2  -7  -2 152.590 11.6145   6
  -2   7   2 112.913 21.7279   8
   2  -7  -2 135.806 12.8972   3
  -2   7   2 147.265 16.5200   5
  -2   7   1 1314.22 97.9380   8
  -2   7   1 1353.01 84.5298   3
   2  -7  -1 1118.41 84.0405   3
  -2   7   1 1354.92 92.5701   5
  -2   7   0 10.6986 4.13606   3
   2  -7   0 12.2240 3.61485   3
  -2   7   0 12.6133 7.94704   5
  -2   7  -1 1282.63 83.3982   3
   2  -7   1 1167.50 83.2842   3
   2   7   1 1195.96 81.8073   4
   2  -7   1 1275.20 81.9348   4
  -2   7  -2 110.095 9.92346   6
  -2  -7  -2 103.439 9.57909   6
  -2  -7  -2 100.170 10.7426   3
   2  -7   2 109.835 10.3688   3
  -2  -7  -3 961.887 66.5260   3
  -2  -7  -4 47.9379 7.02948   3
   2   7   4 75.2356 10.6410   5
   2   7   5 106.913 8.27993   5
  -2  -7  -5 91.9442 10.7966   3
  -2   7  -5 127.259 10.8677   3
   2  -7   5 107.420 11.8257   1
  -2   7  -6 242.143 17.4029   3
   2  -7   6 222.619 18.9724   1
  -2   7  -7 11.3768 4.67191   3
  -2  -7  -7 11.0550 4.85809   3
  -2  -7  -8 75.4684 10.0863   3
  -2   7  -8 93.9761 9.53435   3
  -2  -7  -9 507.937 39.5931   3
  -2   7  -9 618.795 54.9268   2
  -2   7 -10 108.657 23.0448   2
  -2  -7 -10 118.482 13.5120   3
   2   7  10 121.052 15.9261   2
  -2  -7 -11 331.587 27.4157   3
  -2   7 -11 255.083 36.2794   2
   2   7  11 334.095 26.7189   2
  -2  -7 -12-3.11219 6.76228   3
  -2   7 -12 9.04258 12.5830   2
  -2  -7 -13 404.357 33.7201   3
  -2  -7 -14 4.68319 8.02491   3
  -2  -7 -15 104.580 15.0911   3
  -2   7 -15 33.2974 35.5560   5
  -2  -7 -16 10.2757 9.83893   3
  -2   7 -16 8.33608 34.1924   5
  -2   7 -17-8.17154 33.5156   5
   2  -8 -16 16.8772 11.5018   3
   2  -8 -15 325.963 31.6612   3
   2  -8 -14 21.1629 10.2476   3
  -2   8  13 69.8881 12.3415   2
   2  -8 -13 86.6338 14.6160   3
   2  -8 -12 19.9299 7.60572   7
  -2   8  12 31.4754 9.05843   2
   2  -8 -12 26.6241 9.26152   3
   2  -8 -11-0.93601 6.47146   7
  -2   8  11 6.34367 7.45463   2
   2  -8 -11-6.22000 7.58521   3
   2  -8 -10 22.3629 7.39911   7
   2  -8 -10 8.13979 6.91880   3
  -2   8  10 24.7987 9.57094   2
  -2   8   9 353.465 35.4259   2
   2  -8  -9 445.161 34.0397   3
  -2   8   8 3.56712 8.55942   2
  -2   8   7 1148.96 87.0091   2
  -2   8   6-4.20792 8.16398   2
   2  -8  -6-2.62548 5.40286   3
  -2   8   5 629.520 60.6668   2
   2  -8  -5 776.437 53.5582   3
  -2   8   5 715.275 53.5944   5
  -2  -8   5 767.703 54.2117   4
  -2   8   4 3.30255 4.86111   5
  -2   8   4 2.43781 8.58357   2
   2  -8  -4 2.21940 3.87931   3
  -2  -8   4 3.11466 3.56929   4
  -2   8   4 2.54844 3.22158   4
   2   8  -3 1447.66 90.0974   6
   2  -8  -3 1347.29 89.0292   6
  -2   8   3 1282.38 89.2279   4
  -2  -8   3 1209.61 89.4635   4
  -2  -8   3 1414.75 88.8144   1
   2  -8  -3 1207.41 91.0546   3
  -2   8   3 1689.56 109.535   2
  -2   8   3 1567.71 96.6640   5
  -2   8   2 1.52033 6.23901   5
   2   8  -2 3.15978 2.63745   6
   2  -8  -2 5.23856 3.65184   3
  -2   8   1 227.925 27.6460   5
   2  -8  -1 292.184 22.2334   3
   2  -8   0 127.246 12.2625   3
  -2   8   0 133.687 20.0810   5
   2   8   1 5.17021 2.40195   4
   2  -8   1 4.88725 3.78096   3
  -2   8  -1-3.06964 10.4173   5
  -2  -8  -2 150.627 11.8247   6
  -2   8  -2 143.678 11.9151   6
   2  -8   2 144.767 11.5536   4
   2   8   2 136.421 11.6534   4
  -2   8  -2 134.419 25.1413   5
   2  -8   2 175.074 14.2492   3
  -2  -8  -3 395.749 31.2769   3
  -2  -8  -3 415.942 29.9046   6
   2   8   4 149.409 16.3481   5
  -2  -8  -4 101.157 11.8251   3
   2  -8   5 866.688 55.6602   1
  -2   8  -5 706.575 87.3368   5
   2   8   5 765.058 52.2625   5
  -2  -8  -5 703.062 54.5673   3
   2  -8   6 4.62273 5.48947   1
  -2  -8  -6 8.58265 5.31090   3
  -2  -8  -7 1571.52 107.000   3
   2  -8   7 1565.64 106.632   1
  -2  -8  -8-0.88000 5.79581   3
  -2  -8  -9 777.629 56.7130   3
  -2  -8 -10-2.93975 6.25290   3
   2   8  10 1.66927 8.88415   2
  -2   8 -10 13.2844 14.6557   2
  -2  -8 -11 58.3152 10.3568   3
   2   8  11 51.7330 10.8008   2
  -2   8 -12 13.2220 14.1319   2
  -2  -8 -12 22.2819 8.61096   3
  -2  -8 -13 7.09416 8.48414   3
  -2  -8 -14 22.5053 9.56002   3
  -2   8 -14-8.52222 34.0388   5
  -2  -8 -15 143.593 17.1057   3
  -2   8 -15-8.56800 34.7252   5
  -2  -8 -16 12.2360 9.52072   3
  -2   8 -16 16.9702 33.8790   5
   2  -9 -15 31.7961 13.1440   3
   2  -9 -14-1.58973 10.9914   3
   2  -9 -13 195.537 22.6086   3
  -2   9  12-6.53035 8.15223   2
   2  -9 -12-0.92157 6.66149   7
   2  -9 -12 2.83346 8.53603   3
   2  -9 -11 268.315 26.3988   3
   2  -9 -11 287.917 25.0421   7
  -2   9  11 272.443 27.2785   2
  -2   9  10 39.3844 11.1555   2
   2  -9 -10 37.8108 9.27890   7
   2  -9 -10 28.6176 9.48762   3
  -2   9   9 614.096 51.4077   2
   2  -9  -9 594.836 46.7463   3
  -2   9   8-4.12856 9.31801   2
  -2   9   7 122.016 19.7914   2
   2  -9  -6 6.52998 5.90511   3
  -2  -9   6 8.21202 6.42234   4
  -2   9   6 2.42627 9.69546   2
  -2   9   6 8.94468 5.53714   5
  -2  -9   5 55.9340 8.44295   4
  -2   9   5 59.1077 7.96485   4
  -2   9   5 88.3865 11.4800   5
  -2   9   5 49.1667 15.9135   2
   2  -9  -5 63.5947 9.48899   3
  -2  -9   4 21.1530 4.73828   4
  -2   9   4 25.2432 4.53223   4
  -2   9   4 28.5953 12.4361   2
   2  -9  -4 22.6994 4.22644   6
   2  -9  -4 41.8367 7.34075   3
  -2   9   4 27.7389 7.67777   5
   2   9  -3 254.764 18.7684   6
  -2  -9   3 242.377 18.4033   1
   2  -9  -3 206.965 20.2880   3
   2  -9  -3 250.870 18.0768   6
  -2   9   3 236.922 24.2031   5
   2  -9  -2 15.5358 5.19850   3
  -2   9   2 26.0128 9.15818   5
  -2   9   1 1027.49 85.4917   5
   2  -9  -1 1160.23 77.6997   3
  -2   9   0 16.1096 12.4883   5
   2  -9   0 28.2670 6.10673   3
   2  -9   1 1218.66 83.6634   3
  -2   9  -1 1214.95 101.214   5
   2   9   2 10.9837 2.77347   4
  -2   9  -2 3.98742 12.4613   5
  -2   9  -3 658.800 46.2178   6
  -2  -9  -3 647.554 45.8410   6
  -2  -9  -3 674.414 49.1039   3
  -2   9  -3 771.701 73.2271   5
   2  -9   3 693.293 45.7490   4
  -2  -9  -4 39.2777 6.17308   6
  -2  -9  -4 20.2430 6.40338   3
   2   9   4 31.8881 9.42991   5
  -2  -9  -5 23.2747 6.61288   3
   2   9   5 29.0889 5.68522   5
  -2   9  -6-6.57165 20.5148   5
   2  -9   6 13.9664 6.51564   1
  -2  -9  -6 7.12186 5.33051   3
  -2   9  -7-6.92924 23.5056   5
  -2  -9  -7 0.91614 5.02593   3
  -2  -9  -8 11.6476 7.22964   3
  -2  -9  -9 241.148 22.5463   3
  -2  -9 -10-3.28848 6.44921   3
   2   9  10-6.28534 11.8317   2
  -2   9 -10-10.8294 15.1921   2
   2   9  11 212.280 23.7824   2
  -2  -9 -11 225.567 21.6139   3
  -2  -9 -12 1.23019 8.58411   3
  -2   9 -12-8.42748 30.7085   5
  -2   9 -12-6.01720 14.4336   2
  -2   9 -13-8.65422 34.9709   5
  -2  -9 -13 309.286 24.3464   3
  -2  -9 -14 10.9354 9.90547   3
  -2   9 -14 17.4199 36.6547   5
  -2  -9 -15 137.180 18.4599   3
  -2   9 -15 17.4271 36.4984   5
  -2  -9 -16-5.90457 10.1178   3
   2 -10 -15 197.492 24.8223   3
   2 -10 -14-3.36095 12.0429   3
   2 -10 -13 33.5078 12.2021   3
   2 -10 -12 24.1528 11.1431   3
  -2  10  12 10.6318 9.74970   2
   2 -10 -11 5.24150 7.70323   7
   2 -10 -11-2.84738 8.57686   3
  -2  10  11-1.75799 10.0609   2
   2 -10 -10 13.1937 8.76440   3
  -2  10  10 27.6458 12.7884   2
   2 -10  -9 181.293 19.9221   3
  -2  10   9 183.158 24.5020   2
  -2  10   8 35.7493 13.8323   2
  -2 -10   7 656.007 51.6107   4
  -2  10   7 760.550 62.0151   2
  -2  10   6 28.7608 7.03204   5
   2 -10  -6 20.1575 7.51094   3
  -2 -10   6 28.0717 6.93013   4
  -2  10   6 13.6569 4.82474   4
  -2  10   6 5.50560 10.4350   2
  -2 -10   5 892.112 62.2887   4
  -2  10   5 871.841 61.6351   4
  -2  10   5 1024.39 79.9053   2
  -2  10   5 966.150 67.0095   5
   2 -10  -5 915.013 65.0279   3
  -2  10   4 9.67866 10.9606   2
  -2  10   4 9.98129 7.37246   5
   2 -10  -4 9.80972 5.84400   3
   2 -10  -4 9.33934 3.24839   6
   2  10  -4 8.87579 4.02510   6
  -2 -10   3 882.976 58.6966   1
  -2  10   3 796.739 65.5808   5
  -2  10   3 1019.28 82.3981   2
   2 -10  -3 830.387 61.4658   3
  -2  10   2 25.6065 16.4338   2
  -2  10   2 42.5692 11.0527   5
   2 -10  -2 55.9074 8.43299   3
  -2  10   1 49.4181 15.4085   5
   2 -10  -1 54.8147 8.67225   3
  -2  10   0 14.4032 12.4675   5
   2 -10   0 59.6484 8.74071   3
  -2  10  -1 3.54678 12.4931   5
   2 -10   1 7.22448 5.19545   3
  -2  10  -2 33.8823 18.3902   5
   2 -10   3 371.451 27.7221   4
   2  10   3 478.475 28.5778   4
  -2 -10  -4 10.4419 6.11667   3
  -2  10  -4 11.3537 4.15032   6
  -2 -10  -4 15.6606 3.91301   6
  -2  10  -4-5.84701 19.8526   5
   2  10   4 18.0668 8.65800   5
  -2 -10  -5 747.288 55.0307   3
   2  10   5 748.754 53.1706   5
  -2 -10  -6 7.99579 5.80272   3
   2  10   6 3.50564 2.32713   5
  -2  10  -7 301.205 65.7863   5
  -2 -10  -7 830.683 53.0909   3
  -2  10  -8-7.72957 26.2305   5
  -2 -10  -8 13.9092 7.22530   3
  -2 -10  -9 431.389 30.2042   3
  -2  10  -9 48.1775 40.3303   5
   2  10  10 17.1844 13.7274   2
  -2  10 -10 3.87090 16.7409   2
  -2 -10 -10 37.9203 10.2421   3
   2  10  11 59.4322 13.9936   2
  -2 -10 -11 40.1450 10.5928   3
  -2  10 -11 18.6784 21.5264   2
  -2  10 -12 8.72622 33.8711   5
  -2 -10 -12 19.8825 9.81167   3
  -2  10 -13-8.84952 30.0240   5
  -2 -10 -13 9.76057 9.83052   3
  -2  10 -14-8.85282 33.3165   5
  -2 -10 -14-1.45953 9.71084   3
  -2 -10 -15 77.1696 15.6723   3
   2 -11 -13 202.048 23.8276   3
   2 -11 -12 21.3389 10.6805   3
  -2  11  12 34.7623 12.4680   2
  -2  11  11 174.074 24.5148   2
   2 -11 -11 212.769 22.9978   3
  -2  11  10 6.66856 10.8779   2
   2 -11 -10 8.22457 9.22293   3
  -2  11   9 270.309 33.2872   2
   2 -11  -9 347.635 28.8318   3
  -2 -11   9 257.285 27.4927   4
  -2  11   8 18.8636 11.6494   2
  -2 -11   8 24.4765 8.53637   4
  -2  11   8 6.01369 6.05399   4
  -2  11   7 55.1872 17.2276   2
  -2 -11   7 55.1458 9.39658   4
  -2  11   7 56.8050 8.38806   4
  -2  11   6 42.3520 9.76367   5
  -2 -11   6 39.2956 7.02163   4
  -2  11   6 35.5426 6.51699   4
  -2  11   6 55.4875 17.8277   2
   2 -11  -6 45.2476 10.0557   3
   2  11  -5-0.51102 3.90597   6
  -2  11   5 1.98440 3.31885   4
  -2  11   5-5.19243 6.22746   5
   2 -11  -5-2.02773 6.81207   3
  -2  11   5 6.66792 12.5468   2
  -2  11   4 61.8931 12.2471   5
  -2  11   4 39.6525 18.3320   2
   2 -11  -4 60.6538 10.1188   3
   2 -11  -3 183.133 20.3209   3
  -2  11   3 289.401 38.2286   2
  -2 -11   3 249.875 18.4216   1
  -2  11   3 233.676 25.3088   5
  -2  11   2 40.1455 13.1503   5
   2 -11  -2 48.6429 8.51884   3
  -2  11   1 394.836 39.2350   5
   2 -11  -1 361.225 30.0343   3
  -2  11   0 3.06602 10.4022   5
   2 -11   0 2.70761 5.44010   3
  -2  11  -1 621.193 66.5633   5
   2 -11   1 698.790 50.4816   3
  -2  11  -2-4.40909 16.5953   5
   2  11   3 669.934 50.5233   5
  -2  11  -3 214.988 46.7238   5
  -2 -11  -4 81.7070 11.1891   3
  -2  11  -4 50.0719 5.05538   6
   2 -11   4 31.6722 3.91617   4
  -2  11  -4 5.88444 20.1257   5
   2  11   4 61.3578 13.1569   5
   2  11   5 25.7156 7.17956   5
  -2 -11  -5 39.8667 9.60325   3
  -2  11  -5 23.1543 5.75068   6
   2  11   6 41.5318 5.86128   5
  -2 -11  -6 57.6339 10.5649   3
  -2 -11  -7-2.30285 6.85300   3
  -2  11  -8-7.96783 27.0585   5
  -2 -11  -8 22.6126 8.83707   3
  -2  11  -9-8.24081 27.4234   5
  -2  11  -9 54.2627 24.2051   2
  -2  11 -10 16.7361 19.6830   2
   2  11  10-2.81153 14.4891   2
  -2 -11 -10-3.88244 8.52441   3
  -2  11 -10-16.9758 29.8802   5
  -2  11 -11 39.9710 25.8382   2
  -2  11 -11-8.71624 31.4140   5
  -2 -11 -11 158.454 17.7901   3
   2  11  11 121.332 20.4261   2
  -2 -11 -12 7.08671 9.71501   3
  -2  11 -12-8.83079 32.1801   5
  -2  11 -13 62.4467 41.9340   5
  -2 -11 -13 272.989 26.0055   3
  -2 -11 -14 12.3630 10.6148   3
  -2 -11 -15 70.5280 15.6053   3
   2 -12 -12 83.6566 16.1433   3
  -2  12  11 8.94196 11.7140   2
   2 -12 -11 1.50368 9.80587   3
  -2  12  10 106.978 20.9043   2
   2 -12 -10 88.4394 15.1578   3
  -2  12   9 60.4054 18.2820   2
   2 -12  -9 75.9008 13.8322   3
  -2  12   8 45.0793 17.6700   2
  -2  12   7 207.545 32.7477   2
  -2  12   6 18.8918 8.94841   5
  -2  12   6 3.42135 13.3131   2
   2 -12  -6 20.0280 8.85979   3
  -2  12   5 341.422 41.6055   2
  -2  12   5 283.815 27.3739   5
   2 -12  -5 270.578 25.9696   3
  -2  12   4 11.9701 16.7888   2
   2 -12  -4 3.24365 6.74889   3
  -2  12   4-1.70616 8.64528   5
  -2  12   3 296.405 30.2601   5
   2 -12  -3 273.634 25.0214   3
  -2  12   3 283.495 41.7544   2
  -2  12   2 91.1963 27.3266   2
   2 -12  -2 96.8663 12.7824   3
  -2  12   2 58.7668 15.9712   5
   2 -12  -1 24.4423 7.82610   3
  -2  12   1 24.6208 12.4439   5
  -2  12   0 84.4339 22.0339   5
   2 -12   0 97.9290 12.8306   3
  -2  12  -1-3.86082 14.0704   5
  -2  12  -2 27.1782 19.7342   5
   2  12   2 65.2339 22.1424   5
   2  12   3 179.110 26.4329   5
  -2  12  -3 120.707 32.8247   5
  -2  12  -4 29.2094 24.1713   5
   2  12   4 54.6923 12.1536   5
   2  12   5 143.885 14.7671   5
  -2 -12  -5 137.332 16.7098   3
  -2 -12  -6 9.75012 8.45831   3
  -2  12  -6 28.5312 26.8533   5
  -2 -12  -7 261.744 25.4028   3
  -2 -12  -8 9.15905 8.27900   3
  -2 -12  -9 76.4581 13.8065   3
  -2  12  -9 44.5012 29.1922   2
  -2 -12 -10 73.4692 13.9914   3
   2  12  10 45.6185 19.3220   2
  -2  12 -11-26.5748 32.3098   5
  -2 -12 -11 51.7578 13.1298   3
  -2  12 -11-4.16740 19.2613   2
  -2  12 -12 8.93659 30.4332   5
  -2 -12 -12 47.9087 13.5930   3
  -2 -12 -13 19.3050 12.7243   3
  -2  13  11 130.436 23.2019   2
   2 -13 -11 140.508 19.7507   3
  -2  13  10 13.7314 14.6166   2
   2 -13 -10-2.97329 9.06516   3
   2 -13  -9 161.237 19.8130   3
  -2  13   9 120.577 25.7087   2
  -2  13   8 33.0321 18.2458   2
  -2  13   7-3.54597 14.9228   2
   2 -13  -7 7.97530 9.52877   3
  -2  13   6 145.594 18.0816   5
   2 -13  -6 159.651 18.3978   3
  -2  13   6 146.725 29.1065   2
   2 -13  -5 2.42931 7.31770   3
  -2  13   5-3.01145 8.38119   5
  -2  13   5-7.97114 17.9834   2
  -2  13   4 145.525 20.2732   5
  -2  13   4 140.576 30.6371   2
   2 -13  -4 121.244 15.8984   3
   2 -13  -3 98.3062 13.9907   3
  -2  13   3 108.114 31.9150   2
  -2  13   3 97.5126 17.7510   5
   2 -13  -2 63.7351 11.4809   3
  -2  13   2 67.0491 16.7315   5
  -2  13   2 40.4827 25.9487   2
   2 -13  -1 174.582 19.0463   3
  -2  13   1 217.082 29.7471   5
  -2  13   0-5.00888 19.4303   2
  -2  13   0 3.36981 13.8197   5
   2  13   1 358.561 47.7541   5
  -2  13  -1 193.508 33.1619   5
   2  13   2 14.6997 16.9495   5
  -2  13  -2 4.60882 16.8052   5
   2  13   3 241.723 29.1702   5
  -2  13  -3 99.9384 34.1884   5
   2  13   4 109.672 16.4460   5
  -2  13  -4 23.6970 28.4601   5
  -2  13  -5 19.5805 24.5951   5
  -2 -13  -6 201.669 20.8823   3
  -2  13  -6 42.3919 34.9090   5
  -2 -13  -7 5.50959 9.70472   3
  -2  13  -7 7.60733 26.7825   5
  -2  13  -8 52.6828 25.3975   2
  -2 -13  -8 63.7549 13.8388   3
   2  13   9 70.1423 27.6214   2
  -2  13  -9 86.1169 33.8419   2
  -2 -13  -9 133.346 18.1295   3
   2  13  10 6.62675 18.2157   2
  -2  13 -10 9.31305 21.4953   2
  -2 -13 -10 27.5701 11.5893   3
  -2  13 -10 8.64595 29.3530   5
  -2  13 -11 34.1816 27.3917   2
  -2 -13 -11 52.6976 14.1006   3
  -2  13 -11 8.79780 34.2299   5
  -2 -13 -12 1.65757 11.5661   3
  -2  14  11 2.67838 14.4768   2
  -2  14  10 56.6134 20.1555   2
  -2  14   9 29.5082 16.4330   2
  -2  14   8 118.106 27.5836   2
   2 -14  -7 116.755 16.3734   3
  -2  14   7 77.3153 23.6968   2
   2 -14  -6 18.9035 9.25783   3
  -2  14   6 28.6316 18.8998   2
   2 -14  -5 105.679 15.5000   3
  -2  14   5 59.8452 26.1112   2
  -2  14   5 87.1333 16.2371   5
  -2  14   4 41.8307 13.3602   5
   2 -14  -4 32.1490 10.6774   3
  -2  14   4 45.8415 22.9461   2
  -2  14   3 122.133 20.6172   5
   2 -14  -3 120.167 15.9653   3
  -2  14   3 73.0726 28.4607   2
  -2  14   2 79.4247 18.7287   5
  -2  14   2 100.286 31.0825   2
   2 -14  -2 82.9034 13.7462   3
   2 -14  -1-1.22758 7.91813   3
  -2  14   1 5.89694 12.4059   5
  -2  14   0 118.028 26.5031   5
   2  14   0 132.277 37.5391   5
   2  14   1 4.71629 21.2810   5
  -2  14  -1-4.03105 16.0914   5
  -2  14  -1-5.42523 20.4177   2
   2  14   2 102.726 24.0625   5
  -2  14  -2 102.445 27.0239   5
  -2  14  -2 81.0768 31.1495   2
  -2  14  -3 31.7172 23.4945   5
   2  14   3 48.6907 15.9499   5
  -2  14  -4 5.87759 22.8032   5
  -2  14  -5 19.3644 25.7954   5
  -2  14  -6-6.90968 27.5835   5
  -2  14  -6-5.20658 20.7863   2
  -2  14  -7 14.7630 26.0501   5
  -2  14  -7 46.2292 29.4536   2
  -2 -14  -8 27.7203 12.1216   3
  -2  14  -8 15.4342 27.2046   5
  -2  14  -8 10.2564 21.0802   2
  -2  14  -9 25.4944 25.4715   2
   2  14   9 12.2929 23.8580   2
  -2 -14  -9 41.3631 13.7163   3
   2  14  10 20.3931 17.6395   2
  -2  14 -10 18.8211 23.9312   2
  -2 -14 -10 44.3073 13.7953   3
  -2  15  10 3.19833 15.3448   2
  -2  15   9 31.6418 17.9290   2
  -2  15   8 19.2213 19.1784   2
   2 -15  -7 6.03450 10.7179   3
  -2  15   7-4.12673 17.7933   2
   2 -15  -6 117.278 17.5115   3
  -2  15   6 92.4046 30.4272   2
   2 -15  -5 7.17379 9.45840   3
  -2  15   5 4.58350 20.2309   2
  -2  15   4 126.095 19.9513   5
   2 -15  -4 143.137 18.2988   3
   2 -15  -3 27.3051 11.1441   3
  -2  15   3 16.6833 12.9624   5
  -2  15   3 20.4046 22.0410   2
   2 -15  -2 98.3550 15.5404   3
  -2  15   2 54.4674 31.8164   2
  -2  15   2 121.108 22.2414   5
  -2  15   1 27.2384 16.6937   5
   2  15  -1 26.1625 26.8792   5
  -2  15   0 21.0528 15.8923   5
   2  15   0 22.5523 25.4770   5
  -2  15  -1 47.0966 27.7288   2
  -2  15  -1 4.04504 17.4955   5
   2  15   1 34.6057 23.0642   5
  -2  15  -2-17.4250 20.4615   2
   2  15   2 38.7581 17.4733   5
  -2  15  -2 4.61216 20.3677   5
  -2  15  -3 11.5252 23.7040   2
  -2  15  -3 46.8077 24.5348   5
  -2  15  -4 39.8993 28.4279   2
  -2  15  -4 17.2495 23.6417   5
  -2  15  -5 16.8704 23.6981   2
  -2  15  -5 25.3033 26.6492   5
  -2  15  -6 61.3888 31.0720   2
  -2  15  -6-13.5518 27.0571   5
  -2  15  -7-16.5667 23.8222   2
  -2  15  -7-7.20567 27.9634   5
  -2  15  -8 16.0000 26.5716   2
   2  15   9 8.77138 21.8385   2
  -2  15  -9 5.02661 23.1727   2
  -2  16   7 48.2127 25.6090   2
  -2  16   6-9.32920 19.1390   2
  -2  16   5 4.88024 21.5383   2
  -2  16   4-10.1235 20.7582   2
   2 -16  -4 2.99796 10.1699   3
   2  16  -3-15.9493 37.5214   5
  -2  16   3 12.0616 12.2448   5
  -2  16   3 37.4140 25.1542   2
   2  16  -2 7.17941 28.6925   5
  -2  16   2 22.0220 16.2358   5
  -2  16   2 33.1021 24.9335   2
   2  16  -1 12.5782 28.3776   5
  -2  16   1-3.03302 14.2691   5
  -2  16   1-11.6947 23.9807   2
  -2  16   0 77.9559 22.2933   5
   2  16   0 100.340 31.4362   5
   2  16   1 15.9123 18.7333   5
  -2  16  -1 4.03956 15.6936   5
  -2  16  -1 37.1947 27.9842   2
  -2  16  -2 82.2851 26.5263   5
  -2  16  -2 44.0118 34.2630   2
  -2  16  -3-5.09464 19.7630   5
  -2  16  -3 6.22397 24.8438   2
  -2  16  -4 22.3567 26.8172   5
  -2  16  -4-6.13926 25.1814   2
  -2  16  -5 6.12404 22.3218   5
  -2  16  -5 12.0717 26.6413   2
   2  16   8 15.1050 26.3931   2
   2  17  -4 8.36172 33.3812   5
   2  17  -3-15.4206 31.6356   5
   2  17  -2-13.2426 33.0577   5
  -2  17   2 56.5435 19.5238   5
   2  17  -1-5.54019 27.0862   5
  -2  17   1 9.33415 15.2137   5
  -2  17   0-6.95013 17.3062   5
  -2  17  -1 3.98865 16.7844   5
  -2  17  -2 4.50295 20.3197   5
  -2  17  -3 4.99013 21.5171   5
  -2  18   0 17.1981 20.2398   5
   3   0 -19 11.0693 14.2254   3
   3   0 -18 232.234 26.7346   3
   3   0 -17-4.91736 10.7996   3
   3   0 -16 358.428 33.7180   3
   3   0 -15-7.77187 9.60272   3
   3   0 -14 202.273 22.5086   3
   3   0 -13 5.89572 8.32901   3
   3   0 -12 104.187 14.9518   3
   3   0 -11 1.05162 6.33574   2
   3   0 -11 1.39393 7.18359   3
   3   0 -10 234.034 21.2769   2
   3   0  -9 5.13546 5.63864   7
   3   0  -9 1.75584 5.22831   2
  -3   0   8 499.845 38.0072   7
   3   0  -8 475.175 38.0571   7
   3   0  -8 512.273 37.7155   2
   3   0  -7 3.67094 2.78617   8
  -3   0   7-1.65612 4.47644   7
   3   0  -7 0.76866 4.21797   2
  -3   0   6 2596.88 185.944   7
   3   0  -6 2840.70 183.965   8
   3   0  -6 2976.52 186.466   2
   3   0  -5-1.35419 3.18637   2
   3   0  -4 1578.49 107.273   2
  -3   0   3 0.75425 2.75433   4
   3   0  -3 5.45499 3.12862   2
   3   0  -2 2788.52 174.789   2
  -3   0   2 2509.60 174.562   4
   3   0  -1 0.50678 1.78434   7
  -3   0   1 0.55973 2.10672   4
  -3   0   0 411.618 30.3484   6
  -3   0  -1-0.52142 1.96246   5
   3   0   1 2.96715 2.67775   5
  -3   0  -1-0.65847 2.39950   6
   3   0   1 2.43781 2.63526   2
   3   0   2 160.497 13.2525   2
  -3   0  -2 147.623 13.5510   5
   3   0   2 169.780 14.6598   5
   3   0   3-0.97516 4.40064   5
   3   0   3 0.91421 2.61705   2
  -3   0  -3 2.67918 2.67465   5
  -3   0  -4 431.416 33.9306   5
   3   0   4 427.469 32.2337   2
  -3   0  -5-0.91526 3.33507   5
   3   0   5 0.48586 2.66545   2
  -3   0  -6 3030.50 198.594   3
  -3   0  -6 2878.72 206.628   1
  -3   0  -6 3141.30 205.883   5
   3   0   6 3316.32 201.461   2
  -3   0  -7-2.91128 5.81037   1
  -3   0  -7 0.33394 1.45682   3
  -3   0  -7 1.41274 5.48025   5
  -3   0  -8 1281.78 83.4652   3
  -3   0  -8 1193.25 91.9481   1
  -3   0  -8 1263.02 93.4613   5
  -3   0  -9 1.68428 7.26339   1
  -3   0  -9 2.36350 2.52188   3
  -3   0  -9 4.03254 8.04972   5
  -3   0 -10 825.218 78.1728   5
  -3   0 -10 886.653 76.4441   1
  -3   0 -10 1033.11 68.2580   3
   3   0  10 1098.55 69.4670   7
  -3   0 -11 12.4924 11.9866   5
  -3   0 -11 2.54107 3.42963   3
   3   0  11-3.14084 7.23921   8
   3   0  11 0.99909 4.04468   7
  -3   0 -11 5.71556 10.1404   1
   3   0  12 31.6769 10.2809   8
  -3   0 -12 7.95004 13.5140   5
  -3   0 -12 28.1216 10.9645   1
  -3   0 -12 23.2416 5.26101   3
   3   0  13-1.67578 7.88349   8
  -3   0 -13-5.46276 11.2016   5
  -3   0 -13-1.07355 4.22589   3
  -3   0 -13 2.10450 10.2886   1
   3   0  14 50.0045 12.7814   8
  -3   0 -14 43.9858 14.5303   1
  -3   0 -14 49.7033 7.87010   3
  -3   0 -15 2.25825 11.8304   1
  -3   0 -16 219.154 28.5516   1
  -3   0 -17-24.0106 14.3707   1
  -3   0 -18 138.203 24.6497   1
   3   1 -19 5.09187 11.6300   3
   3  -1 -18 71.4242 17.2026   3
   3   1 -18 53.8423 14.7831   3
   3   1 -17 1.66076 10.4821   3
   3  -1 -17 1.68156 10.6134   3
   3   1 -16 19.5866 10.7933   3
   3  -1 -16 11.1826 10.0169   3
   3  -1 -15 44.3960 11.0145   3
   3   1 -15 26.0951 10.9781   3
   3   1 -14 103.409 15.9990   3
   3  -1 -14 101.137 15.3440   3
   3  -1 -13 13.9483 8.73075   3
   3   1 -13 6.41279 9.32229   3
   3  -1 -12 894.821 66.6444   3
   3  -1 -11 1.26324 6.06324   3
   3  -1 -11 7.60688 7.15942   2
   3   1 -11 1.78556 5.31588   2
   3  -1 -10 1597.94 103.484   7
   3  -1 -10 1613.18 104.483   2
   3   1 -10 1453.42 102.130   2
   3  -1 -10 1311.72 103.205   3
   3   1  -9 2.42892 4.52470   2
   3  -1  -9 2.17018 5.87858   2
   3  -1  -9 11.5257 5.28469   7
   3  -1  -9 11.2882 6.38508   3
   3  -1  -8 1402.04 95.0374   2
   3  -1  -8 1335.31 94.0500   7
  -3  -1   7 104.615 11.7038   7
   3   1  -7 88.2177 11.1195   7
   3  -1  -7 85.4975 11.4121   2
   3  -1  -6 481.289 34.9269   2
   3  -1  -6 474.103 33.9442   8
  -3  -1   6 394.689 33.7402   7
   3  -1  -5 231.267 19.3100   2
   3  -1  -5 199.217 18.6310   8
   3  -1  -5 208.041 18.3107   7
  -3  -1   5 224.945 18.8964   7
   3  -1  -4 584.275 40.6747   2
  -3  -1   4 519.669 39.5372   7
   3  -1  -4 551.011 40.6918   8
   3  -1  -3 194.110 16.7600   2
  -3   1   3 211.171 17.2780   4
  -3  -1   3 182.924 15.9221   7
   3  -1  -3 179.027 16.8555   8
   3  -1  -2 1261.18 84.8273   2
   3  -1  -2 1256.07 84.1719   5
  -3   1   2 1215.20 84.2272   4
   3  -1  -1 16.4905 3.70515   6
  -3   1   1 29.8425 4.89254   2
  -3   1   1 16.5952 3.65685   4
   3   1  -1 21.8490 4.09063   4
   3   1  -1 15.0915 3.48618   7
  -3   1   0 7004.01 410.813   2
   3   1   0 6659.97 409.654   4
   3   1   0 6459.60 409.138   7
  -3  -1   0 6368.03 410.019   6
   3  -1   0 5705.66 407.998   3
  -3   1   0 6049.72 410.110   5
   3  -1   0 6512.77 410.341   6
   3   1   1 2.79257 2.41187   5
  -3   1  -1 2.67493 2.68142   5
   3  -1   1 4.58658 1.37606   3
   3   1   1 2.28895 2.04623   7
  -3  -1  -1 3.26548 2.82725   6
  -3   1  -1 6.18586 3.03477   2
   3  -1   1 6.91936 3.30489   2
   3   1   2 2653.59 168.013   5
  -3   1  -2 2539.38 169.445   5
   3  -1   2 2750.42 171.599   5
   3  -1   2 2547.08 164.556   3
  -3   1  -2 2545.16 168.200   2
   3  -1   2 2522.13 168.350   2
  -3  -1  -2 2508.54 170.199   1
   3  -1   2 2560.10 169.408   1
   3   1   2 2495.84 165.131   3
  -3  -1  -3 6.51149 2.30956   5
  -3   1  -3 8.70038 3.86070   5
   3  -1   3 15.9647 6.97433   5
   3   1   3 1.27916 3.09489   5
  -3  -1  -3 1.00599 3.43650   1
   3  -1   3 10.4974 5.05565   1
  -3   1  -3 10.4079 3.19782   2
   3  -1   3 7.08796 3.23337   2
   3   1   3 6.17241 1.30024   3
   3   1   4 2688.30 172.481   3
  -3  -1  -4 2559.57 175.248   5
   3   1   4 3398.23 182.030   5
  -3   1  -4 2623.41 178.958   5
  -3   1  -4 2738.40 175.581   2
   3  -1   4 2702.05 176.391   2
   3   1   4 2573.87 174.408   2
  -3  -1  -4 2071.68 178.092   1
   3  -1   4 2803.32 178.440   1
   3  -1   4 2769.43 179.520   8
   3   1   5 74.8873 6.20062   3
  -3  -1  -5 82.6738 8.89676   5
  -3   1  -5 63.3231 10.6567   1
  -3   1  -5 84.9191 11.8895   5
  -3   1  -5 88.9992 8.38936   2
   3   1   5 83.0240 7.41692   2
  -3  -1  -5 77.0913 6.10165   3
   3  -1   5 80.3826 11.1387   8
   3  -1   5 80.2497 9.31269   2
  -3   1  -6 105.648 15.8470   5
  -3   1  -6 108.102 14.0858   1
   3   1   6 103.632 9.20665   2
  -3  -1  -6 115.952 8.27924   3
  -3  -1  -6 88.7056 10.6378   5
  -3  -1  -7 89.6589 10.7231   5
  -3   1  -7 79.4730 15.4445   5
   3   1   7 89.1063 7.69216   2
  -3   1  -7 84.0076 6.48112   3
  -3  -1  -7 79.5914 6.98683   3
  -3   1  -7 99.1072 13.6789   1
  -3  -1  -7 78.9218 13.0442   1
  -3  -1  -8 188.883 19.5676   5
  -3   1  -8 186.536 25.8100   5
   3   1   8 219.142 15.1729   7
  -3   1  -8 204.561 14.7987   3
  -3  -1  -8 208.977 15.2362   3
  -3   1  -8 214.518 22.1669   1
  -3  -1  -8 156.632 20.9077   1
  -3   1  -9 33.7025 15.5150   5
  -3  -1  -9 59.1029 10.3386   5
  -3   1  -9 39.5315 10.7954   1
  -3  -1  -9 43.7515 12.2995   1
   3   1   9 55.6805 5.34611   7
  -3   1  -9 53.1240 5.31101   3
  -3  -1  -9 42.3515 5.42282   3
  -3  -1 -10 573.824 47.4022   5
  -3   1 -10 443.459 54.7476   5
   3  -1  10 612.802 49.3677   8
  -3   1 -10 555.601 48.3562   1
  -3  -1 -10 569.249 49.8452   1
   3   1  10 549.403 39.5705   7
  -3  -1 -10 618.601 40.7734   3
  -3   1 -10 645.025 40.5158   3
  -3  -1 -11 70.7583 14.7128   5
  -3  -1 -11 85.5079 16.0043   1
  -3   1 -11 99.7745 16.0500   1
   3  -1  11 89.4675 15.4815   8
   3   1  11 109.482 14.3658   8
   3   1  11 83.0547 7.88986   7
   3  -1  11 109.586 11.6656   7
  -3   1 -11 106.266 9.16376   3
  -3  -1 -11 112.255 9.61673   3
   3   1  12 944.405 66.9715   8
   3  -1  12 856.431 68.0147   8
  -3   1 -12 846.596 68.5279   1
  -3  -1 -12 894.034 70.5707   1
  -3  -1 -12 942.760 60.1527   3
  -3   1 -12 948.713 60.0145   3
  -3  -1 -12 720.485 66.0950   5
  -3  -1 -13 3.55883 9.47058   5
  -3   1 -13-3.73328 14.9020   5
   3   1  13-3.11937 7.76506   8
  -3   1 -13-1.96939 9.80471   1
  -3  -1 -13-4.46723 12.0722   1
   3  -1  13-6.88656 9.30515   8
  -3  -1 -13-0.57202 4.13434   3
  -3   1 -13 2.04252 4.32429   3
   3   1  14 348.537 33.2432   8
   3  -1  14 354.631 33.9098   8
  -3   1 -14 417.664 37.9380   1
  -3  -1 -14 340.595 37.1961   1
  -3   1 -14 438.016 28.0878   3
  -3  -1 -14 420.654 28.6094   3
  -3   1 -15 40.6909 14.3019   1
  -3  -1 -15 87.4719 18.7992   1
  -3   1 -16 220.153 27.4538   1
  -3  -1 -16 190.477 28.2602   1
  -3  -1 -17-2.55872 14.8414   1
  -3   1 -17 13.6954 13.4131   1
  -3  -1 -18 13.0097 14.6942   1
  -3   1 -18 2.31995 12.5459   1
   3   2 -19-1.69173 11.1420   3
   3   2 -18 146.035 21.5496   3
   3  -2 -18 151.210 21.2082   3
   3  -2 -17 9.61087 11.7201   3
   3   2 -17-6.82385 11.2352   3
   3  -2 -16 340.011 34.3672   3
   3   2 -16 377.931 34.9450   3
   3   2 -15 15.7952 10.7389   3
   3  -2 -15 12.4903 9.89500   3
   3  -2 -14 285.824 27.5812   3
   3  -2 -13 113.998 15.9519   3
   3  -2 -12 114.651 14.9002   3
   3  -2 -11 22.8964 7.84915   3
   3   2 -11 17.4939 7.06782   2
   3  -2 -11 17.2349 7.17775   7
   3  -2 -11 7.80737 9.00262   2
   3  -2 -10 183.697 19.3616   3
   3  -2 -10 204.348 21.9252   2
   3  -2 -10 205.197 19.4074   7
   3  -2  -9 43.9717 7.61270   7
   3   2  -9 30.5461 5.78683   8
   3  -2  -9 28.5436 8.78765   2
   3  -2  -9 43.0535 8.16438   3
   3  -2  -8 445.426 33.2977   7
   3  -2  -8 387.029 34.6578   2
  -3  -2   7 118.286 14.0545   7
   3  -2  -7 127.745 15.3253   2
   3  -2  -6 2845.08 198.132   3
   3  -2  -6 2979.66 200.634   2
  -3  -2   6 3199.88 199.367   7
   3  -2  -5 36.8603 6.03189   5
   3  -2  -5 24.1747 7.57377   8
   3  -2  -5 29.7093 5.66173   3
  -3  -2   5 23.7406 5.41847   7
   3  -2  -5 39.2398 7.80889   2
  -3   2   5 23.8115 5.23624   2
   3  -2  -4 2510.37 177.002   8
   3  -2  -4 2861.87 176.102   2
  -3   2   4 2385.32 173.813   2
   3  -2  -4 2671.08 172.929   3
   3  -2  -4 2638.95 173.466   5
  -3  -2   4 2658.49 173.493   7
   3  -2  -3 449.479 34.9917   8
   3  -2  -3 432.008 32.9197   2
  -3   2   3 425.997 31.3243   4
   3  -2  -3 408.135 29.7924   3
   3  -2  -3 439.067 31.1618   5
  -3  -2   3 350.619 30.0466   7
   3  -2  -2 1835.49 123.667   8
   3  -2  -2 1677.04 120.747   2
  -3   2   2 1731.55 118.897   4
   3  -2  -2 1844.81 117.802   3
   3   2  -2 1828.10 119.096   7
   3  -2  -2 1754.09 119.721   5
   3  -2  -1 408.394 33.4467   8
  -3   2   1 386.536 30.8254   2
   3   2  -1 405.040 29.6282   1
   3   2  -1 404.067 29.3018   4
   3  -2  -1 402.602 29.3689   4
  -3   2   1 416.174 29.7099   4
   3   2  -1 397.670 29.6369   6
   3  -2  -1 397.791 29.4275   6
   3  -2  -1 392.724 28.0107   3
   3   2  -1 418.084 29.4891   7
  -3  -2   1 391.133 29.0402   7
  -3  -2   0 271.795 19.5303   7
   3   2   0 269.024 19.7802   7
   3   2   0 268.471 20.7889   6
   3  -2   0 262.043 20.6823   6
  -3   2   0 222.180 20.8862   5
   3   2   0 271.287 21.0060   1
   3   2   0 263.848 20.0644   4
   3  -2   0 254.157 19.8898   4
   3  -2   0 273.443 24.3125   8
   3  -2   0 272.560 18.7004   3
  -3  -2   0 241.820 20.1862   6
  -3   2   0 235.124 20.0418   6
  -3   2   0 252.295 21.7114   2
   3  -2   1 269.764 23.2545   2
  -3   2  -1 278.384 23.2755   2
  -3   2  -1 292.447 19.8308   3
   3  -2   1 268.531 19.0067   3
  -3  -2  -1 290.061 20.3990   7
   3   2   1 277.458 20.4537   7
  -3  -2  -1 284.042 23.1321   1
   3   2   1 304.781 22.9408   1
  -3   2  -1 236.877 21.5563   6
  -3  -2  -1 278.021 22.0920   6
  -3   2  -1 273.442 23.3377   5
   3   2   2 295.767 20.6649   5
  -3   2  -2 252.506 23.2531   5
  -3   2  -2 267.238 22.9243   2
   3  -2   2 208.953 21.8609   2
  -3   2  -2 271.333 18.8873   3
   3  -2   2 276.328 18.5103   3
   3   2   2 275.256 19.8237   7
  -3  -2  -2 252.217 23.1066   1
   3   2   2 293.294 19.2004   3
   3   2   3 229.337 16.1094   3
  -3   2  -3 227.540 15.5290   3
   3   2   3 239.386 18.0838   5
  -3   2  -3 210.670 21.4042   5
  -3   2  -3 224.619 19.9983   2
   3  -2   3 221.904 20.1604   2
   3   2   3 229.002 16.5419   7
  -3  -2  -3 216.064 21.1810   1
   3  -2   3 235.075 20.0933   1
   3   2   4 1333.52 87.8155   7
   3   2   4 1326.66 87.8663   3
   3  -2   4 1180.47 95.3460   8
   3   2   4 1568.98 92.0750   5
  -3   2  -4 1311.96 96.4854   5
   3  -2   4 1577.24 94.2150   2
  -3   2  -4 1300.58 92.1013   2
   3  -2   4 1368.28 92.9077   1
  -3  -2  -4 1263.45 94.7338   1
  -3  -2  -4 1316.21 88.1650   3
  -3  -2  -5 15.5802 3.25993   5
  -3   2  -5 9.50082 8.99470   5
  -3  -2  -5 21.1199 7.41519   1
   3  -2   5 13.3833 5.56180   1
  -3   2  -5 17.0335 4.82603   2
   3   2   5 16.0509 2.69588   3
  -3  -2  -5 14.9522 2.62446   3
  -3   2  -6 3157.10 218.754   5
  -3  -2  -6 3218.24 205.734   5
  -3   2  -6 3152.45 207.611   2
   3   2   6 3114.91 204.456   3
  -3   2  -6 3032.82 203.717   3
  -3   2  -6 3240.00 203.273   3
  -3  -2  -6 3054.20 204.396   3
  -3  -2  -7 81.5844 7.30806   3
  -3   2  -7 102.424 9.65041   2
   3   2   7 74.7481 7.02506   2
  -3   2  -7 66.0722 17.0150   5
  -3   2  -7 82.2905 6.80879   3
   3   2   7 82.1451 7.79008   3
  -3   2  -7 88.0507 13.0986   1
  -3  -2  -7 83.2374 8.51304   5
  -3   2  -8 1085.06 70.9158   3
  -3  -2  -8 1103.05 73.3082   5
  -3   2  -8 1170.46 72.7926   2
   3   2   8 1075.40 70.2556   2
  -3  -2  -8 1087.11 71.3571   3
  -3   2  -8 978.403 77.8891   1
  -3  -2  -8 883.243 78.6981   1
   3  -2   9 122.722 18.9669   8
  -3   2  -9 150.989 18.6016   1
  -3  -2  -9 154.724 20.5823   1
  -3   2  -9 137.451 27.1656   5
  -3  -2  -9 154.476 14.4384   5
  -3  -2  -9 165.190 13.0903   3
  -3   2  -9 159.555 12.4563   3
   3  -2  10 534.834 47.0036   8
  -3   2 -10 578.282 38.1958   3
  -3  -2 -10 564.765 38.5970   3
  -3  -2 -10 581.619 40.7308   5
  -3   2 -10 488.327 45.0956   1
  -3  -2 -10 570.216 47.9782   1
  -3  -2 -11 18.2329 4.90815   3
  -3  -2 -11 14.5247 5.62487   5
  -3   2 -11 25.5463 17.0325   5
  -3   2 -11 15.4297 9.60877   1
  -3  -2 -11 10.3470 10.5451   1
   3  -2  11 19.0986 9.23126   8
  -3   2 -11 19.9523 4.96404   3
  -3  -2 -12 5.22323 4.31424   3
  -3  -2 -12-1.83186 5.91861   5
  -3   2 -12 13.4275 19.3007   5
  -3   2 -12 5.41354 8.32492   1
  -3  -2 -12 4.38721 10.3253   1
  -3   2 -12 12.7342 5.40294   3
   3  -2  12 1.87454 7.69583   8
   3   2  12 10.6108 7.06810   8
   3   2  13 33.8893 10.1046   8
  -3   2 -13 20.7744 11.2592   1
  -3  -2 -13 62.7379 17.6824   1
  -3   2 -13 47.1216 7.00124   3
  -3  -2 -13 45.8768 7.26610   3
   3  -2  13 44.6074 12.2687   8
  -3   2 -14 4.61405 18.9717   5
   3   2  14 5.86407 8.61188   8
  -3   2 -14 29.4887 12.6190   1
  -3  -2 -14 39.2361 14.1005   1
  -3  -2 -14 24.2636 6.88413   3
  -3   2 -14 24.0779 5.80356   3
  -3   2 -15 13.7303 19.7585   5
  -3  -2 -15 5.17015 13.7955   1
  -3   2 -15 26.4385 13.2952   1
  -3  -2 -16 98.8079 22.6376   1
  -3   2 -16 204.784 24.4891   1
  -3  -2 -17-2.74857 14.4033   1
  -3   2 -17-8.53766 12.7066   1
  -3  -2 -18 128.503 25.5755   1
  -3   2 -18 125.856 22.7393   1
   3  -3 -18 19.7207 10.7286   3
   3   3 -18 34.9432 13.2543   3
   3  -3 -17 32.1796 13.0023   3
   3   3 -17 30.5031 12.5682   3
   3  -3 -16 47.2056 13.2007   3
   3   3 -16 26.0763 12.4844   3
   3  -3 -15 107.317 17.6397   3
   3  -3 -14 153.746 19.8060   3
   3  -3 -13 151.565 18.6350   3
   3  -3 -12 524.062 41.8015   3
   3  -3 -12 500.872 40.2992   7
   3  -3 -11 55.2287 11.0918   3
   3  -3 -11 88.6842 11.6123   7
   3   3 -10 670.454 46.2358   8
   3  -3 -10 735.069 48.5335   7
   3  -3 -10 704.798 49.0475   3
   3  -3  -9 62.1520 9.47889   3
   3  -3  -9 36.5923 12.3744   2
   3  -3  -9 69.8806 9.59097   7
   3   3  -9 35.2317 7.91792   8
   3  -3  -9 51.8430 8.37241   5
   3  -3  -8 684.979 49.1449   7
   3  -3  -8 646.991 53.5284   2
   3  -3  -8 657.195 48.3391   5
  -3   3   7 645.780 42.2751   2
   3  -3  -7 586.347 41.1901   5
   3  -3  -6 288.936 28.7825   2
  -3   3   6 340.868 26.2091   2
   3  -3  -6 306.764 25.1436   5
  -3  -3   6 314.879 26.7191   7
   3  -3  -6 320.876 25.3894   3
  -3   3   5 547.300 44.2250   8
  -3   3   5 686.292 45.9411   2
   3  -3  -5 697.131 49.4031   2
   3  -3  -5 669.353 45.0392   5
   3  -3  -5 547.712 43.6554   3
  -3  -3   5 630.503 45.5697   7
  -3  -3   4 61.2299 8.59893   7
   3  -3  -4 78.5757 9.33875   5
   3  -3  -4 75.9368 12.2988   8
  -3   3   4 73.1225 9.12194   2
  -3   3   4 80.0376 9.82997   8
   3  -3  -4 60.8218 7.28131   3
  -3   3   3 490.554 38.8449   4
  -3  -3   3 530.812 39.7454   4
   3  -3  -3 544.844 38.0720   3
   3  -3  -3 550.157 42.8209   2
   3  -3  -3 627.266 46.5454   8
  -3   3   3 484.874 40.6651   8
   3  -3  -3 594.657 40.6382   5
   3  -3  -2 509.706 40.4836   5
   3  -3  -2 580.871 46.4175   8
  -3   3   2 515.441 42.0774   8
  -3  -3   2 529.251 39.1943   4
  -3   3   2 525.752 38.7976   4
  -3   3   2 545.042 38.5130   3
   3  -3  -2 595.491 38.5250   3
   3  -3  -2 584.227 38.8818   6
   3   3  -2 508.264 37.9985   1
   3   3  -1 819.464 57.5311   6
   3  -3  -1 820.866 57.2917   6
   3   3  -1 815.177 57.4801   1
   3  -3  -1 928.040 60.6823   5
   3  -3  -1 847.476 57.3969   4
   3   3  -1 806.542 57.0591   4
  -3   3   1 905.970 56.5831   3
   3  -3  -1 770.682 55.7492   3
  -3   3   1 768.178 60.2148   2
   3  -3  -1 882.432 65.4924   8
  -3   3   1 774.401 61.7637   8
  -3  -3   1 906.392 57.7021   7
  -3  -3   0 4890.67 301.209   7
  -3   3   0 4583.56 301.577   6
  -3  -3   0 4817.50 301.825   6
  -3   3   0 3670.28 303.363   5
  -3  -3   0 4619.04 302.659   1
   3  -3   0 4633.44 301.234   4
   3   3   0 4831.98 301.435   4
   3  -3   0 4633.15 310.550   8
  -3   3   0 4737.20 305.706   2
   3  -3   0 4472.44 299.687   3
  -3   3   0 4759.83 300.151   3
  -3   3  -1 261.845 21.5655   6
  -3  -3  -1 281.118 21.7127   6
  -3   3  -1 228.242 23.0779   5
  -3   3  -1 262.518 25.7625   8
   3   3   1 277.113 19.9123   3
  -3   3  -1 295.731 25.0983   2
  -3  -3  -1 277.565 20.1659   7
   3  -3   1 266.070 19.0757   3
  -3   3  -1 284.686 19.4097   3
  -3  -3  -1 261.921 23.0920   1
  -3   3  -2 2858.44 172.752   3
  -3  -3  -2 2315.21 177.348   1
  -3   3  -2 2426.51 179.016   5
  -3   3  -2 2577.62 179.016   2
  -3  -3  -2 2636.95 173.144   7
   3   3   2 2511.47 172.797   3
   3  -3   2 2715.86 172.320   3
  -3   3  -2 2328.65 179.892   8
   3  -3   2 3167.28 181.002   2
   3   3   3 566.439 38.3592   5
  -3   3  -3 574.161 46.1935   5
  -3   3  -3 547.751 43.7263   2
   3  -3   3 578.637 37.0199   3
   3   3   3 533.288 37.5156   3
  -3  -3  -3 519.699 43.0546   1
  -3   3  -3 546.709 36.9372   3
  -3   3  -4 1028.15 72.3212   5
   3   3   4 932.612 60.6471   5
  -3   3  -4 908.987 65.8784   2
  -3  -3  -4 833.830 59.7959   3
   3  -3   4 882.691 63.5522   1
   3   3   4 878.424 59.4244   3
  -3   3  -4 911.414 58.6881   3
  -3   3  -5 312.949 33.2918   5
  -3  -3  -5 268.218 21.3572   3
  -3   3  -5 307.910 20.3548   3
  -3   3  -5 255.573 25.8091   2
   3  -3   5 352.432 26.4743   1
   3   3   5 309.031 21.2620   3
  -3   3  -6-2.94487 9.99365   5
   3   3   6 5.83421 3.04299   3
  -3   3  -6 3.24488 1.61127   3
  -3  -3  -6 6.19697 2.62664   3
  -3   3  -6 9.11760 5.36878   2
   3   3   7 371.773 24.6554   3
  -3   3  -7 280.168 27.8483   2
  -3   3  -7 337.801 40.3213   5
  -3   3  -7 333.811 23.2927   3
  -3  -3  -7 346.128 24.5382   3
  -3   3  -8 4.15177 2.27165   3
  -3   3  -8-0.92941 4.94926   2
  -3  -3  -8 4.55116 2.83870   3
   3  -3   8-6.21709 6.75616   8
   3   3   8 1.34222 3.50045   3
  -3  -3  -9 370.216 24.5974   3
  -3   3  -9 380.799 26.5655   2
   3  -3   9 340.852 33.5687   8
  -3  -3 -10 332.928 20.9850   5
  -3   3 -10 269.532 27.8629   1
  -3   3 -10 309.676 22.8670   2
  -3  -3 -10 319.161 22.8862   3
  -3   3 -10 300.994 22.7363   3
   3  -3  10 248.228 29.8471   8
  -3   3 -11 55.6450 7.51926   3
  -3  -3 -11 56.8004 7.99852   3
  -3  -3 -11 74.6871 6.30954   5
   3  -3  11 58.7537 14.0735   8
  -3   3 -11 58.5054 12.8849   1
   3  -3  12 728.269 59.2351   8
  -3  -3 -12 812.589 51.4039   3
  -3   3 -12 774.362 58.5251   1
  -3   3 -12 762.812 50.4007   3
  -3  -3 -13 3.46238 5.09082   3
  -3   3 -13 5.35769 18.8612   5
  -3   3 -13 0.58042 4.57150   3
  -3   3 -13-1.78296 10.2049   1
  -3  -3 -13 24.4813 15.4517   1
   3   3  13 2.62660 7.31158   8
  -3  -3 -14 329.584 24.4713   3
   3   3  14 303.571 28.0302   8
  -3   3 -14 343.029 31.9059   1
  -3  -3 -14 288.200 34.4879   1
  -3  -3 -15 48.5395 17.1768   1
  -3  -3 -15 46.6051 8.74164   3
  -3  -3 -16 184.565 28.8728   1
  -3  -3 -17 32.2101 17.3293   1
   3  -4 -18 112.036 18.3560   3
   3   4 -18 90.4327 18.1337   3
   3  -4 -17 1.63553 10.5671   3
   3   4 -17 21.1415 12.8010   3
   3  -4 -16 266.356 27.6935   3
   3  -4 -15 16.3982 9.36320   3
   3  -4 -14 66.2969 13.0004   3
   3  -4 -13 230.384 21.6786   7
   3  -4 -13 191.877 22.0952   3
   3  -4 -12 90.1409 12.2438   7
   3  -4 -12 70.6519 13.4974   3
   3  -4 -11 269.001 21.3563   7
   3  -4 -11 273.505 23.8643   3
   3   4 -10 69.2607 11.7677   8
   3  -4 -10 65.2797 10.8027   5
   3  -4 -10 91.5704 11.8463   7
   3  -4  -9 431.621 31.7697   7
   3  -4  -9 434.983 33.6844   3
   3  -4  -8 351.993 29.3312   5
   3  -4  -8 398.977 30.4496   7
  -3   4   8 364.410 29.8625   2
  -3   4   7 130.001 13.3659   8
  -3   4   7 143.758 14.3263   2
   3  -4  -7 165.092 14.6701   5
   3  -4  -7 184.956 15.3926   7
  -3   4   6 1351.95 95.4015   8
  -3   4   6 1379.65 95.6008   2
   3  -4  -6 1183.23 100.497   2
   3  -4  -6 1514.86 95.4197   3
   3  -4  -6 1372.03 94.7102   5
   3  -4  -5 202.248 18.7001   5
   3  -4  -5 260.251 25.8533   2
  -3   4   5 167.251 19.2933   8
  -3   4   5 190.592 19.2403   2
  -3  -4   5 182.201 18.5582   7
   3  -4  -5 237.001 18.2459   3
   3  -4  -4 1232.00 87.1478   5
   3  -4  -4 1249.73 92.6993   2
  -3   4   4 1097.76 85.5731   4
  -3  -4   4 1396.45 88.1594   4
  -3   4   4 1354.87 90.4898   8
  -3   4   4 1327.62 89.0661   2
   3  -4  -4 1305.38 84.9463   3
   3   4  -4 1225.77 82.7984   1
  -3   4   3 333.705 23.5286   5
   3  -4  -3 335.243 24.6155   5
  -3   4   3 289.039 21.8397   4
  -3  -4   3 347.634 23.4801   4
  -3   4   3 365.305 28.7241   8
  -3   4   3 273.422 24.8492   2
   3  -4  -3 315.190 21.1036   3
   3  -4  -2 1233.16 80.3884   6
   3   4  -2 1327.99 81.2238   6
  -3   4   2 1116.16 82.3860   5
   3  -4  -2 1283.43 84.6287   5
  -3  -4   2 1191.94 81.0224   4
  -3   4   2 1153.50 80.4718   4
  -3  -4   2 1199.30 81.6594   7
  -3   4   2 1193.31 87.6377   8
   3  -4  -2 1272.79 91.4658   8
  -3   4   2 1110.29 79.8705   3
   3  -4  -2 1147.77 79.5687   3
   3  -4  -1 1125.47 76.7833   6
   3   4  -1 1204.64 77.3492   6
  -3  -4   1 1138.31 77.1666   1
   3  -4  -1 1176.23 82.2019   5
   3   4  -1 1103.00 76.5057   4
   3  -4  -1 1176.48 76.9881   4
   3  -4  -1 1182.06 75.7497   3
  -3   4   1 1050.45 75.7112   3
  -3   4   1 1095.11 81.9997   2
  -3  -4   1 1070.62 77.2902   7
   3  -4  -1 1173.60 87.7693   8
  -3   4   1 1223.31 85.2406   8
  -3   4   0 74.2241 7.73303   6
  -3  -4   0 74.5964 7.71598   6
  -3   4   0 65.2533 11.4692   2
  -3  -4   0 65.3457 7.60997   7
   3  -4   0 70.7330 7.45104   4
   3   4   0 68.7608 7.51422   4
  -3   4   0 68.6903 6.86050   3
   3  -4   0 61.9744 6.38870   3
  -3  -4   0 67.5429 8.80530   1
  -3  -4  -1 988.065 64.7230   7
  -3   4  -1 865.586 65.2935   6
  -3  -4  -1 954.985 65.5305   6
  -3  -4  -1 1042.19 68.4451   1
  -3   4  -1 814.788 69.1082   5
  -3   4  -1 997.173 71.6538   2
   3   4   1 1102.45 64.5755   3
   3  -4   1 875.011 63.2707   3
  -3   4  -1 979.924 63.6197   3
  -3   4  -1 882.366 73.3506   8
  -3   4  -2 55.2166 5.44761   3
  -3  -4  -2 56.3062 6.18176   7
  -3   4  -2 42.2126 10.4127   5
   3   4   2 60.4090 6.00121   3
   3  -4   2 51.3367 5.21153   3
  -3   4  -2 44.4595 9.47297   2
  -3   4  -2 38.5684 11.0177   8
  -3   4  -3 1087.06 82.6028   5
  -3   4  -3 1122.62 79.2035   2
  -3   4  -3 1083.60 69.8690   3
   3  -4   3 1079.13 69.9213   3
   3   4   3 1023.02 70.4018   3
  -3   4  -3 904.652 79.9722   8
  -3  -4  -3 1040.96 70.0716   7
   3   4   4 471.272 29.1377   3
  -3   4  -4 413.975 28.1344   3
   3   4   4 407.974 28.7093   5
  -3   4  -4 489.490 43.1580   5
  -3   4  -4 406.577 36.3177   2
  -3  -4  -4 376.606 29.2343   3
   3  -4   4 384.603 32.1705   1
  -3   4  -4 313.609 35.8739   8
   3  -4   5 390.599 28.4484   1
  -3   4  -5 364.730 23.4965   3
  -3  -4  -5 311.726 24.5122   3
  -3   4  -5 282.975 31.9004   8
   3   4   5 384.801 24.4673   3
  -3   4  -5 346.230 32.0207   2
   3  -4   6 1386.29 107.349   8
   3   4   6 1594.27 95.7595   3
  -3   4  -6 1314.21 103.175   2
   3  -4   6 1616.88 100.642   1
  -3  -4  -6 1360.39 95.7894   3
  -3   4  -6 1500.19 94.6390   3
  -3   4  -7 8.38968 2.58089   3
  -3  -4  -7 7.81926 3.33152   3
   3  -4   7 6.77805 8.52764   8
  -3   4  -7 8.22301 16.8739   5
  -3   4  -7 13.7867 7.23551   2
   3   4   7 17.8070 4.08100   3
  -3   4  -8 618.825 70.9473   5
  -3  -4  -8 739.752 49.6848   3
  -3   4  -8 712.445 48.0851   3
  -3   4  -8 620.912 54.5973   2
   3   4   8 751.544 49.5662   3
   3  -4   8 691.331 60.1065   8
  -3   4  -9 347.014 55.0876   5
  -3   4  -9 398.013 38.0297   2
  -3   4  -9 503.143 32.8110   3
  -3  -4  -9 444.763 34.0984   3
   3   4   9 504.575 34.6559   3
   3  -4   9 483.965 44.4843   8
  -3  -4 -10 601.106 39.7068   3
  -3   4 -10 587.986 37.6335   3
  -3   4 -10 524.059 41.8888   2
   3  -4  10 531.821 48.7097   8
  -3  -4 -11 371.725 26.6921   3
  -3   4 -11 367.299 24.4429   3
   3  -4  11 367.357 35.2615   8
  -3   4 -11 361.845 27.2158   2
  -3   4 -12-6.02125 21.1969   5
  -3  -4 -12 5.69732 5.23469   3
  -3   4 -12-0.65361 5.07259   3
  -3  -4 -13 240.439 20.1139   3
  -3   4 -13 276.143 19.7048   3
  -3  -4 -14 9.79920 6.53333   3
  -3   4 -14-6.07684 23.5770   5
  -3  -4 -14 21.8731 16.6764   1
   3   4  14 1.30876 7.99155   8
  -3  -4 -15 115.637 12.9828   3
  -3  -4 -15 85.5611 21.0990   1
  -3  -4 -16 83.4640 21.9334   1
  -3   4 -16 17.3345 23.8889   5
  -3  -4 -17 9.30585 15.4545   1
   3   5 -18 11.6852 12.7168   3
   3  -5 -17 108.726 17.9697   3
   3  -5 -16-1.58728 9.79323   3
   3  -5 -15 216.635 23.8691   3
   3  -5 -14 53.6366 11.2643   7
   3  -5 -14 50.6069 12.5519   3
   3  -5 -13 131.112 17.4075   3
   3  -5 -13 156.264 16.9091   7
   3  -5 -12 387.812 34.4620   3
   3  -5 -12 440.927 33.9490   7
   3   5 -12 400.925 29.9133   1
   3   5 -11 61.0265 7.71598   1
   3  -5 -11 62.1199 11.4263   3
   3  -5 -11 77.7067 11.3049   7
   3   5 -10 512.319 51.4576   8
  -3   5  10 778.128 51.2782   2
   3   5 -10 695.436 46.1670   1
   3  -5 -10 770.507 51.4077   7
   3  -5 -10 619.357 50.2615   5
   3  -5 -10 658.644 50.9573   3
   3   5  -9 304.084 21.7644   1
  -3   5   9 359.187 27.3503   2
   3  -5  -9 330.095 26.9545   7
  -3   5   9 269.910 24.5714   8
   3  -5  -9 346.126 27.4922   5
  -3   5   8 337.729 28.8467   2
   3  -5  -8 364.315 29.0335   7
   3  -5  -8 354.254 28.9866   5
  -3   5   8 320.043 28.1366   8
  -3   5   7 998.377 72.3803   2
   3  -5  -7 1043.79 71.7193   5
  -3   5   7 954.194 72.3922   8
   3  -5  -6 10.1288 5.83367   5
  -3   5   6 10.0089 6.03780   2
   3  -5  -6 5.95903 4.07904   3
   3  -5  -5 809.794 60.3148   5
  -3   5   5 903.495 62.9620   2
   3  -5  -5 792.582 57.8531   3
  -3   5   5 857.465 64.2980   8
  -3   5   4 227.415 21.1785   5
   3  -5  -4 295.044 24.3487   5
  -3   5   4 238.948 20.8488   4
  -3  -5   4 251.534 22.2698   4
  -3   5   4 276.349 25.0686   2
   3  -5  -4 248.294 20.0743   3
  -3   5   4 259.445 26.8535   8
  -3   5   3 1885.49 126.005   5
   3  -5  -3 1833.79 128.401   5
  -3   5   3 1796.83 123.696   4
  -3  -5   3 1978.34 125.043   4
  -3  -5   3 1843.31 125.906   7
  -3   5   3 1897.23 130.165   2
   3  -5  -3 1820.35 123.208   3
  -3   5   3 1831.05 123.339   3
  -3   5   3 1900.47 133.092   8
   3  -5  -2 387.756 28.2409   6
   3   5  -2 404.618 28.9304   6
  -3   5   2 385.071 31.2417   5
  -3  -5   2 360.025 28.6917   4
  -3   5   2 336.164 28.0832   4
  -3  -5   2 421.331 30.7728   7
  -3   5   2 393.625 37.3830   8
   3  -5  -2 367.477 27.7922   3
  -3   5   1 126.727 20.1598   8
  -3   5   1 119.475 16.8272   2
   3   5  -1 154.072 13.1362   6
  -3   5   1 125.859 15.2033   5
   3  -5  -1 119.173 12.2841   6
   3  -5  -1 180.800 21.8685   5
   3   5  -1 139.371 12.4565   4
  -3  -5   1 152.606 13.3587   1
  -3  -5   1 146.252 13.8494   7
  -3   5   1 154.223 12.5852   3
   3  -5  -1 142.006 11.9443   3
   3  -5   0 1309.32 93.6624   3
  -3   5   0 1466.11 93.9887   3
  -3  -5   0 1378.01 96.5847   1
   3   5   0 1458.82 94.4026   4
   3  -5   0 1416.82 94.4285   4
  -3   5   0 1389.20 102.596   2
  -3  -5   0 1476.99 95.8766   7
   3   5   0 1341.40 94.1887   3
  -3  -5  -1 12.4228 6.31506   1
  -3  -5  -1 7.63028 3.57423   7
  -3  -5  -1 3.46538 2.97243   6
  -3   5  -1 9.89039 3.45791   6
  -3   5  -1 9.82372 3.23528   3
   3  -5   1 10.2110 2.66015   3
   3   5   1 5.12708 3.15715   3
   3  -5   1 8.97706 3.29247   4
  -3   5  -1 2.39356 10.5754   8
  -3   5  -1 12.8303 6.47341   2
  -3  -5  -2 720.879 50.3911   6
  -3   5  -2 709.053 50.6671   6
  -3   5  -2 599.747 56.3021   5
  -3   5  -2 699.542 57.3726   2
  -3   5  -2 741.209 47.9407   3
   3   5   2 714.289 48.4119   3
   3  -5   2 657.777 47.7436   3
  -3   5  -2 546.307 58.2843   8
  -3  -5  -2 787.617 49.1598   7
  -3   5  -3 524.994 49.3521   5
  -3   5  -3 520.678 44.9977   2
  -3   5  -3 508.581 34.7528   3
   3   5   3 489.017 35.2389   3
   3  -5   3 498.015 34.8720   3
  -3   5  -3 464.227 47.0819   8
  -3  -5  -3 522.332 35.2085   7
   3   5   4 814.756 53.6552   5
  -3   5  -4 711.826 68.5075   5
  -3   5  -4 768.579 64.2199   2
   3  -5   4 701.433 65.9146   8
  -3   5  -4 741.147 66.2990   8
  -3  -5  -4 777.288 55.3074   3
   3   5   4 837.400 54.7110   3
  -3   5  -4 809.857 53.9492   3
  -3  -5  -4 810.052 53.6768   7
   3  -5   5 647.059 59.2706   8
  -3   5  -5 804.986 67.9319   5
   3   5   5 685.025 47.3970   3
  -3   5  -5 709.394 46.7810   3
  -3   5  -5 663.534 56.9012   2
   3  -5   5 733.154 51.0666   1
  -3  -5  -5 650.839 47.9042   3
  -3   5  -6 21.0587 3.84702   3
  -3  -5  -6 23.6785 4.64681   3
   3   5   6 34.2597 5.06322   3
   3  -5   6 34.9562 12.3219   8
  -3   5  -6 8.27376 13.5872   5
  -3   5  -6 34.5100 10.2453   2
   3  -5   6 34.5242 7.66888   1
  -3   5  -7 603.346 73.0013   5
  -3   5  -7 745.090 63.3706   2
  -3  -5  -7 701.011 54.4347   3
  -3   5  -7 800.995 53.2449   3
   3   5   7 945.984 55.5699   3
   3  -5   7 774.929 66.4455   8
  -3   5  -8 25.8112 4.34319   3
  -3  -5  -8 26.3791 5.34837   3
   3  -5   8 31.1902 11.4077   8
  -3   5  -8 23.1653 9.75260   2
   3   5   8 27.2620 5.42672   3
  -3   5  -9 340.373 32.7500   2
  -3  -5  -9 360.494 26.1082   3
  -3   5  -9 377.413 24.2620   3
   3   5  10 159.288 13.7384   2
  -3   5 -10 128.755 18.0422   2
  -3   5 -10 138.963 11.4304   3
  -3  -5 -10 133.040 13.1155   3
  -3   5 -11 42.3413 10.8216   2
  -3  -5 -11 48.9114 7.54621   3
  -3   5 -11 34.0458 5.16525   3
  -3  -5 -12 293.566 20.8091   3
  -3   5 -12 12.9728 28.7874   5
  -3   5 -13 13.3849 25.1865   5
  -3   5 -13 6.91233 6.26058   3
  -3  -5 -13-0.84219 5.87919   3
  -3  -5 -14 148.361 14.4878   3
  -3   5 -14-6.66740 26.7490   5
  -3  -5 -15 68.9919 11.0800   3
  -3  -5 -15 109.718 24.3968   1
  -3   5 -16 19.0779 30.1882   5
  -3  -5 -16 88.3184 23.1517   1
   3  -6 -17 18.7141 12.0385   3
   3  -6 -16 45.8134 13.0327   3
   3  -6 -15 23.2263 11.1000   3
   3  -6 -14 14.6517 9.96338   3
   3  -6 -14 7.85038 7.99477   7
   3  -6 -13 224.614 24.2835   3
   3  -6 -13 268.464 23.9143   7
   3  -6 -12-2.57697 7.76307   3
   3  -6 -12-1.09860 7.59631   7
   3  -6 -11 590.733 42.6934   7
   3  -6 -11 486.562 42.2919   3
  -3   6  11 546.631 42.0068   2
   3  -6 -10 128.959 14.1688   3
  -3   6  10 100.830 13.0357   2
   3  -6 -10 113.352 13.4537   7
  -3   6   9 992.615 70.3755   2
   3  -6  -9 856.435 69.5640   5
  -3   6   9 887.200 69.4684   8
   3  -6  -8 3.55886 6.43535   5
  -3   6   8 11.5371 6.84488   2
  -3   6   8 12.6224 8.25889   8
   3  -6  -7 101.126 14.1855   5
   3  -6  -7 108.186 12.6023   3
  -3   6   7 123.706 17.0589   8
  -3   6   7 121.787 15.4638   2
   3  -6  -6 384.255 32.5088   5
  -3   6   6 428.596 34.3172   2
  -3   6   6 338.551 34.2950   8
   3  -6  -6 351.031 28.9220   3
   3  -6  -5 28.7878 5.82862   3
   3  -6  -5 18.6962 7.92179   5
  -3  -6   5 22.5582 7.50934   4
  -3   6   5 25.9247 6.08314   4
  -3   6   5 19.9220 10.2087   8
  -3   6   5 19.3176 7.57565   2
   3  -6  -4 514.586 40.9182   5
  -3  -6   4 497.984 35.3972   4
  -3   6   4 428.682 33.6024   4
   3  -6  -4 383.750 32.9177   3
  -3   6   4 551.781 41.6061   2
  -3   6   4 454.782 42.4028   8
  -3   6   4 462.438 35.4227   5
  -3   6   3 372.867 30.2063   5
   3  -6  -3 447.283 36.8977   5
  -3  -6   3 359.667 27.7227   4
  -3   6   3 328.586 26.8554   4
   3  -6  -3 360.219 27.1730   3
  -3   6   3 357.694 33.9717   2
   3  -6  -3 366.262 26.8700   6
  -3   6   3 341.610 36.6953   8
  -3   6   2 348.138 36.3813   8
  -3  -6   2 379.628 28.8164   7
   3   6  -2 336.472 25.9617   6
   3  -6  -2 332.256 25.4590   6
  -3   6   2 348.378 29.9235   5
  -3   6   2 324.229 25.6250   4
  -3  -6   2 330.913 25.2646   1
  -3   6   2 348.485 26.0410   3
   3  -6  -2 330.562 25.6556   3
   3  -6  -1 1080.65 73.4139   3
  -3   6   1 1078.35 78.6969   5
   3   6  -1 1117.90 74.1797   6
  -3   6   1 1048.67 82.7536   2
   3   6  -1 993.367 73.3631   3
  -3  -6   1 1097.09 74.6861   1
  -3  -6   1 1093.11 76.0921   7
  -3   6   1 1013.38 85.4750   8
  -3  -6   0 8.11409 4.85968   7
   3   6   0 5.75522 3.88406   3
   3  -6   0 12.3940 3.27877   3
  -3   6   0 9.52330 6.18181   5
  -3  -6   0 16.3337 5.74576   1
  -3   6   0 4.17516 7.87568   2
   3   6   0 4.18865 3.20549   4
   3  -6   0 9.82071 3.65025   4
   3  -6   1 1349.00 92.9494   3
   3   6   1 1484.99 93.6971   3
  -3   6  -1 1412.45 104.746   2
  -3   6  -1 1326.99 93.6381   6
  -3  -6  -1 1354.70 93.7661   6
   3   6   1 1384.57 93.4657   4
   3  -6   1 1422.73 93.5173   4
  -3  -6  -1 1494.36 95.4297   7
  -3   6  -2 123.353 11.8151   6
  -3  -6  -2 131.436 11.7201   7
   3  -6   2 105.250 9.89698   3
   3   6   2 110.434 10.5100   3
  -3   6  -2 100.263 17.3349   2
  -3  -6  -2 104.722 11.0822   6
  -3   6  -2 111.629 9.99550   3
  -3   6  -3 1746.12 133.255   5
   3   6   3 2008.59 117.869   3
   3  -6   3 1629.94 116.947   3
  -3   6  -3 1807.40 130.187   2
  -3   6  -3 1676.95 116.833   3
  -3  -6  -3 1858.26 117.951   7
  -3   6  -4 171.862 23.9822   2
   3   6   4 189.324 15.1348   3
  -3   6  -4 180.412 14.5574   3
  -3  -6  -4 201.432 14.7141   7
  -3  -6  -4 174.698 15.7095   3
  -3  -6  -5 327.654 23.3086   7
  -3   6  -5 274.847 40.4843   5
  -3   6  -5 273.788 33.7090   2
  -3  -6  -5 294.712 25.2188   3
   3   6   5 384.184 25.2213   3
  -3   6  -5 346.711 24.3696   3
   3  -6   5 336.508 27.7381   1
  -3   6  -6 629.481 69.2275   5
   3   6   6 700.197 48.6548   3
  -3   6  -6 634.113 59.2315   2
  -3  -6  -6 652.842 49.3139   3
  -3   6  -6 741.697 48.1179   3
   3  -6   6 741.326 52.1859   1
  -3   6  -7-5.15436 16.8015   5
  -3   6  -7 9.58852 9.30376   2
   3  -6   7 1.00868 6.30223   1
  -3   6  -7 5.40550 3.20189   3
  -3  -6  -7 5.06092 4.09155   3
  -3   6  -8 217.643 25.4108   2
  -3   6  -8 195.848 13.8135   3
  -3  -6  -8 150.068 14.7610   3
  -3   6  -9 412.611 36.6966   2
  -3  -6  -9 413.158 26.7405   3
  -3   6 -10 86.3345 16.3852   2
  -3  -6 -10 88.0825 10.2212   3
  -3   6 -11 491.949 39.7232   2
   3   6  11 410.249 29.4456   2
  -3  -6 -11 460.476 32.1049   3
  -3  -6 -12-0.86407 5.86224   3
  -3   6 -12 6.91983 24.3598   5
  -3  -6 -13 459.488 28.3008   3
  -3   6 -13 7.10866 34.5894   5
  -3   6 -14-7.05310 27.3605   5
  -3  -6 -14-1.93982 6.89094   3
  -3   6 -15 34.7125 32.7002   5
  -3  -6 -15 116.367 14.7907   3
  -3  -6 -16 64.0427 21.5582   1
  -3   6 -16-26.7600 30.8698   5
  -3   6 -17-38.6948 29.8292   5
   3  -7 -16 1.67435 9.83827   3
   3  -7 -15 204.112 23.6499   3
   3  -7 -14 29.7730 10.0960   7
   3  -7 -14 10.6794 10.9208   3
   3  -7 -13 52.6068 11.3703   7
   3  -7 -13 61.7726 12.2637   3
   3  -7 -12 135.089 16.5564   7
   3  -7 -12 145.190 17.7791   3
  -3   7  11 30.1164 8.61112   2
   3  -7 -11 26.5827 8.40418   7
   3  -7 -11 13.8036 8.05861   3
  -3   7  10 76.7753 13.0556   8
   3  -7 -10 94.4001 13.4280   3
   3  -7 -10 112.996 13.9089   7
  -3   7  10 98.0146 14.0158   2
  -3   7   9 40.1407 10.2996   8
  -3   7   9 16.7106 8.03080   2
  -3   7   8 107.913 15.5931   2
  -3   7   8 114.092 17.6012   8
   3  -7  -8 121.202 17.1667   5
  -3   7   7 531.777 45.3711   2
  -3   7   7 514.709 46.9083   8
   3  -7  -7 491.996 40.6568   3
  -3  -7   6 47.3592 10.9319   4
   3  -7  -6 60.4669 9.11610   3
  -3   7   6 53.9699 14.2677   8
  -3   7   6 60.6774 11.9786   2
   3  -7  -6 68.8324 14.9037   5
   3  -7  -5 1506.29 100.950   5
  -3  -7   5 1342.40 92.3769   4
  -3   7   5 1115.56 89.7014   4
  -3   7   5 1348.84 100.372   8
   3  -7  -5 1332.90 90.2676   3
  -3   7   5 1453.93 98.7146   2
  -3   7   5 1400.35 92.1184   5
   3  -7  -4 97.6605 10.8517   3
  -3   7   4 90.3433 12.0028   5
  -3  -7   4 98.9808 11.1525   4
   3  -7  -4 77.1513 17.5808   5
  -3   7   4 96.1989 10.3507   4
  -3   7   4 109.657 16.5954   2
  -3   7   3 1933.43 135.361   5
  -3   7   3 1796.10 130.689   4
  -3  -7   3 1964.11 131.692   4
   3   7  -3 2115.73 131.956   6
   3  -7  -3 1968.57 130.703   6
   3  -7  -3 1931.21 131.558   3
  -3   7   3 2027.82 142.135   2
  -3  -7   2 31.3464 5.61658   1
  -3   7   2 21.2652 8.01862   5
   3   7  -2 22.9251 5.55641   6
   3  -7  -2 33.3747 5.39907   6
   3  -7  -2 38.8167 6.00657   3
  -3  -7   1 603.475 43.7686   1
  -3   7   1 534.271 51.7203   2
   3  -7  -1 600.860 42.3977   3
  -3   7   1 614.542 48.6210   5
  -3   7   0 251.309 27.2532   5
   3   7   0 263.200 20.2668   4
  -3   7   0 279.550 31.0909   2
  -3   7   0 274.233 20.8874   3
   3  -7   0 265.083 20.7614   3
  -3   7  -1 114.538 19.1673   2
  -3   7  -1 80.6604 8.91889   3
   3  -7   1 89.2460 9.08222   3
   3   7   1 94.7876 8.89334   4
   3  -7   1 88.6027 8.73801   4
  -3   7  -2 194.456 16.5928   6
  -3  -7  -2 209.513 16.6691   6
   3  -7   2 193.840 16.1540   4
  -3   7  -2 202.548 26.4850   2
   3  -7   2 186.605 15.9640   3
  -3   7  -3 666.868 50.2567   6
  -3  -7  -3 695.504 49.9884   6
  -3   7  -3 815.189 64.4037   2
  -3   7  -4 281.541 42.1661   5
  -3   7  -4 351.098 38.7403   2
  -3  -7  -4 313.197 26.5520   3
  -3  -7  -4 373.204 26.0278   7
  -3   7  -5 765.480 64.9005   2
   3   7   5 715.564 46.3233   5
   3   7   5 740.850 47.7049   5
  -3  -7  -5 724.290 47.9804   7
  -3  -7  -5 721.168 50.2162   3
   3  -7   5 689.163 51.4202   1
   3  -7   6 152.104 15.5000   1
  -3   7  -6 159.773 24.0912   2
  -3  -7  -6 136.421 10.1980   7
  -3  -7  -6 131.018 13.1243   3
  -3   7  -7 817.784 59.3225   2
   3  -7   7 907.659 46.9093   1
  -3   7  -8-6.05796 18.9040   5
  -3   7  -8 10.8928 10.2498   2
  -3  -7  -8 1.52890 4.88106   3
  -3   7  -9 590.878 52.1951   2
  -3   7  -9 591.272 38.3457   3
  -3  -7  -9 643.161 41.4113   3
  -3   7 -10 45.7533 15.4606   2
  -3  -7 -10 45.1825 8.44852   3
   3   7  11 124.604 14.5536   2
  -3  -7 -11 134.440 14.0696   3
  -3   7 -11 118.591 21.0195   2
  -3   7 -12 7.33035 29.4929   5
  -3  -7 -12 62.9180 10.3821   3
  -3   7 -13-7.49020 27.2944   5
  -3  -7 -13 5.19753 6.98948   3
  -3   7 -14 22.2132 27.0660   5
  -3  -7 -14 34.9672 10.4021   3
  -3   7 -15 7.26328 28.7865   5
  -3  -7 -15 111.507 14.9248   3
  -3   7 -16-13.9545 25.4398   5
  -3   7 -17 6.71105 26.7915   5
   3  -8 -16 8.46980 11.7242   3
   3  -8 -15 42.1153 12.9466   3
   3  -8 -14 3.09323 9.08933   3
   3  -8 -13 478.039 38.0973   7
   3  -8 -13 448.516 39.5165   3
  -3   8  12-6.29090 7.30324   2
   3  -8 -12-2.76608 8.53790   3
   3  -8 -12-4.47289 7.73689   7
  -3   8  11 367.608 32.5831   2
   3  -8 -11 316.013 31.3431   3
   3  -8 -10 21.2101 8.35236   7
   3  -8 -10 36.1126 9.97684   3
  -3   8   9 576.149 47.6760   2
  -3   8   8 57.4578 12.8434   2
  -3  -8   7 177.793 22.3201   4
   3  -8  -7 222.851 20.7216   3
  -3   8   7 260.161 26.7518   2
   3  -8  -7 284.654 35.0019   5
  -3  -8   6 66.8365 11.4129   4
  -3   8   6 69.3566 9.74629   4
  -3   8   6 101.532 16.4309   2
   3  -8  -6 56.2418 9.47621   3
   3  -8  -6 76.7946 20.6230   5
   3  -8  -5 2.90753 14.4755   5
   3  -8  -5 0.84421 4.89775   3
  -3  -8   5 1.89530 4.88500   4
  -3   8   5 1.44263 4.18531   4
  -3   8   5 2.21654 8.07769   2
  -3   8   5 4.37664 6.00383   5
  -3   8   4 29.3770 8.39315   5
  -3   8   4 22.1220 4.71214   4
  -3  -8   4 17.3449 5.44715   4
   3  -8  -4 17.5251 5.48883   3
  -3   8   4 16.4867 10.9236   2
   3  -8  -4 14.4834 4.50878   6
   3   8  -4 20.5155 5.89447   6
  -3   8   3 539.238 46.5365   5
  -3   8   3 672.008 54.9284   2
   3  -8  -3 574.986 41.4708   6
   3   8  -3 587.873 42.3998   6
   3  -8  -3 617.583 43.2295   3
  -3   8   2 6.35588 7.77020   5
  -3  -8   2 1.73774 4.04581   1
   3   8  -2 0.60250 3.58980   6
   3  -8  -2 7.49431 4.44471   3
  -3  -8   1 830.740 59.6424   1
   3  -8  -1 859.221 58.6343   3
  -3   8   1 808.042 65.2540   5
  -3   8   0-8.61310 10.4616   2
   3  -8   0 2.46726 3.80547   3
  -3   8   0 2.11394 7.95552   5
   3  -8   1 1578.68 101.155   4
   3   8   1 1473.60 100.732   4
   3  -8   1 1505.59 101.983   3
  -3   8  -1 1438.95 113.554   5
  -3   8  -1 1622.91 119.169   2
  -3   8  -2 103.445 21.1923   2
  -3   8  -2 78.4789 8.64839   6
  -3  -8  -2 82.9060 8.52023   6
   3   8   2 75.9050 8.31162   4
   3  -8   2 75.5518 8.15084   4
  -3   8  -2 51.0713 16.9481   5
   3  -8   2 65.6893 8.49825   3
  -3   8  -3 1198.91 81.6979   6
  -3  -8  -3 1158.46 81.0695   6
  -3   8  -3 1318.21 100.531   2
  -3   8  -4 36.4138 6.23173   3
  -3   8  -4 30.5745 14.8200   2
  -3  -8  -4 34.2289 7.05601   6
   3   8   5 119.406 10.8291   5
  -3  -8  -5 83.8209 11.1378   3
  -3   8  -5 115.124 23.4212   2
  -3   8  -5 109.727 10.5540   3
  -3  -8  -5 96.2148 10.2866   7
  -3  -8  -6 0.81920 4.63625   3
  -3   8  -6 6.67274 4.48217   3
  -3  -8  -6 6.18297 3.44591   7
  -3   8  -6 13.3443 13.6853   2
   3  -8   6 4.86533 6.21803   1
  -3   8  -6 5.26500 17.8632   5
  -3  -8  -7 2.52506 5.19514   3
  -3  -8  -7 2.27215 2.10533   7
  -3   8  -7-11.9534 21.0403   5
  -3   8  -7 3.22773 12.1481   2
   3  -8   7 7.07144 6.58671   1
  -3   8  -8-6.42825 22.6328   5
  -3  -8  -8 7.01003 5.84308   3
  -3   8  -8 6.25465 12.4895   2
  -3  -8  -9 361.529 26.8215   3
  -3   8  -9 371.458 38.9916   2
  -3   8 -10 37.6428 16.1260   2
  -3  -8 -10 9.57958 6.94364   3
  -3   8 -11 265.784 32.2139   2
  -3  -8 -11 241.383 21.6520   3
   3   8  11 256.542 24.6863   2
  -3   8 -12-22.8429 27.7457   5
  -3  -8 -12 6.46509 7.45141   3
  -3   8 -13 53.9687 37.3631   5
  -3  -8 -13 441.505 30.2697   3
  -3   8 -14-15.0581 29.2065   5
  -3  -8 -14 2.37615 9.08090   3
  -3   8 -15-7.40053 26.5793   5
  -3  -8 -15 108.361 15.1797   3
  -3   8 -16-7.23149 30.4303   5
   3  -9 -15 252.349 27.9101   3
   3  -9 -14 29.3248 12.8715   3
   3  -9 -13 152.442 19.1682   3
  -3   9  13 120.889 17.7059   2
   3  -9 -12 9.35324 8.39301   7
   3  -9 -12 4.35655 9.07738   3
  -3   9  12 9.92663 8.86495   2
   3  -9 -11 4.85517 7.59831   7
   3  -9 -11 6.82530 8.44264   3
  -3   9  11 23.1990 11.2868   2
   3  -9 -10 14.1214 8.43257   3
  -3   9  10 19.1569 10.1540   2
  -3   9   9 144.584 20.6482   2
  -3  -9   8-4.83253 8.02293   4
  -3   9   8-2.06644 9.32695   2
   3  -9  -7 802.809 55.6857   3
  -3   9   7 748.780 62.2107   2
  -3  -9   7 795.548 57.4414   4
  -3   9   7 666.327 53.8548   4
   3  -9  -6 11.8999 6.28557   3
  -3  -9   6 6.38389 5.86580   4
  -3   9   6 7.91261 5.29599   4
  -3   9   6 14.2959 10.9973   2
  -3   9   5 1051.32 83.3355   2
   3  -9  -5 944.078 72.7540   3
   3  -9  -5 1053.13 70.7051   6
  -3   9   5 1172.74 75.7722   5
  -3  -9   5 1059.79 72.5499   4
  -3   9   5 990.286 71.0394   4
  -3   9   4 2.73917 6.31333   5
  -3   9   4-1.16936 4.08070   4
   3  -9  -4 2.52187 4.61263   3
  -3   9   4 5.40631 10.1733   2
   3   9  -4 0.69727 4.35261   6
   3  -9  -4 3.14722 3.82387   6
  -3   9   3 1159.51 81.7928   5
   3  -9  -3 1121.37 74.2303   6
  -3   9   3 1164.37 90.4775   2
   3  -9  -3 1026.84 75.8988   3
   3   9  -3 1082.97 74.8963   6
  -3   9   2 7.05889 8.01300   5
   3  -9  -2 14.9884 5.35213   3
  -3  -9   2 15.9621 5.44733   1
  -3  -9   1 211.835 18.2968   1
   3  -9  -1 170.204 16.4068   3
  -3   9   1 165.377 22.6201   5
  -3   9   0 4.70194 8.29309   5
   3  -9   0 9.07076 4.62585   3
  -3   9   0 9.92012 11.6526   2
  -3   9  -1 36.4408 14.0245   5
   3  -9   1 28.3225 6.28751   3
   3   9   1 16.2830 4.25846   4
  -3   9  -1 45.9605 17.9665   2
  -3   9  -2 9.96956 12.5075   5
  -3   9  -2-10.9649 15.7592   2
   3  -9   2 4.12342 4.48309   3
   3  -9   2 4.31729 3.42713   4
   3   9   2 2.56999 3.02085   4
  -3   9  -3 400.258 45.0909   2
  -3   9  -3 287.333 24.5599   6
  -3  -9  -3 324.656 24.7238   6
   3  -9   3 364.611 24.6892   4
  -3   9  -3 222.310 37.5930   5
  -3  -9  -4 47.6635 7.63970   6
  -3   9  -4 48.3276 8.25141   6
  -3   9  -4 34.3858 17.1275   2
  -3  -9  -5 568.218 47.1145   3
   3   9   5 703.097 46.3667   5
  -3   9  -5 632.146 64.4854   2
  -3   9  -6-5.58295 20.3540   5
  -3  -9  -6 10.0965 5.76596   3
   3  -9   6 12.8304 6.91782   1
  -3   9  -6 7.49860 14.9803   2
  -3  -9  -6 10.8185 4.95188   7
  -3   9  -7 953.552 78.9529   2
  -3  -9  -7 896.569 55.1104   7
  -3  -9  -7 857.642 59.5793   3
  -3   9  -8 6.59134 24.8164   5
  -3  -9  -8 8.90278 6.62195   3
  -3   9  -8 31.3086 16.3811   2
  -3   9  -9 366.493 39.6221   2
  -3  -9  -9 370.196 25.0165   3
  -3  -9 -10 9.70815 7.18733   3
  -3   9 -10-3.19194 14.4079   2
  -3   9 -10 7.32889 24.8645   5
  -3   9 -11 76.5723 22.6246   2
  -3   9 -11 22.7738 28.0549   5
   3   9  11 57.7265 15.9648   2
  -3  -9 -11 90.2197 12.8853   3
  -3   9 -12-7.65079 26.9335   5
  -3  -9 -12-2.36302 7.94036   3
  -3   9 -13 7.65306 27.8877   5
  -3  -9 -13 3.70333 8.21647   3
  -3   9 -14-7.68499 26.0696   5
  -3  -9 -14-1.28933 8.74838   3
  -3   9 -15 7.50221 29.1063   5
   3 -10 -14 23.7804 12.0568   3
   3 -10 -13 159.938 21.4929   3
   3 -10 -12 1.53042 9.65903   3
  -3  10  12-1.58535 8.94942   2
   3 -10 -12-1.20576 8.71376   7
   3 -10 -11 256.038 24.2994   7
  -3  10  11 206.093 25.2117   2
   3 -10 -11 235.586 24.6060   3
  -3 -10  10-1.92172 10.0695   4
  -3  10  10 9.92705 10.5694   2
  -3 -10   9 432.295 38.3439   4
  -3  10   9 403.304 34.7237   4
  -3  10   9 436.430 41.4192   2
  -3  10   8 7.04486 10.3657   2
   3 -10  -8-6.12676 8.39649   3
  -3 -10   8 15.6410 8.67327   4
  -3  10   8 3.01901 6.21342   4
  -3  10   7 73.0666 17.1093   2
   3 -10  -7 62.1491 11.1461   3
  -3 -10   7 61.0640 11.3068   4
  -3  10   7 66.8160 9.69578   4
  -3  10   6 17.4312 7.74566   5
  -3  10   6 10.6061 5.16213   4
  -3 -10   6 22.8955 6.99553   4
  -3  10   6 24.3436 12.5239   2
   3 -10  -6 30.8328 7.88654   3
  -3 -10   5 21.2186 6.01139   4
  -3  10   5 17.3283 7.52258   5
  -3  10   5 2.87993 10.9091   2
   3 -10  -5 22.5256 7.18586   3
  -3  10   5 20.8740 5.52908   4
   3  10  -4 46.3829 7.63016   6
  -3  10   4 64.9889 12.5724   5
  -3  10   4 57.5223 16.4343   2
   3 -10  -4 46.7321 9.12686   3
  -3  10   3 186.533 21.9554   5
   3 -10  -3 166.601 16.8326   3
  -3  10   3 204.143 28.1711   2
  -3 -10   2 24.5880 6.34227   1
   3 -10  -2 19.3305 6.59564   3
  -3  10   2 29.2016 10.3069   5
  -3 -10   1 633.585 43.8675   1
   3 -10  -1 526.721 42.0849   3
  -3  10   1 572.002 50.7348   5
  -3  10   0 22.0147 15.4513   2
   3 -10   0 10.2531 5.43992   3
  -3  10   0 5.19143 8.82852   5
  -3  10  -1 621.346 63.1247   5
  -3  10  -1 731.276 70.5091   2
   3 -10   1 741.840 51.8539   3
  -3  10  -2 4.02679 14.1764   2
   3 -10   2 7.09059 5.54926   3
   3  10   2 1.48608 3.09135   4
  -3  10  -2-3.52063 11.9439   5
  -3  10  -3 766.962 70.4389   2
  -3  10  -3 759.377 69.5722   5
   3 -10   3 644.300 45.6351   4
   3  10   3 666.635 45.8266   4
  -3  10  -4 25.0738 18.0178   2
  -3  10  -4 3.37305 4.30640   6
  -3 -10  -4 1.18631 3.82774   6
  -3  10  -4 23.4667 18.2066   5
   3 -10   4 0.52738 4.03274   4
   3  10   4-6.05234 10.0444   5
  -3  10  -5 222.609 35.9337   2
  -3  10  -5 221.450 20.1900   6
   3  10   5 217.417 19.5841   5
  -3 -10  -5 216.455 19.1382   6
  -3 -10  -6 35.1933 8.58345   3
  -3 -10  -6 34.6912 7.34631   7
  -3  10  -6 53.7643 21.0821   2
  -3  10  -7 35.7217 18.6987   2
  -3  10  -7 6.29775 21.3874   5
  -3 -10  -7 13.7329 7.82820   3
  -3  10  -8 15.2196 17.9112   2
  -3 -10  -8 9.90435 6.82192   3
  -3  10  -8 6.71168 24.4653   5
  -3  10  -9 171.569 31.0293   2
  -3 -10  -9 182.317 17.9278   3
  -3  10 -10 22.0389 25.8614   5
  -3  10 -10-3.45055 15.5698   2
  -3 -10 -10-3.57645 8.08931   3
   3  10  11 192.962 26.3447   2
  -3  10 -11 196.131 33.1199   2
  -3 -10 -11 187.370 19.6620   3
  -3 -10 -12 7.84645 9.12955   3
  -3  10 -12-15.2802 26.8970   5
  -3 -10 -13 316.573 25.7661   3
  -3  10 -13 7.65390 31.5828   5
  -3 -10 -14-1.41623 9.88166   3
  -3  10 -14 7.63124 27.8070   5
   3 -11 -13 51.1242 14.0079   3
  -3  11  12 19.5047 10.9762   2
   3 -11 -12 20.3978 11.1813   3
  -3 -11  12 2.09135 10.9919   4
  -3  11  11 18.0203 12.0865   2
  -3 -11  11 3.82572 11.1205   4
   3 -11 -11 17.7226 10.3333   3
   3 -11 -11 10.5951 9.76191   7
  -3 -11  10 25.5066 10.6146   4
  -3  11  10 24.4819 12.6672   2
  -3 -11   9 83.4381 14.2596   4
  -3  11   9 55.8571 17.5817   2
   3 -11  -8 55.8405 11.5646   3
  -3  11   8 47.6193 15.5889   2
  -3 -11   8 64.5699 11.4672   4
  -3  11   7 425.465 42.9177   2
  -3 -11   7 360.998 29.9902   4
  -3  11   7 352.212 28.4834   4
   3 -11  -7 376.357 31.9750   3
  -3  11   6 5.03214 7.01378   5
  -3 -11   6 8.42703 5.36041   4
   3 -11  -6 13.2714 8.06980   3
  -3  11   6 15.1626 13.3882   2
  -3  11   6 2.56246 4.68581   4
  -3  11   5 276.711 37.0878   2
   3 -11  -5 277.005 26.2029   3
  -3  11   5 370.265 30.4298   5
  -3  11   4 1.65143 7.76922   5
  -3  11   4-10.1043 13.8129   2
   3 -11  -4-0.98873 6.51235   3
  -3  11   3 725.942 64.4677   2
  -3  11   3 568.231 52.1020   5
   3 -11  -3 648.829 47.7321   3
  -3 -11   2 30.6966 7.49593   1
   3 -11  -2 28.7525 7.90538   3
  -3  11   2 34.0716 11.8463   5
   3 -11  -1 145.280 15.4927   3
  -3  11   1 115.745 20.5789   5
  -3 -11   1 179.051 17.1771   1
  -3  11   0 129.166 26.3599   2
   3 -11   0 78.2597 11.0653   3
  -3  11   0 98.2421 19.3174   5
  -3  11  -1 3.24139 12.5788   5
   3 -11   1 7.95097 6.39413   3
  -3  11  -1-4.28640 14.5448   2
  -3  11  -2 48.4150 20.8409   2
  -3  11  -2 30.1590 16.0392   5
  -3  11  -3 284.344 42.7110   2
  -3  11  -3 249.556 38.9947   5
  -3  11  -4 4.53331 15.9683   2
  -3  11  -4 8.78672 3.91006   6
  -3  11  -4-4.89898 17.2549   5
   3  11   4 15.8915 11.2274   5
   3  11   5 241.940 21.3039   5
  -3  11  -5 248.418 20.6062   6
  -3  11  -5 285.976 42.0904   2
  -3  11  -6-0.98384 5.78058   6
  -3  11  -6 4.45280 16.2253   2
  -3 -11  -7 401.833 31.7727   3
  -3  11  -7 378.948 48.3549   2
  -3 -11  -8 12.1412 8.42337   3
  -3  11  -8 8.13525 16.2516   2
  -3  11  -8 6.82376 24.0318   5
  -3  11  -9 214.231 36.7563   2
  -3 -11  -9 262.221 22.4329   3
  -3  11 -10 7.38698 18.1105   2
  -3 -11 -10 26.2684 10.3595   3
  -3  11 -10 22.2672 27.0822   5
  -3  11 -11 38.9884 20.3450   2
  -3 -11 -11 26.0566 10.1173   3
  -3  11 -11-7.61611 24.8718   5
  -3 -11 -12 65.6559 13.7148   3
  -3  11 -12 15.2463 28.0137   5
  -3 -11 -13 4.44968 10.1642   3
  -3  11 -13 7.62488 29.5798   5
  -3 -11 -14 76.6562 15.5836   3
   3 -12 -12 1.62463 10.3710   3
  -3  12  12 7.85916 11.0951   2
  -3  12  11 151.790 24.6418   2
   3 -12 -11 197.587 22.3605   3
  -3  12  10 2.46532 12.4917   2
  -3  12   9 183.113 27.4838   2
   3 -12  -8 5.22048 8.60766   3
  -3  12   8 11.7006 13.2066   2
   3 -12  -7 39.7651 10.1610   3
  -3  12   7 6.25418 14.5328   2
  -3  12   6 61.7525 12.4701   5
   3 -12  -6 80.8467 12.8236   3
  -3  12   5 4.64773 8.38364   5
   3 -12  -5 5.61361 6.77655   3
  -3  12   5 17.7358 15.6589   2
  -3  12   4 137.269 27.9490   2
   3 -12  -4 175.290 18.5820   3
  -3  12   4 186.986 22.1581   5
   3 -12  -3 177.286 18.4243   3
  -3  12   3 142.044 28.8033   2
  -3  12   3 185.495 23.4504   5
   3 -12  -2 143.763 16.4669   3
  -3  12   2 166.562 22.7321   5
  -3  12   2 157.906 31.0772   2
   3 -12  -1 310.311 26.6417   3
  -3  12   1 307.684 34.7122   5
  -3 -12   1 292.382 26.1054   1
   3 -12   0 46.5340 9.68088   3
  -3  12   0 29.7760 14.4958   5
  -3  12   0 22.0298 17.7590   2
   3 -12   1 423.766 32.5468   3
  -3  12  -1 314.754 41.6730   5
  -3  12  -1 364.196 49.4386   2
  -3  12  -2-3.95491 14.4133   5
   3  12   3 589.016 49.4647   5
  -3  12  -3 454.944 55.0192   2
  -3  12  -4 81.4696 26.8160   2
   3  12   4 84.6815 16.9728   5
  -3  12  -4 75.9128 25.7429   5
  -3  12  -5 47.8088 24.5646   2
   3  12   5 70.3157 10.7683   5
  -3  12  -5 39.2987 23.9722   5
  -3  12  -6-6.06734 28.0620   5
  -3  12  -6 74.9303 26.9021   2
  -3  12  -7 8.87105 18.1991   2
  -3 -12  -8 40.1238 11.4178   3
  -3  12  -8 6.83310 24.9728   5
  -3  12  -8 12.7941 19.7504   2
  -3 -12  -9 128.656 16.6798   3
  -3  12  -9 98.9423 28.1348   2
  -3  12 -10 14.6610 26.7163   5
  -3 -12 -10 8.57989 10.5207   3
  -3  12 -10 3.90080 17.6085   2
  -3  12 -11 67.4310 23.5507   2
  -3  12 -11 37.4368 34.0853   5
  -3 -12 -11 77.1234 14.9325   3
  -3 -12 -12-3.06851 10.2088   3
  -3 -12 -13 79.3656 16.0651   3
  -3  13  11 14.7025 14.6116   2
  -3  13  10 56.6924 19.0185   2
  -3  13   9 29.5246 15.5825   2
   3 -13  -8 76.6877 14.5050   3
  -3  13   8 77.0546 21.5046   2
   3 -13  -7 112.567 16.1890   3
  -3  13   7 88.9463 23.7544   2
   3 -13  -6-1.28206 8.61829   3
  -3  13   6 15.5499 9.21846   5
  -3  13   6-3.66038 14.6134   2
  -3  13   5 153.156 19.6340   5
  -3  13   5 120.357 27.3012   2
   3 -13  -5 131.817 16.8848   3
   3 -13  -4 1.17603 7.34819   3
  -3  13   4 8.11122 15.7365   2
  -3  13   4 13.3329 10.1435   5
   3 -13  -3 161.810 18.7060   3
  -3  13   3 189.190 24.9304   5
  -3  13   3 229.809 35.6926   2
   3 -13  -2 38.2483 10.0100   3
  -3  13   2 47.2410 15.2546   5
  -3  13   1 30.0823 14.5839   5
   3 -13  -1 9.97366 7.64588   3
   3 -13   0 148.090 16.5726   3
  -3  13   0 116.002 29.3446   2
  -3  13   0 128.309 24.4923   5
  -3  13  -1-4.80673 18.6468   2
  -3  13  -1 7.19325 13.1065   5
  -3  13  -2 123.329 31.3621   2
  -3  13  -2 126.307 28.7794   5
   3  13   2 174.487 35.3434   5
  -3  13  -3 65.7460 25.1332   2
   3  13   3 84.2251 22.2022   5
  -3  13  -3 59.1934 22.3058   5
  -3  13  -4 5.04200 17.7874   2
  -3  13  -4 30.7780 19.3398   5
   3  13   4 19.6856 10.7123   5
  -3  13  -5 97.8796 29.9824   2
  -3  13  -5 16.9418 22.1001   5
  -3  13  -6-4.74341 17.2922   2
  -3  13  -6 36.6112 25.6793   5
  -3  13  -7 83.1751 26.9819   2
  -3  13  -8 31.1436 21.8427   2
  -3  13  -9 77.4058 27.0382   2
  -3  13  -9 21.3905 28.6503   5
  -3 -13 -10 58.9401 14.2821   3
  -3  13 -10 56.9668 24.3346   2
  -3 -13 -11 38.6801 14.1189   3
  -3 -13 -12 61.6342 15.8607   3
  -3  14  11 39.7548 18.5016   2
  -3  14  10-17.5998 17.0500   2
  -3  14   9 73.4814 21.3562   2
  -3  14   8 59.1503 20.5016   2
   3 -14  -8 54.8453 13.9972   3
  -3  14   7-7.42601 17.1137   2
   3 -14  -7 2.83798 9.81048   3
  -3  14   6 75.2873 15.5270   5
  -3  14   6 95.3816 26.4481   2
   3 -14  -6 134.759 16.8860   3
  -3  14   5 1.72799 9.88909   5
   3 -14  -5 2.60404 8.66201   3
  -3  14   5-16.7561 18.9013   2
  -3  14   4 162.436 33.7490   2
  -3  14   4 149.509 21.5438   5
   3 -14  -4 154.918 18.9984   3
  -3  14   3 30.4453 13.6893   5
   3 -14  -3 26.2362 9.48439   3
  -3  14   3 18.0633 21.3117   2
  -3  14   2 124.431 23.5930   5
   3 -14  -2 146.294 17.4639   3
  -3  14   2 129.796 31.1912   2
  -3  14   1 68.6270 19.0875   5
   3 -14  -1 79.7839 13.3452   3
  -3  14   0 26.1622 16.9329   5
  -3  14   0 24.6890 22.3408   2
   3  14   1 202.367 40.6989   5
  -3  14  -1 151.757 29.5173   5
  -3  14  -1 145.314 33.6099   2
  -3  14  -2 12.5072 15.1961   5
   3  14   2-12.3122 21.1523   5
  -3  14  -2 15.2363 20.8315   2
   3  14   3 90.2040 20.9840   5
  -3  14  -3 37.1014 22.3521   5
  -3  14  -3 128.539 34.5493   2
  -3  14  -4 10.3106 22.2810   5
  -3  14  -4 40.8775 24.5620   2
  -3  14  -5 33.9792 25.0126   5
  -3  14  -5 5.06059 19.6582   2
  -3  14  -6 18.2383 23.6982   5
  -3  14  -6 59.1211 26.7296   2
  -3  14  -7-6.48338 20.2338   5
  -3  14  -7 18.9669 21.3980   2
  -3  14  -8 6.78761 28.7580   5
  -3  14  -8 106.267 31.2264   2
  -3  14  -9-8.72853 20.5380   2
  -3  14 -10 54.7375 25.3014   2
  -3  15  10 56.4433 21.5828   2
  -3  15   9 27.3953 19.6768   2
  -3  15   8-3.72407 17.1664   2
   3 -15  -7 43.0691 12.8362   3
  -3  15   7 31.7409 20.6071   2
   3 -15  -6 26.0851 11.4980   3
  -3  15   6 12.7707 18.4099   2
   3 -15  -5 31.1759 11.2013   3
  -3  15   5 44.8650 20.8324   2
  -3  15   5 48.1466 13.1317   5
   3 -15  -4 16.6110 9.88350   3
  -3  15   4 30.9389 13.0562   5
   3 -15  -3 6.75057 9.37646   3
  -3  15   3 23.9327 13.7252   5
  -3  15   3 28.9829 20.3439   2
   3 -15  -2 142.591 18.5276   3
  -3  15   2 128.335 32.6814   2
  -3  15   2 125.578 23.7794   5
  -3  15   1 3.02971 14.5358   5
  -3  15   0 123.983 26.0972   5
   3  15   0 42.4042 29.4442   5
  -3  15  -1 15.7093 19.0815   2
  -3  15  -1-3.77220 15.4708   5
   3  15   1-15.0408 27.5049   5
  -3  15  -2 42.1025 24.3428   2
  -3  15  -2 25.4920 18.8599   5
  -3  15  -3-5.28706 19.9078   2
  -3  15  -3-14.0763 19.7531   5
  -3  15  -4 36.6582 26.5924   2
  -3  15  -4 20.4554 23.6374   5
  -3  15  -5-10.3392 19.4631   2
  -3  15  -5-5.54465 23.3361   5
  -3  15  -6 20.1558 21.7254   2
  -3  15  -6-12.0500 21.9545   5
  -3  15  -7 19.6313 20.6535   2
  -3  15  -7-6.30255 25.8497   5
  -3  15  -8 14.1286 20.3253   2
  -3  16   5-4.72967 19.3988   2
  -3  16   4 104.144 31.3228   2
   3 -16  -3 7.27582 10.0712   3
  -3  16   3-5.12868 19.9003   2
  -3  16   3 12.2682 13.0668   5
  -3  16   2 52.2578 27.3654   2
  -3  16   2 89.1347 21.1690   5
  -3  16   1 18.9923 17.4231   5
   3  16  -1 34.0060 34.4878   5
  -3  16   0 16.0356 22.5378   2
  -3  16   0 27.1741 18.6921   5
   3  16   0 23.2184 29.9480   5
  -3  16  -1-3.82355 20.3507   5
  -3  16  -1 27.1019 24.4581   2
  -3  16  -2 12.7007 18.6840   5
  -3  16  -2-5.45801 20.5419   2
  -3  16  -3 18.6875 21.0938   5
  -3  16  -3 5.44635 20.5108   2
  -3  16  -4 5.11826 19.2646   5
   3  17  -3-16.2406 35.8493   5
   3  17  -2 14.5787 31.4295   5
  -3  17   2 2.85031 15.6403   5
  -3  17   1-3.25561 16.4960   5
  -3  17   0 84.5136 24.7263   5
  -3  17  -1-3.78738 19.5185   5
   4   0 -18 37.1539 13.6319   3
   4   0 -17 1.74840 11.2778   3
   4   0 -16 18.7732 10.7193   3
   4   0 -15-1.66602 9.78930   3
   4   0 -14 99.3114 15.8034   3
   4   0 -13-1.60452 8.26900   3
   4   0 -12 783.525 60.9170   3
   4   0 -11-2.47077 6.78101   2
   4   0 -11-4.52566 7.90553   3
   4   0 -10 1273.12 97.3535   7
   4   0 -10 1504.94 97.7572   2
   4   0  -9-1.17680 5.64594   7
   4   0  -9-1.06176 6.23880   2
   4   0  -8 1336.25 92.9263   8
   4   0  -8 1386.91 96.5502   7
   4   0  -8 1445.78 96.1109   2
   4   0  -7 2.01682 3.46732   8
   4   0  -7 2.84129 4.80067   2
   4   0  -7 2.00622 5.25660   7
   4   0  -6 538.123 39.0520   7
   4   0  -6 469.492 38.4600   2
   4   0  -5 1.72621 4.14062   2
  -4   0   5-1.19570 4.35696   4
  -4   0   4 471.473 35.7436   4
   4   0  -4 426.237 35.0647   2
  -4   0   3-0.87526 3.08168   4
  -4   0   2 1867.25 125.808   4
   4   0  -1 1.33671 2.74229   7
  -4   0   0 6513.99 425.159   6
  -4   0  -1-0.82902 2.91912   6
   4   0   1-1.57156 3.04886   5
   4   0   1-0.65316 3.19380   2
   4   0   2 3735.08 257.301   2
  -4   0  -2 4020.31 257.705   5
  -4   0  -2 3918.27 259.360   6
   4   0   2 4035.76 258.568   5
   4   0   3-0.62179 2.98299   2
   4   0   3 0.07980 0.81222   3
   4   0   3 2.10472 4.31576   5
  -4   0  -3 3.06942 3.06304   5
  -4   0  -4 2082.94 149.574   5
   4   0   4 2159.55 148.323   2
   4   0   5-0.65570 3.85271   2
  -4   0  -5 1.95618 4.31636   5
  -4   0  -6 33.3106 7.60935   5
   4   0   6 49.8425 6.96271   2
  -4   0  -6 48.1175 10.7974   1
  -4   0  -7-1.16520 5.25782   5
   4   0   7-0.66094 3.73150   2
  -4   0  -7-1.66608 6.83285   1
  -4   0  -8 76.0205 14.5410   1
  -4   0  -8 74.2523 11.9640   5
  -4   0  -9-7.46025 8.18549   5
   4   0   9-1.59049 5.98577   8
  -4   0  -9 7.47175 8.24319   1
  -4   0  -9-0.50430 1.22362   3
  -4   0 -10 398.357 27.1308   3
  -4   0 -10 384.477 37.6115   1
  -4   0 -10 411.433 36.6846   5
   4   0  10 504.487 39.0883   8
  -4   0 -11 10.8583 8.68180   5
   4   0  11-3.68704 8.13529   8
  -4   0 -11-4.14229 11.6916   1
  -4   0 -11-0.39178 2.29456   3
  -4   0 -12 684.776 56.1020   5
  -4   0 -12 697.532 58.1638   1
   4   0  12 714.951 56.9167   8
  -4   0 -12 670.421 45.2764   3
  -4   0 -13 5.95142 9.14366   5
   4   0  13-4.10654 9.85025   8
   4   0  14 421.676 41.5280   8
  -4   0 -14 458.045 43.5457   1
  -4   0 -15-2.43500 13.5542   1
  -4   0 -16 328.384 37.6216   1
  -4   0 -17 5.12402 13.8508   1
  -4   0 -18 15.5334 15.0482   1
   4  -1 -18 174.759 23.5178   3
   4   1 -18 167.870 23.2890   3
   4   1 -17-7.10131 10.6952   3
   4  -1 -17 12.2389 11.7475   3
   4   1 -16 406.127 36.5401   3
   4  -1 -16 342.859 34.2894   3
   4   1 -15 10.5965 10.3902   3
   4  -1 -15 6.52406 8.83105   3
   4   1 -14 356.333 31.8361   3
   4  -1 -14 258.702 28.3966   3
   4   1 -13 1.72409 8.74917   3
   4  -1 -13 13.5115 8.37076   3
   4  -1 -12 271.878 26.7565   3
   4  -1 -11 24.3974 9.24168   2
   4  -1 -11 30.6835 8.94706   7
   4  -1 -11 30.3761 9.54562   3
   4  -1 -10 50.7362 11.3187   2
   4   1 -10 55.0075 10.5871   2
   4  -1 -10 55.2225 10.1733   7
   4  -1 -10 62.2635 11.1004   3
   4  -1  -9 101.883 12.4809   7
   4  -1  -9 68.4828 12.1130   2
   4   1  -9 94.5765 11.7839   2
   4   1  -9 84.2918 12.2918   7
   4   1  -9 71.4863 7.38058   8
   4   1  -8 201.214 20.4021   7
   4  -1  -8 236.958 21.0889   7
   4  -1  -8 242.820 21.8733   2
   4   1  -8 169.114 20.3311   2
   4  -1  -7 21.8225 7.05052   2
   4  -1  -7 10.6585 5.86660   3
   4  -1  -7 21.1721 6.37051   8
   4   1  -7 22.1972 6.68939   7
   4  -1  -7 13.9979 5.51679   7
   4  -1  -6 1360.88 103.177   8
   4  -1  -6 1556.97 103.476   7
   4  -1  -6 1611.76 104.299   2
   4  -1  -5 23.9524 6.72736   2
  -4   1   5 26.5736 6.80848   4
  -4  -1   5 30.5897 6.42878   7
   4  -1  -5 43.1804 7.64053   8
  -4   1   4 1907.49 130.076   4
   4  -1  -4 2009.13 129.527   2
  -4  -1   4 1755.55 128.186   7
   4  -1  -4 2021.02 130.627   8
  -4   1   3 23.9458 5.73049   4
   4  -1  -3 24.2566 5.74187   2
   4   1  -2 2784.90 178.300   7
  -4   1   2 2587.73 178.570   4
   4   1  -1 1.28598 2.42121   7
   4   1   0 690.339 47.1992   7
   4   1   0 705.929 49.0730   1
  -4  -1   0 657.004 48.1382   6
   4   1   0 661.190 47.3553   5
  -4   1   0 633.346 48.0167   5
   4   1   1 457.467 30.1322   7
  -4  -1  -1 385.307 31.3138   6
   4  -1   1 412.935 31.2577   2
   4  -1   1 372.958 27.7534   3
   4   1   1 439.421 30.7098   5
  -4   1  -1 399.932 31.3011   5
   4  -1   1 402.295 31.9418   5
   4   1   2 65.7582 8.00715   5
  -4  -1  -2 49.5040 8.23520   6
  -4   1  -2 52.3413 7.75647   5
   4  -1   2 33.2904 7.78850   5
   4  -1   2 53.9053 4.45502   3
   4   1   2 55.1431 6.53322   7
   4  -1   2 55.9770 7.96128   2
   4   1   3 115.914 8.39300   3
   4   1   3 103.417 10.9106   2
   4  -1   3 115.608 12.3602   2
  -4   1  -3 124.804 13.2871   5
  -4  -1  -3 105.854 10.8784   5
  -4  -1  -3 109.847 13.8362   1
   4  -1   3 111.903 15.1996   5
   4   1   3 131.165 12.6788   5
   4   1   4 470.579 35.4151   5
   4  -1   4 485.490 45.1396   5
  -4  -1  -4 417.291 31.8933   5
  -4   1  -4 426.514 34.6389   5
   4   1   4 437.603 31.3460   2
   4  -1   4 385.156 32.5555   2
  -4  -1  -4 420.020 36.1976   1
   4  -1   4 456.830 35.1186   1
   4   1   4 427.668 28.4170   3
  -4   1  -5 21.3038 7.02926   5
  -4  -1  -5 11.9724 4.41501   5
   4   1   5 16.3747 10.0367   5
   4   1   5 13.0338 3.87398   2
   4  -1   5 13.3161 5.17725   2
   4   1   5 17.2980 2.06099   3
   4  -1   5 14.8484 7.43828   1
  -4   1  -6 1518.15 118.409   1
   4   1   6 1725.92 112.850   2
  -4  -1  -6 1645.92 114.479   5
  -4   1  -6 1638.49 118.319   5
   4  -1   6 1798.84 115.417   2
   4  -1   6 1773.13 119.690   8
  -4   1  -7 1.58560 5.96816   5
  -4  -1  -7 0.87607 3.86757   5
  -4   1  -7 1.59681 7.51245   1
   4   1   7 3.74521 3.22502   2
   4  -1   7-1.59729 5.82130   8
  -4  -1  -8 1191.41 75.5720   5
  -4   1  -8 1098.66 80.2345   5
   4   1   8 1151.20 71.3174   2
  -4  -1  -8 990.208 68.8061   3
  -4  -1  -8 998.036 79.3812   1
  -4   1  -8 1098.78 79.6724   1
   4  -1   8 1101.33 79.6672   8
  -4  -1  -9 20.2246 2.83915   3
  -4  -1  -9 16.3289 6.74022   5
  -4   1  -9 6.08284 8.39747   5
   4   1   9 21.7777 3.67712   7
   4  -1   9 5.52569 7.24054   8
  -4  -1  -9 13.7777 10.2102   1
  -4   1  -9 10.8585 9.08570   1
  -4  -1 -10 866.565 57.8729   5
  -4   1 -10 722.722 62.7822   5
   4  -1  10 724.399 61.3254   8
  -4  -1 -10 760.542 50.7004   3
   4   1  10 751.404 50.2883   7
  -4   1 -10 792.443 62.2406   1
  -4  -1 -10 721.619 62.1192   1
  -4   1 -11 17.0618 11.2384   5
  -4  -1 -11 2.52165 6.82120   5
  -4   1 -11-2.00244 9.97367   1
  -4  -1 -11-4.38944 10.3289   1
  -4  -1 -11 9.37734 3.00807   3
  -4   1 -11 3.76465 1.75945   3
   4  -1  11 2.09100 9.02039   8
   4   1  11 4.92126 7.56706   8
  -4   1 -12-2.57037 10.2617   5
  -4  -1 -12 2.66401 7.09174   5
   4   1  12 10.6123 8.48729   8
   4  -1  12 4.33501 9.34706   8
  -4   1 -12 4.18299 10.7795   1
  -4  -1 -12 4.58085 10.5586   1
  -4  -1 -12 1.87969 2.93894   3
  -4   1 -12 3.29039 2.32454   3
  -4  -1 -13 8.54069 3.71492   3
  -4   1 -13 2.67959 10.4025   5
  -4   1 -13-2.17496 11.7619   1
  -4  -1 -13-2.36882 10.9257   1
   4   1  13 1.86997 9.15074   8
   4  -1  13 23.8604 11.3699   8
  -4   1 -14 8.19287 11.8102   5
   4  -1  14 2.06777 10.6951   8
  -4  -1 -14 24.5668 14.2776   1
  -4   1 -14 13.5000 12.0101   1
   4   1  14 29.2548 11.9272   8
  -4  -1 -15-2.54395 12.2085   1
  -4   1 -15-6.95011 12.7135   1
  -4  -1 -16 112.786 22.2355   1
  -4   1 -16 106.763 21.1768   1
  -4  -1 -17 10.7809 14.5750   1
  -4   1 -17 4.83574 13.4668   1
  -4   1 -18 105.280 21.0706   1
   4   2 -18 56.2013 15.5712   3
   4  -2 -18 68.3301 18.4908   3
   4   2 -17 22.1974 12.3520   3
   4  -2 -17 11.6410 11.4490   3
   4   2 -16 33.6527 14.1437   3
   4  -2 -16 36.1393 11.7821   3
   4   2 -15 51.5463 13.5765   3
   4  -2 -15 32.5520 11.8549   3
   4  -2 -14 93.2613 15.4553   3
   4  -2 -13 32.1736 10.5029   3
   4  -2 -12 691.665 48.3666   7
   4  -2 -12 513.478 46.4420   3
   4  -2 -11 69.2947 11.4804   7
   4  -2 -11 57.3672 11.3111   3
   4  -2 -10 1030.98 56.2965   2
   4  -2 -10 913.551 51.5025   7
   4  -2  -9 1.48296 6.69173   2
   4  -2  -9 1.13548 5.34214   7
   4  -2  -8 1206.82 83.4120   7
   4  -2  -8 1145.96 85.1510   2
   4  -2  -7 56.6031 10.0716   8
   4  -2  -7 53.6549 9.00102   3
   4  -2  -7 59.2855 9.31561   7
   4  -2  -7 71.1086 11.7777   2
   4  -2  -6 519.784 39.1397   8
   4  -2  -6 526.729 38.6904   2
   4  -2  -6 433.439 35.0868   3
   4  -2  -6 400.829 34.7841   5
   4  -2  -6 463.972 35.8295   7
   4  -2  -5 287.742 26.6767   8
   4  -2  -5 302.625 25.7022   2
  -4  -2   5 183.638 23.1081   4
  -4   2   5 259.947 24.2007   4
   4  -2  -5 283.620 22.9518   3
   4  -2  -5 295.715 23.3417   5
  -4  -2   5 291.653 23.3143   7
   4  -2  -5 290.547 23.8165   7
   4  -2  -4 468.019 41.6724   8
   4  -2  -4 568.316 41.2251   2
  -4   2   4 558.331 39.9718   4
   4  -2  -4 520.577 37.9198   3
   4  -2  -4 474.731 38.3825   5
  -4  -2   4 518.099 38.6553   7
  -4   2   3 730.116 53.4699   4
   4  -2  -3 727.827 52.0819   3
   4  -2  -3 755.952 55.3970   2
   4  -2  -3 773.268 57.2504   8
   4  -2  -3 760.129 53.7318   5
   4  -2  -2 1364.16 90.7258   8
  -4   2   2 1279.30 86.4078   4
   4   2  -2 1242.83 85.8592   4
   4  -2  -2 1293.61 86.2443   4
   4  -2  -2 1267.44 85.9010   6
   4   2  -2 1359.99 86.5724   6
   4  -2  -2 1137.51 84.1396   3
   4   2  -2 1251.08 85.8667   7
  -4  -2   2 1246.65 85.3726   7
  -4  -2   1 161.534 13.4203   7
   4   2  -1 140.818 13.2918   7
  -4   2   1 166.248 14.8891   5
   4   2  -1 130.509 13.8134   1
   4   2  -1 141.190 13.4702   4
   4  -2  -1 145.285 13.4985   4
   4  -2  -1 146.302 14.0702   6
   4   2  -1 142.771 14.0860   6
  -4   2   1 167.258 15.5433   2
   4  -2  -1 127.950 11.8086   3
   4  -2  -1 172.766 18.2280   8
   4   2   0 3727.88 230.559   7
  -4   2   0 3436.45 232.127   5
   4   2   0 3495.49 231.877   6
   4   2   0 3544.98 231.854   1
   4  -2   0 3588.97 230.751   4
   4   2   0 3449.26 230.625   4
  -4   2   0 3749.90 233.051   2
   4  -2   0 3526.08 228.262   3
  -4   2   0 3188.03 230.864   6
  -4  -2   0 3437.23 231.286   6
   4  -2   0 3455.61 235.547   8
  -4   2  -1 75.5412 10.5860   5
   4   2   1 85.5836 9.24844   5
   4   2   1 94.8545 9.14540   7
   4   2   1 94.2199 11.5160   1
   4  -2   1 83.6187 11.0773   2
  -4   2  -1 79.8330 10.4346   2
   4  -2   1 99.3622 7.60270   3
  -4   2  -1 70.1873 9.69130   6
  -4  -2  -1 91.9121 10.5277   6
  -4  -2  -2 2586.79 180.615   6
   4   2   2 2775.11 178.586   5
  -4   2  -2 2678.97 181.796   5
  -4   2  -2 2416.55 180.219   6
   4  -2   2 2925.75 185.343   5
  -4  -2  -2 2878.98 182.543   1
   4   2   2 2797.77 176.140   3
   4   2   2 2878.39 177.635   7
   4  -2   2 2659.37 175.280   3
   4  -2   2 2488.92 180.658   2
  -4   2  -2 2623.39 180.592   2
   4   2   3 4.25076 1.85711   3
   4  -2   3 3.46551 1.00728   3
   4   2   3 0.68102 3.57442   5
  -4   2  -3 3.58800 4.50652   5
   4   2   3 2.39219 2.32314   7
   4  -2   3 3.03485 4.26229   2
  -4   2  -3 8.32427 4.44279   2
  -4  -2  -3 2.55226 4.49790   1
   4  -2   3 3.93742 4.72758   1
   4   2   4 2949.67 189.827   3
  -4   2  -4 2785.80 197.112   5
   4   2   4 3097.37 194.318   5
   4   2   4 3007.65 190.827   7
   4  -2   4 2877.87 195.408   2
  -4   2  -4 2667.41 194.305   2
  -4  -2  -4 2724.45 197.610   1
   4  -2   4 2966.35 195.853   1
   4   2   5 57.0613 4.97119   3
  -4  -2  -5 51.0103 10.4619   1
   4  -2   5 62.6626 10.4248   1
   4  -2   5 56.0226 9.94876   2
  -4   2  -5 75.7526 11.8832   5
   4   2   5 47.9466 10.4157   5
   4   2   5 53.7352 5.28345   7
  -4   2  -5 34.9620 7.40027   2
   4  -2   5 61.5077 11.6700   8
   4   2   6 140.573 10.7935   7
   4   2   6 158.683 11.1058   3
  -4   2  -6 153.553 19.3565   5
   4   2   6 148.178 12.8036   2
  -4   2  -6 138.404 14.2647   2
  -4  -2  -6 153.128 12.9671   5
  -4  -2  -6 103.109 17.6697   1
   4  -2   6 160.724 19.8184   8
  -4  -2  -7 519.149 35.7799   5
  -4   2  -7 492.174 44.3840   5
   4   2   7 449.556 34.3788   2
  -4   2  -7 524.615 36.8348   2
  -4  -2  -7 472.844 33.3260   3
   4   2   7 506.882 33.6356   3
   4  -2   7 515.423 43.9750   8
  -4  -2  -8 40.7620 6.66590   5
  -4   2  -8 32.6062 13.4048   5
  -4  -2  -8 40.5100 4.70147   3
   4  -2   8 28.5247 10.9887   8
   4   2   8 44.5930 5.74804   2
  -4  -2  -9 297.885 24.7127   5
   4   2   9 353.289 22.6144   2
  -4  -2  -9 294.370 22.3214   3
  -4  -2  -9 321.299 33.2827   1
   4  -2   9 288.754 32.3217   8
  -4   2  -9 292.136 34.5630   5
  -4   2 -10 335.657 38.3550   5
  -4   2 -10 323.455 33.7236   1
  -4  -2 -10 339.991 35.7892   1
  -4  -2 -10 348.392 25.3887   3
   4  -2  10 370.618 36.6619   8
  -4  -2 -10 405.875 28.5051   5
  -4  -2 -11 3.05388 5.03301   5
  -4   2 -11 9.24290 11.2287   5
  -4  -2 -11 6.93235 9.72525   1
  -4   2 -11 9.56234 10.1809   1
  -4  -2 -11 3.35017 3.10102   3
   4  -2  11-4.58348 9.40106   8
  -4   2 -12 542.046 60.5929   5
   4   2  12 853.179 57.3360   8
   4  -2  12 755.433 59.2623   8
  -4  -2 -12 787.912 46.5553   3
  -4   2 -12 626.739 44.0337   3
  -4   2 -12 765.957 57.8073   1
  -4  -2 -12 738.835 60.5246   1
   4   2  13 10.3190 10.7386   8
  -4  -2 -13 10.1302 13.2708   1
  -4   2 -13 3.41295 13.2438   5
  -4  -2 -13 5.58225 4.07442   3
   4  -2  13-2.22479 9.82372   8
  -4   2 -14 329.516 33.7864   1
  -4  -2 -14 391.335 38.3214   1
   4   2  14 347.781 32.2416   8
   4  -2  14 298.396 32.5792   8
  -4  -2 -15-2.71135 13.0084   1
  -4  -2 -16 182.609 29.3844   1
  -4  -2 -17 8.49209 14.1030   1
   4   3 -18 116.915 20.1524   3
   4   3 -17-7.77859 13.0669   3
   4  -3 -17 3.53493 11.1562   3
   4   3 -16 298.506 30.8993   3
   4  -3 -16 218.017 27.8640   3
   4  -3 -15-3.70956 10.1781   3
   4  -3 -14 353.075 33.3323   3
   4  -3 -13 79.6687 13.4602   7
   4  -3 -13 51.7046 11.4247   3
   4  -3 -12 295.324 29.6391   3
   4  -3 -12 379.372 30.8881   7
   4  -3 -11 301.465 29.5789   3
   4  -3 -11 397.428 31.2073   7
   4  -3 -10 56.4617 10.9789   7
   4  -3  -9 532.285 41.4710   7
   4  -3  -9 520.511 45.1438   2
   4  -3  -8 325.107 30.7960   3
   4  -3  -8 387.609 35.6868   2
   4  -3  -7 29.1075 6.81491   3
   4  -3  -7 38.1110 8.00430   7
   4  -3  -7 23.9098 9.45663   2
   4  -3  -7 31.1397 7.26857   5
   4  -3  -6 1839.67 120.962   7
  -4   3   6 1959.14 121.818   2
   4  -3  -6 1542.67 122.591   2
   4  -3  -6 1652.73 119.068   3
   4  -3  -6 1720.87 119.905   5
   4  -3  -6 2000.93 126.232   8
   4  -3  -5 4.32506 5.75549   2
  -4   3   5 3.08142 3.98561   2
   4  -3  -5 2.76336 4.24667   5
   4  -3  -5 3.63728 3.28377   3
  -4  -3   5-1.27660 4.65273   4
  -4   3   5-1.06748 4.01844   4
   4  -3  -5-1.76077 6.62706   8
  -4  -3   4 1136.86 72.3046   4
  -4   3   4 985.781 70.4681   4
   4  -3  -4 979.627 68.6528   3
   4  -3  -4 847.557 72.3692   2
  -4   3   4 1075.75 71.7901   2
   4  -3  -4 947.613 76.2704   8
   4  -3  -4 1000.27 70.6647   5
  -4  -3   3 327.890 26.7162   4
  -4   3   3 300.499 25.7765   4
   4  -3  -3 340.804 24.7341   3
   4  -3  -3 315.091 29.0162   2
   4  -3  -3 332.004 27.4547   5
   4  -3  -3 321.573 31.6760   8
   4   3  -2 1507.38 105.111   7
  -4  -3   2 1540.85 104.408   7
   4  -3  -2 1635.35 107.205   5
   4   3  -2 1480.56 104.201   1
   4   3  -2 1569.40 104.638   4
  -4   3   2 1422.61 104.585   4
  -4  -3   2 1531.98 105.333   4
   4  -3  -2 1590.24 104.684   6
   4   3  -2 1639.91 105.387   6
   4  -3  -2 1608.97 103.253   3
   4  -3  -2 1443.74 111.728   8
   4  -3  -1 650.162 58.2052   8
  -4   3   1 705.533 54.6255   2
   4   3  -1 764.377 52.6855   1
   4   3  -1 735.622 51.7742   4
   4  -3  -1 737.970 51.8429   4
   4  -3  -1 726.407 52.2537   6
   4   3  -1 741.589 52.6440   6
   4  -3  -1 825.114 50.8921   3
   4   3  -1 700.902 52.0703   7
  -4  -3   1 676.221 51.1948   7
  -4  -3   0 431.006 29.7009   7
   4   3   0 420.759 30.4830   7
  -4   3   0 469.401 33.6055   5
   4   3   0 431.281 31.8441   1
   4   3   0 435.637 30.5075   4
   4  -3   0 397.803 30.0936   4
   4  -3   0 437.374 37.8091   8
   4  -3   0 360.244 27.7209   3
  -4   3   0 390.634 30.4673   6
  -4  -3   0 376.525 30.3956   6
  -4   3   0 340.062 32.2658   2
  -4   3  -1 927.686 66.2123   5
  -4  -3  -1 957.453 65.6208   1
  -4   3  -1 945.049 66.3563   2
  -4  -3  -1 892.933 63.4621   6
  -4   3  -1 855.864 63.4245   6
  -4  -3  -1 931.984 61.4694   7
   4   3   1 875.125 61.9730   7
   4  -3   1 898.261 59.8281   3
  -4   3  -1 878.988 61.0597   3
   4   3   2 50.9016 5.20236   3
  -4   3  -2 34.5267 6.96599   6
  -4  -3  -2 38.4743 7.13422   6
   4   3   2 46.3664 6.24687   5
  -4   3  -2 37.2425 8.40170   5
  -4   3  -2 36.0595 4.89652   3
   4  -3   2 48.0406 4.40020   3
   4   3   2 52.2148 6.14312   7
  -4   3  -2 29.2619 8.02478   2
  -4  -3  -2 33.0236 7.79489   1
   4  -3   2 54.7915 9.27653   2
   4   3   3 475.616 32.9593   3
   4  -3   3 476.761 32.1305   3
  -4   3  -3 470.690 38.7309   2
   4   3   3 467.124 34.7974   5
  -4   3  -3 451.487 39.4368   5
   4   3   3 500.269 34.1282   7
   4  -3   3 555.839 40.9402   2
  -4  -3  -3 522.453 40.2028   1
  -4   3  -3 478.493 32.8388   3
   4   3   4 210.618 18.4723   5
  -4   3  -4 229.739 24.0701   5
  -4   3  -4 226.060 15.9826   3
   4   3   4 260.157 16.9016   3
  -4   3  -4 190.104 21.2718   2
   4  -3   4 215.809 21.1243   1
  -4  -3  -4 261.608 24.3266   1
   4  -3   4 177.971 24.0686   8
   4  -3   5 48.8505 12.2107   8
   4   3   5 35.4327 7.41170   5
  -4   3  -5 26.7829 9.46463   5
   4   3   5 38.6457 4.33561   3
  -4  -3  -5 27.7717 8.86464   1
   4  -3   5 39.0050 9.19254   1
  -4   3  -5 30.5356 7.52528   2
  -4   3  -6 1278.15 99.6121   5
   4  -3   6 1173.21 97.1533   8
  -4   3  -6 1194.31 91.0804   2
  -4  -3  -6 1165.47 95.0467   1
   4  -3   6 1376.31 92.7364   1
   4   3   6 1369.46 86.1905   3
  -4   3  -7 16.3844 6.38221   2
  -4  -3  -7 19.0262 10.0999   1
  -4   3  -7 35.9807 12.4374   5
   4   3   7 31.1740 4.21436   3
   4  -3   7 25.2190 11.1195   8
  -4  -3  -7 23.3000 4.05439   3
  -4   3  -8 569.443 51.9606   5
   4   3   8 446.614 36.0424   2
  -4   3  -8 554.116 40.2323   2
  -4  -3  -8 539.884 36.3349   3
   4   3   8 563.888 36.5309   3
   4  -3   8 544.172 48.2499   8
  -4   3  -9 51.7480 18.2529   5
  -4  -3  -9 55.9713 6.17310   3
  -4   3  -9 63.8410 8.41406   2
   4   3   9 33.7670 5.34195   2
   4  -3   9 60.2675 14.6581   8
   4  -3  10 515.319 51.3189   8
  -4  -3 -10 623.450 40.6116   3
  -4  -3 -10 576.999 51.5398   1
  -4   3 -11 128.606 27.1599   5
  -4  -3 -11 179.356 12.9215   3
  -4   3 -11 129.042 9.57956   3
  -4  -3 -11 174.672 24.0672   1
   4  -3  11 146.167 22.2678   8
  -4   3 -11 140.620 9.73225   3
  -4  -3 -12 34.0953 5.91243   3
  -4   3 -12 24.5427 2.95214   3
   4  -3  12 18.9214 11.8885   8
  -4  -3 -12 40.9290 14.7310   1
  -4   3 -12 3.95260 14.4957   5
  -4  -3 -13 198.787 16.0554   3
  -4  -3 -13 203.887 27.9942   1
   4  -3  13 162.615 24.3985   8
  -4   3 -14-4.13095 16.0257   5
   4   3  14 5.04909 9.89038   8
   4  -3  14 4.23903 10.1697   8
  -4  -3 -14 2.78712 13.3720   1
  -4  -3 -15 60.6403 18.5318   1
  -4   3 -15 4.12543 17.4701   5
  -4  -3 -16 94.8230 23.4584   1
  -4  -3 -17 3.01206 17.2387   1
   4  -4 -17 57.3511 13.9976   3
   4   4 -17 90.2804 18.7430   3
   4  -4 -16 22.9760 11.3379   3
   4  -4 -15 230.452 25.4561   3
   4  -4 -14 111.296 18.4347   3
   4  -4 -14 150.194 18.2974   7
   4  -4 -13 103.700 16.0201   3
   4  -4 -13 97.2083 15.4259   7
   4  -4 -12 525.058 43.7932   3
   4  -4 -12 499.592 41.6831   7
   4  -4 -11 4.27927 7.11753   3
   4  -4 -11 12.5374 8.35457   7
   4  -4 -10 372.408 31.8126   7
   4  -4  -9 10.3445 6.69935   7
   4  -4  -8 372.734 32.9801   7
   4  -4  -8 391.186 32.7374   3
  -4   4   8 440.498 33.5265   2
   4  -4  -7 233.802 20.2712   3
  -4   4   7 199.275 20.0638   2
   4  -4  -7 189.123 20.1031   7
   4  -4  -7 225.386 20.5416   5
  -4  -4   6 178.839 19.2665   4
   4  -4  -6 161.850 15.9062   3
   4  -4  -6 183.260 17.2556   5
  -4   4   6 173.510 17.5156   2
  -4   4   5 724.118 57.0957   4
  -4  -4   5 806.119 59.4497   4
  -4   4   5 789.104 58.3318   2
   4  -4  -5 640.891 59.9523   2
   4  -4  -5 867.946 56.8040   3
   4  -4  -5 839.458 58.2901   5
   4  -4  -4 169.939 14.1554   3
   4  -4  -4 116.870 14.2673   5
   4  -4  -4 137.121 18.3002   2
  -4  -4   4 148.151 15.0390   4
  -4   4   4 112.776 12.9839   4
   4  -4  -4 113.254 19.3413   8
  -4   4   4 120.540 14.6474   2
   4   4  -4 125.456 11.7571   1
  -4   4   4 107.512 14.8038   8
   4  -4  -3 1050.61 66.7503   6
   4  -4  -3 974.361 69.0218   5
  -4   4   3 1064.51 68.7303   5
   4   4  -3 1020.11 65.7396   1
  -4  -4   3 1088.89 68.4018   4
  -4   4   3 966.160 66.9795   4
  -4  -4   3 959.648 67.2907   7
   4  -4  -3 1062.92 65.9001   3
  -4   4   3 982.312 70.6438   8
   4  -4  -3 1233.48 80.1365   8
   4  -4  -2 574.025 51.5212   8
  -4   4   2 576.473 47.0129   8
   4   4  -2 575.420 42.9701   6
   4  -4  -2 567.027 42.3523   6
  -4   4   2 548.353 44.0327   5
   4  -4  -2 597.369 45.8835   5
  -4   4   2 552.985 42.7662   4
  -4  -4   2 552.298 42.9963   4
   4  -4  -2 609.552 41.1314   3
  -4  -4   2 633.236 43.1927   7
   4   4  -2 626.110 42.5284   1
   4  -4  -1 231.110 26.4600   8
  -4   4   1 247.241 23.7804   8
  -4   4   1 206.034 21.3521   2
   4   4  -1 185.370 17.5857   4
   4  -4  -1 214.037 18.0610   4
   4  -4  -1 183.169 15.8879   3
  -4   4   1 220.156 17.1485   3
  -4  -4   1 221.078 18.0897   7
   4   4  -1 236.050 19.0636   6
   4  -4  -1 203.678 18.0841   6
  -4  -4   0 3372.77 205.430   6
  -4   4   0 2916.09 204.823   6
   4  -4   0 3357.67 217.416   8
  -4  -4   0 3058.87 206.374   1
   4   4   0 3126.85 204.363   4
   4  -4   0 3075.59 204.462   4
  -4  -4   0 3105.63 204.087   7
  -4   4   0 3118.55 210.228   2
   4  -4   0 2944.17 202.342   3
  -4   4   0 3255.26 203.334   3
  -4   4  -1 187.621 17.1274   6
  -4  -4  -1 171.015 16.5709   6
  -4   4  -1 163.099 19.2814   5
  -4  -4  -1 193.290 19.1438   1
   4  -4   1 177.503 16.4250   4
  -4   4  -1 198.042 20.7663   2
   4  -4   1 186.702 14.2057   3
  -4   4  -1 189.422 14.6557   3
   4   4   1 190.489 15.0110   3
  -4  -4  -1 196.277 15.5997   7
  -4  -4  -2 1088.43 83.0180   1
  -4   4  -2 1197.46 85.8224   2
  -4   4  -2 1147.12 81.3080   6
  -4  -4  -2 1034.25 80.4667   6
  -4   4  -2 1032.22 83.9235   5
  -4   4  -2 1195.06 77.4102   3
   4  -4   2 1119.54 76.8372   3
   4   4   2 1294.45 77.9092   3
  -4  -4  -2 1207.21 78.2346   7
  -4   4  -3 216.345 14.8646   3
  -4   4  -3 197.942 21.7617   2
  -4   4  -3 192.863 21.9379   5
   4   4   3 201.494 16.0784   5
   4  -4   3 193.501 14.3288   3
   4   4   3 184.273 14.9250   3
  -4  -4  -3 173.059 20.2775   1
   4   4   4 1360.27 98.3061   5
  -4   4  -4 1307.44 106.790   5
   4   4   4 1506.09 97.3673   3
  -4   4  -4 1683.54 97.1358   3
  -4   4  -4 1271.69 104.408   2
   4  -4   4 1388.15 101.813   1
  -4  -4  -4 1205.25 103.870   1
  -4   4  -5 760.795 64.4084   5
   4   4   5 805.873 54.0920   5
   4  -4   5 831.385 57.6856   1
  -4  -4  -5 636.715 59.4106   1
  -4   4  -5 639.872 58.8246   2
   4   4   5 826.412 52.2854   3
  -4   4  -5 759.341 51.1624   3
   4  -4   5 788.212 65.4024   8
  -4   4  -6 84.8182 14.3913   2
   4  -4   6 114.143 19.2034   8
  -4   4  -6 158.217 22.3857   5
  -4   4  -6 116.099 8.68612   3
   4   4   6 120.224 9.97749   3
   4  -4   6 129.417 15.3510   1
  -4  -4  -6 96.8915 16.3872   1
   4  -4   7 541.620 48.9027   8
  -4  -4  -7 500.944 35.9860   3
  -4   4  -7 371.745 40.1530   2
  -4   4  -7 532.226 51.2057   5
  -4   4  -7 500.035 33.8271   3
   4   4   7 648.841 36.7940   3
  -4  -4  -7 401.486 43.2688   1
  -4  -4  -8 210.379 25.8046   1
  -4   4  -8 135.555 28.0625   5
  -4   4  -8 161.099 19.6383   2
  -4  -4  -8 183.834 15.7075   3
   4  -4   8 222.668 27.1369   8
   4   4   8 201.026 15.6676   3
  -4   4  -8 199.841 13.6131   3
   4  -4   9 105.245 19.2454   8
  -4   4  -9 110.469 25.4681   5
  -4   4  -9 105.112 13.3617   2
   4   4   9 63.1017 7.98679   2
  -4  -4  -9 103.716 9.49719   3
   4   4   9 115.776 9.92375   3
  -4   4  -9 57.2960 7.27208   3
  -4   4  -9 111.807 7.04543   3
  -4   4 -10 223.762 38.4159   5
   4   4  10 166.076 19.0916   2
  -4   4 -10 406.234 26.4108   2
  -4  -4 -10 385.314 22.7499   3
  -4   4 -10 359.070 19.2988   3
  -4   4 -10 283.767 19.6313   3
   4  -4  10 329.644 34.3788   8
  -4   4 -11 28.5115 4.12691   3
  -4   4 -11 30.0890 3.52621   3
  -4  -4 -11 25.8009 5.83100   3
  -4   4 -11 22.0487 19.9886   5
   4  -4  11 37.8199 13.5541   8
  -4   4 -11 35.2951 7.21012   2
  -4  -4 -11 32.9054 13.8129   1
  -4  -4 -12 316.738 23.1542   3
   4  -4  12 286.612 33.0062   8
  -4  -4 -12 283.015 35.4473   1
  -4  -4 -13 1.88625 5.25827   3
  -4  -4 -13-5.63321 14.0224   1
  -4   4 -13 4.71732 16.6064   5
  -4  -4 -14 109.366 22.5052   1
  -4   4 -14 4.74945 20.7566   5
  -4  -4 -15 33.7387 16.8896   1
  -4   4 -15 9.47682 18.4390   5
  -4  -4 -16 148.136 27.3965   1
   4  -5 -17 17.1318 11.4506   3
   4  -5 -16 114.907 18.1588   3
   4  -5 -15 3.16787 9.06697   3
   4  -5 -14 65.9299 13.4951   3
   4  -5 -14 92.6534 14.9102   7
   4  -5 -13 174.395 20.5091   3
   4  -5 -13 187.566 20.5610   7
   4  -5 -12 99.6436 14.7065   3
   4  -5 -12 111.681 15.1158   7
   4  -5 -11 212.492 22.7180   3
   4  -5 -11 246.675 23.3300   7
   4  -5 -10 1.21912 6.78616   7
   4  -5  -9 806.035 60.3208   7
  -4   5   9 813.669 60.2470   2
   4  -5  -8 82.9133 11.4908   7
  -4   5   8 63.4142 10.7133   2
   4  -5  -8 53.1127 9.82223   3
   4  -5  -7 514.460 39.4866   5
   4  -5  -7 493.827 37.2060   3
  -4   5   7 511.041 39.3573   2
  -4   5   7 461.711 37.5697   8
   4   5  -7 467.230 32.7803   1
   4  -5  -6 890.031 67.2522   5
  -4   5   6 963.144 68.0937   8
  -4   5   6 905.402 67.7050   2
  -4  -5   6 956.918 69.4338   4
  -4   5   6 810.983 66.0075   4
   4  -5  -6 910.496 64.8370   3
   4   5  -6 948.517 61.3915   1
  -4   5   5 59.6778 11.2260   2
   4  -5  -5 66.3883 11.0356   5
  -4  -5   5 86.1342 11.8901   4
  -4   5   5 54.5645 9.08177   4
  -4   5   5 64.5921 12.2273   8
   4  -5  -5 75.2491 9.08629   3
  -4  -5   4 644.951 46.0997   4
  -4   5   4 543.238 43.9514   4
   4  -5  -4 567.256 43.1009   3
  -4   5   4 628.243 48.7623   2
  -4   5   4 680.938 50.1971   8
   4  -5  -4 643.714 47.8748   5
   4  -5  -3 230.770 24.1456   5
  -4  -5   3 278.611 22.1132   4
  -4   5   3 239.927 20.6487   4
   4  -5  -3 263.189 20.6466   6
   4  -5  -3 253.177 19.7360   3
  -4   5   3 239.267 20.3772   3
  -4   5   3 226.046 25.3199   8
   4  -5  -3 274.690 31.2235   8
  -4   5   3 199.136 21.4770   5
  -4  -5   2 809.438 56.1804   7
  -4   5   2 742.378 57.5995   5
   4  -5  -2 883.024 61.7842   5
   4   5  -2 857.628 55.9784   6
   4  -5  -2 778.099 54.9803   6
   4  -5  -2 709.887 53.3816   3
  -4   5   2 777.432 54.2161   3
   4  -5  -2 903.030 69.3132   8
  -4   5   2 681.489 61.0733   8
   4  -5  -1 908.672 67.5509   3
   4   5  -1 946.197 69.9322   6
   4  -5  -1 1073.56 70.1758   6
  -4   5   1 969.122 72.9403   5
   4  -5  -1 1215.78 79.3054   5
   4  -5  -1 1015.62 69.6156   4
   4   5  -1 1046.25 69.4272   4
  -4   5   1 1011.91 76.0744   2
   4  -5  -1 1017.74 82.7410   8
  -4   5   1 966.744 77.4181   8
  -4  -5   1 1048.79 70.0137   7
  -4   5   0 302.587 21.7931   3
   4  -5   0 284.623 21.3123   3
  -4  -5   0 304.676 24.8469   1
   4  -5   0 306.995 32.7060   5
   4  -5   0 273.943 22.6215   4
   4   5   0 288.013 22.5869   4
  -4   5   0 274.772 28.5862   2
   4   5   0 253.984 22.1071   3
  -4  -5   0 298.207 23.1193   7
   4  -5   0 306.076 33.9300   8
  -4   5   0 271.014 30.2243   8
  -4  -5  -1 1726.76 116.466   7
   4   5   1 1701.03 115.656   3
   4  -5   1 1850.15 115.083   3
   4   5   1 1663.29 116.796   4
   4  -5   1 1662.23 116.808   4
  -4   5  -1 1694.67 124.917   2
  -4  -5  -1 1724.79 117.757   6
  -4   5  -1 1646.49 117.461   6
  -4  -5  -1 1799.76 120.336   1
  -4   5  -1 1850.20 115.555   3
  -4  -5  -2 15.0340 4.23280   7
  -4   5  -2 8.09649 4.35667   6
  -4  -5  -2 5.94485 4.41678   6
   4   5   2 10.8328 3.80551   3
   4  -5   2 8.55862 2.56702   3
  -4   5  -2 1.76516 6.66958   5
  -4   5  -2 9.50904 7.82205   2
  -4   5  -2 10.6352 3.61162   3
  -4  -5  -2 7.86285 5.81363   1
  -4   5  -3 1475.16 95.5625   3
  -4  -5  -3 1400.90 99.7874   6
  -4   5  -3 1247.32 105.234   5
  -4  -5  -3 1343.42 102.751   1
  -4   5  -3 1215.56 104.693   2
  -4  -5  -3 1545.29 96.1718   7
   4  -5   3 1374.74 95.2170   3
   4   5   3 1564.02 96.1880   3
  -4  -5  -4 116.044 17.2479   1
  -4   5  -4 134.050 19.9766   5
   4   5   4 150.739 11.8628   5
  -4   5  -4 141.588 10.8652   3
   4   5   4 118.513 11.2790   3
  -4   5  -4 119.172 18.2444   2
   4  -5   5 432.718 44.1516   8
  -4   5  -5 430.511 40.2285   2
  -4   5  -5 424.290 43.5758   5
   4   5   5 446.234 30.9832   5
  -4   5  -5 422.716 29.8232   3
   4   5   5 445.212 30.7829   3
   4  -5   5 451.733 35.6230   1
  -4  -5  -5 378.930 37.9550   1
   4  -5   6 475.843 49.2597   8
  -4   5  -6 499.849 52.5506   5
  -4   5  -6 467.896 45.8353   2
  -4   5  -6 541.502 36.4312   3
   4   5   6 568.877 37.6348   3
   4  -5   6 587.040 43.0529   1
  -4  -5  -6 436.977 45.2618   1
  -4   5  -7 59.2567 13.9262   2
   4  -5   7 66.3595 16.6266   8
  -4  -5  -7 59.6174 7.81391   3
   4   5   7 74.1087 7.77346   3
  -4   5  -7 73.8839 6.32979   3
  -4  -5  -8 305.996 23.4217   3
   4  -5   8 298.260 34.6985   8
   4   5   8 345.165 23.2456   3
  -4   5  -8 305.698 21.0944   3
  -4   5  -9 110.350 16.8171   2
  -4   5  -9 112.090 9.18046   3
   4   5   9 124.577 11.7065   3
  -4   5  -9 86.6745 26.8270   5
   4  -5   9 133.891 22.5993   8
  -4  -5  -9 114.246 11.6480   3
  -4   5 -10 435.066 27.4126   3
  -4  -5 -10 392.925 30.0272   3
  -4   5 -10 377.981 34.4025   2
   4  -5  10 380.717 41.6156   8
  -4   5 -11 292.760 24.1339   2
  -4  -5 -11 294.826 20.8454   3
   4  -5  11 291.086 32.0944   8
  -4   5 -11 215.053 18.2291   3
  -4  -5 -12 27.6610 6.64728   3
  -4   5 -12 5.12495 19.9484   5
  -4  -5 -13 564.292 38.0599   3
  -4  -5 -13 637.154 54.2423   1
  -4   5 -14-5.27596 20.4698   5
  -4  -5 -14-6.21652 16.2866   1
  -4   5 -15 31.5393 26.6745   5
  -4  -5 -15 123.249 25.1387   1
  -4   5 -16 5.09466 23.5917   5
  -4  -5 -16 60.5126 21.5720   1
   4  -6 -16 18.4220 11.5321   3
   4  -6 -15 342.626 29.3940   7
   4  -6 -15 238.700 27.9889   3
   4  -6 -14 44.3753 11.8907   3
   4  -6 -14 70.2766 13.3363   7
   4  -6 -13 81.0073 14.3648   3
   4  -6 -13 101.710 15.2565   7
   4  -6 -12 299.821 25.5487   7
   4  -6 -12 197.308 23.2370   3
   4  -6 -11 47.1261 10.6309   3
   4  -6 -11 41.7908 10.5072   7
   4  -6 -10 269.029 24.9664   7
  -4   6  10 243.312 24.4299   2
   4  -6  -9 11.2476 7.64036   7
  -4   6   9 6.59495 6.81981   2
   4  -6  -8 87.7145 11.6633   3
  -4   6   8 57.1702 11.2107   8
  -4   6   8 92.5997 13.7334   2
  -4  -6   7 477.071 42.1986   4
  -4   6   7 429.017 38.5535   4
   4  -6  -7 494.667 37.7007   3
  -4   6   7 511.541 40.6103   8
  -4   6   7 522.748 41.0621   2
   4  -6  -6 50.2175 8.04428   3
  -4  -6   6 53.7850 10.6315   4
  -4   6   6 33.0933 8.11070   4
  -4   6   6 45.0389 10.4226   2
  -4   6   6 46.0454 10.7424   8
  -4   6   5 969.620 72.5456   2
   4  -6  -5 869.099 66.4241   3
  -4   6   5 979.749 73.3484   8
  -4  -6   5 1058.71 70.3849   4
  -4   6   5 967.528 67.7598   4
  -4   6   4 94.8210 12.0163   5
  -4   6   4 82.6867 10.0719   4
  -4  -6   4 88.0926 11.2581   4
  -4   6   4 73.3753 13.2144   2
   4  -6  -4 79.2379 9.85216   6
   4  -6  -4 86.7478 9.76964   3
  -4   6   4 69.0821 15.1242   8
  -4   6   3 1315.14 94.2460   8
   4  -6  -3 1200.29 83.7601   6
  -4   6   3 1228.25 87.4421   5
  -4  -6   3 1302.58 85.5244   4
  -4   6   3 1205.03 84.2870   4
   4  -6  -3 1190.65 83.3912   3
   4   6  -2 227.021 20.0294   6
   4  -6  -2 216.381 19.4171   6
  -4   6   2 226.292 22.5194   5
  -4   6   2 226.676 18.9386   3
   4  -6  -2 236.736 18.5766   3
  -4   6   1 421.276 31.7627   3
   4  -6  -1 423.722 31.4307   3
  -4   6   1 378.448 36.3953   5
  -4  -6   1 476.709 33.8298   1
   4   6  -1 439.063 32.5208   4
  -4  -6   1 433.893 33.4879   7
  -4   6   1 449.845 40.4643   2
   4  -6   0 765.606 63.6278   8
  -4  -6   0 724.871 50.5720   1
   4   6   0 670.537 47.4377   4
   4  -6   0 717.275 47.9368   4
   4  -6   0 676.559 46.6238   3
  -4   6   0 601.574 55.5176   2
  -4  -6   0 666.576 48.3659   7
   4   6   0 600.550 47.0823   3
  -4  -6  -1 97.7049 10.8904   6
  -4   6  -1 112.591 11.4684   6
  -4   6  -1 87.2988 16.1661   2
   4  -6   1 95.1342 9.29695   3
   4   6   1 95.0374 10.0887   3
   4   6   1 94.0642 10.5577   4
   4  -6   1 102.557 11.0379   4
   4  -6   1 106.168 20.2141   8
  -4  -6  -1 112.638 11.2447   7
  -4  -6  -1 119.276 14.7784   1
  -4  -6  -2 417.621 36.0338   6
  -4   6  -2 480.924 37.0861   6
  -4  -6  -2 527.970 40.9355   1
  -4   6  -2 440.379 42.7071   5
  -4   6  -2 454.195 44.5517   2
  -4   6  -2 523.902 34.5571   3
   4  -6   2 455.882 34.0157   3
   4   6   2 531.653 35.1473   3
   4  -6   2 515.385 49.9068   8
  -4  -6  -2 490.650 35.4443   7
  -4  -6  -3 347.445 23.9976   7
  -4   6  -3 275.035 32.5498   5
  -4   6  -3 327.663 33.9463   2
  -4   6  -3 323.776 27.2825   6
  -4  -6  -3 269.668 25.6588   6
  -4   6  -3 312.060 23.1350   3
   4  -6   3 319.846 23.1607   3
   4   6   3 322.797 23.7313   3
  -4  -6  -3 284.264 29.2917   1
  -4   6  -4 374.191 26.7007   3
   4   6   4 427.489 27.9087   3
  -4   6  -4 283.372 36.8771   5
  -4   6  -4 381.685 38.5544   2
   4   6   4 343.079 26.9799   5
  -4  -6  -4 393.452 26.8823   7
  -4  -6  -4 306.294 33.0242   1
   4   6   5 806.305 52.8892   5
  -4   6  -5 737.934 68.6570   5
  -4   6  -5 781.365 52.7913   3
   4   6   5 771.038 53.4683   3
  -4   6  -5 695.966 64.0827   2
   4  -6   5 781.845 57.8564   1
   4  -6   5 756.357 68.5570   8
  -4   6  -6 14.2481 9.50454   2
  -4   6  -6 7.24941 12.3157   5
   4   6   6 8.29564 4.06296   3
  -4   6  -6 12.1237 3.57891   3
   4  -6   6 17.9004 11.5942   8
  -4   6  -7 825.598 80.4823   5
  -4   6  -7 815.779 71.6778   2
  -4  -6  -7 811.370 61.7536   3
  -4   6  -7 946.676 59.8332   3
   4  -6   7 935.149 77.3009   8
  -4   6  -8 3.93727 3.25785   3
  -4  -6  -8 0.67801 4.55944   3
  -4   6  -8 4.44125 15.0669   5
   4  -6   8 5.75522 8.98130   8
  -4   6  -8 4.54593 9.80161   2
  -4   6  -9 239.452 29.3478   2
  -4  -6  -9 259.983 21.8906   3
   4  -6   9 314.043 34.8870   8
  -4   6  -9 272.776 19.4233   3
  -4  -6 -10 32.4859 6.70297   3
  -4   6 -10 24.8241 10.5700   2
  -4   6 -11 45.8756 12.0070   2
  -4  -6 -11 44.7578 8.15131   3
  -4  -6 -12 156.871 15.2087   3
  -4   6 -12 44.6374 29.6551   5
  -4   6 -13 5.71111 20.8116   5
  -4  -6 -13 3.35450 6.16657   3
  -4   6 -14 11.4254 23.7573   5
  -4  -6 -14 114.869 24.6311   1
  -4   6 -15-5.65418 22.0345   5
  -4  -6 -15 78.9403 22.7019   1
  -4   6 -16 5.56691 22.2239   5
   4  -7 -16 27.6647 12.7261   3
   4  -7 -15 9.91740 9.73262   3
   4  -7 -14 3.14444 9.81837   3
   4  -7 -14 7.89170 9.75033   7
   4  -7 -13 361.164 32.1465   7
   4  -7 -13 340.679 32.0455   3
   4  -7 -12 10.4778 8.37272   7
   4  -7 -12 5.55039 7.84933   3
  -4   7  11 787.227 58.9512   2
   4  -7 -11 760.348 58.8391   7
  -4   7  10 67.8677 12.4745   2
   4  -7 -10 68.7106 12.4643   7
  -4   7   9 710.219 60.1312   8
   4  -7  -9 936.523 62.6705   7
  -4   7   9 837.301 62.5130   2
  -4   7   8 39.2662 9.69172   2
  -4   7   8 37.9343 10.6026   8
  -4  -7   8 9.48172 9.50502   4
  -4   7   8 37.9347 9.11920   4
   4  -7  -8 37.4762 8.34439   3
  -4  -7   7 47.7439 11.8272   4
  -4   7   7 48.3365 9.73617   4
   4  -7  -7 59.9121 9.42166   3
  -4   7   7 68.2095 12.7284   2
   4  -7  -6 116.997 12.5864   3
  -4   7   6 90.4083 15.5210   2
  -4   7   6 89.1693 11.9004   4
  -4  -7   6 100.075 14.0565   4
  -4  -7   5 24.9587 7.30775   4
  -4   7   5 26.3157 6.34649   4
  -4   7   5 5.76308 8.97406   2
   4  -7  -5 25.3501 6.08762   3
  -4  -7   4 157.691 16.0216   4
  -4   7   4 140.051 14.4832   4
   4  -7  -4 152.884 14.6855   3
  -4   7   4 149.751 20.6136   2
   4  -7  -4 154.439 14.5241   6
  -4   7   4 156.265 17.3387   5
   4  -7  -3 337.182 26.2308   3
   4  -7  -3 354.976 26.4129   6
  -4   7   3 347.274 30.0149   5
   4  -7  -2 58.0501 8.15977   3
   4  -7  -2 81.1455 9.51087   6
   4   7  -2 60.7358 9.04577   6
  -4   7   2 69.1295 11.9129   5
  -4  -7   1 1363.03 92.0003   1
   4  -7  -1 1379.15 90.2583   3
  -4   7   1 1176.60 100.646   2
  -4   7   1 1269.58 96.8498   5
  -4  -7   0 0.89213 4.97285   7
   4  -7   0 4.91662 3.57096   3
  -4   7   0 7.21891 6.58159   5
  -4  -7   0 1.04323 5.47136   1
  -4   7   0 6.01764 4.88010   3
  -4   7   0 7.36871 9.24754   2
   4   7   0 3.71077 4.40120   4
   4  -7   0 5.25315 4.37667   4
   4  -7   1 1437.85 100.170   3
  -4   7  -1 1382.19 112.547   2
   4   7   1 1454.87 100.837   4
   4  -7   1 1480.60 100.997   4
  -4  -7  -1 1573.87 102.447   7
  -4  -7  -1 1511.23 105.461   1
  -4   7  -1 1612.27 100.841   3
  -4  -7  -2 9.79652 4.62571   7
  -4   7  -2 2.42210 4.10999   6
  -4  -7  -2 4.64233 4.50507   6
   4  -7   2 7.42180 4.76707   4
  -4  -7  -2 1.43022 6.73983   1
   4   7   2 2.61634 3.96056   4
  -4   7  -2 13.1114 9.56348   2
  -4   7  -2 9.50664 4.20308   3
   4  -7   2 8.30302 3.66907   3
  -4  -7  -3 1041.50 66.0542   7
  -4   7  -3 986.628 79.0303   5
  -4  -7  -3 823.089 71.1535   1
  -4   7  -3 1027.02 80.1203   2
  -4  -7  -3 895.636 67.3497   6
  -4   7  -3 925.480 67.9777   6
   4  -7   3 965.718 64.9826   3
  -4   7  -4 34.0146 15.1169   5
  -4  -7  -4 72.1782 10.2658   6
  -4   7  -4 51.9286 14.8961   2
  -4  -7  -4 68.0237 7.53500   7
  -4   7  -5 283.211 34.1028   2
  -4   7  -5 233.767 34.2697   5
   4   7   5 277.431 20.4563   5
  -4  -7  -5 293.426 20.8080   7
  -4   7  -6 123.334 25.2565   5
  -4   7  -6 77.6839 17.9329   2
  -4   7  -7 35.7607 18.8206   5
  -4  -7  -7 57.6546 8.21124   3
  -4   7  -7 85.3746 19.0528   2
  -4   7  -8 4.81644 16.9655   5
  -4   7  -8 31.9293 13.2596   2
  -4   7  -8 6.49459 2.54417   3
  -4  -7  -8 21.1199 6.14151   3
  -4   7  -9 303.616 33.8155   2
  -4  -7  -9 286.231 23.4851   3
  -4   7 -10 66.3754 16.0474   2
  -4  -7 -10 59.7124 9.57708   3
  -4  -7 -11 310.027 24.6525   3
  -4   7 -11 357.223 33.6187   2
  -4  -7 -12-3.69052 6.94979   3
  -4   7 -12-11.8434 23.6388   5
  -4  -7 -13 319.612 24.3086   3
  -4   7 -13 18.0990 37.2923   5
  -4   7 -14 18.3343 25.0908   5
  -4   7 -15 18.0888 29.9871   5
  -4  -7 -15 156.262 30.6938   1
  -4   7 -16-5.81783 23.2256   5
   4  -8 -15 193.661 23.5006   3
   4  -8 -14 2.62498 9.56596   7
   4  -8 -14 1.60826 9.80703   3
   4  -8 -13 190.745 20.1132   7
   4  -8 -13 111.438 18.2790   3
   4  -8 -12 22.9799 10.0488   7
  -4   8  12 29.6688 10.1500   2
   4  -8 -12 18.7654 9.62763   3
  -4   8  11 137.643 19.3340   2
   4  -8 -11 212.338 21.1868   7
   4  -8 -10 56.4805 12.2711   7
  -4   8  10 54.8048 11.8695   2
   4  -8  -9 47.1542 10.6018   3
  -4   8   9 33.5850 10.0745   2
  -4   8   9 23.7186 8.84538   4
  -4  -8   9 24.6019 11.2661   4
   4  -8  -8 13.1105 7.63553   3
  -4  -8   8 3.61440 7.98683   4
  -4   8   8 7.39501 5.81417   4
  -4   8   8 1.82529 8.93390   2
   4  -8  -7 522.247 40.0756   3
  -4   8   7 525.103 45.7019   2
  -4  -8   7 524.046 43.0871   4
  -4   8   7 488.769 39.8929   4
   4  -8  -6 5.57032 5.59823   3
  -4   8   6 4.69120 5.22804   4
  -4  -8   6 1.28409 6.28233   4
  -4   8   6 2.08665 8.78311   2
  -4   8   5 993.247 75.4617   2
   4  -8  -5 941.283 66.6532   3
  -4   8   5 990.647 69.4964   5
  -4  -8   5 920.645 67.6403   4
  -4   8   5 815.530 65.5720   4
   4   8  -5 1093.89 68.5903   6
   4  -8  -5 929.928 65.4678   6
   4  -8  -4 12.5160 4.41393   6
   4  -8  -4 4.91323 5.01531   3
  -4   8   4 8.23381 6.47288   5
  -4  -8   4 5.59853 4.91072   4
  -4   8   4 11.6851 10.0870   2
  -4   8   4 3.88350 4.64584   4
   4  -8  -3 1258.38 86.3443   6
  -4   8   3 1286.52 97.4870   2
   4  -8  -3 1230.41 86.8174   3
  -4   8   3 1332.88 92.1381   5
  -4   8   2 15.2314 8.31435   5
   4  -8  -2 11.9625 4.79895   3
  -4  -8   1 313.452 26.6034   1
  -4   8   1 325.324 36.4590   2
   4  -8  -1 326.959 25.4724   3
  -4   8   1 332.815 32.5479   5
  -4   8   0 125.616 18.5188   5
   4   8   0 130.060 12.7288   4
  -4  -8   0 156.367 15.8961   1
  -4   8   0 164.499 23.6754   2
   4  -8   0 118.325 12.4024   3
  -4   8  -1 173.521 23.6093   5
   4  -8   1 185.357 16.1927   4
   4   8   1 198.842 16.3757   4
  -4   8  -1 210.872 28.0673   2
  -4  -8  -1 177.980 20.3195   1
   4  -8   1 176.811 16.0702   3
  -4  -8  -1 194.485 18.5167   7
   4  -8   2 41.3504 6.44454   3
  -4  -8  -2 47.8159 8.37689   7
  -4  -8  -2 62.7250 12.0750   1
   4   8   2 40.9969 7.06118   4
   4  -8   2 31.6298 6.45062   4
  -4   8  -2 39.6028 6.82967   6
  -4  -8  -2 51.2278 7.33205   6
  -4   8  -2 65.7810 16.1507   2
  -4   8  -3 207.526 19.3332   6
  -4  -8  -3 212.308 18.9368   6
   4  -8   3 208.617 17.4803   3
  -4  -8  -3 218.267 18.4896   7
  -4   8  -3 189.083 28.1551   2
  -4  -8  -4 54.2212 8.98541   6
  -4   8  -4 57.1565 9.92360   6
  -4   8  -4 54.6242 7.60995   3
  -4   8  -4 58.7417 18.7097   5
  -4  -8  -4 50.4255 7.57209   7
  -4   8  -4 46.5304 15.8224   2
  -4  -8  -5 441.729 32.6523   7
  -4   8  -5 440.593 47.3778   2
  -4   8  -5 516.649 33.5787   3
   4   8   5 455.642 31.8500   5
  -4   8  -6 17.3297 16.9617   5
  -4   8  -6 40.7649 15.5002   2
  -4   8  -6 32.7587 5.94790   3
  -4  -8  -6 38.3213 5.05465   7
  -4   8  -7 777.719 65.7568   2
  -4   8  -7 683.638 47.7106   3
  -4   8  -7 609.160 69.4732   5
  -4   8  -8 2.86413 3.97508   3
  -4   8  -8 5.18719 18.9031   5
  -4  -8  -8 10.7786 5.98129   3
  -4   8  -8-9.14390 12.8271   2
  -4   8  -9 708.123 56.8453   2
  -4  -8  -9 596.183 41.8659   3
  -4   8 -10 22.0605 13.3355   2
  -4   8 -10 23.1589 24.4186   5
  -4  -8 -10 27.8445 8.00213   3
  -4   8 -11 131.681 22.3609   2
  -4  -8 -11 115.461 14.0884   3
  -4  -8 -12 40.6781 9.81954   3
  -4   8 -12-18.7246 22.8094   5
  -4  -8 -13-3.24014 8.00427   3
  -4   8 -13-6.32817 24.5490   5
  -4   8 -14 12.7684 22.4892   5
  -4   8 -15 6.27401 22.8650   5
   4  -9 -14-1.63486 9.60621   3
   4  -9 -13 183.181 22.5186   3
   4  -9 -13 214.404 22.7540   7
  -4  -9  12 5.05997 12.3849   4
   4  -9 -12 11.7196 8.63099   3
  -4   9  12 10.8125 9.76962   2
   4  -9 -12 9.73921 9.36992   7
  -4   9  11 277.977 27.4812   2
   4  -9 -11 308.050 27.7406   7
   4  -9 -10 13.1188 9.20392   7
  -4  -9  10 2.15291 10.3320   4
  -4   9  10 4.40615 8.29562   4
  -4   9  10-1.75595 8.90098   2
   4  -9  -9 494.917 39.6370   3
  -4   9   9 438.835 38.9558   4
  -4  -9   9 440.828 42.5334   4
  -4  -9   8-6.58766 8.62995   4
  -4   9   8 9.16826 5.90984   4
  -4   9   8 2.08506 10.1957   2
   4  -9  -8 5.76602 6.95075   3
   4  -9  -7 116.236 14.5827   3
  -4   9   7 97.8449 18.2653   2
  -4   9   7 134.764 14.5059   4
  -4  -9   7 133.454 16.9579   4
  -4   9   6 16.6272 6.02080   4
  -4  -9   6 10.6288 6.74122   4
  -4   9   6 14.1870 10.2433   2
   4  -9  -6 20.2707 7.26838   3
  -4   9   5 35.2474 13.3398   2
   4  -9  -5 57.3285 8.14749   6
   4   9  -5 53.9073 9.26873   6
   4  -9  -5 48.8111 8.99879   3
  -4   9   5 43.4769 7.93656   4
  -4  -9   5 37.6627 8.48488   4
  -4   9   5 58.3692 11.3442   5
   4  -9  -4 1.38116 4.64306   6
   4  -9  -4 0.90459 5.10923   3
  -4   9   4 10.5369 12.3930   2
  -4   9   4 7.49363 8.10193   5
   4  -9  -3 185.408 17.2082   3
  -4   9   3 163.992 25.8405   2
  -4   9   3 178.594 21.0374   5
   4  -9  -2-0.77320 4.48444   3
  -4   9   2 3.78717 8.16414   5
  -4   9   1 695.052 64.4708   2
  -4  -9   1 706.467 50.9469   1
   4  -9  -1 661.693 49.4633   3
  -4   9   1 739.077 58.3910   5
   4  -9   0 4.95754 4.42195   3
  -4   9   0-2.24323 9.20049   5
  -4   9   0-3.14498 11.0720   2
  -4  -9   0 2.32948 6.48444   1
   4  -9   1 971.506 73.8544   4
   4   9   1 1058.29 73.8646   4
  -4  -9  -1 1284.10 81.0156   1
  -4   9  -1 1101.15 91.5124   2
  -4   9  -1 1064.18 86.0486   5
   4  -9   1 1176.05 75.0413   3
   4  -9   2 2.69982 4.62663   3
  -4   9  -2 8.74569 11.3101   5
  -4  -9  -2 1.57000 8.22621   1
   4  -9   2 0.60488 4.37506   4
   4   9   2 5.84436 4.15535   4
  -4   9  -2-3.30991 12.0622   2
   4   9   3 1013.87 71.5977   4
   4  -9   3 990.593 71.3650   4
  -4   9  -3 1028.88 88.3920   2
  -4  -9  -3 1110.11 72.3778   6
  -4   9  -3 1022.42 72.4408   6
  -4  -9  -3 1079.27 72.9623   7
  -4  -9  -4 18.0938 5.97662   6
  -4   9  -4 10.7682 5.68140   6
  -4  -9  -4 15.0095 5.70489   7
  -4   9  -4 17.1082 12.9114   2
  -4   9  -5 199.197 20.9245   6
  -4  -9  -5 208.925 19.9148   6
  -4   9  -5 203.553 30.7875   2
  -4  -9  -5 210.882 17.3140   7
  -4   9  -5 126.397 30.1116   5
  -4   9  -6 6.93473 11.7755   2
  -4   9  -6 13.8230 16.2300   5
  -4  -9  -6 8.61832 3.93980   7
  -4   9  -7 20.4719 18.7516   5
  -4   9  -7 37.9106 16.3305   2
  -4   9  -8 10.9195 19.8944   5
  -4   9  -8 3.37018 13.8212   2
  -4  -9  -8-1.01152 6.66178   3
  -4  -9  -9 196.667 18.2119   3
  -4   9  -9 173.522 28.9200   2
  -4  -9 -10 1.07890 7.45923   3
  -4   9 -10 3.08690 13.3090   2
  -4   9 -10-12.2593 21.5782   5
  -4  -9 -11 293.110 24.2136   3
  -4   9 -11 247.893 33.2507   2
  -4  -9 -12-1.15563 8.20944   3
  -4   9 -12-6.43397 23.4446   5
  -4  -9 -13 243.647 20.6846   3
  -4   9 -13-12.9913 25.2400   5
  -4   9 -14 13.0384 27.4426   5
  -4 -10  15 235.462 33.3453   4
  -4 -10  14 15.7465 15.2546   4
  -4  10  13 56.2782 15.1633   4
  -4 -10  13 35.1545 15.5147   4
   4 -10 -13 60.4571 13.3156   3
  -4  10  13 58.5151 14.5301   2
   4 -10 -12-3.10363 9.57623   3
  -4 -10  12 2.36757 11.5764   4
  -4  10  12-6.79072 10.5970   4
   4 -10 -12-4.25699 10.1696   7
  -4  10  12-1.70513 9.35669   2
  -4 -10  11 2.18813 10.3018   4
  -4  10  11 6.10579 8.62693   4
   4 -10 -11 16.2552 10.1302   7
  -4  10  11 1.81934 9.69185   2
  -4  10  10 1.97975 10.0305   2
  -4 -10  10-7.84773 10.7631   4
  -4  10  10 5.45159 8.60169   4
   4 -10  -9 36.5084 10.9567   3
  -4  10   9 47.9146 14.8262   2
  -4 -10   9 20.6261 10.7479   4
  -4  10   9 47.9305 10.6038   4
   4 -10  -8 17.2228 8.97750   3
  -4 -10   8 14.7777 8.20257   4
  -4  10   8 25.1526 7.61238   4
  -4  10   8 18.6451 12.0749   2
   4 -10  -7 394.835 31.7860   3
  -4  10   7 342.211 37.5792   2
  -4 -10   7 384.266 32.0502   4
  -4  10   7 327.025 28.7290   4
   4 -10  -6 57.3159 10.9474   3
  -4  10   6 36.7295 8.65558   4
  -4 -10   6 51.0108 9.93895   4
  -4  10   5 669.116 61.9896   2
  -4  10   5 732.254 54.9750   5
   4  10  -5 686.356 50.9934   6
   4 -10  -5 673.865 51.3431   3
  -4  10   4 32.4877 9.91531   5
  -4  10   4 23.7544 13.4927   2
   4 -10  -4 20.8795 7.42793   3
  -4  10   3 849.947 74.6023   2
  -4  10   3 893.082 67.4781   5
   4 -10  -3 838.032 61.3048   3
  -4 -10   2 23.7447 6.85974   1
   4 -10  -2 21.0541 6.63502   3
  -4 -10   1 192.745 18.1113   1
   4 -10  -1 183.687 17.0653   3
  -4  10   1 159.307 28.1129   2
  -4  10   1 140.571 22.1086   5
  -4  10   0 12.2732 12.0302   5
   4 -10   0 17.3047 5.93531   3
  -4  10   0 3.48842 12.7397   2
  -4 -10   0 9.68005 8.33144   1
  -4  10  -1 8.35580 11.1733   5
  -4  10  -1 21.3725 14.2620   2
   4 -10   1 18.6474 6.17331   3
  -4 -10  -1 18.5336 9.35926   1
  -4  10  -2 41.3865 15.4337   5
  -4  10  -2 36.2890 16.1677   2
  -4 -10  -2 49.2524 13.4720   1
   4 -10   2 36.6620 7.31339   3
   4 -10   2 29.1233 6.16271   4
  -4  10  -3 206.005 30.8412   5
   4 -10   3 214.561 18.1923   4
  -4  10  -3 228.482 33.0671   2
  -4 -10  -4 16.8327 5.71012   6
  -4  10  -4 20.3047 5.97722   6
  -4 -10  -4 18.5228 6.74070   7
  -4  10  -4 33.5180 16.8490   2
  -4  10  -5 321.877 42.7411   2
  -4 -10  -5 307.946 27.5485   6
  -4  10  -5 315.215 28.7702   6
  -4  10  -6 3.75036 14.1200   2
  -4 -10  -6 7.51603 7.36605   6
  -4  10  -6 10.3786 7.73074   6
  -4  10  -6-4.86763 17.1405   5
  -4  10  -7 364.117 54.8535   5
  -4  10  -7 441.023 49.0972   2
  -4  10  -8 36.6402 17.6069   2
  -4  10  -8-5.71393 17.8587   5
  -4  10  -9 184.785 29.6142   2
  -4  10  -9 72.4585 31.2387   5
  -4  10 -10 40.8180 17.9074   2
  -4  10 -10 18.7376 22.8288   5
  -4 -10 -10 25.3195 10.1126   3
  -4  10 -11 63.2788 20.6475   2
  -4  10 -11 12.8762 24.4312   5
  -4 -10 -11 52.3353 12.1930   3
  -4  10 -12 6.60302 24.8542   5
  -4 -10 -12 7.72227 9.31390   3
  -4  10 -13-19.8911 24.9567   5
  -4 -10 -13 13.2574 9.34549   3
  -4 -11  12 12.7855 12.1141   4
   4 -11 -12 44.4329 13.0330   3
  -4  11  12 12.9625 11.9029   2
  -4 -11  11 154.668 23.2919   4
  -4  11  11 228.607 26.1730   2
   4 -11 -11 225.244 23.8871   7
  -4  11  10-4.41452 13.1342   2
  -4 -11  10 1.73303 10.0513   4
  -4  11   9 347.369 35.7882   2
  -4 -11   9 259.906 28.1474   4
   4 -11  -9 313.232 29.1471   3
  -4 -11   8 10.4342 8.46594   4
   4 -11  -8 24.2252 9.64333   3
  -4  11   8 7.82198 12.7817   2
  -4 -11   7 61.7751 12.1780   4
   4 -11  -7 94.4031 13.4928   3
  -4  11   7 103.114 20.6234   2
   4 -11  -6 35.3032 9.45020   3
  -4  11   6 20.8457 13.0078   2
  -4  11   6 35.7755 9.93050   5
   4 -11  -5 5.37476 6.80093   3
  -4  11   5 15.6079 12.1184   2
  -4  11   5 6.37912 8.76177   5
   4 -11  -4 14.1805 7.23524   3
  -4  11   4 19.2788 10.5000   5
  -4  11   3 205.980 23.3616   5
   4 -11  -3 134.954 15.9554   3
  -4  11   3 176.161 28.9929   2
   4 -11  -2 41.3894 9.56923   3
  -4 -11   2 50.4616 8.26890   1
  -4  11   2 66.0031 14.8671   5
  -4  11   1 401.794 39.4173   5
   4 -11  -1 385.090 29.8443   3
  -4 -11   1 323.253 29.3399   1
  -4 -11   0 22.4366 8.82090   1
  -4  11   0 18.4710 12.2509   5
  -4  11   0 26.6966 16.8942   2
   4 -11   0 23.8601 7.01234   3
  -4 -11  -1 509.383 43.6195   1
  -4  11  -1 517.174 57.1555   2
  -4  11  -1 508.828 51.4859   5
   4 -11   1 545.474 40.2355   3
  -4  11  -2 17.0676 14.0197   5
  -4 -11  -2-1.70836 9.53945   1
  -4  11  -2 15.7848 14.8705   2
   4 -11   2 16.5136 6.68689   3
  -4  11  -3 483.165 52.3341   2
  -4  11  -3 367.656 46.9937   5
  -4  11  -4 36.1866 17.4313   2
  -4  11  -4 31.0730 6.74883   6
  -4  11  -4 4.22076 16.4747   5
   4  11   5 133.262 15.8291   5
  -4  11  -5 109.298 13.1396   6
  -4  11  -5 136.948 28.1431   2
  -4  11  -6 28.1388 16.9680   2
  -4  11  -6 19.7456 7.49460   6
  -4  11  -7 19.9322 17.9916   2
  -4  11  -7 10.7984 8.52847   6
  -4  11  -7-16.5651 19.4421   5
  -4  11  -8 39.1987 19.9351   2
  -4  11  -8 11.6579 22.0042   5
  -4  11  -9 30.3572 18.6140   2
  -4  11  -9 12.2647 24.5259   5
  -4  11 -10 14.5865 16.1167   2
  -4  11 -10 12.6272 19.7209   5
  -4  11 -11 25.9015 27.2964   5
  -4  11 -12-13.2183 23.2816   5
  -4  12  12 20.0649 13.4110   2
   4 -12 -11 4.78470 11.5314   7
  -4  12  11 6.62224 13.3029   2
  -4  12  10 44.0955 15.5501   2
   4 -12  -9 21.2423 10.6094   3
  -4  12   9 32.0680 15.9797   2
   4 -12  -8 104.930 15.5921   3
  -4  12   8 77.7582 21.0204   2
   4 -12  -7 131.894 16.6274   3
  -4  12   7 98.1172 23.6813   2
   4 -12  -6 46.7426 11.0479   3
  -4  12   6 32.7300 15.9424   2
  -4  12   6 43.6723 11.2276   5
  -4  12   5 312.081 38.3829   2
  -4  12   5 266.645 28.1073   5
   4 -12  -5 273.414 25.7130   3
   4 -12  -4-1.08929 7.46297   3
  -4  12   4 3.63102 14.8918   2
  -4  12   4 11.3236 9.72693   5
  -4  12   3 298.278 41.1861   2
  -4  12   3 357.595 35.1807   5
   4 -12  -3 331.315 28.8159   3
  -4  12   2 17.1087 13.0274   5
   4 -12  -2 9.19239 7.22619   3
  -4  12   1 74.4193 18.0670   5
   4 -12  -1 73.5624 11.3740   3
  -4 -12   1 63.5646 11.4049   1
  -4  12   0 79.0617 19.5661   5
  -4 -12   0 49.4728 11.5173   1
   4 -12   0 68.9325 11.0195   3
  -4  12   0 58.0742 20.6662   2
  -4  12  -1 19.1926 15.5105   5
  -4 -12  -1 42.5727 12.9132   1
   4 -12   1 36.8228 8.84503   3
  -4  12  -1 33.6614 18.2810   2
  -4  12  -2 123.402 28.3452   2
  -4 -12  -2 137.514 19.9768   1
  -4  12  -2 107.790 26.1388   5
  -4  12  -3 51.7086 20.2266   5
  -4  12  -3 12.8676 15.1979   2
   4  12   4 146.861 24.0165   5
  -4  12  -4 105.715 28.5247   5
  -4  12  -4 146.244 29.6247   2
  -4  12  -5 43.2463 24.5241   5
  -4  12  -5 141.623 29.0572   2
  -4  12  -6 12.8063 17.5257   2
  -4  12  -7 295.938 42.4640   2
  -4  12  -8-5.93509 21.6362   5
  -4  12  -8-12.4095 16.9761   2
  -4  12  -9 31.0817 27.3225   5
  -4  12  -9 140.543 29.0130   2
  -4  12 -10-12.7385 23.9816   5
  -4  12 -10 38.3187 21.6442   2
  -4  12 -11 6.50166 22.8915   5
  -4  13  11 62.4612 17.5323   2
  -4  13  10 8.04949 14.0575   2
   4 -13 -10 1.54100 10.4578   3
  -4  13   9 154.063 28.5375   2
   4 -13  -9 193.225 22.3568   3
  -4  13   8-3.14473 17.2546   2
   4 -13  -8 8.39863 9.03372   3
  -4  13   7 46.9862 17.1407   2
   4 -13  -7 27.9621 11.1327   3
  -4  13   6 103.992 17.0638   5
  -4  13   6 121.044 27.2548   2
   4 -13  -6 104.807 15.6474   3
  -4  13   5-1.79319 8.76694   5
   4 -13  -5-3.71918 8.08147   3
  -4  13   5 7.46443 15.3061   2
   4 -13  -4 164.946 19.4152   3
  -4  13   4 212.578 24.9166   5
  -4  13   4 185.512 32.3549   2
   4 -13  -3 66.3225 11.9211   3
  -4  13   3 49.1898 20.7667   2
  -4  13   3 54.1745 14.9085   5
  -4  13   2 77.4985 17.8055   5
   4 -13  -2 70.2199 11.7580   3
  -4  13   1 122.600 22.9998   5
   4 -13  -1 121.116 15.1222   3
   4 -13   0-1.07745 6.33080   3
  -4  13   0 4.46170 17.3077   2
  -4  13   0-3.03121 13.3765   5
  -4  13  -1 167.283 35.0265   2
  -4 -13  -1 184.727 21.6985   1
  -4  13  -1 134.254 27.9511   5
   4 -13   1 178.035 18.5221   3
  -4  13  -2 13.6657 16.6035   2
  -4 -13  -2 1.79738 11.2243   1
  -4  13  -2 7.50546 16.1848   5
  -4  13  -3 155.299 33.4613   2
  -4  13  -3 124.398 31.7557   5
  -4  13  -4 18.2494 16.0849   2
  -4  13  -4 9.12515 16.0857   5
  -4  13  -5 63.6164 23.5125   2
  -4  13  -5 9.91923 20.4503   5
  -4  13  -6 67.5420 23.6146   2
  -4  13  -6 68.8631 28.0929   5
  -4  13  -7 8.86943 17.7109   2
  -4  13  -8 90.9580 25.7948   2
  -4  13  -9 25.1493 20.5774   2
  -4  13  -9 36.9359 28.4360   5
  -4  13 -10 63.8611 24.3943   2
  -4  14  11-10.3312 15.7621   2
  -4  14  10 31.8313 16.4635   2
  -4  14   9 18.8558 16.2400   2
   4 -14  -8 56.0615 13.0022   3
  -4  14   8 40.6478 20.1786   2
   4 -14  -7 78.6973 15.4375   3
  -4  14   7 90.5759 22.7177   2
   4 -14  -6 27.5668 10.3213   3
  -4  14   6 19.2315 19.2513   2
  -4  14   6 40.9139 12.7589   5
   4 -14  -5 30.3069 10.8538   3
  -4  14   5 24.1792 19.4771   2
  -4  14   5 54.2243 14.0527   5
   4 -14  -4 1.26316 8.81751   3
  -4  14   4 4.26050 16.0359   2
  -4  14   4 8.34628 10.9334   5
   4 -14  -3 105.733 15.9298   3
  -4  14   3 88.3489 26.4943   2
  -4  14   3 111.513 19.3505   5
   4 -14  -2 25.6580 9.87465   3
  -4  14   2 9.09292 20.1220   2
  -4  14   2 32.5354 14.9534   5
  -4  14   1 51.3227 18.1419   5
   4 -14  -1 35.7863 10.1069   3
  -4  14   0 119.160 31.0687   2
  -4  14   0 164.824 28.5034   5
   4 -14   0 162.776 18.5529   3
  -4  14  -1-3.49421 17.3958   5
  -4  14  -1 4.81270 18.1119   2
  -4  14  -2 97.3698 26.8922   5
  -4  14  -2 130.256 30.2831   2
  -4 -14  -3 35.8301 15.8130   1
  -4  14  -3 14.4872 18.2374   2
  -4  14  -3 17.1888 19.4492   5
  -4  14  -4 41.8809 20.8809   5
  -4  14  -4 86.5411 26.6457   2
  -4  14  -5 10.0426 22.1937   5
  -4  14  -5 28.5641 21.9781   2
  -4  14  -6-10.8173 19.7254   5
  -4  14  -6-14.1247 21.7165   2
  -4  14  -7 50.7977 26.5610   5
  -4  14  -7 124.747 29.9652   2
  -4  14  -8 17.9052 17.9049   2
  -4  14  -9 77.7393 25.2185   2
  -4  14 -10 32.9688 20.6263   2
  -4  15   8 3.62114 18.6618   2
  -4  15   7 27.1491 20.7157   2
  -4  15   6 160.709 31.6082   2
   4 -15  -6 100.473 16.6814   3
  -4  15   5-1.91336 11.2427   5
  -4  15   5-4.31979 17.2435   2
   4 -15  -5-1.40171 9.60169   3
  -4  15   4 141.221 22.3221   5
  -4  15   4 145.024 32.4855   2
   4 -15  -4 96.2803 16.5755   3
  -4  15   3 31.9636 13.1591   5
  -4  15   3 9.40599 18.2963   2
   4 -15  -3 18.9056 10.4143   3
  -4  15   2 95.0915 22.0998   5
   4 -15  -2 103.570 16.1650   3
  -4  15   2 130.361 32.8175   2
   4 -15  -1 54.6172 12.9453   3
  -4  15   1 76.3939 22.1412   5
  -4  15   0 30.6970 17.1443   5
  -4  15   0 50.3090 25.5989   2
  -4  15  -1 28.8736 18.6577   5
  -4  15  -1 15.2367 21.4210   2
  -4  15  -2-3.97411 18.6980   5
  -4  15  -2 20.3349 20.8511   2
  -4  15  -3 4.35338 17.8737   5
  -4  15  -3 25.2952 20.7648   2
  -4  15  -4 4.76804 18.4960   5
  -4  15  -4-5.01752 20.5769   2
  -4 -15  -5 30.1104 16.9277   1
  -4  15  -5 15.1989 17.8726   5
  -4  15  -5 4.96090 19.8361   2
  -4  15  -6 151.224 35.1052   2
  -4  15  -7-4.75749 20.5140   2
  -4  16   4 8.90669 12.0481   5
  -4  16   3 5.03630 13.1949   5
   4 -16  -2 49.6004 13.5649   3
  -4  16   2 34.0802 17.7486   5
  -4  16   1 13.0574 15.9807   5
  -4  16   0 78.0925 24.6024   5
  -4  16  -1 7.55129 17.0430   5
  -4  16  -2 48.1562 25.2358   5
  -4  16  -3-8.78814 23.3928   5
  -4  17   2 31.4670 17.5596   5
  -4  17   1-3.24929 16.7455   5
  -4  17   0-7.31500 17.8867   5
   5   0 -17 12.9148 12.1792   3
   5   0 -16 274.501 29.1715   3
   5   0 -15 8.88613 10.1869   3
   5   0 -14 276.564 29.1131   3
   5   0 -13 1.73052 8.91837   3
   5   0 -12 316.604 31.1859   3
   5   0 -11-1.50910 7.77724   7
   5   0 -10 11.4732 7.42729   7
   5   0  -9 2.39444 4.98472   8
   5   0  -9 3.93880 6.53913   7
   5   0  -8 183.584 17.6201   8
   5   0  -8 161.176 18.3481   7
  -5   0   7-1.66989 7.02658   4
   5   0  -7-1.18021 5.32577   7
   5   0  -7-0.94694 4.36526   8
  -5   0   6 3394.29 228.975   4
  -5   0   5 1.29302 4.87116   4
   5   0  -5 6.23231 5.53271   2
   5   0  -4 1904.47 131.859   2
  -5   0   4 1966.46 132.670   4
  -5   0   3 1.05272 3.96233   4
  -5   0   2 1376.28 95.6517   4
   5   0  -1-2.49989 3.84414   7
  -5   0   0 831.693 59.8593   6
  -5   0  -1-1.00811 3.28623   6
  -5   0  -2 17.4525 4.93659   5
  -5   0  -2 10.1289 4.81682   6
   5   0   3 0.79521 2.80034   2
  -5   0  -3 1.81208 3.51546   5
  -5   0  -4 919.395 66.4008   5
   5   0   4 936.113 65.4629   2
   5   0   5-1.66288 4.69619   2
  -5   0  -5-3.09244 4.34010   5
  -5   0  -6 2573.24 179.949   5
   5   0   6 2756.19 178.447   2
  -5   0  -7-1.88964 9.40744   1
   5   0   7-0.86026 4.85618   2
  -5   0  -7 2.45230 5.65149   5
   5   0   8 1065.60 70.8546   2
  -5   0  -8 996.980 73.5222   5
  -5   0  -8 876.681 76.4384   1
  -5   0  -9-2.10016 9.47635   1
  -5   0  -9 2.95611 6.95339   5
   5   0   9 1.87149 8.06912   8
  -5   0 -10 852.598 63.9775   5
   5   0  10 893.219 67.0740   8
  -5   0 -10 724.930 66.0579   1
  -5   0 -11 3.36226 8.06511   5
   5   0  11 2.13817 9.43568   8
  -5   0 -11-6.89268 10.5899   1
  -5   0 -12 66.9663 14.4213   5
   5   0  12 84.0100 17.0377   8
  -5   0 -12 64.4321 17.1245   1
   5   0  13-7.15444 10.9925   8
  -5   0 -13 4.93230 11.1281   1
   5   0  14 4.90634 11.5505   8
  -5   0 -14-17.7561 13.2965   1
  -5   0 -15-2.60292 13.1889   1
  -5   0 -16 124.768 24.0025   1
  -5   0 -17 8.09046 13.9069   1
   5   1 -17 1.87754 11.5860   3
   5  -1 -17 5.48519 10.8824   3
   5   1 -16 1.88451 10.9343   3
   5  -1 -16 8.91579 11.8672   3
   5  -1 -15 6.93969 10.7073   3
   5   1 -15 1.89319 10.5414   3
   5  -1 -14 66.8105 14.1509   3
   5   1 -14 62.9229 14.7322   3
   5  -1 -13 12.8666 9.12185   3
   5   1 -13 14.7905 10.3284   3
   5  -1 -12 865.230 62.5963   7
   5  -1 -12 741.254 61.3463   3
   5  -1 -11 21.9678 8.72040   7
   5   1 -10 949.522 71.9513   7
   5  -1 -10 1084.50 72.2083   7
   5   1 -10 927.372 64.8967   8
   5   1  -9 6.87886 4.59604   8
   5   1  -9 1.37189 6.59513   7
   5  -1  -9 9.04063 6.66900   7
   5  -1  -9 9.56544 7.50859   3
   5  -1  -8 902.714 66.0345   8
   5  -1  -8 874.581 66.7084   3
   5  -1  -8 906.798 66.9123   7
   5   1  -8 930.792 67.5070   7
   5  -1  -7 32.8230 8.61875   3
   5  -1  -7 34.9927 8.91284   8
  -5   1   7 37.0551 9.66817   4
   5  -1  -7 49.9981 9.09708   7
  -5   1   6 563.720 46.5148   4
   5  -1  -6 600.385 45.9260   8
  -5   1   5 155.423 17.0021   4
   5  -1  -5 148.231 16.7818   8
   5   1  -5 148.168 15.8399   7
   5  -1  -5 147.611 16.3586   2
   5  -1  -4 0.90737 3.72379   5
  -5   1   4 1.11620 4.06970   4
   5  -1  -4 7.60125 5.21130   2
   5  -1  -4 1.23066 5.55462   8
  -5   1   3 155.284 16.0485   4
  -5   1   2 403.519 33.7835   4
   5   1  -2 454.091 33.5527   7
   5   1  -1 54.0479 7.66690   7
  -5  -1   0 3168.34 205.401   6
   5  -1   0 2947.21 201.856   3
   5   1   0 3229.76 203.960   7
   5   1   1 11.9994 4.32650   7
  -5  -1  -1 8.00726 4.63452   6
   5  -1   1 9.59336 2.80153   3
  -5   1  -1 11.4307 4.92862   5
   5   1   1 0.84280 2.66691   5
  -5   1  -2 1472.57 102.881   5
   5   1   2 1696.34 103.234   5
  -5  -1  -2 1435.28 103.387   6
   5  -1   2 1407.29 97.2764   3
   5   1   2 1662.73 100.986   7
   5  -1   3 25.4293 2.27275   3
  -5  -1  -3 15.1159 5.95966   6
   5   1   3 16.7528 4.68133   7
   5   1   3 28.3638 3.13901   3
  -5   1  -3 27.8713 6.89793   5
   5   1   3 20.6401 6.27953   5
   5   1   4 1962.39 123.177   3
   5   1   4 1830.65 127.206   2
  -5   1  -4 1884.72 130.323   5
  -5  -1  -4 1920.53 127.886   5
   5   1   4 2207.27 132.027   5
   5   1   5 59.5812 8.98580   2
   5  -1   5 71.0487 10.8879   2
  -5   1  -5 68.2412 11.5537   5
  -5  -1  -5 65.5088 9.24131   5
   5   1   5 89.2534 14.9075   5
   5   1   5 87.3883 6.04890   3
  -5  -1  -5 58.0265 12.7675   1
   5  -1   6 472.912 41.0919   8
  -5   1  -6 485.248 39.7103   5
  -5  -1  -6 462.204 35.9335   5
   5  -1   6 518.964 37.4640   2
   5   1   6 428.702 34.5785   2
   5  -1   7 20.4835 9.01091   8
  -5  -1  -7 24.4075 6.41684   5
  -5   1  -7 10.8580 7.53435   5
   5  -1   7 16.1301 7.45938   2
   5   1   7 18.1604 5.75802   2
   5  -1   8 9.90624 9.32109   8
  -5  -1  -8-3.00538 5.16412   5
  -5   1  -8-6.66768 7.18807   5
  -5  -1  -8-4.14863 9.36043   1
   5   1   8-1.44110 4.44742   2
  -5  -1  -9 41.4944 13.2106   1
   5   1   9 42.8325 7.64563   2
  -5   1  -9 19.6082 10.3394   5
  -5  -1  -9 40.7021 8.81762   5
   5  -1   9 33.8666 11.8526   8
  -5   1 -10 392.152 36.2032   5
  -5  -1 -10 426.020 32.4988   5
  -5   1 -10 344.515 36.7361   1
  -5  -1 -10 331.703 37.1623   1
   5  -1  10 354.908 36.9602   8
  -5  -1 -11 16.7201 11.7436   1
  -5   1 -11 8.83840 12.0073   1
  -5   1 -11 22.2468 10.8359   5
  -5  -1 -11 15.4528 7.92737   5
   5   1  11 42.6044 11.8736   8
   5  -1  11 14.2807 12.3285   8
  -5   1 -12 600.220 54.9747   5
  -5  -1 -12 663.819 50.5835   5
  -5   1 -12 680.263 57.7912   1
  -5  -1 -12 640.854 57.7253   1
   5  -1  12 688.439 58.4622   8
   5   1  12 650.134 55.2130   8
  -5  -1 -13-2.57753 13.0593   1
  -5   1 -13-4.72799 11.7691   1
  -5   1 -13 6.69834 10.7115   5
   5  -1  13 2.55949 11.2948   8
   5   1  13 2.18471 10.8765   8
   5   1  14 277.596 30.6557   8
  -5   1 -14 250.792 31.4207   1
  -5  -1 -14 268.864 32.9999   1
   5  -1  14 230.845 30.9370   8
  -5  -1 -15-5.47645 15.2414   1
   5  -1  15 2.39857 12.1528   8
  -5  -1 -16 198.576 30.4190   1
  -5  -1 -17 11.3364 16.2356   1
   5   2 -17 5.92093 11.7723   3
   5  -2 -17 21.2719 13.2705   3
   5  -2 -16 280.897 30.5982   3
   5   2 -16 330.715 33.9074   3
   5   2 -15 22.4028 13.2753   3
   5  -2 -15-6.80453 10.4951   3
   5  -2 -14 148.821 19.7538   3
   5  -2 -13 121.503 17.9508   7
   5  -2 -13 123.148 17.1596   3
   5  -2 -12 255.251 25.5012   7
   5  -2 -12 211.308 23.4263   3
   5  -2 -11 103.241 14.9349   7
   5  -2 -10-2.70880 7.95970   7
   5  -2  -9 93.7120 13.3374   7
   5  -2  -9 73.8964 12.0466   3
   5  -2  -8 213.544 21.5738   8
   5  -2  -8 175.868 19.8905   3
   5  -2  -8 225.438 21.6929   7
   5   2  -8 222.075 22.0148   7
  -5  -2   7 79.7666 13.7143   4
  -5   2   7 77.5017 13.2033   4
   5  -2  -7 56.3802 10.1657   3
   5  -2  -7 79.2507 11.3010   7
   5  -2  -7 74.7969 13.1845   8
   5  -2  -6 1684.18 117.291   8
  -5  -2   6 1701.02 116.784   4
  -5   2   6 1700.51 115.752   4
   5  -2  -6 1675.62 112.925   3
   5   2  -6 1435.07 113.105   7
   5  -2  -6 1714.17 113.959   7
   5  -2  -5 24.3815 5.96279   3
  -5  -2   5 23.0439 7.67608   4
  -5   2   5 16.9547 6.29644   4
   5  -2  -5 14.7189 7.51327   8
   5   2  -5 29.2859 6.68533   7
   5   2  -4 1890.24 127.881   7
  -5   2   4 1891.40 128.441   4
   5  -2  -4 1947.39 132.307   8
   5  -2  -4 1939.29 129.910   2
   5  -2  -4 1733.68 127.394   5
   5  -2  -4 1902.23 126.530   3
  -5  -2   3 92.7042 10.8442   7
   5   2  -3 109.329 11.8013   7
  -5   2   3 86.3527 11.3832   4
   5  -2  -3 61.8464 10.4054   5
   5  -2  -3 112.872 14.8714   8
   5  -2  -3 96.1796 10.2545   3
   5  -2  -3 96.0427 11.3403   6
   5   2  -3 105.626 12.0868   6
   5   2  -2 2400.53 153.422   7
   5   2  -2 2223.61 152.802   4
   5  -2  -2 2176.66 152.876   4
   5  -2  -2 2261.36 157.903   8
   5  -2  -2 2152.80 150.859   3
   5  -2  -2 2365.35 153.366   6
   5   2  -2 2493.90 154.188   6
   5   2  -1 296.104 23.8096   7
   5   2  -1 297.050 23.5352   4
   5  -2  -1 266.304 27.0896   8
  -5   2   1 299.964 25.5201   2
   5  -2  -1 272.843 21.3292   3
   5  -2  -1 266.789 23.8379   6
  -5   2   0 369.588 33.3971   5
   5   2   0 413.619 32.1729   7
   5   2   0 437.458 32.6687   4
   5  -2   0 433.765 37.6329   8
  -5   2   0 470.703 35.1884   2
   5  -2   0 424.951 29.8182   3
  -5   2   0 391.064 32.9544   6
  -5  -2   0 450.518 33.6757   6
  -5   2  -1 81.6222 10.6146   6
  -5  -2  -1 79.4341 10.4516   6
   5   2   1 68.6353 8.94290   5
  -5   2  -1 76.8447 10.4845   5
   5  -2   1 55.3805 10.7418   5
   5   2   1 90.8764 10.3729   4
   5   2   1 73.4455 8.88993   7
   5  -2   1 85.3115 7.18768   3
  -5   2  -1 68.4568 10.3480   2
   5   2   2 155.749 13.5955   7
   5   2   2 163.495 14.9168   5
  -5   2  -2 144.441 15.8893   5
   5  -2   2 163.138 18.6222   5
  -5   2  -2 165.147 16.6543   2
  -5  -2  -2 148.182 15.8430   6
  -5   2  -2 155.241 16.1758   6
   5  -2   2 133.408 10.7641   3
   5   2   2 153.664 16.8313   1
   5  -2   3 229.678 15.2803   3
   5   2   3 217.032 20.0661   5
  -5   2  -3 218.091 21.8905   5
  -5  -2  -3 219.006 21.7724   6
  -5   2  -3 200.885 21.6437   6
  -5   2  -3 218.631 21.1017   2
   5  -2   3 295.036 28.0269   5
   5   2   3 199.769 16.0365   3
   5  -2   3 264.289 22.7440   1
   5   2   3 241.275 18.4159   7
  -5   2  -4 719.924 55.4851   5
   5   2   4 728.569 52.7240   5
  -5   2  -4 733.628 53.6531   2
   5   2   4 691.345 47.4019   3
   5   2   4 731.053 49.5617   7
  -5  -2  -4 653.129 56.0049   1
  -5   2  -5 113.733 15.5571   5
   5   2   5 135.886 15.8925   5
   5  -2   5 129.241 17.9286   8
   5   2   5 79.0926 10.6315   2
   5   2   5 107.146 9.81004   7
  -5  -2  -5 97.3434 16.3806   1
   5   2   5 108.947 8.24589   3
   5   2   6 1781.76 90.7070   3
  -5   2  -6 1538.03 101.373   5
   5   2   6 2718.76 112.621   5
   5  -2   6 1740.54 105.843   8
   5   2   6 1336.85 93.4696   2
   5   2   6 1605.07 91.8563   7
  -5  -2  -6 1444.57 102.590   1
   5  -2   7 2.16379 7.61717   8
   5   2   7-0.21366 2.31835   3
  -5   2  -7-5.40431 8.80675   5
   5   2   7-0.77027 2.39150   7
   5   2   7 1.85259 3.62838   2
   5   2   8 600.802 44.9040   2
  -5   2  -8 633.568 53.4501   5
  -5  -2  -8 678.309 46.2211   5
   5  -2   8 630.508 55.1118   8
  -5  -2  -9 25.2502 6.20298   5
  -5   2  -9 28.4621 12.1486   5
  -5  -2  -9 31.4883 13.3402   1
   5   2   9 29.7978 5.86943   2
   5  -2   9 31.4018 12.5805   8
  -5   2 -10 643.734 59.4978   5
  -5  -2 -10 772.354 51.2225   5
   5  -2  10 698.975 61.5467   8
  -5  -2 -10 607.284 58.7485   1
  -5   2 -11 22.9350 12.7557   5
  -5  -2 -11 19.0771 5.89433   5
   5  -2  11 28.9843 12.7099   8
  -5  -2 -11 17.3112 12.1623   1
  -5   2 -12 51.2115 15.6481   5
   5   2  12 107.394 16.5444   8
   5  -2  12 48.1303 14.9101   8
  -5  -2 -12 79.8248 18.9791   1
   5  -2  13 37.0575 13.6310   8
  -5   2 -13 39.1345 17.4173   5
   5   2  13 72.6108 15.7232   8
  -5  -2 -13 18.7209 11.7858   1
   5  -2  14-7.69245 11.3222   8
  -5   2 -14-8.51631 14.1381   5
   5   2  14-8.54119 11.7208   8
  -5  -2 -14 5.53979 13.7953   1
  -5  -2 -15 8.56654 14.9615   1
   5  -2  15 2.42905 12.3110   8
  -5  -2 -16 105.612 23.9153   1
   5   3 -17 37.5277 15.0539   3
   5  -3 -17 22.2629 13.1861   3
   5   3 -16 10.5989 12.3385   3
   5  -3 -16 23.0427 13.5519   3
   5  -3 -15 101.178 17.2268   3
   5  -3 -14 36.2993 11.1243   3
   5  -3 -14 19.4399 11.3448   7
   5  -3 -13 41.9027 11.6353   3
   5  -3 -13 70.1793 14.1077   7
   5  -3 -12 366.677 36.2776   3
   5  -3 -12 527.688 39.2844   7
   5  -3 -11 43.8252 10.6826   7
   5  -3 -10 866.817 65.2590   7
   5  -3  -9 2.58586 6.20267   7
   5  -3  -9-2.36043 5.66196   3
   5  -3  -8 493.634 41.7767   3
  -5  -3   8 501.206 47.0248   4
   5  -3  -7 81.2784 14.2672   8
   5  -3  -7 59.6626 9.93097   3
   5  -3  -7 90.4346 11.9601   7
  -5  -3   7 94.1201 15.0448   4
  -5   3   7 68.4600 12.0378   4
   5  -3  -6 407.597 31.8971   7
   5   3  -6 398.017 32.0122   7
   5  -3  -6 406.573 36.3712   8
   5  -3  -6 310.624 28.6585   3
  -5  -3   6 367.562 33.0558   4
  -5   3   6 322.256 30.9587   4
   5   3  -5 269.806 23.2786   7
  -5  -3   5 244.706 23.8202   4
  -5   3   5 238.509 22.5644   4
   5  -3  -5 220.062 20.2179   3
   5  -3  -5 224.768 26.5998   8
  -5   3   4 6.07743 5.51268   2
   5  -3  -4 9.98128 4.48420   3
  -5  -3   4 12.0979 5.94058   4
  -5   3   4 5.26918 4.57768   4
   5  -3  -4 8.32224 7.84971   8
   5   3  -4 12.0020 6.09862   7
   5  -3  -3 906.492 64.4628   6
   5   3  -3 1031.65 66.0517   6
   5  -3  -3 955.435 66.8712   5
   5   3  -3 877.626 64.1618   1
  -5  -3   3 869.100 65.8474   4
  -5   3   3 879.822 65.1520   4
   5  -3  -3 926.092 72.1782   8
   5  -3  -3 872.263 62.7605   3
   5   3  -3 876.649 65.2038   7
  -5  -3   3 936.490 64.6046   7
  -5  -3   2 246.816 20.0529   7
   5   3  -2 215.841 20.1079   7
   5   3  -2 247.767 20.8014   1
   5   3  -2 224.211 20.0291   4
   5  -3  -2 190.961 19.5295   4
   5  -3  -2 239.685 26.6034   8
  -5   3   2 221.209 21.9292   2
   5  -3  -2 220.663 18.1521   3
   5   3  -2 234.231 20.9135   6
   5  -3  -2 242.499 20.5574   6
   5  -3  -1 415.068 30.9949   6
  -5   3   1 324.145 30.9692   5
   5   3  -1 358.024 30.2053   1
   5   3  -1 373.072 29.4630   4
  -5  -3   1 382.741 29.0676   7
   5   3  -1 350.064 29.5000   7
  -5   3   1 345.585 31.8510   2
   5  -3  -1 383.834 36.5515   8
   5  -3  -1 419.839 27.9856   3
  -5   3   0 1750.50 129.950   5
   5  -3   0 1976.15 137.160   8
   5   3   0 1949.96 128.070   4
  -5   3   0 1864.70 128.957   6
  -5  -3   0 1956.26 129.234   6
  -5   3   0 1888.35 131.160   2
   5   3   0 1975.14 128.161   7
   5  -3   0 1883.27 125.172   3
   5  -3   1 65.2998 6.20751   3
  -5  -3  -1 60.0880 9.57571   6
  -5   3  -1 69.3360 9.86980   6
   5   3   1 53.0848 8.26807   5
  -5   3  -1 55.4804 10.3460   5
   5   3   1 68.8918 9.25747   4
   5  -3   1 66.9990 9.02116   4
   5   3   1 60.1621 8.05367   7
  -5   3  -1 64.5318 10.4109   2
   5  -3   1 88.6558 12.4320   2
   5   3   2 1512.80 101.163   5
  -5   3  -2 1371.54 104.542   5
   5  -3   2 1839.31 112.403   5
  -5   3  -2 1550.24 105.125   2
   5  -3   2 1494.86 105.313   2
   5   3   2 1422.90 98.4722   3
  -5   3  -2 1499.58 103.807   6
  -5  -3  -2 1430.67 103.236   6
   5   3   2 1525.71 100.434   7
   5  -3   2 1496.54 97.5559   3
  -5   3  -3 70.1224 11.6524   2
   5  -3   3 74.7751 12.5420   2
  -5   3  -3 89.5009 12.5650   6
  -5  -3  -3 70.5510 11.1319   6
   5   3   3 91.5335 10.2492   5
  -5   3  -3 95.8899 13.6788   5
   5   3   3 86.7713 8.93904   7
   5   3   3 81.5935 7.42555   3
   5  -3   3 82.1447 6.52791   3
  -5  -3  -3 88.6573 14.0678   1
  -5  -3  -4 1508.32 111.388   1
  -5   3  -4 1351.60 107.793   2
   5   3   4 1522.01 103.413   7
   5   3   4 1637.43 102.064   3
   5   3   4 1548.02 105.581   5
  -5   3  -4 1514.00 110.855   5
  -5   3  -5 364.508 35.0280   5
   5   3   5 426.391 32.0171   5
   5  -3   5 346.650 37.2340   8
  -5   3  -5 380.563 32.8033   2
   5   3   5 382.061 27.4457   7
   5   3   5 382.618 26.5451   3
  -5  -3  -5 377.973 35.9227   1
   5  -3   6 191.975 25.9838   8
  -5   3  -6 199.481 20.7368   2
  -5   3  -6 208.417 24.3814   5
   5   3   6 207.443 15.4722   3
  -5  -3  -6 171.958 23.4273   1
   5  -3   7 382.838 38.3850   8
  -5   3  -7 415.193 31.4283   2
  -5   3  -7 413.436 37.6128   5
   5   3   7 429.385 25.6202   3
  -5  -3  -7 355.381 35.7391   1
   5  -3   8 13.1701 10.8426   8
   5   3   8 12.0137 3.61956   3
  -5   3  -8 14.5195 10.9589   5
   5   3   8 19.0698 4.66482   2
   5   3   9 124.854 11.6863   2
   5  -3   9 103.255 20.2901   8
   5   3  10 307.547 22.4506   2
   5  -3  10 271.653 33.9478   8
  -5   3 -10 292.570 35.4721   5
   5  -3  11 61.5218 16.6733   8
  -5  -3 -11 75.8597 17.3349   1
  -5   3 -11 83.2522 18.9343   5
  -5   3 -12 328.280 41.1965   5
   5  -3  12 371.029 40.4866   8
  -5  -3 -12 412.087 41.2710   1
   5  -3  13 5.40565 12.2312   8
  -5   3 -13 20.0175 16.3368   5
  -5  -3 -13 22.4892 14.0263   1
   5   3  14 219.625 25.6881   8
  -5  -3 -14 156.776 27.9862   1
   5  -3  14 176.912 26.6323   8
  -5   3 -14 154.251 29.1849   5
   5  -3  15 38.3748 15.4781   8
  -5  -3 -15 32.9223 16.8185   1
  -5  -3 -16 98.1522 24.2820   1
   5   4 -17 19.6375 15.1383   3
   5  -4 -16 129.819 19.0829   3
   5  -4 -15-1.82731 11.1422   3
   5  -4 -15-1.64763 10.5142   7
   5  -4 -14 241.783 25.9759   3
   5  -4 -14 184.360 23.7567   7
   5  -4 -13 44.1714 12.7914   3
   5  -4 -13 48.1980 12.4686   7
   5  -4 -12 200.502 22.5711   3
   5  -4 -12 193.628 21.7539   7
   5  -4 -11 270.276 26.4111   7
   5  -4 -10 23.2479 8.66487   7
   5  -4  -9 1032.72 71.7704   7
   5  -4  -9 907.591 69.9242   3
   5  -4  -8 67.5507 10.7769   3
   5  -4  -8 73.7472 11.9636   7
  -5   4   8 47.7584 11.6342   4
  -5  -4   8 43.1445 12.0411   4
  -5   4   7 328.658 31.3849   4
  -5  -4   7 335.495 33.3531   4
   5  -4  -7 354.274 29.3318   3
   5  -4  -7 381.893 31.5300   7
  -5  -4   6 1147.80 82.4078   4
  -5   4   6 993.662 79.2773   4
   5  -4  -6 1170.71 86.5772   8
   5  -4  -6 1124.93 77.8575   3
  -5   4   6 1150.67 80.7291   2
  -5  -4   5 62.2397 11.4743   4
  -5   4   5 72.2385 11.0185   4
   5   4  -5 92.2451 10.2816   1
   5  -4  -5 87.2087 10.8342   3
   5  -4  -5 88.3777 16.8470   8
   5  -4  -4 1538.77 117.544   8
   5   4  -4 1520.91 106.469   1
  -5  -4   4 1615.15 110.071   4
  -5   4   4 1470.84 108.059   4
   5  -4  -4 1659.97 107.395   3
   5  -4  -4 1564.32 107.560   6
  -5   4   4 1691.08 111.524   2
   5  -4  -3 75.1063 9.34018   3
   5   4  -3 76.3098 10.6104   6
   5  -4  -3 76.3859 10.1233   6
   5   4  -3 79.0947 9.70074   1
   5  -4  -3 72.4262 16.2903   8
  -5  -4   3 58.0035 10.1414   4
  -5   4   3 75.9448 10.1681   4
  -5  -4   2 1087.93 73.4918   7
   5  -4  -2 989.400 83.3205   8
  -5   4   2 1032.21 76.9844   2
   5   4  -2 969.637 73.3028   1
   5   4  -2 1000.88 73.4370   4
   5  -4  -2 1038.93 71.4202   3
   5   4  -2 1161.00 75.1553   6
   5  -4  -2 1111.99 74.1248   6
   5   4  -1 381.219 31.4689   6
   5  -4  -1 431.576 31.7401   6
   5  -4  -1 468.309 41.6807   8
  -5   4   1 411.569 34.4793   2
   5   4  -1 340.493 30.5668   1
   5   4  -1 388.330 30.1977   4
   5  -4  -1 389.658 28.1795   3
  -5  -4   1 359.661 29.6521   7
   5  -4   0 289.282 31.7799   8
  -5   4   0 281.437 26.4126   2
   5   4   0 274.906 22.3553   4
  -5   4   0 259.621 25.0905   5
   5  -4   0 262.776 19.7652   3
  -5  -4   0 249.110 21.4490   7
  -5   4  -1 864.464 64.9925   6
  -5  -4  -1 904.197 65.1292   6
  -5  -4  -1 939.828 63.0564   7
   5  -4   1 886.169 74.6057   8
  -5   4  -1 907.800 69.0323   2
   5  -4   1 871.436 60.8656   3
  -5   4  -1 942.565 68.5367   5
   5   4   1 935.811 64.2282   4
   5  -4   1 971.766 64.6451   4
   5  -4   2 1.74656 6.98826   2
  -5  -4  -2 15.5979 7.32303   1
  -5   4  -2 4.43232 4.56975   6
  -5  -4  -2 3.15458 4.45054   6
   5   4   2 14.5249 5.29274   5
  -5   4  -2 9.80944 6.72207   5
  -5   4  -2 11.0810 6.84205   2
   5  -4   2 6.80350 2.39409   3
   5   4   2 7.33136 3.37528   3
   5  -4   2 15.6800 9.53474   8
  -5  -4  -3 978.492 79.8710   1
   5  -4   3 1098.41 71.6378   3
   5   4   3 1130.91 72.6779   3
  -5   4  -3 1044.84 80.2431   2
  -5   4  -3 1033.05 78.4253   6
  -5  -4  -3 1070.58 77.9063   6
   5   4   3 1108.87 74.7621   5
  -5   4  -3 962.126 80.1594   5
   5  -4   3 1141.09 82.5480   2
  -5   4  -4 161.264 18.9969   2
  -5   4  -4 129.386 18.4480   5
   5   4   4 160.888 14.7338   5
  -5  -4  -4 140.166 18.9052   1
   5   4   4 147.745 12.1633   3
   5   4   5 441.199 32.1169   5
  -5   4  -5 391.154 38.7643   5
  -5   4  -5 362.628 35.5000   2
   5  -4   5 415.080 42.2537   8
   5   4   5 423.803 28.9666   3
  -5  -4  -5 359.972 37.2456   1
  -5   4  -6 721.573 64.0555   5
   5  -4   6 653.235 65.3374   8
  -5   4  -6 615.753 58.3561   2
   5   4   6 808.541 52.6119   3
  -5  -4  -6 645.340 61.7870   1
  -5  -4  -7 68.4953 16.3925   1
  -5   4  -7 74.9062 16.8813   5
  -5   4  -7 91.8254 13.2970   2
   5  -4   7 62.8122 16.1844   8
   5   4   7 94.3562 8.56520   3
  -5   4  -8 581.468 56.1707   5
   5  -4   8 620.907 57.1315   8
  -5   4  -8 551.145 47.4321   2
  -5  -4  -8 478.862 51.6550   1
   5   4   8 663.313 42.3288   3
  -5  -4  -9 102.510 19.3237   1
  -5   4  -9 71.1629 19.4360   5
  -5   4  -9 110.113 13.4621   2
   5   4   9 74.5879 8.76930   2
   5  -4   9 113.576 21.7543   8
   5   4  10 335.487 26.0439   2
   5  -4  10 487.088 43.9913   8
  -5   4 -10 443.407 46.8147   5
  -5   4 -11 93.0567 23.9271   5
   5  -4  11 211.776 27.4844   8
  -5   4 -12 48.3477 18.6129   5
   5  -4  12 76.7242 18.7567   8
  -5  -4 -12 60.7151 18.4780   1
  -5   4 -13 130.611 28.8929   5
   5  -4  13 181.403 27.2934   8
  -5  -4 -13 188.951 29.2722   1
  -5   4 -14 3.94250 15.2938   5
   5  -4  14-2.58899 11.1626   8
  -5  -4 -14-3.10837 14.9121   1
  -5   4 -15 27.7148 21.6138   5
  -5  -4 -15 66.6642 21.5451   1
  -5  -4 -16 77.5753 22.6964   1
   5  -5 -16 3.43169 10.5882   3
   5  -5 -15 277.014 25.8417   7
   5  -5 -15 140.024 21.0950   3
   5  -5 -14 41.8154 13.5273   7
   5  -5 -14 50.4882 13.1130   3
   5  -5 -13 176.374 20.8077   7
   5  -5 -13 144.010 19.7961   3
   5  -5 -12 285.311 28.4033   7
   5  -5 -11 35.8905 10.7148   7
   5  -5 -10 301.128 27.9987   7
   5  -5 -10 276.416 27.5157   3
   5  -5  -9 159.232 18.7074   7
  -5  -5   9 160.114 23.1325   4
  -5   5   9 115.320 18.2057   4
   5  -5  -9 195.323 19.5169   3
  -5   5   8 233.142 23.7126   2
   5  -5  -8 215.155 23.4075   7
   5  -5  -8 259.926 23.1871   3
  -5  -5   8 286.930 28.8553   4
  -5   5   8 223.849 24.0075   4
   5   5  -8 222.541 18.3770   1
  -5  -5   7 469.393 39.4393   4
  -5   5   7 357.629 34.8647   4
  -5   5   7 490.192 37.3760   2
   5  -5  -7 404.163 34.0276   3
   5   5  -7 428.914 30.8820   1
   5  -5  -6 68.5576 10.1312   3
  -5   5   6 65.9811 12.0017   2
   5   5  -6 79.2920 8.71304   1
  -5  -5   6 74.0175 13.0042   4
  -5   5   6 70.9738 11.0423   4
  -5  -5   5 481.738 39.2795   4
  -5   5   5 443.910 37.0830   4
   5  -5  -5 461.315 35.6784   3
  -5   5   5 524.189 40.7589   2
   5   5  -5 468.740 34.3939   1
   5  -5  -4 72.8966 9.63881   3
   5  -5  -4 81.1587 10.5959   6
  -5   5   4 104.306 14.1727   2
  -5   5   4 102.441 12.0647   4
   5  -5  -4 100.534 20.1162   8
   5   5  -4 96.1371 10.3916   1
  -5  -5   4 84.5689 12.3222   4
  -5  -5   3 781.674 57.2989   4
  -5   5   3 712.308 55.7570   4
   5   5  -3 857.397 57.1699   6
   5  -5  -3 798.091 55.6263   6
   5  -5  -3 719.381 53.6493   3
   5  -5  -3 714.434 66.2064   8
  -5   5   3 808.495 58.1769   5
  -5   5   2 107.102 13.5693   5
  -5   5   2 67.2931 13.6737   2
   5  -5  -2 109.324 12.2330   6
   5   5  -2 109.877 12.7747   6
   5  -5  -2 91.9805 9.78858   3
   5  -5  -2 100.691 19.5828   8
   5   5  -1 282.901 25.7019   6
   5  -5  -1 307.880 35.6372   8
  -5   5   1 296.077 29.9378   2
   5   5  -1 307.264 24.8391   4
  -5  -5   1 317.242 25.0934   7
   5  -5  -1 294.812 22.7735   3
   5  -5   0 860.921 71.9059   8
  -5   5   0 836.714 65.5905   2
   5   5   0 805.638 58.4599   4
  -5  -5   0 877.161 58.6197   7
   5  -5   0 804.578 56.3609   3
   5   5   1 22.9723 6.31481   4
   5  -5   1 23.3802 6.05369   4
  -5  -5  -1 15.4653 7.57758   1
   5  -5   1 29.5912 12.1991   8
  -5  -5  -1 20.2577 5.50262   7
  -5  -5  -1 13.0587 5.62022   6
  -5   5  -1 13.4036 5.61885   6
  -5   5  -1 17.0733 7.11169   5
  -5   5  -1 31.7045 5.74681   3
   5   5   1 19.5614 4.67074   3
   5  -5   1 19.0271 3.97089   3
  -5   5  -1 9.41651 7.61991   2
  -5   5  -2 550.572 44.0447   6
  -5  -5  -2 549.441 43.6331   6
  -5   5  -2 541.964 47.8606   5
  -5  -5  -2 642.627 47.8581   1
  -5   5  -2 543.481 48.5145   2
  -5   5  -2 582.303 40.6388   3
   5  -5   2 570.345 39.4992   3
   5   5   2 601.088 40.4352   3
   5  -5   2 548.504 53.9396   8
  -5  -5  -2 569.036 40.9775   7
   5   5   3 478.648 32.1770   3
   5  -5   3 460.383 31.1972   3
  -5   5  -3 379.121 39.5367   2
  -5   5  -3 431.130 36.6902   6
  -5  -5  -3 435.373 36.3054   6
  -5   5  -3 396.529 39.9267   5
   5   5   3 483.343 33.6501   5
  -5   5  -3 437.826 31.8477   3
  -5  -5  -3 420.387 39.0547   1
  -5   5  -4 349.251 36.1869   5
   5   5   4 401.908 27.1742   3
  -5   5  -4 393.775 36.5530   2
  -5  -5  -4 355.956 35.2470   1
  -5   5  -4 351.874 26.5545   3
  -5  -5  -4 357.280 32.1577   6
   5   5   4 391.320 28.6263   5
   5   5   5 227.338 18.9374   5
  -5   5  -5 208.042 26.5927   5
   5   5   5 260.954 17.8126   3
  -5   5  -5 225.132 16.7042   3
  -5   5  -5 165.218 23.9348   2
  -5  -5  -5 182.968 24.3927   1
   5  -5   5 194.403 28.5352   8
   5   5   6 13.3097 4.02741   3
   5  -5   6-3.05819 11.1705   8
   5   5   6 17.3564 6.57763   5
  -5   5  -6 24.3846 10.2258   5
  -5  -5  -6-2.15593 10.3717   1
  -5   5  -6 23.2013 10.3192   2
  -5   5  -6 11.6571 3.24206   3
  -5   5  -7 629.059 50.8826   5
   5  -5   7 557.386 49.7749   8
  -5   5  -7 524.589 42.1781   2
  -5  -5  -7 523.946 45.2423   1
   5   5   7 730.717 33.4546   3
  -5   5  -7 369.543 29.9007   3
  -5  -5  -8 4.95729 10.9382   1
  -5   5  -8 3.27944 9.75711   5
   5   5   8-0.97148 3.93171   3
  -5   5  -8 3.41214 7.52896   2
   5  -5   8 3.07464 10.4300   8
   5  -5   9 543.042 53.7942   8
  -5  -5  -9 542.620 51.2998   1
  -5   5  -9 580.889 45.5226   2
  -5   5  -9 445.294 57.3278   5
  -5   5 -10 57.0823 11.5881   2
  -5   5 -10 83.4662 22.0902   5
  -5  -5 -10 50.0853 15.5795   1
   5  -5  10 88.2082 19.8310   8
  -5   5 -11 20.0062 16.0449   5
   5  -5  11 27.0277 14.7612   8
  -5   5 -12 121.763 29.8994   5
   5  -5  12 130.098 23.7194   8
  -5   5 -13 8.64393 16.2721   5
  -5  -5 -13 6.35430 14.3436   1
  -5   5 -14 8.83068 20.5539   5
  -5  -5 -14 92.2273 23.5734   1
  -5   5 -15-4.41322 23.2485   5
  -5  -5 -15 77.8215 22.4189   1
   5  -6 -16 46.6159 14.0127   3
   5  -6 -15-5.01169 10.1885   3
   5  -6 -15-1.58599 10.9674   7
   5  -6 -14 33.6200 11.9835   3
   5  -6 -14 53.6207 13.4133   7
   5  -6 -13 101.396 17.1016   3
   5  -6 -13 136.211 18.1928   7
   5  -6 -12 48.2018 12.0920   7
   5  -6 -11 362.061 33.1492   7
   5  -6 -10 17.3456 9.24104   7
  -5  -6  10 12.4521 12.4113   4
  -5   6  10 7.17733 9.26387   4
   5  -6 -10 3.70042 7.36148   3
  -5  -6   9 819.102 69.7269   4
  -5   6   9 752.928 65.3916   4
   5  -6  -9 980.677 66.8010   7
  -5   6   9 964.089 66.6757   2
   5  -6  -9 829.528 63.3208   3
  -5   6   8 145.383 17.7994   2
  -5   6   8 113.533 16.7182   4
   5  -6  -8 130.473 15.3479   3
  -5  -6   8 153.188 20.8592   4
   5  -6  -7 566.872 42.8070   3
  -5  -6   7 611.680 48.1554   4
  -5   6   7 510.674 43.9323   4
  -5   6   7 559.621 46.0518   2
   5  -6  -6 433.063 33.3107   3
  -5   6   6 426.741 34.6372   4
  -5  -6   6 450.874 37.2269   4
  -5   6   6 355.348 35.7945   2
   5  -6  -5 175.548 17.0595   3
  -5  -6   5 186.396 19.9218   4
  -5   6   5 187.598 18.3881   4
  -5   6   5 198.805 21.9300   2
  -5   6   4 228.686 25.5135   2
  -5   6   4 237.541 23.1371   5
  -5  -6   4 247.562 22.9379   4
  -5   6   4 224.683 21.3464   4
   5  -6  -4 242.720 20.9596   6
   5  -6  -4 231.815 20.1784   3
   5  -6  -3 168.200 16.4009   6
   5   6  -3 171.452 17.3671   6
  -5   6   3 162.112 18.2324   5
   5  -6  -3 157.127 15.1728   3
   5  -6  -2 454.316 48.2945   8
   5  -6  -2 479.495 34.1079   3
   5   6  -2 464.690 36.4947   6
   5  -6  -2 442.958 35.5200   6
  -5   6   2 442.375 38.4682   5
   5   6  -1 470.494 35.8486   4
   5  -6  -1 459.753 48.5855   8
  -5   6   1 449.146 42.6256   2
  -5   6   1 478.312 35.1357   3
   5  -6  -1 457.477 34.0590   3
  -5   6   1 500.400 40.6874   5
  -5  -6   0 129.024 13.5113   7
   5  -6   0 130.665 23.9181   8
   5   6   0 133.280 13.4244   4
  -5   6   0 143.073 13.1655   3
   5  -6   0 117.594 11.6969   3
  -5   6   0 168.565 21.6895   2
   5  -6   1 1499.70 112.389   8
   5  -6   1 1407.35 92.9700   3
   5   6   1 1353.72 94.8937   4
   5  -6   1 1366.28 95.0573   4
  -5  -6  -1 1434.29 94.7904   7
  -5  -6  -1 1440.51 99.2506   1
  -5   6  -1 1340.74 104.022   2
  -5   6  -1 1324.13 95.8435   6
  -5  -6  -1 1408.92 96.2456   6
  -5  -6  -2-1.51082 6.81695   1
   5  -6   2 6.57459 12.3712   8
  -5  -6  -2-1.91554 4.02987   7
  -5  -6  -2 2.98176 5.12183   6
  -5   6  -2 1.04299 4.90640   6
  -5   6  -2-12.1371 7.84697   5
   5  -6   2 0.84301 4.69223   4
   5   6   2-1.61432 4.97975   4
   5  -6   2 3.27638 3.10652   3
  -5   6  -2 2.26157 9.27472   2
  -5   6  -3 1347.31 105.426   5
  -5  -6  -3 1397.14 103.277   1
  -5   6  -3 1308.77 106.358   2
  -5  -6  -3 1484.39 95.4996   7
   5  -6   3 1406.77 94.1480   3
  -5   6  -3 1515.87 94.9817   3
  -5  -6  -3 1267.31 98.3280   6
  -5   6  -3 1389.67 99.7211   6
  -5   6  -4 42.1207 12.2748   5
   5   6   4 40.6884 6.48298   5
  -5   6  -4 28.1704 12.0819   2
  -5  -6  -4 45.6206 12.7635   1
  -5   6  -4 50.4565 10.5819   6
  -5  -6  -4 40.8893 8.87102   6
  -5   6  -4 48.3212 6.23532   3
   5   6   4 65.2992 7.02539   3
  -5   6  -5 251.096 18.5393   3
   5   6   5 265.511 19.3427   3
  -5   6  -5 243.470 30.3441   5
  -5  -6  -5 212.281 27.5823   1
   5   6   5 239.310 19.5736   5
   5  -6   5 164.322 29.0775   8
  -5   6  -5 207.694 27.6740   2
   5   6   6 666.810 42.0686   5
  -5   6  -6 445.702 51.7522   5
  -5  -6  -6 450.621 48.9127   1
  -5   6  -6 432.605 48.7180   2
  -5   6  -6 606.009 39.8595   3
   5  -6   6 542.070 55.3826   8
  -5  -6  -7 68.0919 18.5461   1
  -5   6  -7 40.4749 15.8560   5
   5  -6   7 81.6974 19.2399   8
  -5   6  -7 98.4434 8.59002   3
  -5   6  -7 72.6956 16.7666   2
  -5  -6  -8 285.246 35.4843   1
  -5   6  -8 275.181 32.6469   2
  -5   6  -8 343.999 23.0522   3
   5  -6   8 363.038 39.7373   8
  -5   6  -9 35.4701 18.7034   5
   5  -6   9 51.2323 16.6842   8
  -5   6  -9 39.7403 12.7814   2
  -5  -6  -9 27.6042 15.1221   1
  -5   6 -10 186.124 22.3969   2
  -5  -6 -10 186.932 28.5580   1
   5  -6  10 245.472 32.0115   8
   5  -6  11 94.0182 20.8492   8
  -5   6 -11 53.1325 23.0400   5
  -5  -6 -11 92.6401 21.4027   1
  -5   6 -12-9.24988 16.8631   5
  -5   6 -13 37.8733 28.9685   5
  -5   6 -14 4.82236 17.5738   5
  -5  -6 -14 3.49265 17.6976   1
  -5   6 -15 24.0397 26.7986   5
  -5  -6 -15 223.160 33.1354   1
   5  -7 -15 227.882 25.9724   3
   5  -7 -14 20.9473 10.4494   3
   5  -7 -14 12.2660 10.9446   7
   5  -7 -13 123.654 18.5057   3
   5  -7 -13 169.137 20.9915   7
  -5  -7  12 5.64385 14.0749   4
   5  -7 -12 16.6009 9.24175   7
  -5  -7  11 10.5847 12.7460   4
  -5   7  11 9.43074 8.94621   4
   5  -7 -11 34.9753 10.7673   7
   5  -7 -10 39.1286 10.5640   3
  -5  -7  10 36.7637 14.0446   4
  -5   7  10 39.2061 10.9087   4
   5  -7 -10 33.3348 10.7504   7
  -5   7  10 38.8097 11.3822   2
   5  -7  -9 11.7504 7.94577   3
  -5  -7   9 28.9437 12.4740   4
  -5   7   9 30.7892 9.81976   4
   5  -7  -9 27.1613 10.6244   7
  -5   7   9 20.9750 9.34273   2
  -5  -7   8 82.4161 16.1694   4
  -5   7   8 96.0105 14.0719   4
   5  -7  -8 93.7368 13.1206   3
  -5   7   8 101.226 15.4535   2
   5  -7  -7 178.623 18.7797   3
  -5   7   7 173.486 21.9760   2
  -5  -7   7 211.709 23.0842   4
  -5   7   7 216.211 20.4150   4
  -5   7   6 42.7610 8.78874   4
  -5  -7   6 50.7581 11.4187   4
  -5   7   6 36.7435 11.2951   2
   5  -7  -6 45.7719 8.40456   3
   5  -7  -5 668.918 48.1158   3
  -5   7   5 736.953 55.8786   2
  -5  -7   5 699.583 51.2854   4
  -5   7   5 565.150 47.9342   4
  -5   7   4 5.55398 6.68414   5
  -5  -7   4 10.6219 6.20722   4
  -5   7   4 7.72774 5.98528   4
   5  -7  -4 5.13808 4.99745   6
  -5   7   4 10.3026 9.51342   2
   5  -7  -4 14.3077 5.91462   3
   5   7  -3 1635.99 106.184   6
   5  -7  -3 1436.36 104.196   6
   5  -7  -3 1516.99 103.546   3
  -5   7   3 1566.65 108.833   5
   5   7  -2 45.2248 9.16429   6
   5  -7  -2 46.6307 7.14780   3
  -5   7   2 38.4302 10.7196   5
  -5   7   1 399.398 39.9816   2
  -5   7   1 386.837 36.3910   5
   5  -7  -1 408.251 30.3388   3
  -5   7   0 164.062 24.1234   2
   5   7   0 195.600 17.7281   4
  -5   7   0 172.855 22.4115   5
   5  -7   0 197.831 16.5825   3
   5  -7   0 202.509 30.3890   8
  -5  -7   0 219.657 20.6405   1
  -5  -7  -1 111.471 15.8499   1
  -5   7  -1 136.569 21.2951   2
   5   7   1 121.029 13.3755   4
   5  -7   1 137.694 13.8571   4
   5  -7   1 127.302 11.9409   3
   5  -7   1 168.215 26.8469   8
  -5  -7  -1 135.869 13.7546   7
  -5   7  -1 124.745 12.5032   3
  -5   7  -2 42.7492 8.09820   6
  -5  -7  -2 61.0392 8.84760   6
  -5   7  -2 65.2828 15.6521   2
  -5   7  -2 49.4264 7.20999   3
  -5  -7  -2 38.2154 7.22131   7
   5  -7   2 51.1377 8.67331   4
   5   7   2 40.7274 7.98626   4
   5  -7   2 54.4389 6.65409   3
   5  -7   2 31.7733 16.2275   8
  -5  -7  -2 48.3594 11.1246   1
  -5   7  -3 42.2027 13.8997   5
  -5  -7  -3 89.0603 15.9492   1
  -5  -7  -3 67.3367 10.4229   6
  -5   7  -3 87.8059 11.7001   6
   5  -7   3 93.3801 8.64901   3
   5  -7   3 63.1314 20.1293   8
  -5  -7  -3 76.1980 9.13992   7
  -5   7  -3 45.7187 14.7020   2
   5   7   4 166.215 15.7648   5
  -5   7  -4 190.192 20.1718   6
  -5   7  -4 161.811 24.7769   5
  -5  -7  -4 190.283 23.8680   1
  -5  -7  -4 220.155 16.0839   7
  -5  -7  -4 188.349 19.1599   6
  -5   7  -4 157.537 25.5885   2
   5   7   5 574.374 39.7217   5
  -5  -7  -5 521.450 44.3975   6
  -5   7  -5 555.472 54.4198   5
  -5  -7  -5 469.441 48.2938   1
  -5   7  -5 528.917 52.0460   2
  -5   7  -5 585.486 39.6524   3
   5  -7   5 575.531 57.2123   8
  -5   7  -6-5.41296 9.19588   2
  -5   7  -6 23.9150 14.3843   5
   5   7   6 7.77959 3.82992   5
  -5   7  -6 10.6336 4.39665   3
   5  -7   6 3.42388 11.6264   8
  -5  -7  -6 9.43626 11.5447   1
  -5   7  -7 914.593 94.1468   5
  -5   7  -7 1244.13 76.8444   3
  -5   7  -7 1039.15 90.1895   2
  -5  -7  -7 882.475 87.6722   1
   5  -7   7 1177.21 96.1271   8
  -5   7  -8-4.03307 15.1791   5
   5  -7   8-3.33234 12.9282   8
  -5   7  -8-2.56975 11.8459   2
  -5  -7  -8-2.71405 11.9784   1
  -5  -7  -9 518.239 52.5978   1
  -5   7  -9 564.592 50.6233   2
  -5   7  -9 521.429 59.5955   5
  -5   7 -10 9.17145 18.8062   5
  -5  -7 -10 3.06862 13.5417   1
  -5   7 -10-2.21874 10.0114   2
  -5  -7 -11 90.9567 22.1193   1
  -5   7 -11 81.4111 27.2410   5
  -5  -7 -12 20.5123 17.9442   1
  -5   7 -12 14.9367 16.9274   5
  -5   7 -13-10.1573 20.2827   5
  -5   7 -14-5.14489 21.1018   5
  -5   7 -15 35.7971 26.0121   5
  -5   7 -16 15.1074 21.7333   5
  -5  -8  15 18.5308 16.7348   4
  -5  -8  14 20.9891 15.7321   4
  -5   8  14 11.6689 12.4527   4
   5  -8 -14 16.6440 11.1085   3
   5  -8 -14 9.29958 10.9487   7
   5  -8 -13 217.570 23.0083   7
  -5  -8  13 155.743 27.5807   4
  -5   8  13 128.905 23.3284   4
   5  -8 -13 188.161 21.8940   3
   5  -8 -12 10.9406 10.4147   7
  -5  -8  12 5.48376 13.4174   4
  -5   8  12 9.80705 11.2406   4
  -5   8  11 328.594 28.0959   2
  -5  -8  11 164.594 28.9667   4
   5  -8 -11 269.196 27.1553   7
  -5   8  11 231.908 26.4900   4
   5  -8 -10 54.0522 11.5400   3
  -5   8  10 52.8380 13.5620   2
   5  -8 -10 44.0576 13.5120   7
  -5  -8  10 51.8807 15.1072   4
  -5   8  10 61.4412 13.6932   4
  -5   8   9 745.633 57.1441   2
  -5  -8   9 599.666 57.4542   4
  -5   8   9 706.100 54.7891   4
   5  -8  -9 720.098 53.7515   3
  -5   8   8 35.1936 11.9660   2
   5  -8  -8 24.1022 8.83789   3
  -5  -8   8 50.4905 12.7024   4
  -5   8   8 21.8614 8.06002   4
  -5   8   7 297.009 32.1333   2
   5  -8  -7 365.907 29.3469   3
  -5  -8   7 323.738 31.3163   4
  -5   8   7 332.979 28.8718   4
  -5  -8   6 51.9377 10.8831   4
  -5   8   6 51.9006 9.33801   4
   5  -8  -6 45.3444 8.66650   3
  -5   8   6 44.2644 12.3011   2
  -5  -8   5 84.4758 12.5352   4
   5  -8  -5 72.2091 10.2920   3
  -5   8   5 69.2596 10.8077   4
  -5   8   5 66.7488 15.8156   2
   5  -8  -4 25.8743 6.93995   6
   5  -8  -4 27.1174 6.91987   3
  -5   8   4 18.6643 11.3428   2
  -5   8   4 45.2041 9.99281   5
   5  -8  -3 137.286 15.5624   6
  -5   8   3 162.996 19.5945   5
   5   8  -3 158.004 16.7381   6
   5  -8  -3 165.639 15.5914   3
   5  -8  -2 24.9437 6.26656   3
  -5   8   2 30.0781 10.5321   5
  -5   8   1 600.269 56.5101   2
   5  -8  -1 631.998 45.4572   3
  -5   8   1 648.868 53.5081   5
   5  -8   0 2.53200 4.08318   3
  -5   8   0-13.0897 9.17938   5
  -5  -8   0-1.20900 7.45903   1
  -5   8   0 8.34728 12.2787   2
   5   8   0 2.30199 5.10506   4
   5   8   1 1005.57 69.0970   4
  -5   8  -1 871.029 80.8639   2
  -5  -8  -1 1083.67 74.2663   1
   5  -8   1 993.556 68.1003   3
  -5   8  -1 907.628 77.7343   5
  -5  -8  -2 4.91530 5.86989   7
  -5  -8  -2 5.39280 4.93084   6
  -5   8  -2 0.93084 4.95415   6
   5  -8   2-1.71065 3.97871   3
  -5  -8  -2 1.63358 7.83688   1
   5   8   2-0.76504 5.14030   4
   5  -8   2-0.79125 5.15769   4
  -5   8  -2-5.90611 10.7605   2
   5  -8   3 1115.92 74.0230   3
   5  -8   3 1155.40 76.3388   4
  -5  -8  -3 1071.23 82.4120   1
  -5  -8  -3 1033.73 76.4556   6
  -5   8  -3 974.043 76.5869   6
  -5   8  -3 997.498 88.0154   2
  -5  -8  -3 1140.69 74.9414   7
  -5  -8  -4-0.59171 4.05704   7
  -5  -8  -4 5.50274 5.95097   6
  -5   8  -4 9.95918 6.73080   6
  -5   8  -4-1.22608 4.65372   3
  -5   8  -4 18.3914 13.2169   2
  -5   8  -4 9.25813 11.9727   5
  -5  -8  -4 8.29187 11.0342   1
  -5  -8  -5 241.887 17.4987   7
  -5   8  -5 118.438 26.5929   5
  -5   8  -5 275.073 33.2180   2
  -5   8  -5 225.183 17.7547   3
  -5  -8  -5 165.609 24.8689   1
  -5  -8  -5 180.038 20.6936   6
  -5   8  -5 214.279 22.8890   6
   5   8   5 218.839 17.2700   5
  -5   8  -6-3.70721 12.0872   5
  -5   8  -6 9.25597 11.2476   2
  -5  -8  -6 2.45727 12.6673   1
  -5  -8  -6 8.54729 7.70682   6
  -5   8  -7-3.04531 11.0970   2
  -5   8  -7 4.06956 13.2636   5
  -5  -8  -7-2.64120 11.1133   1
  -5   8  -8 14.7186 12.9981   2
  -5   8  -8 4.33546 12.9066   5
  -5  -8  -8 2.84388 12.2695   1
  -5   8  -9 44.9607 15.8030   2
  -5   8  -9 42.0659 19.9710   5
  -5  -8  -9 82.0672 20.5178   1
  -5   8 -10 31.2240 15.1915   2
  -5   8 -10 9.76009 19.0109   5
  -5  -8 -10 35.4951 16.7198   1
  -5   8 -11 5.07362 19.8197   5
  -5  -8 -11 85.4845 24.8211   1
  -5   8 -12-5.24937 18.4920   5
  -5  -8 -12 28.8133 19.7705   1
  -5   8 -13 111.909 37.5677   5
  -5  -8 -13 276.342 38.0563   1
  -5   8 -14-10.7453 19.5893   5
  -5   8 -15 53.2092 27.6330   5
  -5  -9  15 159.797 29.7054   4
  -5   9  15 182.186 27.5149   4
   5  -9 -14 1.67397 10.4530   3
  -5  -9  14 2.88046 14.3446   4
  -5   9  14 13.1663 12.5633   4
   5  -9 -13 97.6077 16.7979   3
  -5  -9  13 74.7518 21.2969   4
  -5   9  13 90.9083 19.4632   4
  -5  -9  12-10.4387 14.5296   4
  -5   9  12-5.54805 11.2812   4
   5  -9 -12-1.60137 10.1125   7
  -5   9  12-3.38497 9.42661   2
  -5  -9  11 12.0977 11.4496   4
  -5   9  11 16.7718 9.93233   4
   5  -9 -11 22.7505 10.3311   7
  -5   9  11 24.8482 10.7643   2
   5  -9 -10-1.34829 7.71678   3
  -5  -9  10-8.79005 12.2319   4
  -5   9  10 15.0418 8.95099   4
   5  -9 -10 3.29127 9.41830   7
  -5   9  10 1.85594 10.0313   2
  -5  -9   9 45.5742 13.3231   4
  -5   9   9 33.6311 9.92555   4
  -5   9   9 56.3655 13.9452   2
   5  -9  -9 40.3783 10.2891   3
  -5   9   8 13.3513 7.43910   4
  -5  -9   8 12.1792 9.14537   4
   5  -9  -8 9.40876 7.46105   3
  -5   9   8 12.4691 10.3737   2
   5  -9  -7 394.489 31.4953   3
  -5   9   7 343.489 36.3505   2
  -5  -9   7 377.008 33.6405   4
  -5   9   7 336.898 30.2424   4
  -5   9   6-4.73527 11.5774   2
   5  -9  -6 7.34593 7.39274   3
  -5  -9   6 4.13375 7.45142   4
  -5   9   6 5.15141 6.05862   4
  -5   9   5 559.453 45.0199   5
  -5   9   5 557.250 50.1967   2
   5  -9  -5 516.172 41.3357   3
   5  -9  -4 32.5518 7.55580   3
  -5   9   4 31.5442 13.0155   2
  -5   9   4 31.3278 10.3796   5
  -5   9   3 1007.64 71.1832   5
   5   9  -3 883.557 65.9225   6
   5  -9  -3 878.938 64.3341   3
   5  -9  -2 5.58046 5.76289   3
  -5   9   2-1.94733 7.77429   5
  -5   9   1 290.418 34.3747   2
  -5   9   1 266.439 29.6239   5
   5  -9  -1 254.392 21.9332   3
   5  -9   0 2.09977 4.56244   3
  -5   9   0-4.75588 10.0053   5
  -5   9   0 3.09371 10.8908   2
  -5  -9   0-3.71683 7.73206   1
   5  -9   1 51.8101 7.75428   3
  -5  -9  -1 37.6460 10.2971   1
  -5   9  -1 50.3802 14.3568   5
  -5   9  -1 38.2591 15.8893   2
   5   9   1 51.5009 8.53095   4
   5  -9   2 6.64907 4.86163   3
  -5   9  -2 6.55250 13.7906   2
  -5  -9  -2 5.07546 8.72714   1
  -5   9  -2 2.71156 10.8307   5
   5   9   2 7.32327 5.35150   4
   5  -9   2 5.38762 5.48120   4
   5  -9   3 124.439 12.6754   3
   5  -9   3 113.318 13.5914   4
  -5  -9  -3 131.743 13.9869   6
  -5   9  -3 128.623 14.1809   6
  -5   9  -3 120.095 24.6151   2
  -5  -9  -3 109.729 17.9792   1
  -5  -9  -3 132.400 13.7720   7
  -5  -9  -4 8.17289 5.61374   6
  -5   9  -4 1.13778 5.57157   6
  -5  -9  -4 6.72106 5.06894   7
  -5   9  -4-3.38542 12.3401   2
  -5   9  -4 13.4127 14.8007   5
  -5  -9  -4 6.45047 12.7983   1
  -5  -9  -5 284.900 21.5840   7
  -5  -9  -5 274.092 24.8991   6
  -5   9  -5 281.524 26.1908   6
   5   9   5 264.535 20.7798   5
  -5   9  -5 274.425 36.9221   5
  -5  -9  -5 270.359 31.8362   1
  -5   9  -5 207.298 32.8797   2
  -5   9  -6 11.9927 14.0728   5
  -5   9  -6 3.40518 11.9874   2
  -5  -9  -6-5.11386 11.7854   1
  -5   9  -6-4.72988 7.70794   6
  -5  -9  -6-1.31992 7.02511   6
  -5   9  -7 507.046 57.0244   5
  -5  -9  -7 440.871 48.9247   1
  -5   9  -7 597.190 55.6980   2
  -5  -9  -7 522.947 43.4179   6
  -5   9  -8 4.63357 17.9750   5
  -5   9  -8 6.59958 13.1724   2
  -5  -9  -8-2.99114 13.2005   1
  -5  -9  -9 438.966 46.9667   1
  -5   9  -9 448.363 46.9460   2
  -5   9  -9 348.021 52.1897   5
  -5   9 -10-2.95820 13.6378   2
  -5  -9 -10 23.8594 19.2431   1
  -5   9 -10-20.6455 19.4262   5
  -5  -9 -11 130.133 27.7778   1
  -5   9 -11 42.7236 28.0842   5
  -5  -9 -12 19.0318 18.9841   1
  -5   9 -12 16.4999 18.6922   5
  -5  -9 -13-4.00005 19.9231   1
  -5   9 -13 22.2270 20.9206   5
  -5   9 -14-5.57767 20.3273   5
  -5 -10  15-2.76550 14.7195   4
  -5 -10  14 29.5061 15.8745   4
   5 -10 -13 123.201 18.7785   3
  -5 -10  13 107.615 21.5068   4
   5 -10 -13 114.610 19.1121   7
  -5 -10  12 16.8278 12.4050   4
  -5  10  12 8.51966 10.6536   4
  -5  10  12 5.44347 10.5434   2
   5 -10 -12 11.3770 10.9393   7
  -5  10  11 178.273 22.1418   4
  -5  10  11 210.638 25.2593   2
   5 -10 -11 198.167 22.8281   3
  -5 -10  11 153.754 24.3466   4
  -5  10  10 10.1200 10.9454   2
   5 -10 -10 9.96339 9.57043   3
  -5 -10  10-2.02955 10.9753   4
  -5  10  10 6.95324 8.07379   4
  -5  10   9 390.425 40.2811   2
  -5 -10   9 415.404 39.0592   4
  -5  10   9 451.131 36.4904   4
   5 -10  -9 454.389 37.3412   3
  -5  10   8 11.5650 11.7192   2
   5 -10  -8-2.52095 7.59386   3
  -5 -10   8-1.62469 8.23195   4
  -5  10   8-3.43018 7.37532   4
  -5  10   7 227.675 28.1669   2
   5 -10  -7 243.506 21.8402   3
  -5 -10   7 166.665 21.0337   4
  -5  10   7 187.614 19.9496   4
  -5  10   6 2.64419 12.4388   2
   5 -10  -6 6.78858 7.60209   3
  -5  10   6-2.93875 6.04366   4
   5 -10  -5 65.2091 11.4615   3
  -5  10   5 64.1445 17.1308   2
  -5  10   5 68.2782 13.6567   5
   5 -10  -4 5.81007 6.13070   3
  -5  10   4 5.84696 11.3510   2
  -5  10   4 12.4049 8.83574   5
  -5  10   3 88.9677 20.3936   2
  -5  10   3 101.780 17.1937   5
   5 -10  -3 101.699 12.8781   3
   5 -10  -2 1.72441 5.50614   3
  -5  10   2 8.46433 9.55046   5
  -5  10   1 281.881 36.9602   2
  -5  10   1 290.450 32.1912   5
   5 -10  -1 288.372 24.1898   3
  -5 -10   0 5.03873 7.40536   1
   5 -10   0 5.59743 5.58480   3
  -5  10   0 6.85076 12.4839   2
  -5  10   0-2.57927 10.5804   5
  -5  10  -1 686.336 64.1834   2
  -5  10  -1 692.020 59.9886   5
  -5 -10  -1 647.723 52.0171   1
   5 -10   1 632.186 47.1598   3
  -5 -10  -2-6.97289 9.13168   1
  -5  10  -2 5.95386 11.8829   5
  -5  10  -2-3.61237 14.4193   2
   5 -10   2 1.51705 5.14632   3
  -5  10  -3 718.515 66.5746   2
  -5 -10  -3 649.254 55.9601   1
  -5  10  -4-7.42098 13.9643   2
  -5 -10  -4 8.89610 11.6508   1
  -5  10  -4-1.02441 5.70306   6
  -5 -10  -4 4.57975 5.51913   6
  -5 -10  -5 236.413 21.5058   6
  -5  10  -5 249.835 22.9088   6
  -5 -10  -5 197.626 28.5765   1
  -5  10  -5 190.744 32.2529   2
  -5  10  -5 193.328 33.4677   5
  -5  10  -6 18.4749 15.5780   2
  -5  10  -6 12.8658 15.6580   5
  -5 -10  -6 16.0535 14.7112   1
  -5 -10  -6 11.8921 8.57768   6
  -5  10  -6 18.4236 8.89914   6
  -5  10  -7 25.5337 17.0105   2
  -5  10  -7 9.20785 20.0175   5
  -5 -10  -7 49.4621 17.9280   1
  -5  10  -7 44.7514 11.9528   6
  -5 -10  -7 48.0909 11.1958   6
  -5  10  -8-3.58184 14.2975   2
  -5  10  -8-4.92250 18.5251   5
  -5 -10  -8 12.5486 16.1663   1
  -5 -10  -8-1.56787 8.60150   6
  -5  10  -9 77.7846 27.1233   5
  -5  10  -9 58.9323 19.8468   2
  -5 -10  -9 87.5850 24.1680   1
  -5  10 -10-5.35904 18.8741   5
  -5  10 -10 6.50942 16.2136   2
  -5 -10 -10 28.8250 20.0635   1
  -5  10 -11 77.1678 30.9966   5
  -5 -10 -11 130.060 28.6980   1
  -5  10 -12 16.9450 24.3598   5
  -5 -10 -12 4.03047 20.0743   1
  -5  10 -13 136.215 39.8526   5
   5 -11 -12 23.3004 13.1415   7
  -5  11  12 9.88874 12.1031   2
   5 -11 -11 6.91489 10.9592   7
  -5 -11  11 25.9241 13.6977   4
   5 -11 -11 18.8780 11.2220   3
  -5  11  11 16.6443 12.4229   2
  -5 -11  10 23.8475 12.0242   4
   5 -11 -10 22.4752 11.6082   3
  -5  11  10 13.2927 11.2959   2
  -5 -11   9 51.4314 13.1182   4
   5 -11  -9 49.8895 13.0210   3
  -5  11   9 57.0439 16.6226   2
  -5 -11   8 60.4891 13.5694   4
   5 -11  -8 109.014 15.0554   3
  -5  11   8 69.9768 18.9500   2
  -5  11   7 231.414 31.9443   2
   5 -11  -7 285.547 26.2119   3
   5 -11  -6 82.2548 13.1111   3
  -5  11   6 76.0080 20.6856   2
  -5  11   5 313.686 38.2991   2
  -5  11   5 303.510 31.2177   5
   5 -11  -5 336.818 28.4946   3
  -5  11   4 20.8690 10.7713   5
   5 -11  -4 17.7532 7.69712   3
  -5  11   4 12.9401 14.3222   2
  -5  11   3 321.848 42.6711   2
   5 -11  -3 398.194 32.8560   3
   5 -11  -2 0.93609 6.10548   3
  -5  11   2 11.4457 10.7706   5
  -5  11   1 189.919 25.8732   5
  -5  11   1 141.175 27.9721   2
   5 -11  -1 159.710 16.6807   3
  -5 -11   0 85.2270 14.0948   1
   5 -11   0 74.1418 10.5621   3
  -5  11   0 71.1065 21.1394   2
  -5  11   0 86.3765 19.7378   5
  -5 -11  -1 93.5085 14.9589   1
  -5  11  -1 73.8755 19.8940   5
   5 -11   1 91.4905 11.5775   3
  -5  11  -1 81.1281 22.2456   2
  -5 -11  -2 110.570 18.0110   1
  -5  11  -2 109.778 24.7290   2
  -5  11  -2 69.9031 18.7839   5
   5 -11   2 101.116 12.1155   3
  -5  11  -3 55.8637 19.6035   5
  -5  11  -3 63.6974 21.9175   2
  -5 -11  -3 71.7042 16.6577   1
  -5  11  -4 56.1988 20.7149   2
  -5 -11  -4 64.3227 17.1972   1
  -5  11  -5 188.039 18.9210   6
  -5  11  -5 204.917 32.8991   2
  -5 -11  -5 159.393 25.6997   1
  -5  11  -6 4.51557 17.0196   5
  -5  11  -6 12.3442 8.10114   6
  -5 -11  -6 25.0614 15.7472   1
  -5  11  -6 23.9433 18.4170   2
  -5 -11  -7 385.997 42.7820   1
  -5  11  -7 373.307 32.8022   6
  -5  11  -7 402.672 46.6675   2
  -5 -11  -8 6.57421 17.4947   1
  -5  11  -8 34.4287 17.9956   2
  -5  11  -8-10.1427 20.7977   5
  -5  11  -8-5.08455 9.95845   6
  -5 -11  -9 254.681 36.8266   1
  -5  11  -9 222.114 34.5589   2
  -5 -11 -10 7.57985 17.4738   1
  -5  11 -10 5.52676 19.4607   5
  -5  11 -10 6.99415 15.7852   2
  -5 -11 -11 28.2016 20.4132   1
  -5  11 -11-16.9810 23.8171   5
  -5  12  12 23.2526 14.2817   2
  -5  12  11 80.6917 18.9742   2
   5 -12 -11 142.992 20.9518   7
  -5  12  10 2.42442 12.7012   2
   5 -12 -10 3.00333 10.4793   3
  -5  12   9 186.244 27.3646   2
   5 -12  -9 169.967 20.7587   3
  -5  12   8 8.51456 14.1300   2
   5 -12  -8-1.36357 9.07196   3
  -5  12   7 33.1854 17.6707   2
   5 -12  -7 40.4254 11.2488   3
  -5  12   6 28.8956 15.2965   2
   5 -12  -6 41.8787 10.8322   3
  -5  12   5 57.3563 18.4641   2
  -5  12   5 40.1772 13.2924   5
   5 -12  -5 44.1571 10.6582   3
  -5  12   4 56.6740 20.1276   2
  -5  12   4 58.6703 13.9263   5
   5 -12  -4 67.5008 11.5061   3
  -5  12   3 44.1323 13.2666   5
   5 -12  -3 37.3583 8.86029   3
  -5  12   2 41.6629 15.4348   5
   5 -12  -2 50.8200 10.1923   3
   5 -12  -1 213.272 21.3317   3
  -5  12   1 283.712 31.5034   5
  -5  12   1 208.720 35.4505   2
  -5 -12   0 17.7855 8.88459   1
  -5  12   0 16.2742 17.1292   2
   5 -12   0 2.93454 6.47038   3
  -5  12   0 14.9746 15.1859   5
  -5  12  -1 361.385 44.7377   2
  -5 -12  -1 316.122 30.6352   1
  -5  12  -1 279.263 36.9714   5
   5 -12   1 317.993 27.1339   3
  -5  12  -2 3.37088 14.1928   5
  -5 -12  -2 3.61966 10.3706   1
  -5  12  -2 33.7334 20.9990   2
   5 -12   2 8.52110 7.31003   3
  -5 -12  -3 175.550 23.8597   1
  -5  12  -3 220.999 35.2211   2
  -5 -12  -4 44.9396 16.0718   1
  -5  12  -4 52.7267 21.1553   5
  -5  12  -4 59.7555 21.8714   2
  -5  12  -5 59.8113 23.1364   2
  -5 -12  -5 10.4698 13.3418   1
  -5  12  -6 46.6602 22.1523   2
  -5 -12  -6 63.3347 20.2253   1
  -5  12  -7 66.3384 22.1641   2
  -5  12  -7 9.92583 15.6251   5
  -5 -12  -7 40.9745 19.5562   1
  -5  12  -8 16.1171 17.0348   2
  -5  12  -8 31.5680 22.7449   5
  -5 -12  -8 34.3064 19.4373   1
  -5  12  -9 31.1544 18.6954   2
  -5  12  -9-5.47965 22.4830   5
  -5 -12  -9 14.8102 19.7180   1
  -5  12 -10 11.0826 18.7224   2
  -5  12 -10 5.68352 22.0520   5
  -5 -12 -10 3.96182 19.0116   1
  -5  13  11 21.6862 14.9313   2
  -5  13  10 75.6588 19.4738   2
   5 -13  -9 5.95831 10.0315   3
  -5  13   9 22.7814 16.3111   2
   5 -13  -8 58.0403 13.1489   3
  -5  13   8 52.2874 21.1822   2
   5 -13  -7 109.704 16.3213   3
  -5  13   7 88.3855 22.7644   2
   5 -13  -6 61.8066 12.6838   3
  -5  13   6 48.8451 20.3171   2
  -5  13   5 155.702 22.5539   5
  -5  13   5 160.356 29.0710   2
   5 -13  -5 178.518 20.0493   3
   5 -13  -4 25.3072 9.15134   3
  -5  13   4 27.7501 11.9970   5
  -5  13   4 23.1445 18.2219   2
  -5  13   3 220.024 27.5473   5
  -5  13   3 199.916 34.0317   2
   5 -13  -3 206.720 21.4834   3
  -5  13   2 25.9246 15.1142   5
   5 -13  -2 23.2287 8.96396   3
  -5  13   1 66.7446 18.7264   5
   5 -13  -1 40.4945 9.94822   3
  -5  13   1 29.6231 19.2973   2
  -5  13   0 172.532 28.1139   5
   5 -13   0 139.962 16.5641   3
  -5  13   0 126.369 29.5897   2
  -5  13  -1 13.5584 15.0147   5
   5 -13   1 22.2433 9.06295   3
  -5  13  -1 22.1749 20.4829   2
  -5 -13  -2 127.255 19.3561   1
  -5  13  -2 94.2422 25.6191   2
  -5 -13  -3 37.9537 15.3194   1
  -5  13  -3 3.89893 16.8841   5
  -5  13  -3 36.2293 19.1199   2
  -5 -13  -4 103.699 20.7549   1
  -5  13  -4 50.4724 23.3661   5
  -5  13  -4 94.6804 27.0362   2
  -5 -13  -5 93.8361 22.0114   1
  -5  13  -5 45.3704 22.6275   5
  -5  13  -5 67.4273 24.7038   2
  -5 -13  -6 50.5402 19.9926   1
  -5  13  -6 39.9867 20.2587   2
  -5 -13  -7 97.5101 23.7610   1
  -5  13  -7 129.810 29.3654   2
  -5 -13  -8-14.2003 17.3559   1
  -5  13  -8 16.7757 18.9238   2
  -5  13  -8 5.35680 20.1599   5
  -5  13  -9 84.8721 25.2070   2
  -5 -13  -9 38.3981 21.0801   1
  -5  14   9 27.6559 18.3713   2
  -5  14   8 6.62484 17.0748   2
  -5  14   7 3.53472 17.2883   2
   5 -14  -7 9.90100 9.70229   3
  -5  14   6 63.6397 22.6997   2
   5 -14  -6 96.7043 15.1377   3
  -5  14   5 9.97116 11.4133   5
  -5  14   5 3.93897 17.3827   2
   5 -14  -5-9.32472 9.03832   3
  -5  14   4 91.2466 19.0013   5
  -5  14   4 74.4997 25.4861   2
   5 -14  -4 79.1464 14.1245   3
  -5  14   3 22.0252 13.7150   5
  -5  14   3 21.4342 21.7783   2
   5 -14  -3 27.0587 10.1482   3
   5 -14  -2 71.6745 13.5595   3
  -5  14   2 67.9485 18.2876   5
   5 -14  -1 20.2792 10.0992   3
  -5  14   1 12.1691 14.0659   5
   5 -14   0 15.1720 9.16390   3
  -5  14   0 13.9156 16.3530   2
  -5  14   0 10.0839 15.1924   5
  -5  14  -1 75.2606 25.5165   2
  -5  14  -1 17.9486 15.9916   5
  -5  14  -2 9.48878 19.4595   2
  -5  14  -2-11.3205 19.1215   5
  -5  14  -3 56.9491 24.2642   2
  -5  14  -3 44.3452 23.9093   5
  -5  14  -4 37.8457 20.5298   2
  -5  14  -4 21.7027 21.3481   5
  -5 -14  -4 45.9180 18.4801   1
  -5  14  -5 37.4006 21.1407   2
  -5  14  -5-4.65556 17.5762   5
  -5 -14  -5 43.6213 18.7260   1
  -5  14  -6 114.873 29.5989   2
  -5  14  -6 39.4102 22.5939   5
  -5 -14  -6 57.4225 20.9006   1
  -5  14  -7 8.97260 18.4193   2
  -5 -14  -7 19.9768 20.3197   1
  -5  14  -8 86.5864 24.9500   2
  -5 -14  -8 69.3098 25.0192   1
  -5  14  -9 4.15906 19.9542   2
  -5  15   5 79.8427 17.1312   5
  -5  15   5 41.7033 21.8419   2
   5 -15  -5 55.5266 13.8790   3
  -5  15   4 11.4368 12.9161   5
  -5  15   4 4.37400 18.8610   2
   5 -15  -4 1.36515 9.95397   3
  -5  15   3 68.1850 18.7359   5
  -5  15   3 68.0885 25.6188   2
   5 -15  -3 64.0040 13.5939   3
   5 -15  -2 7.85678 9.14861   3
  -5  15   2 5.62657 14.9801   5
  -5  15   1 21.9408 16.1871   5
   5 -15  -1 14.0824 10.8254   3
  -5  15   0 77.7858 25.9019   2
  -5  15   0 70.0035 22.8297   5
  -5  15  -1 4.92281 18.5282   2
  -5  15  -1 3.75509 17.3098   5
  -5  15  -2 59.5026 24.7655   2
  -5  15  -2 99.1708 25.5441   5
  -5  15  -3 9.88233 19.7275   2
  -5  15  -3 4.13807 19.0773   5
  -5  15  -4 63.7645 27.3975   2
  -5  15  -4 17.7791 21.8500   5
  -5  15  -5 9.69927 20.9183   2
  -5 -15  -6 64.1757 22.6515   1
  -5 -15  -7 23.6584 19.1396   1
  -5  16   4 70.3203 18.7414   5
  -5  16   3 10.3755 13.6041   5
  -5  16   2 60.4672 20.6434   5
  -5  16   1-3.18430 16.1347   5
  -5  16   0 14.2195 17.4029   5
  -5  16  -1 23.4537 19.8624   5
   6   0 -16 1.92085 10.9935   3
   6   0 -15-1.89638 10.4042   3
   6   0 -14 37.4308 12.6822   3
   6   0 -13-3.69169 9.97905   3
   6   0 -12 420.969 38.6411   7
   6   0 -11-1.67166 8.75739   7
   6   0 -10 716.613 52.8176   8
  -6   0  10 716.288 62.0183   4
   6   0 -10 749.069 57.9618   7
  -6   0   9-2.16902 9.12916   4
   6   0  -9 4.66816 6.11769   8
   6   0  -9 7.44605 8.40976   7
   6   0  -8 1153.63 80.8628   8
  -6   0   8 1108.35 85.4544   4
   6   0  -8 1089.29 81.5207   7
   6   0  -7 9.98857 6.55348   8
  -6   0   7 1.77018 7.45955   4
  -6   0   6 879.449 67.1619   4
   6   0  -5-1.20481 4.94110   7
  -6   0   5 2.86624 5.39349   4
   6   0  -4 10.4186 6.28476   7
  -6   0   4 8.05803 6.21856   4
   6   0  -3 4.40011 4.52347   7
  -6   0   3 6.34508 5.60992   4
   6   0  -2 42.7952 8.26784   7
   6   0  -1-3.02907 4.65789   7
   6   0   0 1631.86 106.490   7
   6   0   0 1531.27 106.961   5
  -6   0   0 1453.26 106.738   6
   6   0   1-1.20030 5.05159   5
  -6   0  -1 8.46579 5.33817   6
   6   0   1-0.98819 4.83232   2
  -6   0  -2 1676.68 122.962   6
   6   0   2 1886.53 121.369   2
   6   0   2 1735.23 122.525   5
  -6   0  -3 1.44328 5.25969   6
   6   0   3 1.41325 6.09367   5
   6   0   3 0.97631 4.94720   2
   6   0   4 1858.87 118.215   5
  -6   0  -4 1746.02 113.168   5
  -6   0  -4 1592.85 116.141   6
   6   0   4 1679.51 112.017   2
   6   0   4 1551.67 105.628   3
   6   0   4 1683.54 105.573   3
  -6   0  -5 4.61843 5.43324   5
   6   0   5-1.01400 5.95938   2
   6   0   5 4.38634 10.1096   5
   6   0   6 259.294 33.0577   5
  -6   0  -6 163.757 18.7625   5
  -6   0  -7-2.57993 6.53779   5
  -6   0  -8 16.3002 7.11900   5
   6   0   8 1.04156 3.10687   2
   6   0   9-2.19302 7.00426   2
   6   0   9 13.0256 9.36539   8
  -6   0  -9 8.69440 8.18629   5
   6   0  10 64.2960 14.5192   8
  -6   0 -10 56.2373 12.6476   5
   6   0  11-2.45030 10.3197   8
  -6   0 -11 17.4901 9.70534   5
  -6   0 -12 409.153 37.5417   5
   6   0  12 409.867 42.8187   8
   6   0  13 2.72924 13.8290   8
   6   0  14 262.760 34.3057   8
   6   1 -16 217.177 26.4984   3
   6  -1 -16 206.088 25.9503   3
   6  -1 -15-1.82869 9.73271   3
   6   1 -15 4.02014 11.1883   3
   6   1 -14 303.313 30.5242   3
   6  -1 -14 237.311 27.6976   3
   6  -1 -13 7.29194 10.7164   7
   6  -1 -13 6.89206 9.59641   3
   6   1 -13 1.97911 10.0330   3
   6  -1 -12 366.495 34.7475   7
   6   1 -11 27.9417 11.8064   7
   6  -1 -11 14.6319 10.2302   7
  -6   1  10 43.4224 13.3027   4
   6  -1 -10 43.0702 11.8298   3
   6  -1 -10 27.8413 10.0597   7
   6   1 -10 53.7852 11.6287   7
   6   1 -10 31.8475 8.26123   8
   6   1  -9 30.8540 8.06569   8
  -6   1   9 10.4655 10.4704   4
   6  -1  -9 16.2462 8.16664   3
   6   1  -9 21.9415 10.5797   7
   6  -1  -9 8.90396 7.96396   7
   6  -1  -9 10.3461 6.51909   8
   6  -1  -8 167.924 20.1611   8
  -6   1   8 207.856 23.6959   4
   6  -1  -8 190.264 20.3642   3
   6  -1  -8 177.117 20.3751   7
   6  -1  -7 7.67544 6.52632   3
  -6   1   7 22.2341 9.41386   4
   6  -1  -7 12.1866 7.75580   8
   6  -1  -7 10.7059 7.16329   7
   6   1  -6 1303.01 92.4504   7
   6  -1  -6 1331.54 94.1120   8
  -6   1   6 1249.01 93.6211   4
  -6   1   5 16.7804 6.64948   4
   6  -1  -5 16.6754 8.12637   8
   6  -1  -5 13.5288 7.19880   7
   6   1  -5 13.7321 6.39907   7
  -6   1   4 2116.06 147.307   4
   6  -1  -4 2348.71 150.025   8
   6   1  -4 1939.57 145.900   7
   6  -1  -4 2273.30 147.144   7
   6   1  -3 3.25158 4.56654   7
   6  -1  -3 6.82018 5.02173   7
  -6   1   3 1.24510 4.83575   4
   6   1  -2 2288.63 158.481   7
   6  -1  -2 2425.79 159.519   7
   6   1  -1 1.95469 4.11414   7
  -6  -1   0 371.664 30.3126   6
   6  -1   0 334.551 26.4439   3
   6   1   0 362.863 29.2076   5
   6   1   0 351.554 28.7532   7
   6  -1   1 34.3872 4.89090   3
  -6  -1  -1 27.5519 7.36632   6
   6   1   1 33.8715 6.54579   7
   6   1   1 23.3225 7.04815   2
   6   1   1 18.8415 6.57411   5
   6  -1   2 90.1114 12.9687   2
   6   1   2 107.258 11.7063   7
  -6  -1  -2 101.627 13.2884   6
   6   1   2 90.7410 11.7691   2
  -6   1  -2 89.7024 12.5000   5
   6   1   2 112.697 13.4469   5
   6  -1   2 98.9235 8.30402   3
  -6   1  -3 66.4826 10.8206   5
   6   1   3 77.1356 11.8217   5
   6  -1   3 78.4442 6.18068   3
  -6  -1  -3 51.0714 10.5328   6
   6   1   3 68.3226 9.07290   7
   6   1   3 52.3417 9.25040   2
   6  -1   3 66.4058 10.5162   2
  -6  -1  -4 304.625 31.4272   6
  -6   1  -4 331.373 30.1621   5
   6   1   4 392.218 32.5033   5
   6  -1   4 351.556 30.0210   2
   6   1   4 330.928 27.8356   2
   6   1   4 341.871 23.4465   3
   6   1   4 402.816 28.0969   7
   6   1   5 33.0742 7.56013   2
   6  -1   5 39.9497 8.67067   2
  -6   1  -5 35.2213 8.68165   5
   6   1   5 51.2084 12.7452   5
   6  -1   5 39.4285 10.7522   8
   6   1   5 36.6140 3.01440   3
   6   1   5 32.0555 6.38515   7
  -6  -1  -6 1652.28 119.215   5
  -6   1  -6 1570.75 121.738   5
   6  -1   6 1718.80 120.769   2
   6  -1   6 1726.97 126.269   8
   6  -1   7 17.2149 8.63357   8
  -6  -1  -7 13.5411 6.18188   5
  -6   1  -7 10.9376 7.25442   5
   6   1   8 1185.94 88.3865   2
   6   1   8 1332.23 86.4816   7
  -6  -1  -8 1281.46 90.1113   5
  -6   1  -8 1294.70 94.2838   5
   6  -1   8 1321.29 98.1110   8
   6   1   9 10.5831 4.09020   7
   6  -1   9 14.5046 10.1907   8
  -6   1  -9 10.8841 8.72491   5
  -6  -1  -9 15.8092 7.23278   5
   6   1   9 2.65599 6.15278   2
  -6  -1  -9 9.62336 11.5586   1
  -6  -1 -10 688.901 66.0742   1
   6  -1  10 841.056 68.8208   8
  -6  -1 -10 830.401 59.7837   5
  -6   1 -10 817.083 64.3484   5
  -6   1 -11 36.7693 12.8153   5
  -6  -1 -11 25.1257 8.37487   5
   6   1  11 17.9591 11.6421   8
   6  -1  11 10.7913 11.7050   8
  -6  -1 -11 7.79982 12.3004   1
  -6   1 -12 51.0466 14.0555   5
  -6  -1 -12 26.8813 14.2699   1
   6   1  12 35.8362 12.9236   8
   6  -1  12 28.3536 15.2664   8
  -6  -1 -13 16.6048 14.9657   1
   6  -1  13-5.85470 13.5019   8
   6   1  13 20.1520 12.9905   8
  -6  -1 -14-5.67240 15.3288   1
   6  -1  14 5.88508 13.5626   8
   6   1  14 2.63583 16.2616   8
  -6  -1 -15-8.69986 15.1912   1
   6  -1  15 5.72303 13.7279   8
  -6  -1 -16 55.9844 20.1234   1
   6   2 -16 8.50341 12.8329   3
   6  -2 -16 16.8160 12.7027   3
   6   2 -15 36.8688 15.2992   3
   6  -2 -15 33.8337 12.0591   3
   6  -2 -14 3.72099 10.7903   7
   6  -2 -14-3.45538 9.61644   3
   6  -2 -13 81.2275 15.9416   7
   6  -2 -13 74.5363 15.1342   3
   6  -2 -12 464.702 41.0608   7
   6  -2 -11 46.5835 11.8378   7
  -6  -2  11 35.1808 14.4438   4
  -6   2  11 45.5915 15.3952   4
   6  -2 -10 977.959 68.4132   7
   6  -2 -10 792.509 65.6860   3
  -6  -2  10 934.482 74.0541   4
  -6   2  10 872.497 71.5561   4
   6  -2  -9 3.96872 7.25894   8
   6  -2  -9-1.32502 7.16286   3
   6  -2  -9 10.4960 7.46628   7
   6   2  -9 3.24547 8.08005   7
  -6  -2   9 2.30514 9.45456   4
  -6   2   9-4.03323 9.67553   4
   6  -2  -8 1303.05 87.3255   7
  -6  -2   8 1202.48 90.8421   4
  -6   2   8 1181.35 89.3194   4
   6  -2  -8 1252.05 88.6455   8
   6  -2  -8 1069.48 84.5917   3
   6  -2  -7 73.3493 11.2345   3
  -6  -2   7 68.9190 13.9275   4
  -6   2   7 83.8309 13.9595   4
   6  -2  -7 83.3088 12.9247   7
   6  -2  -7 81.6360 15.0389   8
   6   2  -6 614.701 45.8521   7
   6  -2  -6 574.148 48.7682   8
   6  -2  -6 519.315 43.1895   3
  -6   2   6 579.394 46.5485   4
  -6  -2   6 577.636 47.6867   4
   6   2  -5 164.513 18.1115   7
  -6  -2   5 164.857 19.5848   4
  -6   2   5 174.125 19.4519   4
   6  -2  -5 166.191 21.0859   8
   6  -2  -5 167.560 17.1702   3
   6  -2  -4 2.54729 4.58982   3
  -6   2   4 5.12937 5.25952   4
   6   2  -4-1.17396 4.68672   7
   6  -2  -4-1.22658 4.89671   7
   6  -2  -4 1.86324 6.55964   8
  -6   2   3 261.172 24.0353   4
   6  -2  -3 271.002 27.3752   8
   6  -2  -3 223.761 20.8074   3
   6   2  -3 260.931 23.3212   7
   6  -2  -2 41.0212 10.6753   8
   6   2  -2 32.8980 7.81518   7
   6   2  -2 46.5851 9.28664   1
   6  -2  -2 38.4477 6.29983   3
   6  -2  -1 263.575 21.3131   3
   6   2  -1 299.049 24.4967   7
   6  -2  -1 304.349 29.4860   8
   6   2  -1 251.127 24.5938   1
   6   2   0 1345.64 89.0472   1
   6  -2   0 1261.02 92.7575   8
   6   2   0 1228.79 86.2227   7
   6   2   0 1170.08 86.2218   5
  -6  -2   0 1320.81 88.2170   6
  -6   2   0 1178.57 87.3373   6
   6  -2   0 1240.63 83.0651   3
  -6  -2  -1 87.7252 12.2496   6
  -6   2  -1 90.3733 12.3046   6
   6  -2   1 87.6176 14.9382   8
  -6   2  -1 79.1739 11.8997   5
   6   2   1 103.801 11.7258   5
   6  -2   1 86.4077 8.03300   3
   6   2   1 82.7170 10.5215   7
   6   2   2 1497.66 91.8845   7
   6  -2   2 1429.79 99.8304   8
   6  -2   2 1304.74 87.4798   3
  -6  -2  -2 1213.03 93.7844   6
  -6   2  -2 1285.90 94.5255   6
   6   2   2 1418.47 93.1992   5
  -6   2  -2 1236.49 94.3594   5
  -6  -2  -3 58.7133 10.8245   6
  -6   2  -3 65.6099 11.7031   6
  -6   2  -3 68.9883 11.3945   5
   6  -2   3 68.3082 14.3576   8
   6   2   3 77.1706 6.70469   3
   6  -2   3 71.2183 5.70054   3
   6   2   3 57.8491 8.54780   7
   6  -2   4 1574.18 111.172   2
   6   2   4 1485.53 107.467   2
  -6   2  -4 1419.34 112.199   6
  -6  -2  -4 1625.99 113.159   6
  -6   2  -4 1615.21 112.437   5
   6   2   4 1709.58 107.064   7
   6   2   4 1587.63 103.673   3
  -6   2  -5 55.8986 11.8716   5
   6   2   5 66.5801 8.53713   7
   6   2   5 80.4980 6.16607   3
   6  -2   5 48.9747 11.9371   2
   6   2   5 56.3358 9.31482   2
  -6  -2  -6 301.423 36.4880   1
   6  -2   6 349.568 34.0724   2
   6  -2   6 344.761 38.3347   8
   6   2   6 443.019 27.2629   3
  -6   2  -6 343.545 35.2147   5
   6   2   6 375.822 29.0621   7
   6   2   7 156.254 13.4366   7
   6  -2   7 171.338 23.6059   8
   6  -2   7 187.932 21.4456   2
  -6   2  -7 169.061 22.1056   5
  -6  -2  -7 170.978 23.1813   1
  -6   2  -8 4.11228 9.27902   5
   6  -2   8 2.57709 9.99839   8
   6   2   8 5.49920 2.96286   7
   6   2   8 0.81445 2.30504   2
  -6   2  -9 179.934 24.1732   5
   6  -2   9 181.305 26.3100   8
   6   2   9 173.002 16.7136   2
  -6  -2 -10 112.031 20.7309   1
   6  -2  10 51.1936 16.8808   8
  -6   2 -10 93.0749 18.5341   5
  -6  -2 -11 59.6024 16.7572   1
   6  -2  11 38.5669 15.0356   8
  -6   2 -11 36.7490 14.4853   5
  -6  -2 -12 302.986 36.2592   1
  -6   2 -12 307.778 34.6566   5
   6  -2  12 264.389 35.7998   8
   6   2  12 322.808 34.4998   8
   6  -2  13-6.12160 12.2176   8
  -6  -2 -13 8.67833 12.7656   1
  -6   2 -13-2.65760 11.7277   5
   6   2  13 2.34022 10.7864   8
  -6  -2 -14 190.053 31.4899   1
   6  -2  14 217.800 31.8528   8
   6   2  14 300.994 33.1587   8
  -6  -2 -15-3.02944 15.3583   1
   6  -2  15-11.4847 14.5570   8
  -6  -2 -16 194.163 30.6330   1
   6  -3 -16 245.239 29.0683   3
   6   3 -16 263.707 32.1709   3
   6  -3 -15 5.54269 10.7213   3
   6  -3 -14 171.083 21.5400   3
   6  -3 -14 142.316 21.4687   7
   6  -3 -13 70.8790 14.5369   7
  -6  -3  12 52.9882 18.1229   4
   6  -3 -12 84.8531 14.9995   7
   6  -3 -11 76.8686 14.4866   3
  -6  -3  11 82.7085 20.4076   4
  -6   3  11 67.0704 16.7087   4
   6  -3 -10-1.35830 7.66949   3
   6  -3 -10 1.57084 7.96060   7
  -6  -3  10 2.56104 10.7770   4
  -6   3  10 12.7171 9.56499   4
   6  -3  -9 381.421 32.7332   7
   6  -3  -9 324.579 30.5689   3
  -6   3   9 333.658 34.2046   4
  -6  -3   9 379.734 37.4392   4
   6  -3  -8 67.5429 14.5145   8
   6  -3  -8 75.0155 11.5218   3
   6  -3  -8 75.2631 12.8153   7
  -6  -3   8 87.1730 15.8553   4
  -6   3   8 71.8748 14.1464   4
   6  -3  -7 196.953 22.1706   7
   6   3  -7 221.038 23.5154   7
   6  -3  -7 222.304 26.3511   8
   6  -3  -7 214.702 20.7493   3
  -6  -3   7 216.444 24.4351   4
  -6   3   7 225.100 23.9473   4
   6   3  -6 1098.81 83.0469   7
   6  -3  -6 1320.92 84.4943   7
  -6  -3   6 1198.97 85.8298   4
  -6   3   6 1090.94 82.9347   4
   6  -3  -6 1108.60 88.1819   8
   6  -3  -6 1092.21 80.2920   3
   6  -3  -5 57.3884 9.11472   3
  -6  -3   5 49.3024 11.1383   4
  -6   3   5 58.1427 10.5651   4
   6  -3  -5 62.2741 14.9865   8
   6   3  -5 51.5911 10.6481   7
  -6  -3   4 1236.10 88.9128   4
  -6   3   4 1156.99 87.0172   4
   6  -3  -4 1175.89 93.6315   8
   6  -3  -4 1150.57 83.8273   3
   6   3  -4 1447.74 88.6179   7
  -6   3   3 8.37304 5.47039   4
   6  -3  -3 11.5466 9.26100   8
   6  -3  -3 16.6568 4.79243   3
   6   3  -3 17.2896 6.29323   7
  -6   3   2 1302.76 92.4821   2
   6  -3  -2 1301.43 97.5496   8
   6   3  -2 1323.85 89.9467   1
   6  -3  -2 1237.20 86.1682   3
   6   3  -2 1260.19 89.3536   7
   6   3  -1 111.119 13.6712   7
  -6   3   1 123.300 16.1263   2
   6  -3  -1 165.090 21.1208   8
   6   3  -1 130.863 15.3759   1
  -6   3   1 133.810 15.3945   5
   6  -3  -1 119.402 11.4799   3
   6   3   0 342.852 28.5456   7
  -6   3   0 328.212 31.5724   2
   6  -3   0 333.648 35.3062   8
   6   3   0 364.756 30.9511   1
   6  -3   0 356.043 25.9278   3
  -6   3   0 350.706 30.6669   5
  -6   3  -1 492.859 40.3429   6
  -6  -3  -1 487.733 40.0282   6
  -6   3  -1 471.791 41.7783   2
   6  -3   1 553.791 47.6456   8
   6  -3   1 503.022 34.9915   3
   6   3   1 535.150 38.6834   7
   6   3   1 514.574 38.6764   5
  -6   3  -1 501.513 41.4848   5
   6   3   2 3.15764 3.93480   7
  -6  -3  -2 1.24342 4.82733   6
  -6   3  -2 1.30333 4.59218   6
   6  -3   2 2.99620 2.25708   3
   6  -3   2 2.39313 7.80197   8
  -6   3  -2 2.93647 5.52887   5
  -6   3  -2 10.2890 6.63498   2
  -6   3  -3 401.269 36.6983   5
  -6   3  -3 396.449 36.0923   2
   6  -3   3 384.112 40.5278   8
   6  -3   3 428.790 28.2581   3
   6   3   3 416.063 29.2931   3
  -6  -3  -3 406.724 35.5445   6
  -6   3  -3 368.549 35.1416   6
   6   3   3 433.262 31.9392   7
   6   3   4 295.772 23.2975   7
  -6   3  -4 344.701 29.0468   2
   6   3   4 310.867 21.2531   3
  -6   3  -4 272.071 28.6462   6
  -6   3  -4 273.246 28.7538   5
  -6  -3  -4 234.034 27.2215   6
   6  -3   5 101.669 17.8930   8
  -6   3  -5 108.753 13.6670   2
  -6  -3  -5 61.1745 13.8341   1
  -6   3  -5 73.9508 13.6226   5
   6   3   5 85.4638 5.81558   3
   6   3   5 104.792 8.39655   7
  -6   3  -6 1090.95 82.4891   5
   6   3   6 718.551 72.8374   2
   6  -3   6 945.315 84.2961   8
  -6  -3  -6 897.295 81.4420   1
   6   3   6 1133.59 70.4547   3
   6   3   6 1175.04 72.0720   7
   6  -3   7 2.80953 10.2672   8
  -6  -3  -7 6.99058 9.07281   1
   6   3   7 13.5302 3.13590   3
  -6   3  -7 13.1388 9.69485   5
   6  -3   8 540.642 54.0355   8
  -6   3  -8 676.375 53.6524   5
  -6  -3  -8 531.389 51.9308   1
  -6   3  -9 42.0387 14.1016   5
   6  -3   9 72.6714 17.5980   8
   6   3   9 44.6611 7.99814   2
  -6   3 -10 564.982 50.3135   5
   6  -3  10 460.401 50.2058   8
   6  -3  11 44.2921 16.2351   8
  -6  -3 -11 50.6418 18.1368   1
  -6   3 -11 30.3272 14.2044   5
   6  -3  12 98.0555 22.0561   8
  -6  -3 -12 72.9727 19.2757   1
  -6   3 -12 40.4850 16.1667   5
   6   3  13 55.9391 15.4660   8
   6  -3  13 80.7145 20.5585   8
  -6  -3 -13 81.5440 20.6142   1
  -6   3 -13 21.0761 17.6091   5
   6  -3  14 6.03850 15.5590   8
   6   3  14-6.96494 13.8149   8
  -6  -3 -14 15.5474 15.4806   1
  -6  -3 -15 15.9177 15.8983   1
   6  -3  15 23.0843 16.3368   8
   6  -4 -16 11.1963 13.3900   3
   6  -4 -15 153.993 22.2847   7
   6  -4 -15 167.795 23.3447   3
   6  -4 -14 26.7711 12.6448   7
   6  -4 -14 42.3998 13.4770   3
  -6  -4  13 47.1085 19.5435   4
   6  -4 -13 97.6327 17.0728   7
   6  -4 -12 304.712 29.0742   7
  -6   4  12 263.130 31.7681   4
  -6  -4  12 211.262 31.2521   4
   6  -4 -11 57.2697 12.0658   3
   6  -4 -11 34.4890 11.9304   7
  -6  -4  11 25.1606 14.1403   4
  -6   4  11 33.3029 13.6065   4
   6  -4 -10 580.000 44.2667   7
   6  -4 -10 503.766 41.6522   3
  -6  -4  10 481.522 48.1080   4
  -6   4  10 455.974 44.4186   4
   6  -4  -9 8.81193 6.73131   3
   6  -4  -9 6.11963 8.41819   7
  -6  -4   9 16.6688 11.2207   4
  -6   4   9 13.0091 9.43837   4
   6  -4  -8 492.579 42.4015   3
   6  -4  -8 609.743 45.7484   7
  -6  -4   8 584.697 49.0593   4
  -6   4   8 519.819 45.5783   4
   6  -4  -7 295.705 28.2592   7
   6  -4  -7 333.450 33.4989   8
   6  -4  -7 268.985 25.4522   3
  -6  -4   7 374.943 32.5574   4
  -6   4   7 261.892 27.5549   4
   6  -4  -6 241.776 23.7418   7
  -6  -4   6 213.117 24.1300   4
  -6   4   6 202.035 22.3630   4
   6  -4  -6 227.256 20.9068   3
   6  -4  -6 254.846 29.2851   8
  -6  -4   5 580.571 49.2905   4
  -6   4   5 616.724 48.0113   4
   6  -4  -5 538.610 54.4142   8
   6  -4  -5 614.131 45.6668   3
  -6   4   5 688.590 50.4277   2
   6  -4  -4 15.7397 5.95846   3
  -6  -4   4 2.89768 6.41475   4
  -6   4   4 9.88212 6.38676   4
   6  -4  -4 10.7787 11.3499   8
   6   4  -4 1.34286 6.58546   7
   6  -4  -3 659.793 64.5858   8
   6  -4  -3 824.799 55.3807   3
   6   4  -3 734.089 57.5641   7
  -6   4   2 139.427 17.6520   2
   6  -4  -2 121.890 21.2666   8
   6   4  -2 105.147 13.8951   1
   6  -4  -2 117.271 11.8279   3
   6   4  -2 121.916 14.3340   7
  -6   4   1 140.034 17.4199   2
   6  -4  -1 142.274 21.9743   8
   6   4  -1 115.831 15.1149   1
   6  -4  -1 117.502 11.3202   3
   6   4  -1 123.981 14.7160   7
  -6   4   0 730.522 55.9220   2
   6  -4   0 710.637 62.2486   8
   6  -4   0 641.778 47.5906   3
  -6   4   0 708.205 54.4440   5
   6   4   0 797.181 52.4442   7
   6   4   1 39.1293 7.75004   7
  -6  -4  -1 23.9290 6.76264   6
  -6   4  -1 28.1294 7.61101   6
   6   4   1 30.2112 6.97968   5
  -6   4  -1 38.6357 9.59171   5
   6  -4   1 36.6351 13.1118   8
   6  -4   1 23.9360 4.23119   3
  -6   4  -1 21.5488 9.13611   2
  -6   4  -2 597.134 50.4542   5
   6   4   2 675.682 46.2114   7
  -6   4  -2 551.630 49.6808   2
   6  -4   2 620.991 41.9947   3
   6   4   2 651.029 43.0910   3
  -6   4  -2 530.283 47.3407   6
  -6  -4  -2 596.507 47.7875   6
   6  -4   2 622.116 57.0914   8
  -6  -4  -3 43.9989 9.41440   6
  -6   4  -3 43.0683 9.78243   6
  -6   4  -3 56.2939 12.9451   5
  -6   4  -3 37.1248 10.5251   2
   6  -4   3 50.4470 4.98694   3
   6   4   3 48.9305 6.04600   3
   6   4   3 54.3065 8.34401   7
   6  -4   3 52.1787 14.5184   8
  -6   4  -4 865.840 66.2506   2
  -6  -4  -4 760.626 64.0633   6
  -6   4  -4 786.551 65.0744   6
  -6   4  -4 811.896 67.5084   5
   6  -4   4 855.513 56.1107   3
   6   4   4 888.388 57.4706   3
  -6  -4  -4 829.096 67.7801   1
  -6   4  -5 168.141 22.2317   5
   6   4   5 156.339 17.1499   5
  -6  -4  -5 174.893 22.6528   1
  -6   4  -5 165.462 20.5127   2
   6  -4   5 153.908 24.9772   8
   6   4   5 183.824 13.7562   3
  -6   4  -6 117.421 17.2045   2
  -6   4  -6 119.309 19.1288   5
   6   4   6 102.819 15.7333   5
  -6  -4  -6 103.988 19.7229   1
   6  -4   6 145.512 23.3982   8
   6   4   6 149.770 11.1958   3
  -6   4  -7 403.192 37.2409   2
   6  -4   7 385.521 44.3811   8
  -6   4  -7 379.254 41.3673   5
   6   4   7 465.268 30.5159   3
  -6  -4  -7 384.264 41.5908   1
   6  -4   8 16.0810 12.1414   8
  -6   4  -8 5.15021 11.1436   5
  -6   4  -8 20.2998 8.24086   2
  -6  -4  -8 17.7179 11.9452   1
   6  -4   9 346.514 40.1268   8
  -6   4  -9 303.956 36.8489   5
  -6  -4  -9 349.071 38.1505   1
  -6   4 -10 92.3612 21.3809   5
   6  -4  10 85.4236 21.7342   8
  -6   4 -11 138.010 25.5190   5
   6  -4  11 104.381 23.0208   8
  -6   4 -12 220.211 34.4275   5
  -6  -4 -12 272.861 35.1903   1
   6  -4  12 304.491 37.7998   8
  -6  -4 -13 37.6911 17.2737   1
  -6   4 -13 6.76402 15.9558   5
   6  -4  13 15.7999 13.9975   8
  -6  -4 -14 94.0288 22.5904   1
  -6   4 -14 51.7386 21.4056   5
   6  -4  14 97.2582 22.7383   8
  -6  -4 -15 23.3443 17.9093   1
   6  -4  15 51.1547 18.0950   8
  -6  -5  16 72.7831 23.7181   4
   6  -5 -16 94.4607 18.7826   7
   6  -5 -15-10.3240 12.0064   3
  -6  -5  15 10.1606 15.9328   4
   6  -5 -15 7.32151 12.0551   7
   6  -5 -14 53.4200 13.4629   3
  -6  -5  14 42.5748 20.1821   4
  -6   5  14 10.7906 16.3168   4
   6  -5 -14 64.3836 14.3844   7
  -6  -5  13 66.0484 21.5401   4
  -6   5  13 45.1620 17.3665   4
   6  -5 -13 78.8896 15.1953   7
  -6  -5  12 53.8135 18.8449   4
  -6   5  12 57.8915 17.4037   4
   6  -5 -12 108.175 17.5301   7
   6  -5 -11 164.868 20.8172   7
  -6  -5  11 138.033 25.1012   4
  -6   5  11 176.668 23.1167   4
   6  -5 -11 185.162 21.6595   3
   6  -5 -10 7.44425 8.86040   3
   6  -5 -10 1.60914 8.82890   7
  -6  -5  10-2.61597 11.2796   4
  -6   5  10 1.95254 9.18625   4
   6  -5  -9 423.211 36.3086   3
  -6  -5   9 443.005 41.6222   4
  -6   5   9 365.948 36.5421   4
   6  -5  -9 409.561 36.4076   7
   6   5  -8 41.8422 7.60369   1
   6  -5  -8 50.8936 10.8168   3
   6  -5  -8 55.4821 12.5821   7
  -6  -5   8 40.6742 12.9321   4
  -6   5   8 50.9911 11.0188   4
   6  -5  -7 489.877 36.9645   3
  -6  -5   7 463.049 41.1446   4
  -6   5   7 404.630 36.9819   4
   6   5  -7 393.924 33.1088   1
   6  -5  -7 489.118 39.1975   7
  -6   5   7 467.393 38.9653   2
  -6  -5   6 501.194 42.1079   4
  -6   5   6 440.606 38.9291   4
   6   5  -6 453.213 35.9056   1
  -6   5   6 499.228 41.3212   2
   6  -5  -6 513.507 38.4026   3
   6  -5  -6 506.808 47.4795   8
  -6  -5   5 964.113 67.8602   4
  -6   5   5 839.070 64.5981   4
   6   5  -5 929.703 62.2939   1
  -6   5   5 812.457 66.4813   2
   6  -5  -5 885.251 62.7201   3
   6  -5  -5 725.475 72.2428   8
  -6   5   4 548.482 47.2085   2
   6  -5  -4 543.633 41.9576   3
  -6   5   4 580.636 45.2548   4
  -6  -5   4 639.411 47.5129   4
   6  -5  -4 574.805 55.2120   8
   6  -5  -3 3.05841 9.97017   8
   6  -5  -3 3.41917 4.22445   3
   6  -5  -2 887.724 69.4989   8
   6  -5  -2 699.090 51.8009   3
  -6   5   2 794.260 59.9480   2
   6  -5  -1 558.276 52.9727   8
   6  -5  -1 512.678 37.4409   3
  -6   5   1 535.063 45.5480   2
   6  -5   0 294.561 35.4128   8
   6  -5   0 298.328 21.4969   3
  -6   5   0 213.435 26.5692   5
  -6   5   0 277.776 29.0094   2
  -6   5  -1 620.515 57.2108   2
   6  -5   1 662.267 64.7090   8
   6  -5   1 724.892 49.0962   3
  -6  -5  -1 725.551 53.7642   6
  -6   5  -1 741.419 54.0841   6
  -6   5  -1 741.213 57.6549   5
  -6   5  -2-1.94135 7.74938   2
  -6  -5  -2-1.20750 4.82031   6
  -6   5  -2 1.27277 5.22002   6
  -6   5  -2 1.90078 6.69158   5
   6   5   2 3.22015 4.48133   5
   6  -5   2 2.92283 2.99730   3
   6   5   2-0.49542 3.84416   3
   6  -5   2-3.25587 10.6115   8
   6  -5   3 1041.04 93.1732   8
  -6   5  -3 1080.53 85.9221   2
   6  -5   3 1190.43 75.7930   3
   6   5   3 1150.14 76.7996   3
  -6  -5  -3 1080.35 85.3086   1
  -6   5  -3 1149.71 83.1805   6
  -6  -5  -3 1034.47 81.6644   6
  -6   5  -3 1153.00 87.6842   5
  -6   5  -4 246.447 24.3065   2
  -6  -5  -4 278.319 25.6974   1
   6   5   4 307.423 14.0991   3
   6  -5   4 278.669 11.9486   3
  -6   5  -4 264.657 25.6713   5
  -6  -5  -4 264.144 21.3029   6
  -6   5  -4 216.230 20.9555   6
  -6   5  -5 419.038 41.9561   2
   6   5   5 562.277 34.3167   3
  -6  -5  -5 446.487 43.7863   1
  -6  -5  -5 375.525 39.6135   6
  -6   5  -5 407.158 43.7629   5
   6   5   5 496.253 37.0495   5
  -6   5  -5 420.708 41.2385   6
   6  -5   5 521.979 51.2016   8
   6   5   6 873.157 57.5338   5
  -6   5  -6 573.539 58.9698   2
  -6  -5  -6 681.617 63.1995   1
  -6   5  -6 717.234 64.1408   5
   6  -5   6 663.440 67.5268   8
   6   5   6 816.634 52.1813   3
  -6   5  -7 49.0012 14.3645   5
   6  -5   7 34.0694 15.7977   8
  -6   5  -7 20.2052 9.62181   2
  -6  -5  -7 17.3232 12.2210   1
   6  -5   8 180.426 29.8597   8
  -6   5  -8 208.150 23.3935   2
  -6  -5  -8 207.352 27.9879   1
  -6   5  -8 217.988 29.7972   5
  -6   5  -9 56.6559 18.2411   5
   6  -5   9 84.8979 21.1133   8
  -6   5  -9 63.9018 12.7129   2
  -6  -5  -9 58.2077 16.1821   1
  -6   5 -10 229.661 23.2627   2
   6  -5  10 196.894 30.7960   8
  -6   5 -10 181.084 31.6197   5
  -6  -5 -10 239.015 31.4755   1
  -6   5 -11 89.0333 22.0260   5
   6  -5  11 67.2435 20.6178   8
  -6   5 -12-3.72186 16.4479   5
   6  -5  12 39.7245 18.1820   8
  -6   5 -13 72.6168 27.3941   5
   6  -5  13 149.916 26.8078   8
  -6   5 -14 7.79523 16.4031   5
  -6  -5 -14 3.39528 15.9758   1
   6  -6 -15 177.003 21.9432   3
  -6  -6  15 133.878 27.8316   4
  -6   6  15 102.362 26.5198   4
   6  -6 -15 182.786 23.0137   7
   6  -6 -14 11.5808 11.2267   3
  -6  -6  14-6.50243 16.4742   4
  -6   6  14 15.5151 13.3274   4
   6  -6 -14-1.74245 11.1212   7
  -6  -6  13 84.5310 22.5083   4
  -6   6  13 88.8217 21.0871   4
   6  -6 -13 135.886 19.3606   7
  -6  -6  12 98.4994 22.7445   4
  -6   6  12 144.079 22.0300   4
   6  -6 -12 135.855 19.3423   7
   6  -6 -11 83.1377 14.1015   3
  -6  -6  11 53.2350 18.0085   4
  -6   6  11 71.3301 16.3754   4
   6  -6 -11 98.9050 16.2574   7
   6  -6 -10 216.440 22.9853   7
  -6  -6  10 162.579 25.4168   4
  -6   6  10 128.083 21.0874   4
   6  -6 -10 180.741 19.5775   3
   6  -6  -9 29.0311 8.97128   3
   6  -6  -9 34.2692 11.6650   7
  -6  -6   9 37.5294 13.7524   4
  -6   6   9 28.4941 10.5356   4
  -6  -6   8 138.364 20.3868   4
  -6   6   8 103.590 15.8572   4
   6  -6  -8 151.145 18.8877   7
  -6   6   8 148.906 18.7263   2
   6  -6  -8 128.391 15.7580   3
   6  -6  -7 538.546 41.2710   3
  -6  -6   7 540.037 46.1637   4
  -6   6   7 468.499 42.2595   4
  -6   6   7 594.901 46.1151   2
  -6  -6   6 154.825 19.2995   4
  -6   6   6 115.001 15.5193   4
   6  -6  -6 142.910 15.2093   3
  -6   6   6 128.016 17.7796   2
   6  -6  -5 680.538 49.0625   3
  -6   6   5 684.315 54.7120   2
  -6  -6   5 653.859 53.0522   4
  -6   6   5 638.337 50.8559   4
   6  -6  -4 9.48869 12.2816   8
   6  -6  -4 5.53730 5.07734   3
  -6   6   4 18.4382 9.51732   2
   6  -6  -3 657.657 50.0233   3
  -6   6   3 745.650 55.8970   5
  -6   6   2 68.4962 12.3697   5
   6  -6  -2 47.8266 16.4927   8
  -6   6   2 51.8633 12.7154   2
   6  -6  -2 57.4596 7.92405   3
   6  -6  -1 314.608 38.4394   8
   6  -6  -1 279.134 22.6070   3
  -6   6   1 309.854 31.2460   2
   6  -6   0 514.237 50.3927   8
   6  -6   0 407.880 31.2728   3
  -6   6   0 478.177 42.0987   2
  -6   6  -1 197.391 25.1455   5
   6  -6   1 256.959 34.7166   8
  -6   6  -1 283.497 29.5645   2
  -6   6  -1 220.606 22.0442   6
  -6   6  -1 227.409 20.5571   3
   6  -6   1 262.947 19.1283   3
  -6   6  -2 90.5695 16.2036   5
  -6   6  -2 100.577 17.6086   2
  -6  -6  -2 65.5341 9.60374   7
   6  -6   2 67.0452 19.7903   8
  -6  -6  -2 52.0839 13.6143   1
   6  -6   2 103.254 8.87094   3
  -6  -6  -2 87.9065 12.0979   6
  -6   6  -2 73.2557 11.7091   6
  -6   6  -3 146.556 21.4647   2
  -6   6  -3 125.734 19.9764   5
   6  -6   3 127.340 25.2500   8
  -6   6  -3 133.032 16.2029   6
  -6  -6  -3 133.873 15.8142   6
  -6  -6  -3 134.805 19.6501   1
   6  -6   3 123.530 11.1130   3
  -6   6  -3 148.139 13.4169   3
  -6   6  -4 124.942 9.59549   3
  -6  -6  -4 111.345 13.4459   6
  -6   6  -4 98.7631 13.5612   6
  -6   6  -4 115.975 17.8729   5
  -6  -6  -4 123.293 17.7011   1
  -6   6  -4 95.5324 17.0405   2
   6  -6   4 131.892 7.47481   3
  -6   6  -5 598.436 52.5305   2
  -6  -6  -5 595.215 52.2561   1
  -6   6  -5 610.963 54.1310   5
  -6  -6  -5 536.146 47.3126   6
  -6   6  -5 669.305 50.5256   6
   6   6   5 674.973 43.8770   5
  -6   6  -5 525.211 40.8564   3
   6  -6   5 588.129 58.4660   8
  -6   6  -6 165.069 23.0788   2
  -6   6  -6 126.290 23.0751   5
   6   6   6 192.496 17.2822   5
  -6  -6  -6 146.858 19.9069   6
  -6  -6  -6 155.652 23.2085   1
   6  -6   6 139.607 26.1852   8
  -6   6  -7 482.936 46.9267   2
  -6   6  -7 551.728 53.1573   5
  -6  -6  -7 509.109 50.1089   1
   6  -6   7 642.679 58.0617   8
  -6   6  -8 72.7467 18.5443   5
   6  -6   8 21.3946 14.0168   8
  -6  -6  -8 24.7780 14.3673   1
  -6   6  -8 37.1831 12.4993   2
  -6   6  -9 368.103 35.8935   2
  -6  -6  -9 395.519 42.7849   1
   6  -6   9 389.577 44.7386   8
  -6   6  -9 331.186 43.1957   5
   6  -6  10 10.5376 14.0238   8
  -6   6 -10-3.74748 13.6584   5
  -6  -6 -10-6.17538 13.9350   1
  -6   6 -10 12.2292 9.72850   2
  -6   6 -11 66.6574 23.2898   5
  -6  -6 -11 148.897 27.1808   1
   6  -6  11 136.692 25.5350   8
  -6   6 -12 28.5722 19.6671   5
  -6  -6 -12 26.8736 17.9719   1
   6  -6  12 29.6994 16.5304   8
  -6   6 -13 8.34771 16.2000   5
  -6   6 -14 33.9335 21.9672   5
  -6   6 -15 12.6903 19.1041   5
  -6  -7  15 3.28970 16.0843   4
  -6   7  15 2.64457 14.0770   4
   6  -7 -15 5.22431 11.9303   7
  -6  -7  14 16.0168 17.5933   4
  -6   7  14 7.40769 13.1681   4
   6  -7 -14 15.7260 12.2203   7
   6  -7 -14 13.2851 10.2791   3
  -6  -7  13 101.718 23.7247   4
  -6   7  13 126.112 22.3493   4
   6  -7 -13 146.495 21.1474   7
  -6  -7  12-8.77768 14.8242   4
  -6   7  12 8.44565 11.5832   4
   6  -7 -12-3.42514 10.9280   7
   6  -7 -12 1.49737 10.4479   3
   6  -7 -11 309.557 28.6463   7
   6  -7 -11 231.770 25.1659   3
  -6  -7  11 268.029 33.1644   4
  -6   7  11 223.454 27.1770   4
  -6  -7  10 30.1573 13.4764   4
  -6   7  10 22.7381 9.87408   4
   6  -7 -10 11.9118 10.2589   7
   6  -7 -10 39.7320 10.2562   3
  -6  -7   9 647.163 57.0134   4
  -6   7   9 508.029 50.8720   4
  -6   7   9 792.449 55.7770   2
   6  -7  -9 616.943 50.5714   3
   6  -7  -9 887.601 57.1565   7
  -6   7   8 58.2141 13.0769   2
  -6  -7   8 55.7849 14.9806   4
  -6   7   8 50.9516 11.1128   4
   6  -7  -8 58.2640 11.1749   3
  -6  -7   7 389.188 36.1541   4
  -6   7   7 351.117 32.2953   4
  -6   7   7 341.465 34.9155   2
   6  -7  -7 410.235 31.9001   3
  -6  -7   6 235.472 24.3078   4
  -6   7   6 177.814 20.3608   4
   6  -7  -6 206.085 19.6799   3
  -6   7   6 198.393 24.0271   2
  -6   7   5 139.381 20.3973   2
   6  -7  -5 179.773 16.8946   3
  -6   7   5 167.932 18.7127   4
  -6  -7   5 153.791 19.6210   4
  -6   7   4 97.8388 16.6612   2
   6  -7  -4 84.2342 11.1548   3
  -6   7   3 44.0232 11.0281   5
   6  -7  -3 36.9222 7.34664   3
  -6   7   2 61.8460 15.3099   2
   6  -7  -2 83.0195 20.8790   8
   6  -7  -2 69.9703 9.02362   3
  -6   7   2 74.6453 13.5450   5
   6  -7  -1 420.088 30.8165   3
  -6   7   1 422.516 38.1091   5
   6  -7  -1 409.850 47.3357   8
  -6   7   1 342.981 38.6963   2
   6  -7   0 17.5319 5.07086   3
   6  -7   0 18.8314 14.6706   8
  -6   7   0 49.4152 14.3914   2
   6  -7   1 775.316 53.4789   3
  -6   7  -1 717.438 64.7496   2
   6  -7   1 814.148 73.6808   8
  -6  -7  -2 24.0179 10.5800   1
   6  -7   2 53.2745 17.6109   8
  -6  -7  -2 27.1875 6.72655   7
  -6  -7  -2 35.8090 8.30806   6
  -6   7  -2 18.8288 7.09404   6
  -6   7  -2 21.5789 11.1644   5
  -6   7  -2 31.5870 7.07803   3
   6  -7   2 16.0312 4.62613   3
  -6   7  -2 57.5137 15.4419   2
  -6   7  -3 499.612 51.3776   5
  -6  -7  -3 593.063 42.4276   7
  -6   7  -3 482.396 51.8795   2
   6  -7   3 537.398 58.5455   8
   6  -7   3 643.213 41.0886   3
  -6  -7  -3 557.913 45.3619   6
  -6   7  -3 569.022 46.1310   6
  -6  -7  -3 562.884 49.5402   1
  -6   7  -4 10.7416 10.7192   5
  -6   7  -4 2.70591 11.3853   2
  -6  -7  -4 25.1112 7.86440   6
  -6   7  -4 35.7923 9.61936   6
  -6  -7  -4 18.9270 11.0164   1
  -6  -7  -5 224.670 24.3752   6
   6   7   5 249.768 21.0945   5
  -6   7  -5 261.943 26.7660   6
  -6   7  -5 211.274 30.0107   5
  -6   7  -5 270.180 19.9296   3
  -6  -7  -5 256.626 29.5634   1
  -6   7  -5 210.619 29.8365   2
   6  -7   5 193.078 32.6071   8
  -6   7  -6 78.3127 9.14071   3
  -6  -7  -6 86.8448 14.8773   6
  -6   7  -6 91.6313 16.0843   6
  -6   7  -6 59.1577 19.2274   5
  -6  -7  -6 64.6878 16.5232   1
   6   7   6 98.3546 10.6917   5
   6  -7   6 52.8208 20.1111   8
  -6   7  -6 61.4102 16.1224   2
  -6  -7  -7 132.381 23.8729   1
  -6   7  -7 184.314 28.5309   5
   6  -7   7 116.200 25.6504   8
  -6   7  -7 192.742 25.5096   2
  -6  -7  -8 52.0930 17.7368   1
  -6   7  -8 54.0940 19.6576   5
   6  -7   8 77.6466 21.3000   8
  -6   7  -8 80.8027 17.4534   2
  -6   7  -9 31.0286 17.6015   5
   6  -7   9 21.6639 15.6805   8
  -6   7  -9 16.0101 11.7399   2
  -6  -7 -10 38.9841 17.8125   1
  -6   7 -10 61.6501 21.3909   5
   6  -7  10 53.0031 18.7514   8
  -6   7 -10 41.3084 14.0643   2
  -6   7 -11 98.5028 27.8045   5
  -6  -7 -11 139.901 28.1152   1
  -6   7 -12-4.44006 17.2257   5
  -6  -7 -12-3.56755 17.7627   1
  -6   7 -13 131.116 34.5381   5
  -6  -7 -13 158.694 30.9384   1
  -6   7 -14 4.57486 18.2635   5
  -6   7 -15 54.4799 28.5497   5
  -6  -8  15 123.802 27.2106   4
  -6   8  15 153.461 26.3932   4
  -6  -8  14 15.4297 15.0931   4
  -6   8  14-16.4042 15.2821   4
   6  -8 -14 1.78064 11.9725   7
  -6  -8  13 118.559 25.2452   4
  -6   8  13 84.4277 20.0636   4
   6  -8 -13 142.140 20.3445   7
  -6  -8  12 5.61987 14.7432   4
  -6   8  12 9.92944 10.9266   4
   6  -8 -12 24.7154 12.7853   7
   6  -8 -12 12.3280 9.54390   3
  -6  -8  11 89.2639 19.8107   4
  -6   8  11 61.3770 15.1099   4
   6  -8 -11 87.2005 14.6066   3
   6  -8 -11 85.6953 16.2677   7
  -6  -8  10 31.6615 14.9351   4
  -6   8  10 14.8826 9.46951   4
   6  -8 -10 30.0520 9.99918   3
   6  -8 -10 33.5558 12.2009   7
  -6   8  10 20.3068 11.5000   2
  -6  -8   9 11.0314 10.9936   4
  -6   8   9 3.03363 8.21093   4
   6  -8  -9 7.66977 8.25800   3
  -6   8   9 9.57871 10.3643   2
  -6  -8   8 14.0827 10.9020   4
  -6   8   8 13.8712 8.69284   4
  -6   8   8 7.86025 9.46021   2
   6  -8  -8 13.1397 8.06474   3
   6  -8  -7 359.204 30.5515   3
  -6   8   7 365.008 35.4901   2
  -6  -8   7 376.727 34.7387   4
  -6   8   7 325.039 30.6847   4
  -6  -8   6 13.2089 9.70932   4
  -6   8   6 6.18944 6.80273   4
   6  -8  -6 4.12882 6.74005   3
  -6   8   6 4.24992 9.17036   2
   6  -8  -5 709.556 51.7073   3
  -6   8   5 671.868 58.6100   2
   6  -8  -4 5.25528 5.65426   3
  -6   8   4 2.35337 9.13208   2
  -6   8   4 1.66280 7.34146   5
  -6   8   3 825.276 65.5365   5
   6  -8  -3 845.720 59.9554   3
   6  -8  -2 0.77517 4.89235   3
  -6   8   2-5.17079 11.6655   2
  -6   8   2 1.88285 7.92218   5
  -6   8   1 563.605 48.5193   5
   6  -8  -1 530.526 40.4277   3
  -6   8   1 618.298 53.4519   2
  -6   8   0 30.8290 11.8103   5
   6  -8   0 42.7411 7.07478   3
  -6   8   0 36.0456 15.4208   2
  -6   8  -1 205.691 29.2851   2
   6  -8   1 214.735 18.0968   3
   6  -8   1 238.452 35.4332   8
  -6  -8  -1 215.711 23.8568   1
   6  -8   2 84.9109 9.51449   3
   6  -8   2 79.1744 22.0838   8
  -6  -8  -2 91.3390 15.9333   1
  -6   8  -2 79.4410 19.1595   2
  -6  -8  -3 172.710 22.0506   1
  -6   8  -3 124.684 23.4411   5
  -6  -8  -3 153.821 17.4946   6
  -6   8  -3 163.452 18.0960   6
   6  -8   3 178.566 14.7103   3
   6  -8   3 150.144 28.2617   8
  -6  -8  -3 160.594 15.6388   7
  -6   8  -3 131.918 24.0252   2
  -6   8  -4 55.2728 16.9108   5
  -6  -8  -4 36.7075 13.4677   1
  -6   8  -4 76.3184 9.48132   3
  -6   8  -4 54.8199 16.7041   2
  -6  -8  -4 65.2758 11.3086   6
  -6   8  -4 63.2212 11.7728   6
  -6  -8  -5 311.753 27.8210   6
  -6   8  -5 313.589 29.2466   6
   6  -8   5 281.039 39.9419   8
  -6   8  -5 300.233 37.2138   5
   6   8   5 313.111 23.7934   5
  -6   8  -5 213.828 32.7596   2
  -6  -8  -5 244.251 31.2540   1
  -6  -8  -6 5.22694 11.7927   1
  -6   8  -6 10.1921 13.1794   5
   6  -8   6-3.86591 15.4316   8
  -6  -8  -6 4.62211 7.67104   6
  -6   8  -6 3.66546 8.44798   6
  -6   8  -6-9.07959 12.4123   2
  -6   8  -7 577.664 56.5405   2
  -6   8  -7 626.671 52.7455   6
  -6  -8  -7 631.458 50.3178   6
  -6   8  -7 560.611 59.1861   5
  -6  -8  -7 555.371 55.6610   1
  -6   8  -8 7.82597 16.0687   5
  -6  -8  -8 9.09608 12.7844   1
  -6   8  -8 22.8294 15.2104   2
  -6   8  -9 456.828 52.6771   5
  -6   8  -9 514.955 47.8281   2
  -6  -8  -9 407.317 47.7915   1
  -6   8 -10-13.0911 14.8035   5
  -6  -8 -10-3.42139 16.7270   1
  -6   8 -10 4.84757 11.4030   2
  -6   8 -11 64.1190 23.0842   5
  -6  -8 -11 115.251 25.3005   1
  -6   8 -12-14.1887 18.8932   5
  -6  -8 -12-7.51323 16.2134   1
  -6   8 -13 4.79764 18.0744   5
  -6  -8 -13 23.4042 20.4503   1
  -6   8 -14 9.66799 20.3488   5
  -6  -9  15 3.00111 16.2212   4
  -6  -9  14-8.74990 15.7647   4
  -6   9  14-6.55391 13.0008   4
   6  -9 -14 10.7469 14.5953   7
  -6  -9  13 78.6001 20.1338   4
  -6   9  13 60.4603 17.0634   4
   6  -9 -13 116.132 19.0541   7
  -6  -9  12-2.67001 13.7596   4
  -6   9  12-7.40249 11.2845   4
   6  -9 -12-1.80251 11.5026   7
   6  -9 -12 6.28644 10.4562   3
  -6   9  11 291.129 29.8183   4
  -6   9  11 317.853 31.7777   2
  -6  -9  11 205.474 30.4268   4
   6  -9 -11 324.453 31.8394   7
   6  -9 -11 313.809 29.4383   3
  -6  -9  10 20.6623 12.0726   4
  -6   9  10 12.4971 9.46990   4
  -6   9  10 19.7563 11.0471   2
   6  -9 -10 18.1959 9.82317   3
   6  -9 -10 12.8013 10.6587   7
  -6   9   9 457.313 44.2980   2
  -6  -9   9 505.358 45.6475   4
  -6   9   9 489.792 41.2380   4
   6  -9  -9 529.715 41.4292   3
  -6   9   8 4.26138 10.8074   2
   6  -9  -8 6.13410 8.33908   3
  -6  -9   8 21.2849 10.1491   4
  -6   9   8 4.00427 7.44700   4
  -6   9   7 216.562 27.0627   2
  -6  -9   7 198.052 23.4959   4
  -6   9   7 173.384 20.6280   4
   6  -9  -7 215.651 20.8613   3
   6  -9  -6 16.1169 7.78127   3
  -6   9   6 21.2043 13.3478   2
  -6   9   6 17.7730 8.19394   4
  -6   9   5 94.8253 19.9815   2
   6  -9  -5 137.907 15.3846   3
  -6   9   4 12.4780 8.87971   5
   6  -9  -4 1.91006 6.10177   3
  -6   9   4 2.64241 12.1830   2
   6  -9  -3 20.0171 6.91003   3
  -6   9   3 34.3537 11.7360   5
   6  -9  -2 4.96339 5.72931   3
  -6   9   2 6.10520 9.38604   5
  -6   9   1 289.498 34.7493   2
   6  -9  -1 267.779 22.3671   3
  -6   9   1 231.910 28.6439   5
  -6   9   0 12.3703 11.6389   2
   6  -9   0-0.71874 4.92417   3
  -6   9   0 4.78498 9.28153   5
  -6   9  -1 569.380 60.1093   2
  -6   9  -1 585.331 57.9555   5
  -6  -9  -1 757.264 54.5423   1
   6  -9   1 681.008 47.9709   3
  -6  -9  -2 7.15429 9.66990   1
   6  -9   2 5.92505 4.84402   3
  -6   9  -2-6.52349 14.7194   2
  -6   9  -3 640.935 64.1833   2
  -6  -9  -3 705.865 52.7666   6
  -6   9  -3 652.428 52.4792   6
   6  -9   3 745.104 49.7719   3
  -6  -9  -3 675.059 58.3128   1
  -6  -9  -4 7.11097 6.78398   6
  -6   9  -4 1.32378 6.59185   6
  -6   9  -4-3.14136 12.5399   5
  -6   9  -4-10.0530 13.7431   2
  -6  -9  -4 6.65052 10.6359   1
  -6  -9  -5 279.044 32.4802   1
  -6   9  -5 294.410 37.4089   2
  -6   9  -5 261.566 26.6469   6
  -6  -9  -5 266.132 25.5603   6
  -6   9  -5 275.813 36.6233   5
  -6   9  -6-14.7491 15.8985   5
  -6  -9  -6-1.43947 8.01419   6
  -6   9  -6-3.39433 8.60069   6
  -6   9  -6-3.35567 13.3958   2
  -6  -9  -6 8.11766 13.4723   1
  -6   9  -7 47.3547 19.9463   5
  -6  -9  -7 57.7212 12.7309   6
  -6   9  -7 30.8320 11.5544   6
  -6   9  -7 79.0812 19.4188   2
  -6  -9  -7 100.010 21.3564   1
  -6   9  -8 8.44177 14.3183   5
  -6   9  -8-6.42521 10.4705   6
  -6  -9  -8-1.81017 9.63414   6
  -6   9  -8-3.18864 14.3875   2
  -6  -9  -8 6.33517 14.2925   1
  -6   9  -9 62.2504 21.4700   5
  -6   9  -9 90.7733 21.0915   2
  -6  -9  -9 71.0783 23.6832   1
  -6   9 -10 18.6455 17.5617   5
  -6   9 -10 2.79127 13.6706   2
  -6  -9 -10 25.1461 18.8358   1
  -6  -9 -11 109.810 25.7508   1
  -6   9 -11 86.6153 28.9926   5
  -6  -9 -12-3.96379 19.0185   1
  -6   9 -12 14.8349 18.0218   5
  -6   9 -13 144.805 36.0676   5
  -6 -10  14-2.73934 14.1174   4
   6 -10 -13 68.2480 16.5207   7
  -6 -10  13 21.0980 14.9290   4
   6 -10 -12 3.64775 12.0125   7
  -6 -10  12-12.4063 13.2063   4
   6 -10 -12 3.19655 10.5268   3
  -6  10  11 6.34148 9.10665   4
  -6 -10  11-2.33587 11.8607   4
   6 -10 -11 21.3138 11.2144   3
   6 -10 -11 11.2436 12.8591   7
  -6  10  11 34.6135 13.2949   2
  -6 -10  10 13.0003 12.4455   4
  -6  10  10 25.0490 10.5203   4
   6 -10 -10 30.2953 10.9944   3
  -6  10  10 17.1737 11.1135   2
   6 -10 -10 1.90499 12.4629   7
  -6  10   9 20.0471 12.8284   2
   6 -10  -9 30.1157 10.8711   3
  -6 -10   9 10.0124 10.7543   4
  -6  10   9 27.3214 9.55365   4
  -6  10   8 30.3522 13.9577   2
  -6 -10   8 29.0738 12.6347   4
  -6  10   8 15.5062 9.03441   4
   6 -10  -8 18.1982 9.00432   3
   6 -10  -7 178.252 17.4229   3
  -6  10   7 167.858 23.2298   2
   6 -10  -6 24.1693 8.85662   3
  -6  10   6 20.8592 13.2945   2
   6 -10  -5 441.420 36.0317   3
  -6  10   5 435.762 44.9817   2
  -6  10   4 11.6687 14.0147   2
   6 -10  -4 18.4160 8.64197   3
  -6  10   4 5.70526 8.03657   5
  -6  10   3 668.781 58.6319   5
   6 -10  -3 736.869 52.8075   3
  -6  10   2 4.37170 9.65284   5
   6 -10  -2 6.23848 6.45083   3
  -6  10   1 183.542 25.5733   5
  -6  10   1 200.718 29.7318   2
   6 -10  -1 185.863 17.8552   3
   6 -10   0 16.9667 6.32202   3
  -6  10   0 2.62008 10.7764   5
  -6  10   0 16.9842 13.9547   2
  -6 -10  -1 59.7364 12.8526   1
   6 -10   1 53.2960 8.75906   3
  -6  10  -1 60.4407 17.6832   5
  -6  10  -1 38.3366 17.9961   2
  -6 -10  -2 43.4990 13.1439   1
  -6  10  -2 31.9410 16.9040   2
   6 -10   2 47.1107 8.11908   3
  -6  10  -2 24.5119 14.3686   5
  -6 -10  -3 50.8499 14.2146   1
  -6  10  -3 39.9099 17.1737   2
   6 -10   3 70.5594 9.64563   3
  -6 -10  -4 1.09265 5.81545   6
  -6  10  -4-2.38885 7.28289   6
  -6  10  -4-3.64622 13.7220   2
  -6 -10  -4 2.27051 11.8938   1
  -6 -10  -5 162.955 18.2079   6
  -6  10  -5 173.159 18.9644   6
  -6  10  -5 94.9169 25.4944   5
  -6  10  -5 124.171 26.8558   2
  -6 -10  -5 160.638 24.7681   1
  -6 -10  -6 19.5798 14.6523   1
  -6 -10  -6-1.31855 7.54595   6
  -6  10  -6 1.55738 8.15815   6
  -6  10  -6-7.28695 16.4397   2
  -6  10  -6-7.87971 16.9865   5
  -6 -10  -7 324.305 28.3743   6
  -6  10  -7 269.442 29.2992   6
  -6  10  -7 315.582 40.0843   2
  -6  10  -7 205.811 37.3885   5
  -6 -10  -7 241.083 34.3176   1
  -6 -10  -8-3.29219 16.6801   1
  -6  10  -8-1.99612 10.9507   6
  -6 -10  -8-1.64905 9.56410   6
  -6  10  -8 4.47394 16.3024   5
  -6  10  -8 6.93200 15.6390   2
  -6 -10  -9 268.057 37.8894   1
  -6  10  -9 187.549 38.0053   5
  -6  10  -9 210.777 28.3468   6
  -6 -10  -9 268.268 28.5204   6
  -6 -10 -10 8.28991 11.8876   6
  -6  10 -10 4.89349 15.9687   5
  -6  10 -10 15.5227 16.0182   2
  -6 -10 -10 30.0248 19.9907   1
  -6  10 -11 80.4229 29.8336   5
  -6 -10 -11 114.952 28.6194   1
  -6  10 -12 35.9737 23.7999   5
  -6  11  12 8.35010 11.4573   2
   6 -11 -12 1.85634 12.2304   7
   6 -11 -11 85.8362 16.4807   3
  -6  11  11 103.748 19.7639   2
   6 -11 -11 117.073 19.9976   7
   6 -11 -10 1.51128 9.64519   3
  -6  11  10-4.59769 11.8477   2
  -6 -11  10 12.1006 11.2269   4
  -6  11   9 299.228 32.8208   2
   6 -11  -9 320.466 28.4437   3
   6 -11  -8 5.49521 8.47705   3
  -6  11   8-2.55566 13.6025   2
   6 -11  -7 177.973 20.5973   3
  -6  11   7 181.997 26.3666   2
   6 -11  -6 9.62100 8.16556   3
  -6  11   6-5.80567 13.6593   2
  -6  11   5 104.042 17.1842   5
   6 -11  -5 75.1060 12.2664   3
  -6  11   5 82.5786 21.4426   2
  -6  11   4 66.6567 14.6522   5
   6 -11  -4 59.9328 11.3148   3
  -6  11   4 28.6727 16.2481   2
  -6  11   3 32.8540 12.6558   5
   6 -11  -3 47.1821 9.77809   3
  -6  11   2 61.0619 16.2800   5
   6 -11  -2 62.6011 10.5644   3
   6 -11  -1 183.938 17.9334   3
  -6  11   1 161.228 28.7612   2
  -6  11   1 151.449 24.0343   5
  -6  11   0 22.0535 16.6628   2
  -6  11   0 25.2815 12.7770   5
   6 -11   0 25.5927 7.82310   3
  -6 -11  -1 302.160 31.2889   1
  -6  11  -1 276.868 41.0896   2
   6 -11   1 347.857 27.7543   3
  -6  11  -2-7.70365 14.0392   2
   6 -11   2-1.66468 5.81673   3
  -6  11  -2-19.7298 15.4722   5
  -6 -11  -2-3.65552 10.3229   1
  -6  11  -3 439.119 48.9781   5
  -6 -11  -3 468.147 42.4012   1
  -6  11  -3 397.349 51.4521   2
  -6 -11  -4 9.25680 11.9275   1
  -6  11  -4-3.93362 15.2607   2
  -6  11  -5 112.178 14.8575   6
  -6 -11  -5 109.644 23.1413   1
  -6  11  -5 86.2620 23.1689   2
  -6 -11  -6 37.4006 17.6205   1
  -6  11  -6 27.9154 10.3903   6
  -6  11  -6 4.14496 18.7762   5
  -6  11  -6 27.2594 18.3943   2
  -6 -11  -7 22.0588 16.2589   1
  -6  11  -7 9.46259 9.30115   6
  -6  11  -7 4.39469 17.0667   5
  -6  11  -7 19.1259 15.7077   2
  -6 -11  -8 40.9256 20.5044   1
  -6  11  -8 49.7156 13.6822   6
  -6  11  -8 37.2648 21.2215   5
  -6  11  -8 48.4661 21.5365   2
  -6 -11  -9-7.33226 17.2569   1
  -6  11  -9 11.9016 11.9653   6
  -6  11  -9 9.71894 19.9380   5
  -6  11  -9 24.9381 17.7465   2
  -6 -11 -10-3.91058 16.8604   1
  -6  11 -10-5.05210 16.4657   5
  -6  11 -10 2.19178 11.8461   6
  -6  12  12 10.9797 12.4162   2
  -6  12  11 16.4022 13.0781   2
   6 -12 -11 13.7411 12.6985   7
  -6  12  10 78.5018 19.2830   2
   6 -12  -9 23.6142 11.2658   3
  -6  12   9 13.0188 14.3397   2
   6 -12  -8 113.296 16.5201   3
  -6  12   8 102.526 21.8643   2
   6 -12  -7 196.313 21.1779   3
  -6  12   7 139.813 26.6184   2
  -6  12   6 9.49344 15.5654   2
   6 -12  -6 35.2182 11.0447   3
  -6  12   5 136.499 26.7698   2
   6 -12  -5 158.197 18.4394   3
  -6  12   5 186.088 23.4285   5
  -6  12   4-3.47658 15.3432   2
   6 -12  -4 5.63375 8.00603   3
  -6  12   4 2.13993 10.0686   5
  -6  12   3 315.685 39.7482   2
   6 -12  -3 269.791 25.5692   3
  -6  12   3 275.028 32.1388   5
   6 -12  -2 6.27874 7.24228   3
  -6  12   2 2.51418 10.5836   5
   6 -12  -1 83.8846 12.1625   3
  -6  12   1 73.4412 22.3707   2
  -6  12   1 60.2259 18.3336   5
   6 -12   0 33.0520 8.64165   3
  -6  12   0 15.9522 18.8333   2
  -6  12   0 12.0015 13.6388   5
   6 -12   1 14.2663 8.00907   3
  -6  12  -1 20.4183 17.2080   2
  -6 -12  -1 14.0597 10.3315   1
  -6  12  -1 13.1990 13.5652   5
  -6  12  -2 79.1459 22.2416   2
  -6 -12  -2 63.9886 14.7233   1
   6 -12   2 69.8935 11.0948   3
  -6  12  -2 52.6819 19.1818   5
  -6 -12  -3 4.15226 11.8901   1
  -6  12  -3 3.68691 13.8825   5
  -6  12  -3 16.8151 15.8267   2
  -6 -12  -4 39.8084 15.6253   1
  -6  12  -4 42.2579 21.6423   5
  -6 -12  -5 111.155 21.4365   1
  -6  12  -5 75.4863 24.1411   2
  -6 -12  -6-11.7547 18.5482   1
  -6  12  -6 41.4147 20.9841   2
  -6 -12  -7 180.875 31.1703   1
  -6  12  -7 137.304 35.5279   5
  -6 -12  -8-3.51513 17.8136   1
  -6  12  -8-9.64348 19.2503   5
  -6  12  -8-3.91308 19.1337   2
  -6 -12  -9 124.875 28.5608   1
  -6  12  -9 164.700 31.7752   2
  -6  13  10 10.4696 15.9733   2
  -6  13   9 95.3830 22.1490   2
   6 -13  -8-1.44296 9.97632   3
  -6  13   8 6.00101 15.2023   2
   6 -13  -7 37.0778 11.5283   3
  -6  13   7 22.5272 16.7150   2
   6 -13  -6 32.7572 11.2877   3
  -6  13   6 30.7116 19.3747   2
   6 -13  -5 17.3824 9.66187   3
  -6  13   5 3.58751 15.8491   2
  -6  13   5 8.25219 11.3426   5
   6 -13  -4 69.7371 12.7695   3
  -6  13   4 63.8194 22.8318   2
  -6  13   4 87.4905 18.5213   5
   6 -13  -3 1.16842 8.08428   3
  -6  13   3 3.91015 16.4551   2
  -6  13   3 17.0985 13.5995   5
   6 -13  -2 96.9829 14.6285   3
  -6  13   2 132.006 22.7092   5
   6 -13  -1 54.4089 11.4097   3
  -6  13   1 62.2619 23.3562   2
  -6  13   1 46.4564 16.0623   5
   6 -13   0 33.1634 9.89827   3
  -6  13   0 25.4663 18.8571   2
  -6  13   0 44.1730 17.9448   5
  -6  13  -1 99.6635 28.3563   2
  -6  13  -1 146.726 28.6040   5
   6 -13   1 137.218 16.1326   3
  -6  13  -2 14.8798 15.2757   5
  -6  13  -2 8.80645 17.0988   2
  -6 -13  -3 139.286 23.1403   1
  -6  13  -3 164.165 31.8333   5
  -6  13  -3 119.505 28.1285   2
  -6 -13  -4 28.2015 16.1246   1
  -6  13  -4-4.06536 18.7616   5
  -6  13  -4 31.0304 20.4537   2
  -6 -13  -5 26.5603 15.9700   1
  -6  13  -5 34.0691 22.7810   5
  -6  13  -5 56.9728 23.4371   2
  -6 -13  -6 68.3604 21.7740   1
  -6  13  -6 73.3177 25.7428   2
  -6 -13  -7 19.6613 19.5338   1
  -6  13  -7 16.8883 18.2409   2
  -6 -13  -8 57.3533 24.1937   1
  -6  13  -8 69.1868 23.9537   2
  -6  13  -9-11.7305 20.8243   2
  -6  14   7 20.7449 20.3584   2
  -6  14   6 25.6146 19.8176   2
   6 -14  -6 17.8817 11.0542   3
  -6  14   5 72.6426 17.7982   5
  -6  14   5 61.1948 22.8639   2
   6 -14  -5 62.9058 13.3387   3
  -6  14   4 2.32319 12.5561   5
  -6  14   4 4.00125 19.9200   2
   6 -14  -4-2.57166 9.75338   3
  -6  14   3 92.0844 19.8138   5
   6 -14  -3 62.5311 12.6433   3
  -6  14   2 27.7565 15.0425   5
   6 -14  -2 13.2549 9.27678   3
  -6  14   1 18.2331 16.2073   5
  -6  14   1 17.6001 18.5430   2
   6 -14  -1 15.3443 9.28403   3
  -6  14   0 75.9681 22.7258   5
  -6  14   0 40.3835 21.4441   2
   6 -14   0 59.6046 12.1197   3
  -6  14  -1 10.9176 17.8030   5
  -6  14  -1 9.20677 18.8897   2
  -6  14  -2 54.8605 24.3059   5
  -6  14  -2 87.8832 27.5406   2
  -6  14  -3 8.21893 17.3094   5
  -6  14  -3 18.5245 18.5032   2
  -6  14  -4 38.4609 21.4309   5
  -6  14  -4 41.5706 21.0002   2
  -6 -14  -5 10.5285 16.2579   1
  -6  14  -5 13.2489 22.3893   5
  -6  14  -5 13.6474 17.6645   2
  -6 -14  -6 14.8482 17.2347   1
  -6  14  -6 4.45609 18.7599   2
  -6 -14  -7 46.0628 20.0320   1
  -6  14  -7 43.4569 24.0159   2
  -6  15   5 21.9468 13.9233   5
  -6  15   4 124.211 22.7725   5
  -6  15   3 18.5116 14.7414   5
   6 -15  -3 9.26856 10.6738   3
  -6  15   2 134.397 25.0646   5
   6 -15  -2 148.098 19.0985   3
  -6  15   1 18.8312 16.9839   5
   6 -15  -1 11.3067 9.71192   3
   6 -15   0 31.0572 10.9883   3
  -6  15   0 64.7052 21.1525   5
  -6  15  -1 11.1645 18.2076   5
  -6  15  -2 28.3229 20.5809   5
  -6  16   4 17.0410 14.8840   5
  -6  16   3 32.3029 16.7375   5
  -7   0  15-3.35462 15.4627   4
   7   0 -15-1.98676 11.2164   3
   7   0 -14 265.782 30.0996   3
  -7   0  14 256.087 35.6882   4
  -7   0  13-9.10180 14.8436   4
   7   0 -12 312.056 35.1528   3
  -7   0  12 366.028 40.9749   4
   7   0 -11 39.3659 14.7995   3
  -7   0  11 29.3269 14.3436   4
   7   0 -11 30.2104 12.4851   7
   7   0 -10 1.76806 10.7945   3
  -7   0  10 31.9755 12.6870   4
   7   0 -10 5.27303 9.79883   7
  -7   0   9 13.5019 9.78602   4
   7   0  -9 32.8965 10.6980   8
   7   0  -9 15.0572 10.0369   7
  -7   0   8 173.912 21.9214   4
   7   0  -8 157.866 19.5393   8
   7   0  -7 47.3251 12.2262   8
  -7   0   7 32.1288 11.1033   4
   7   0  -6 1161.41 84.7115   7
  -7   0   6 1155.95 86.6706   4
  -7   0   5 16.6180 8.01206   4
   7   0  -5 8.31849 7.86694   7
   7   0  -4 1272.67 86.3233   7
  -7   0   4 1095.30 87.4283   4
   7   0  -2 1601.71 111.739   7
   7   0  -1 34.3446 8.97927   7
   7   0   0 960.311 69.8961   7
   7   0   1 69.7968 11.0208   7
  -7   0  -1 53.8589 11.5132   6
   7   0   2 104.825 12.8814   7
  -7   0  -2 77.1648 13.1544   6
   7   0   3 82.8963 7.48391   3
  -7   0  -3 67.6824 13.0110   6
   7   0   4 236.152 16.7796   3
   7   0   4 257.331 16.7150   3
  -7   0  -4 223.385 25.7957   6
  -7   0  -5 93.5875 16.4269   6
  -7   0  -5 60.9422 11.3788   5
  -7   0  -6 1209.17 86.9468   5
  -7   0  -7 15.2600 6.97608   5
  -7   0  -8 679.764 55.2094   5
   7   0   8 741.555 61.6520   8
   7   0   8 718.292 54.3830   2
  -7   0  -9 3.02051 8.64847   5
   7   0   9 7.47880 10.7525   8
   7   0  10 726.181 63.1823   8
  -7   0 -10 708.974 56.4557   5
   7   0  11 36.1729 16.2515   8
  -7   0 -11 27.2203 10.3959   5
   7   0  12 79.0491 20.8723   8
   7   0  13 27.5865 17.1532   8
   7   0  14 6.37946 14.0820   8
   7  -1 -15 55.8471 15.0514   3
   7   1 -15 44.3318 15.7236   3
  -7   1  15 16.4192 16.2581   4
   7   1 -14 16.8952 13.2353   3
  -7   1  14 21.8569 16.9190   4
  -7   1  13 20.6658 14.5113   4
   7  -1 -13 25.9506 14.0097   7
   7  -1 -12 410.825 35.0968   7
  -7   1  12 354.833 38.4626   4
   7  -1 -11 8.47863 10.3669   3
  -7   1  11 12.9004 11.9158   4
   7   1 -11 9.63648 11.0555   7
   7  -1 -11 16.2007 10.7377   7
   7   1 -10 614.370 46.9099   8
  -7   1  10 641.336 54.1085   4
   7  -1 -10 522.514 48.2730   3
   7  -1 -10 599.953 49.8937   7
   7   1 -10 606.050 50.1970   7
   7  -1  -9-3.10478 8.76329   3
  -7   1   9 2.17184 8.90677   4
   7  -1  -9 5.05749 8.39283   8
   7   1  -9 1.31720 6.89998   8
   7   1  -9 3.45204 8.11953   7
   7  -1  -9-5.03723 8.93635   7
   7  -1  -8 897.228 71.3231   8
  -7   1   8 921.638 72.6209   4
   7  -1  -8 853.445 69.1806   3
   7  -1  -8 1052.45 71.8428   7
   7  -1  -7 40.0991 10.1563   3
  -7   1   7 18.2775 8.69099   4
   7  -1  -7 12.8555 9.39069   8
   7   1  -7 9.24747 10.1259   7
  -7   1   6 783.049 63.9737   4
   7  -1  -6 894.334 66.3500   8
   7   1  -6 931.778 64.2236   7
   7  -1  -6 736.746 61.6598   3
   7  -1  -5 127.499 18.4175   8
  -7   1   5 108.365 16.3474   4
   7  -1  -5 157.961 16.7692   3
   7   1  -5 104.338 16.2937   7
   7  -1  -5 113.316 15.9603   7
   7  -1  -4 25.6497 8.00697   7
   7   1  -4 32.3827 8.58585   7
   7  -1  -4 22.3205 9.88672   8
  -7   1   4 22.9705 8.44465   4
   7   1  -3 201.817 21.4313   7
   7  -1  -3 174.506 21.0987   7
   7  -1  -3 259.323 26.3749   8
   7  -1  -3 249.606 20.8655   3
   7   1  -2 263.145 24.0868   7
   7  -1  -2 267.728 24.7009   7
   7  -1  -2 237.007 21.6112   3
   7  -1  -1 69.9463 12.7664   7
   7   1  -1 101.754 13.6973   7
   7  -1  -1 111.650 12.1761   3
   7   1   0 1415.36 95.6028   7
   7  -1   0 1329.57 91.7035   3
  -7  -1  -1 21.9955 7.31672   6
   7  -1   1 26.7161 5.06336   3
   7   1   1 41.7908 8.30971   7
   7   1   2 1219.72 78.6551   7
  -7  -1  -2 1056.21 80.9948   6
   7  -1   2 1081.71 73.4604   3
   7  -1   3 2.01004 2.47023   3
   7   1   3 2.86603 5.08558   7
  -7  -1  -3 1.58794 6.68216   6
  -7   1  -3-1.35533 5.84439   5
   7   1   4 1520.68 98.5928   7
  -7   1  -4 1325.94 100.986   5
  -7  -1  -4 1262.44 102.277   6
   7   1   4 1437.20 93.0015   3
   7   1   5 109.305 11.7052   7
  -7   1  -5 116.747 14.9228   5
  -7  -1  -5 82.8262 14.6308   6
   7  -1   5 111.952 18.6284   8
   7   1   5 86.4365 5.49504   3
   7   1   5 59.4346 5.51496   3
  -7   1  -6 376.584 34.5623   5
   7   1   6 396.717 30.3822   7
   7  -1   6 362.838 38.1442   8
   7   1   7 78.6409 10.3499   7
   7  -1   7 81.6602 17.3446   8
  -7   1  -7 70.5110 13.1138   5
   7  -1   8 13.0356 12.5863   8
  -7   1  -8 20.6718 9.82577   5
   7   1   8 22.5992 6.35317   7
   7   1   8 24.6415 7.65622   2
  -7   1  -9 23.4779 10.3574   5
   7  -1   9 38.4326 14.7242   8
  -7   1 -10 107.741 17.8051   5
   7  -1  10 124.000 23.1550   8
   7   1  10 127.464 20.4782   8
  -7   1 -11 17.6007 10.9810   5
   7  -1  11 15.1681 14.9010   8
   7   1  11 38.5239 14.7689   8
  -7   1 -12 299.351 31.5291   5
   7  -1  12 272.474 37.3860   8
   7   1  12 304.393 35.6856   8
   7   1  13 8.58439 14.7536   8
   7  -1  13 6.58035 14.1937   8
   7  -1  14 196.411 32.5210   8
   7   1  14 236.639 32.6805   8
   7   2 -15 4.58097 12.1911   3
   7  -2 -15 3.73351 11.1087   3
  -7  -2  15-6.92066 14.1915   4
  -7   2  15-12.8141 15.6617   4
   7  -2 -14 250.600 27.5353   7
   7   2 -14 227.937 28.0672   3
  -7  -2  14 163.116 30.4646   4
   7  -2 -13 1.97934 11.1734   7
  -7  -2  13-9.53953 14.6563   4
  -7   2  13 5.72460 12.9149   4
  -7  -2  12 207.302 30.2094   4
  -7   2  12 193.070 28.5598   4
   7  -2 -12 197.096 23.7877   3
   7  -2 -12 248.831 26.4835   7
   7  -2 -11 46.6765 13.7210   7
  -7  -2  11 64.6974 17.7599   4
  -7   2  11 32.2778 14.7020   4
   7  -2 -10 2.98769 7.95105   3
  -7  -2  10-2.59815 10.9323   4
  -7   2  10-9.14364 11.3806   4
   7  -2 -10-1.75465 9.33904   7
   7   2 -10 3.78455 9.58777   7
   7  -2  -9 155.055 21.7136   8
  -7   2   9 181.834 23.6969   4
  -7  -2   9 181.371 24.8018   4
   7  -2  -9 186.235 20.7900   3
   7  -2  -9 202.902 22.4876   7
   7  -2  -8 51.5698 10.8439   3
  -7  -2   8 35.1955 12.2716   4
  -7   2   8 65.5770 13.7970   4
   7  -2  -8 39.8446 10.8248   7
   7  -2  -8 49.0926 13.1230   8
   7  -2  -7 67.3850 16.0335   8
  -7  -2   7 61.7433 14.3803   4
  -7   2   7 80.8609 14.4571   4
   7   2  -7 86.3340 14.6454   7
   7  -2  -6 846.303 64.7320   8
  -7  -2   6 793.437 61.9195   4
  -7   2   6 733.815 59.8740   4
   7  -2  -6 722.043 56.7520   3
   7   2  -6 773.686 59.2721   7
   7  -2  -5 49.2074 9.12057   3
  -7  -2   5 38.4724 11.6215   4
  -7   2   5 34.6487 9.89208   4
   7  -2  -5 43.4068 10.0244   7
   7   2  -5 55.3921 10.4697   7
   7  -2  -5 35.0325 12.5043   8
  -7  -2   4 668.157 62.0138   4
  -7   2   4 783.513 63.0487   4
   7   2  -4 865.002 62.2649   7
   7  -2  -4 853.946 62.6099   7
   7  -2  -4 851.482 59.3408   3
   7  -2  -4 885.708 67.6271   8
   7   2  -3 21.9053 7.82109   7
   7  -2  -3 8.25688 6.91729   7
   7  -2  -3 16.9711 5.76942   3
   7  -2  -3 10.9248 9.46861   8
   7  -2  -2 1024.87 76.9847   3
   7  -2  -2 1270.38 88.1713   8
   7   2  -2 1243.03 81.6338   7
   7  -2  -1 205.670 17.3983   3
   7  -2  -1 213.619 25.7879   8
   7   2  -1 201.799 20.4964   7
   7  -2   0 784.234 55.1000   3
   7  -2   0 802.399 66.3137   8
   7   2   0 842.883 59.3269   7
  -7  -2  -1 154.310 18.5027   6
  -7   2  -1 131.549 17.6686   6
   7  -2   1 183.019 13.9371   3
   7   2   1 155.729 16.8531   7
  -7   2  -2 65.0246 11.0677   5
   7  -2   2 54.9652 5.82005   3
  -7  -2  -2 58.3168 11.0712   6
  -7   2  -2 51.0627 10.8290   6
   7   2   2 58.2054 9.48735   7
   7  -2   2 67.3074 15.1002   8
  -7   2  -3 102.631 14.8212   5
   7   2   3 103.152 12.3836   7
  -7  -2  -3 95.5190 14.9019   6
  -7   2  -3 108.776 16.0804   6
   7   2   3 89.1341 9.25350   3
   7  -2   3 116.258 8.40160   3
   7  -2   3 126.542 19.7329   8
   7   2   4 147.450 14.5415   7
  -7   2  -4 108.918 17.2399   6
  -7  -2  -4 128.259 18.0512   6
   7   2   4 148.219 10.8499   3
  -7   2  -4 111.421 16.7187   5
   7   2   5 104.199 7.73805   3
  -7   2  -5 62.3625 13.3282   5
   7   2   5 97.0856 11.2726   7
   7  -2   5 82.1166 17.6291   8
  -7  -2  -5 90.4648 16.1263   6
  -7   2  -5 61.4776 14.7597   6
   7   2   6 821.068 61.5651   7
   7   2   6 919.365 58.0780   3
   7  -2   6 765.843 71.9359   8
  -7   2  -6 753.223 67.4087   5
   7   2   7 43.7684 7.26763   7
   7  -2   7 47.1438 15.5293   8
  -7   2  -7 68.5013 13.7545   5
   7  -2   8 628.570 58.8826   8
   7   2   8 671.937 43.9502   7
  -7   2  -8 588.805 53.0101   5
   7   2   8 568.340 46.9514   2
   7  -2   9 6.06777 11.7689   8
  -7   2  -9-4.27643 9.43575   5
  -7   2 -10 600.980 50.1938   5
   7  -2  10 540.147 54.1522   8
  -7  -2 -10 458.039 50.6745   1
  -7   2 -11 42.5053 14.2866   5
   7  -2  11 46.3246 18.0691   8
  -7  -2 -11 32.1554 16.0088   1
  -7   2 -12 48.9293 15.9821   5
  -7  -2 -12 51.1813 18.6736   1
   7  -2  12 44.3038 18.7347   8
   7   2  12 71.1860 19.4395   8
  -7  -2 -13 58.6728 20.0557   1
   7   2  13 93.8110 20.7213   8
   7  -2  13 68.7574 20.9966   8
   7  -2  14 3.41551 14.3754   8
   7   2  14 8.42556 16.2926   8
   7  -2  15 35.9914 18.8680   8
   7  -3 -15 115.764 19.3206   3
  -7  -3  15 111.790 26.4919   4
  -7   3  15 87.1945 24.0267   4
   7  -3 -15 133.459 21.7534   7
  -7  -3  14 20.2532 16.2071   4
  -7   3  14 5.89103 14.4150   4
   7  -3 -14 8.05622 11.5452   7
  -7  -3  13 35.5554 18.5411   4
  -7   3  13 55.3617 17.9675   4
   7  -3 -13 59.2192 16.0105   7
  -7  -3  12 266.304 34.2815   4
   7  -3 -12 275.418 28.1440   3
   7  -3 -12 345.603 31.4613   7
   7  -3 -11 32.2292 10.6919   3
  -7  -3  11 60.0280 18.0616   4
  -7   3  11 35.7576 14.1114   4
   7  -3 -11 62.0208 13.6987   7
   7  -3 -10 481.928 43.0600   3
   7  -3 -10 594.357 46.8880   7
  -7  -3  10 538.164 50.8650   4
  -7   3  10 515.486 47.6481   4
  -7  -3   9 9.77196 10.2853   4
  -7   3   9 12.0626 9.83502   4
   7  -3  -9 12.1139 8.31185   3
   7  -3  -9-1.66778 8.00902   7
   7  -3  -9-1.78050 9.18227   8
   7  -3  -8 697.197 60.1741   8
   7  -3  -8 680.707 54.5805   3
   7  -3  -8 791.554 58.3972   7
   7   3  -8 783.279 59.2090   7
  -7  -3   8 730.746 60.6877   4
  -7   3   8 657.791 57.4093   4
  -7  -3   7 53.2997 13.5514   4
  -7   3   7 59.5841 11.9733   4
   7  -3  -7 33.5297 13.0354   8
   7  -3  -7 55.3193 10.8242   3
   7   3  -7 71.8427 13.7996   7
   7  -3  -7 56.5618 12.4320   7
  -7  -3   6 548.535 47.1456   4
  -7   3   6 524.497 44.6780   4
   7  -3  -6 559.045 50.7599   8
   7  -3  -6 500.191 41.4880   3
   7   3  -6 592.779 45.8289   7
  -7  -3   5 251.982 28.8952   4
  -7   3   5 335.534 29.6532   4
   7   3  -5 271.482 27.7736   7
   7  -3  -5 252.297 32.7075   8
   7  -3  -5 330.511 26.0150   3
  -7   3   4-4.37950 6.44426   4
   7  -3  -4 13.0580 11.2610   8
   7   3  -4 5.59927 6.97089   7
   7  -3  -4 5.98508 5.33855   3
   7   3  -3 570.611 46.9811   7
   7  -3  -3 586.498 43.6722   3
   7  -3  -3 697.979 56.6209   8
   7   3  -2 195.447 19.7606   7
   7  -3  -2 201.615 16.9731   3
   7  -3  -2 150.446 24.4698   8
   7   3  -1 391.002 33.6941   7
   7  -3  -1 395.724 41.3981   8
   7  -3  -1 411.858 30.2469   3
   7   3   0 1642.95 117.241   7
  -7   3   0 1495.47 119.306   5
   7  -3   0 1573.07 126.104   8
   7  -3   0 1873.93 114.324   3
   7  -3   1 284.372 34.1991   8
  -7   3  -1 275.666 28.3355   5
   7   3   1 322.574 26.7832   7
   7  -3   1 312.561 22.5955   3
  -7  -3  -1 314.444 28.5706   6
  -7   3  -1 314.184 28.6279   6
   7  -3   2 1081.74 84.2987   8
  -7   3  -2 1056.78 77.2165   5
   7   3   2 1112.54 73.1228   7
  -7  -3  -2 889.964 74.7590   6
  -7   3  -2 949.411 75.6720   6
   7  -3   2 1037.50 68.2990   3
  -7  -3  -3 3.07231 5.95910   6
  -7   3  -3-4.87968 6.67063   6
  -7   3  -3-1.69744 7.14212   5
   7  -3   3 2.75727 8.98643   8
   7   3   3 3.51491 5.09649   7
   7   3   3-0.36991 3.09351   3
   7  -3   3 1.11338 2.19757   3
   7   3   4 893.170 47.8799   7
  -7   3  -4 789.071 54.5688   6
  -7  -3  -4 735.457 52.8948   6
   7   3   4 868.023 43.3614   3
  -7   3  -4 791.443 54.3234   5
   7   3   4 886.083 51.6130   5
   7   3   5 191.404 12.8230   3
   7   3   5 152.779 15.1881   7
   7   3   5 163.567 19.6388   5
   7  -3   5 102.106 23.0480   8
  -7  -3  -5 114.400 18.6392   6
  -7   3  -5 149.436 21.0519   6
  -7   3  -5 139.464 20.4816   5
   7   3   6 228.134 19.0058   7
   7   3   6 288.571 28.5643   5
   7  -3   6 250.357 31.4222   8
  -7   3  -6 217.187 26.4883   5
  -7  -3  -6 200.259 26.0503   6
   7   3   7 395.507 29.1171   7
   7  -3   7 353.579 42.6921   8
  -7   3  -7 372.840 38.3462   5
   7  -3   8-12.9921 14.0070   8
  -7  -3  -8 8.03041 11.5449   1
  -7   3  -8-7.01736 9.59759   5
  -7   3  -9 247.914 30.4578   5
   7  -3   9 255.420 34.5164   8
   7  -3  10 90.0423 21.4100   8
  -7   3 -10 90.2430 19.0849   5
   7  -3  11 56.2578 19.9032   8
  -7   3 -11 56.1897 16.6918   5
   7  -3  12 212.981 34.0379   8
  -7  -3 -12 208.746 31.7747   1
  -7   3 -12 254.081 32.7294   5
   7  -3  13 7.01807 14.7730   8
  -7   3 -13 17.8493 15.5916   5
   7   3  13 12.7420 13.5724   8
  -7  -3 -13-3.20081 15.6559   1
   7   3  14 207.026 29.3716   8
  -7  -3 -14 222.396 32.1301   1
   7  -3  14 150.671 29.2853   8
   7  -4 -16 146.457 23.6194   7
   7  -4 -15-2.15331 12.9742   3
   7  -4 -15 18.2253 14.1314   7
  -7  -4  15-3.50914 16.1757   4
  -7   4  15 3.01844 13.9143   4
   7  -4 -14 161.158 22.4502   7
  -7  -4  14 108.605 25.1779   4
  -7   4  14 93.9596 23.3183   4
   7  -4 -13 51.6588 14.7654   7
  -7  -4  13 42.3498 19.5742   4
  -7   4  13 31.9790 15.2873   4
   7  -4 -12 206.816 24.9618   7
  -7  -4  12 160.371 28.4851   4
  -7   4  12 165.805 25.8315   4
   7  -4 -12 245.200 24.7754   3
  -7  -4  11 138.714 24.3557   4
  -7   4  11 132.394 22.6092   4
   7  -4 -11 184.135 20.7770   3
   7  -4 -11 171.189 21.7763   7
   7  -4 -10 10.0734 9.28253   3
  -7  -4  10-5.35473 12.3408   4
  -7   4  10-4.18658 9.84774   4
   7  -4 -10 7.00199 9.60373   7
   7  -4  -9 361.716 33.0079   3
   7  -4  -9 430.093 36.4693   7
  -7  -4   9 342.716 38.4452   4
  -7   4   9 388.031 36.7142   4
  -7  -4   8 67.8864 15.7633   4
  -7   4   8 31.9839 10.8282   4
   7  -4  -8 42.3475 13.5699   8
   7  -4  -8 49.7763 12.7191   7
   7  -4  -8 44.3942 9.98940   3
  -7  -4   7 230.015 25.8867   4
  -7   4   7 197.150 22.6585   4
   7  -4  -7 191.725 20.2785   3
   7  -4  -7 155.885 25.7332   8
   7  -4  -7 248.760 24.6869   7
   7  -4  -6 358.146 40.6118   8
   7   4  -6 377.459 32.5318   1
   7  -4  -6 405.655 32.2479   3
   7  -4  -6 381.970 35.0649   7
  -7  -4   6 388.115 36.9885   4
  -7   4   6 407.340 35.2201   4
   7   4  -5 88.6416 15.3784   7
   7   4  -5 108.113 14.0880   1
   7  -4  -5 101.842 19.7052   8
  -7   4   5 114.109 15.5273   4
   7  -4  -5 95.8980 12.2994   3
  -7  -4   5 111.663 16.9587   4
   7   4  -4 529.731 43.0067   7
   7  -4  -4 533.849 39.0622   3
   7  -4  -3-3.03290 10.2883   8
   7  -4  -3-0.86393 5.01064   3
   7   4  -3 5.59739 7.67684   7
   7  -4  -2 1194.32 100.545   8
   7   4  -2 1195.20 90.3470   7
   7  -4  -2 1323.56 87.0398   3
  -7   4   2 1286.99 94.1833   2
  -7   4   1 144.125 19.1537   2
   7   4  -1 129.658 15.8633   7
   7  -4  -1 116.648 22.5865   8
   7  -4  -1 139.101 12.2796   3
  -7   4   1 97.9228 15.6709   5
  -7   4   0 407.944 37.1505   2
   7   4   0 482.237 34.5268   7
   7  -4   0 370.290 42.3074   8
   7  -4   0 379.562 28.7738   3
  -7   4   0 364.037 35.0107   5
  -7  -4  -1 703.868 59.4397   6
  -7   4  -1 759.483 60.2720   6
  -7   4  -1 816.811 63.7201   2
   7  -4   1 901.225 72.6111   8
   7  -4   1 814.199 54.2165   3
  -7   4  -1 720.717 61.4798   5
   7   4   1 869.793 59.4105   7
   7   4   2 3.99082 6.22781   7
  -7  -4  -2 1.41511 5.80478   6
  -7   4  -2 1.48627 6.40927   6
  -7   4  -2 3.55924 7.10475   5
   7  -4   2-3.14599 11.4642   8
   7  -4   2 3.09224 3.08635   3
   7   4   2 1.43154 3.62183   3
  -7   4  -2 1.85580 7.40879   2
   7   4   3 784.894 51.4970   7
  -7   4  -3 726.457 56.7282   2
   7  -4   3 701.953 46.0706   3
   7   4   3 662.711 47.0524   3
   7  -4   3 712.253 64.0431   8
  -7  -4  -3 611.193 53.1639   6
  -7   4  -3 634.704 54.0713   6
  -7   4  -3 625.083 55.5390   5
   7   4   4 15.0805 7.21191   5
  -7   4  -4 14.1284 8.53872   5
  -7  -4  -4 14.6825 7.41454   6
  -7   4  -4 17.7335 9.02870   6
   7   4   4 16.5931 6.49791   7
  -7   4  -4 13.0697 8.47136   2
   7   4   4 16.2708 4.18580   3
   7  -4   4 12.0624 2.57969   3
  -7   4  -5 134.512 19.9305   2
  -7   4  -5 128.622 19.9441   6
  -7  -4  -5 125.808 18.5128   6
   7   4   5 185.318 13.1047   3
  -7   4  -5 144.890 21.3469   5
   7   4   5 131.632 17.3099   5
  -7   4  -6 295.124 31.9478   5
  -7  -4  -6 265.591 29.1061   6
  -7   4  -6 259.177 30.3395   6
   7  -4   6 265.403 35.2740   8
  -7  -4  -6 288.758 32.5746   1
   7  -4   7 48.8167 16.9715   8
  -7   4  -7 38.1247 13.6189   5
  -7  -4  -7 49.6436 16.1868   1
  -7   4  -8 402.158 38.9513   5
  -7  -4  -8 267.410 35.2943   1
   7  -4   8 344.453 42.0594   8
  -7  -4  -9 20.2617 13.4074   1
   7  -4   9 18.0393 14.8554   8
  -7   4  -9 22.9783 13.0280   5
  -7  -4 -10 344.606 39.5624   1
   7  -4  10 277.616 39.0834   8
  -7   4 -10 358.475 40.1135   5
   7  -4  11 102.185 24.7676   8
  -7   4 -11 111.246 23.2246   5
   7  -4  12 68.2750 20.5616   8
  -7   4 -12 39.6939 18.1912   5
  -7  -4 -13 116.952 24.6333   1
  -7   4 -13 105.885 24.2876   5
   7  -4  13 156.098 28.0600   8
  -7  -4 -14 10.2446 17.0044   1
   7   4  14 15.3379 14.6338   8
   7  -4  14-6.90563 16.2466   8
   7  -5 -16 10.1730 15.2077   7
  -7  -5  15 122.263 28.1673   4
  -7   5  15 84.2582 24.1070   4
  -7  -5  14 10.1595 15.9968   4
  -7   5  14 13.6669 15.2834   4
   7  -5 -14 38.9381 13.7841   7
  -7  -5  13 97.3096 24.7852   4
  -7   5  13 89.2848 21.4182   4
   7  -5 -13 123.111 18.6536   3
   7  -5 -13 141.947 20.4217   7
   7  -5 -12 169.896 21.2841   3
   7  -5 -12 168.872 22.5943   7
  -7  -5  12 123.257 25.6201   4
  -7   5  12 127.400 22.6285   4
   7  -5 -11 73.6408 15.2485   3
  -7  -5  11 69.2975 19.2636   4
  -7   5  11 63.1516 15.4375   4
   7  -5 -11 100.515 16.5992   7
   7  -5 -10 330.024 30.2015   3
   7  -5 -10 261.400 29.0740   7
  -7  -5  10 269.874 33.7607   4
  -7   5  10 262.600 29.7644   4
   7  -5  -9 4.89130 9.33081   3
   7  -5  -9-1.74698 9.44193   7
  -7  -5   9 2.49531 11.7384   4
  -7   5   9-1.85500 8.89909   4
  -7  -5   8 342.925 35.5096   4
  -7   5   8 293.291 31.4895   4
   7  -5  -8 419.257 33.4106   3
   7  -5  -8 335.856 33.1334   7
   7  -5  -7 280.084 33.7870   8
   7  -5  -7 271.848 26.1221   3
   7  -5  -7 265.450 27.9111   7
  -7  -5   7 305.878 31.1648   4
  -7   5   7 263.953 27.1900   4
   7  -5  -6 156.065 25.3722   8
  -7  -5   6 149.319 20.0098   4
  -7   5   6 122.315 17.2393   4
   7  -5  -6 144.243 16.3816   3
   7   5  -6 124.686 15.0248   1
  -7  -5   5 761.032 59.8918   4
  -7   5   5 650.572 56.4995   4
  -7   5   5 793.772 60.6112   2
   7   5  -5 790.424 55.4007   1
   7  -5  -5 687.078 66.1450   8
   7  -5  -5 745.882 54.4174   3
   7  -5  -4 10.7467 5.53355   3
   7  -5  -4 19.4673 12.2504   8
   7   5  -4 23.8832 8.23068   1
   7  -5  -3 892.372 77.0657   8
   7  -5  -3 865.285 61.2067   3
  -7   5   2 71.7216 14.5136   2
   7  -5  -2 61.4695 17.6196   8
   7  -5  -2 45.9376 7.36497   3
  -7   5   1 282.395 29.7012   2
   7  -5  -1 287.132 36.8962   8
   7  -5  -1 270.312 21.6989   3
   7  -5   0 323.024 24.8372   3
   7  -5   0 285.859 38.1924   8
  -7   5   0 361.855 32.8908   5
  -7   5   0 342.559 33.6743   2
  -7   5  -1 78.9615 12.3185   6
  -7   5  -1 57.5838 12.3127   5
   7  -5   1 60.8109 7.17553   3
   7  -5   1 91.2139 20.7654   8
  -7   5  -1 61.4070 13.8393   2
  -7   5  -2 410.695 38.5242   2
   7  -5   2 419.440 28.1322   3
  -7  -5  -2 412.875 34.6030   6
  -7   5  -2 357.472 33.8458   6
   7  -5   2 290.229 40.9535   8
  -7   5  -2 338.719 35.8761   5
  -7  -5  -3 5.87293 7.20851   6
  -7   5  -3 12.7005 7.19400   6
  -7   5  -3 16.8938 9.75591   5
  -7   5  -3 23.0788 10.8321   2
   7  -5   3 9.39792 3.17557   3
   7  -5   3 3.57333 12.5967   8
  -7   5  -4 686.179 57.9195   2
   7   5   4 727.006 52.2992   5
  -7   5  -4 687.232 58.8099   5
  -7   5  -4 713.552 56.1834   6
  -7  -5  -4 640.768 54.3518   6
   7   5   4 759.969 47.8069   3
   7  -5   4 652.313 46.0497   3
  -7   5  -5 98.2956 16.9324   2
  -7   5  -5 107.770 19.0486   5
  -7  -5  -5 101.567 19.2301   1
  -7  -5  -5 119.107 16.8586   6
  -7   5  -5 69.8397 15.0159   6
  -7  -5  -6 122.765 19.1638   6
  -7   5  -6 120.642 20.1715   6
  -7   5  -6 183.760 24.9063   5
  -7   5  -6 116.633 18.5654   2
  -7  -5  -6 141.599 23.1991   1
   7  -5   6 155.641 28.3454   8
  -7   5  -7 369.396 37.0889   2
   7  -5   7 453.293 48.3442   8
  -7   5  -7 472.917 43.8916   5
  -7  -5  -7 359.607 37.7716   6
  -7  -5  -7 379.787 41.0858   1
   7  -5   8 3.75905 13.6975   8
  -7   5  -8-2.99775 11.9660   5
  -7   5  -8 5.59686 9.28803   2
  -7  -5  -8-5.70777 13.4253   1
  -7   5  -9 288.134 35.6285   5
   7  -5   9 244.007 36.4494   8
  -7  -5  -9 264.143 34.5602   1
   7  -5  10 29.9278 16.1588   8
  -7   5 -10 13.2763 13.9995   5
  -7  -5 -10 6.28183 13.8952   1
   7  -5  11 108.206 25.2833   8
  -7   5 -11 86.6373 23.3957   5
  -7  -5 -11 130.863 25.3888   1
  -7   5 -12 86.4541 23.3937   5
   7  -5  12 84.6987 23.1204   8
  -7   5 -13 7.43591 15.6646   5
   7  -5  13 17.9830 15.8923   8
  -7   5 -14 60.7320 22.1593   5
   7  -5  14 75.4295 22.5438   8
   7  -6 -16 79.7903 19.0007   7
  -7  -6  15-24.0085 17.0805   4
  -7   6  15 2.77986 13.5970   4
   7  -6 -15 1.95239 11.7699   7
  -7  -6  14 46.7499 20.2896   4
  -7   6  14 25.9895 16.0654   4
   7  -6 -14 52.4620 16.0507   7
  -7  -6  13 28.8486 17.7188   4
  -7   6  13 24.2620 14.9524   4
   7  -6 -13 34.0185 12.4787   3
   7  -6 -13 47.2383 15.4247   7
  -7  -6  12 15.2376 14.1501   4
  -7   6  12 22.3668 13.0843   4
   7  -6 -12 30.8369 11.4580   3
   7  -6 -12 34.1161 12.5990   7
  -7  -6  11 172.702 27.0424   4
  -7   6  11 157.499 22.5067   4
   7  -6 -11 177.105 20.4742   3
   7  -6 -11 179.194 22.8133   7
   7  -6 -10 11.0292 10.5248   7
  -7  -6  10 5.38746 11.6184   4
  -7   6  10 13.4450 10.8473   4
   7  -6 -10-2.72171 8.40205   3
   7  -6  -9 544.512 45.1552   3
  -7  -6   9 593.102 52.5980   4
  -7   6   9 544.838 47.7246   4
   7  -6  -9 624.035 49.4462   7
   7  -6  -8 7.13917 9.05612   7
   7  -6  -8 5.89298 7.69819   3
  -7  -6   8 4.58197 9.88972   4
  -7   6   8 13.2157 8.66756   4
  -7  -6   7 267.538 30.0613   4
  -7   6   7 256.739 26.7808   4
  -7   6   7 297.852 30.2203   2
   7  -6  -7 296.683 25.7833   3
  -7  -6   6 163.117 24.2131   4
  -7   6   6 215.087 23.6977   4
  -7   6   6 306.449 28.4319   2
   7  -6  -6 264.346 22.4376   3
   7  -6  -5 141.830 15.1904   3
  -7   6   5 134.557 19.6311   2
   7  -6  -5 150.357 26.7591   8
   7  -6  -4 390.522 44.3446   8
   7  -6  -4 365.120 29.6550   3
   7  -6  -3 5.34496 4.93705   3
   7  -6  -2 228.917 18.1379   3
  -7   6   2 161.814 23.8983   2
   7  -6  -2 161.233 28.6770   8
  -7   6   2 171.280 21.7878   5
   7  -6  -1 141.082 13.0764   3
   7  -6  -1 100.431 24.5594   8
  -7   6   1 139.925 21.1119   2
   7  -6   0 67.6380 8.22632   3
  -7   6   0 59.6867 14.5601   2
   7  -6   0 52.3764 19.4069   8
   7  -6   1 628.401 63.9663   8
   7  -6   1 675.934 46.6178   3
  -7   6  -1 642.202 55.4911   5
  -7   6  -1 666.233 57.3838   2
  -7  -6  -2-1.33675 6.65527   6
  -7   6  -2 5.65564 6.38003   6
  -7   6  -2 4.35799 8.93631   5
  -7   6  -2-2.30716 9.70768   2
   7  -6   2 3.82130 13.9244   8
   7  -6   2 0.43986 3.25925   3
  -7  -6  -3 800.945 64.6055   6
  -7   6  -3 826.196 65.4859   6
  -7   6  -3 830.776 70.0598   2
   7  -6   3 903.609 58.2149   3
   7  -6   3 937.193 80.3535   8
  -7   6  -3 746.976 68.9585   5
   7   6   4 76.6065 11.2190   5
  -7   6  -4 88.6210 17.7105   5
  -7  -6  -4 66.9343 15.9176   1
   7  -6   4 84.8157 7.46684   3
  -7   6  -4 77.5641 16.8350   2
  -7  -6  -4 50.4593 12.0114   6
  -7   6  -4 66.7354 13.8820   6
  -7   6  -5 369.966 39.5876   2
  -7   6  -5 408.317 42.2019   5
  -7  -6  -5 380.393 36.0907   6
  -7   6  -5 450.464 38.7722   6
  -7  -6  -5 405.663 41.1243   1
  -7  -6  -6 171.662 25.3731   1
  -7   6  -6 202.567 27.3076   5
   7  -6   6 132.027 27.0590   8
  -7   6  -6 161.370 22.1802   6
  -7  -6  -6 145.095 20.3815   6
  -7   6  -6 154.916 22.3080   2
  -7  -6  -7 47.2490 15.4248   1
  -7   6  -7 64.9147 18.2227   5
   7  -6   7 54.4730 19.8580   8
  -7  -6  -7 85.6671 16.1916   6
  -7   6  -7 93.1106 18.5813   6
  -7   6  -7 65.4679 15.2033   2
  -7   6  -8 61.8298 20.3309   5
  -7   6  -8 73.4320 15.5760   2
  -7  -6  -8 97.2810 21.9359   1
   7  -6   8 46.9066 18.9147   8
  -7   6  -9 20.5014 14.5418   5
  -7   6  -9 39.8863 12.9120   2
   7  -6   9 38.8306 18.3968   8
  -7  -6  -9 37.2876 16.1607   1
   7  -6  10 111.852 26.4540   8
  -7  -6 -10 159.568 27.4409   1
  -7   6 -10 114.345 26.4703   5
   7  -6  11 125.580 27.1484   8
  -7  -6 -11 64.6031 21.0086   1
  -7   6 -11 89.3094 22.3114   5
   7  -6  12 14.7668 17.0167   8
  -7  -6 -12 7.06039 16.9367   1
  -7   6 -12-7.71713 16.6371   5
  -7   6 -13 123.179 29.8829   5
   7  -6  13 213.089 33.0581   8
  -7   6 -14 4.06141 19.1073   5
   7  -7 -15 165.491 24.5672   7
   7  -7 -14 25.4155 14.1870   7
  -7  -7  14 16.2404 16.2215   4
  -7   7  14 17.2422 14.7132   4
   7  -7 -13 168.396 22.6272   3
   7  -7 -13 218.261 26.2021   7
  -7  -7  13 141.329 27.3605   4
  -7   7  13 176.362 25.4711   4
   7  -7 -12 72.3435 16.1506   7
   7  -7 -12 59.0931 13.4057   3
  -7  -7  12 39.0317 17.7151   4
  -7   7  12 34.1136 13.2508   4
   7  -7 -11 120.586 19.3285   7
   7  -7 -11 98.5740 16.2809   3
  -7  -7  11 79.5300 20.8705   4
  -7   7  11 104.936 17.9966   4
   7  -7 -10 84.5493 16.7361   7
   7  -7 -10 88.4388 14.1207   3
  -7  -7  10 81.2286 18.3559   4
  -7   7  10 69.3775 14.3864   4
   7  -7  -9-1.87703 9.34509   7
   7  -7  -9-3.87885 7.69402   3
  -7  -7   9-7.37301 11.0896   4
  -7   7   9 8.50362 8.76454   4
   7  -7  -8 76.9161 12.9136   3
  -7   7   8 108.392 18.1534   2
   7  -7  -8 52.3600 15.0951   7
  -7  -7   8 91.2509 17.4520   4
  -7   7   8 65.3362 13.5339   4
  -7  -7   7 84.6918 17.1253   4
  -7   7   7 83.8053 14.4925   4
  -7   7   7 88.1119 17.3658   2
   7  -7  -7 106.593 13.7159   3
  -7   7   6 60.2135 14.3681   2
   7  -7  -6 52.4341 9.60283   3
  -7  -7   6 53.8893 13.4827   4
  -7   7   6 23.0862 9.72727   4
  -7   7   5 566.328 49.3085   2
   7  -7  -5 550.551 42.3867   3
   7  -7  -4 7.07154 6.18075   3
  -7   7   4 4.34479 10.2272   2
   7  -7  -3 1535.40 125.846   8
   7  -7  -3 1522.19 106.666   3
  -7   7   3 1696.22 114.143   5
  -7   7   2 11.1854 9.77625   5
  -7   7   2 4.61764 9.96492   2
   7  -7  -2 7.76435 14.6171   8
   7  -7  -2 6.59214 5.13124   3
  -7   7   1 670.742 58.5122   2
   7  -7  -1 727.684 68.5671   8
   7  -7  -1 678.736 48.0646   3
  -7   7   1 620.296 55.0881   5
   7  -7   0 93.6768 10.5762   3
  -7   7   0 113.719 20.9159   2
   7  -7   0 76.4644 23.5215   8
  -7   7  -1 149.905 22.7685   2
   7  -7   1 105.079 25.6268   8
   7  -7   1 139.799 12.7811   3
  -7   7  -2 303.123 34.7426   2
   7  -7   2 318.392 23.1733   3
  -7   7  -2 258.346 31.5147   5
  -7   7  -2 274.730 27.6675   6
   7  -7   2 332.895 42.4844   8
  -7   7  -3 63.1100 12.1238   6
  -7  -7  -3 69.8393 12.0512   6
  -7   7  -3 46.6206 15.6435   5
  -7   7  -3 63.2484 16.4659   2
   7  -7   3 44.8233 20.7512   8
   7  -7   3 75.9043 7.88874   3
  -7   7  -4 244.953 25.8571   6
  -7  -7  -4 258.128 25.1862   6
   7   7   4 239.669 22.1762   5
  -7   7  -4 257.691 32.2749   5
  -7  -7  -4 240.534 29.2822   1
  -7   7  -4 220.093 30.4158   2
  -7   7  -5 173.244 21.6920   6
  -7  -7  -5 176.175 20.7500   6
  -7  -7  -5 190.527 25.3385   1
  -7   7  -5 153.744 25.2586   2
  -7   7  -5 156.909 26.6481   5
  -7   7  -6 7.83137 11.6589   2
  -7   7  -6 28.5438 13.4647   5
  -7  -7  -6 33.2225 10.8117   6
  -7   7  -6 59.0512 14.9478   6
  -7  -7  -6 34.7468 14.1159   1
   7  -7   6 12.2131 14.4432   8
  -7  -7  -7 483.636 47.6206   1
  -7   7  -7 441.006 47.4674   5
  -7  -7  -7 438.375 40.9578   6
  -7   7  -7 419.417 42.2943   6
  -7   7  -7 471.258 44.7015   2
   7  -7   7 398.323 50.2152   8
  -7   7  -8-4.86707 10.9980   2
  -7  -7  -8 21.5424 11.1187   6
  -7   7  -8 24.6722 12.5159   6
  -7   7  -8 24.4864 17.4260   5
  -7  -7  -8 6.07632 13.4216   1
   7  -7   8 4.04302 13.7290   8
   7  -7   9 354.085 47.4562   8
  -7  -7  -9 311.166 41.3535   1
  -7   7  -9 475.095 48.8261   5
  -7   7  -9 402.409 39.2376   2
  -7  -7 -10 6.74987 15.2283   1
  -7   7 -10 3.80684 14.7677   5
   7  -7  10-3.89171 14.6461   8
  -7  -7 -11 148.367 28.6288   1
  -7   7 -11 130.395 28.7856   5
   7  -7  11 109.974 26.5511   8
  -7   7 -12 4.08377 16.7944   5
  -7  -7 -12 40.4060 19.5899   1
  -7   7 -13 12.5818 19.7456   5
  -7   7 -14 17.1114 19.3334   5
  -7  -8  14 9.45737 18.0465   4
  -7   8  14 4.65237 12.7690   4
   7  -8 -14 7.97361 13.0011   7
  -7  -8  13 67.1753 19.9731   4
  -7   8  13 99.9910 19.1368   4
   7  -8 -13 117.106 19.9992   7
   7  -8 -13 88.4709 17.0249   3
  -7  -8  12 8.71715 15.4775   4
  -7   8  12 6.08455 11.1443   4
   7  -8 -12 17.6471 12.1134   7
   7  -8 -12 7.88524 9.97309   3
  -7   8  11 128.886 20.7419   4
  -7  -8  11 169.655 26.7359   4
   7  -8 -11 217.439 25.6015   7
   7  -8 -11 180.430 20.9550   3
  -7  -8  10 5.16252 11.6493   4
  -7   8  10 5.23934 9.99751   4
   7  -8 -10 3.91247 11.4963   7
   7  -8 -10 1.40512 8.96926   3
  -7  -8   9 336.749 39.8170   4
  -7   8   9 363.081 36.3548   4
  -7   8   9 487.700 41.4073   2
   7  -8  -9 523.646 42.4073   7
   7  -8  -9 428.341 36.3272   3
  -7   8   8 27.2079 12.4908   2
  -7  -8   8 31.4321 12.5336   4
  -7   8   8 6.21415 9.17842   4
   7  -8  -8 9.92437 7.97428   3
   7  -8  -7 219.099 21.7414   3
  -7   8   7 201.665 22.6187   4
  -7  -8   7 196.589 25.4484   4
  -7   8   7 224.461 27.0206   2
   7  -8  -6 60.4550 10.6669   3
  -7   8   6 44.6720 14.8405   2
   7  -8  -5 104.884 13.7307   3
  -7   8   5 121.721 20.1172   2
   7  -8  -4 76.1589 11.1001   3
  -7   8   4 52.3053 15.8045   2
   7  -8  -3 39.4047 8.15113   3
  -7   8   3 41.8762 12.2884   5
   7  -8  -2 16.0638 6.71632   3
  -7   8   2 23.0526 13.2424   2
  -7   8   2 14.0767 9.88878   5
   7  -8  -1 131.717 28.8084   8
  -7   8   1 177.718 23.8534   5
   7  -8  -1 199.889 17.8927   3
   7  -8   0 31.8811 6.73877   3
  -7   8   0 15.8432 11.2200   5
   7  -8   0 37.5209 18.0704   8
  -7   8   0 30.3370 13.6104   2
   7  -8   1 456.208 33.8643   3
   7  -8   1 473.738 53.8848   8
  -7   8  -1 440.690 45.7312   2
   7  -8   2 6.35856 4.88806   3
   7  -8   2 4.25315 13.8700   8
  -7   8  -2 17.4089 12.5188   2
  -7  -8  -3 812.055 66.1154   1
  -7   8  -3 717.314 68.8713   2
   7  -8   3 818.708 78.2551   8
  -7  -8  -3 850.181 61.4917   6
  -7   8  -3 792.744 61.5538   6
  -7   8  -3 818.897 70.0247   5
   7  -8   3 807.773 55.8075   3
  -7  -8  -4 23.0939 13.5895   1
  -7   8  -4 15.3841 12.3043   5
  -7  -8  -4 12.7446 7.91742   6
  -7   8  -4 3.19244 8.91618   6
  -7   8  -4 11.9669 13.5197   2
  -7   8  -5 236.585 26.6419   6
  -7  -8  -5 283.355 26.2144   6
  -7   8  -5 222.446 32.5243   2
  -7  -8  -5 258.201 31.5146   1
  -7   8  -5 217.541 32.9592   5
  -7   8  -6 6.83105 13.2791   5
  -7   8  -6 8.82774 12.7178   2
  -7  -8  -6 24.6550 15.2737   1
  -7  -8  -6 23.3537 10.0883   6
  -7   8  -6 5.85602 9.92967   6
   7  -8   6 16.7073 17.5965   8
  -7   8  -7 64.3412 21.1401   5
  -7   8  -7 80.0014 19.4534   2
  -7  -8  -7 41.1594 17.1043   1
  -7  -8  -7 89.4190 15.7179   6
  -7   8  -7 49.8573 14.5814   6
   7  -8   7 66.1440 22.3876   8
  -7   8  -8 11.1945 18.2857   5
  -7   8  -8 10.9435 14.1545   2
  -7  -8  -8 40.6370 16.6843   1
  -7  -8  -8 22.3777 12.4678   6
  -7   8  -8 11.8844 11.4720   6
   7  -8   8 32.5314 19.9195   8
  -7   8  -9-3.88420 18.3043   5
  -7   8  -9 28.3063 14.3644   2
  -7  -8  -9 31.4135 13.3958   6
  -7   8  -9 12.8814 13.3205   6
  -7  -8  -9 16.5830 16.5473   1
   7  -8   9 20.1102 16.5303   8
  -7  -8 -10 24.5007 17.7393   1
  -7   8 -10-4.03090 17.7939   5
  -7  -8 -11 58.7383 21.3230   1
  -7   8 -11 54.1749 22.1316   5
  -7  -8 -12 15.3041 18.3565   1
  -7   8 -12-4.28759 19.3477   5
  -7   8 -13 197.354 37.2488   5
   7  -9 -14 5.95628 14.1069   7
  -7  -9  14-6.00222 14.6755   4
  -7   9  14 13.1644 12.7294   4
   7  -9 -13 99.6167 19.4161   7
  -7  -9  13 66.5991 20.1903   4
  -7   9  13 83.7626 17.4994   4
   7  -9 -12 37.0988 13.3064   3
   7  -9 -12 29.8962 14.4738   7
  -7   9  12 18.9223 12.0273   4
  -7  -9  12 2.78904 13.9581   4
   7  -9 -11 105.574 16.9506   3
  -7  -9  11 66.0766 18.2581   4
  -7   9  11 76.7885 15.9174   4
   7  -9 -11 93.4825 18.4939   7
   7  -9 -10 26.0301 10.4363   3
  -7  -9  10 14.9719 12.5590   4
  -7   9  10 36.7647 12.0128   4
   7  -9 -10 28.1716 14.1611   7
  -7   9  10 42.6250 15.6411   2
  -7   9   9 8.72144 11.7876   2
   7  -9  -9 2.71990 9.14182   3
  -7  -9   9 7.01171 11.8452   4
  -7   9   9 1.58488 9.89500   4
  -7   9   8 20.4583 12.1160   2
  -7   9   8 10.5245 8.51276   4
  -7  -9   8-10.7086 10.2956   4
   7  -9  -8 26.6646 10.1580   3
  -7   9   7 135.574 23.0469   2
   7  -9  -7 184.799 18.9391   3
  -7   9   6 7.22452 12.2276   2
   7  -9  -6 14.3518 7.31501   3
  -7   9   5 449.147 45.6064   2
   7  -9  -5 504.446 38.8926   3
  -7   9   4 2.61504 11.2746   2
   7  -9  -4-0.98662 6.62898   3
  -7   9   3 733.907 62.7177   5
   7  -9  -3 796.689 56.7957   3
  -7   9   2 8.68060 9.79772   5
   7  -9  -2 10.4037 6.58488   3
  -7   9   2-11.3339 11.6249   2
  -7   9   1 257.274 32.4858   2
  -7   9   1 248.085 28.9090   5
   7  -9  -1 235.696 21.1121   3
  -7   9   0 52.5156 18.2282   2
   7  -9   0 78.0752 9.87541   3
  -7   9   0 56.4743 14.5550   5
  -7   9  -1 111.133 24.0444   2
  -7   9  -1 131.538 23.5134   5
   7  -9   1 156.968 14.4642   3
   7  -9   2 49.1504 8.51863   3
  -7   9  -2 12.9493 15.4583   2
  -7  -9  -3 8.47029 11.1107   1
  -7   9  -3 9.26774 13.0136   5
   7  -9   3 9.87668 5.42303   3
  -7   9  -3 13.1658 15.8029   2
  -7   9  -4 13.3011 15.3703   5
  -7   9  -4 28.2143 10.1411   6
  -7  -9  -4 14.6632 8.30524   6
  -7  -9  -4 14.1035 12.1683   1
  -7   9  -4 16.6633 16.0298   2
  -7   9  -5 111.514 24.5551   5
  -7  -9  -5 139.280 17.6351   6
  -7   9  -5 121.545 18.5393   6
  -7  -9  -5 191.136 26.1628   1
  -7   9  -5 130.167 25.2643   2
  -7   9  -6 7.30700 13.7516   5
  -7   9  -6-6.53701 14.0941   2
  -7  -9  -6 9.37820 8.94845   6
  -7   9  -6 1.84018 8.99952   6
  -7  -9  -6 8.41246 14.6912   1
  -7   9  -7 305.607 31.3789   6
  -7  -9  -7 268.047 28.1694   6
  -7  -9  -7 216.637 33.1043   1
  -7   9  -7 285.587 39.4607   5
  -7   9  -7 235.109 33.5622   2
  -7   9  -8 3.95798 17.4679   5
  -7  -9  -8 5.66211 10.2036   6
  -7   9  -8 6.74709 12.1578   6
  -7  -9  -8-3.22536 15.7698   1
  -7   9  -8 3.04421 12.8110   2
  -7   9  -9 188.844 34.9558   5
  -7  -9  -9 241.004 28.1867   6
  -7   9  -9 262.796 31.4169   6
  -7  -9  -9 188.857 32.2864   1
  -7   9  -9 220.462 30.6650   2
  -7   9 -10-17.1431 18.9129   5
  -7  -9 -10-3.63526 18.0981   1
  -7  -9 -10 11.5941 12.1471   6
  -7   9 -10 2.64054 13.6074   6
  -7   9 -11 97.0551 27.7572   5
  -7  -9 -11 95.5327 26.3286   1
  -7  -9 -11 119.469 22.2041   6
  -7   9 -12-13.5502 21.2654   5
  -7 -10  13 30.2326 15.7290   4
   7 -10 -13 51.6753 16.9239   7
  -7 -10  12 13.2452 14.8167   4
   7 -10 -12 32.3323 15.0411   7
   7 -10 -11 172.999 21.4118   3
   7 -10 -11 211.809 26.3426   7
  -7 -10  10 35.7234 14.4275   4
  -7  10  10 16.1299 10.0668   4
  -7  10  10 29.3717 14.0218   2
   7 -10 -10 18.6646 14.1518   7
   7 -10 -10 24.9828 10.9052   3
  -7  10   9 373.022 37.1255   2
   7 -10  -9 386.621 31.3615   3
  -7  10   9 257.742 29.2525   4
  -7 -10   9 282.558 33.6738   4
   7 -10  -8 10.5988 9.12116   3
  -7  10   8 21.8760 12.9692   2
   7 -10  -7 124.218 16.2879   3
  -7  10   7 125.850 21.1177   2
   7 -10  -6 33.0968 10.2143   3
  -7  10   6 28.8939 13.9098   2
   7 -10  -5 81.9044 12.6912   3
  -7  10   5 63.0224 18.1584   2
  -7  10   4 57.4271 15.3338   5
   7 -10  -4 71.0562 12.2830   3
  -7  10   4 46.0800 16.5049   2
   7 -10  -3 1.92539 6.47841   3
  -7  10   3 15.1195 10.3682   5
  -7  10   2 36.9766 14.6068   5
  -7  10   2 37.9944 16.0790   2
   7 -10  -2 59.4257 10.3079   3
  -7  10   1 210.006 31.9031   2
  -7  10   1 226.577 28.0317   5
   7 -10  -1 201.356 19.1806   3
  -7  10   0 21.1054 12.4982   5
  -7  10   0 26.9947 16.2552   2
   7 -10   0 22.7682 7.32739   3
  -7  10  -1 405.442 48.1620   2
  -7  10  -1 459.379 46.4034   5
   7 -10   1 467.487 34.8927   3
   7 -10   2 7.36030 6.23976   3
  -7  10  -2-3.52740 14.4691   2
  -7  10  -3 483.341 54.3500   2
  -7 -10  -3 493.029 47.5946   1
   7 -10   3 555.897 39.5546   3
  -7  10  -4 14.4744 16.3313   2
  -7  10  -4 3.55512 15.6924   5
  -7 -10  -4 2.38179 11.8628   1
  -7  10  -5 214.347 22.9852   6
  -7 -10  -5 191.381 21.0279   6
  -7 -10  -5 181.031 27.9021   1
  -7  10  -5 182.641 31.8070   5
  -7  10  -5 224.125 33.5142   2
  -7  10  -6 17.8344 18.0720   2
  -7  10  -6-7.77222 17.9118   5
  -7 -10  -6-2.86010 15.6906   1
  -7 -10  -6-5.86567 8.72608   6
  -7  10  -6 8.54644 8.95420   6
  -7  10  -7 27.8250 17.5174   2
  -7  10  -7 20.1735 18.7845   5
  -7 -10  -7 55.5694 19.0094   1
  -7 -10  -7 44.5371 12.3531   6
  -7  10  -7 49.0751 14.1208   6
  -7  10  -8 30.0178 16.4386   2
  -7  10  -8 25.0755 17.7080   5
  -7 -10  -8 23.2380 18.3312   1
  -7 -10  -8 26.2312 12.2694   6
  -7  10  -8 54.0020 14.6418   6
  -7  10  -9 25.0459 17.1981   2
  -7  10  -9-4.31525 18.1783   5
  -7 -10  -9 23.1290 11.9242   6
  -7  10  -9 13.5866 12.8135   6
  -7 -10  -9 3.54560 16.0227   1
  -7  10 -10-4.48297 19.8169   5
  -7 -10 -10 41.3973 20.9793   1
  -7  10 -10 19.7790 13.4127   6
  -7  10 -11 73.8461 19.6442   6
  -7  10 -12 2.77486 14.5368   6
   7 -11 -12 6.11084 14.8498   7
   7 -11 -11 44.1768 17.1572   7
  -7  11  11 25.3992 14.0709   2
   7 -11 -10 6.14522 11.7483   3
   7 -11 -10-2.14951 13.5712   7
  -7  11  10 14.3948 12.9717   2
   7 -11  -9 5.84079 10.5607   3
  -7  11   9 7.54201 13.3865   2
   7 -11  -8 51.5962 12.3135   3
  -7  11   8 5.20069 12.8528   2
   7 -11  -7 134.508 18.0803   3
  -7  11   7 155.109 25.9212   2
   7 -11  -6 36.5404 11.0592   3
  -7  11   6 22.7385 15.7288   2
   7 -11  -5 206.815 21.4470   3
  -7  11   5 212.070 30.8844   2
  -7  11   4 31.3422 16.7075   2
   7 -11  -4 10.9071 7.73689   3
  -7  11   4 15.0609 11.3100   5
  -7  11   3 350.131 35.4350   5
   7 -11  -3 311.929 27.9354   3
  -7  11   2 10.2957 17.3999   2
   7 -11  -2 22.2468 8.41494   3
  -7  11   2-4.92662 10.3847   5
  -7  11   1 191.830 31.3785   2
  -7  11   1 168.242 25.6047   5
   7 -11  -1 183.033 18.3538   3
  -7  11   0 32.8005 19.1778   2
   7 -11   0 27.4830 8.07680   3
  -7  11   0 28.3139 14.7038   5
  -7  11  -1 67.1128 23.2872   2
  -7  11  -1 94.2960 21.9099   5
   7 -11   1 102.122 12.3503   3
   7 -11   2 46.7044 9.32275   3
  -7  11  -2 49.5844 17.4910   5
  -7 -11  -3 12.8198 11.9078   1
  -7  11  -3 3.85301 15.8127   2
  -7 -11  -4 47.9797 16.9141   1
  -7  11  -4 27.0520 17.2262   2
  -7  11  -5 42.4084 19.8941   2
  -7  11  -5 59.3345 20.7302   5
  -7 -11  -5 55.7364 18.5663   1
  -7  11  -5 65.6528 12.6220   6
  -7  11  -6-3.82479 16.0940   2
  -7  11  -6-4.11063 17.2966   5
  -7  11  -6 6.12109 8.75946   6
  -7 -11  -6 5.81323 16.1794   1
  -7  11  -7 192.316 22.9415   6
  -7 -11  -7 185.661 30.2235   1
  -7  11  -7 106.383 29.4561   5
  -7  11  -7 108.300 27.8794   2
  -7  11  -8 14.3222 18.1475   2
  -7  11  -8-4.38787 19.3693   5
  -7 -11  -8-6.80165 16.3221   1
  -7  11  -8 15.0275 10.7610   6
  -7  11  -9 67.6403 28.7359   5
  -7  11  -9 123.900 21.3258   6
  -7 -11  -9 134.954 28.6957   1
   7 -12 -11 87.7582 19.8216   7
  -7  12  10 23.1018 14.7650   2
  -7  12   9 106.909 22.5616   2
   7 -12  -8 2.82617 10.1251   3
  -7  12   8-2.77730 13.8267   2
   7 -12  -7 73.2694 14.3632   3
  -7  12   7 99.6528 21.4628   2
   7 -12  -6 37.0035 11.2337   3
  -7  12   6 30.8730 17.0878   2
   7 -12  -5 24.1562 10.2332   3
  -7  12   5 58.2722 20.0725   2
   7 -12  -4 64.9404 12.7387   3
  -7  12   4 95.8014 23.4398   2
  -7  12   4 70.0618 17.2265   5
   7 -12  -3 2.15881 8.12669   3
  -7  12   3 4.84729 11.6287   5
   7 -12  -2 115.515 15.0030   3
  -7  12   2 115.018 21.1754   5
   7 -12  -1 73.2463 12.0126   3
  -7  12   1 53.5178 21.4112   2
  -7  12   1 61.2448 18.0927   5
   7 -12   0 53.8383 10.7235   3
  -7  12   0 62.5729 23.2884   2
  -7  12   0 75.1091 19.9466   5
  -7  12  -1 177.699 30.1095   5
   7 -12   1 210.045 19.3060   3
  -7  12  -1 131.873 29.9681   2
   7 -12   2 8.18293 7.55828   3
  -7  12  -2-4.04489 17.8512   2
  -7  12  -2-6.94888 14.6206   5
  -7 -12  -3 165.651 24.6487   1
  -7  12  -3 183.572 32.5038   2
  -7  12  -3 189.266 33.6223   5
  -7 -12  -4 14.3750 14.2563   1
  -7  12  -4-12.2972 18.0889   2
  -7 -12  -5 58.7070 19.1260   1
  -7  12  -5 122.282 28.1099   2
  -7 -12  -6 46.9557 20.0493   1
  -7  12  -6 36.2810 19.1092   2
  -7  12  -6 25.9694 20.4965   5
  -7 -12  -7 89.4757 23.2179   1
  -7  12  -7 55.1141 21.3023   2
  -7  12  -7 40.1607 20.9242   5
  -7 -12  -8 34.6182 19.4609   1
  -7  12  -8 52.8630 22.6332   2
  -7  12  -9 21.3360 18.6782   2
  -7  13   7 78.2461 22.3921   2
   7 -13  -7 76.2421 14.9503   3
  -7  13   6 59.4355 22.4814   2
   7 -13  -6 80.2716 14.8524   3
  -7  13   5 83.3171 24.3125   2
   7 -13  -5 115.760 16.2992   3
  -7  13   4 2.35469 11.7229   5
   7 -13  -4 5.99129 9.15900   3
  -7  13   4-11.0188 19.2402   2
  -7  13   3 142.099 23.4118   5
   7 -13  -3 138.259 17.3760   3
   7 -13  -2 5.58459 8.60892   3
  -7  13   2 5.49602 14.1655   5
   7 -13  -1 55.8138 11.5819   3
  -7  13   1 52.8841 21.9671   2
  -7  13   1 67.4674 19.8654   5
   7 -13   0 78.6361 12.6097   3
  -7  13   0 45.7252 21.9460   2
  -7  13   0 85.6651 20.8005   5
   7 -13   1 8.11856 8.00398   3
  -7  13  -1-4.23644 18.2721   2
  -7  13  -1 17.0644 16.3804   5
  -7  13  -2 72.6310 24.7582   2
  -7  13  -2 51.3754 21.3585   5
  -7  13  -3 12.8881 18.0998   2
  -7  13  -3 15.9731 17.6466   5
  -7 -13  -4 21.3613 13.8759   1
  -7  13  -4 42.9969 25.6444   2
  -7  13  -4 29.4846 19.4926   5
  -7 -13  -5 31.9319 16.9127   1
  -7  13  -5 29.7885 19.3048   2
  -7 -13  -6 23.5332 17.8010   1
  -7  13  -6 29.3258 19.7794   2
  -7 -13  -7 32.1899 18.3713   1
  -7  13  -7 61.2006 25.6059   2
  -7  13  -8-15.7349 19.9562   2
   7 -14  -5 18.6854 10.3486   3
   7 -14  -4 75.9108 14.5303   3
  -7  14   4 80.4914 18.0335   5
   7 -14  -3 2.45736 8.73001   3
  -7  14   3 5.28162 13.6102   5
  -7  14   2 125.672 24.3112   5
   7 -14  -2 152.332 18.2356   3
  -7  14   1 91.7304 21.5780   5
  -7  14   1 47.1153 24.7306   2
   7 -14  -1 85.9160 13.8438   3
  -7  14   0 112.231 25.0049   5
   7 -14   0 117.205 15.4168   3
  -7  14   0 61.0742 26.2048   2
  -7  14  -1 26.5975 23.2248   2
  -7  14  -1 88.9982 22.6086   5
   7 -14   1 68.5655 12.5386   3
  -7  14  -2-7.62876 17.2190   5
  -7  14  -2-8.97985 20.2659   2
  -7  15   4 14.9971 14.5286   5
  -7  15   3 18.9767 15.1388   5
   7 -15  -2 28.0621 11.8358   3
   7 -15  -1 11.1092 10.2814   3
   7 -15   0 37.6661 11.9625   3
  -8   0  14-9.76203 16.7802   4
   8   0 -13-8.10050 11.2719   3
   8   0 -13 4.50148 12.7054   7
  -8   0  13 6.18289 13.3286   4
  -8   0  12 206.713 31.2100   4
   8   0 -12 228.142 28.1019   3
   8   0 -12 300.472 31.0772   7
   8   0 -11-1.96146 10.6014   3
  -8   0  11 10.9507 12.0813   4
[truncated: 115,483 more chars]
