# Supplementary material for: The Solvent Effect on Composition and Dimensionality of Mercury(II) Complexes with Picolinic Acid
Source: Molecules. 2021 Aug 18;26(16):5002. doi: 10.3390/molecules26165002 (PMC8400068; doi:10.3390/molecules26165002)
Supplement: Supplementary file 1 [file molecules-26-05002-s001.zip › 3.cif]

 
data_3
 
_audit_creation_method            'SHELXL-2018/3'
_shelx_SHELXL_version_number      '2018/3'
_chemical_name_systematic         ?
_chemical_name_common             ?
_chemical_melting_point           ?
_chemical_formula_moiety          ?
_chemical_formula_sum
 'C12 H9 Br Hg N2 O4' 
_chemical_formula_weight          525.71

loop_
 _atom_type_symbol
 _atom_type_description
 _atom_type_scat_dispersion_real
 _atom_type_scat_dispersion_imag
 _atom_type_scat_source
 'C'  'C'   0.0033   0.0016
 'International Tables Vol C Tables 4.2.6.8 and 6.1.1.4'
 'H'  'H'   0.0000   0.0000
 'International Tables Vol C Tables 4.2.6.8 and 6.1.1.4'
 'Br'  'Br'  -0.2901   2.4595
 'International Tables Vol C Tables 4.2.6.8 and 6.1.1.4'
 'Hg'  'Hg'  -2.3894   9.2266
 'International Tables Vol C Tables 4.2.6.8 and 6.1.1.4'
 'N'  'N'   0.0061   0.0033
 'International Tables Vol C Tables 4.2.6.8 and 6.1.1.4'
 'O'  'O'   0.0106   0.0060
 'International Tables Vol C Tables 4.2.6.8 and 6.1.1.4'
 
_space_group_crystal_system       monoclinic
_space_group_IT_number            14
_space_group_name_H-M_alt         'P 21/c'
_space_group_name_Hall            '-P 2ybc'
 
_shelx_space_group_comment
;
The symmetry employed for this shelxl refinement is uniquely defined
by the following loop, which should always be used as a source of
symmetry information in preference to the above space-group names.
They are only intended as comments.
;
 
loop_
 _space_group_symop_operation_xyz
 'x, y, z'
 '-x, y+1/2, -z+1/2'
 '-x, -y, -z'
 'x, -y-1/2, z-1/2'
 
_cell_length_a                    9.1223(4)
_cell_length_b                    11.6466(6)
_cell_length_c                    13.1976(6)
_cell_angle_alpha                 90
_cell_angle_beta                  92.073(4)
_cell_angle_gamma                 90
_cell_volume                      1401.25(11)
_cell_formula_units_Z             4
_cell_measurement_temperature     170(2)
_cell_measurement_reflns_used     11487
_cell_measurement_theta_min       3.1000
_cell_measurement_theta_max       33.4290
 
_exptl_crystal_description        'prism'
_exptl_crystal_colour             'colorless'
_exptl_crystal_density_meas       ?
_exptl_crystal_density_method     ?
_exptl_crystal_density_diffrn     2.492          
_exptl_crystal_F_000              968
_exptl_transmission_factor_min    ?
_exptl_transmission_factor_max    ?
_exptl_crystal_size_max           ?
_exptl_crystal_size_mid           ?
_exptl_crystal_size_min           ?
_exptl_absorpt_coefficient_mu     13.848
_shelx_estimated_absorpt_T_min    ?
_shelx_estimated_absorpt_T_max    ?
_exptl_absorpt_correction_type    multi-scan
_exptl_absorpt_correction_T_min   0.22409
_exptl_absorpt_correction_T_max   1.00000
_exptl_absorpt_process_details    
;
CrysAlisPro 1.171.41.92a (Rigaku Oxford Diffraction, 2020)
Empirical absorption correction using spherical harmonics,
implemented in SCALE3 ABSPACK scaling algorithm.
;
_exptl_absorpt_special_details    ?
_diffrn_ambient_temperature       170(2)
_diffrn_radiation_wavelength      0.71073
_diffrn_radiation_type            MoK\a
_diffrn_source                    ?
_diffrn_measurement_device_type   'XtaLAB Synergy, Dualflex, HyPix'
_diffrn_measurement_method        '\w scans'
_diffrn_detector_area_resol_mean  ?
_diffrn_reflns_number             4849
_diffrn_reflns_av_unetI/netI      0.0237
_diffrn_reflns_av_R_equivalents   ?
_diffrn_reflns_limit_h_min        -10
_diffrn_reflns_limit_h_max        10
_diffrn_reflns_limit_k_min        -13
_diffrn_reflns_limit_k_max        13
_diffrn_reflns_limit_l_min        -15
_diffrn_reflns_limit_l_max        15
_diffrn_reflns_theta_min          2.837
_diffrn_reflns_theta_max          24.984
_diffrn_reflns_theta_full         24.984
_diffrn_measured_fraction_theta_max   0.999
_diffrn_measured_fraction_theta_full  0.999
_diffrn_reflns_Laue_measured_fraction_max    0.999
_diffrn_reflns_Laue_measured_fraction_full   0.999
_diffrn_reflns_point_group_measured_fraction_max   0.999
_diffrn_reflns_point_group_measured_fraction_full  0.999
_reflns_number_total              4849
_reflns_number_gt                 4066
_reflns_threshold_expression      'I > 2\s(I)'
_reflns_Friedel_coverage          0.000
_reflns_Friedel_fraction_max      .
_reflns_Friedel_fraction_full     .
 
_reflns_special_details
;
 _reflns_Friedel_fraction is defined as the number of unique
 Friedel pairs measured divided by the number that would be
 possible theoretically, ignoring centric projections and
 systematic absences. Completness statistics refer to single and
 composite reflections containing twin component 1 only.
;
 
_computing_data_collection        'CrysAlisPro 1.171.41.92a (Rigaku OD, 2020)'
_computing_cell_refinement        'CrysAlisPro 1.171.41.92a (Rigaku OD, 2020)'
_computing_data_reduction         'CrysAlisPro 1.171.41.92a (Rigaku OD, 2020)'
_computing_structure_solution     'SHELXT (Sheldrick, 2015)'
_computing_structure_refinement 'SHELXL-2018/3 (Sheldrick, 2018)'
_computing_molecular_graphics     'MERCURY, Version 2020.2.0 (Macrae et al., 2020)'
_computing_publication_material   'SHELXL-2018/3 (Sheldrick, 2018)'
_refine_special_details
;
 Refined as a 2-component twin.
;
_refine_ls_structure_factor_coef  Fsqd
_refine_ls_matrix_type            full
_refine_ls_weighting_scheme       calc
_refine_ls_weighting_details
'w=1/[\s^2^(Fo^2^)+(0.1279P)^2^+6.6407P] where P=(Fo^2^+2Fc^2^)/3'
_atom_sites_solution_primary      ?
_atom_sites_solution_secondary    ?
_atom_sites_solution_hydrogens    geom
_refine_ls_hydrogen_treatment     constr
_refine_ls_extinction_method      none
_refine_ls_extinction_coef        .
_refine_ls_number_reflns          4849
_refine_ls_number_parameters      182
_refine_ls_number_restraints      0
_refine_ls_R_factor_all           0.0674
_refine_ls_R_factor_gt            0.0575
_refine_ls_wR_factor_ref          0.1896
_refine_ls_wR_factor_gt           0.1792
_refine_ls_goodness_of_fit_ref    1.105
_refine_ls_restrained_S_all       1.105
_refine_ls_shift/su_max           0.000
_refine_ls_shift/su_mean          0.000
 
loop_
 _atom_site_label
 _atom_site_type_symbol
 _atom_site_fract_x
 _atom_site_fract_y
 _atom_site_fract_z
 _atom_site_U_iso_or_equiv
 _atom_site_adp_type
 _atom_site_occupancy
 _atom_site_site_symmetry_order  
 _atom_site_calc_flag
 _atom_site_refinement_flags_posn
 _atom_site_refinement_flags_adp
 _atom_site_refinement_flags_occupancy
 _atom_site_disorder_assembly
 _atom_site_disorder_group
Hg1 Hg 0.26046(5) 0.27489(5) 0.46050(4) 0.0282(3) Uani 1 1 d . . . . .
Br1 Br 0.24816(18) 0.23231(12) 0.27772(12) 0.0374(4) Uani 1 1 d . . . . .
N1 N 0.3097(11) 0.4251(10) 0.5605(8) 0.024(2) Uani 1 1 d . . . . .
N2 N 0.1997(13) 0.1082(10) 0.5473(9) 0.030(3) Uani 1 1 d . . . . .
O1 O 0.5127(11) 0.2539(9) 0.5326(9) 0.029(2) Uani 1 1 d . . . . .
O2 O 0.6786(10) 0.3536(8) 0.6284(8) 0.034(2) Uani 1 1 d . . . . .
O3 O 0.0059(11) 0.2876(8) 0.5278(9) 0.029(2) Uani 1 1 d . . . . .
O4 O -0.1477(11) 0.1956(9) 0.6275(9) 0.035(2) Uani 1 1 d . . . . .
H41 H -0.198945 0.254785 0.617866 0.052 Uiso 1 1 calc R U . . .
C1 C 0.4427(13) 0.4317(11) 0.6060(10) 0.020(3) Uani 1 1 d . . . . .
C2 C 0.4758(14) 0.5227(12) 0.6723(11) 0.027(3) Uani 1 1 d . . . . .
H2 H 0.571170 0.528351 0.703269 0.032 Uiso 1 1 calc R U . . .
C3 C 0.3714(16) 0.6040(13) 0.6931(12) 0.035(3) Uani 1 1 d . . . . .
H3 H 0.392854 0.664905 0.739122 0.042 Uiso 1 1 calc R U . . .
C4 C 0.2349(16) 0.5946(14) 0.6453(12) 0.037(4) Uani 1 1 d . . . . .
H4 H 0.160351 0.649135 0.658274 0.045 Uiso 1 1 calc R U . . .
C5 C 0.2078(15) 0.5058(11) 0.5789(12) 0.030(3) Uani 1 1 d . . . . .
H5 H 0.114495 0.500953 0.544867 0.035 Uiso 1 1 calc R U . . .
C6 C 0.5539(15) 0.3381(11) 0.5858(11) 0.026(3) Uani 1 1 d . . . . .
C7 C 0.0722(13) 0.1018(11) 0.5924(10) 0.021(3) Uani 1 1 d . . . . .
C8 C 0.0300(14) 0.0058(11) 0.6465(11) 0.027(3) Uani 1 1 d . . . . .
H8 H -0.063831 0.002131 0.675278 0.033 Uiso 1 1 calc R U . . .
C9 C 0.1282(17) -0.0847(12) 0.6573(12) 0.037(4) Uani 1 1 d . . . . .
H9 H 0.105009 -0.150043 0.696819 0.044 Uiso 1 1 calc R U . . .
C10 C 0.2602(16) -0.0781(14) 0.6096(13) 0.041(4) Uani 1 1 d . . . . .
H10 H 0.327201 -0.140563 0.613198 0.049 Uiso 1 1 calc R U . . .
C11 C 0.2938(18) 0.0196(13) 0.5569(12) 0.039(4) Uani 1 1 d . . . . .
H11 H 0.386329 0.024732 0.526431 0.047 Uiso 1 1 calc R U . . .
C12 C -0.0290(14) 0.2051(12) 0.5800(11) 0.023(3) Uani 1 1 d . . . . .
 
loop_
 _atom_site_aniso_label
 _atom_site_aniso_U_11
 _atom_site_aniso_U_22
 _atom_site_aniso_U_33
 _atom_site_aniso_U_23
 _atom_site_aniso_U_13
 _atom_site_aniso_U_12
Hg1 0.0260(4) 0.0330(4) 0.0255(4) -0.0042(2) 0.0010(2) 0.0029(2)
Br1 0.0489(11) 0.0383(8) 0.0251(9) -0.0040(6) 0.0025(7) -0.0052(7)
N1 0.017(6) 0.030(6) 0.025(6) 0.001(5) 0.002(4) 0.004(4)
N2 0.030(6) 0.023(6) 0.036(7) -0.004(5) -0.005(5) 0.007(5)
O1 0.026(6) 0.033(5) 0.029(6) -0.005(5) 0.002(4) 0.002(4)
O2 0.024(5) 0.033(5) 0.045(7) -0.004(5) -0.006(4) 0.005(4)
O3 0.027(5) 0.023(5) 0.038(7) 0.004(4) -0.003(4) 0.003(4)
O4 0.028(6) 0.029(5) 0.047(7) 0.009(5) 0.007(5) 0.007(4)
C1 0.020(7) 0.021(7) 0.018(7) 0.007(5) 0.004(5) -0.002(5)
C2 0.017(7) 0.026(7) 0.038(8) 0.004(6) 0.007(5) -0.009(5)
C3 0.041(9) 0.026(7) 0.039(9) -0.010(7) -0.001(6) -0.001(6)
C4 0.035(9) 0.033(8) 0.044(9) 0.000(7) 0.007(7) 0.008(6)
C5 0.024(7) 0.021(7) 0.044(9) -0.003(6) 0.001(6) 0.011(5)
C6 0.031(8) 0.018(7) 0.028(8) 0.007(6) 0.004(6) 0.006(5)
C7 0.021(7) 0.021(6) 0.020(7) 0.001(5) -0.004(5) -0.002(5)
C8 0.023(7) 0.025(7) 0.035(8) -0.004(6) 0.001(6) -0.004(5)
C9 0.051(10) 0.022(7) 0.038(10) 0.003(7) -0.006(7) 0.003(6)
C10 0.033(9) 0.025(8) 0.065(12) 0.003(7) 0.000(8) 0.010(6)
C11 0.033(8) 0.037(9) 0.047(10) 0.002(7) 0.000(7) 0.014(7)
C12 0.012(7) 0.029(7) 0.029(8) -0.004(6) -0.002(5) -0.001(5)
 
_geom_special_details
;
 All esds (except the esd in the dihedral angle between two l.s. planes)
 are estimated using the full covariance matrix.  The cell esds are taken
 into account individually in the estimation of esds in distances, angles
 and torsion angles; correlations between esds in cell parameters are only
 used when they are defined by crystal symmetry.  An approximate (isotropic)
 treatment of cell esds is used for estimating esds involving l.s. planes.
;
 
loop_
 _geom_bond_atom_site_label_1
 _geom_bond_atom_site_label_2
 _geom_bond_distance
 _geom_bond_site_symmetry_2
 _geom_bond_publ_flag
Hg1 N1 2.228(11) . ?
Hg1 N2 2.331(12) . ?
Hg1 Br1 2.4612(17) . ?
Hg1 O1 2.470(10) . ?
Hg1 O3 2.521(10) . ?
N1 C1 1.336(16) . ?
N1 C5 1.350(17) . ?
N2 C7 1.328(18) . ?
N2 C11 1.346(19) . ?
O1 C6 1.256(17) . ?
O2 C6 1.263(17) . ?
O3 C12 1.232(17) . ?
O4 C12 1.274(17) . ?
O4 H41 0.8400 . ?
C1 C2 1.400(19) . ?
C1 C6 1.519(17) . ?
C2 C3 1.38(2) . ?
C2 H2 0.9500 . ?
C3 C4 1.38(2) . ?
C3 H3 0.9500 . ?
C4 C5 1.37(2) . ?
C4 H4 0.9500 . ?
C5 H5 0.9500 . ?
C7 C8 1.389(19) . ?
C7 C12 1.521(18) . ?
C8 C9 1.39(2) . ?
C8 H8 0.9500 . ?
C9 C10 1.38(2) . ?
C9 H9 0.9500 . ?
C10 C11 1.37(2) . ?
C10 H10 0.9500 . ?
C11 H11 0.9500 . ?
 
loop_
 _geom_angle_atom_site_label_1
 _geom_angle_atom_site_label_2
 _geom_angle_atom_site_label_3
 _geom_angle
 _geom_angle_site_symmetry_1
 _geom_angle_site_symmetry_3
 _geom_angle_publ_flag
N1 Hg1 N2 114.2(4) . . ?
N1 Hg1 Br1 137.7(3) . . ?
N2 Hg1 Br1 108.1(3) . . ?
N1 Hg1 O1 71.6(4) . . ?
N2 Hg1 O1 87.9(4) . . ?
Br1 Hg1 O1 111.5(3) . . ?
N1 Hg1 O3 85.1(3) . . ?
N2 Hg1 O3 68.7(4) . . ?
Br1 Hg1 O3 110.3(3) . . ?
O1 Hg1 O3 136.7(3) . . ?
C1 N1 C5 119.9(12) . . ?
C1 N1 Hg1 118.1(8) . . ?
C5 N1 Hg1 121.9(9) . . ?
C7 N2 C11 118.7(13) . . ?
C7 N2 Hg1 119.6(9) . . ?
C11 N2 Hg1 121.5(11) . . ?
C6 O1 Hg1 113.2(8) . . ?
C12 O3 Hg1 114.3(8) . . ?
C12 O4 H41 109.5 . . ?
N1 C1 C2 119.7(12) . . ?
N1 C1 C6 118.7(11) . . ?
C2 C1 C6 121.5(11) . . ?
C3 C2 C1 120.6(12) . . ?
C3 C2 H2 119.7 . . ?
C1 C2 H2 119.7 . . ?
C2 C3 C4 118.3(14) . . ?
C2 C3 H3 120.9 . . ?
C4 C3 H3 120.9 . . ?
C5 C4 C3 119.3(14) . . ?
C5 C4 H4 120.3 . . ?
C3 C4 H4 120.3 . . ?
N1 C5 C4 122.0(13) . . ?
N1 C5 H5 119.0 . . ?
C4 C5 H5 119.0 . . ?
O1 C6 O2 127.3(12) . . ?
O1 C6 C1 118.1(12) . . ?
O2 C6 C1 114.6(12) . . ?
N2 C7 C8 122.6(12) . . ?
N2 C7 C12 116.5(11) . . ?
C8 C7 C12 120.9(12) . . ?
C9 C8 C7 118.4(13) . . ?
C9 C8 H8 120.8 . . ?
C7 C8 H8 120.8 . . ?
C10 C9 C8 118.7(14) . . ?
C10 C9 H9 120.6 . . ?
C8 C9 H9 120.6 . . ?
C11 C10 C9 119.4(14) . . ?
C11 C10 H10 120.3 . . ?
C9 C10 H10 120.3 . . ?
N2 C11 C10 122.0(15) . . ?
N2 C11 H11 119.0 . . ?
C10 C11 H11 119.0 . . ?
O3 C12 O4 125.7(12) . . ?
O3 C12 C7 120.6(12) . . ?
O4 C12 C7 113.7(12) . . ?
 
loop_
 _geom_torsion_atom_site_label_1
 _geom_torsion_atom_site_label_2
 _geom_torsion_atom_site_label_3
 _geom_torsion_atom_site_label_4
 _geom_torsion
 _geom_torsion_site_symmetry_1
 _geom_torsion_site_symmetry_2
 _geom_torsion_site_symmetry_3
 _geom_torsion_site_symmetry_4
 _geom_torsion_publ_flag
C5 N1 C1 C2 -0.2(19) . . . . ?
Hg1 N1 C1 C2 -177.6(9) . . . . ?
C5 N1 C1 C6 178.5(12) . . . . ?
Hg1 N1 C1 C6 1.1(15) . . . . ?
N1 C1 C2 C3 2(2) . . . . ?
C6 C1 C2 C3 -177.1(13) . . . . ?
C1 C2 C3 C4 -1(2) . . . . ?
C2 C3 C4 C5 0(2) . . . . ?
C1 N1 C5 C4 -1(2) . . . . ?
Hg1 N1 C5 C4 175.9(11) . . . . ?
C3 C4 C5 N1 2(2) . . . . ?
Hg1 O1 C6 O2 -176.7(12) . . . . ?
Hg1 O1 C6 C1 5.6(15) . . . . ?
N1 C1 C6 O1 -4.9(18) . . . . ?
C2 C1 C6 O1 173.8(13) . . . . ?
N1 C1 C6 O2 177.1(12) . . . . ?
C2 C1 C6 O2 -4.2(18) . . . . ?
C11 N2 C7 C8 -2(2) . . . . ?
Hg1 N2 C7 C8 -179.1(10) . . . . ?
C11 N2 C7 C12 179.2(13) . . . . ?
Hg1 N2 C7 C12 2.3(15) . . . . ?
N2 C7 C8 C9 3(2) . . . . ?
C12 C7 C8 C9 -178.5(12) . . . . ?
C7 C8 C9 C10 -3(2) . . . . ?
C8 C9 C10 C11 3(2) . . . . ?
C7 N2 C11 C10 2(2) . . . . ?
Hg1 N2 C11 C10 178.7(12) . . . . ?
C9 C10 C11 N2 -2(3) . . . . ?
Hg1 O3 C12 O4 175.2(11) . . . . ?
Hg1 O3 C12 C7 -5.1(16) . . . . ?
N2 C7 C12 O3 2.3(19) . . . . ?
C8 C7 C12 O3 -176.3(13) . . . . ?
N2 C7 C12 O4 -178.0(12) . . . . ?
C8 C7 C12 O4 3.4(19) . . . . ?
 
loop_
 _geom_hbond_atom_site_label_D 
 _geom_hbond_atom_site_label_H 
 _geom_hbond_atom_site_label_A 
 _geom_hbond_distance_DH 
 _geom_hbond_distance_HA 
 _geom_hbond_distance_DA 
 _geom_hbond_angle_DHA 
 _geom_hbond_site_symmetry_A 
 _geom_hbond_publ_flag
O4 H41 O2  0.84 1.61 2.429(13) 162.9 1_455 yes
 
_refine_diff_density_max    1.856
_refine_diff_density_min   -1.574
_refine_diff_density_rms    0.285

_shelx_res_file
;
TITL shelxt_a.res in P2(1)/c
    shelx.res
    created by SHELXL-2018/3 at 22:46:55 on 24-Jun-2021
CELL  0.71073   9.1223  11.6466  13.1976   90.000   92.073   90.000
ZERR     4.00   0.0004   0.0006   0.0006    0.000    0.004    0.000
LATT   1
SYMM  - X, 1/2 + Y, 1/2 - Z
SFAC  C    H    BR   HG   N    O
UNIT  48 36 4 4 8 16
MERG   0
OMIT    -1.00  50.00
MPLA  4 N1 N2 O1 O3 HG1
FMAP   2
PLAN   20
ACTA
BOND   $H
HTAB
EQIV $1 x-1, y, z
HTAB O4 O2_$1
CONF
LIST   4
L.S.  10
TEMP  -103.00
WGHT    0.127900    6.640700
BASF   0.20218
FVAR       0.31644
HG1   4    0.260462    0.274888    0.460496    11.00000    0.02599    0.03298 =
         0.02549   -0.00423    0.00098    0.00288
BR1   3    0.248164    0.232311    0.277719    11.00000    0.04895    0.03834 =
         0.02513   -0.00399    0.00253   -0.00523
N1    5    0.309748    0.425146    0.560522    11.00000    0.01673    0.03040 =
         0.02550    0.00125    0.00192    0.00399
N2    5    0.199684    0.108202    0.547264    11.00000    0.02989    0.02282 =
         0.03642   -0.00398   -0.00468    0.00710
O1    6    0.512678    0.253871    0.532604    11.00000    0.02643    0.03322 =
         0.02868   -0.00466    0.00232    0.00175
O2    6    0.678579    0.353584    0.628363    11.00000    0.02360    0.03255 =
         0.04457   -0.00364   -0.00595    0.00470
O3    6    0.005859    0.287629    0.527750    11.00000    0.02710    0.02266 =
         0.03800    0.00363   -0.00264    0.00346
O4    6   -0.147661    0.195608    0.627455    11.00000    0.02826    0.02903 =
         0.04662    0.00863    0.00698    0.00692
AFIX  83
H41   2   -0.198945    0.254785    0.617866    11.00000   -1.50000
AFIX   0
C1    1    0.442730    0.431735    0.605991    11.00000    0.02018    0.02139 =
         0.01828    0.00680    0.00411   -0.00234
C2    1    0.475808    0.522654    0.672298    11.00000    0.01697    0.02573 =
         0.03761    0.00446    0.00745   -0.00939
AFIX  43
H2    2    0.571170    0.528351    0.703269    11.00000   -1.20000
AFIX   0
C3    1    0.371389    0.603973    0.693085    11.00000    0.04064    0.02615 =
         0.03880   -0.00972   -0.00108   -0.00140
AFIX  43
H3    2    0.392854    0.664905    0.739122    11.00000   -1.20000
AFIX   0
C4    1    0.234868    0.594640    0.645329    11.00000    0.03517    0.03306 =
         0.04372   -0.00041    0.00662    0.00761
AFIX  43
H4    2    0.160351    0.649135    0.658274    11.00000   -1.20000
AFIX   0
C5    1    0.207825    0.505822    0.578932    11.00000    0.02436    0.02059 =
         0.04361   -0.00340    0.00079    0.01052
AFIX  43
H5    2    0.114495    0.500953    0.544867    11.00000   -1.20000
AFIX   0
C6    1    0.553852    0.338094    0.585826    11.00000    0.03114    0.01808 =
         0.02787    0.00660    0.00433    0.00571
C7    1    0.072219    0.101848    0.592392    11.00000    0.02145    0.02106 =
         0.01980    0.00077   -0.00422   -0.00223
C8    1    0.029985    0.005768    0.646453    11.00000    0.02281    0.02453 =
         0.03485   -0.00357    0.00132   -0.00405
AFIX  43
H8    2   -0.063831    0.002131    0.675278    11.00000   -1.20000
AFIX   0
C9    1    0.128153   -0.084749    0.657325    11.00000    0.05076    0.02160 =
         0.03829    0.00296   -0.00624    0.00291
AFIX  43
H9    2    0.105009   -0.150043    0.696819    11.00000   -1.20000
AFIX   0
C10   1    0.260219   -0.078115    0.609614    11.00000    0.03329    0.02490 =
         0.06499    0.00269    0.00030    0.01018
AFIX  43
H10   2    0.327201   -0.140563    0.613198    11.00000   -1.20000
AFIX   0
C11   1    0.293824    0.019575    0.556947    11.00000    0.03343    0.03688 =
         0.04689    0.00217   -0.00049    0.01416
AFIX  43
H11   2    0.386329    0.024732    0.526431    11.00000   -1.20000
AFIX   0
C12   1   -0.029040    0.205064    0.580038    11.00000    0.01237    0.02893 =
         0.02859   -0.00442   -0.00219   -0.00080
HKLF    5


REM  shelxt_a.res in P2(1)/c
REM wR2 = 0.1896, GooF = S = 1.105, Restrained GooF = 1.105 for all data
REM R1 = 0.0575 for 4066 Fo > 4sig(Fo) and 0.0674 for all 4849 data
REM 182 parameters refined using 0 restraints

END

WGHT      0.1278      6.6871

REM Instructions for potential hydrogen bonds
HTAB O4 O2_$1

REM Highest difference peak  1.856,  deepest hole -1.574,  1-sigma level  0.285
Q1    1   0.2086  0.2753  0.5329  11.00000  0.05    1.72
Q2    1   0.1604  0.2867  0.4662  11.00000  0.05    1.61
Q3    1   0.3381  0.2799  0.4023  11.00000  0.05    1.51
Q4    1   0.3652  0.2822  0.4836  11.00000  0.05    1.33
Q5    1   0.4417  0.3382  0.5211  11.00000  0.05    1.27
Q6    1   0.0826  0.2001  0.4144  11.00000  0.05    1.20
Q7    1   0.4251  0.2203  0.5165  11.00000  0.05    1.11
Q8    1   0.0769  0.1531  0.2253  11.00000  0.05    1.10
Q9    1   0.0882  0.3392  0.4098  11.00000  0.05    1.06
Q10   1   0.1824  0.1975  0.4733  11.00000  0.05    1.06
Q11   1   0.3380  0.2569  0.2395  11.00000  0.05    1.01
Q12   1   0.5245  0.1976  0.6181  11.00000  0.05    0.98
Q13   1   0.3410  0.2298  0.3284  11.00000  0.05    0.96
Q14   1   0.5571  0.2703  0.5168  11.00000  0.05    0.95
Q15   1  -0.2499  0.2995  0.6201  11.00000  0.05    0.93
Q16   1   0.1063  0.2688  0.2367  11.00000  0.05    0.89
Q17   1   0.2351  0.1280  0.5236  11.00000  0.05    0.89
Q18   1   0.4080  0.3789  0.4186  11.00000  0.05    0.89
Q19   1  -0.0320 -0.2101  0.6960  11.00000  0.05    0.88
Q20   1   0.4010  0.3149  0.3240  11.00000  0.05    0.86
;
_shelx_res_checksum   79156

_shelx_hkl_file
;
   0   0  -2 5855.56 30.7740  -2
   0   0  -2 5855.56 30.7740   1
   0   0  -4 1606.29 19.8977  -2
   0   0  -4 1606.29 19.8977   1
   0   0  -6 195.961 7.17584  -2
   0   0  -6 195.961 7.17584   1
   0   0   8 617.600 9.87200  -2
   0   0   8 617.600 9.87200   1
   0   0  10 805.225 21.7671  -2
   0   0  10 805.225 21.7671   1
   0   0  12 1603.26 29.3930  -2
   0   0  12 1603.26 29.3930   1
   0   0 -14 542.278 24.8339  -2
   0   0 -14 542.278 24.8339   1
   0   0  16 971.786 34.4869  -2
   0   0  16 971.786 34.4869   1
   0   0  18-2.93637 16.8839  -2
   0   0  18-2.93637 16.8839   1
   0  -1  -2 802.242 6.96098  -2
   0   1  -2 802.242 6.96098   1
   0   1  -3 48.0117 2.26164  -2
   0  -1  -3 48.0117 2.26164   1
   0  -1   4 167.436 4.33714  -2
   0   1   4 167.436 4.33714   1
   0   1  -5 11.1076 2.21694  -2
   0  -1  -5 11.1076 2.21694   1
   0   1  -6 8392.26 32.6605  -2
   0  -1  -6 8392.26 32.6605   1
   0  -1  -7 7.17056 2.07154  -2
   0   1  -7 7.17056 2.07154   1
   0   1   8 790.813 9.11460  -2
   0  -1   8 790.813 9.11460   1
   0   1  -9 51.5537 2.72396  -2
   0  -1  -9 51.5537 2.72396   1
   0   1 -10 776.751 22.1350  -2
   0  -1 -10 776.751 22.1350   1
   0  -1  11 2.92475 2.72382  -2
   0   1  11 2.92475 2.72382   1
   0  -1  12 71.0351 4.61997  -2
   0   1  12 71.0351 4.61997   1
   0   1  13 53.9626 6.75045  -2
   0  -1  13 53.9626 6.75045   1
   0  -1  14 10.6378 9.52845  -2
   0   1  14 10.6378 9.52845   1
   0  -1  15 7.66848 9.36144  -2
   0   1  15 7.66848 9.36144   1
   0  -1  16 573.685 25.7578  -2
   0   1  16 573.685 25.7578   1
   0   1 -17 8.29368 11.6173  -2
   0  -1 -17 8.29368 11.6173   1
   0  -1  18 393.607 24.1489  -2
   0   1  18 393.607 24.1489   1
   0  -1  19-10.6177 22.1570  -2
   0   1  19-10.6177 22.1570   1
   0   1  20 149.354 36.2133  -2
   0  -1  20 149.354 36.2133   1
   0  -2   0 13984.8 30.1703  -2
   0   2   0 13984.8 30.1703   1
   0  -2   1 0.73755 0.75714  -2
   0   2   1 0.73755 0.75714   1
   0   2   2 2707.51 8.99969  -2
   0  -2   2 2707.51 8.99969   1
   0  -2  -3 278.879 3.40179  -2
   0   2  -3 278.879 3.40179   1
   0   2   4 6714.87 16.8919  -2
   0  -2   4 6714.87 16.8919   1
   0  -2  -5 366.262 4.75345  -2
   0   2  -5 366.262 4.75345   1
   0   2  -6 47.4979 2.28976  -2
   0  -2  -6 47.4979 2.28976   1
   0  -2  -7 684.408 9.54208  -2
   0   2  -7 684.408 9.54208   1
   0  -2   8 126.291 4.47830  -2
   0   2   8 126.291 4.47830   1
   0  -2   9 120.031 5.12993  -2
   0   2   9 120.031 5.12993   1
   0  -2 -10 1058.66 13.1296  -2
   0   2 -10 1058.66 13.1296   1
   0  -2  11 2.60590 2.49731  -2
   0   2  11 2.60590 2.49731   1
   0   2  12 2669.71 22.2245  -2
   0  -2  12 2669.71 22.2245   1
   0   2 -13 7.24570 6.10189  -2
   0  -2 -13 7.24570 6.10189   1
   0   2  14 433.716 13.8177  -2
   0  -2  14 433.716 13.8177   1
   0  -2  15 70.5096 11.1917  -2
   0   2  15 70.5096 11.1917   1
   0  -2  16 866.714 26.4482  -2
   0   2  16 866.714 26.4482   1
   0  -2 -17 16.8431 11.1599  -2
   0   2 -17 16.8431 11.1599   1
   0   2  18-1.92042 14.3279  -2
   0  -2  18-1.92042 14.3279   1
   0   2  19 82.2161 31.6840  -2
   0  -2  19 82.2161 31.6840   1
   0   2  20 6.04130 21.7084  -2
   0  -2  20 6.04130 21.7084   1
   0   3  -1 1563.23 6.19052  -2
   0  -3  -1 1563.23 6.19052   1
   0   3  -2 1360.65 7.25245  -2
   0  -3  -2 1360.65 7.25245   1
   0  -3  -3 1124.11 6.70355  -2
   0   3  -3 1124.11 6.70355   1
   0   3  -4 2941.59 11.8220  -2
   0  -3  -4 2941.59 11.8220   1
   0  -3   5 43.9928 1.89431  -2
   0   3   5 43.9928 1.89431   1
   0  -3  -6 6782.92 19.1706  -2
   0   3  -6 6782.92 19.1706   1
   0   3   7 75.1401 2.87201  -2
   0  -3   7 75.1401 2.87201   1
   0   3  -8 257.458 6.22333  -2
   0  -3  -8 257.458 6.22333   1
   0   3   9 499.062 9.12805  -2
   0  -3   9 499.062 9.12805   1
   0  -3 -10 1774.62 16.9707  -2
   0   3 -10 1774.62 16.9707   1
   0  -3  11 272.655 6.94368  -2
   0   3  11 272.655 6.94368   1
   0  -3 -12 46.9864 3.85678  -2
   0   3 -12 46.9864 3.85678   1
   0   3  13 379.535 12.8608  -2
   0  -3  13 379.535 12.8608   1
   0  -3 -14 17.8375 6.54412  -2
   0   3 -14 17.8375 6.54412   1
   0  -3  15 74.2778 12.9953  -2
   0   3  15 74.2778 12.9953   1
   0  -3  16 563.564 21.6570  -2
   0   3  16 563.564 21.6570   1
   0  -3  17 35.9073 16.4646  -2
   0   3  17 35.9073 16.4646   1
   0  -3 -18 322.409 23.2396  -2
   0   3 -18 322.409 23.2396   1
   0   3  19 3.81664 27.2497  -2
   0  -3  19 3.81664 27.2497   1
   0  -4   0 8125.12 30.4441  -2
   0   4   0 8125.12 30.4441   1
   0  -4   1 1.13950 0.82075  -2
   0   4   1 1.13950 0.82075   1
   0   4   2 1567.85 7.36850  -2
   0  -4   2 1567.85 7.36850   1
   0   4  -3 2284.36 10.4482  -2
   0  -4  -3 2284.36 10.4482   1
   0   4  -4 4289.12 15.5283  -2
   0  -4  -4 4289.12 15.5283   1
   0   4  -5 675.650 6.70325  -2
   0  -4  -5 675.650 6.70325   1
   0   4   6 4.45042 1.48576  -2
   0  -4   6 4.45042 1.48576   1
   0   4  -7 727.452 7.15959  -2
   0  -4  -7 727.452 7.15959   1
   0  -4   8 238.811 4.98040  -2
   0   4   8 238.811 4.98040   1
   0  -4   9 452.690 9.11492  -2
   0   4   9 452.690 9.11492   1
   0  -4  10 880.347 12.2957  -2
   0   4  10 880.347 12.2957   1
   0   4 -11 15.1709 3.56805  -2
   0  -4 -11 15.1709 3.56805   1
   0  -4  12 860.378 13.1281  -2
   0   4  12 860.378 13.1281   1
   0  -4  13 8.00819 6.83425  -2
   0   4  13 8.00819 6.83425   1
   0  -4 -14 254.685 10.5530  -2
   0   4 -14 254.685 10.5530   1
   0  -4  15 246.854 12.8322  -2
   0   4  15 246.854 12.8322   1
   0   4 -16 561.935 30.2091  -2
   0  -4 -16 561.935 30.2091   1
   0   4 -17 73.5144 15.4444  -2
   0  -4 -17 73.5144 15.4444   1
   0   4  18 4.90860 16.5699  -2
   0  -4  18 4.90860 16.5699   1
   0   4  19 119.510 35.5388  -2
   0  -4  19 119.510 35.5388   1
   0  -5   1 2760.71 12.7588  -2
   0   5   1 2760.71 12.7588   1
   0   5  -2 1454.26 7.16541  -2
   0  -5  -2 1454.26 7.16541   1
   0  -5  -3 2989.55 12.8773  -2
   0   5  -3 2989.55 12.8773   1
   0   5   4 242.017 4.44398  -2
   0  -5   4 242.017 4.44398   1
   0   5  -5 37.2340 2.20272  -2
   0  -5  -5 37.2340 2.20272   1
   0   5  -6 2221.95 13.3436  -2
   0  -5  -6 2221.95 13.3436   1
   0  -5   7 1.75588 2.11203  -2
   0   5   7 1.75588 2.11203   1
   0  -5  -8 173.915 4.09132  -2
   0   5  -8 173.915 4.09132   1
   0   5  -9 985.140 11.9607  -2
   0  -5  -9 985.140 11.9607   1
   0  -5  10 984.707 13.0546  -2
   0   5  10 984.707 13.0546   1
   0   5 -11 220.498 6.92654  -2
   0  -5 -11 220.498 6.92654   1
   0  -5 -12 23.8910 4.72627  -2
   0   5 -12 23.8910 4.72627   1
   0  -5  13 766.452 16.1521  -2
   0   5  13 766.452 16.1521   1
   0  -5  14-0.86964 6.97694  -2
   0   5  14-0.86964 6.97694   1
   0   5 -15 271.045 16.0124  -2
   0  -5 -15 271.045 16.0124   1
   0   5 -16 143.289 18.9837  -2
   0  -5 -16 143.289 18.9837   1
   0  -5 -17 54.6713 17.3866  -2
   0   5 -17 54.6713 17.3866   1
   0  -5 -18 142.593 20.5784  -2
   0   5 -18 142.593 20.5784   1
   0  -6   0 4795.26 29.9537  -2
   0   6   0 4795.26 29.9537   1
   0   6  -1 6.73604 1.90329  -2
   0  -6  -1 6.73604 1.90329   1
   0  -6  -2 519.465 4.72119  -2
   0   6  -2 519.465 4.72119   1
   0  -6  -3 2442.91 10.3538  -2
   0   6  -3 2442.91 10.3538   1
   0   6   4 1571.57 10.3610  -2
   0  -6   4 1571.57 10.3610   1
   0   6  -5 737.684 6.95196  -2
   0  -6  -5 737.684 6.95196   1
   0   6  -6 9.37700 2.27752  -2
   0  -6  -6 9.37700 2.27752   1
   0   6   7 1342.29 11.3178  -2
   0  -6   7 1342.29 11.3178   1
   0  -6  -8 44.2213 3.50490  -2
   0   6  -8 44.2213 3.50490   1
   0  -6  -9 675.772 9.71467  -2
   0   6  -9 675.772 9.71467   1
   0   6 -10 235.015 8.17207  -2
   0  -6 -10 235.015 8.17207   1
   0  -6  11 11.3621 4.89767  -2
   0   6  11 11.3621 4.89767   1
   0  -6  12 454.780 9.10737  -2
   0   6  12 454.780 9.10737   1
   0   6 -13 14.4452 8.95641  -2
   0  -6 -13 14.4452 8.95641   1
   0  -6  14 160.131 13.6299  -2
   0   6  14 160.131 13.6299   1
   0   6  15 258.122 17.6237  -2
   0  -6  15 258.122 17.6237   1
   0   6 -16 291.995 23.2646  -2
   0  -6 -16 291.995 23.2646   1
   0   6 -17 51.6486 17.1706  -2
   0  -6 -17 51.6486 17.1706   1
   0  -6 -18-4.81258 16.8906  -2
   0   6 -18-4.81258 16.8906   1
   0  -7  -1 2467.51 17.1193  -2
   0   7  -1 2467.51 17.1193   1
   0   7  -2 503.916 6.11690  -2
   0  -7  -2 503.916 6.11690   1
   0   7   3 2988.86 12.8644  -2
   0  -7   3 2988.86 12.8644   1
   0  -7  -4 31.7727 2.66758  -2
   0   7  -4 31.7727 2.66758   1
   0   7   5 126.057 4.40771  -2
   0  -7   5 126.057 4.40771   1
   0   7  -6 328.504 9.86563  -2
   0  -7  -6 328.504 9.86563   1
   0  -7  -7 14.0851 3.41819  -2
   0   7  -7 14.0851 3.41819   1
   0   7  -8 28.9190 4.61334  -2
   0  -7  -8 28.9190 4.61334   1
   0   7  -9 1159.92 15.4899  -2
   0  -7  -9 1159.92 15.4899   1
   0  -7  10 466.181 9.46659  -2
   0   7  10 466.181 9.46659   1
   0  -7 -11 457.336 12.1663  -2
   0   7 -11 457.336 12.1663   1
   0  -7 -12 16.4558 6.42968  -2
   0   7 -12 16.4558 6.42968   1
   0  -7 -13 972.920 29.7777  -2
   0   7 -13 972.920 29.7777   1
   0  -7  14 13.3031 9.66594  -2
   0   7  14 13.3031 9.66594   1
   0  -7  15 203.984 16.9720  -2
   0   7  15 203.984 16.9720   1
   0   7 -16 33.0314 14.4693  -2
   0  -7 -16 33.0314 14.4693   1
   0  -7 -17 53.2136 15.6340  -2
   0   7 -17 53.2136 15.6340   1
   0  -8   0 1075.68 18.8308  -2
   0   8   0 1075.68 18.8308   1
   0  -8  -1 2.20722 2.75847  -2
   0   8  -1 2.20722 2.75847   1
   0   8  -2 18.7518 3.14939  -2
   0  -8  -2 18.7518 3.14939   1
   0  -8  -3 2248.30 8.91395  -2
   0   8  -3 2248.30 8.91395   1
   0  -8   4 549.726 7.01517  -2
   0   8   4 549.726 7.01517   1
   0   8   5 944.076 10.5692  -2
   0  -8   5 944.076 10.5692   1
   0  -8  -6 2.80219 2.86293  -2
   0   8  -6 2.80219 2.86293   1
   0  -8  -7 1221.32 15.7554  -2
   0   8  -7 1221.32 15.7554   1
   0   8  -8 4.03984 4.77763  -2
   0  -8  -8 4.03984 4.77763   1
   0   8  -9 526.402 14.9826  -2
   0  -8  -9 526.402 14.9826   1
   0   8  10 72.8801 6.51659  -2
   0  -8  10 72.8801 6.51659   1
   0   8 -11 50.1496 8.55529  -2
   0  -8 -11 50.1496 8.55529   1
   0  -8 -12 103.481 10.2273  -2
   0   8 -12 103.481 10.2273   1
   0   8 -13-0.30372 10.3732  -2
   0  -8 -13-0.30372 10.3732   1
   0  -8 -14 29.3165 12.1810  -2
   0   8 -14 29.3165 12.1810   1
   0  -8  15 215.933 16.7752  -2
   0   8  15 215.933 16.7752   1
   0  -8  16 106.868 18.6954  -2
   0   8  16 106.868 18.6954   1
   0   8 -17 74.8432 24.0368  -2
   0  -8 -17 74.8432 24.0368   1
   0  -9   1 1498.88 17.3269  -2
   0   9   1 1498.88 17.3269   1
   0   9   2 27.2205 3.57477  -2
   0  -9   2 27.2205 3.57477   1
   0  -9   3 1687.30 15.9097  -2
   0   9   3 1687.30 15.9097   1
   0  -9  -4 10.2956 2.25861  -2
   0   9  -4 10.2956 2.25861   1
   0  -9   5 111.797 4.42468  -2
   0   9   5 111.797 4.42468   1
   0  -9   6 192.439 5.65748  -2
   0   9   6 192.439 5.65748   1
   0   9   7 34.9860 5.28189  -2
   0  -9   7 34.9860 5.28189   1
   0   9  -8 9.28368 4.91847  -2
   0  -9  -8 9.28368 4.91847   1
   0  -9   9 808.259 16.3959  -2
   0   9   9 808.259 16.3959   1
   0  -9 -10 52.4131 8.28731  -2
   0   9 -10 52.4131 8.28731   1
   0  -9  11 255.354 12.3225  -2
   0   9  11 255.354 12.3225   1
   0   9 -12 7.05523 7.72266  -2
   0  -9 -12 7.05523 7.72266   1
   0   9 -13 859.743 26.0754  -2
   0  -9 -13 859.743 26.0754   1
   0  -9  14 25.2342 12.1956  -2
   0   9  14 25.2342 12.1956   1
   0   9 -15 141.871 16.7338  -2
   0  -9 -15 141.871 16.7338   1
   0   9  16-0.76240 12.6834  -2
   0  -9  16-0.76240 12.6834   1
   0   9 -17 18.9764 21.0474  -2
   0  -9 -17 18.9764 21.0474   1
   0  10   0 28.8002 6.64104  -2
   0 -10   0 28.8002 6.64104   1
   0 -10   1 20.3043 4.43590  -2
   0  10   1 20.3043 4.43590   1
   0 -10  -2 40.3605 4.16686  -2
   0  10  -2 40.3605 4.16686   1
   0  10   3 1739.71 18.3273  -2
   0 -10   3 1739.71 18.3273   1
   0  10   4 106.652 6.91824  -2
   0 -10   4 106.652 6.91824   1
   0  10   5 723.813 6.61114  -2
   0 -10   5 723.813 6.61114   1
   0 -10   6 3.61972 3.50261  -2
   0  10   6 3.61972 3.50261   1
   0 -10   7 1247.76 19.0832  -2
   0  10   7 1247.76 19.0832   1
   0 -10   8 45.7011 6.94683  -2
   0  10   8 45.7011 6.94683   1
   0  10  -9 333.601 12.8306  -2
   0 -10  -9 333.601 12.8306   1
   0 -10 -10 10.8089 7.09882  -2
   0  10 -10 10.8089 7.09882   1
   0 -10  11 19.2634 8.30866  -2
   0  10  11 19.2634 8.30866   1
   0  10  12 8.17389 8.86816  -2
   0 -10  12 8.17389 8.86816   1
   0  10  13 5.76975 9.75791  -2
   0 -10  13 5.76975 9.75791   1
   0  10  14-0.56093 10.2673  -2
   0 -10  14-0.56093 10.2673   1
   0 -10 -15 200.816 21.7294  -2
   0  10 -15 200.816 21.7294   1
   0 -10 -16 21.9880 22.6342  -2
   0  10 -16 21.9880 22.6342   1
   0 -10 -17 46.4839 33.9445  -2
   0  10 -17 46.4839 33.9445   1
   0  11   1 1254.04 18.0286  -2
   0 -11   1 1254.04 18.0286   1
   0  11  -2 14.1279 4.21045  -2
   0 -11  -2 14.1279 4.21045   1
   0  11   3 808.208 11.8825  -2
   0 -11   3 808.208 11.8825   1
   0 -11   4 23.4978 6.28935  -2
   0  11   4 23.4978 6.28935   1
   0 -11  -5 11.2141 5.79675  -2
   0  11  -5 11.2141 5.79675   1
   0 -11   6 4.99103 4.17609  -2
   0  11   6 4.99103 4.17609   1
   0 -11  -7 75.6317 7.15436  -2
   0  11  -7 75.6317 7.15436   1
   0 -11   8 27.7876 8.19847  -2
   0  11   8 27.7876 8.19847   1
   0 -11   9 448.240 17.8384  -2
   0  11   9 448.240 17.8384   1
   0  11 -10 9.62034 8.98972  -2
   0 -11 -10 9.62034 8.98972   1
   0 -11 -11 153.157 13.7507  -2
   0  11 -11 153.157 13.7507   1
   0 -11  12-5.75675 12.2425  -2
   0  11  12-5.75675 12.2425   1
   0 -11  13 538.942 25.5335  -2
   0  11  13 538.942 25.5335   1
   0 -11  14 33.5500 15.0541  -2
   0  11  14 33.5500 15.0541   1
   0  11 -15 209.108 51.0187  -2
   0 -11 -15 209.108 51.0187   1
   0  12   0 6.02179 7.48000  -2
   0 -12   0 6.02179 7.48000   1
   0  12  -1 161.474 7.88517  -2
   0 -12  -1 161.474 7.88517   1
   0  12   2 104.728 6.47013  -2
   0 -12   2 104.728 6.47013   1
   0 -12   3 326.964 11.0834  -2
   0  12   3 326.964 11.0834   1
   0  12   4 35.4125 6.62695  -2
   0 -12   4 35.4125 6.62695   1
   0 -12   5 262.614 12.4115  -2
   0  12   5 262.614 12.4115   1
   0  12  -6-1.08969 6.70599  -2
   0 -12  -6-1.08969 6.70599   1
   0  12  -7 636.301 21.3130  -2
   0 -12  -7 636.301 21.3130   1
   0 -12  -8 41.3627 10.7061  -2
   0  12  -8 41.3627 10.7061   1
   0 -12  -9 254.551 16.4770  -2
   0  12  -9 254.551 16.4770   1
   0  12 -10 19.6661 12.1430  -2
   0 -12 -10 19.6661 12.1430   1
   0  12 -11 14.0318 12.7602  -2
   0 -12 -11 14.0318 12.7602   1
   0  12 -12 47.8889 15.4425  -2
   0 -12 -12 47.8889 15.4425   1
   0 -12  13 16.5321 13.9656  -2
   0  12  13 16.5321 13.9656   1
   0 -12  14 38.0243 23.7057  -2
   0  12  14 38.0243 23.7057   1
   0 -13   1 607.193 13.7045  -2
   0  13   1 607.193 13.7045   1
   0  13  -2 13.0382 6.74963  -2
   0 -13  -2 13.0382 6.74963   1
   0  13   3 543.310 13.3821  -2
   0 -13   3 543.310 13.3821   1
   0 -13   4 163.445 9.12385  -2
   0  13   4 163.445 9.12385   1
   0  13  -5 2.62448 5.99379  -2
   0 -13  -5 2.62448 5.99379   1
   0  13  -6 116.545 13.2852  -2
   0 -13  -6 116.545 13.2852   1
   0 -13  -7-9.00677 9.45854  -2
   0  13  -7-9.00677 9.45854   1
   0 -13  -8 37.8683 11.8011  -2
   0  13  -8 37.8683 11.8011   1
   0 -13  -9 170.949 15.6027  -2
   0  13  -9 170.949 15.6027   1
   0 -13  10 14.8944 11.5240  -2
   0  13  10 14.8944 11.5240   1
   0  13  11 56.6245 15.4222  -2
   0 -13  11 56.6245 15.4222   1
   0  13  12 3.90660 15.5202  -2
   0 -13  12 3.90660 15.5202   1
   0  13 -13 331.012 57.5761  -2
   0 -13 -13 331.012 57.5761   1
   0  14   0 272.158 26.1563  -2
   0 -14   0 272.158 26.1563   1
   0  14   1 16.0038 6.73297  -2
   0 -14   1 16.0038 6.73297   1
   0 -14   2 130.405 9.98481  -2
   0  14   2 130.405 9.98481   1
   0  14   3 203.228 10.4985  -2
   0 -14   3 203.228 10.4985   1
   0  14   4 15.7369 7.38645  -2
   0 -14   4 15.7369 7.38645   1
   0 -14  -5 85.5147 11.3993  -2
   0  14  -5 85.5147 11.3993   1
   0 -14  -6 14.7327 10.1987  -2
   0  14  -6 14.7327 10.1987   1
   0 -14   7 280.552 14.7036  -2
   0  14   7 280.552 14.7036   1
   0 -14   8 24.8016 11.5348  -2
   0  14   8 24.8016 11.5348   1
   0 -14   9 93.0670 13.9107  -2
   0  14   9 93.0670 13.9107   1
   0 -14  10 48.1628 12.8468  -2
   0  14  10 48.1628 12.8468   1
   0  14  11 19.6643 22.2719  -2
   0 -14  11 19.6643 22.2719   1
   0  14 -12 3.81282 31.8028  -2
   0 -14 -12 3.81282 31.8028   1
   0 -15  -1 112.038 12.7363  -2
   0  15  -1 112.038 12.7363   1
   0  15   2 55.4050 11.5750  -2
   0 -15   2 55.4050 11.5750   1
   0 -15  -3 55.8699 11.1252  -2
   0  15  -3 55.8699 11.1252   1
   0 -15  -4 49.4821 11.1304  -2
   0  15  -4 49.4821 11.1304   1
   0 -15   5 10.4304 9.96776  -2
   0  15   5 10.4304 9.96776   1
   0  15   6 101.527 13.9114  -2
   0 -15   6 101.527 13.9114   1
   0  15   7 25.2125 11.6193  -2
   0 -15   7 25.2125 11.6193   1
   0  15   8 68.1769 12.9460  -2
   0 -15   8 68.1769 12.9460   1
   0 -15  -9 44.7795 16.8715  -2
   0  15  -9 44.7795 16.8715   1
   0  15 -10-1.03664 24.6789  -2
   0 -15 -10-1.03664 24.6789   1
   0 -16   0 180.736 18.6895  -2
   0  16   0 180.736 18.6895   1
   0 -16  -1 4.61892 10.5981  -2
   0  16  -1 4.61892 10.5981   1
   0  16  -2 90.6300 17.8531  -2
   0 -16  -2 90.6300 17.8531   1
   0  16  -3 80.8805 18.4195  -2
   0 -16  -3 80.8805 18.4195   1
   0  16   4 37.8231 13.1616  -2
   0 -16   4 37.8231 13.1616   1
   0 -16  -5 31.8498 13.5970  -2
   0  16  -5 31.8498 13.5970   1
   0 -16  -6 3.16214 12.6470  -2
   0  16  -6 3.16214 12.6470   1
   0  16  -7 42.6979 18.6829  -2
   0 -16  -7 42.6979 18.6829   1
   0 -16  -8 15.4125 16.1958  -2
   0  16  -8 15.4125 16.1958   1
   0  17  -1 23.6634 15.0887  -2
   0 -17  -1 23.6634 15.0887   1
   0  17  -2 43.1566 18.6922  -2
   0 -17  -2 43.1566 18.6922   1
   0  17   3 8.58596 18.7524  -2
   0 -17   3 8.58596 18.7524   1
   0  17  -4 18.3717 31.4820  -2
   0 -17  -4 18.3717 31.4820   1
   0  17  -5 12.1213 27.4306  -2
   0 -17  -5 12.1213 27.4306   1
   1   0  18 336.031 29.3251  -2
  -1   0  18 336.031 29.3251   1
   1   0  16 533.312 29.4825  -2
  -1   0  16 533.312 29.4825   1
   1   0  14 56.6209 18.2516  -2
  -1   0  14 56.6209 18.2516   1
   1   0  12 87.9370 19.4287  -2
  -1   0  12 87.9370 19.4287   1
  -1   0 -10 3601.01 51.7985  -2
   1   0 -10 3601.01 51.7985   1
  -1   0  -8 734.741 25.7424  -2
   1   0  -8 734.741 25.7424   1
  -1   0  -6 6845.47 51.6869  -2
   1   0  -6 6845.47 51.6869   1
   1   0   4 1481.94 11.7586  -2
  -1   0   4 1481.94 11.7586   1
   1   0  -2 867.202 14.3436   1
  -1   0  -2 785.282 16.4699   1
  -1   0   2 973.484 27.8805  -2
   1   0   2 973.484 27.8805   1
   1   0  -4 816.852 8.27500  -2
  -1   0  -4 816.852 8.27500   1
   1   0  -6 6364.08 47.9599  -2
  -1   0  -6 6364.08 47.9599   1
   1   0  -8 897.092 48.1358  -2
  -1   0  -8 897.092 48.1358   1
  -1   0  10 3187.03 40.0415  -2
   1   0  10 3187.03 40.0415   1
  -1   0  12 24.3728 7.37658  -2
   1   0  12 24.3728 7.37658   1
  -1   0  14 24.6423 6.79191  -2
   1   0  14 24.6423 6.79191   1
  -1   0  16 499.661 29.5645  -2
   1   0  16 499.661 29.5645   1
  -1   0  18 433.633 29.8475  -2
   1   0  18 433.633 29.8475   1
   1   1  19 15.5709 22.0671  -2
  -1  -1  19 15.5709 22.0671   1
   1   1  18 20.8459 13.9404  -2
  -1  -1  18 20.8459 13.9404   1
   1   1  17 14.1590 13.4486  -2
  -1  -1  17 14.1590 13.4486   1
   1  -1  16 806.601 27.1818  -2
  -1   1  16 806.601 27.1818   1
   1  -1  15 31.8944 13.8462  -2
  -1   1  15 31.8944 13.8462   1
   1   1  14 550.189 26.1849  -2
  -1  -1  14 550.189 26.1849   1
   1  -1  13-3.54647 6.31359  -2
  -1   1  13-3.54647 6.31359   1
   1  -1  12 1446.78 22.1919  -2
  -1   1  12 1446.78 22.1919   1
   1  -1  11 23.2706 6.16735  -2
  -1   1  11 23.2706 6.16735   1
   1  -1  10 1485.22 31.3707  -2
  -1   1  10 1485.22 31.3707   1
   1  -1   9 90.6654 4.69800  -2
  -1   1   9 90.6654 4.69800   1
  -1  -1  -8 920.217 10.5636  -2
   1   1  -8 920.217 10.5636   1
   1  -1   7 102.076 4.14032  -2
  -1   1   7 102.076 4.14032   1
   1  -1   6 304.659 5.86282  -2
  -1   1   6 304.659 5.86282   1
  -1  -1  -5 68.8142 2.92438  -2
   1   1  -5 68.8142 2.92438   1
  -1   1  -4 7766.21 21.1372  -2
   1  -1  -4 7766.21 21.1372   1
  -1   1  -3 477.734 6.49519  -2
   1  -1  -3 477.734 6.49519   1
   1  -1  -2 1971.14 12.4370   1
   1  -1   2 2666.44 12.7813  -2
  -1   1   2 2666.44 12.7813   1
   1  -1  -1 456.708 3.64506   1
   1  -1   1 632.787 12.5018  -2
  -1   1   1 632.787 12.5018   1
  -1   1   0 10544.6 20.9520   1
  -1  -1  -1 540.924 4.33470   1
   1  -1   2 2807.06 17.3249   1
  -1   1   2 3249.15 21.4848  -2
   1  -1   2 3249.15 21.4848   1
   1  -1   3 1296.82 25.2871   1
  -1   1   3 1432.58 7.61789  -2
   1  -1   3 1432.58 7.61789   1
   1   1  -4 8308.24 25.7237  -2
  -1  -1  -4 8308.24 25.7237   1
   1   1  -5 162.451 5.67220  -2
  -1  -1  -5 162.451 5.67220   1
   1   1  -6 130.988 5.14664  -2
  -1  -1  -6 130.988 5.14664   1
   1   1  -7 81.4451 5.18566  -2
  -1  -1  -7 81.4451 5.18566   1
  -1   1   8 739.617 14.8524  -2
   1  -1   8 739.617 14.8524   1
  -1  -1   9 114.789 6.77675  -2
   1   1   9 114.789 6.77675   1
  -1   1  10 1387.47 19.4485  -2
   1  -1  10 1387.47 19.4485   1
  -1   1  11 8.62007 4.92835  -2
   1  -1  11 8.62007 4.92835   1
  -1   1  12 2231.53 23.7489  -2
   1  -1  12 2231.53 23.7489   1
  -1   1  13-1.84065 4.04533  -2
   1  -1  13-1.84065 4.04533   1
   1   1 -14 493.115 15.8308  -2
  -1  -1 -14 493.115 15.8308   1
  -1   1  15 22.5530 7.32496  -2
   1  -1  15 22.5530 7.32496   1
   1   1 -16 825.778 29.0860  -2
  -1  -1 -16 825.778 29.0860   1
   1   1 -17 12.3110 11.8508  -2
  -1  -1 -17 12.3110 11.8508   1
   1   1 -18 16.5215 13.6671  -2
  -1  -1 -18 16.5215 13.6671   1
  -1   1  19 6.59232 23.5907  -2
   1  -1  19 6.59232 23.5907   1
  -1   1  20 0.00354 25.7976  -2
   1  -1  20 0.00354 25.7976   1
   1   2  20 164.784 36.8896  -2
  -1  -2  20 164.784 36.8896   1
   1   2  19-15.6327 23.4262  -2
  -1  -2  19-15.6327 23.4262   1
   1   2  18 372.150 25.3358  -2
  -1  -2  18 372.150 25.3358   1
   1   2  17 11.6699 12.6334  -2
  -1  -2  17 11.6699 12.6334   1
   1  -2  16 576.870 23.2477  -2
  -1   2  16 576.870 23.2477   1
   1  -2  15 19.9141 13.7113  -2
  -1   2  15 19.9141 13.7113   1
   1  -2  14 23.7852 12.4537  -2
  -1   2  14 23.7852 12.4537   1
   1  -2  13 169.159 9.39231  -2
  -1   2  13 169.159 9.39231   1
  -1   2 -12 108.218 7.03740  -2
   1  -2 -12 108.218 7.03740   1
   1   2  11 68.2030 8.39735  -2
  -1  -2  11 68.2030 8.39735   1
   1  -2  10 1852.46 22.8198  -2
  -1   2  10 1852.46 22.8198   1
   1   2   9 283.540 7.76124  -2
  -1  -2   9 283.540 7.76124   1
  -1   2  -8 844.334 12.3358  -2
   1  -2  -8 844.334 12.3358   1
  -1   2  -7 177.899 4.98998  -2
   1  -2  -7 177.899 4.98998   1
   1  -2   6 8236.05 27.6430  -2
  -1   2   6 8236.05 27.6430   1
  -1   2  -5 2.77028 1.81165  -2
   1  -2  -5 2.77028 1.81165   1
   1  -2   4 3406.57 13.6729  -2
  -1   2   4 3406.57 13.6729   1
  -1  -2  -3 1707.59 7.55360  -2
   1   2  -3 1707.59 7.55360   1
   1  -2  -2 6084.59 18.4665   1
  -1   2  -2 7601.66 18.3186  -2
   1  -2  -2 7601.66 18.3186   1
  -1   2   1 509.011 4.34299   1
   1   2   1 577.287 5.37649  -2
  -1  -2   1 577.287 5.37649   1
  -1   2   0 4.66895 0.94987   1
   1  -2   0 1.50669 3.16021  -2
  -1   2   0 1.50669 3.16021   1
   1  -2   1 125.511 1.96628   1
   1  -2   2 5186.92 13.4430   1
  -1   2   2 6898.73 19.1180  -2
   1  -2   2 6898.73 19.1180   1
  -1  -2   3 495.994 5.82319  -2
   1   2   3 495.994 5.82319   1
   1  -2  -4 2780.77 9.19905  -2
  -1   2  -4 2780.77 9.19905   1
  -1  -2   5 5.84046 1.57082  -2
   1   2   5 5.84046 1.57082   1
  -1  -2   6 4879.81 29.3060  -2
   1   2   6 4879.81 29.3060   1
   1   2  -7 213.092 5.54919  -2
  -1  -2  -7 213.092 5.54919   1
  -1   2   8 900.037 11.5934  -2
   1  -2   8 900.037 11.5934   1
   1   2  -9 168.160 7.26553  -2
  -1  -2  -9 168.160 7.26553   1
   1   2 -10 2632.51 27.4982  -2
  -1  -2 -10 2632.51 27.4982   1
  -1   2  11 68.1625 6.05459  -2
   1  -2  11 68.1625 6.05459   1
  -1   2  12 70.9458 4.57323  -2
   1  -2  12 70.9458 4.57323   1
   1   2 -13 163.361 10.6151  -2
  -1  -2 -13 163.361 10.6151   1
   1  -2 -14 7.63968 6.74797  -2
  -1   2 -14 7.63968 6.74797   1
  -1  -2  15 49.1178 8.56495  -2
   1   2  15 49.1178 8.56495   1
  -1  -2  16 456.567 21.0491  -2
   1   2  16 456.567 21.0491   1
  -1   2  17 2.41108 11.4507  -2
   1  -2  17 2.41108 11.4507   1
  -1  -2  18 322.296 23.3735  -2
   1   2  18 322.296 23.3735   1
  -1   2  19 8.58718 24.3111  -2
   1  -2  19 8.58718 24.3111   1
  -1   2  20 177.868 35.1590  -2
   1  -2  20 177.868 35.1590   1
   1   3  19 126.252 35.1785  -2
  -1  -3  19 126.252 35.1785   1
   1   3  18 0.34530 16.6562  -2
  -1  -3  18 0.34530 16.6562   1
   1  -3  17 41.6480 16.0834  -2
  -1   3  17 41.6480 16.0834   1
   1   3  16 697.110 24.6847  -2
  -1  -3  16 697.110 24.6847   1
   1  -3  15 94.1501 13.6885  -2
  -1   3  15 94.1501 13.6885   1
   1  -3  14 293.782 17.4344  -2
  -1   3  14 293.782 17.4344   1
  -1  -3 -13 7.80304 5.98522  -2
   1   3 -13 7.80304 5.98522   1
  -1  -3 -12 1746.86 27.6894  -2
   1   3 -12 1746.86 27.6894   1
   1   3  11 22.6900 4.94200  -2
  -1  -3  11 22.6900 4.94200   1
   1   3  10 813.035 12.7253  -2
  -1  -3  10 813.035 12.7253   1
   1  -3   9 277.316 7.71496  -2
  -1   3   9 277.316 7.71496   1
  -1   3  -8 151.898 5.42030  -2
   1  -3  -8 151.898 5.42030   1
  -1  -3  -7 568.221 8.56941  -2
   1   3  -7 568.221 8.56941   1
   1  -3   6 30.5549 2.71953  -2
  -1   3   6 30.5549 2.71953   1
  -1   3  -5 573.007 5.36657  -2
   1  -3  -5 573.007 5.36657   1
   1  -3   4 2453.39 9.16199  -2
  -1   3   4 2453.39 9.16199   1
   1  -3  -3 1655.79 29.3604   1
   1  -3   3 1907.45 7.47588  -2
  -1   3   3 1907.45 7.47588   1
  -1  -3   2 94.1574 2.27070   1
  -1   3  -2 261.411 3.87989  -2
   1  -3  -2 261.411 3.87989   1
   1   3  -1 73.5506 3.01496   1
  -1  -3  -1 91.7588 1.97526  -2
   1   3  -1 91.7588 1.97526   1
  -1   3   0 10415.1 33.5711   1
  -1  -3   0 12651.7 33.4387  -2
   1   3   0 12651.7 33.4387   1
   1  -3   1 81.8353 1.57157   1
  -1  -3   1 110.184 4.67451  -2
   1   3   1 110.184 4.67451   1
  -1   3  -2 598.894 7.09477   1
  -1   3   2 578.398 4.46794  -2
   1  -3   2 578.398 4.46794   1
  -1  -3  -3 1127.33 9.74751   1
   1  -3  -3 1575.22 9.29269  -2
  -1   3  -3 1575.22 9.29269   1
   1   3  -4 3128.83 13.3444  -2
  -1  -3  -4 3128.83 13.3444   1
   1  -3  -5 1169.12 7.98080  -2
  -1   3  -5 1169.12 7.98080   1
   1   3  -6 7.72788 1.76583  -2
  -1  -3  -6 7.72788 1.76583   1
   1  -3  -7 956.381 8.24881  -2
  -1   3  -7 956.381 8.24881   1
  -1  -3   8 70.4138 3.44565  -2
   1   3   8 70.4138 3.44565   1
   1   3  -9 237.801 6.32109  -2
  -1  -3  -9 237.801 6.32109   1
  -1  -3  10 707.799 12.2275  -2
   1   3  10 707.799 12.2275   1
  -1   3  11 7.54190 3.26970  -2
   1  -3  11 7.54190 3.26970   1
  -1  -3  12 1585.02 25.1636  -2
   1   3  12 1585.02 25.1636   1
  -1  -3  13 0.00430 5.91037  -2
   1   3  13 0.00430 5.91037   1
   1   3 -14 340.176 13.9118  -2
  -1  -3 -14 340.176 13.9118   1
   1   3 -15 129.899 10.7316  -2
  -1  -3 -15 129.899 10.7316   1
  -1  -3  16 696.552 24.3682  -2
   1   3  16 696.552 24.3682   1
  -1   3  17 33.2265 15.7304  -2
   1  -3  17 33.2265 15.7304   1
  -1  -3  18-6.70413 15.0321  -2
   1   3  18-6.70413 15.0321   1
  -1   3  19 103.283 31.5475  -2
   1  -3  19 103.283 31.5475   1
   1   4  19-27.1461 27.1065  -2
  -1  -4  19-27.1461 27.1065   1
  -1   4 -18 230.671 23.8803  -2
   1  -4 -18 230.671 23.8803   1
  -1   4 -17 30.2626 16.0077  -2
   1  -4 -17 30.2626 16.0077   1
  -1  -4 -16 377.050 25.9398  -2
   1   4 -16 377.050 25.9398   1
  -1  -4 -15 68.6591 13.0776  -2
   1   4 -15 68.6591 13.0776   1
   1  -4  14 12.0538 9.91249  -2
  -1   4  14 12.0538 9.91249   1
  -1  -4 -13 656.218 17.3340  -2
   1   4 -13 656.218 17.3340   1
   1  -4  12 35.2558 5.52001  -2
  -1   4  12 35.2558 5.52001   1
  -1   4 -11 387.810 8.98735  -2
   1  -4 -11 387.810 8.98735   1
  -1  -4 -10 1471.12 15.6272  -2
   1   4 -10 1471.12 15.6272   1
  -1   4  -9 925.018 12.4457  -2
   1  -4  -9 925.018 12.4457   1
   1  -4   8 484.991 8.63610  -2
  -1   4   8 484.991 8.63610   1
   1  -4   7 9.67792 2.73520  -2
  -1   4   7 9.67792 2.73520   1
  -1   4  -6 5569.97 20.8237  -2
   1  -4  -6 5569.97 20.8237   1
  -1   4  -5 63.0469 2.58227  -2
   1  -4  -5 63.0469 2.58227   1
  -1   4  -4 1051.05 7.64872  -2
   1  -4  -4 1051.05 7.64872   1
  -1  -4   3 961.735 12.6071   1
   1  -4   3 1357.55 7.42935  -2
  -1   4   3 1357.55 7.42935   1
   1  -4  -2 2139.74 33.0447   1
  -1  -4  -2 2254.34 7.65589  -2
   1   4  -2 2254.34 7.65589   1
   1   4  -1 1869.30 16.7520   1
  -1   4  -1 2152.03 10.2213  -2
   1  -4  -1 2152.03 10.2213   1
   1  -4   0 1.08094 0.93562   1
  -1  -4   0 6.04862 1.17581  -2
   1   4   0 6.04862 1.17581   1
   1  -4   1 1062.98 11.6460   1
   1   4  -1 1643.72 9.20178  -2
  -1  -4  -1 1643.72 9.20178   1
  -1   4  -2 1106.47 15.9754   1
   1   4  -2 1670.29 7.11473  -2
  -1  -4  -2 1670.29 7.11473   1
  -1   4  -3 1239.60 27.3317   1
  -1  -4   3 1621.09 7.39762  -2
   1   4   3 1621.09 7.39762   1
  -1  -4  -4 326.754 8.58874   1
  -1  -4   4 595.641 5.42942  -2
   1   4   4 595.641 5.42942   1
  -1  -4   5 189.365 3.85687  -2
   1   4   5 189.365 3.85687   1
  -1  -4   6 4918.56 17.1156  -2
   1   4   6 4918.56 17.1156   1
   1  -4  -7 29.9026 2.10428  -2
  -1   4  -7 29.9026 2.10428   1
  -1  -4   8 651.165 5.70937  -2
   1   4   8 651.165 5.70937   1
   1   4  -9 552.361 7.25171  -2
  -1  -4  -9 552.361 7.25171   1
  -1   4  10 1742.94 14.0913  -2
   1  -4  10 1742.94 14.0913   1
  -1   4  11 230.320 6.13556  -2
   1  -4  11 230.320 6.13556   1
  -1  -4  12 14.6340 6.00916  -2
   1   4  12 14.6340 6.00916   1
   1   4 -13 530.111 18.6255  -2
  -1  -4 -13 530.111 18.6255   1
   1  -4 -14 32.7610 8.12689  -2
  -1   4 -14 32.7610 8.12689   1
   1   4 -15 125.834 11.0828  -2
  -1  -4 -15 125.834 11.0828   1
  -1  -4  16 270.794 22.5757  -2
   1   4  16 270.794 22.5757   1
   1  -4 -17 43.9743 16.6429  -2
  -1   4 -17 43.9743 16.6429   1
   1   4 -18 265.771 23.6872  -2
  -1  -4 -18 265.771 23.6872   1
  -1   4  19 30.2281 26.4383  -2
   1  -4  19 30.2281 26.4383   1
  -1  -5 -18-4.17092 16.1847  -2
   1   5 -18-4.17092 16.1847   1
  -1   5 -17 84.7262 18.8150  -2
   1  -5 -17 84.7262 18.8150   1
   1   5  16 343.969 25.0625  -2
  -1  -5  16 343.969 25.0625   1
   1  -5  15 246.695 20.4205  -2
  -1   5  15 246.695 20.4205   1
   1  -5  14 164.972 11.7545  -2
  -1   5  14 164.972 11.7545   1
   1  -5  13 4.64418 6.33599  -2
  -1   5  13 4.64418 6.33599   1
  -1  -5 -12 950.039 14.2826  -2
   1   5 -12 950.039 14.2826   1
   1  -5  11 22.1291 4.26492  -2
  -1   5  11 22.1291 4.26492   1
   1  -5  10 428.560 8.99881  -2
  -1   5  10 428.560 8.99881   1
  -1   5  -9 583.526 9.36713  -2
   1  -5  -9 583.526 9.36713   1
  -1   5  -8 104.228 5.70933  -2
   1  -5  -8 104.228 5.70933   1
  -1   5  -7 2223.80 15.0955  -2
   1  -5  -7 2223.80 15.0955   1
   1  -5   6 59.0926 3.32023  -2
  -1   5   6 59.0926 3.32023   1
  -1   5  -5 1167.98 9.11045  -2
   1  -5  -5 1167.98 9.11045   1
   1  -5   4 1718.92 8.55967  -2
  -1   5   4 1718.92 8.55967   1
   1  -5   3 1186.52 5.80988  -2
  -1   5   3 1186.52 5.80988   1
   1  -5  -2 380.362 14.3793   1
   1   5   2 554.693 4.09269  -2
  -1  -5   2 554.693 4.09269   1
   1  -5  -1 53.8584 4.09722   1
  -1  -5  -1 59.6253 2.75617  -2
   1   5  -1 59.6253 2.75617   1
  -1   5   0 7800.74 11.5507  -2
   1  -5   0 7800.74 11.5507   1
   1  -5   1 9.16968 2.79874   1
  -1  -5   1 31.2747 1.98846  -2
   1   5   1 31.2747 1.98846   1
  -1  -5   2 651.291 4.72309  -2
   1   5   2 651.291 4.72309   1
  -1   5  -3 1623.45 34.9972   1
   1   5  -3 1702.21 8.50210  -2
  -1  -5  -3 1702.21 8.50210   1
   1   5  -4 1488.67 8.15885  -2
  -1  -5  -4 1488.67 8.15885   1
  -1   5   5 1174.88 7.82050  -2
   1  -5   5 1174.88 7.82050   1
  -1  -5   6 68.1518 2.51658  -2
   1   5   6 68.1518 2.51658   1
   1  -5  -7 1800.71 12.1656  -2
  -1   5  -7 1800.71 12.1656   1
  -1   5   8 84.0458 3.35032  -2
   1  -5   8 84.0458 3.35032   1
  -1   5   9 659.829 6.35644  -2
   1  -5   9 659.829 6.35644   1
   1   5 -10 424.367 7.19247  -2
  -1  -5 -10 424.367 7.19247   1
  -1  -5  11 37.3405 3.77456  -2
   1   5  11 37.3405 3.77456   1
  -1  -5  12 917.693 15.1435  -2
   1   5  12 917.693 15.1435   1
   1  -5 -13 5.95273 6.80935  -2
  -1   5 -13 5.95273 6.80935   1
   1   5 -14 104.207 11.7404  -2
  -1  -5 -14 104.207 11.7404   1
  -1  -5  15 257.511 16.4787  -2
   1   5  15 257.511 16.4787   1
   1  -5 -16 296.696 17.5020  -2
  -1   5 -16 296.696 17.5020   1
  -1   5  17 78.9578 17.8114  -2
   1  -5  17 78.9578 17.8114   1
   1   5 -18-8.12175 16.3503  -2
  -1  -5 -18-8.12175 16.3503   1
   1   6  18 56.9687 18.3431  -2
  -1  -6  18 56.9687 18.3431   1
   1   6  17 7.54397 14.7840  -2
  -1  -6  17 7.54397 14.7840   1
   1   6  16 94.5124 16.9625  -2
  -1  -6  16 94.5124 16.9625   1
   1   6  15 82.3894 17.2029  -2
  -1  -6  15 82.3894 17.2029   1
  -1  -6 -14 6.25851 12.3722  -2
   1   6 -14 6.25851 12.3722   1
   1  -6  13 941.274 20.8895  -2
  -1   6  13 941.274 20.8895   1
  -1   6 -12 53.4425 7.67373  -2
   1  -6 -12 53.4425 7.67373   1
  -1  -6 -11 450.613 12.1695  -2
   1   6 -11 450.613 12.1695   1
  -1   6 -10 569.718 13.1558  -2
   1  -6 -10 569.718 13.1558   1
   1  -6   9 1080.03 16.1199  -2
  -1   6   9 1080.03 16.1199   1
   1  -6   8 122.637 5.37708  -2
  -1   6   8 122.637 5.37708   1
  -1   6  -7 35.8688 3.78739  -2
   1  -6  -7 35.8688 3.78739   1
   1  -6   6 2593.74 17.7699  -2
  -1   6   6 2593.74 17.7699   1
  -1   6  -5 46.4341 2.74864  -2
   1  -6  -5 46.4341 2.74864   1
   1  -6   4 385.975 4.63722  -2
  -1   6   4 385.975 4.63722   1
  -1   6  -3 1392.96 6.44244  -2
   1  -6  -3 1392.96 6.44244   1
   1   6   2 155.135 3.19530  -2
  -1  -6   2 155.135 3.19530   1
  -1   6   1 3090.17 55.7207   1
   1  -6   1 2505.67 18.4587  -2
  -1   6   1 2505.67 18.4587   1
  -1   6   0 13.3665 5.83227   1
  -1  -6   0 35.8646 2.83105  -2
   1   6   0 35.8646 2.83105   1
   1   6  -1 3427.96 17.7465  -2
  -1  -6  -1 3427.96 17.7465   1
  -1   6  -2 30.2884 9.03428   1
  -1   6   2 76.1073 3.07004  -2
   1  -6   2 76.1073 3.07004   1
   1  -6  -3 1604.15 8.70057  -2
  -1   6  -3 1604.15 8.70057   1
  -1   6  -4 173.503 14.5876   1
  -1   6   4 263.714 4.25722  -2
   1  -6   4 263.714 4.25722   1
   1   6  -5 39.6018 2.87677  -2
  -1  -6  -5 39.6018 2.87677   1
   1  -6  -6 2512.45 15.4024  -2
  -1   6  -6 2512.45 15.4024   1
   1   6  -7 126.324 4.93804  -2
  -1  -6  -7 126.324 4.93804   1
  -1  -6   8 129.113 4.93229  -2
   1   6   8 129.113 4.93229   1
   1  -6  -9 834.837 9.89377  -2
  -1   6  -9 834.837 9.89377   1
   1   6 -10 646.179 6.93152  -2
  -1  -6 -10 646.179 6.93152   1
  -1  -6  11 261.745 8.41536  -2
   1   6  11 261.745 8.41536   1
   1   6 -12 13.8161 6.66042  -2
  -1  -6 -12 13.8161 6.66042   1
   1   6 -13 795.473 17.3376  -2
  -1  -6 -13 795.473 17.3376   1
  -1  -6  14 18.0945 10.0433  -2
   1   6  14 18.0945 10.0433   1
  -1  -6  15 144.932 14.7085  -2
   1   6  15 144.932 14.7085   1
  -1  -6  16 100.755 14.2231  -2
   1   6  16 100.755 14.2231   1
   1   6 -17 43.2789 17.0766  -2
  -1  -6 -17 43.2789 17.0766   1
   1   6 -18 59.7489 19.0836  -2
  -1  -6 -18 59.7489 19.0836   1
   1  -7  17 76.5546 18.6492  -2
  -1   7  17 76.5546 18.6492   1
   1   7  16 129.915 19.5010  -2
  -1  -7  16 129.915 19.5010   1
   1   7  15 267.361 22.3382  -2
  -1  -7  15 267.361 22.3382   1
  -1   7 -14 35.3327 13.9330  -2
   1  -7 -14 35.3327 13.9330   1
   1  -7  13 20.7489 10.6575  -2
  -1   7  13 20.7489 10.6575   1
   1  -7  12 326.195 12.2821  -2
  -1   7  12 326.195 12.2821   1
   1  -7  11 36.1159 6.19216  -2
  -1   7  11 36.1159 6.19216   1
   1   7  10 91.2111 8.62789  -2
  -1  -7  10 91.2111 8.62789   1
  -1   7  -9 628.394 12.1729  -2
   1  -7  -9 628.394 12.1729   1
   1  -7   8 22.6021 4.78598  -2
  -1   7   8 22.6021 4.78598   1
   1  -7   7 1533.55 16.1703  -2
  -1   7   7 1533.55 16.1703   1
  -1  -7  -6 46.3385 3.80288  -2
   1   7  -6 46.3385 3.80288   1
   1  -7   5 992.136 8.94955  -2
  -1   7   5 992.136 8.94955   1
   1   7   4 599.186 5.97768  -2
  -1  -7   4 599.186 5.97768   1
   1   7   3 1807.97 7.65428  -2
  -1  -7   3 1807.97 7.65428   1
  -1   7  -2 173.217 4.23301  -2
   1  -7  -2 173.217 4.23301   1
  -1   7   1 12.5345 9.99870   1
   1   7   1 39.5590 2.95686  -2
  -1  -7   1 39.5590 2.95686   1
  -1   7   0 1626.79 44.2347   1
   1   7   0 2015.12 12.1808  -2
  -1  -7   0 2015.12 12.1808   1
  -1   7  -1 95.3609 13.2092   1
   1   7  -1 85.5442 3.74181  -2
  -1  -7  -1 85.5442 3.74181   1
  -1   7   2 152.482 3.83435  -2
   1  -7   2 152.482 3.83435   1
  -1  -7   3 1606.88 8.78121  -2
   1   7   3 1606.88 8.78121   1
  -1   7  -4 658.375 27.4819   1
   1   7  -4 798.345 7.59893  -2
  -1  -7  -4 798.345 7.59893   1
   1  -7  -5 1294.24 12.0497  -2
  -1   7  -5 1294.24 12.0497   1
   1  -7  -6 54.7154 4.33116  -2
  -1   7  -6 54.7154 4.33116   1
   1  -7  -7 2017.41 22.5498  -2
  -1   7  -7 2017.41 22.5498   1
   1   7  -8 36.4975 4.17376  -2
  -1  -7  -8 36.4975 4.17376   1
   1  -7  -9 632.433 10.8896  -2
  -1   7  -9 632.433 10.8896   1
   1   7 -10 117.277 5.62592  -2
  -1  -7 -10 117.277 5.62592   1
  -1   7  11 24.4242 6.19211  -2
   1  -7  11 24.4242 6.19211   1
  -1  -7  12 235.915 15.8050  -2
   1   7  12 235.915 15.8050   1
   1   7 -13 30.8195 11.0376  -2
  -1  -7 -13 30.8195 11.0376   1
   1   7 -14 60.1867 11.5486  -2
  -1  -7 -14 60.1867 11.5486   1
  -1  -7  15 242.264 16.3144  -2
   1   7  15 242.264 16.3144   1
   1  -7 -16 170.810 15.9010  -2
  -1   7 -16 170.810 15.9010   1
  -1   7  17 94.3789 18.3027  -2
   1  -7  17 94.3789 18.3027   1
  -1   8 -17 29.3063 17.5389  -2
   1  -8 -17 29.3063 17.5389   1
   1   8  16 23.4546 14.5759  -2
  -1  -8  16 23.4546 14.5759   1
  -1  -8 -15 149.371 19.1802  -2
   1   8 -15 149.371 19.1802   1
  -1   8 -14 3.48907 12.8496  -2
   1  -8 -14 3.48907 12.8496   1
  -1  -8 -13 773.345 25.1525  -2
   1   8 -13 773.345 25.1525   1
  -1  -8 -12 5.14590 6.77981  -2
   1   8 -12 5.14590 6.77981   1
  -1   8 -11 418.403 13.0166  -2
   1  -8 -11 418.403 13.0166   1
  -1   8 -10 119.741 6.99588  -2
   1  -8 -10 119.741 6.99588   1
   1  -8   9 1117.57 19.9369  -2
  -1   8   9 1117.57 19.9369   1
  -1  -8  -8 9.40629 5.72406  -2
   1   8  -8 9.40629 5.72406   1
  -1   8  -7 11.8338 3.99767  -2
   1  -8  -7 11.8338 3.99767   1
  -1  -8  -6 481.199 7.49993  -2
   1   8  -6 481.199 7.49993   1
  -1   8  -5 7.20805 2.28865  -2
   1  -8  -5 7.20805 2.28865   1
  -1  -8  -4 32.0709 2.20712  -2
   1   8  -4 32.0709 2.20712   1
   1   8   3 1582.78 8.12697  -2
  -1  -8   3 1582.78 8.12697   1
  -1  -8  -2 117.617 5.04765  -2
   1   8  -2 117.617 5.04765   1
  -1   8   1 2130.20 55.5990   1
   1  -8   1 2489.27 17.2206  -2
  -1   8   1 2489.27 17.2206   1
  -1   8   0 2.63452 7.59502   1
  -1   8   0 10.3116 3.33061  -2
   1  -8   0 10.3116 3.33061   1
  -1   8  -1 2200.66 54.6728   1
  -1  -8   1 2501.33 19.1767  -2
   1   8   1 2501.33 19.1767   1
   1   8  -2 62.8899 4.43815  -2
  -1  -8  -2 62.8899 4.43815   1
  -1   8   3 1720.36 13.7024  -2
   1  -8   3 1720.36 13.7024   1
   1  -8  -4 16.9251 3.19721  -2
  -1   8  -4 16.9251 3.19721   1
  -1  -8   5 7.93994 2.66157  -2
   1   8   5 7.93994 2.66157   1
  -1   8   6 358.624 7.31041  -2
   1  -8   6 358.624 7.31041   1
  -1  -8   7 69.8964 5.04188  -2
   1   8   7 69.8964 5.04188   1
  -1  -8   8 19.4978 5.55994  -2
   1   8   8 19.4978 5.55994   1
   1  -8  -9 707.623 13.1231  -2
  -1   8  -9 707.623 13.1231   1
   1   8 -10 293.182 9.13965  -2
  -1  -8 -10 293.182 9.13965   1
  -1  -8  11 227.578 11.6858  -2
   1   8  11 227.578 11.6858   1
   1  -8 -12-8.11032 8.56070  -2
  -1   8 -12-8.11032 8.56070   1
   1   8 -13 726.696 24.9865  -2
  -1  -8 -13 726.696 24.9865   1
   1   8 -14 22.8662 11.1761  -2
  -1  -8 -14 22.8662 11.1761   1
  -1   8  15 138.665 14.6705  -2
   1  -8  15 138.665 14.6705   1
  -1  -8  16 35.2257 11.8497  -2
   1   8  16 35.2257 11.8497   1
   1  -8 -17 59.3308 21.7892  -2
  -1   8 -17 59.3308 21.7892   1
  -1   9 -17 147.236 24.4839  -2
   1  -9 -17 147.236 24.4839   1
   1  -9  16 45.2981 18.2070  -2
  -1   9  16 45.2981 18.2070   1
  -1   9 -15 273.450 21.7408  -2
   1  -9 -15 273.450 21.7408   1
  -1   9 -14-0.89421 13.2073  -2
   1  -9 -14-0.89421 13.2073   1
  -1   9 -13 14.5143 11.5930  -2
   1  -9 -13 14.5143 11.5930   1
  -1   9 -12 29.5470 8.82930  -2
   1  -9 -12 29.5470 8.82930   1
  -1   9 -11 39.5236 8.51403  -2
   1  -9 -11 39.5236 8.51403   1
  -1  -9 -10 2.29321 7.29162  -2
   1   9 -10 2.29321 7.29162   1
  -1   9  -9 549.088 12.8450  -2
   1  -9  -9 549.088 12.8450   1
   1   9   8 6.01129 6.19419  -2
  -1  -9   8 6.01129 6.19419   1
  -1  -9  -7 1419.53 14.5671  -2
   1   9  -7 1419.53 14.5671   1
  -1  -9  -6 7.87605 2.94420  -2
   1   9  -6 7.87605 2.94420   1
   1   9   5 1178.03 7.68643  -2
  -1  -9   5 1178.03 7.68643   1
   1   9   4 184.948 3.70661  -2
  -1  -9   4 184.948 3.70661   1
   1  -9  -3 1139.36 11.3730   1
  -1   9  -3 1753.39 14.5635  -2
   1  -9  -3 1753.39 14.5635   1
   1   9   2 16.7337 4.10289  -2
  -1  -9   2 16.7337 4.10289   1
  -1   9   1 12.3051 12.8669   1
  -1   9  -1 22.4479 3.84019  -2
   1  -9  -1 22.4479 3.84019   1
  -1   9   0 317.540 26.1353   1
  -1  -9   0 385.508 7.93352  -2
   1   9   0 385.508 7.93352   1
  -1   9  -1 29.9433 13.6373   1
   1   9  -1 50.2121 5.25598  -2
  -1  -9  -1 50.2121 5.25598   1
  -1   9  -2 33.8549 12.1354   1
  -1   9   2 37.6094 4.62989  -2
   1  -9   2 37.6094 4.62989   1
   1   9   3 1317.68 7.64295   1
   1   9  -3 1830.01 14.5006  -2
  -1  -9  -3 1830.01 14.5006   1
  -1   9   4 66.9683 5.54437  -2
   1  -9   4 66.9683 5.54437   1
   1   9  -5 1035.14 11.6593  -2
  -1  -9  -5 1035.14 11.6593   1
  -1  -9   6 2.14518 4.28741  -2
   1   9   6 2.14518 4.28741   1
   1   9  -7 1612.30 21.0504  -2
  -1  -9  -7 1612.30 21.0504   1
  -1   9   8 17.9080 5.40389  -2
   1  -9   8 17.9080 5.40389   1
   1   9  -9 639.762 12.1011  -2
  -1  -9  -9 639.762 12.1011   1
   1  -9 -10 21.3840 7.58104  -2
  -1   9 -10 21.3840 7.58104   1
   1  -9 -11 52.4352 8.57629  -2
  -1   9 -11 52.4352 8.57629   1
   1   9 -12 15.5931 9.37746  -2
  -1  -9 -12 15.5931 9.37746   1
  -1  -9  13 17.3182 10.0333  -2
   1   9  13 17.3182 10.0333   1
   1   9 -14-5.19353 10.8406  -2
  -1  -9 -14-5.19353 10.8406   1
   1   9 -15 207.762 17.8540  -2
  -1  -9 -15 207.762 17.8540   1
   1  -9 -16 45.4870 14.5880  -2
  -1   9 -16 45.4870 14.5880   1
   1  -9 -17 99.5669 23.3213  -2
  -1   9 -17 99.5669 23.3213   1
  -1 -10 -17 40.3308 28.3506  -2
   1  10 -17 40.3308 28.3506   1
  -1 -10 -16 26.4683 23.6649  -2
   1  10 -16 26.4683 23.6649   1
  -1  10 -15 66.8056 20.0772  -2
   1 -10 -15 66.8056 20.0772   1
   1 -10  14 20.5229 13.0737  -2
  -1  10  14 20.5229 13.0737   1
  -1  10 -13 618.273 24.4500  -2
   1 -10 -13 618.273 24.4500   1
   1 -10  12-1.00288 8.37861  -2
  -1  10  12-1.00288 8.37861   1
   1  10  11 222.253 12.3879  -2
  -1 -10  11 222.253 12.3879   1
   1 -10  10 21.2349 7.29087  -2
  -1  10  10 21.2349 7.29087   1
  -1 -10  -9 589.996 14.0764  -2
   1  10  -9 589.996 14.0764   1
   1 -10   8 6.07457 5.27511  -2
  -1  10   8 6.07457 5.27511   1
  -1 -10  -7 26.9030 4.95099  -2
   1  10  -7 26.9030 4.95099   1
   1  10   6 33.8329 3.95597  -2
  -1 -10   6 33.8329 3.95597   1
  -1  10  -5 33.7505 3.23237  -2
   1 -10  -5 33.7505 3.23237   1
   1  10  -4 34.0750 4.60788   1
  -1 -10  -4 40.5422 3.98242  -2
   1  10  -4 40.5422 3.98242   1
   1  10   3 1109.19 12.2124  -2
  -1 -10   3 1109.19 12.2124   1
   1 -10   2 167.105 6.98377  -2
  -1  10   2 167.105 6.98377   1
  -1  10   1 647.740 37.5770   1
   1  10   1 802.387 12.8551  -2
  -1 -10   1 802.387 12.8551   1
  -1  10   0 106.581 20.8884   1
  -1 -10   0 157.315 6.96316  -2
   1  10   0 157.315 6.96316   1
  -1  10  -1 799.086 41.8603   1
  -1 -10   1 975.340 14.7224  -2
   1  10   1 975.340 14.7224   1
  -1  10   2 62.0514 5.54888  -2
   1 -10   2 62.0514 5.54888   1
  -1  10  -3 1159.14 46.9758   1
   1  10  -3 1328.46 16.4740  -2
  -1 -10  -3 1328.46 16.4740   1
   1 -10   4 4.97975 1.67992   1
  -1 -10   4 20.0820 6.07870  -2
   1  10   4 20.0820 6.07870   1
   1  10   5 48.6890 6.35326   1
  -1  10   5 61.3583 7.99304  -2
   1 -10   5 61.3583 7.99304   1
   1  10   6 25.7764 7.65291   1
  -1  10   6 42.1835 5.17600  -2
   1 -10   6 42.1835 5.17600   1
  -1 -10   7 65.8401 5.63513  -2
   1  10   7 65.8401 5.63513   1
   1  10  -8 12.5525 6.61196  -2
  -1 -10  -8 12.5525 6.61196   1
  -1  10   9 548.742 15.0008  -2
   1 -10   9 548.742 15.0008   1
  -1  10  10 14.1025 7.88870  -2
   1 -10  10 14.1025 7.88870   1
   1 -10 -11 123.997 10.6567  -2
  -1  10 -11 123.997 10.6567   1
  -1 -10  12 5.19947 9.09465  -2
   1  10  12 5.19947 9.09465   1
  -1  10  13 481.222 19.3865  -2
   1 -10  13 481.222 19.3865   1
   1 -10 -14 33.7840 13.4169  -2
  -1  10 -14 33.7840 13.4169   1
  -1  10  15 152.722 17.5549  -2
   1 -10  15 152.722 17.5549   1
  -1 -10  16 30.4800 19.0671  -2
   1  10  16 30.4800 19.0671   1
  -1  11 -15 123.029 44.5014  -2
   1 -11 -15 123.029 44.5014   1
   1 -11  14 4.92285 18.2744  -2
  -1  11  14 4.92285 18.2744   1
   1 -11  13-22.9235 11.4973  -2
  -1  11  13-22.9235 11.4973   1
  -1  11 -12 27.5827 12.1418  -2
   1 -11 -12 27.5827 12.1418   1
   1  11  11 18.8127 9.59748  -2
  -1 -11  11 18.8127 9.59748   1
   1 -11  10 11.6297 8.49686  -2
  -1  11  10 11.6297 8.49686   1
  -1 -11  -9 411.701 13.8238  -2
   1  11  -9 411.701 13.8238   1
  -1 -11  -8 18.1599 7.27761  -2
   1  11  -8 18.1599 7.27761   1
  -1  11   7 761.904 18.9130   1
   1 -11   7 882.550 19.1215  -2
  -1  11   7 882.550 19.1215   1
  -1 -11  -6 5.87943 4.39063  -2
   1  11  -6 5.87943 4.39063   1
   1  11   5 501.843 9.02698  -2
  -1 -11   5 501.843 9.02698   1
  -1 -11  -4 35.5537 5.84235  -2
   1  11  -4 35.5537 5.84235   1
   1  11   3 1191.30 13.1982  -2
  -1 -11   3 1191.30 13.1982   1
   1 -11   2 109.107 5.87388  -2
  -1  11   2 109.107 5.87388   1
  -1  11   1 23.5900 16.9042   1
  -1 -11  -1 10.8893 5.09001  -2
   1  11  -1 10.8893 5.09001   1
  -1  11   0 25.9148 17.2571   1
  -1 -11   0 14.5050 5.93270  -2
   1  11   0 14.5050 5.93270   1
  -1  11   1 11.7223 5.36706  -2
   1 -11   1 11.7223 5.36706   1
  -1  11   2 314.775 9.45019  -2
   1 -11   2 314.775 9.45019   1
   1 -11  -3 931.389 13.3394  -2
  -1  11  -3 931.389 13.3394   1
  -1  11  -4 9.74629 16.6449   1
  -1 -11   4 21.9255 7.31722  -2
   1  11   4 21.9255 7.31722   1
   1  11   5 303.715 4.90617   1
  -1  11   5 441.068 14.9027  -2
   1 -11   5 441.068 14.9027   1
  -1  11   6 9.88486 7.00128  -2
   1 -11   6 9.88486 7.00128   1
  -1 -11   7 950.821 17.6957  -2
   1  11   7 950.821 17.6957   1
   1  11  -8 9.04636 8.04759  -2
  -1 -11  -8 9.04636 8.04759   1
  -1  11   9 394.141 15.4256  -2
   1 -11   9 394.141 15.4256   1
  -1  11  10 16.7422 9.71914  -2
   1 -11  10 16.7422 9.71914   1
   1  11 -11 22.4594 11.6553  -2
  -1 -11 -11 22.4594 11.6553   1
  -1 -11  12 1.14300 11.6074  -2
   1  11  12 1.14300 11.6074   1
  -1 -11  13-1.40366 12.2880  -2
   1  11  13-1.40366 12.2880   1
  -1 -11  14 0.00321 15.6111  -2
   1  11  14 0.00321 15.6111   1
   1  11 -15 131.771 28.0212  -2
  -1 -11 -15 131.771 28.0212   1
  -1 -11  16 5.86054 26.0492  -2
   1  11  16 5.86054 26.0492   1
   1  12  13 292.000 27.3592  -2
  -1 -12  13 292.000 27.3592   1
  -1  12 -12-5.86537 16.6201  -2
   1 -12 -12-5.86537 16.6201   1
  -1  12 -11 107.373 16.1845  -2
   1 -12 -11 107.373 16.1845   1
  -1  12 -10 10.1177 11.6873  -2
   1 -12 -10 10.1177 11.6873   1
  -1 -12  -9 499.345 20.7285  -2
   1  12  -9 499.345 20.7285   1
   1 -12   8 75.8534 12.2614  -2
  -1  12   8 75.8534 12.2614   1
   1  12   7 4.80626 9.37540  -2
  -1 -12   7 4.80626 9.37540   1
   1  12   6 47.9838 11.3444  -2
  -1 -12   6 47.9838 11.3444   1
  -1 -12  -5 5.87722 6.14274  -2
   1  12  -5 5.87722 6.14274   1
  -1 -12  -4 90.1426 7.14048  -2
   1  12  -4 90.1426 7.14048   1
  -1 -12  -3 595.800 12.9370  -2
   1  12  -3 595.800 12.9370   1
  -1  12  -2 72.0404 5.87427  -2
   1 -12  -2 72.0404 5.87427   1
  -1  12   1 549.165 42.8537   1
  -1 -12  -1 855.795 15.4772  -2
   1  12  -1 855.795 15.4772   1
  -1  12   0 2.22147 19.6088   1
   1  12   0 13.6083 6.54797  -2
  -1 -12   0 13.6083 6.54797   1
  -1  12   1 795.483 14.5504  -2
   1 -12   1 795.483 14.5504   1
  -1  12  -2 87.7065 24.2066   1
   1  12  -2 155.834 8.22277  -2
  -1 -12  -2 155.834 8.22277   1
  -1  12  -3 409.870 41.8737   1
   1  12  -3 679.552 16.9255  -2
  -1 -12  -3 679.552 16.9255   1
  -1 -12   4 110.440 8.63205  -2
   1  12   4 110.440 8.63205   1
   1 -12  -5 19.2159 7.04090  -2
  -1  12  -5 19.2159 7.04090   1
  -1  12   6 17.6092 7.77631  -2
   1 -12   6 17.6092 7.77631   1
  -1  12   7-1.81441 9.37363  -2
   1 -12   7-1.81441 9.37363   1
  -1 -12   8 56.4358 11.8449  -2
   1  12   8 56.4358 11.8449   1
  -1 -12   9 338.070 18.5477  -2
   1  12   9 338.070 18.5477   1
  -1 -12  10 3.14203 13.3958  -2
   1  12  10 3.14203 13.3958   1
  -1 -12  11 92.9658 17.5818  -2
   1  12  11 92.9658 17.5818   1
   1  12 -12-2.18912 14.2474  -2
  -1 -12 -12-2.18912 14.2474   1
  -1 -12  13 371.398 26.0346  -2
   1  12  13 371.398 26.0346   1
  -1 -12  14 41.5744 25.8477  -2
   1  12  14 41.5744 25.8477   1
  -1  13 -12 18.4856 18.6184  -2
   1 -13 -12 18.4856 18.6184   1
   1 -13  11 39.8981 14.9230  -2
  -1  13  11 39.8981 14.9230   1
   1  13  10 62.9328 15.3588  -2
  -1 -13  10 62.9328 15.3588   1
  -1 -13  -9 172.591 18.0026  -2
   1  13  -9 172.591 18.0026   1
  -1 -13  -8 108.463 15.1151  -2
   1  13  -8 108.463 15.1151   1
   1 -13   7 391.006 18.7885  -2
  -1  13   7 391.006 18.7885   1
  -1 -13  -6 11.5603 9.49040  -2
   1  13  -6 11.5603 9.49040   1
   1  13   5 98.6122 11.4109  -2
  -1 -13   5 98.6122 11.4109   1
   1  13   4 20.7667 6.98135  -2
  -1 -13   4 20.7667 6.98135   1
  -1 -13  -3 387.073 12.3258  -2
   1  13  -3 387.073 12.3258   1
   1  13   2 69.2045 7.86157  -2
  -1 -13   2 69.2045 7.86157   1
   1  13   1 19.1690 7.02096  -2
  -1 -13   1 19.1690 7.02096   1
  -1  13   0 74.0975 25.2904   1
  -1  13   0 132.632 8.78559  -2
   1 -13   0 132.632 8.78559   1
  -1  13  -1 42.4018 22.7062   1
  -1  13   1 17.4528 6.86129  -2
   1 -13   1 17.4528 6.86129   1
  -1  13  -2 22.4210 21.2679   1
  -1  13   2 76.4438 9.45076  -2
   1 -13   2 76.4438 9.45076   1
  -1  13   3 360.583 13.0660  -2
   1 -13   3 360.583 13.0660   1
  -1  13   4 41.1272 7.44196  -2
   1 -13   4 41.1272 7.44196   1
  -1  13   5 100.749 8.71395  -2
   1 -13   5 100.749 8.71395   1
  -1  13   6 13.1739 8.23423  -2
   1 -13   6 13.1739 8.23423   1
  -1 -13   7 342.276 18.0845  -2
   1  13   7 342.276 18.0845   1
   1  13  -8 31.8747 12.2082  -2
  -1 -13  -8 31.8747 12.2082   1
  -1 -13   9 163.578 18.5404  -2
   1  13   9 163.578 18.5404   1
  -1  13  10 19.2975 14.8178  -2
   1 -13  10 19.2975 14.8178   1
  -1 -13  11 70.1337 16.8969  -2
   1  13  11 70.1337 16.8969   1
  -1  13  12 76.6266 21.1560  -2
   1 -13  12 76.6266 21.1560   1
   1  13 -13 4.05543 34.0775  -2
  -1 -13 -13 4.05543 34.0775   1
  -1 -14 -10 21.3431 14.7558  -2
   1  14 -10 21.3431 14.7558   1
   1 -14   9 118.662 16.9167  -2
  -1  14   9 118.662 16.9167   1
   1 -14   8 83.3428 13.4253  -2
  -1  14   8 83.3428 13.4253   1
   1  14   7 20.2765 11.2509  -2
  -1 -14   7 20.2765 11.2509   1
  -1  14  -6 97.0116 12.6530  -2
   1 -14  -6 97.0116 12.6530   1
   1  14   5 6.07005 9.54343  -2
  -1 -14   5 6.07005 9.54343   1
   1 -14   4 46.1690 10.6953  -2
  -1  14   4 46.1690 10.6953   1
   1  14   3 250.994 14.4866  -2
  -1 -14   3 250.994 14.4866   1
  -1 -14  -2 67.3488 8.93044  -2
   1  14  -2 67.3488 8.93044   1
  -1 -14  -1 151.267 10.5093  -2
   1  14  -1 151.267 10.5093   1
   1  14   0 20.1091 9.51967  -2
  -1 -14   0 20.1091 9.51967   1
  -1 -14   1 180.437 10.9857  -2
   1  14   1 180.437 10.9857   1
  -1  14  -2 22.0425 22.3608   1
  -1  14   2 36.3135 8.91563  -2
   1 -14   2 36.3135 8.91563   1
  -1  14   3 238.482 11.1113  -2
   1 -14   3 238.482 11.1113   1
  -1  14   4 76.1955 8.80755  -2
   1 -14   4 76.1955 8.80755   1
   1 -14  -5 3.51752 7.52456  -2
  -1  14  -5 3.51752 7.52456   1
   1 -14  -6 134.158 13.8059  -2
  -1  14  -6 134.158 13.8059   1
  -1 -14   7 3.20013 13.1593  -2
   1  14   7 3.20013 13.1593   1
  -1 -14   8 78.1598 15.4983  -2
   1  14   8 78.1598 15.4983   1
  -1 -14   9 115.717 17.4273  -2
   1  14   9 115.717 17.4273   1
  -1 -14  10 45.8113 15.5391  -2
   1  14  10 45.8113 15.5391   1
   1  14 -11 0.04974 36.4149  -2
  -1 -14 -11 0.04974 36.4149   1
  -1 -15 -10 62.2731 35.4280  -2
   1  15 -10 62.2731 35.4280   1
  -1 -15  -9 47.6620 18.5060  -2
   1  15  -9 47.6620 18.5060   1
  -1 -15  -8 75.8716 13.5357  -2
   1  15  -8 75.8716 13.5357   1
   1 -15   7 111.970 14.0527  -2
  -1  15   7 111.970 14.0527   1
   1  15   6 19.7638 11.3189  -2
  -1 -15   6 19.7638 11.3189   1
  -1  15  -5 107.785 13.0676  -2
   1 -15  -5 107.785 13.0676   1
  -1 -15  -4 70.6189 12.0308  -2
   1  15  -4 70.6189 12.0308   1
   1  15   3 180.309 13.9934  -2
  -1 -15   3 180.309 13.9934   1
  -1 -15  -2 95.7090 16.8016  -2
   1  15  -2 95.7090 16.8016   1
  -1  15  -1 2.96279 9.68165  -2
   1 -15  -1 2.96279 9.68165   1
  -1  15   0 140.963 13.4305  -2
   1 -15   0 140.963 13.4305   1
  -1  15   1 14.1110 9.80001  -2
   1 -15   1 14.1110 9.80001   1
  -1 -15   2 106.857 11.7442  -2
   1  15   2 106.857 11.7442   1
  -1  15   3 175.959 11.4949  -2
   1 -15   3 175.959 11.4949   1
  -1 -15   4 71.9393 11.4627  -2
   1  15   4 71.9393 11.4627   1
  -1 -15   5 75.6548 12.4783  -2
   1  15   5 75.6548 12.4783   1
  -1 -15   6 3.78856 10.7660  -2
   1  15   6 3.78856 10.7660   1
  -1  15   7 125.242 15.5888  -2
   1 -15   7 125.242 15.5888   1
  -1  15   8 25.0251 12.3266  -2
   1 -15   8 25.0251 12.3266   1
   1  15  -9 1.32847 20.6948  -2
  -1 -15  -9 1.32847 20.6948   1
   1  15 -10 30.7212 37.7291  -2
  -1 -15 -10 30.7212 37.7291   1
   1  16   8-5.95755 27.6312  -2
  -1 -16   8-5.95755 27.6312   1
   1  16   7 1.04108 21.1890  -2
  -1 -16   7 1.04108 21.1890   1
   1  16   6 131.820 14.7620  -2
  -1 -16   6 131.820 14.7620   1
   1 -16   5 6.03760 13.1364  -2
  -1  16   5 6.03760 13.1364   1
  -1  16  -4 71.4033 15.3406  -2
   1 -16  -4 71.4033 15.3406   1
   1  16   3 58.4586 17.9454  -2
  -1 -16   3 58.4586 17.9454   1
   1  16   2 17.0965 14.8380  -2
  -1 -16   2 17.0965 14.8380   1
  -1 -16  -1 41.4136 12.6105  -2
   1  16  -1 41.4136 12.6105   1
  -1 -16   0-7.71209 11.1183  -2
   1  16   0-7.71209 11.1183   1
  -1 -16   1 27.5585 11.3692  -2
   1  16   1 27.5585 11.3692   1
  -1 -16   2 62.6140 16.1498  -2
   1  16   2 62.6140 16.1498   1
  -1  16   3 58.3185 13.1148  -2
   1 -16   3 58.3185 13.1148   1
  -1 -16   4 74.2731 15.2630  -2
   1  16   4 74.2731 15.2630   1
  -1 -16   5 10.5375 13.9702  -2
   1  16   5 10.5375 13.9702   1
   1  16  -6 115.415 17.4411  -2
  -1 -16  -6 115.415 17.4411   1
  -1  16   7 17.4137 14.8771  -2
   1 -16   7 17.4137 14.8771   1
  -1  16   8 64.0998 29.0394  -2
   1 -16   8 64.0998 29.0394   1
  -1  17  -3 24.1979 27.3393  -2
   1 -17  -3 24.1979 27.3393   1
   1  17   2 43.8584 14.7924  -2
  -1 -17   2 43.8584 14.7924   1
   1  17   1 10.5754 12.9898  -2
  -1 -17   1 10.5754 12.9898   1
  -1  17   0 139.770 22.9402  -2
   1 -17   0 139.770 22.9402   1
   1  17  -1 16.0511 16.4368  -2
  -1 -17  -1 16.0511 16.4368   1
  -1  17   2 82.3424 20.5839  -2
   1 -17   2 82.3424 20.5839   1
   1  17  -3 17.9151 18.3921  -2
  -1 -17  -3 17.9151 18.3921   1
   1  17  -4 47.4080 20.5172  -2
  -1 -17  -4 47.4080 20.5172   1
   2   0  18 46.8776 20.2397  -2
  -2   0  18 46.8776 20.2397   1
   2   0  16 424.851 33.0299  -2
  -2   0  16 424.851 33.0299   1
   2   0  14 380.414 28.1565  -2
  -2   0  14 380.414 28.1565   1
   2   0  12 2956.78 31.9894  -2
  -2   0  12 2956.78 31.9894   1
   2   0  10 1690.64 47.5956  -2
  -2   0  10 1690.64 47.5956   1
  -2   0  -8 747.604 20.5237  -2
   2   0  -8 747.604 20.5237   1
   2   0  -6 342.746 7.66045   1
   2   0   6 375.424 14.9325  -2
  -2   0   6 375.424 14.9325   1
   2   0  -4 1653.28 27.0225   1
   2   0   4 3162.78 41.6929  -2
  -2   0   4 3162.78 41.6929   1
   2   0  -2 663.907 7.68980   1
   2   0   0 11293.3 26.4309   1
   2   0   2 1744.63 10.4971   1
   2   0   4 3638.73 20.6141   1
  -2   0   4 4432.50 41.9950  -2
   2   0   4 4432.50 41.9950   1
  -2   0  -6 53.8611 4.80181   1
  -2   0   6 134.526 11.5630  -2
   2   0   6 134.526 11.5630   1
   2   0  -8 234.523 22.1242  -2
  -2   0  -8 234.523 22.1242   1
  -2   0  10 1379.33 32.4767  -2
   2   0  10 1379.33 32.4767   1
   2   0 -12 2730.94 44.5118  -2
  -2   0 -12 2730.94 44.5118   1
  -2   0  14 262.683 12.9643  -2
   2   0  14 262.683 12.9643   1
   2   0 -16 551.937 29.2624  -2
  -2   0 -16 551.937 29.2624   1
  -2   0  18 38.6083 19.1262  -2
   2   0  18 38.6083 19.1262   1
   2   1  19-6.60273 20.9108  -2
  -2  -1  19-6.60273 20.9108   1
   2  -1  18 466.517 23.1193  -2
  -2   1  18 466.517 23.1193   1
   2   1  17-12.6977 15.4245  -2
  -2  -1  17-12.6977 15.4245   1
   2   1  16 484.991 24.0599  -2
  -2  -1  16 484.991 24.0599   1
   2  -1  15-12.6400 13.5154  -2
  -2   1  15-12.6400 13.5154   1
   2  -1  14 37.4801 14.0905  -2
  -2   1  14 37.4801 14.0905   1
   2  -1  13 14.9831 12.2479  -2
  -2   1  13 14.9831 12.2479   1
  -2   1  12 54.3486 5.51462   1
   2   1  12 62.3673 12.6662  -2
  -2  -1  12 62.3673 12.6662   1
   2  -1  11 46.9146 6.23397  -2
  -2   1  11 46.9146 6.23397   1
   2  -1  10 2316.04 21.0001  -2
  -2   1  10 2316.04 21.0001   1
   2  -1   9 125.632 6.87488  -2
  -2   1   9 125.632 6.87488   1
  -2  -1  -8 930.171 13.4516  -2
   2   1  -8 930.171 13.4516   1
   2  -1  -7 26.8897 5.61105   1
  -2  -1  -7 42.7918 5.00351  -2
   2   1  -7 42.7918 5.00351   1
   2  -1  -6 5616.36 38.6583   1
  -2  -1  -6 9989.82 43.9908  -2
   2   1  -6 9989.82 43.9908   1
   2   1  -5 18.6751 2.63160   1
   2  -1   5 23.0180 5.01232  -2
  -2   1   5 23.0180 5.01232   1
   2   1  -4 2543.61 19.6396   1
   2   1   4 3265.90 26.2712  -2
  -2  -1   4 3265.90 26.2712   1
  -2   1   3 5.27895 1.37665   1
   2   1   3 29.1321 5.93253  -2
  -2  -1   3 29.1321 5.93253   1
  -2   1   2 4201.24 10.4319   1
  -2  -1   1 215.387 2.33715   1
   2   1   0 62.2406 1.92441   1
   2   1   1 12.9561 1.14758   1
   2   1   2 2502.86 9.36024   1
  -2   1   2 3171.89 27.9265  -2
   2  -1   2 3171.89 27.9265   1
   2  -1   3 59.0268 2.59421   1
  -2   1   3 51.9782 5.23712  -2
   2  -1   3 51.9782 5.23712   1
  -2  -1  -4 2604.03 18.0669   1
  -2   1   4 2759.52 24.9221  -2
   2  -1   4 2759.52 24.9221   1
  -2  -1  -5 2.34162 0.98192   1
   2   1  -5 9.84775 3.57062  -2
  -2  -1  -5 9.84775 3.57062   1
  -2  -1  -6 6495.20 23.1192   1
  -2   1   6 8377.22 40.7600  -2
   2  -1   6 8377.22 40.7600   1
  -2  -1  -7-0.31576 2.19764   1
   2   1  -7 4.35305 4.42610  -2
  -2  -1  -7 4.35305 4.42610   1
  -2   1   8 962.408 15.2189  -2
   2  -1   8 962.408 15.2189   1
   2   1  -9 55.2690 8.98690  -2
  -2  -1  -9 55.2690 8.98690   1
   2   1 -10 2781.48 32.7763  -2
  -2  -1 -10 2781.48 32.7763   1
  -2   1  11 24.3395 8.59090  -2
   2  -1  11 24.3395 8.59090   1
  -2  -1  12 15.5539 7.68533  -2
   2   1  12 15.5539 7.68533   1
  -2   1  13 7.43030 6.34955  -2
   2  -1  13 7.43030 6.34955   1
   2   1 -14 17.9463 6.23475  -2
  -2  -1 -14 17.9463 6.23475   1
  -2  -1  15 6.44524 7.68637  -2
   2   1  15 6.44524 7.68637   1
  -2   1  16 415.753 20.0056  -2
   2  -1  16 415.753 20.0056   1
  -2  -1  17 7.75215 13.3010  -2
   2   1  17 7.75215 13.3010   1
  -2  -1  18 469.030 23.2137  -2
   2   1  18 469.030 23.2137   1
  -2   1  19-22.6378 22.9318  -2
   2  -1  19-22.6378 22.9318   1
   2   2  20-8.25007 28.8183  -2
  -2  -2  20-8.25007 28.8183   1
   2  -2  19 58.8460 25.8014  -2
  -2   2  19 58.8460 25.8014   1
   2   2  18 12.8599 15.9876  -2
  -2  -2  18 12.8599 15.9876   1
   2  -2  17 30.7205 17.3502  -2
  -2   2  17 30.7205 17.3502   1
   2  -2  16 569.749 23.0384  -2
  -2   2  16 569.749 23.0384   1
   2  -2  15 74.8263 13.7071  -2
  -2   2  15 74.8263 13.7071   1
   2  -2  14 340.068 20.8522  -2
  -2   2  14 340.068 20.8522   1
   2  -2  13-2.45551 11.5006  -2
  -2   2  13-2.45551 11.5006   1
   2  -2  12 2051.39 37.2789  -2
  -2   2  12 2051.39 37.2789   1
  -2   2  11 3.04717 3.85363   1
   2  -2  11 12.3506 7.35319  -2
  -2   2  11 12.3506 7.35319   1
   2  -2  10 1141.03 15.2201  -2
  -2   2  10 1141.03 15.2201   1
   2   2   9 212.495 7.47473  -2
  -2  -2   9 212.495 7.47473   1
  -2   2  -8 278.748 6.58445  -2
   2  -2  -8 278.748 6.58445   1
  -2  -2  -7 529.754 6.87044  -2
   2   2  -7 529.754 6.87044   1
   2  -2  -6 143.748 9.23709   1
  -2  -2  -6 180.985 4.87358  -2
   2   2  -6 180.985 4.87358   1
   2  -2  -5 267.328 7.60706   1
   2  -2   5 382.239 6.13221  -2
  -2   2   5 382.239 6.13221   1
  -2   2   4 1266.01 9.60604   1
   2  -2   4 2120.40 15.9866  -2
  -2   2   4 2120.40 15.9866   1
   2  -2  -3 1351.68 7.82006   1
  -2   2  -3 1225.06 9.22168  -2
   2  -2  -3 1225.06 9.22168   1
   2  -2  -2 72.3025 1.30297   1
   2  -2   2 107.900 5.09911  -2
  -2   2   2 107.900 5.09911   1
  -2   2   1 1.55762 0.78014   1
   2  -2   1 2.96132 4.77980  -2
  -2   2   1 2.96132 4.77980   1
   2   2   0 7347.21 17.0759   1
   2   2   1 8.55272 1.05004   1
   2   2   2 117.678 3.14893   1
  -2   2   2 146.208 8.87563  -2
   2  -2   2 146.208 8.87563   1
  -2  -2  -3 19.2637 1.86961   1
  -2   2   3 366.718 13.0748  -2
   2  -2   3 366.718 13.0748   1
   2  -2   4 2952.85 13.8443   1
  -2   2   4 3162.23 23.6217  -2
   2  -2   4 3162.23 23.6217   1
   2   2   5 308.083 10.5735   1
  -2   2   5 485.124 7.86258  -2
   2  -2   5 485.124 7.86258   1
   2  -2   6 168.505 4.86236   1
  -2  -2   6 211.208 6.89362  -2
   2   2   6 211.208 6.89362   1
   2   2   7 550.461 11.7258   1
  -2   2   7 837.755 14.3708  -2
   2  -2   7 837.755 14.3708   1
  -2   2   8 105.998 5.86225  -2
   2  -2   8 105.998 5.86225   1
  -2  -2   9 320.870 10.0365  -2
   2   2   9 320.870 10.0365   1
  -2   2  10 840.246 14.6680  -2
   2  -2  10 840.246 14.6680   1
   2   2 -11 19.1715 5.28094  -2
  -2  -2 -11 19.1715 5.28094   1
  -2  -2  12 1785.46 23.5341  -2
   2   2  12 1785.46 23.5341   1
   2   2 -13 2.37245 5.95790  -2
  -2  -2 -13 2.37245 5.95790   1
   2   2 -14 372.175 9.95604  -2
  -2  -2 -14 372.175 9.95604   1
   2   2 -15 33.6938 8.43429  -2
  -2  -2 -15 33.6938 8.43429   1
   2   2 -16 782.979 23.4302  -2
  -2  -2 -16 782.979 23.4302   1
  -2   2  17 13.4959 11.8064  -2
   2  -2  17 13.4959 11.8064   1
   2  -2 -18 24.2934 16.6551  -2
  -2   2 -18 24.2934 16.6551   1
  -2   2  19 47.9352 26.4726  -2
   2  -2  19 47.9352 26.4726   1
   2   3  19 27.3333 30.3193  -2
  -2  -3  19 27.3333 30.3193   1
  -2  -3 -18 288.477 23.7333  -2
   2   3 -18 288.477 23.7333   1
   2   3  17-8.19882 22.6484  -2
  -2  -3  17-8.19882 22.6484   1
   2  -3  16 435.686 24.4029  -2
  -2   3  16 435.686 24.4029   1
   2  -3  15 69.8504 13.4708  -2
  -2   3  15 69.8504 13.4708   1
   2  -3  14 35.1494 11.8130  -2
  -2   3  14 35.1494 11.8130   1
   2   3  13 291.309 12.4759  -2
  -2  -3  13 291.309 12.4759   1
   2  -3 -12 82.6882 10.6132   1
   2  -3  12 115.679 14.8094  -2
  -2   3  12 115.679 14.8094   1
   2  -3  11 154.056 7.96636  -2
  -2   3  11 154.056 7.96636   1
   2  -3  10 1713.21 17.5437  -2
  -2   3  10 1713.21 17.5437   1
   2  -3   9 655.804 9.74466  -2
  -2   3   9 655.804 9.74466   1
  -2   3  -8 1130.52 11.0524  -2
   2  -3  -8 1130.52 11.0524   1
   2  -3   7 12.5031 2.67198  -2
  -2   3   7 12.5031 2.67198   1
  -2   3  -6 9584.53 24.1696  -2
   2  -3  -6 9584.53 24.1696   1
   2   3  -5 52.3094 2.42191   1
   2  -3   5 33.7597 3.01990  -2
  -2   3   5 33.7597 3.01990   1
  -2   3   4 2110.06 11.7743   1
   2   3   4 2506.62 14.8212  -2
  -2  -3   4 2506.62 14.8212   1
   2  -3  -3 97.2709 2.23427   1
   2  -3   3 413.892 5.17565  -2
  -2   3   3 413.892 5.17565   1
   2   3  -2 1827.44 7.08681   1
   2  -3   2 2150.05 14.0787  -2
  -2   3   2 2150.05 14.0787   1
  -2   3   1 312.199 2.76356   1
   2  -3   1 585.946 18.0905  -2
  -2   3   1 585.946 18.0905   1
   2   3   0 125.034 2.77524   1
   2  -3   0 153.062 10.3328  -2
  -2   3   0 153.062 10.3328   1
   2  -3   1 1017.92 6.74564   1
   2   3   2 1018.21 6.65036   1
  -2  -3   2 1671.51 22.0649  -2
   2   3   2 1671.51 22.0649   1
   2  -3   3 897.806 6.29383   1
  -2  -3   3 883.204 15.6493  -2
   2   3   3 883.204 15.6493   1
   2   3   4 1795.56 12.9347   1
   2   3  -4 2455.81 16.2508  -2
  -2  -3  -4 2455.81 16.2508   1
   2   3   5 21.6273 2.65845   1
  -2  -3   5 47.2795 4.00257  -2
   2   3   5 47.2795 4.00257   1
   2   3   6 6846.95 36.1058   1
  -2   3   6 9377.50 36.2331  -2
   2  -3   6 9377.50 36.2331   1
  -2   3   7 6.71796 3.24702  -2
   2  -3   7 6.71796 3.24702   1
  -2   3   8 1209.32 13.7863  -2
   2  -3   8 1209.32 13.7863   1
   2   3  -9 351.177 8.44222  -2
  -2  -3  -9 351.177 8.44222   1
   2   3 -10 1724.28 12.6869  -2
  -2  -3 -10 1724.28 12.6869   1
  -2  -3  11 98.2473 4.96991  -2
   2   3  11 98.2473 4.96991   1
  -2  -3  12 33.2106 4.75867  -2
   2   3  12 33.2106 4.75867   1
  -2  -3  13 403.868 13.5143  -2
   2   3  13 403.868 13.5143   1
  -2  -3  14 12.5548 7.89631  -2
   2   3  14 12.5548 7.89631   1
  -2   3  15 78.4018 9.68890  -2
   2  -3  15 78.4018 9.68890   1
  -2   3  16 341.956 17.4966  -2
   2  -3  16 341.956 17.4966   1
   2   3 -17 5.75803 14.9998  -2
  -2  -3 -17 5.75803 14.9998   1
  -2   3  18 168.793 19.4599  -2
   2  -3  18 168.793 19.4599   1
  -2   3  19 16.1154 25.4975  -2
   2  -3  19 16.1154 25.4975   1
   2   4  19 152.250 36.5605  -2
  -2  -4  19 152.250 36.5605   1
  -2   4 -18-2.43593 16.9089  -2
   2  -4 -18-2.43593 16.9089   1
  -2  -4 -17 74.6173 17.8211  -2
   2   4 -17 74.6173 17.8211   1
   2   4  16 409.973 34.2904  -2
  -2  -4  16 409.973 34.2904   1
   2  -4  15 221.882 15.7639  -2
  -2   4  15 221.882 15.7639   1
   2   4  14 172.664 13.9327  -2
  -2  -4  14 172.664 13.9327   1
   2   4  13-3.20315 8.67986  -2
  -2  -4  13-3.20315 8.67986   1
  -2  -4 -12 954.091 21.4096  -2
   2   4 -12 954.091 21.4096   1
   2  -4  11 22.6846 5.94921  -2
  -2   4  11 22.6846 5.94921   1
   2  -4  10 418.662 8.03834  -2
  -2   4  10 418.662 8.03834   1
  -2   4   9 156.864 20.5210   1
  -2   4  -9 369.121 6.83023  -2
   2  -4  -9 369.121 6.83023   1
  -2  -4  -8 328.124 5.80449  -2
   2   4  -8 328.124 5.80449   1
   2   4  -7 1235.75 18.8529   1
  -2   4  -7 1512.81 11.2186  -2
   2  -4  -7 1512.81 11.2186   1
   2   4  -6 615.101 9.44541   1
  -2  -4  -6 626.264 6.40661  -2
   2   4  -6 626.264 6.40661   1
   2  -4  -5 1676.75 14.4981   1
  -2   4  -5 1757.28 10.0162  -2
   2  -4  -5 1757.28 10.0162   1
  -2   4   4 1697.55 10.2674   1
   2   4   4 2260.84 10.9008  -2
  -2  -4   4 2260.84 10.9008   1
   2  -4  -3 1856.17 10.7401   1
   2  -4   3 1786.88 10.8284  -2
  -2   4   3 1786.88 10.8284   1
   2  -4  -2 647.210 5.20595   1
   2   4   2 698.920 8.42114  -2
  -2  -4   2 698.920 8.42114   1
  -2   4   1 46.8847 1.62642   1
  -2  -4  -1 66.4851 3.35128  -2
   2   4  -1 66.4851 3.35128   1
  -2   4   0 3468.29 13.5551   1
  -2   4   0 4503.68 27.6824  -2
   2  -4   0 4503.68 27.6824   1
   2  -4   1 65.4320 2.17204   1
  -2   4   1 72.5766 7.99900  -2
   2  -4   1 72.5766 7.99900   1
   2   4   2 260.204 4.31976   1
  -2  -4   2 487.171 12.4677  -2
   2   4   2 487.171 12.4677   1
   2   4   3 1026.81 6.84564   1
  -2  -4   3 1513.26 16.7126  -2
   2   4   3 1513.26 16.7126   1
   2   4   4 2033.26 10.1421   1
   2   4  -4 2669.80 15.6755  -2
  -2  -4  -4 2669.80 15.6755   1
  -2   4   5 796.348 7.87927  -2
   2  -4   5 796.348 7.87927   1
  -2   4   6 223.020 5.21384  -2
   2  -4   6 223.020 5.21384   1
   2  -4   7 567.172 18.8152   1
   2   4  -7 1440.92 13.4559  -2
  -2  -4  -7 1440.92 13.4559   1
  -2  -4   8 167.622 5.39152  -2
   2   4   8 167.622 5.39152   1
   2   4  -9 684.050 11.6960  -2
  -2  -4  -9 684.050 11.6960   1
  -2   4  10 348.017 9.04802  -2
   2  -4  10 348.017 9.04802   1
   2   4 -11 53.2791 6.91169  -2
  -2  -4 -11 53.2791 6.91169   1
  -2   4  12 690.618 13.0494  -2
   2  -4  12 690.618 13.0494   1
  -2   4  13 5.34953 7.37364  -2
   2  -4  13 5.34953 7.37364   1
  -2   4  14 236.114 11.9516  -2
   2  -4  14 236.114 11.9516   1
  -2   4  15 156.872 11.2052  -2
   2  -4  15 156.872 11.2052   1
   2  -4 -16 446.579 17.7009  -2
  -2   4 -16 446.579 17.7009   1
  -2   4  17 62.1814 17.4397  -2
   2  -4  17 62.1814 17.4397   1
  -2   4  18-7.87295 15.9173  -2
   2  -4  18-7.87295 15.9173   1
   2  -5  18 145.104 20.6547  -2
  -2   5  18 145.104 20.6547   1
  -2   5 -17 1.34786 16.0208  -2
   2  -5 -17 1.34786 16.0208   1
   2  -5  16 162.079 28.0361  -2
  -2   5  16 162.079 28.0361   1
  -2   5  15 97.3227 19.3020   1
   2   5  15 100.207 24.7247  -2
  -2  -5  15 100.207 24.7247   1
  -2   5  14 12.8210 11.5216   1
   2  -5  14 13.6487 12.9256  -2
  -2   5  14 13.6487 12.9256   1
   2  -5  13 610.571 14.7926  -2
  -2   5  13 610.571 14.7926   1
   2  -5  12 20.9758 5.63369  -2
  -2   5  12 20.9758 5.63369   1
   2  -5  11 269.601 8.24098  -2
  -2   5  11 269.601 8.24098   1
   2  -5  10 1240.36 16.8982  -2
  -2   5  10 1240.36 16.8982   1
  -2  -5  -9 737.314 12.4164  -2
   2   5  -9 737.314 12.4164   1
  -2  -5  -8 313.432 5.50095  -2
   2   5  -8 313.432 5.50095   1
   2   5  -7 19.6185 3.72094   1
   2  -5   7 28.3538 2.85867  -2
  -2   5   7 28.3538 2.85867   1
   2   5  -6 2360.72 21.7532   1
   2   5   6 2661.15 12.8280  -2
  -2  -5   6 2661.15 12.8280   1
   2  -5  -5 121.944 3.52914   1
  -2  -5  -5 130.772 3.96306  -2
   2   5  -5 130.772 3.96306   1
  -2   5   4 419.782 6.61239   1
  -2  -5  -4 663.905 5.71800  -2
   2   5  -4 663.905 5.71800   1
   2  -5  -3 324.624 4.31208   1
  -2  -5  -3 1150.16 7.28326  -2
   2   5  -3 1150.16 7.28326   1
  -2  -5   2 1569.77 8.88650   1
  -2   5  -2 1662.85 12.9583  -2
   2  -5  -2 1662.85 12.9583   1
   2  -5  -1 497.169 4.77965   1
  -2   5  -1 1294.27 11.2684  -2
   2  -5  -1 1294.27 11.2684   1
   2   5   0 257.241 3.57060   1
  -2  -5   0 333.439 5.64642  -2
   2   5   0 333.439 5.64642   1
   2  -5   1 2462.65 11.7208   1
  -2  -5   1 2485.29 31.7608  -2
   2   5   1 2485.29 31.7608   1
   2  -5   2 571.704 6.60317   1
  -2  -5   2 1038.89 12.5930  -2
   2   5   2 1038.89 12.5930   1
  -2   5  -3 2434.55 13.8786   1
  -2  -5   3 2522.46 14.0208  -2
   2   5   3 2522.46 14.0208   1
   2  -5   4 733.964 9.87680   1
  -2  -5   4 843.311 7.02000  -2
   2   5   4 843.311 7.02000   1
  -2  -5  -5 22.8157 3.16971   1
   2  -5  -5 59.3613 2.80803  -2
  -2   5  -5 59.3613 2.80803   1
  -2  -5  -6 2361.54 61.5207   1
  -2   5   6 3024.49 15.1112  -2
   2  -5   6 3024.49 15.1112   1
  -2  -5  -7 33.1792 13.6684   1
  -2  -5   7 28.5799 3.34764  -2
   2   5   7 28.5799 3.34764   1
  -2  -5  -8 316.538 29.7214   1
  -2   5   8 396.971 6.99051  -2
   2  -5   8 396.971 6.99051   1
  -2  -5  -9 558.307 10.9915   1
  -2  -5   9 718.280 10.3557  -2
   2   5   9 718.280 10.3557   1
  -2   5  10 1535.42 16.7356  -2
   2  -5  10 1535.42 16.7356   1
  -2   5  11 256.987 7.98373  -2
   2  -5  11 256.987 7.98373   1
  -2   5  12 8.55076 5.37876  -2
   2  -5  12 8.55076 5.37876   1
   2   5 -13 599.458 18.4002  -2
  -2  -5 -13 599.458 18.4002   1
   2   5 -14 8.51411 9.72963  -2
  -2  -5 -14 8.51411 9.72963   1
  -2   5  15 156.916 13.9130  -2
   2  -5  15 156.916 13.9130   1
   2   5 -16 175.717 14.5928  -2
  -2  -5 -16 175.717 14.5928   1
   2  -5 -17 28.4629 15.5388  -2
  -2   5 -17 28.4629 15.5388   1
  -2   5  18 144.213 20.7656  -2
   2  -5  18 144.213 20.7656   1
  -2  -6  18-9.80459 21.5961   1
   2  -6  18-46.1507 39.2855  -2
  -2   6  18-46.1507 39.2855   1
   2   6  17 107.537 19.1059  -2
  -2  -6  17 107.537 19.1059   1
  -2   6 -16 180.717 19.6972  -2
   2  -6 -16 180.717 19.6972   1
   2  -6  15 295.923 30.5158  -2
  -2   6  15 295.923 30.5158   1
   2  -6  14 64.5936 14.4801  -2
  -2   6  14 64.5936 14.4801   1
   2   6  13 6.10912 9.31244  -2
  -2  -6  13 6.10912 9.31244   1
   2  -6  12 471.321 16.4796  -2
  -2   6  12 471.321 16.4796   1
  -2   6 -11 50.8889 6.39388  -2
   2  -6 -11 50.8889 6.39388   1
   2  -6  10 255.826 8.54560  -2
  -2   6  10 255.826 8.54560   1
   2  -6   9 778.800 17.0348  -2
  -2   6   9 778.800 17.0348   1
   2  -6  -8 190.489 11.4853   1
   2  -6   8 167.425 9.38108  -2
  -2   6   8 167.425 9.38108   1
   2   6  -7 1247.78 18.0244   1
   2  -6   7 1558.74 13.9122  -2
  -2   6   7 1558.74 13.9122   1
   2   6  -6 20.4578 6.28813   1
   2   6   6 24.4927 3.88645  -2
  -2  -6   6 24.4927 3.88645   1
   2  -6  -5 1055.53 12.6450   1
   2  -6   5 1436.84 9.12597  -2
  -2   6   5 1436.84 9.12597   1
   2  -6  -4 416.097 6.41450   1
  -2  -6  -4 741.929 5.65229  -2
   2   6  -4 741.929 5.65229   1
  -2  -6   3 1985.09 13.1668   1
  -2  -6  -3 2305.06 10.7425  -2
   2   6  -3 2305.06 10.7425   1
  -2   6   2 71.6891 4.03739   1
  -2  -6  -2 96.5064 6.51788  -2
   2   6  -2 96.5064 6.51788   1
  -2   6   1 3.31328 2.39366   1
  -2  -6  -1 14.8103 2.65349  -2
   2   6  -1 14.8103 2.65349   1
   2  -6   0 2576.36 12.5733   1
  -2   6   0 3498.22 11.5740  -2
   2  -6   0 3498.22 11.5740   1
   2   6   1 31.0324 2.31364   1
  -2  -6   1 39.7970 5.39407  -2
   2   6   1 39.7970 5.39407   1
   2  -6   2 53.0866 2.59387   1
  -2   6   2 87.7459 4.84426  -2
   2  -6   2 87.7459 4.84426   1
  -2   6  -3 1480.67 12.6774   1
  -2  -6   3 2225.80 14.9169  -2
   2   6   3 2225.80 14.9169   1
  -2  -6  -4 722.062 11.4770   1
   2  -6  -4 831.308 8.09603  -2
  -2   6  -4 831.308 8.09603   1
   2  -6   5 807.546 11.8758   1
  -2  -6   5 1153.47 10.3438  -2
   2   6   5 1153.47 10.3438   1
  -2  -6  -6 2.24431 3.23567   1
  -2   6   6 6.22469 3.50410  -2
   2  -6   6 6.22469 3.50410   1
  -2  -6  -7 1281.68 50.5872   1
  -2  -6   7 1586.98 13.6422  -2
   2   6   7 1586.98 13.6422   1
   2   6  -8 55.7864 4.29130  -2
  -2  -6  -8 55.7864 4.29130   1
   2   6  -9 599.720 10.0838  -2
  -2  -6  -9 599.720 10.0838   1
  -2  -6 -10 175.110 6.28430   1
  -2  -6  10 282.255 7.97835  -2
   2   6  10 282.255 7.97835   1
  -2   6  11 152.407 7.17908  -2
   2  -6  11 152.407 7.17908   1
   2   6 -12 368.544 12.2725  -2
  -2  -6 -12 368.544 12.2725   1
  -2  -6  13 22.5047 7.61694  -2
   2   6  13 22.5047 7.61694   1
  -2  -6  14 37.3924 10.8434  -2
   2   6  14 37.3924 10.8434   1
   2   6 -15 204.395 14.4440  -2
  -2  -6 -15 204.395 14.4440   1
   2  -6 -16 264.874 16.6896  -2
  -2   6 -16 264.874 16.6896   1
   2  -6 -17 64.5723 16.8788  -2
  -2   6 -17 64.5723 16.8788   1
  -2  -7 -17 8.44750 16.1896  -2
   2   7 -17 8.44750 16.1896   1
   2   7  16 66.9926 17.0156  -2
  -2  -7  16 66.9926 17.0156   1
   2   7  15 98.3684 16.4845  -2
  -2  -7  15 98.3684 16.4845   1
   2  -7  14 11.1382 20.2370  -2
  -2   7  14 11.1382 20.2370   1
  -2  -7 -13 706.904 19.5001  -2
   2   7 -13 706.904 19.5001   1
   2  -7  12-0.75727 9.29428  -2
  -2   7  12-0.75727 9.29428   1
   2  -7  11 339.595 15.0399  -2
  -2   7  11 339.595 15.0399   1
  -2  -7 -10 456.080 14.7454  -2
   2   7 -10 456.080 14.7454   1
  -2  -7  -9 1495.70 22.8881  -2
   2   7  -9 1495.70 22.8881   1
  -2   7  -8 130.581 9.06112  -2
   2  -7  -8 130.581 9.06112   1
  -2   7   7 61.1208 7.39585   1
   2  -7   7 47.9281 4.57493  -2
  -2   7   7 47.9281 4.57493   1
   2   7  -6 1020.26 22.1039   1
   2   7   6 1063.55 9.96740  -2
  -2  -7   6 1063.55 9.96740   1
   2  -7  -5 3.56130 4.93298   1
   2   7   5 18.0474 2.84957  -2
  -2  -7   5 18.0474 2.84957   1
   2  -7  -4 57.7265 2.82790   1
   2   7   4 89.6526 3.13043  -2
  -2  -7   4 89.6526 3.13043   1
  -2   7   3 1577.44 13.0829   1
  -2   7  -3 1912.38 12.3975  -2
   2  -7  -3 1912.38 12.3975   1
   2  -7  -2 349.338 10.1648   1
   2   7   2 442.729 6.95602  -2
  -2  -7   2 442.729 6.95602   1
   2  -7  -1 1363.58 11.0563   1
  -2   7  -1 1831.65 15.8785  -2
   2  -7  -1 1831.65 15.8785   1
   2  -7   0 23.4552 2.11749   1
  -2   7   0 29.0604 2.47388  -2
   2  -7   0 29.0604 2.47388   1
   2  -7   1 1064.99 10.4432   1
  -2   7   1 1587.58 8.19875  -2
   2  -7   1 1587.58 8.19875   1
   2  -7   2 268.239 5.69765   1
  -2  -7   2 420.600 6.75949  -2
   2   7   2 420.600 6.75949   1
  -2  -7  -3 1320.10 14.3795   1
  -2   7   3 1814.18 13.0816  -2
   2  -7   3 1814.18 13.0816   1
  -2  -7  -4 35.7806 3.90179   1
  -2  -7   4 53.4029 3.49372  -2
   2   7   4 53.4029 3.49372   1
  -2   7  -5 54.8656 4.31486   1
  -2   7   5 50.4437 3.73229  -2
   2  -7   5 50.4437 3.73229   1
  -2  -7  -6 645.593 15.3359   1
  -2   7   6 828.940 8.88857  -2
   2  -7   6 828.940 8.88857   1
  -2   7   7 15.4188 3.38664  -2
   2  -7   7 15.4188 3.38664   1
  -2  -7   8 57.8702 3.42666  -2
   2   7   8 57.8702 3.42666   1
  -2  -7   9 575.651 11.7931  -2
   2   7   9 575.651 11.7931   1
  -2  -7 -10 472.861 12.9400   1
   2  -7 -10 520.531 15.5391  -2
  -2   7 -10 520.531 15.5391   1
  -2  -7 -11 130.653 4.55187   1
  -2  -7  11 231.009 12.7042  -2
   2   7  11 231.009 12.7042   1
   2  -7 -12 10.1388 10.1836  -2
  -2   7 -12 10.1388 10.1836   1
   2  -7 -13 592.516 21.0566  -2
  -2   7 -13 592.516 21.0566   1
  -2   7  14 28.0637 10.7157  -2
   2  -7  14 28.0637 10.7157   1
  -2   7  15 146.969 13.8773  -2
   2  -7  15 146.969 13.8773   1
  -2   7  16 24.6589 11.8001  -2
   2  -7  16 24.6589 11.8001   1
  -2   7  17 15.7475 16.2847  -2
   2  -7  17 15.7475 16.2847   1
   2  -8  17 111.484 18.4342  -2
  -2   8  17 111.484 18.4342   1
   2  -8  16 74.1258 15.2304  -2
  -2   8  16 74.1258 15.2304   1
  -2  -8 -15 276.001 20.4712  -2
   2   8 -15 276.001 20.4712   1
  -2  -8 -14 22.1824 15.3447  -2
   2   8 -14 22.1824 15.3447   1
   2   8 -13 4.58687 12.5902   1
   2  -8  13 27.7966 12.9889  -2
  -2   8  13 27.7966 12.9889   1
  -2  -8  12 75.6888 23.8589   1
  -2  -8 -12 128.778 12.2007  -2
   2   8 -12 128.778 12.2007   1
  -2  -8 -11 54.9654 9.44768  -2
   2   8 -11 54.9654 9.44768   1
   2  -8  10 38.2599 8.04573  -2
  -2   8  10 38.2599 8.04573   1
   2  -8  -9 748.581 23.2993   1
  -2  -8  -9 1001.34 17.2038  -2
   2   8  -9 1001.34 17.2038   1
   2  -8   8-2.96687 4.93217  -2
  -2   8   8-2.96687 4.93217   1
   2   8  -7 1274.03 30.5349   1
   2  -8   7 2004.65 13.8831  -2
  -2   8   7 2004.65 13.8831   1
   2   8  -6 10.8292 8.53773   1
   2   8   6 35.6923 4.72871  -2
  -2  -8   6 35.6923 4.72871   1
   2   8   5 741.070 7.08765  -2
  -2  -8   5 741.070 7.08765   1
  -2  -8   4 90.2008 4.16621   1
   2   8   4 229.787 5.67375  -2
  -2  -8   4 229.787 5.67375   1
  -2  -8   3 1784.96 16.7847   1
  -2  -8  -3 1909.58 21.4369  -2
   2   8  -3 1909.58 21.4369   1
   2  -8  -2 10.3217 3.56798   1
   2   8   2 47.7012 6.84813  -2
  -2  -8   2 47.7012 6.84813   1
   2   8  -1 87.1630 5.28291   1
  -2   8  -1 111.412 3.61348  -2
   2  -8  -1 111.412 3.61348   1
   2  -8   0 563.872 10.1584   1
  -2  -8   0 679.495 7.16047  -2
   2   8   0 679.495 7.16047   1
  -2  -8  -1 86.5435 3.48698   1
  -2  -8   1 101.487 2.76795  -2
   2   8   1 101.487 2.76795   1
   2  -8   2 120.464 6.66886   1
  -2   8   2 120.538 7.30376  -2
   2  -8   2 120.538 7.30376   1
  -2   8  -3 722.572 34.2819   1
   2   8  -3 1248.65 13.1999  -2
  -2  -8  -3 1248.65 13.1999   1
  -2  -8  -4 438.824 11.4801   1
  -2   8   4 448.416 9.02757  -2
   2  -8   4 448.416 9.02757   1
  -2  -8  -5 731.401 13.2711   1
  -2  -8   5 827.546 9.87864  -2
   2   8   5 827.546 9.87864   1
   2  -8   6 59.5519 5.48464   1
   2  -8  -6 57.1650 4.03070  -2
  -2   8  -6 57.1650 4.03070   1
  -2  -8  -7 1741.18 27.8018   1
  -2  -8   7 2261.17 21.0593  -2
   2   8   7 2261.17 21.0593   1
  -2  -8   8 6.94195 6.01141  -2
   2   8   8 6.94195 6.01141   1
  -2   8   9 1104.98 15.5103  -2
   2  -8   9 1104.98 15.5103   1
   2   8 -10 10.2901 8.46307  -2
  -2  -8 -10 10.2901 8.46307   1
   2   8 -11 100.735 11.0261  -2
  -2  -8 -11 100.735 11.0261   1
   2   8 -12 83.9086 11.5889  -2
  -2  -8 -12 83.9086 11.5889   1
  -2  -8  13 20.2701 11.6035  -2
   2   8  13 20.2701 11.6035   1
   2  -8 -14-3.17456 11.6911  -2
  -2   8 -14-3.17456 11.6911   1
  -2   8  15 193.398 14.2457  -2
   2  -8  15 193.398 14.2457   1
  -2  -8  16 65.6943 12.3378  -2
   2   8  16 65.6943 12.3378   1
   2   8 -17 79.3751 21.4705  -2
  -2  -8 -17 79.3751 21.4705   1
  -2  -9 -17 43.8622 18.5590  -2
   2   9 -17 43.8622 18.5590   1
  -2   9 -16 14.9139 13.2017  -2
   2  -9 -16 14.9139 13.2017   1
  -2   9 -15 105.502 14.4585  -2
   2  -9 -15 105.502 14.4585   1
   2  -9  14 28.5826 11.9847  -2
  -2   9  14 28.5826 11.9847   1
   2  -9  13 547.751 18.0423  -2
  -2   9  13 547.751 18.0423   1
   2  -9  12 10.9993 7.70909  -2
  -2   9  12 10.9993 7.70909   1
  -2  -9 -11 188.240 10.0572  -2
   2   9 -11 188.240 10.0572   1
   2  -9  10 138.411 9.04099  -2
  -2   9  10 138.411 9.04099   1
   2  -9   9 782.675 13.4546  -2
  -2   9   9 782.675 13.4546   1
   2   9   8-2.46888 6.64456  -2
  -2  -9   8-2.46888 6.64456   1
   2  -9  -7 0.83145 5.93048   1
  -2  -9  -7 15.8147 4.24085  -2
   2   9  -7 15.8147 4.24085   1
  -2  -9   6 155.513 9.40654   1
  -2   9  -6 208.529 6.84665  -2
   2  -9  -6 208.529 6.84665   1
  -2  -9   5 23.7408 5.88374   1
  -2  -9  -5 78.0640 4.63863  -2
   2   9  -5 78.0640 4.63863   1
   2  -9  -4 30.8364 3.41172   1
  -2   9  -4 52.6922 6.77695  -2
   2  -9  -4 52.6922 6.77695   1
  -2  -9   3 581.576 11.1605   1
  -2  -9  -3 829.469 13.0751  -2
   2   9  -3 829.469 13.0751   1
  -2  -9   2 2.57408 1.80523   1
   2   9   2 20.7922 6.88678  -2
  -2  -9   2 20.7922 6.88678   1
  -2  -9   1 1280.33 15.8297   1
  -2  -9  -1 1608.23 21.2330  -2
   2   9  -1 1608.23 21.2330   1
  -2  -9   0 51.1082 10.4777   1
  -2  -9   0 53.3109 5.17478  -2
   2   9   0 53.3109 5.17478   1
   2   9   1 1004.35 9.38325   1
  -2   9   1 1539.92 17.6135  -2
   2  -9   1 1539.92 17.6135   1
   2   9   2 2.50475 1.39772   1
  -2  -9   2 7.15088 3.58325  -2
   2   9   2 7.15088 3.58325   1
  -2   9  -3 844.771 19.2614   1
  -2  -9   3 985.361 12.4330  -2
   2   9   3 985.361 12.4330   1
  -2   9  -4 16.6061 13.0689   1
  -2  -9   4 28.2465 4.77839  -2
   2   9   4 28.2465 4.77839   1
  -2   9  -5 5.21848 4.09766   1
  -2  -9   5 42.4551 8.47928  -2
   2   9   5 42.4551 8.47928   1
  -2  -9  -6 198.721 9.54642   1
  -2  -9   6 224.309 7.55850  -2
   2   9   6 224.309 7.55850   1
  -2  -9  -7 37.7766 6.81874   1
  -2  -9   7 41.7814 6.09292  -2
   2   9   7 41.7814 6.09292   1
  -2  -9   8 9.53633 6.64674  -2
   2   9   8 9.53633 6.64674   1
   2   9  -9 515.938 13.5751  -2
  -2  -9  -9 515.938 13.5751   1
   2  -9 -10 95.5569 10.5167  -2
  -2   9 -10 95.5569 10.5167   1
  -2  -9  11 144.804 11.9607  -2
   2   9  11 144.804 11.9607   1
  -2  -9  12 0.83830 9.79896  -2
   2   9  12 0.83830 9.79896   1
   2  -9 -13 494.557 18.1130  -2
  -2   9 -13 494.557 18.1130   1
   2  -9 -14 2.13087 10.9685  -2
  -2   9 -14 2.13087 10.9685   1
   2  -9 -15 151.498 15.1251  -2
  -2   9 -15 151.498 15.1251   1
  -2  -9  16 6.83115 13.6605  -2
   2   9  16 6.83115 13.6605   1
   2  -9 -17 107.277 32.7904  -2
  -2   9 -17 107.277 32.7904   1
  -2 -10 -16 10.1824 22.5211  -2
   2  10 -16 10.1824 22.5211   1
  -2 -10 -15 207.190 23.4487  -2
   2  10 -15 207.190 23.4487   1
   2  10  14-3.26679 13.6875  -2
  -2 -10  14-3.26679 13.6875   1
  -2  10 -13 3.82850 10.3196  -2
   2 -10 -13 3.82850 10.3196   1
  -2  10 -12-3.40300 7.90703  -2
   2 -10 -12-3.40300 7.90703   1
  -2  10 -11 25.5071 7.76334  -2
   2 -10 -11 25.5071 7.76334   1
  -2 -10 -10-0.24674 6.75565  -2
   2  10 -10-0.24674 6.75565   1
   2 -10   9 486.021 11.7259  -2
  -2  10   9 486.021 11.7259   1
   2  10  -8 16.9451 6.58817   1
  -2 -10  -8 34.9536 8.68209  -2
   2  10  -8 34.9536 8.68209   1
  -2 -10   7 958.004 20.6503   1
  -2  10  -7 1362.20 16.7789  -2
   2 -10  -7 1362.20 16.7789   1
   2  10  -6 3.86112 3.56556   1
  -2 -10  -6 6.62613 6.56247  -2
   2  10  -6 6.62613 6.56247   1
   2  10  -5 372.506 11.7500   1
   2 -10   5 1017.78 14.8377  -2
  -2  10   5 1017.78 14.8377   1
  -2 -10   4 32.9709 2.95066   1
  -2  10  -4 58.8641 5.56754  -2
   2 -10  -4 58.8641 5.56754   1
   2 -10  -3 944.804 7.80280   1
   2  10   3 1494.99 18.0733  -2
  -2 -10   3 1494.99 18.0733   1
  -2 -10   2 34.2237 6.41870   1
   2 -10   2 69.1595 7.40229  -2
  -2  10   2 69.1595 7.40229   1
   2 -10  -1 4.20555 4.84718   1
  -2 -10  -1 13.1133 7.59951  -2
   2  10  -1 13.1133 7.59951   1
  -2 -10   0 15.7954 6.20985   1
   2  10   0 35.5343 6.27113  -2
  -2 -10   0 35.5343 6.27113   1
  -2 -10  -1 41.2557 6.22349   1
  -2  10   1 51.5213 6.40741  -2
   2 -10   1 51.5213 6.40741   1
   2  10   2 35.8948 7.23224   1
   2  10  -2 50.4400 5.42524  -2
  -2 -10  -2 50.4400 5.42524   1
   2 -10   3 722.706 5.98940   1
  -2 -10   3 1250.07 16.8498  -2
   2  10   3 1250.07 16.8498   1
   2 -10   4 6.48970 5.51648   1
  -2  10   4 24.4693 6.94043  -2
   2 -10   4 24.4693 6.94043   1
  -2 -10  -5 674.985 19.8136   1
  -2  10   5 839.668 16.4244  -2
   2 -10   5 839.668 16.4244   1
  -2 -10  -6 3.02176 5.76706   1
  -2  10   6 10.7706 7.33396  -2
   2 -10   6 10.7706 7.33396   1
  -2  10   7 1230.90 16.5941  -2
   2 -10   7 1230.90 16.5941   1
  -2 -10   8 23.2938 6.84838  -2
   2  10   8 23.2938 6.84838   1
   2 -10  -9 584.088 14.3412  -2
  -2  10  -9 584.088 14.3412   1
  -2  10  10 14.5858 9.02030  -2
   2 -10  10 14.5858 9.02030   1
   2  10 -11 61.0826 10.4202  -2
  -2 -10 -11 61.0826 10.4202   1
  -2  10  12 5.08027 9.84196  -2
   2 -10  12 5.08027 9.84196   1
  -2  10  13-13.6126 10.1573  -2
   2 -10  13-13.6126 10.1573   1
  -2 -10  14 9.53556 12.4544  -2
   2  10  14 9.53556 12.4544   1
   2 -10 -15 143.852 19.9536  -2
  -2  10 -15 143.852 19.9536   1
   2 -10 -16-0.48192 18.0876  -2
  -2  10 -16-0.48192 18.0876   1
   2 -11  14-5.56593 30.0884  -2
  -2  11  14-5.56593 30.0884   1
  -2 -11 -13 527.707 20.4489  -2
   2  11 -13 527.707 20.4489   1
  -2 -11 -12 13.1495 10.5378  -2
   2  11 -12 13.1495 10.5378   1
   2 -11  11 160.196 12.0815  -2
  -2  11  11 160.196 12.0815   1
  -2 -11 -10 8.89885 9.15767  -2
   2  11 -10 8.89885 9.15767   1
   2 -11   9 471.310 13.9232  -2
  -2  11   9 471.310 13.9232   1
   2  11  -8 18.4211 13.0011   1
  -2 -11  -8 38.5887 8.99782  -2
   2  11  -8 38.5887 8.99782   1
   2  11  -7 5.39719 10.6116   1
   2  11   7 17.4433 9.81117  -2
  -2 -11   7 17.4433 9.81117   1
   2  11  -6-0.80995 8.36267   1
  -2  11  -6 14.8020 7.86608  -2
   2 -11  -6 14.8020 7.86608   1
  -2 -11   5 1.73815 4.05934   1
  -2 -11  -5 25.5741 7.14839  -2
   2  11  -5 25.5741 7.14839   1
  -2 -11   4 32.3825 6.26065   1
  -2 -11  -4 56.1643 8.18128  -2
   2  11  -4 56.1643 8.18128   1
  -2 -11   3 471.079 11.3049   1
   2 -11   3 722.776 14.1386  -2
  -2  11   3 722.776 14.1386   1
   2 -11  -2 4.50120 5.80521   1
  -2 -11  -2 12.5838 7.13038  -2
   2  11  -2 12.5838 7.13038   1
  -2 -11   1 412.499 14.7492   1
   2  11   1 604.398 16.8643  -2
  -2 -11   1 604.398 16.8643   1
   2 -11   0 0.85074 6.34787   1
  -2 -11   0-2.29719 7.23701  -2
   2  11   0-2.29719 7.23701   1
   2 -11   1 608.874 15.2070   1
  -2 -11   1 806.962 15.2560  -2
   2  11   1 806.962 15.2560   1
   2  11   2 2.95701 4.55066   1
   2  11  -2 20.6255 7.04891  -2
  -2 -11  -2 20.6255 7.04891   1
   2 -11   3 666.317 18.7517   1
  -2 -11   3 868.192 15.1130  -2
   2  11   3 868.192 15.1130   1
  -2  11   4 45.6081 7.44810  -2
   2 -11   4 45.6081 7.44810   1
  -2 -11   5 24.8908 7.49519  -2
   2  11   5 24.8908 7.49519   1
  -2  11   6 25.6558 8.97348  -2
   2 -11   6 25.6558 8.97348   1
   2  11  -7 55.2955 12.1707  -2
  -2 -11  -7 55.2955 12.1707   1
  -2  11  -8 5.65171 10.2561   1
  -2 -11   8 24.2587 11.9206  -2
   2  11   8 24.2587 11.9206   1
  -2  11   9 396.235 17.1217  -2
   2 -11   9 396.235 17.1217   1
   2  11 -10 5.49812 11.2279  -2
  -2 -11 -10 5.49812 11.2279   1
  -2  11  11 136.186 15.1316  -2
   2 -11  11 136.186 15.1316   1
   2  11 -12-4.22707 11.8107  -2
  -2 -11 -12-4.22707 11.8107   1
   2 -11 -13 483.783 20.7072  -2
  -2  11 -13 483.783 20.7072   1
  -2 -11  14 63.7749 24.9408  -2
   2  11  14 63.7749 24.9408   1
  -2 -11  15 119.852 33.0592  -2
   2  11  15 119.852 33.0592   1
  -2  12  14 8.55738 24.3064   1
   2 -12  13-12.1931 28.6927  -2
  -2  12  13-12.1931 28.6927   1
   2  12 -12 1.83223 18.0014   1
   2  12  12 5.13252 19.8636  -2
  -2 -12  12 5.13252 19.8636   1
  -2 -12 -11 14.0553 13.6606  -2
   2  12 -11 14.0553 13.6606   1
  -2  12 -10 54.4641 13.7154  -2
   2 -12 -10 54.4641 13.7154   1
  -2 -12  -9 185.775 16.3836  -2
   2  12  -9 185.775 16.3836   1
   2 -12   8 33.3879 11.7529  -2
  -2  12   8 33.3879 11.7529   1
  -2  12  -7 571.976 19.9683  -2
   2 -12  -7 571.976 19.9683   1
   2  12  -6 9.88590 10.8524   1
  -2  12  -6 28.9023 10.3663  -2
   2 -12  -6 28.9023 10.3663   1
  -2 -12  -5 292.594 11.6438  -2
   2  12  -5 292.594 11.6438   1
  -2 -12   4 0.35935 5.46811   1
  -2  12  -4 2.37046 8.19174  -2
   2 -12  -4 2.37046 8.19174   1
  -2 -12   3 495.217 15.3190   1
   2  12   3 585.509 15.5375  -2
  -2 -12   3 585.509 15.5375   1
   2 -12  -2 67.7007 6.34665   1
   2 -12   2 84.2146 10.3041  -2
  -2  12   2 84.2146 10.3041   1
   2 -12  -1-2.05919 6.32537   1
  -2 -12  -1 20.9764 9.58411  -2
   2  12  -1 20.9764 9.58411   1
   2 -12   0 20.1688 7.35514   1
  -2 -12   0 38.2682 7.62057  -2
   2  12   0 38.2682 7.62057   1
   2 -12   1 29.0094 7.52939   1
  -2  12   1 61.6062 8.34276  -2
   2 -12   1 61.6062 8.34276   1
   2  12   2 27.7112 7.04623   1
   2  12  -2 56.4823 8.29846  -2
  -2 -12  -2 56.4823 8.29846   1
   2 -12   3 383.163 25.3798   1
  -2  12   3 503.353 13.0267  -2
   2 -12   3 503.353 13.0267   1
  -2 -12   4 9.91144 7.54673  -2
   2  12   4 9.91144 7.54673   1
   2 -12   5 130.151 19.7130   1
  -2 -12   5 191.811 13.1454  -2
   2  12   5 191.811 13.1454   1
  -2 -12   6 21.5225 9.53468  -2
   2  12   6 21.5225 9.53468   1
   2  12   7 260.692 35.4773   1
  -2  12   7 606.967 24.8453  -2
   2 -12   7 606.967 24.8453   1
  -2 -12   8 3.43838 12.2394  -2
   2  12   8 3.43838 12.2394   1
  -2  12   9 204.443 20.1060  -2
   2 -12   9 204.443 20.1060   1
  -2  12  10 10.4583 16.5834  -2
   2 -12  10 10.4583 16.5834   1
  -2  12  11 38.2682 15.7250  -2
   2 -12  11 38.2682 15.7250   1
  -2  12  12 46.1219 16.4997  -2
   2 -12  12 46.1219 16.4997   1
  -2 -12  13 80.2548 26.7162  -2
   2  12  13 80.2548 26.7162   1
   2 -13  12-8.96523 25.5025  -2
  -2  13  12-8.96523 25.5025   1
   2  13 -11 33.8840 23.0467   1
   2 -13  11 102.863 22.6606  -2
  -2  13  11 102.863 22.6606   1
   2  13  10 5.23388 15.3690  -2
  -2 -13  10 5.23388 15.3690   1
  -2 -13  -9 326.722 19.1124  -2
   2  13  -9 326.722 19.1124   1
   2 -13   8 25.1469 12.7263  -2
  -2  13   8 25.1469 12.7263   1
  -2 -13  -7 13.2390 10.2381  -2
   2  13  -7 13.2390 10.2381   1
   2 -13   6 123.751 11.7736  -2
  -2  13   6 123.751 11.7736   1
  -2 -13   5 10.1675 16.5817   1
  -2 -13  -5 11.6085 8.93084  -2
   2  13  -5 11.6085 8.93084   1
  -2 -13   4 70.0339 18.5865   1
   2 -13   4 104.004 10.8053  -2
  -2  13   4 104.004 10.8053   1
  -2 -13   3 226.912 12.2623   1
  -2 -13  -3 278.090 13.0189  -2
   2  13  -3 278.090 13.0189   1
  -2 -13   2 32.3283 15.3883   1
  -2 -13  -2 34.0165 8.08955  -2
   2  13  -2 34.0165 8.08955   1
  -2 -13   1 267.155 13.3430   1
  -2 -13  -1 381.648 16.7081  -2
   2  13  -1 381.648 16.7081   1
  -2 -13   0 15.8337 7.77991   1
  -2  13   0 39.4065 9.33894  -2
   2 -13   0 39.4065 9.33894   1
   2 -13   1 310.359 14.1121   1
  -2 -13   1 410.763 13.8016  -2
   2  13   1 410.763 13.8016   1
   2  13   2 4.43065 10.0383   1
  -2  13   2 25.6637 8.53708  -2
   2 -13   2 25.6637 8.53708   1
   2 -13   3 300.262 23.5311   1
  -2 -13   3 339.012 12.3919  -2
   2  13   3 339.012 12.3919   1
   2 -13   4 57.6408 16.1306   1
  -2  13   4 73.7065 9.81282  -2
   2 -13   4 73.7065 9.81282   1
  -2  13   5 28.8199 8.37895  -2
   2 -13   5 28.8199 8.37895   1
  -2  13   6 121.471 12.2117  -2
   2 -13   6 121.471 12.2117   1
   2  13  -7 62.1136 15.6474  -2
  -2 -13  -7 62.1136 15.6474   1
  -2 -13   8 82.6003 15.2617  -2
   2  13   8 82.6003 15.2617   1
  -2 -13   9 261.857 22.5091  -2
   2  13   9 261.857 22.5091   1
  -2 -13  10 20.6797 14.5422  -2
   2  13  10 20.6797 14.5422   1
  -2 -13  11 55.0564 16.5358  -2
   2  13  11 55.0564 16.5358   1
   2  13 -12 70.2510 26.6413  -2
  -2 -13 -12 70.2510 26.6413   1
   2 -14  11 79.7486 27.3685  -2
  -2  14  11 79.7486 27.3685   1
  -2 -14 -10 35.9907 16.1720  -2
   2  14 -10 35.9907 16.1720   1
   2 -14   9 80.5484 14.6656  -2
  -2  14   9 80.5484 14.6656   1
   2  14   8 62.1748 12.4805  -2
  -2 -14   8 62.1748 12.4805   1
  -2 -14  -7 250.430 15.3594  -2
   2  14  -7 250.430 15.3594   1
   2 -14   6 31.5284 10.9563  -2
  -2  14   6 31.5284 10.9563   1
  -2 -14   5 102.955 21.4776   1
  -2 -14  -5 122.522 13.5651  -2
   2  14  -5 122.522 13.5651   1
  -2 -14   4 11.2815 15.9277   1
  -2 -14  -4 31.8578 10.3467  -2
   2  14  -4 31.8578 10.3467   1
  -2 -14   3 213.453 23.8778   1
  -2 -14  -3 276.281 14.1189  -2
   2  14  -3 276.281 14.1189   1
  -2 -14   2 67.4909 17.2745   1
  -2 -14  -2 70.2224 12.5085  -2
   2  14  -2 70.2224 12.5085   1
  -2 -14   1 8.25835 13.1656   1
  -2 -14  -1 37.8216 10.0186  -2
   2  14  -1 37.8216 10.0186   1
  -2  14   0 147.947 12.0646  -2
   2 -14   0 147.947 12.0646   1
   2 -14   1 14.1203 11.2548   1
  -2 -14   1 31.1230 9.43720  -2
   2  14   1 31.1230 9.43720   1
   2  14   2 86.5674 13.5676   1
  -2  14   2 98.3613 10.6050  -2
   2 -14   2 98.3613 10.6050   1
   2 -14   3 162.986 19.9363   1
  -2  14   3 231.160 13.1446  -2
   2 -14   3 231.160 13.1446   1
   2 -14   4 5.60230 13.2641   1
  -2  14   4 17.4640 9.63692  -2
   2 -14   4 17.4640 9.63692   1
   2 -14   5 80.9396 18.6092   1
  -2 -14   5 105.782 11.4886  -2
   2  14   5 105.782 11.4886   1
  -2 -14   6 16.0429 9.20901  -2
   2  14   6 16.0429 9.20901   1
  -2 -14   7 194.821 19.7777  -2
   2  14   7 194.821 19.7777   1
  -2 -14   8 22.6443 17.0897  -2
   2  14   8 22.6443 17.0897   1
  -2 -14   9 77.7129 15.6890  -2
   2  14   9 77.7129 15.6890   1
  -2 -14  10 37.7342 18.8392  -2
   2  14  10 37.7342 18.8392   1
  -2 -15 -10 29.3349 31.4772  -2
   2  15 -10 29.3349 31.4772   1
   2  15   9 37.8334 17.6712  -2
  -2 -15   9 37.8334 17.6712   1
   2 -15   8 44.7547 17.1049  -2
  -2  15   8 44.7547 17.1049   1
  -2 -15  -7 15.0013 13.2111  -2
   2  15  -7 15.0013 13.2111   1
  -2 -15   6 70.8121 22.5145   1
  -2 -15  -6 90.2728 16.7636  -2
   2  15  -6 90.2728 16.7636   1
  -2 -15   5 1.77585 18.5005   1
  -2  15  -5 14.0036 12.1831  -2
   2 -15  -5 14.0036 12.1831   1
  -2 -15   4 88.4263 20.9891   1
   2 -15   4 100.825 14.0911  -2
  -2  15   4 100.825 14.0911   1
  -2 -15   3 67.0784 19.7881   1
  -2 -15  -3 87.2709 13.9983  -2
   2  15  -3 87.2709 13.9983   1
  -2  15  -2 60.6838 11.3549  -2
   2 -15  -2 60.6838 11.3549   1
  -2 -15  -1 95.6164 11.9460  -2
   2  15  -1 95.6164 11.9460   1
   2  15   0 20.1486 10.5151  -2
  -2 -15   0 20.1486 10.5151   1
  -2  15   1 82.5496 12.2127  -2
   2 -15   1 82.5496 12.2127   1
   2  15   2 33.2465 29.4183   1
  -2  15   2 54.3443 11.7047  -2
   2 -15   2 54.3443 11.7047   1
   2 -15   3 39.4795 15.1418   1
  -2 -15   3 107.783 12.2040  -2
   2  15   3 107.783 12.2040   1
   2 -15   4 36.4221 16.3005   1
  -2 -15   4 56.9384 11.3261  -2
   2  15   4 56.9384 11.3261   1
   2 -15   5 16.7848 16.0407   1
   2  15  -5 8.97055 13.0961  -2
  -2 -15  -5 8.97055 13.0961   1
   2 -15   6 55.9301 19.1408   1
   2  15  -6 76.4605 15.1067  -2
  -2 -15  -6 76.4605 15.1067   1
   2 -15   7 15.9184 18.1678   1
   2  15  -7 45.0173 15.0140  -2
  -2 -15  -7 45.0173 15.0140   1
   2  15  -8 37.3295 20.0734  -2
  -2 -15  -8 37.3295 20.0734   1
  -2  15   9 45.1421 21.6461  -2
   2 -15   9 45.1421 21.6461   1
   2  16   7 77.0843 30.0138  -2
  -2 -16   7 77.0843 30.0138   1
  -2 -16   6-5.77243 19.6615   1
   2 -16   6 33.7710 26.1785  -2
  -2  16   6 33.7710 26.1785   1
   2 -16   5 13.7860 15.3999  -2
  -2  16   5 13.7860 15.3999   1
  -2 -16  -4 24.1653 20.1012  -2
   2  16  -4 24.1653 20.1012   1
  -2 -16  -3 74.7311 17.1196  -2
   2  16  -3 74.7311 17.1196   1
   2  16   2 22.4022 11.3323  -2
  -2 -16   2 22.4022 11.3323   1
  -2  16  -1 7.96696 10.8801  -2
   2 -16  -1 7.96696 10.8801   1
  -2 -16   0 165.448 13.9573  -2
   2  16   0 165.448 13.9573   1
  -2  16   1-5.57638 11.2742  -2
   2 -16   1-5.57638 11.2742   1
   2  16   2 27.3300 33.0637   1
  -2  16   2 114.436 13.4862  -2
   2 -16   2 114.436 13.4862   1
  -2  16   3 61.8768 15.1005  -2
   2 -16   3 61.8768 15.1005   1
  -2 -16   4 22.2730 14.3946  -2
   2  16   4 22.2730 14.3946   1
  -2 -16   5 33.5860 15.6154  -2
   2  16   5 33.5860 15.6154   1
   2 -16   6 27.9267 17.7936   1
  -2  16   6 7.88422 16.9057  -2
   2 -16   6 7.88422 16.9057   1
  -2  16   7 72.0407 17.6966  -2
   2 -16   7 72.0407 17.6966   1
   2 -16   8 1.87014 19.3752   1
  -2  17  -3-7.89607 23.2911  -2
   2 -17  -3-7.89607 23.2911   1
  -2  17  -2 16.2114 22.8362  -2
   2 -17  -2 16.2114 22.8362   1
  -2  17  -1 15.7058 21.2486  -2
   2 -17  -1 15.7058 21.2486   1
  -2  17   0 21.1977 21.4111  -2
   2 -17   0 21.1977 21.4111   1
  -2  17   1 37.2538 22.2655  -2
   2 -17   1 37.2538 22.2655   1
  -2  17   2 41.5120 22.3977  -2
   2 -17   2 41.5120 22.3977   1
  -2  17   3 23.5622 22.6691  -2
   2 -17   3 23.5622 22.6691   1
  -2  17   4 16.5598 22.2729  -2
   2 -17   4 16.5598 22.2729   1
   3   0  18 502.174 36.0493  -2
  -3   0  18 502.174 36.0493   1
   3   0  16 567.535 35.9423  -2
  -3   0  16 567.535 35.9423   1
   3   0  14 25.1494 19.2687  -2
  -3   0  14 25.1494 19.2687   1
   3   0  12 67.9189 21.1788  -2
  -3   0  12 67.9189 21.1788   1
   3   0  10 2041.34 52.6118  -2
  -3   0  10 2041.34 52.6118   1
   3   0  -8 476.844 9.93707   1
   3   0  -6 4805.02 42.3767   1
  -3   0   4 1035.14 13.8733   1
   3   0  -2 2756.26 10.8260   1
  -3   0   0 210.864 3.28208   1
   3   0   2 491.128 6.46611   1
   3   0   4 233.633 5.50333   1
   3   0   6 5158.51 27.6085   1
   3   0  -6 6913.37 79.9822  -2
  -3   0  -6 6913.37 79.9822   1
   3   0   8 994.037 38.4941   1
   3   0  -8 974.569 15.7840  -2
  -3   0  -8 974.569 15.7840   1
   3   0  10 2361.10 46.0589   1
   3   0 -10 2020.76 57.6253  -2
  -3   0 -10 2020.76 57.6253   1
   3   0  12 28.4331 28.4206   1
   3   0 -12 57.5379 13.5486  -2
  -3   0 -12 57.5379 13.5486   1
   3   0  14 6.94060 8.97204   1
   3   0 -14-10.9098 21.3650  -2
  -3   0 -14-10.9098 21.3650   1
   3   0  16 360.717 21.5083   1
   3   0  18 251.071 29.6144   1
  -3   0  18 354.141 32.6338  -2
   3   0  18 354.141 32.6338   1
   3  -1  19-3.60611 24.2414  -2
  -3   1  19-3.60611 24.2414   1
   3   1  18 2.36648 22.1627  -2
  -3  -1  18 2.36648 22.1627   1
   3   1  17-6.78161 16.4167  -2
  -3  -1  17-6.78161 16.4167   1
  -3   1  16 436.243 55.9824   1
   3  -1  16 555.360 26.5492  -2
  -3   1  16 555.360 26.5492   1
  -3   1  15 67.5783 35.7568   1
   3   1  15 92.8361 19.1315  -2
  -3  -1  15 92.8361 19.1315   1
  -3   1  14 176.316 38.3250   1
   3  -1  14 282.037 21.6471  -2
  -3   1  14 282.037 21.6471   1
  -3   1  13 11.9377 5.90343   1
   3  -1  13 12.2887 18.6321  -2
  -3   1  13 12.2887 18.6321   1
  -3   1  12 1859.97 28.0772   1
   3  -1  12 2194.49 58.5074  -2
  -3   1  12 2194.49 58.5074   1
  -3   1  11-3.57514 5.64824   1
   3  -1  11 52.3255 18.7405  -2
  -3   1  11 52.3255 18.7405   1
  -3  -1  10 1290.58 16.8576   1
   3  -1  -9 16.9281 4.14927   1
   3   1   9 35.7567 15.5313  -2
  -3  -1   9 35.7567 15.5313   1
   3   1  -8 832.024 8.38353   1
  -3   1   7 80.4322 4.06751   1
   3   1  -6 307.244 6.47578   1
  -3   1   5 187.894 5.42392   1
   3   1  -4 2197.80 14.9071   1
   3  -1  -3 197.200 3.18979   1
  -3  -1   2 929.600 5.82245   1
  -3  -1   1 1.86367 0.93050   1
  -3   1   0 10940.0 18.6295   1
   3  -1   1 5.83287 1.16693   1
  -3  -1  -2 1676.91 9.66515   1
  -3  -1  -3 13.8760 1.39538   1
   3   1   4 4670.39 20.7054   1
   3  -1   5 29.8677 2.05382   1
   3   1   6 16.6623 1.78605   1
   3   1  -6 129.889 14.7503  -2
  -3  -1  -6 129.889 14.7503   1
   3   1   7 68.4307 1.92385   1
   3   1  -7 98.5161 15.3516  -2
  -3  -1  -7 98.5161 15.3516   1
   3   1   8 133.206 4.12632   1
   3   1  -8 401.393 24.5004  -2
  -3  -1  -8 401.393 24.5004   1
   3   1   9 39.7720 3.93837   1
   3   1  -9 32.5831 14.0395  -2
  -3  -1  -9 32.5831 14.0395   1
   3  -1  10 637.971 18.6281   1
   3   1 -10 858.646 13.8956  -2
  -3  -1 -10 858.646 13.8956   1
   3   1  11 93.8044 10.0788   1
   3   1 -11 85.5305 6.76163  -2
  -3  -1 -11 85.5305 6.76163   1
   3   1  12 1263.27 28.1894   1
   3   1 -12 1359.67 53.4733  -2
  -3  -1 -12 1359.67 53.4733   1
   3   1  13 14.4185 8.97345   1
   3   1 -13 4.27959 21.1705  -2
  -3  -1 -13 4.27959 21.1705   1
   3   1  14 351.453 17.6516   1
  -3   1  14 502.472 22.1236  -2
   3  -1  14 502.472 22.1236   1
  -3  -1 -15 63.9274 8.26718   1
   3   1  16 498.062 31.7291   1
  -3  -1  16 770.978 27.9160  -2
   3   1  16 770.978 27.9160   1
  -3  -1 -17 1.84674 16.9070   1
  -3   1  17 8.86002 15.1434  -2
   3  -1  17 8.86002 15.1434   1
  -3  -1 -18-3.05071 11.9346   1
  -3  -1  18 12.8015 21.1199  -2
   3   1  18 12.8015 21.1199   1
  -3   1  19 16.3388 24.4472  -2
   3  -1  19 16.3388 24.4472   1
  -3  -2  20 99.6898 29.7614   1
  -3  -2  19-29.3416 17.0949   1
   3  -2  19 44.1820 46.4342  -2
  -3   2  19 44.1820 46.4342   1
  -3  -2  18 255.243 35.3880   1
   3  -2  18 217.385 39.7948  -2
  -3   2  18 217.385 39.7948   1
  -3   2  17 18.2569 22.3115   1
   3  -2  17-10.6514 16.9683  -2
  -3   2  17-10.6514 16.9683   1
  -3  -2  16 464.115 37.9770   1
   3  -2  16 476.847 25.7627  -2
  -3   2  16 476.847 25.7627   1
  -3   2  15 13.9957 25.5219   1
   3  -2  15 41.8300 14.8599  -2
  -3   2  15 41.8300 14.8599   1
  -3  -2  14 71.6219 19.1096   1
   3  -2  14 92.8109 20.2182  -2
  -3   2  14 92.8109 20.2182   1
  -3  -2  13 201.674 24.5816   1
   3  -2  13 178.173 21.1775  -2
  -3   2  13 178.173 21.1775   1
  -3  -2  12 105.276 8.40501   1
   3  -2  12 109.483 21.6236  -2
  -3   2  12 109.483 21.6236   1
  -3  -2  11 15.4693 6.00365   1
   3  -2  11-2.46501 16.0120  -2
  -3   2  11-2.46501 16.0120   1
   3  -2 -10 1359.32 16.5290   1
  -3   2   9 36.1100 4.07908   1
   3  -2  -8 322.198 7.10718   1
   3  -2  -7 42.5498 2.71192   1
   3  -2  -6 5705.82 24.5001   1
   3   2   6 7327.64 36.4601  -2
  -3  -2   6 7327.64 36.4601   1
  -3   2   5 14.4152 2.00202   1
   3   2   5 15.3817 9.40842  -2
  -3  -2   5 15.3817 9.40842   1
  -3   2   4 1860.47 8.21083   1
  -3  -2   3 627.460 3.90090   1
   3  -2  -2 2089.53 7.02604   1
   3   2  -1 449.324 3.83607   1
  -3   2   0 111.051 2.45397   1
   3   2   1 228.529 3.33436   1
   3   2   2 682.876 6.16851   1
   3   2   3 178.540 3.08086   1
  -3   2  -4 975.997 8.94550   1
   3   2   5 8.74776 2.04961   1
   3   2   6 4937.22 16.1962   1
   3   2   7 7.00213 1.71935   1
   3   2  -7 4.30513 12.2233  -2
  -3  -2  -7 4.30513 12.2233   1
   3   2   8 740.935 8.04402   1
   3   2  -8 770.568 32.0642  -2
  -3  -2  -8 770.568 32.0642   1
   3  -2   9 202.103 5.61976   1
   3   2  -9 187.267 20.5428  -2
  -3  -2  -9 187.267 20.5428   1
   3   2  10 1728.60 27.2774   1
   3   2 -10 1563.66 36.1887  -2
  -3  -2 -10 1563.66 36.1887   1
  -3  -2 -11 5.08663 6.67599   1
   3  -2 -11 14.7724 12.3191  -2
  -3   2 -11 14.7724 12.3191   1
   3   2  12 21.0118 8.68411   1
   3  -2 -12 26.6643 13.8325  -2
  -3   2 -12 26.6643 13.8325   1
   3  -2  13 48.9072 10.6986   1
  -3  -2  13 83.5266 12.4367  -2
   3   2  13 83.5266 12.4367   1
   3   2  14 1.85186 7.00291   1
   3   2 -14 20.9294 23.7932  -2
  -3  -2 -14 20.9294 23.7932   1
   3   2  15 9.67291 8.77023   1
  -3   2  15 6.47680 13.5532  -2
   3  -2  15 6.47680 13.5532   1
   3  -2  16 182.717 18.0048   1
  -3  -2  16 402.397 22.1991  -2
   3   2  16 402.397 22.1991   1
  -3   2 -17 5.04436 13.1257   1
  -3   2  17 34.4529 15.7638  -2
   3  -2  17 34.4529 15.7638   1
  -3   2 -18 166.534 20.4850   1
  -3  -2  18 328.971 30.4010  -2
   3   2  18 328.971 30.4010   1
   3  -2  19 5.57260 18.9764   1
  -3  -3  19 54.3557 26.3462   1
   3   3  18 44.0437 25.7430  -2
  -3  -3  18 44.0437 25.7430   1
  -3  -3  17 4.45767 20.8689   1
   3  -3  17 110.469 46.8809  -2
  -3   3  17 110.469 46.8809   1
   3  -3  16 554.911 22.3048  -2
  -3   3  16 554.911 22.3048   1
  -3  -3  15 127.916 24.6417   1
   3  -3  15 112.662 17.2789  -2
  -3   3  15 112.662 17.2789   1
  -3  -3  14 174.747 26.3168   1
   3  -3  14 287.128 19.4947  -2
  -3   3  14 287.128 19.4947   1
  -3  -3  13 18.6218 14.1841   1
   3  -3  13 24.4405 14.9511  -2
  -3   3  13 24.4405 14.9511   1
  -3   3  12 1147.57 23.3574   1
   3  -3  12 1282.27 25.4978  -2
  -3   3  12 1282.27 25.4978   1
  -3  -3  11 10.8538 4.59399   1
   3  -3  11 18.2378 20.2737  -2
  -3   3  11 18.2378 20.2737   1
   3  -3 -10 704.832 12.2037   1
   3  -3  10 700.564 36.9388  -2
  -3   3  10 700.564 36.9388   1
  -3   3   9 165.277 5.50165   1
  -3   3   8 374.504 7.36025   1
   3  -3   8 373.365 25.4036  -2
  -3   3   8 373.365 25.4036   1
   3  -3  -7 829.092 8.55990   1
   3   3   7 837.012 18.6127  -2
  -3  -3   7 837.012 18.6127   1
   3  -3  -6 240.654 5.50550   1
   3   3   6 234.685 8.14987  -2
  -3  -3   6 234.685 8.14987   1
   3   3  -5 428.412 6.00141   1
   3   3   5 508.213 17.5610  -2
  -3  -3   5 508.213 17.5610   1
   3   3  -4 776.228 5.44256   1
   3  -3   4 1534.27 18.2582  -2
  -3   3   4 1534.27 18.2582   1
  -3  -3   3 493.173 3.58444   1
  -3  -3   2 325.249 3.09733   1
  -3   3   1 488.354 3.63099   1
   3   3   0 8129.43 20.9143   1
   3  -3   1 464.106 5.47595   1
   3   3   2 1732.81 10.4545   1
   3   3   3 839.130 7.28753   1
   3   3   4 2045.65 10.1299   1
  -3  -3  -5 295.059 4.65803   1
   3  -3   6 18.7982 2.02565   1
   3  -3   7 350.448 6.14875   1
   3  -3  -7 546.321 26.8575  -2
  -3   3  -7 546.321 26.8575   1
   3  -3   8 31.0547 2.52824   1
   3  -3  -8 121.770 12.3136  -2
  -3   3  -8 121.770 12.3136   1
   3   3   9 369.329 6.13221   1
   3  -3  -9 361.941 18.2825  -2
  -3   3  -9 361.941 18.2825   1
   3   3  10 298.048 9.92438   1
   3  -3 -10 400.218 20.1973  -2
  -3   3 -10 400.218 20.1973   1
   3  -3  11 98.7795 7.15756   1
   3   3 -11 105.692 15.1909  -2
  -3  -3 -11 105.692 15.1909   1
   3   3  12 1178.31 27.9832   1
   3  -3 -12 1289.75 26.1198  -2
  -3   3 -12 1289.75 26.1198   1
   3   3  13 11.0481 8.96510   1
   3  -3 -13 7.26114 10.1897  -2
  -3   3 -13 7.26114 10.1897   1
   3   3  14 304.512 17.5608   1
  -3  -3  14 349.483 17.4994  -2
   3   3  14 349.483 17.4994   1
   3   3  15 50.1391 10.3549   1
  -3   3  15 84.4506 15.3623  -2
   3  -3  15 84.4506 15.3623   1
  -3  -3 -16 530.141 21.3103   1
  -3   3  16 690.115 23.0754  -2
   3  -3  16 690.115 23.0754   1
   3  -3  17 15.9817 11.1495   1
  -3   3  18-34.1806 24.1307  -2
   3  -3  18-34.1806 24.1307   1
  -3   3  19 61.9585 27.7670  -2
   3  -3  19 61.9585 27.7670   1
  -3   4  19-24.7047 29.9682   1
  -3   4  18 187.607 26.5517   1
   3  -4  18 207.807 30.5483  -2
  -3   4  18 207.807 30.5483   1
  -3  -4  17 13.8289 22.8891   1
   3  -4  17 34.6663 35.8031  -2
  -3   4  17 34.6663 35.8031   1
  -3   4  16 353.473 31.4517   1
   3  -4  16 295.386 31.0026  -2
  -3   4  16 295.386 31.0026   1
  -3  -4  15 51.3037 18.0193   1
   3  -4  15 99.0526 17.3850  -2
  -3   4  15 99.0526 17.3850   1
   3   4 -14 11.7269 10.6340   1
   3  -4  14 21.6152 12.6258  -2
  -3   4  14 21.6152 12.6258   1
  -3  -4  13 296.576 30.0687   1
   3  -4  13 385.721 18.6601  -2
  -3   4  13 385.721 18.6601   1
  -3  -4  12 71.4769 19.3842   1
   3  -4  12 63.4573 17.0863  -2
  -3   4  12 63.4573 17.0863   1
  -3   4  11 94.7075 10.7045   1
   3  -4  11 143.960 22.4745  -2
  -3   4  11 143.960 22.4745   1
  -3   4  10 777.227 12.6954   1
   3  -4  10 1066.92 25.0389  -2
  -3   4  10 1066.92 25.0389   1
  -3   4   9 432.059 7.28646   1
   3  -4   9 515.618 29.0002  -2
  -3   4   9 515.618 29.0002   1
  -3   4   8 299.317 4.32257   1
   3  -4   8 452.455 17.3049  -2
  -3   4   8 452.455 17.3049   1
   3  -4  -7 12.5125 2.27290   1
   3  -4   7 38.6877 9.28131  -2
  -3   4   7 38.6877 9.28131   1
  -3  -4   6 1052.37 25.3052   1
   3   4   6 3928.15 32.7157  -2
  -3  -4   6 3928.15 32.7157   1
  -3  -4   5 120.950 3.22453   1
   3   4   5 203.935 13.1605  -2
  -3  -4   5 203.935 13.1605   1
  -3   4   4 903.205 5.83788   1
   3  -4   4 987.419 21.4912  -2
  -3   4   4 987.419 21.4912   1
   3  -4  -3 637.278 4.73084   1
  -3   4   2 1587.36 6.97214   1
  -3   4   1 1175.75 5.89285   1
   3   4   0 21.8797 1.78382   1
   3  -4   1 840.939 7.41138   1
   3   4   2 292.634 4.96028   1
   3   4   3 1196.63 7.57383   1
   3  -4   4 308.122 4.04931   1
   3   4   5 266.099 4.53389   1
   3   4   6 2769.61 13.9279   1
   3  -4   7 79.1326 4.02283   1
   3  -4  -7 86.4918 10.6033  -2
  -3   4  -7 86.4918 10.6033   1
   3   4   8 523.720 8.98696   1
   3  -4  -8 588.616 18.7244  -2
  -3   4  -8 588.616 18.7244   1
  -3  -4  -9 575.083 9.12682   1
  -3  -4   9 593.758 20.0568  -2
   3   4   9 593.758 20.0568   1
   3  -4  10 1599.77 23.6893   1
   3   4 -10 1364.88 33.8085  -2
  -3  -4 -10 1364.88 33.8085   1
   3   4  11 284.284 9.87816   1
   3  -4 -11 223.241 16.0816  -2
  -3   4 -11 223.241 16.0816   1
   3   4  12 7.05864 10.2210   1
   3  -4 -12 22.3654 9.11746  -2
  -3   4 -12 22.3654 9.11746   1
   3   4  13 386.832 25.5868   1
   3   4 -13 400.061 14.3761  -2
  -3  -4 -13 400.061 14.3761   1
   3  -4  14-0.11065 7.28638   1
  -3  -4  14 21.0416 15.1471  -2
   3   4  14 21.0416 15.1471   1
  -3   4 -15 94.5182 11.3912   1
   3   4 -15 114.666 16.0177  -2
  -3  -4 -15 114.666 16.0177   1
  -3  -4 -16 91.2307 14.1474   1
  -3   4  16 202.192 21.3300  -2
   3  -4  16 202.192 21.3300   1
  -3  -4 -17 33.6498 12.8075   1
  -3  -4  17 38.5647 49.0791  -2
   3   4  17 38.5647 49.0791   1
  -3   4  18 208.534 33.1250  -2
   3  -4  18 208.534 33.1250   1
  -3   5  18 10.0621 11.9582   1
   3  -5  18 52.8653 43.6728  -2
  -3   5  18 52.8653 43.6728   1
  -3   5  17 75.1350 13.3604   1
   3  -5  17 125.872 45.1946  -2
  -3   5  17 125.872 45.1946   1
  -3   5  16 218.854 26.7949   1
   3  -5  16 187.065 28.3248  -2
  -3   5  16 187.065 28.3248   1
  -3  -5  15 265.494 32.2895   1
   3  -5  15 228.097 24.1632  -2
  -3   5  15 228.097 24.1632   1
  -3  -5  14 53.4388 21.5661   1
   3  -5  14 87.1169 19.5377  -2
  -3   5  14 87.1169 19.5377   1
   3   5 -13 26.9536 11.2029   1
   3  -5  13 2.04505 15.6418  -2
  -3   5  13 2.04505 15.6418   1
   3   5 -12 626.446 25.8132   1
   3  -5  12 780.863 30.9281  -2
  -3   5  12 780.863 30.9281   1
   3   5 -11 10.3502 4.08666   1
   3  -5  11 29.1162 13.7404  -2
  -3   5  11 29.1162 13.7404   1
   3   5 -10 442.864 10.8179   1
  -3   5 -10 758.657 15.5708  -2
   3  -5 -10 758.657 15.5708   1
  -3  -5   9 578.627 10.4118   1
   3  -5   9 658.293 30.3055  -2
  -3   5   9 658.293 30.3055   1
  -3  -5   8 233.400 5.32786   1
  -3   5  -8 252.633 15.9216  -2
   3  -5  -8 252.633 15.9216   1
   3  -5  -7 1472.26 10.4813   1
   3   5   7 1674.06 24.3821  -2
  -3  -5   7 1674.06 24.3821   1
  -3  -5   6 9.24606 1.85723   1
   3  -5   6 4.72726 8.65147  -2
  -3   5   6 4.72726 8.65147   1
   3  -5  -5 665.198 6.12778   1
   3   5   5 813.181 20.6051  -2
  -3  -5   5 813.181 20.6051   1
   3   5  -4 872.355 7.43562   1
   3   5   4 1609.46 18.4248  -2
  -3  -5   4 1609.46 18.4248   1
  -3   5   3 1995.85 9.82323   1
   3  -5   3 2302.29 28.6997  -2
  -3   5   3 2302.29 28.6997   1
  -3   5   2 243.000 3.37641   1
   3  -5  -1 4.64386 1.19950   1
   3   5   0 2980.80 13.1471   1
   3  -5   1 2.67288 1.72186   1
   3  -5   2 384.363 5.65975   1
   3   5   3 797.303 7.14167   1
   3   5   4 1792.68 9.59994   1
   3  -5   5 554.338 4.79708   1
   3   5   6 1.41079 2.18125   1
  -3   5  -7 787.899 9.98731   1
   3   5  -7 1162.54 35.4062  -2
  -3  -5  -7 1162.54 35.4062   1
   3   5   8 10.9547 3.67318   1
   3   5  -8 50.2942 12.5287  -2
  -3  -5  -8 50.2942 12.5287   1
   3   5   9 359.144 12.7040   1
   3  -5  -9 475.796 20.8640  -2
  -3   5  -9 475.796 20.8640   1
   3   5  10 154.323 5.87987   1
   3  -5 -10 269.435 16.4962  -2
  -3   5 -10 269.435 16.4962   1
  -3  -5 -11 61.5672 11.9652   1
   3  -5 -11 23.9185 12.3735  -2
  -3   5 -11 23.9185 12.3735   1
   3   5  12 506.004 22.2004   1
   3  -5 -12 514.674 23.1045  -2
  -3   5 -12 514.674 23.1045   1
   3  -5  13 51.2885 12.0112   1
  -3  -5  13 47.1963 10.1116  -2
   3   5  13 47.1963 10.1116   1
   3  -5  14 109.499 10.4148   1
  -3  -5  14 142.584 16.7092  -2
   3   5  14 142.584 16.7092   1
   3   5  15 50.3891 9.55339   1
  -3  -5  15 77.8029 46.1455  -2
   3   5  15 77.8029 46.1455   1
   3  -5  16 244.218 14.0035   1
  -3   5 -17 65.6181 18.4334   1
  -3   5  17 108.496 30.5408  -2
   3  -5  17 108.496 30.5408   1
   3  -6  18 58.5509 42.3133  -2
  -3   6  18 58.5509 42.3133   1
  -3  -6  17 6.40611 11.6638   1
   3  -6  17 8.13345 36.0585  -2
  -3   6  17 8.13345 36.0585   1
  -3   6  16 64.2098 12.3007   1
   3  -6  16 98.7736 40.8511  -2
  -3   6  16 98.7736 40.8511   1
  -3  -6  15 72.7064 10.2253   1
   3  -6  15 20.8009 33.1031  -2
  -3   6  15 20.8009 33.1031   1
  -3  -6  14 10.4551 9.64933   1
   3  -6  14-1.47894 16.0447  -2
  -3   6  14-1.47894 16.0447   1
   3   6 -13 458.081 17.4076   1
   3  -6  13 616.212 22.7763  -2
  -3   6  13 616.212 22.7763   1
  -3  -6  12-0.06835 6.84702   1
   3  -6  12-3.42148 13.3069  -2
  -3   6  12-3.42148 13.3069   1
   3   6 -11 311.111 13.3570   1
   3  -6  11 385.668 22.0251  -2
  -3   6  11 385.668 22.0251   1
   3  -6 -10 417.047 15.6999   1
   3  -6  10 491.776 17.7833  -2
  -3   6  10 491.776 17.7833   1
  -3  -6   9 937.567 16.5362   1
  -3   6  -9 1106.76 13.8804  -2
   3  -6  -9 1106.76 13.8804   1
  -3  -6   8 6.63329 2.55814   1
   3  -6   8 49.5655 10.7721  -2
  -3   6   8 49.5655 10.7721   1
  -3  -6   7 5.52255 2.28288   1
   3  -6   7 41.0235 9.73874  -2
  -3   6   7 41.0235 9.73874   1
   3  -6  -6 1060.78 7.45085   1
   3   6  -5 10.4086 1.91281   1
   3   6  -4 324.394 4.93462   1
   3   6  -3 741.548 7.02482   1
   3   6  -2 543.260 5.30531   1
   3   6  -1 1162.89 7.51865   1
  -3   6  -1 1506.41 13.6946  -2
   3  -6  -1 1506.41 13.6946   1
   3  -6   0 2.70633 1.39970   1
  -3  -6   0 3.28989 4.10627  -2
   3   6   0 3.28989 4.10627   1
  -3  -6  -1 1319.31 9.19704   1
   3  -6   2 280.919 5.11823   1
   3  -6   3 1883.92 10.7678   1
   3   6   4 177.594 3.46381   1
   3   6   5 208.451 4.16145   1
  -3  -6  -6 1476.06 14.3638   1
  -3  -6   6 1780.01 32.3327  -2
   3   6   6 1780.01 32.3327   1
   3   6   7 79.4718 5.50597   1
  -3  -6   7 65.8319 10.2382  -2
   3   6   7 65.8319 10.2382   1
  -3   6  -8 82.7603 5.13566   1
  -3  -6   8 90.5572 11.2920  -2
   3   6   8 90.5572 11.2920   1
  -3  -6  -9 545.597 10.9841   1
  -3   6   9 713.311 17.2427  -2
   3  -6   9 713.311 17.2427   1
  -3  -6 -10 326.611 10.9231   1
   3   6 -10 437.205 12.9072  -2
  -3  -6 -10 437.205 12.9072   1
  -3  -6 -11 301.344 12.8667   1
   3  -6 -11 357.214 13.0811  -2
  -3   6 -11 357.214 13.0811   1
   3   6  12-4.10373 16.6517   1
   3  -6 -12-9.65272 14.2512  -2
  -3   6 -12-9.65272 14.2512   1
   3   6  13 584.711 27.0068   1
   3   6 -13 543.534 22.3644  -2
  -3  -6 -13 543.534 22.3644   1
   3  -6  14 39.4800 12.4152   1
   3  -6 -14 17.6601 15.0362  -2
  -3   6 -14 17.6601 15.0362   1
   3  -6  15 131.027 12.3996   1
  -3  -6  15 129.852 31.0620  -2
   3   6  15 129.852 31.0620   1
  -3   6 -16 51.0959 10.6608   1
  -3  -6  16 76.6313 49.1156  -2
   3   6  16 76.6313 49.1156   1
  -3  -6 -17 56.7813 13.8551   1
  -3  -7  17 64.6532 12.9087   1
  -3  -7 -17 87.4993 20.5483  -2
   3   7 -17 87.4993 20.5483   1
  -3  -7  16 46.3102 12.0703   1
   3  -7  16 38.8082 35.0896  -2
  -3   7  16 38.8082 35.0896   1
  -3  -7  15 238.271 15.6258   1
   3  -7  15 137.112 36.8978  -2
  -3   7  15 137.112 36.8978   1
  -3  -7  14 31.9887 10.0008   1
   3  -7  14 20.3678 16.3421  -2
  -3   7  14 20.3678 16.3421   1
  -3  -7  13-1.77176 7.18514   1
   3  -7  13-0.96094 15.4382  -2
  -3   7  13-0.96094 15.4382   1
  -3   7  12 306.704 13.8277   1
   3  -7  12 318.221 21.3914  -2
  -3   7  12 318.221 21.3914   1
   3   7 -11-0.75311 6.99790   1
   3  -7  11 34.4179 11.9957  -2
  -3   7  11 34.4179 11.9957   1
   3   7 -10 99.9198 8.41259   1
  -3   7 -10 144.022 13.4408  -2
   3  -7 -10 144.022 13.4408   1
   3   7  -9 138.064 8.50150   1
  -3   7  -9 306.135 15.2701  -2
   3  -7  -9 306.135 15.2701   1
  -3   7   8 101.926 5.08968   1
   3  -7   8 105.741 11.1168  -2
  -3   7   8 105.741 11.1168   1
  -3  -7   7 737.744 6.94931   1
   3  -7   7 1101.71 19.3226  -2
  -3   7   7 1101.71 19.3226   1
  -3  -7   6 78.3030 2.74354   1
   3   7  -5 982.595 7.96998   1
   3   7  -4 382.814 6.80385   1
   3  -7   4 741.191 19.0682  -2
  -3   7   4 741.191 19.0682   1
   3  -7  -3 2225.44 17.6966   1
   3  -7  -2 12.7515 2.21113   1
   3   7  -1 224.503 4.17007   1
   3   7   0 941.339 6.74305   1
  -3   7   0 1237.91 12.6290  -2
   3  -7   0 1237.91 12.6290   1
   3  -7   1 209.904 4.32841   1
  -3  -7   1 248.472 6.95476  -2
   3   7   1 248.472 6.95476   1
   3   7   2 116.740 3.74802   1
   3   7   3 1143.43 9.75596   1
   3   7   4 838.098 8.29548   1
   3   7   5 504.009 6.26359   1
   3   7   6 79.9174 3.43455   1
  -3  -7   6 85.0953 11.1257  -2
   3   7   6 85.0953 11.1257   1
   3  -7   7 938.841 13.4917   1
  -3  -7   7 1104.84 22.7312  -2
   3   7   7 1104.84 22.7312   1
   3  -7   8 11.2230 4.23383   1
  -3  -7   8 32.0085 9.24421  -2
   3   7   8 32.0085 9.24421   1
  -3   7  -9 331.812 14.3649   1
   3   7  -9 676.511 13.1454  -2
  -3  -7  -9 676.511 13.1454   1
   3   7  10 95.9288 9.48926   1
   3  -7 -10 73.9864 6.96167  -2
  -3   7 -10 73.9864 6.96167   1
   3  -7  11 149.123 11.8640   1
  -3  -7  11 161.551 10.4878  -2
   3   7  11 161.551 10.4878   1
  -3  -7 -12 139.147 16.1582   1
   3  -7 -12 163.442 18.9704  -2
  -3   7 -12 163.442 18.9704   1
  -3   7 -13 16.1573 12.5247   1
  -3  -7  13 5.63225 14.9815  -2
   3   7  13 5.63225 14.9815   1
   3  -7  14 29.8508 11.3415   1
   3   7 -14 22.2057 16.9737  -2
  -3  -7 -14 22.2057 16.9737   1
  -3   7 -15 79.7709 13.5273   1
  -3  -7  15 119.187 20.5992  -2
   3   7  15 119.187 20.5992   1
  -3   7 -16 83.9142 11.6866   1
   3   7 -16 133.586 46.1993  -2
  -3  -7 -16 133.586 46.1993   1
  -3  -7 -17 50.8121 16.3773   1
  -3   8  17 23.5750 13.5508   1
   3  -8  17 17.8677 18.5979  -2
  -3   8  17 17.8677 18.5979   1
  -3  -8  16-0.57202 11.1619   1
  -3  -8 -16 37.2041 22.9483  -2
   3   8 -16 37.2041 22.9483   1
  -3   8  15 63.4331 11.9220   1
   3  -8  15 100.092 33.7915  -2
  -3   8  15 100.092 33.7915   1
  -3   8  14-0.30172 10.6424   1
   3  -8  14 75.1629 29.2084  -2
  -3   8  14 75.1629 29.2084   1
  -3  -8  13 727.421 19.8825   1
   3  -8  13 750.571 30.0206  -2
  -3   8  13 750.571 30.0206   1
   3   8 -12-0.96153 7.66095   1
   3  -8  12 53.1609 15.3147  -2
  -3   8  12 53.1609 15.3147   1
  -3   8  11 258.173 11.5952   1
  -3   8 -11 308.471 17.6110  -2
   3  -8 -11 308.471 17.6110   1
   3   8 -10 171.814 9.72717   1
   3  -8  10 165.581 14.6233  -2
  -3   8  10 165.581 14.6233   1
   3   8  -9 680.036 15.0131   1
   3  -8   9 782.686 22.0602  -2
  -3   8   9 782.686 22.0602   1
   3   8  -8 49.7488 5.11996   1
  -3   8  -8 54.4192 10.3570  -2
   3  -8  -8 54.4192 10.3570   1
  -3  -8   7 15.0041 3.25085   1
   3  -8   7 38.8828 8.73925  -2
  -3   8   7 38.8828 8.73925   1
   3   8  -6 256.229 5.43351   1
   3  -8   6 431.759 22.8135  -2
  -3   8   6 431.759 22.8135   1
  -3   8   5 2.16676 2.41953   1
  -3   8   4 13.3552 2.11140   1
   3   8  -3 1002.79 12.6877   1
   3   8  -2 39.9549 3.84766   1
   3  -8  -1 918.187 8.53709   1
  -3   8  -1 1417.64 20.2370  -2
   3  -8  -1 1417.64 20.2370   1
   3   8   0 0.91868 2.04818   1
  -3   8   0-1.35716 3.29140  -2
   3  -8   0-1.35716 3.29140   1
   3  -8   1 1525.14 10.1630   1
  -3   8   1 1704.08 11.9398  -2
   3  -8   1 1704.08 11.9398   1
   3   8   2 186.487 4.33525   1
  -3  -8  -3 1301.51 11.3262   1
   3   8   4 59.2388 3.47072   1
   3   8   5 16.8978 3.32398   1
  -3  -8   5 17.2232 9.20031  -2
   3   8   5 17.2232 9.20031   1
   3   8   6 157.346 4.87555   1
  -3  -8   6 215.512 14.0572  -2
   3   8   6 215.512 14.0572   1
   3  -8   7 26.6673 5.11196   1
  -3  -8   7 29.3425 8.61493  -2
   3   8   7 29.3425 8.61493   1
   3  -8   8 7.28580 4.96094   1
  -3  -8   8 16.9792 7.92546  -2
   3   8   8 16.9792 7.92546   1
  -3  -8  -9 427.625 12.0654   1
  -3  -8   9 381.508 10.1146  -2
   3   8   9 381.508 10.1146   1
   3  -8  10 136.726 8.94285   1
  -3  -8  10 160.081 8.18513  -2
   3   8  10 160.081 8.18513   1
   3  -8  11 132.991 11.0849   1
  -3  -8  11 222.115 26.4685  -2
   3   8  11 222.115 26.4685   1
  -3   8 -12 0.66575 7.72113   1
  -3  -8  12 49.1523 30.7867  -2
   3   8  12 49.1523 30.7867   1
  -3  -8 -13 480.830 24.7926   1
   3   8 -13 599.225 28.4405  -2
  -3  -8 -13 599.225 28.4405   1
   3   8  14 4.14141 9.42904   1
  -3  -8  14 43.0514 26.0177  -2
   3   8  14 43.0514 26.0177   1
  -3   8 -15 124.279 15.1739   1
   3   8 -15 153.312 24.0837  -2
  -3  -8 -15 153.312 24.0837   1
   3   8  16-8.73068 9.82352   1
   3   8 -16-16.9897 36.6434  -2
  -3  -8 -16-16.9897 36.6434   1
  -3   8 -17 55.4550 16.4834   1
   3   9 -17 69.7196 17.9127   1
  -3  -9  16 40.6509 13.1028   1
   3  -9  16 46.0816 17.8071  -2
  -3   9  16 46.0816 17.8071   1
  -3  -9  15 242.497 15.1244   1
  -3  -9 -15 298.217 29.8341  -2
   3   9 -15 298.217 29.8341   1
  -3  -9  14 5.65930 11.0001   1
   3  -9  14-11.0671 29.0013  -2
  -3   9  14-11.0671 29.0013   1
  -3  -9  13 21.1707 8.22005   1
   3  -9  13-20.0341 22.7850  -2
  -3   9  13-20.0341 22.7850   1
  -3   9  12 15.1953 7.55995   1
  -3   9 -12 29.6644 13.9328  -2
   3  -9 -12 29.6644 13.9328   1
   3   9 -11 2.04214 6.71564   1
  -3   9 -11-7.40665 11.7483  -2
   3  -9 -11-7.40665 11.7483   1
   3   9 -10-3.01350 6.05784   1
   3  -9  10 1.41643 11.4245  -2
  -3   9  10 1.41643 11.4245   1
   3   9  -9 265.244 10.3254   1
   3  -9   9 396.952 17.7148  -2
  -3   9   9 396.952 17.7148   1
  -3   9   8 6.00541 4.19342   1
   3  -9   8 27.1091 11.7241  -2
  -3   9   8 27.1091 11.7241   1
  -3  -9   7 1113.09 13.7876   1
   3  -9   7 1278.34 28.7946  -2
  -3   9   7 1278.34 28.7946   1
   3   9  -6 40.5155 4.65329   1
   3  -9   6 47.9270 13.8182  -2
  -3   9   6 47.9270 13.8182   1
   3   9  -5 774.248 10.7877   1
   3  -9   5 1153.66 33.7456  -2
  -3   9   5 1153.66 33.7456   1
   3  -9  -4 14.7872 2.49536   1
   3   9  -3 1464.76 12.3185   1
   3   9  -2 5.38456 2.75064   1
   3   9  -1 15.9285 2.59548   1
   3   9   0 213.281 5.17121   1
  -3  -9   0 324.932 8.18649  -2
   3   9   0 324.932 8.18649   1
   3  -9   1 91.5215 2.83726   1
  -3  -9   1 100.762 4.74568  -2
   3   9   1 100.762 4.74568   1
   3   9   2 8.59468 2.94549   1
  -3   9   2 16.7348 4.42646  -2
   3  -9   2 16.7348 4.42646   1
   3   9   3 529.300 8.37349   1
   3   9   4 142.599 6.26920   1
   3   9   5 459.906 8.42706   1
   3  -9   6 4.84002 3.11234   1
  -3  -9   6 23.7415 17.7363  -2
   3   9   6 23.7415 17.7363   1
   3   9   7 1153.03 11.0911   1
  -3  -9   7 1553.73 53.7985  -2
   3   9   7 1553.73 53.7985   1
   3  -9   8 16.0604 2.15461   1
  -3  -9   8-5.27723 21.7378  -2
   3   9   8-5.27723 21.7378   1
  -3   9  -9 440.115 12.4205   1
  -3  -9   9 446.051 39.8042  -2
   3   9   9 446.051 39.8042   1
   3   9  10 1.32154 5.82899   1
  -3  -9  10 28.6099 25.5102  -2
   3   9  10 28.6099 25.5102   1
  -3  -9 -11 69.0625 8.75403   1
  -3  -9  11 94.1830 29.2561  -2
   3   9  11 94.1830 29.2561   1
   3  -9  12 15.4174 9.82127   1
   3   9 -12 29.0039 15.1225  -2
  -3  -9 -12 29.0039 15.1225   1
  -3   9 -13 35.1277 9.55962   1
  -3  -9  13 63.2655 24.6827  -2
   3   9  13 63.2655 24.6827   1
   3   9  14-8.34871 8.86388   1
   3   9 -14 7.90984 37.8534  -2
  -3  -9 -14 7.90984 37.8534   1
  -3   9 -15 50.1307 15.7560   1
   3   9 -15 144.187 22.9429  -2
  -3  -9 -15 144.187 22.9429   1
  -3   9 -16 22.7224 11.1748   1
  -3  10  16-2.67149 15.1010   1
  -3 -10 -16-7.73188 29.9210  -2
   3  10 -16-7.73188 29.9210   1
  -3  10  15 75.5818 21.4744   1
   3 -10  15 57.0493 24.7526  -2
  -3  10  15 57.0493 24.7526   1
  -3 -10  14 12.8700 14.4308   1
   3 -10  14-18.3193 19.3036  -2
  -3  10  14-18.3193 19.3036   1
   3  10 -13 308.865 13.7662   1
   3 -10  13 344.281 40.9891  -2
  -3  10  13 344.281 40.9891   1
  -3 -10  12-11.7397 6.67783   1
   3 -10  12 7.48389 15.5685  -2
  -3  10  12 7.48389 15.5685   1
   3  10 -11 138.703 9.55990   1
   3 -10  11 147.712 15.9093  -2
  -3  10  11 147.712 15.9093   1
  -3 -10  10 26.1239 6.72790   1
   3 -10  10 12.0334 12.1728  -2
  -3  10  10 12.0334 12.1728   1
  -3 -10   9 582.874 13.6228   1
   3 -10   9 703.764 28.1014  -2
  -3  10   9 703.764 28.1014   1
   3  10  -8-0.76190 4.13055   1
   3 -10   8 2.61078 15.9707  -2
  -3  10   8 2.61078 15.9707   1
  -3 -10   7 10.2927 4.09698   1
   3 -10   7 35.9982 12.3234  -2
  -3  10   7 35.9982 12.3234   1
   3  10  -6 10.3174 6.97559   1
   3 -10   6 55.7603 15.2992  -2
  -3  10   6 55.7603 15.2992   1
   3 -10  -5 9.93036 2.94661   1
   3 -10   5 17.6810 14.5935  -2
  -3  10   5 17.6810 14.5935   1
   3 -10  -4 31.2151 3.37955   1
   3 -10   4 59.7233 11.3996  -2
  -3  10   4 59.7233 11.3996   1
  -3 -10   3 425.758 7.83553   1
   3 -10   3 591.208 26.3961  -2
  -3  10   3 591.208 26.3961   1
   3 -10  -2 2.38153 2.33102   1
   3  10  -1 751.513 9.56203   1
  -3  10  -1 759.545 14.5170  -2
   3 -10  -1 759.545 14.5170   1
   3 -10   0 7.15245 3.85231   1
  -3 -10   0-0.92685 3.31258  -2
   3  10   0-0.92685 3.31258   1
   3  10   1 730.741 10.6724   1
  -3  10   1 863.867 10.8083  -2
   3 -10   1 863.867 10.8083   1
   3 -10   2 16.1450 1.88095   1
  -3  10   2 7.77757 5.89421  -2
   3 -10   2 7.77757 5.89421   1
   3  10   3 793.630 7.64100   1
   3 -10   4 15.5054 3.76639   1
  -3 -10   4 49.1152 16.4588  -2
   3  10   4 49.1152 16.4588   1
   3  10   5 98.9512 6.47720   1
  -3 -10   5 86.7774 18.9977  -2
   3  10   5 86.7774 18.9977   1
   3  10   6 8.23137 4.35572   1
  -3 -10   6 45.7717 19.3572  -2
   3  10   6 45.7717 19.3572   1
   3  10   7 109.107 10.7663   1
  -3 -10   7 123.438 23.9409  -2
   3  10   7 123.438 23.9409   1
   3 -10   8 21.3099 5.54276   1
  -3 -10   8 9.19572 21.4870  -2
   3  10   8 9.19572 21.4870   1
  -3 -10  -9 300.171 10.6411   1
  -3 -10   9 407.999 37.9279  -2
   3  10   9 407.999 37.9279   1
   3 -10  10 33.8008 6.82026   1
   3  10 -10 8.57783 21.3736  -2
  -3 -10 -10 8.57783 21.3736   1
   3 -10  11 102.949 9.99449   1
   3  10 -11 84.3603 24.6835  -2
  -3 -10 -11 84.3603 24.6835   1
   3 -10  12 2.00403 7.35760   1
   3 -10  13 405.148 17.0400   1
   3  10 -13 543.498 58.5442  -2
  -3 -10 -13 543.498 58.5442   1
  -3  10 -14-5.42493 10.7585   1
   3  10 -14 44.7742 39.6869  -2
  -3 -10 -14 44.7742 39.6869   1
  -3  10 -15 117.940 19.1424   1
  -3  10 -16 1.01616 13.6632   1
   3 -11  14-25.2082 27.7639  -2
  -3  11  14-25.2082 27.7639   1
  -3 -11  13 0.02190 10.7907   1
   3 -11  13 25.4673 25.6538  -2
  -3  11  13 25.4673 25.6538   1
   3  11 -12-0.95743 8.61459   1
   3 -11  12-22.7029 24.7546  -2
  -3  11  12-22.7029 24.7546   1
   3  11 -11 8.29616 7.94107   1
   3 -11  11-9.19124 20.9421  -2
  -3  11  11-9.19124 20.9421   1
  -3  11  10 6.50923 8.61367   1
   3 -11  10 36.9142 16.9415  -2
  -3  11  10 36.9142 16.9415   1
   3  11  -9 244.003 13.2632   1
   3 -11   9 344.857 22.5977  -2
  -3  11   9 344.857 22.5977   1
   3  11  -8 15.1663 7.26520   1
   3 -11   8 16.2897 13.8251  -2
  -3  11   8 16.2897 13.8251   1
   3  11  -7 603.657 19.9347   1
   3 -11   7 756.907 26.1943  -2
  -3  11   7 756.907 26.1943   1
  -3 -11   6 4.02929 7.08670   1
   3 -11   6-11.4993 15.4214  -2
  -3  11   6-11.4993 15.4214   1
   3  11  -5 290.699 15.3661   1
   3 -11   5 391.307 15.5865  -2
  -3  11   5 391.307 15.5865   1
  -3 -11   4 0.53845 3.23973   1
   3 -11   4 5.44510 11.8245  -2
  -3  11   4 5.44510 11.8245   1
   3 -11  -3 868.285 7.85857   1
   3 -11   3 919.878 25.5670  -2
  -3  11   3 919.878 25.5670   1
   3 -11  -2 29.0189 5.46558   1
   3 -11   2 61.7797 12.2905  -2
  -3  11   2 61.7797 12.2905   1
   3  11  -1 31.6381 4.93701   1
   3 -11   0 6.67625 4.53402   1
   3  11   0 39.0734 18.1721  -2
  -3 -11   0 39.0734 18.1721   1
   3 -11   1 34.6688 4.82574   1
   3 -11   2 30.7343 4.64087   1
   3  11   3 402.462 4.96055   1
  -3 -11   3 684.310 32.9922  -2
   3  11   3 684.310 32.9922   1
   3 -11   4 5.63521 6.12555   1
  -3 -11   4 25.5292 16.0743  -2
   3  11   4 25.5292 16.0743   1
   3 -11   5 232.576 11.0427   1
  -3 -11   5 320.641 26.6835  -2
   3  11   5 320.641 26.6835   1
   3  11   6 3.32332 6.96300   1
  -3 -11   6-2.99240 17.8164  -2
   3  11   6-2.99240 17.8164   1
   3  11   7 532.604 21.5119   1
  -3 -11   7 699.206 30.1447  -2
   3  11   7 699.206 30.1447   1
  -3 -11  -8 4.21945 8.84284   1
  -3 -11   8 21.9565 22.9392  -2
   3  11   8 21.9565 22.9392   1
   3 -11   9 275.469 17.7425   1
  -3 -11   9 352.344 28.4518  -2
   3  11   9 352.344 28.4518   1
   3  11  10 0.53538 8.00428   1
  -3 -11  10-11.9162 19.6643  -2
   3  11  10-11.9162 19.6643   1
   3 -11  11 31.5201 12.0859   1
   3  11 -11 8.39708 22.4257  -2
  -3 -11 -11 8.39708 22.4257   1
   3 -11  12 28.8079 12.6151   1
   3  11 -12 48.2615 38.0171  -2
  -3 -11 -12 48.2615 38.0171   1
   3 -11  13 21.9641 12.4722   1
   3  11 -13 50.7377 39.7955  -2
  -3 -11 -13 50.7377 39.7955   1
   3  11  14 9.82384 22.8484   1
   3 -12  13 303.803 37.9460  -2
  -3  12  13 303.803 37.9460   1
   3  12 -12 13.7859 15.4076   1
   3 -12  12-0.01771 23.8187  -2
  -3  12  12-0.01771 23.8187   1
  -3 -12  11 131.908 19.7765   1
   3 -12  11 164.272 28.9274  -2
  -3  12  11 164.272 28.9274   1
  -3 -12  10 1.07071 13.9538   1
   3 -12  10 58.0742 22.4207  -2
  -3  12  10 58.0742 22.4207   1
   3  12  -9 327.912 24.9799   1
   3 -12   9 527.831 35.2225  -2
  -3  12   9 527.831 35.2225   1
   3  12  -8 13.2172 13.3517   1
  -3  12  -8 64.4027 16.0044  -2
   3 -12  -8 64.4027 16.0044   1
   3  12  -7 2.66782 9.39048   1
  -3  12  -7 18.0423 11.6413  -2
   3 -12  -7 18.0423 11.6413   1
   3  12  -6 26.3811 10.0085   1
   3 -12   6 24.6738 10.9618  -2
  -3  12   6 24.6738 10.9618   1
   3  12  -5 6.48175 7.60423   1
   3 -12   5 34.9345 13.4760  -2
  -3  12   5 34.9345 13.4760   1
   3  12  -4 106.225 12.5060   1
   3  12   4 124.996 12.3171  -2
  -3 -12   4 124.996 12.3171   1
   3  12  -3 345.982 9.90556   1
   3 -12   3 384.836 19.7589  -2
  -3  12   3 384.836 19.7589   1
   3  12  -2 62.2364 6.30722   1
   3  12   2 88.8152 22.6892  -2
  -3 -12   2 88.8152 22.6892   1
   3  12  -1 413.375 11.0569   1
   3  12   1 649.954 37.6219  -2
  -3 -12   1 649.954 37.6219   1
  -3 -12   0 32.4756 5.41646   1
   3  12   0 58.7101 21.7053  -2
  -3 -12   0 58.7101 21.7053   1
   3 -12   1 439.461 10.7017   1
   3  12  -1 626.223 37.3559  -2
  -3 -12  -1 626.223 37.3559   1
   3 -12   2 0.25564 5.28580   1
  -3 -12   2 16.2851 18.1224  -2
   3  12   2 16.2851 18.1224   1
   3 -12   3 495.178 13.6382   1
  -3 -12   3 641.413 25.6794  -2
   3  12   3 641.413 25.6794   1
   3 -12   4 32.3614 7.21929   1
  -3 -12   4 94.6829 21.1802  -2
   3  12   4 94.6829 21.1802   1
   3  12   5 17.5070 7.89472   1
  -3 -12   5 54.3865 16.0778  -2
   3  12   5 54.3865 16.0778   1
  -3 -12  -6 40.6858 8.71992   1
  -3 -12   6 62.3483 21.0207  -2
   3  12   6 62.3483 21.0207   1
   3  12   7 40.6268 11.5358   1
  -3 -12   7 40.9165 21.7923  -2
   3  12   7 40.9165 21.7923   1
   3  12   8 37.0704 11.9183   1
  -3 -12   8 81.2526 19.3616  -2
   3  12   8 81.2526 19.3616   1
   3  12   9 165.875 15.8566   1
  -3 -12   9 265.659 26.1346  -2
   3  12   9 265.659 26.1346   1
   3 -12  10-1.62325 12.9647   1
  -3 -12  10 34.0534 28.7112  -2
   3  12  10 34.0534 28.7112   1
   3 -12  11 64.3720 18.3814   1
   3  12 -11 46.7836 36.8246  -2
  -3 -12 -11 46.7836 36.8246   1
   3 -12  12 23.6867 16.5400   1
   3  12 -12 60.9257 38.4369  -2
  -3 -12 -12 60.9257 38.4369   1
   3  12  13 137.573 34.4996   1
   3 -13  12 64.4733 26.9341  -2
  -3  13  12 64.4733 26.9341   1
   3  13 -11 17.4006 16.7681   1
   3 -13  11 84.3020 25.8694  -2
  -3  13  11 84.3020 25.8694   1
   3  13 -10 45.4539 17.8503   1
   3 -13  10 79.2464 24.1164  -2
  -3  13  10 79.2464 24.1164   1
   3  13  -9 75.2613 18.9653   1
   3 -13   9 158.472 27.4525  -2
  -3  13   9 158.472 27.4525   1
   3  13  -8 21.1427 16.3007   1
   3 -13   8 30.4818 16.1847  -2
  -3  13   8 30.4818 16.1847   1
   3  13  -7 171.753 20.4485   1
   3 -13   7 296.261 21.1456  -2
  -3  13   7 296.261 21.1456   1
  -3 -13   6 2.30194 9.98253   1
   3  13   6-4.19760 11.7793  -2
  -3 -13   6-4.19760 11.7793   1
  -3 -13   5 166.467 12.4321   1
   3 -13   5 139.467 16.8176  -2
  -3  13   5 139.467 16.8176   1
   3  13  -4 11.3542 10.1705   1
   3 -13   4 29.6878 11.9187  -2
  -3  13   4 29.6878 11.9187   1
   3 -13  -3 329.135 14.8394   1
   3  13   3 417.251 33.4630  -2
  -3 -13   3 417.251 33.4630   1
  -3 -13   2 41.1989 9.26941   1
   3  13   2 66.0904 14.2931  -2
  -3 -13   2 66.0904 14.2931   1
   3  13  -1-5.55781 6.17124   1
   3  13   1 72.7158 23.7305  -2
  -3 -13   1 72.7158 23.7305   1
   3  13   0 60.3659 6.36189   1
   3  13   0 147.361 26.2034  -2
  -3 -13   0 147.361 26.2034   1
   3 -13   1 26.8568 6.11257   1
  -3 -13   1 48.7403 14.9018  -2
   3  13   1 48.7403 14.9018   1
   3  13   2 75.6301 7.36969   1
  -3 -13   2 83.6716 21.6800  -2
   3  13   2 83.6716 21.6800   1
   3 -13   3 171.004 8.99486   1
  -3 -13   3 237.853 26.2870  -2
   3  13   3 237.853 26.2870   1
  -3 -13  -4 3.94962 5.95243   1
  -3 -13   4-8.73054 18.0747  -2
   3  13   4-8.73054 18.0747   1
   3  13   5 60.6421 8.79515   1
  -3 -13   5 87.3547 22.7119  -2
   3  13   5 87.3547 22.7119   1
   3  13   6-1.78576 7.85488   1
  -3 -13   6 78.6488 22.5508  -2
   3  13   6 78.6488 22.5508   1
   3 -13   7 230.109 17.1398   1
  -3 -13   7 312.332 31.3837  -2
   3  13   7 312.332 31.3837   1
   3  13   8 7.70296 10.2960   1
  -3 -13   8 59.3588 25.1803  -2
   3  13   8 59.3588 25.1803   1
   3  13   9 149.015 16.9378   1
   3  13  -9 217.113 25.8038  -2
  -3 -13  -9 217.113 25.8038   1
   3 -13  10 16.2011 16.2925   1
   3  13 -10 37.6206 38.0714  -2
  -3 -13 -10 37.6206 38.0714   1
   3  13  11 67.0902 19.1717   1
   3  13 -11 0.19289 36.1460  -2
  -3 -13 -11 0.19289 36.1460   1
   3  14 -11 28.9974 24.8073   1
   3 -14  11 33.3609 26.1959  -2
  -3  14  11 33.3609 26.1959   1
   3  14 -10 5.08373 16.5999   1
   3 -14  10 1.97653 25.8538  -2
  -3  14  10 1.97653 25.8538   1
   3  14  -9 108.527 21.2445   1
   3 -14   9 112.632 19.6214  -2
  -3  14   9 112.632 19.6214   1
   3  14  -8 34.6964 17.4075   1
   3 -14   8 54.0841 17.6169  -2
  -3  14   8 54.0841 17.6169   1
   3  14  -7-1.08350 15.3812   1
   3 -14   7 10.6986 15.6965  -2
  -3  14   7 10.6986 15.6965   1
   3  14  -6 71.4384 12.9165   1
   3 -14   6 83.4210 17.3581  -2
  -3  14   6 83.4210 17.3581   1
   3  14  -5-1.73120 10.1729   1
   3 -14   5 33.1069 15.6886  -2
  -3  14   5 33.1069 15.6886   1
   3  14  -4 82.3751 13.6876   1
   3  14   4 86.5922 13.6424  -2
  -3 -14   4 86.5922 13.6424   1
   3  14  -3 96.1612 14.1409   1
   3  14   3 161.977 18.7974  -2
  -3 -14   3 161.977 18.7974   1
   3  14  -2 67.2060 8.85063   1
   3  14   2 69.2892 25.9713  -2
  -3 -14   2 69.2892 25.9713   1
   3  14  -1 147.812 11.9099   1
   3  14   1 246.406 18.9207  -2
  -3 -14   1 246.406 18.9207   1
   3  14   0 40.3167 12.2610   1
   3  14   0 85.4056 15.4739  -2
  -3 -14   0 85.4056 15.4739   1
   3 -14   1 189.900 11.0325   1
  -3 -14   1 202.887 19.4573  -2
   3  14   1 202.887 19.4573   1
   3  14   2 5.67173 6.73429   1
  -3 -14   2 14.2750 15.3480  -2
   3  14   2 14.2750 15.3480   1
   3  14   3 187.866 9.85154   1
  -3 -14   3 210.031 27.7078  -2
   3  14   3 210.031 27.7078   1
   3  14   4 22.6062 7.34981   1
   3  14  -4 39.8624 17.8372  -2
  -3 -14  -4 39.8624 17.8372   1
   3  14   5-1.04002 7.04007   1
  -3 -14   5-5.99659 17.4370  -2
   3  14   5-5.99659 17.4370   1
   3  14   6 41.4364 9.10189   1
  -3 -14   6 59.6242 15.0847  -2
   3  14   6 59.6242 15.0847   1
   3 -14   7 31.2270 15.0723   1
  -3 -14   7 11.1064 18.2474  -2
   3  14   7 11.1064 18.2474   1
   3 -14   8 59.4181 14.0746   1
  -3 -14   8 149.196 23.4848  -2
   3  14   8 149.196 23.4848   1
   3  14   9 29.3964 16.5289   1
   3  14  -9 35.8191 36.8926  -2
  -3 -14  -9 35.8191 36.8926   1
   3 -14  10 62.5767 24.4454   1
   3  15  -9 27.2031 19.4331   1
   3 -15   9 40.3953 26.4387  -2
  -3  15   9 40.3953 26.4387   1
  -3 -15   8 7.74786 16.5841   1
   3 -15   8 54.6646 26.3987  -2
  -3  15   8 54.6646 26.3987   1
   3  15  -7 101.569 19.7814   1
   3  15   7 115.969 19.4259  -2
  -3 -15   7 115.969 19.4259   1
   3  15  -6-1.53609 15.5772   1
   3 -15   6 14.4169 16.5940  -2
  -3  15   6 14.4169 16.5940   1
   3  15  -5 29.9478 12.6581   1
   3 -15   5 18.4118 16.8384  -2
  -3  15   5 18.4118 16.8384   1
  -3 -15   4 15.9131 11.9433   1
   3  15   4 50.2321 26.6253  -2
  -3 -15   4 50.2321 26.6253   1
   3  15  -3 38.9076 10.7028   1
   3  15   3 58.0234 27.0257  -2
  -3 -15   3 58.0234 27.0257   1
   3  15  -2 114.252 15.7022   1
  -3  15  -2 101.421 17.5935  -2
   3 -15  -2 101.421 17.5935   1
   3  15  -1 12.8334 11.7618   1
   3  15   1 9.35576 14.1397  -2
  -3 -15   1 9.35576 14.1397   1
   3  15   0 109.989 14.8761   1
  -3  15   0 157.029 18.5467  -2
   3 -15   0 157.029 18.5467   1
   3  15   1 19.8540 9.99832   1
   3  15  -1-0.01800 23.8514  -2
  -3 -15  -1-0.01800 23.8514   1
   3  15   2 40.8729 12.3753   1
  -3 -15   2 68.7370 13.6969  -2
   3  15   2 68.7370 13.6969   1
   3  15   3 35.4721 11.7486   1
  -3 -15   3 40.4583 13.2167  -2
   3  15   3 40.4583 13.2167   1
   3 -15   4 23.9876 9.15457   1
  -3 -15   4 26.5931 13.3963  -2
   3  15   4 26.5931 13.3963   1
   3  15   5 21.7629 9.40042   1
   3  15  -5 53.4272 14.0107  -2
  -3 -15  -5 53.4272 14.0107   1
   3  15   6-3.89359 11.2390   1
   3  15  -6-7.37718 12.9081  -2
  -3 -15  -6-7.37718 12.9081   1
   3  15   7 119.897 18.9187   1
  -3  15   7 141.303 19.5085  -2
   3 -15   7 141.303 19.5085   1
   3  15   8 48.7469 16.6733   1
  -3 -16   7 2.14053 21.0185   1
  -3 -16   6 65.9769 23.1620   1
   3 -16   6 64.2674 25.3462  -2
  -3  16   6 64.2674 25.3462   1
   3  16  -4 56.0115 16.7939   1
   3  16  -3 42.3840 14.0203   1
   3  16   3 104.498 28.4712  -2
  -3 -16   3 104.498 28.4712   1
   3  16  -2 33.9917 13.6052   1
   3  16   2 80.6478 26.9484  -2
  -3 -16   2 80.6478 26.9484   1
   3  16  -1 40.7598 13.9359   1
   3  16   1 98.1858 28.1654  -2
  -3 -16   1 98.1858 28.1654   1
   3  16   0 14.3568 12.4519   1
   3  16   0-0.03381 25.6535  -2
  -3 -16   0-0.03381 25.6535   1
   3 -16   1 67.8864 15.4982   1
   3  16  -1 76.2171 27.1857  -2
  -3 -16  -1 76.2171 27.1857   1
   3  16   2 4.99347 12.0098   1
  -3  16   2 33.7729 16.3574  -2
   3 -16   2 33.7729 16.3574   1
   3  16   3 31.0230 13.1917   1
  -3  16   3 46.7937 17.5821  -2
   3 -16   3 46.7937 17.5821   1
  -3  16   4 47.8231 17.4743  -2
   3 -16   4 47.8231 17.4743   1
  -3  16   5 1.27690 19.6398  -2
   3 -16   5 1.27690 19.6398   1
  -3  16   6 87.5844 22.1733  -2
   3 -16   6 87.5844 22.1733   1
   3 -16   7 19.0411 18.0158   1
  -3  16   7 4.19177 19.0504  -2
   3 -16   7 4.19177 19.0504   1
   3 -17  -2 23.6635 18.7695   1
   3 -17  -1 4.91385 17.8177   1
   3 -17   0 80.3983 20.3742   1
   3 -17   1 3.03367 17.0430   1
  -4   0  18 44.0471 14.4225   1
  -4   0  16 313.324 20.0730   1
  -4   0  14 194.543 16.0945   1
  -4   0  12 1511.57 31.7367   1
  -4   0  10 1414.47 18.1120   1
  -4   0   8 644.306 12.0629   1
   4   0  -6 308.338 15.2776   1
   4   0  -4 1765.56 14.8888   1
   4   0  -2 1611.28 11.3048   1
  -4   0   0 11146.9 25.5568   1
  -4   0  -2 2964.82 19.1244   1
   4   0   4 3332.37 17.6053   1
  -4   0  -6 6.98468 2.72265   1
  -4   0  -8 16.2452 2.63900   1
   4   0  10 495.461 10.7709   1
  -4   0 -12 981.652 27.6261   1
  -4   0 -14 374.422 20.3645   1
  -4   0 -16 713.116 27.8464   1
   4   0  18-10.1230 16.3110   1
  -4  -1  19 7.53553 16.1550   1
  -4  -1  18 266.827 15.4615   1
  -4  -1  17 6.99932 10.5069   1
  -4   1  16 454.713 18.5565   1
  -4  -1  15 13.9736 9.39288   1
  -4  -1  14 84.8895 11.1162   1
  -4   1  13 21.0698 6.62741   1
  -4  -1  12 208.425 9.96523   1
  -4  -1  11 21.4793 4.84241   1
   4   1 -10 913.984 9.66889   1
  -4   1   9 74.7951 3.86286   1
  -4  -1   8 190.345 5.91591   1
  -4  -1   7 57.6370 5.01221   1
  -4  -1   6 3079.21 19.1828   1
   4   1  -5 63.8611 3.98810   1
   4  -1  -4 1162.84 9.80302   1
  -4  -1   3 11.7718 1.58940   1
  -4   1   2 2765.70 10.0474   1
   4   1  -1 2.90633 1.12542   1
  -4  -1   0 343.670 3.45789   1
   4  -1   1 387.407 5.50117   1
   4   1   2 298.056 4.25350   1
   4  -1   3 197.125 3.78921   1
  -4   1  -4 319.350 5.08355   1
  -4   1  -5 32.2482 2.82621   1
  -4   1  -6 2890.79 17.2748   1
  -4   1  -7 2.94879 2.53893   1
  -4  -1  -8 493.719 6.89167   1
   4  -1   9 16.0880 2.01896   1
  -4  -1 -10 1400.27 13.4337   1
  -4  -1 -11 3.04674 6.62783   1
  -4  -1 -12 1.43555 7.03149   1
   4  -1  13-1.37376 7.47297   1
   4  -1  14 2.98367 7.77427   1
   4  -1  15-0.99709 7.32271   1
   4  -1  16 165.793 13.2595   1
   4   1  17 2.86177 9.50207   1
   4  -1  18 163.722 17.0051   1
   4  -1  19-14.4205 17.2313   1
  -4   2  19 25.0502 17.7333   1
  -4  -2  18 6.63270 10.3562   1
  -4   2  17 16.9887 8.62853   1
  -4   2  16 340.027 14.2162   1
  -4  -2  15 38.5119 8.47246   1
  -4   2  14 175.684 10.5839   1
  -4  -2  13 6.05698 5.56788   1
  -4  -2  12 1192.09 17.6192   1
  -4  -2  11 32.5973 4.81301   1
  -4  -2  10 840.107 12.5612   1
   4  -2  -9 3.57789 2.29000   1
   4  -2  -8 706.674 10.2278   1
  -4   2   7 99.8706 4.35965   1
   4  -2  -6 315.063 6.63693   1
  -4   2   5 226.588 3.65544   1
  -4  -2   4 1885.36 8.34460   1
   4  -2  -3 748.473 5.00872   1
  -4  -2   2 1091.91 6.80591   1
   4   2  -1 45.4950 1.98726   1
   4  -2   0 6537.44 15.1369   1
   4  -2   1 82.6279 2.44030   1
   4   2   2 1967.56 11.3426   1
   4   2   3 17.1329 1.87104   1
   4  -2   4 4729.56 17.3700   1
   4  -2   5 21.0605 2.69136   1
  -4  -2  -6 64.3156 3.94659   1
   4   2   7 424.606 6.06060   1
   4  -2   8 13.6009 2.47495   1
  -4  -2  -9 339.900 5.73197   1
  -4  -2 -10 376.236 7.27764   1
  -4  -2 -11 3.40107 5.88897   1
  -4   2 -12 1090.24 21.3325   1
  -4  -2 -13-7.86608 6.58162   1
  -4   2 -14 317.893 12.5727   1
   4  -2  15 7.29529 7.21589   1
   4   2  16 518.921 17.3952   1
   4   2  17 10.6185 8.87083   1
   4  -2  18-1.88960 18.1744   1
  -4   3  19-3.83279 18.7192   1
  -4  -3  18 175.829 15.0102   1
  -4   3  17-1.08641 9.30820   1
  -4  -3  16 308.694 13.4141   1
  -4  -3  15 5.64186 7.60029   1
  -4  -3  14 120.877 9.31273   1
  -4  -3  13 141.962 9.14619   1
  -4  -3  12 267.830 9.00955   1
  -4  -3  11 315.160 8.21466   1
   4  -3 -10 590.830 8.81506   1
   4  -3  -9 136.331 11.2138   1
   4  -3  -8 332.725 6.52326   1
  -4   3   7 7.78358 1.95983   1
  -4  -3   6 3532.99 13.3073   1
  -4  -3   5 3.18943 1.53133   1
   4   3  -4 655.089 5.43666   1
  -4  -3   3 549.551 4.82791   1
   4   3  -2 1656.89 8.16464   1
   4   3  -1 765.814 5.70508   1
   4  -3   0 181.876 3.36269   1
   4  -3   1 774.198 6.70945   1
   4   3   2 219.323 4.06550   1
   4  -3   3 542.462 7.71261   1
   4  -3   4 176.759 3.48608   1
  -4   3  -5 5.75591 2.27348   1
  -4  -3  -6 2490.47 14.4307   1
   4   3   7 57.6991 3.33773   1
   4   3   8 313.770 5.34276   1
  -4  -3  -9 46.5643 2.74676   1
  -4   3 -10 887.256 10.6473   1
  -4   3 -11 74.1068 7.67687   1
  -4  -3 -12 14.6674 6.42611   1
  -4  -3 -13 219.922 10.3691   1
   4  -3  14 20.7445 7.50535   1
   4   3  15 77.8958 8.84216   1
   4  -3  16 144.324 10.2647   1
   4  -3  17 15.4066 10.7149   1
   4  -3  18 117.446 25.1916   1
  -4   4  19 63.1315 35.6749   1
  -4   4  18-14.7854 16.3735   1
  -4   4  17 67.9284 12.3756   1
  -4  -4  16 244.533 13.8044   1
  -4  -4  15 259.826 13.2366   1
  -4   4  14 169.387 11.2572   1
  -4   4  13 3.43645 7.36083   1
  -4   4  12 948.324 15.7415   1
  -4  -4  11 13.1204 5.42136   1
  -4   4  10 293.938 5.81359   1
   4  -4  -9 110.148 3.58949   1
   4  -4  -8 220.201 5.61390   1
   4  -4  -7 326.241 6.17849   1
  -4  -4   6 90.9525 3.21735   1
  -4   4   5 587.692 5.63945   1
  -4  -4   4 776.931 6.91071   1
   4   4  -3 1159.19 7.98219   1
  -4   4   2 430.737 4.11617   1
   4   4  -1 20.6371 1.46688   1
   4   4   0 5735.85 19.6705   1
   4   4   1 181.954 3.77633   1
   4  -4   2 665.242 7.36181   1
  -4   4  -3 325.979 5.80792   1
   4   4   4 1864.06 12.4884   1
   4   4   5 573.206 6.61759   1
   4   4   6 62.6892 3.38281   1
   4  -4   7 712.258 8.83634   1
   4  -4   8 99.6509 4.72130   1
  -4  -4  -9 145.893 5.58561   1
  -4   4 -10 387.345 7.53414   1
   4  -4  11 18.3558 2.33128   1
  -4   4 -12 421.024 12.6177   1
   4  -4  13 2.96729 6.08947   1
  -4  -4 -14 118.968 9.04265   1
   4   4  15 34.5570 7.79386   1
  -4   4 -16 351.455 15.9093   1
  -4  -4 -17 15.7931 11.3619   1
  -4   5  18 64.2327 31.0840   1
  -4  -5  17-1.37358 10.4461   1
  -4  -5  16 137.856 11.7809   1
  -4   5  15 26.8009 8.83807   1
  -4  -5  14 11.1748 6.97958   1
  -4  -5  13 351.655 13.3828   1
  -4  -5  12 92.0322 8.52499   1
  -4   5  11 145.826 8.95305   1
  -4  -5  10 179.805 7.49389   1
   4  -5  -9 823.236 8.91852   1
   4  -5  -8 39.9966 3.28339   1
  -4   5   7 108.062 4.07150   1
  -4   5   6 1907.07 11.6192   1
  -4   5   5 34.4832 2.09154   1
  -4  -5   4 386.837 5.07986   1
   4  -5  -3 511.585 5.14011   1
  -4   5   2 987.359 6.18582   1
   4   5  -1 997.516 6.55012   1
   4   5   0 163.469 3.80538   1
  -4   5  -1 1701.65 10.7038   1
   4  -5   2 106.253 3.22161   1
   4   5   3 1616.08 13.6736   1
   4   5   4 118.705 5.73564   1
   4  -5   5 253.273 5.62672   1
  -4  -5  -6 1204.20 13.7564   1
   4   5   7 201.209 5.95444   1
  -4  -5  -8 181.122 5.83421   1
  -4   5  -9 142.821 5.71190   1
  -4  -5 -10 862.973 12.2829   1
  -4   5 -11 173.948 4.97561   1
   4   5  12 4.18121 5.96053   1
  -4   5 -13 688.555 15.5673   1
  -4   5 -14 13.6221 6.88127   1
   4  -5  15 169.414 11.9390   1
   4  -5  16 97.5272 11.3382   1
   4  -5  17 28.8319 13.4427   1
  -4   6  18-11.9854 23.2221   1
  -4  -6  17 75.3048 12.3939   1
  -4  -6  16 75.0423 11.7976   1
  -4  -6  15 238.555 12.8237   1
   4   6 -14 73.4836 8.31532   1
   4   6 -13 3.64093 6.50210   1
   4   6 -12 451.276 12.7241   1
   4   6 -11-2.04185 5.69885   1
  -4  -6  10 251.156 10.6360   1
   4  -6  -9 101.160 4.09719   1
   4  -6  -8 51.5400 3.22716   1
   4  -6  -7 843.117 8.46761   1
  -4  -6   6 46.1426 3.17046   1
  -4  -6   5 595.242 8.16253   1
  -4   6   4 435.499 6.83677   1
  -4   6   3 1416.96 9.94140   1
  -4   6   2 184.459 3.16415   1
   4   6  -1 93.9567 2.48527   1
   4   6   0 1751.45 9.02522   1
   4   6   1 157.783 4.30722   1
   4   6   2 345.747 6.44977   1
   4  -6   3 534.657 8.09615   1
   4   6   4 914.633 11.1984   1
   4   6   5 510.596 5.90407   1
  -4   6  -6 1.57724 2.75207   1
   4   6   7 1059.63 12.4900   1
   4   6   8 26.2564 4.08192   1
  -4  -6  -9 340.097 8.76284   1
   4   6  10 72.6200 6.82037   1
   4   6  11 35.9246 3.86115   1
  -4   6 -12 308.709 11.7255   1
   4   6  13 26.0522 6.59967   1
   4  -6  14 71.0764 9.88212   1
   4   6  15 65.3622 10.1926   1
   4   6  16 150.676 12.1662   1
  -4   6 -17 35.7137 15.8671   1
  -4   7  18 19.0264 27.3457   1
  -4   7  17-8.91383 10.4584   1
  -4  -7  16 34.9145 10.8481   1
  -4  -7  15 53.0158 9.40938   1
  -4   7  14 6.45599 7.76953   1
  -4  -7  13 578.931 14.5361   1
  -4   7  12 20.9361 6.95391   1
   4   7 -11 544.604 13.9697   1
  -4  -7  10 251.178 9.35522   1
   4   7  -9 922.925 10.9226   1
  -4   7   8 23.5364 2.95452   1
  -4  -7   7 8.49599 2.64347   1
   4   7  -6 454.908 6.83054   1
  -4   7   5 2.87461 2.48840   1
  -4  -7   4 116.632 5.05988   1
   4   7  -3 721.132 8.01500   1
   4  -7  -2 145.150 3.67744   1
   4   7  -1 1397.25 10.3334   1
  -4   7  -1 1832.88 17.1362  -2
   4  -7  -1 1832.88 17.1362   1
  -4  -7   0-1.69510 1.80371   1
  -4   7   0-12.7471 4.97578  -2
   4  -7   0-12.7471 4.97578   1
   4   7   1 1435.13 11.0208   1
  -4   7   1 1769.66 24.8047  -2
   4  -7   1 1769.66 24.8047   1
   4  -7   2 37.0795 3.31941   1
   4   7   3 1246.27 15.8276   1
   4  -7   4 70.3722 4.49846   1
   4   7   5 138.615 3.96385   1
   4   7   6 405.262 5.52819   1
   4   7   7 157.074 5.80232   1
   4   7   8 7.03850 3.78622   1
   4  -7   9 337.144 8.11906   1
  -4  -7 -10 238.802 9.37046   1
   4  -7  11 150.171 8.68337   1
   4   7  12 6.78816 8.60239   1
  -4   7 -13 374.956 16.6223   1
   4  -7  14 18.2559 8.54125   1
   4  -7  15 148.273 11.8848   1
   4   7  16 3.92932 9.18616   1
  -4   8  17 40.7186 12.1381   1
  -4  -8  16 66.3009 12.5191   1
  -4  -8  15 145.624 12.6261   1
  -4  -8  14-3.30433 7.69055   1
   4   8 -13 18.8484 7.29413   1
   4   8 -12 68.3596 8.08539   1
  -4   8  11 51.6509 6.89105   1
   4   8 -10 63.8816 6.34209   1
   4   8  -9 165.838 6.20389   1
  -4  -8   8 8.54468 3.40035   1
  -4   8   7 854.815 10.1012   1
   4   8  -6 3.91005 2.67745   1
   4   8  -5 683.272 10.2122   1
   4   8  -4 81.4280 5.40355   1
   4   8  -3 1485.44 13.5911   1
   4   8  -2 2.32166 2.71223   1
   4   8  -1 68.2481 2.98370   1
  -4   8  -1 124.358 9.86169  -2
   4  -8  -1 124.358 9.86169   1
   4  -8   0 593.032 6.78235   1
  -4  -8   0 730.029 11.3510  -2
   4   8   0 730.029 11.3510   1
   4  -8   1 246.958 5.13495   1
  -4  -8   1 218.993 7.77942  -2
   4   8   1 218.993 7.77942   1
   4   8   2 34.3688 3.63603   1
   4   8   3 451.649 7.99822   1
   4  -8   4 264.303 6.70325   1
   4   8   5 359.076 6.64136   1
   4  -8   6 6.49342 2.67686   1
   4   8   7 809.033 11.7596   1
   4   8   8 9.51778 4.41542   1
   4   8   9 668.279 14.0033   1
   4  -8  10 51.8868 5.23663   1
   4  -8  11 149.463 8.74648   1
  -4  -8 -12 48.9265 8.62864   1
   4   8  13 32.6005 9.44891   1
  -4  -8 -14 14.8430 9.00305   1
   4  -8  15 81.2231 10.5045   1
  -4   8 -16 38.5418 12.1704   1
  -4  -9  16 4.14595 10.6340   1
  -4  -9  15 92.4040 12.9521   1
  -4   9  14 11.1156 10.9624   1
   4  -9  14-28.9521 26.0357  -2
  -4   9  14-28.9521 26.0357   1
  -4  -9  13 405.900 13.6110   1
   4  -9  13 425.146 40.4040  -2
  -4   9  13 425.146 40.4040   1
  -4   9  12 6.04583 6.37105   1
   4   9 -11 201.005 9.55068   1
   4  -9  11 246.840 29.7902  -2
  -4   9  11 246.840 29.7902   1
   4   9 -10 38.6083 5.99624   1
   4   9  -9 569.970 11.4563   1
  -4   9   8 1.37292 4.03860   1
   4   9  -7 3.72938 3.74943   1
  -4   9   6 124.521 5.24262   1
   4   9  -5 24.3427 3.88041   1
   4   9  -4 5.61524 3.63557   1
   4   9  -3 451.871 9.65970   1
   4   9  -2 23.6389 3.35026   1
   4   9  -1 813.372 7.57720   1
   4   9   0 0.44770 2.38995   1
  -4   9   0-0.71819 5.21707  -2
   4  -9   0-0.71819 5.21707   1
   4  -9   1 1149.10 8.73584   1
  -4  -9   1 1287.45 14.1771  -2
   4   9   1 1287.45 14.1771   1
   4   9   2 6.17618 2.76425   1
  -4  -9   2 3.65085 5.51995  -2
   4   9   2 3.65085 5.51995   1
   4  -9   3 1242.33 12.1111   1
  -4  -9  -4 5.83276 3.96202   1
   4   9   5 102.690 4.57467   1
   4   9   6 105.898 4.91181   1
   4   9   7 88.8031 4.32637   1
   4  -9   8 1.06259 5.77761   1
  -4  -9  -9 305.322 10.3056   1
   4   9  10 20.1920 6.33627   1
  -4   9 -11 176.514 9.28337   1
   4  -9  12 6.37243 7.09329   1
   4  -9  13 373.645 14.8567   1
  -4  -9 -14 26.5529 9.65368   1
  -4  -9 -15 79.5935 13.2985   1
  -4   9 -16 6.05579 11.0431   1
  -4  10  16 8.07860 12.2210   1
  -4  10  15 210.518 20.8141   1
  -4  10  14 7.96288 14.7318   1
   4 -10  14-34.6018 25.5266  -2
  -4  10  14-34.6018 25.5266   1
  -4  10  13 11.0522 9.28792   1
   4 -10  13 18.5413 26.3046  -2
  -4  10  13 18.5413 26.3046   1
  -4  10  12 13.3887 6.55907   1
   4  10 -11 4.10666 5.93080   1
  -4 -10  10 9.90255 5.73618   1
  -4  10   9 176.286 7.54034   1
   4  10  -8 10.2217 4.29776   1
  -4  10   7 645.898 13.9837   1
  -4  10   6 27.1705 6.28308   1
   4 -10  -5 511.962 10.1524   1
   4  10  -4 75.8228 5.60733   1
  -4  10   3 977.344 10.8252   1
   4  10  -2 20.6219 3.84622   1
   4  10  -1 38.2120 3.96980   1
   4  10   0 21.3130 3.83753   1
  -4  10   0 12.7473 7.43180  -2
   4 -10   0 12.7473 7.43180   1
   4  10   1 55.0006 3.53163   1
  -4 -10   1 54.9978 5.78294  -2
   4  10   1 54.9978 5.78294   1
   4  10   2 22.7379 2.27465   1
   4  10   3 504.592 7.44900   1
   4  10   4 7.77884 3.47061   1
   4  10   5 227.859 8.60401   1
   4  10   6 23.6808 6.60050   1
  -4 -10  -7 563.553 16.8834   1
   4 -10   8 5.52160 7.78492   1
   4  10   9 296.273 14.0075   1
   4  10  10 12.5124 6.28089   1
   4  10  11 66.2582 8.31326   1
  -4 -10  11 18.6267 30.2883  -2
   4  10  11 18.6267 30.2883   1
   4 -10  12 3.51907 7.68141   1
   4  10  13 21.9770 10.5176   1
  -4  10 -14-3.06842 14.2563   1
  -4  10 -15 33.4217 16.5440   1
   4 -11  14 28.6180 25.6562  -2
  -4  11  14 28.6180 25.6562   1
  -4 -11  13 323.227 22.2234   1
   4 -11  13 359.557 36.9484  -2
  -4  11  13 359.557 36.9484   1
  -4 -11  12 3.44670 10.2742   1
   4 -11  12 42.4156 23.7267  -2
  -4  11  12 42.4156 23.7267   1
   4  11 -11 139.167 13.3180   1
   4 -11  11 175.897 26.7647  -2
  -4  11  11 175.897 26.7647   1
  -4  11  10 2.52260 9.01369   1
   4 -11  10 24.2620 20.0113  -2
  -4  11  10 24.2620 20.0113   1
  -4 -11   9 447.779 17.0881   1
   4 -11   9 480.067 30.2995  -2
  -4  11   9 480.067 30.2995   1
  -4 -11   8 37.6664 9.74372   1
   4 -11   8 53.6487 18.0036  -2
  -4  11   8 53.6487 18.0036   1
   4  11  -7 6.67559 6.48008   1
   4  11  -6 4.97104 6.40767   1
  -4  11   5 8.35849 6.16323   1
   4  11  -4 8.46388 5.97394   1
   4  11  -3 395.813 10.4473   1
   4 -11  -2 0.40504 4.34697   1
   4  11  -1 488.911 10.1257   1
   4 -11   0 17.1346 4.59166   1
  -4 -11   0 25.9587 7.29191  -2
   4  11   0 25.9587 7.29191   1
   4  11   1 530.658 10.3793   1
  -4 -11   1 669.032 11.9951  -2
   4  11   1 669.032 11.9951   1
   4 -11   2 5.45263 2.72859   1
   4  11   3 632.862 10.4052   1
   4 -11   4 28.2841 6.51530   1
   4 -11   5 73.6829 7.68358   1
   4 -11   6-6.01390 6.23553   1
   4 -11   7 63.5652 10.1343   1
   4  11   8 10.8186 8.09985   1
   4  11   9 120.889 11.4279   1
   4  11  10 7.06287 10.3361   1
  -4 -11  10-11.5975 25.3437  -2
   4  11  10-11.5975 25.3437   1
   4  11  11 47.5538 11.4631   1
  -4 -11  11 46.5835 31.6888  -2
   4  11  11 46.5835 31.6888   1
   4 -11  12-8.49794 9.43126   1
   4  11  13 308.745 30.2425   1
   4 -12  13-14.1301 23.8041  -2
  -4  12  13-14.1301 23.8041   1
   4  12 -12 0.06096 14.8731   1
   4 -12  12-0.02070 23.1575  -2
  -4  12  12-0.02070 23.1575   1
   4  12 -11 14.3842 16.7524   1
   4 -12  11 76.9733 23.6929  -2
  -4  12  11 76.9733 23.6929   1
   4  12 -10 14.1717 15.5041   1
   4 -12  10 67.3101 22.1636  -2
  -4  12  10 67.3101 22.1636   1
   4  12  -9 69.8718 18.3009   1
   4 -12   9 149.579 23.5755  -2
  -4  12   9 149.579 23.5755   1
   4  12  -8 40.4288 16.1884   1
   4 -12   8 34.6605 20.2459  -2
  -4  12   8 34.6605 20.2459   1
  -4 -12   7 268.065 16.4431   1
   4 -12   7 284.320 26.0707  -2
  -4  12   7 284.320 26.0707   1
   4  12  -6 12.1176 10.0528   1
   4 -12   6 3.61469 17.0802  -2
  -4  12   6 3.61469 17.0802   1
   4  12  -5 240.058 13.3668   1
   4 -12   5 145.672 20.9297  -2
  -4  12   5 145.672 20.9297   1
   4  12  -4-2.28837 5.57915   1
   4  12  -3 479.214 14.7313   1
   4  12  -2 13.2264 5.10548   1
   4  12  -1 5.79081 4.93544   1
   4 -12   0 14.8664 4.87634   1
   4  12   1 56.8860 6.16551   1
   4 -12   2 85.8057 6.73805   1
   4 -12   3 142.011 7.85234   1
   4 -12   4 32.4586 7.08646   1
   4  12   5 136.013 9.16286   1
   4 -12   6 27.4302 7.65351   1
   4 -12   7 365.390 16.4106   1
   4  12   8 10.0704 10.3607   1
  -4 -12   8 64.5572 25.3575  -2
   4  12   8 64.5572 25.3575   1
   4  12   9 192.839 15.4599   1
  -4 -12   9 233.072 33.2805  -2
   4  12   9 233.072 33.2805   1
   4  12  10 17.8490 10.0469   1
   4  12  11 44.9917 13.0447   1
   4  12  12 6.28461 27.5112   1
  -4  13  13 129.844 26.6742   1
   4  13 -12-15.7790 19.8491   1
   4 -13  12 111.276 26.4432  -2
  -4  13  12 111.276 26.4432   1
   4  13 -11 43.6476 18.1132   1
   4 -13  11 80.3791 24.2408  -2
  -4  13  11 80.3791 24.2408   1
   4  13 -10-9.30930 15.4463   1
   4 -13  10 9.81254 22.7935  -2
  -4  13  10 9.81254 22.7935   1
   4  13  -9 187.966 23.1539   1
   4 -13   9 193.975 27.7759  -2
  -4  13   9 193.975 27.7759   1
   4  13  -8 32.6324 16.6866   1
   4 -13   8 88.0931 23.3985  -2
  -4  13   8 88.0931 23.3985   1
   4  13  -7-7.30590 14.1121   1
   4 -13   7 45.5407 20.8182  -2
  -4  13   7 45.5407 20.8182   1
   4  13  -6 87.1721 11.2125   1
   4 -13   6 76.6820 20.8956  -2
  -4  13   6 76.6820 20.8956   1
   4  13  -5 4.70110 9.08300   1
   4 -13   5 43.2864 19.2198  -2
  -4  13   5 43.2864 19.2198   1
  -4 -13   4 118.628 11.9875   1
   4 -13  -3 155.538 9.90839   1
   4 -13  -2 17.7432 6.44999   1
   4  13  -1 173.437 9.40888   1
   4  13   0-2.94366 4.86481   1
   4 -13   1 258.521 9.42113   1
   4  13   2 1.30795 5.37641   1
   4 -13   3 311.573 10.3763   1
   4  13   4 3.02541 5.77899   1
   4  13   5 29.2763 7.61052   1
   4  13   6 27.7452 7.56843   1
   4  13   7 9.53293 9.33639   1
   4  13   8 43.8259 11.9535   1
  -4 -13   8 140.434 28.2654  -2
   4  13   8 140.434 28.2654   1
   4  13   9 56.5808 12.7250   1
  -4 -13   9 177.167 31.7033  -2
   4  13   9 177.167 31.7033   1
   4  13  10 17.6103 11.9960   1
   4  14 -11 12.7246 22.8356   1
   4 -14  11 14.5757 25.1285  -2
  -4  14  11 14.5757 25.1285   1
   4  14 -10 5.38186 22.9317   1
   4 -14  10 57.0280 25.5224  -2
  -4  14  10 57.0280 25.5224   1
   4  14  -9 62.8040 18.9827   1
   4 -14   9 114.494 26.5455  -2
  -4  14   9 114.494 26.5455   1
   4  14  -8 14.7478 13.0313   1
   4 -14   8 21.8419 22.3859  -2
  -4  14   8 21.8419 22.3859   1
  -4 -14   7 136.644 16.5490   1
   4 -14   7 174.763 26.9386  -2
  -4  14   7 174.763 26.9386   1
   4  14  -6 6.80872 9.62310   1
   4 -14   6 64.5686 22.2754  -2
  -4  14   6 64.5686 22.2754   1
   4  14  -5 41.3357 10.6906   1
   4  14  -4 1.69793 9.57699   1
   4  14  -3 145.495 11.7208   1
   4  14  -2 18.6371 8.22721   1
   4  14  -1 18.7878 8.33099   1
   4 -14   0 97.3251 10.6104   1
   4 -14   1 13.6645 7.88022   1
  -4 -14   1 37.2342 21.0302  -2
   4  14   1 37.2342 21.0302   1
   4 -14   2 99.1946 7.99658   1
   4  14   3 99.0914 8.16896   1
   4  14   4 25.9484 7.30917   1
  -4 -14   4 4.82689 21.1035  -2
   4  14   4 4.82689 21.1035   1
   4  14   5 24.4586 6.72945   1
   4  14   6 2.55130 7.00385   1
  -4 -14   6 12.3390 23.1359  -2
   4  14   6 12.3390 23.1359   1
   4  14   7 169.566 19.2087   1
  -4 -14   7 212.818 24.3208  -2
   4  14   7 212.818 24.3208   1
   4  14   8 22.5333 12.0381   1
  -4 -14   8 80.3356 26.4504  -2
   4  14   8 80.3356 26.4504   1
   4  14   9 101.522 17.9683   1
   4 -15   9 64.5986 26.1643  -2
  -4  15   9 64.5986 26.1643   1
  -4 -15   8-9.52085 22.8930   1
   4 -15   8 40.4236 24.6103  -2
  -4  15   8 40.4236 24.6103   1
   4  15  -7-5.98064 16.5905   1
   4 -15   7 54.6768 24.3199  -2
  -4  15   7 54.6768 24.3199   1
   4  15  -6 52.3581 13.8290   1
   4  15  -5 1.22770 10.5104   1
   4 -15  -4 55.0921 10.4276   1
   4  15  -3 57.6351 10.0804   1
   4  15  -2 65.9330 12.3153   1
   4  15  -1 85.1253 12.7910   1
  -4 -15   0 18.2261 11.3389   1
   4  15   1 69.3847 11.8396   1
   4  15   2-0.67630 8.76921   1
   4  15   3 62.7001 14.1135   1
  -4 -15   3 94.4452 20.2999  -2
   4  15   3 94.4452 20.2999   1
   4  15   4 15.6745 7.34389   1
   4  15  -4 5.12187 30.3351  -2
  -4 -15  -4 5.12187 30.3351   1
   4  15   5 6.50988 7.92943   1
  -4 -15   5 39.9953 19.2845  -2
   4  15   5 39.9953 19.2845   1
   4  15   6 51.6095 9.55216   1
   4  15  -6 123.716 36.0786  -2
  -4 -15  -6 123.716 36.0786   1
   4  15   7 32.9173 10.7953   1
   4  15   8 32.0075 15.8065   1
  -4 -16   6-18.7200 19.4513   1
   4  16  -4 25.5329 14.4414   1
   4  16  -3 59.0036 16.9230   1
   4 -16  -2 38.5511 16.4491   1
   4 -16  -1-2.56068 14.1465   1
   4 -16   0 103.269 18.3655   1
   4 -16   1 7.77462 13.9206   1
   4 -16   2 67.3023 19.8095   1
   4 -16   3 4.69092 17.2247   1
   4 -16   4 26.4560 17.6931   1
  -5   0  18 144.871 25.7882   1
  -5   0  16 291.818 20.0844   1
  -5   0  14 101.090 13.8472   1
  -5   0  12 201.027 14.4619   1
  -5   0  10 286.274 9.50279   1
  -5   0   8 224.344 11.7514   1
  -5   0   6 5497.28 39.8693   1
  -5   0   4 1223.49 9.67788   1
   5   0  -2 1437.78 12.0085   1
   5   0   0 436.374 5.63041   1
  -5   0  -2 24.4171 2.87087   1
   5   0   4 710.225 11.7215   1
   5   0   6 3918.84 28.4968   1
   5   0   8 638.151 11.0137   1
  -5   0 -10 1378.31 21.2786   1
  -5   0 -12 19.7807 10.1677   1
  -5   0 -14 48.7369 12.4023   1
   5   0  16 134.856 16.1478   1
   5   0  18 215.809 26.8776   1
  -5  -1  19 1.49935 16.5343   1
  -5   1  18 43.6759 14.7137   1
  -5   1  17 8.86158 9.47815   1
  -5  -1  16 162.013 12.8560   1
  -5  -1  15 1.67090 9.23696   1
  -5  -1  14 178.238 12.5915   1
  -5  -1  13 5.95907 6.79551   1
  -5  -1  12 1503.11 23.6616   1
  -5   1  11 1.33009 6.20247   1
  -5   1  10 668.632 9.85380   1
  -5  -1   9 0.21999 3.79141   1
  -5  -1   8 549.943 13.4076   1
  -5  -1   7 55.3219 5.67900   1
   5  -1  -6 320.725 6.52071   1
  -5  -1   5 125.433 3.87333   1
  -5  -1   4 435.234 4.29936   1
   5  -1  -3 160.700 2.98496   1
  -5  -1   2 307.903 4.37168   1
  -5   1   1 10.5087 1.58249   1
   5   1   0 5952.84 15.0641   1
   5  -1   1 9.59567 1.64141   1
   5   1   2 924.111 7.88833   1
   5  -1   3 26.1508 2.16722   1
  -5   1  -4 2615.30 14.5318   1
  -5   1  -5 49.4079 3.70325   1
  -5  -1  -6 215.399 6.59891   1
  -5  -1  -7 23.8709 3.48343   1
  -5  -1  -8 17.9459 3.38250   1
  -5  -1  -9 24.6736 2.52660   1
   5   1  10 338.548 15.2433   1
  -5  -1 -11 36.5852 8.37852   1
   5  -1  12 963.650 21.7497   1
  -5  -1 -13-2.55148 7.60074   1
  -5  -1 -14 283.110 14.5660   1
   5  -1  15 2.59021 8.58444   1
   5  -1  16 475.234 18.6376   1
   5   1  17 13.0498 10.0161   1
   5  -1  18 4.88223 12.2650   1
  -5   2  19-9.54574 16.4054   1
  -5   2  18 247.313 20.2004   1
  -5   2  17 5.71044 9.33110   1
  -5  -2  16 369.247 14.6882   1
  -5   2  15 0.82628 7.53266   1
  -5  -2  14 42.5804 8.26635   1
  -5   2  13 209.777 9.29323   1
  -5  -2  12 159.644 8.35181   1
  -5  -2  11 80.7896 6.79166   1
  -5  -2  10 214.027 8.89916   1
   5  -2  -9 97.2113 5.31378   1
  -5  -2   8 268.163 6.35039   1
  -5   2   7 12.0704 2.81750   1
   5  -2  -6 3382.10 16.2273   1
  -5  -2   5 5.45552 1.74020   1
  -5  -2   4 1385.57 7.71384   1
  -5  -2   3 215.067 3.95019   1
  -5  -2   2 2409.39 11.3963   1
  -5   2   1 321.093 4.88704   1
   5  -2   0 185.461 2.81787   1
   5   2   1 52.6078 2.21484   1
   5   2   2 437.638 5.37215   1
   5  -2   3 176.319 4.15166   1
   5  -2   4 594.384 8.04597   1
  -5  -2  -5 58.0258 3.40868   1
   5  -2   6 2897.02 21.4200   1
  -5  -2  -7 10.4235 3.25611   1
   5   2   8 340.187 5.92695   1
   5  -2   9 30.7910 2.72744   1
  -5   2 -10 1134.54 11.0711   1
  -5   2 -11 13.0405 4.16027   1
   5  -2  12 32.7450 6.95759   1
  -5   2 -13 62.5834 8.47588   1
   5   2  14 39.2334 8.34840   1
   5  -2  15 6.00509 7.22229   1
   5  -2  16 100.507 10.5070   1
   5   2  17 3.10042 8.71967   1
   5  -2  18 73.8770 23.0992   1
  -5   3  18 24.5124 16.7800   1
  -5  -3  17 34.7609 10.4165   1
  -5   3  16 175.419 12.7624   1
  -5  -3  15 93.0296 9.62224   1
  -5  -3  14 69.1818 8.62753   1
  -5   3  13-1.89304 6.48417   1
  -5   3  12 987.118 17.3049   1
  -5   3  11 0.10146 5.38155   1
   5  -3 -10 747.040 11.6136   1
  -5  -3   9 33.4338 3.15581   1
   5  -3  -8 319.453 5.40828   1
   5  -3  -7 173.318 4.08045   1
  -5  -3   6 136.256 4.87702   1
  -5  -3   5 132.478 2.82487   1
  -5   3   4 448.910 4.92984   1
   5  -3  -3 827.890 7.61904   1
  -5  -3   2 126.032 4.63663   1
   5  -3  -1 165.011 3.15407   1
   5  -3   0 3560.80 12.7316   1
   5   3   1 83.5507 2.77465   1
  -5  -3  -2 1034.54 9.52223   1
   5  -3   3 192.826 4.40513   1
   5   3   4 2360.33 16.1206   1
   5   3   5 341.374 5.86074   1
  -5   3  -6 90.0239 4.75037   1
   5   3   7 410.370 7.09881   1
   5  -3   8 1.13711 2.60054   1
   5   3   9 167.231 4.47003   1
   5   3  10 256.511 5.26761   1
   5   3  11 40.2510 3.63106   1
   5   3  12 696.497 17.5968   1
  -5   3 -13 27.9810 7.77727   1
  -5   3 -14 177.594 11.6583   1
   5   3  15 29.7064 8.02601   1
   5  -3  16 219.652 11.8679   1
   5  -3  17 10.0191 19.8906   1
  -5   4  18 101.449 22.6860   1
  -5  -4  17 5.98581 9.66155   1
  -5   4  16 187.418 12.7493   1
  -5   4  15 16.8901 8.72420   1
  -5  -4  14 63.9150 9.25485   1
  -5   4  13 108.184 9.84944   1
  -5  -4  12 124.996 8.22895   1
  -5   4  11 161.052 8.46074   1
  -5  -4  10 314.992 7.05402   1
   5  -4  -9 912.448 11.7840   1
  -5   4   8 49.7909 4.11654   1
  -5  -4   7 111.351 4.59255   1
  -5   4   6 2131.38 12.7203   1
  -5   4   5 36.6267 2.81459   1
   5   4  -4 1261.29 8.97712   1
   5  -4  -3 223.179 4.20529   1
  -5   4   2 1281.96 8.23807   1
   5   4  -1 431.868 5.09711   1
   5  -4   0 115.582 3.02632   1
   5   4   1 727.723 6.60048   1
   5   4   2 108.148 3.64296   1
   5  -4   3 1097.85 10.5046   1
   5  -4   4 169.668 4.92082   1
   5  -4   5 212.629 4.66575   1
  -5   4  -6 1427.46 15.5237   1
   5   4   7 168.421 5.84810   1
   5   4   8 453.879 8.68602   1
   5  -4   9 197.096 5.60382   1
   5  -4  10 1139.19 10.8974   1
   5   4  11 74.9479 4.66833   1
  -5   4 -12 35.0421 7.53529   1
  -5   4 -13 194.742 11.2936   1
   5  -4  14 32.2118 7.87070   1
   5   4  15 76.7887 9.21226   1
   5  -4  16 56.9945 10.8838   1
   5  -4  17 48.2813 23.2253   1
  -5  -5  17 73.2056 12.3777   1
  -5   5  16 143.499 12.0955   1
  -5  -5  15 193.059 12.3793   1
  -5  -5  14 85.1771 9.64413   1
  -5   5  13 24.9129 7.87156   1
  -5  -5  12 513.398 12.8249   1
  -5   5  11-6.77761 5.38143   1
  -5   5  10 308.462 8.89058   1
  -5   5   9 299.026 6.72757   1
   5  -5  -8 190.254 5.74624   1
   5  -5  -7 754.981 9.09010   1
  -5  -5   6 51.2143 3.04207   1
  -5  -5   5 372.382 5.95623   1
  -5   5   4 530.438 6.54710   1
   5   5  -3 759.483 6.26574   1
   5   5  -2 92.0778 2.79706   1
   5   5  -1 58.3019 2.05512   1
   5  -5   0 1781.14 11.6604   1
   5  -5   1 29.2610 2.40163   1
   5   5   2 375.972 5.91789   1
   5   5   3 818.478 9.82203   1
   5   5   4 781.925 11.1449   1
   5   5   5 184.487 4.28770   1
   5  -5   6 9.84962 3.68400   1
   5   5   7 598.748 12.1788   1
   5  -5   8 7.78279 4.59608   1
   5   5   9 643.638 10.6785   1
   5   5  10 64.9776 5.08310   1
   5   5  11 33.8202 4.39647   1
  -5  -5 -12 207.291 10.3340   1
   5  -5  13 7.45972 6.47495   1
   5  -5  14 61.6454 8.23407   1
   5  -5  15 28.6072 9.28213   1
   5  -5  16 228.656 14.4156   1
  -5   6  17 0.40685 11.3526   1
  -5   6  16 98.5022 11.2477   1
  -5   6  15 10.6461 8.61033   1
  -5   6  14 15.8715 7.42793   1
   5   6 -13 245.262 11.1039   1
  -5   6  12 44.9562 7.77720   1
  -5   6  11 246.534 11.5235   1
  -5   6  10 238.328 9.56448   1
  -5   6   9 971.425 11.9925   1
   5  -6  -8 131.200 4.67551   1
  -5   6   7 167.304 5.20309   1
  -5   6   6 910.051 10.5299   1
  -5   6   5 113.479 4.49594   1
  -5   6   4 132.745 4.26506   1
  -5   6   3 384.732 4.25440   1
   5   6  -2 619.449 5.53203   1
   5  -6  -1 617.531 5.63503   1
   5  -6   0 71.3653 2.74637   1
   5  -6   1 1290.33 12.1792   1
   5   6   2 26.8833 3.32201   1
   5  -6   3 1420.01 12.1630   1
   5   6   4 24.1624 4.69017   1
   5   6   5 120.664 6.28891   1
   5   6   6 1058.70 16.8405   1
   5   6   7 159.886 5.98298   1
   5  -6   8 299.896 7.68951   1
   5   6   9 104.323 6.62024   1
   5   6  10 458.305 13.9093   1
   5   6  11 59.8479 5.28031   1
  -5   6 -12 3.07346 6.54933   1
   5   6  13 320.999 11.8840   1
   5  -6  14 2.43883 8.48227   1
   5  -6  15 180.489 12.7429   1
   5  -6  16 14.9044 10.1807   1
  -5   7  16 57.7041 11.4241   1
  -5   7  15 254.656 13.2009   1
   5   7 -14 29.0762 7.92286   1
  -5   7  13 17.6891 6.92420   1
  -5  -7  12 60.7798 8.12681   1
  -5  -7  11-5.03437 6.41545   1
  -5   7  10 46.0562 7.09145   1
  -5   7   9 167.574 6.87924   1
  -5   7   8 116.031 5.26037   1
  -5   7   7 402.639 8.36982   1
  -5   7   6 43.9807 3.68396   1
  -5   7   5 432.071 7.62592   1
  -5   7   4 128.290 4.08566   1
  -5   7   3 1450.55 9.05592   1
  -5   7   2 38.1959 2.47757   1
   5  -7  -1 80.2313 2.82011   1
  -5   7   0 709.489 6.52307   1
   5   7   1 127.061 3.88990   1
   5   7   2 32.1610 3.60501   1
   5   7   3 274.596 8.52696   1
   5   7   4 494.179 16.0445   1
   5   7   5 462.712 10.5584   1
   5   7   6-1.62985 4.46993   1
   5   7   7 1226.28 17.3602   1
   5  -7   8 1.11038 4.16375   1
   5  -7   9 671.709 12.9057   1
  -5  -7 -10 11.5415 5.67628   1
   5  -7  11 121.139 8.15564   1
  -5  -7 -12 63.1223 10.3174   1
  -5  -7 -13 18.9828 9.27697   1
   5  -7  14 26.7228 8.85062   1
   5  -7  15 81.6446 10.8697   1
  -5  -7 -16 96.1605 13.7228   1
  -5   8  16 30.9331 12.0750   1
  -5  -8  15 48.0026 10.7150   1
  -5   8  14-5.31853 7.74864   1
   5   8 -13 429.352 14.1720   1
  -5   8  12-3.90294 6.71956   1
   5   8 -11 234.633 10.1249   1
  -5  -8  10 193.897 9.04647   1
   5   8  -9 862.172 12.7557   1
   5   8  -8 20.7966 4.48683   1
   5   8  -7 49.4686 4.61079   1
  -5   8   6 239.628 8.06596   1
   5   8  -5 33.6969 4.06287   1
   5   8  -4 26.3335 3.60328   1
   5   8  -3 376.022 5.33646   1
   5   8  -2 117.698 3.84501   1
   5   8  -1 716.591 6.66576   1
   5  -8   0-1.95251 1.99226   1
   5  -8   1 893.832 8.95987   1
   5   8   2 15.9904 3.54963   1
   5   8   3 1326.07 17.6101   1
   5  -8   4 9.32921 4.54238   1
   5   8   5 90.7689 4.69908   1
  -5  -8  -6 105.501 3.81933   1
   5   8   7 19.1026 5.41646   1
   5  -8   8-0.01773 5.68364   1
   5   8   9 161.184 9.33416   1
  -5   8 -10 169.289 8.93897   1
   5  -8  11 38.4351 7.01722   1
   5  -8  12 5.51150 8.01837   1
  -5  -8 -13 316.568 15.9117   1
  -5   8 -14 10.1821 9.63196   1
  -5   8 -15 100.690 13.8676   1
   5   8  16 2.18575 21.3454   1
  -5   9  16 13.7212 20.5863   1
  -5   9  15 227.697 15.3105   1
  -5   9  14-5.05419 8.48222   1
   5   9 -13 5.06795 7.28419   1
   5   9 -12 18.1479 7.03926   1
  -5  -9  11 1.80592 6.29071   1
   5   9 -10 1.06886 5.55567   1
  -5   9   9 164.869 8.06617   1
   5   9  -8 5.06595 4.54837   1
   5   9  -7 726.415 13.1660   1
   5   9  -6 0.99371 4.73184   1
   5   9  -5 506.137 11.0787   1
   5   9  -4 91.9717 6.10416   1
   5   9  -3 1035.68 13.0237   1
   5   9  -2 3.45320 3.14457   1
   5  -9  -1 60.3649 3.61970   1
  -5  -9   0 61.0918 10.8158  -2
   5   9  -1 61.0918 10.8158   1
   5   9   0 84.0999 3.98641   1
  -5  -9   1 80.0182 10.4131  -2
   5   9   0 80.0182 10.4131   1
  -5   9   0 68.7764 10.4478  -2
   5  -9   0 68.7764 10.4478   1
   5   9   1 63.0806 3.25159   1
  -5   9   1 54.4984 10.2309  -2
   5  -9   1 54.4984 10.2309   1
   5   9   2 5.90395 3.16354   1
  -5   9   2 5.68678 9.05116  -2
   5  -9   2 5.68678 9.05116   1
   5   9   3 383.098 8.73979   1
   5   9   4 34.3981 5.16638   1
   5   9   5 213.060 6.36894   1
   5   9   6 8.54177 5.09922   1
   5  -9   7 657.703 14.4913   1
   5   9   8 7.50759 7.80130   1
  -5  -9  -9 530.148 17.3243   1
   5   9  10 4.72980 7.90238   1
   5   9  11 166.568 9.58128   1
   5  -9  12 6.83441 7.83643   1
   5  -9  13 53.6631 9.40978   1
  -5   9 -14-0.47031 9.62339   1
  -5  -9 -15 31.9605 11.8047   1
  -5  10  15 22.0807 19.5068   1
  -5  10  14 6.61966 12.6326   1
   5  10 -13 249.426 13.3596   1
   5  10 -12 0.59927 7.83253   1
   5  10 -11 154.092 8.79457   1
  -5  10  10 22.1694 6.10026   1
  -5  10   9 586.336 14.3941   1
   5  10  -8 1.58336 5.90184   1
   5  10  -7 48.1881 6.78530   1
   5  10  -6 21.9575 6.09689   1
   5  10  -5 20.7391 4.24417   1
   5  10  -4 3.49074 3.92679   1
   5 -10  -3 251.959 8.10770   1
   5  10  -2 27.4316 4.20001   1
   5  10  -1 365.605 7.92590   1
  -5 -10   0 334.218 15.6800  -2
   5  10  -1 334.218 15.6800   1
   5 -10   0 11.3656 4.60501   1
  -5 -10   1 148.294 8.45818  -2
   5  10   0 148.294 8.45818   1
  -5  10   0 15.9234 9.42158  -2
   5 -10   0 15.9234 9.42158   1
   5  10   1 689.073 9.20574   1
  -5 -10   2 706.310 17.1379  -2
   5  10   1 706.310 17.1379   1
   5  10   2 0.40894 2.55960   1
   5  10   3 879.127 11.1851   1
   5 -10   4 2.67205 4.58395   1
   5  10   5 130.086 7.09007   1
  -5 -10  -6-0.05837 5.48997   1
   5 -10   7 118.964 10.9844   1
   5 -10   8-0.19478 7.73068   1
   5  10   9 155.483 12.1559   1
   5  10  10 14.0772 9.02680   1
  -5 -10 -11 70.1693 10.8851   1
   5 -10  12 3.96522 12.2269   1
   5 -10  13 223.473 16.6421   1
  -5  10 -14 1.40650 14.8547   1
  -5  10 -15 67.6268 23.3524   1
   5  11 -13 20.1587 13.7704   1
   5  11 -12 5.58073 8.25853   1
   5  11 -11 3.59015 7.75727   1
   5  11 -10 18.4751 9.58583   1
   5  11  -9 138.488 10.8383   1
   5  11  -8 71.7839 10.0954   1
   5  11  -7 466.317 14.1979   1
   5  11  -6 34.4592 7.34086   1
   5  11  -5 203.540 10.9256   1
   5  11  -4 12.2859 8.92952   1
  -5 -11   3 492.688 11.7959   1
   5  11  -2 9.38585 5.04478   1
  -5 -11   1 25.7334 5.63614   1
   5  11   0 0.95092 4.97021   1
  -5 -11   1 12.1184 9.82180  -2
   5  11   0 12.1184 9.82180   1
  -5  11   0 2.81258 8.67517  -2
   5 -11   0 2.81258 8.67517   1
   5 -11   1 104.061 5.46609   1
  -5  11   1 131.273 10.6883  -2
   5 -11   1 131.273 10.6883   1
   5 -11   2 71.8524 4.10832   1
   5  11   3 210.452 6.27391   1
   5 -11   4 7.41568 5.71884   1
   5 -11   5 187.805 10.1887   1
   5  11   6 21.0653 7.43616   1
  -5 -11  -7 545.277 18.7120   1
   5 -11   8-4.81160 8.44482   1
   5  11   9 276.319 14.6168   1
   5  11  10-1.65664 8.73208   1
   5  11  11 45.0289 10.8731   1
   5 -11  12 26.7247 15.2014   1
  -5  12  12 15.3162 13.6230   1
   5  12 -11 94.7932 14.1369   1
   5  12 -10-2.75566 9.62714   1
   5  12  -9 210.277 14.1215   1
   5  12  -8 12.8549 9.15782   1
   5  12  -7 5.11788 7.48130   1
   5  12  -6 11.7605 7.43035   1
   5  12  -5 28.8406 8.67604   1
   5  12  -4 36.0023 9.70238   1
   5  12  -3 136.281 11.9640   1
   5 -12  -2 5.77746 6.16698   1
   5  12  -1 323.654 11.6987   1
   5  12   0 7.13532 5.47023   1
   5  12   1 370.585 10.5453   1
   5 -12   2 16.6245 5.54287   1
   5  12   3 223.651 9.33911   1
   5 -12   4 31.8246 7.50866   1
   5 -12   5 22.0682 7.30979   1
   5 -12   6 9.37295 7.12846   1
   5 -12   7 84.4104 11.1366   1
   5  12   8 19.2084 9.25882   1
   5  12   9 48.6042 10.4900   1
  -5 -12 -10-2.01000 9.54016   1
   5  12  11 31.0551 13.2548   1
   5  13 -11-14.8838 12.1382   1
   5  13 -10 37.0622 13.5437   1
   5  13  -9 45.0667 11.0698   1
   5  13  -8 20.1498 9.67646   1
  -5  13   7 146.262 13.1850   1
   5  13  -6 14.8086 9.09196   1
   5  13  -5 176.015 16.2262   1
   5  13  -4 5.49293 9.47575   1
   5  13  -3 308.438 16.0708   1
   5  13  -2 9.53914 9.23980   1
  -5 -13   1 5.71762 8.44675   1
   5 -13   0 52.3276 8.73898   1
   5 -13   1 36.2613 7.08948   1
   5 -13   2 87.6769 7.41926   1
   5 -13   3 109.074 8.05764   1
   5 -13   4 33.8652 6.71539   1
   5 -13   5 77.0282 9.10581   1
   5  13   6 29.6593 8.20006   1
   5  13   7 196.445 14.1290   1
   5  13   8 11.8668 9.52483   1
   5  13   9 103.065 12.6081   1
   5  13  10 23.6997 20.9327   1
  -5  14   9 35.8971 17.9657   1
  -5  14   8 15.5856 12.4673   1
   5  14  -7-6.87864 11.5119   1
   5  14  -6 34.7224 17.7439   1
   5  14  -5 9.19647 9.94467   1
   5  14  -4 56.3432 11.5601   1
   5  14  -3 74.3218 10.7140   1
   5  14  -2 23.8060 8.87638   1
   5  14  -1 61.3907 10.3296   1
   5 -14   0 5.30744 10.8871   1
   5  14   1 61.9922 10.1727   1
   5  14   2 2.14784 7.30818   1
   5  14   3 146.340 10.4055   1
   5 -14   4 11.4480 7.81676   1
   5  14   5 28.2182 8.36598   1
   5  14   6 27.2229 8.53090   1
   5  14   7 35.5532 10.9247   1
   5  14   8 34.0065 15.5471   1
   5  14   9 34.1903 23.6176   1
   5  14  10 41.2360 23.4948   1
  -5 -15   7 39.1854 24.3265   1
  -5 -15   6 17.2081 23.4019   1
  -5 -15   5 54.1869 16.3916   1
   5  15  -4 18.0823 9.51332   1
   5  15  -3 114.256 14.0384   1
   5  15  -2 28.9613 11.3447   1
   5  15  -1 2.79186 10.6923   1
   5 -15   0 61.4083 13.2964   1
   5  15   1 8.41834 10.7534   1
   5  15   2 57.9264 11.0273   1
   5  15   3 30.3020 10.3375   1
   5  15   4 15.0320 12.8905   1
   5  15   5 7.79809 10.5511   1
   5 -15   6 0.80331 11.8362   1
   5 -15   7 65.2253 20.4379   1
   5  16  -4 26.9572 24.1207   1
   5  16  -3 14.7480 24.0151   1
   5  16  -2 34.4910 26.1952   1
   5 -16  -1 9.17902 18.7649   1
   5 -16   0 7.13747 18.0639   1
   5 -16   1 17.4336 18.2373   1
   5 -16   2 18.9543 18.5882   1
   5 -16   3 43.2805 19.9089   1
   5 -16   4-1.72587 17.6316   1
   5 -16   5-11.8496 16.0960   1
  -6   0  18 68.6708 20.3511   1
  -6   0  16 229.458 18.6184   1
  -6   0  14 135.783 15.1281   1
  -6   0  12 809.775 24.9704   1
  -6   0  10 699.834 22.5835   1
  -6   0   8 721.762 17.9064   1
  -6   0   6 470.346 11.0046   1
  -6   0   4 304.844 9.77689   1
   6   0  -2 51.4276 4.88271   1
   6   0   0 2915.44 15.0672   1
   6   0   2 1056.22 14.0486   1
   6   0   4 2423.51 22.5945   1
   6   0   6 50.0006 7.88206   1
  -6   0  -8 14.4333 5.41386   1
   6   0  10 23.7639 4.47869   1
   6   0  12 532.498 19.1081   1
  -6   0 -14 266.094 18.8137   1
  -6   0 -16 341.564 21.5375   1
   6   0  18 21.5309 18.9218   1
  -6  -1  18 216.816 26.1244   1
  -6   1  17 10.2276 11.1531   1
   6   1  16-11.0812 31.2346  -2
  -6  -1  17-11.0812 31.2346   1
  -6   1  16 272.170 17.3894   1
   6   1  15 291.037 36.9097  -2
  -6  -1  16 291.037 36.9097   1
  -6   1  15-2.04737 9.84941   1
   6   1  14 17.1640 28.4073  -2
  -6  -1  15 17.1640 28.4073   1
  -6   1  14 90.6832 10.7901   1
  -6   1  13 5.97767 7.37800   1
  -6   1  12 180.432 10.8764   1
  -6  -1  11 18.1860 8.32531   1
   6   1  10 740.002 35.7225  -2
  -6  -1  11 740.002 35.7225   1
  -6   1  10 633.148 16.8399   1
   6   1   9 613.480 32.4820  -2
  -6  -1  10 613.480 32.4820   1
  -6   1   9 11.2458 4.91469   1
   6   1   8 417.869 27.0369  -2
  -6  -1   9 417.869 27.0369   1
  -6   1   8 285.705 8.72376   1
  -6   1   7 1.20099 2.93753   1
  -6  -1   6 2721.29 15.4625   1
   6   1   5 2832.46 48.1542  -2
  -6  -1   6 2832.46 48.1542   1
  -6  -1   5 8.40329 2.09876   1
   6  -1  -4 1720.53 11.7449   1
  -6  -1   3 13.8601 2.20075   1
   6  -1  -2 1761.06 19.9265   1
  -6  -1   1 8.52119 2.61814   1
  -6   1   0 175.297 3.44145   1
  -6   1  -1 32.7117 2.81574   1
  -6  -1  -2 398.882 5.99739   1
   6   1   3 55.7211 3.31605   1
   6   1   4 371.736 6.72603   1
   6   1   5 15.5286 3.02501   1
   6   1   6 2127.01 21.4030   1
   6  -1   7 12.3110 3.69595   1
  -6  -1  -8 929.962 12.5651   1
  -6  -1  -9 24.8668 4.75118   1
   6   1  10 992.903 13.3389   1
  -6  -1 -11 10.8918 5.66898   1
  -6  -1 -12 24.4308 7.58430   1
   6   1  13 17.4089 8.54351   1
  -6  -1 -14 16.9932 9.22106   1
   6  -1  15-7.62326 9.04298   1
   6   1  16 77.8902 11.8777   1
   6   1  17-6.17747 12.1856   1
  -6  -2  18 59.6876 17.2162   1
  -6   2  17 13.7137 13.0460   1
   6   2  16 137.816 24.8370  -2
  -6  -2  17 137.816 24.8370   1
  -6   2  16 66.6055 14.9893   1
   6  -2  15 76.2233 22.1725  -2
  -6   2  16 76.2233 22.1725   1
  -6   2  15 32.4553 11.6960   1
   6  -2  14 143.491 22.8779  -2
  -6   2  15 143.491 22.8779   1
  -6   2  14 50.5697 11.4010   1
   6   2  13 31.2669 20.1885  -2
  -6  -2  14 31.2669 20.1885   1
  -6   2  13 20.5042 7.04728   1
  -6   2  12 849.493 22.5774   1
   6   2  11 808.916 28.1911  -2
  -6  -2  12 808.916 28.1911   1
  -6   2  11 15.4722 5.21720   1
   6   2  10 33.7054 22.7470  -2
  -6  -2  11 33.7054 22.7470   1
  -6   2  10 908.574 13.2736   1
  -6  -2   9 20.9393 4.35145   1
   6   2   8 24.8282 18.9445  -2
  -6  -2   9 24.8282 18.9445   1
  -6   2   8 900.688 12.0031   1
  -6   2   7 131.184 4.08445   1
  -6  -2   6 355.410 5.28182   1
   6   2   5 413.425 22.5915  -2
  -6  -2   6 413.425 22.5915   1
  -6  -2   5 147.561 4.38457   1
  -6  -2   4 335.739 6.60477   1
  -6  -2   3 238.249 5.76405   1
   6  -2  -2 44.7244 2.88272   1
   6   2  -1 149.325 4.08042   1
   6   2   0 2484.21 12.9163   1
  -6  -2  -1 90.8486 3.17433   1
   6  -2   2 774.545 8.35810   1
  -6  -2  -3 125.904 4.26396   1
   6   2   4 2163.29 15.8715   1
  -6   2  -5 47.5751 3.92110   1
   6   2   6 143.936 8.01938   1
  -6  -2  -7 164.401 5.80833   1
  -6   2  -8 5.11667 3.41981   1
  -6  -2  -9 122.412 4.73478   1
   6   2  10 147.504 4.62384   1
   6  -2  11 20.1385 3.16488   1
   6  -2  12 403.681 9.83970   1
  -6   2 -13 15.6299 7.53622   1
  -6  -2 -14 184.758 11.5995   1
   6  -2  15-2.93428 8.18267   1
  -6   2 -16 326.589 15.0270   1
   6  -2  17-5.94945 18.8671   1
  -6  -3  18 136.952 25.4153   1
  -6  -3  17-14.6757 13.8479   1
  -6   3  16 254.885 21.0618   1
   6   3  15 285.690 26.3684  -2
  -6  -3  16 285.690 26.3684   1
  -6   3  15 11.2841 12.6149   1
   6   3  14 21.4006 20.4994  -2
  -6  -3  15 21.4006 20.4994   1
  -6   3  14 33.4888 10.2903   1
   6  -3  13 104.132 30.3870  -2
  -6   3  14 104.132 30.3870   1
  -6   3  13 128.456 12.2138   1
   6   3  12 115.351 27.6188  -2
  -6  -3  13 115.351 27.6188   1
  -6  -3  12 30.7186 6.90099   1
  -6   3  11 64.0977 5.42969   1
   6   3  10 546.802 23.6249  -2
  -6  -3  11 546.802 23.6249   1
  -6   3  10 300.986 6.92351   1
  -6   3   9 274.448 6.39870   1
  -6  -3   8 119.669 4.28837   1
   6  -3   7 210.684 22.0406  -2
  -6   3   8 210.684 22.0406   1
  -6   3   7 75.9041 5.34105   1
  -6  -3   6 2306.40 14.2885   1
  -6   3   5 14.7833 2.00633   1
  -6  -3   4 970.658 11.2114   1
  -6  -3   3 86.3428 4.71239   1
  -6  -3   2 1512.00 12.9045   1
   6   3  -1 144.139 4.01554   1
   6   3   0 167.856 3.20557   1
   6  -3   1 397.164 5.47267   1
  -6  -3  -2 92.5651 3.78543   1
   6   3   3 397.414 8.11042   1
   6   3   4 321.438 7.82241   1
  -6  -3  -5 23.6165 3.46229   1
   6   3   6 1884.96 31.7884   1
   6  -3   7 45.8782 6.34884   1
   6   3   8 339.864 7.19188   1
   6  -3   9 69.9293 4.40658   1
   6   3  10 1089.49 13.5207   1
   6   3  11 24.6076 3.75082   1
  -6   3 -12 32.3071 7.61134   1
  -6  -3 -13 81.2963 8.67133   1
  -6   3 -14 45.1305 8.74817   1
   6  -3  15 23.3366 8.67541   1
   6   3  16 31.5444 8.61572   1
  -6  -4  17 19.1833 18.7255   1
  -6   4  16 51.2978 14.7220   1
   6   4  15 84.3466 22.9178  -2
  -6  -4  16 84.3466 22.9178   1
  -6   4  15 140.926 13.7107   1
   6  -4  14 154.317 33.4898  -2
  -6   4  15 154.317 33.4898   1
  -6  -4  14 72.5509 11.5085   1
   6  -4  13 74.6453 30.4388  -2
  -6   4  14 74.6453 30.4388   1
  -6  -4  13 25.7800 8.22371   1
  -6   4  12 601.910 14.4681   1
  -6  -4  11 1.40231 6.62129   1
   6  -4  10 42.5388 24.1064  -2
  -6   4  11 42.5388 24.1064   1
  -6   4  10 511.280 10.9786   1
  -6  -4   9 99.0890 5.68522   1
  -6   4   8 399.625 10.3333   1
  -6  -4   7 438.555 6.05667   1
  -6   4   6 159.238 4.91565   1
  -6   4   5 571.055 7.56401   1
   6   4  -4 216.885 5.94932   1
   6  -4  -3 832.422 10.0432   1
  -6  -4   2 57.2610 4.67346   1
   6   4  -1 12.4189 2.04558   1
   6   4   0 1582.07 9.46360   1
   6  -4   1 15.8279 2.52342   1
   6  -4   2 308.725 9.07033   1
   6   4   3 133.412 5.12426   1
   6   4   4 1303.04 15.4921   1
   6  -4   5 109.916 4.74142   1
   6  -4   6 16.3266 5.12995   1
   6   4   7 399.745 9.47121   1
  -6   4  -8 19.3618 5.20033   1
   6   4   9 366.792 7.72851   1
   6  -4  10 99.3166 5.52271   1
   6  -4  11 148.940 5.84971   1
  -6  -4 -12 402.465 16.4548   1
  -6   4 -13 41.4734 7.96340   1
   6  -4  14 90.5016 9.69820   1
   6   4  15 18.4064 8.04108   1
   6  -4  16 96.2023 12.3988   1
  -6   5  17-10.1935 21.8576   1
  -6   5  16 109.006 15.8778   1
   6   5  15 124.097 34.2097  -2
  -6  -5  16 124.097 34.2097   1
  -6  -5  15 3.82585 9.81734   1
   6  -5  14 45.7024 31.9932  -2
  -6   5  15 45.7024 31.9932   1
  -6   5  14 17.0921 11.8810   1
   6   5  13 76.8741 20.8573  -2
  -6  -5  14 76.8741 20.8573   1
  -6   5  13 191.093 11.3558   1
  -6  -5  12 66.9456 7.65823   1
  -6   5  11 145.326 9.52002   1
   6   5  10 357.643 28.9939  -2
  -6  -5  11 357.643 28.9939   1
  -6   5  10 243.242 9.34809   1
  -6   5   9 369.699 8.56524   1
  -6   5   8 75.8668 4.33440   1
  -6   5   7 93.3348 5.60919   1
  -6   5   6 1179.10 12.7734   1
  -6   5   5 615.042 7.89259   1
  -6   5   4 475.860 8.20252   1
  -6   5   3 17.4413 3.07133   1
   6  -5  -2 798.622 8.73243   1
   6   5  -1 608.549 7.72105   1
   6   5   0 154.589 3.95194   1
   6  -5   1 662.790 9.24028   1
   6  -5   2 11.5634 3.17173   1
   6   5   3 1203.51 17.8031   1
   6   5   4 240.861 9.65203   1
   6   5   5 278.211 6.51162   1
   6   5   6 1510.50 20.1564   1
   6  -5   7 65.7819 5.93282   1
   6   5   8 273.729 8.93173   1
   6   5   9 170.361 8.08380   1
   6  -5  10 525.527 10.4565   1
   6   5  11 78.9376 5.24017   1
  -6  -5 -12 12.3452 8.18781   1
  -6   5 -13 196.766 11.6201   1
   6   5  14 18.8139 7.74215   1
   6  -5  15 57.0905 11.2422   1
   6   5  16 25.1343 25.4302   1
  -6  -6  16 61.9430 20.0089   1
   6   6  15 59.5868 23.0532  -2
  -6  -6  16 59.5868 23.0532   1
  -6   6  15 193.255 23.6277   1
   6   6  14 204.530 24.4393  -2
  -6  -6  15 204.530 24.4393   1
  -6  -6  14 29.0021 8.60310   1
  -6  -6  13 41.4008 8.55752   1
  -6   6  12 305.494 11.0066   1
  -6  -6  11 12.9795 6.63668   1
  -6  -6  10 169.258 8.92597   1
  -6   6   9 131.491 6.87111   1
  -6   6   8 82.7847 6.09910   1
  -6   6   7 915.140 13.4285   1
  -6   6   6 137.536 6.90591   1
  -6  -6   5 600.435 9.43621   1
  -6   6   4 35.7382 3.84500   1
   6  -6  -3 737.374 7.59204   1
   6   6  -2 53.5377 3.96027   1
   6   6  -1 42.2634 3.28754   1
   6   6   0 1075.83 10.1419   1
   6  -6   1 183.218 5.58780   1
   6  -6   2 35.8313 4.17455   1
   6  -6   3 208.409 6.83522   1
   6   6   4 225.543 8.97838   1
   6   6   5 555.688 10.4136   1
   6   6   6 72.3150 7.56643   1
   6   6   7 784.813 17.2598   1
   6   6   8 57.0821 7.06127   1
   6   6   9 411.258 12.4345   1
  -6  -6 -10 13.5191 5.40653   1
  -6   6 -11 128.865 7.14159   1
  -6   6 -12 84.3225 11.8487   1
   6  -6  13 32.3569 7.77654   1
   6  -6  14 42.9717 10.4618   1
   6  -6  15 22.2891 10.1220   1
   6   6  16 166.543 31.3414   1
   6   7  15 54.8305 23.5001  -2
  -6  -7  16 54.8305 23.5001   1
  -6   7  15 16.0649 12.6160   1
   6   7  14 50.7880 28.9231  -2
  -6  -7  15 50.7880 28.9231   1
   6   7 -14-4.54718 7.35172   1
  -6   7  13 295.126 12.2703   1
  -6   7  12 12.7246 7.75109   1
  -6   7  11 208.846 11.0009   1
  -6   7  10 163.363 8.44351   1
  -6   7   9 798.242 12.6758   1
  -6   7   8 60.9414 5.55107   1
  -6   7   7 84.9791 6.44205   1
  -6   7   6 653.131 13.4460   1
  -6   7   5 47.2479 5.03189   1
  -6  -7  -4 58.1898 14.0095  -2
   6   7  -5 58.1898 14.0095   1
   6  -7  -4 53.0282 6.11854   1
  -6  -7  -3 286.731 12.4606  -2
   6   7  -4 286.731 12.4606   1
  -6   7   3 163.999 4.11873   1
  -6  -7  -2 215.755 15.7157  -2
   6   7  -3 215.755 15.7157   1
  -6   7   2 120.898 5.26118   1
   6   7  -1 417.164 5.97822   1
  -6  -7   0 518.925 20.2877  -2
   6   7  -1 518.925 20.2877   1
   6  -7   0 6.99338 2.61142   1
   6   7   1 711.859 11.0635   1
   6   7   2 54.2861 4.74111   1
   6   7   3 593.168 14.3872   1
   6   7   4 44.1143 6.54332   1
   6   7   5 86.8131 7.04689   1
   6   7   6 327.951 12.0087   1
   6   7   7 259.646 10.3394   1
   6   7   8 82.1382 7.86450   1
   6   7   9 75.2411 8.22131   1
   6  -7  10 184.457 10.5375   1
   6   7  11 90.5621 8.08268   1
  -6   7 -12 0.22284 9.22132   1
   6   7  13 233.619 16.2248   1
   6  -7  14 10.0461 9.61324   1
  -6   7 -15 73.0626 14.4616   1
   6   7  16 72.9901 27.2478   1
  -6   8  15 166.929 19.4648   1
   6   8  14 138.011 30.9203  -2
  -6  -8  15 138.011 30.9203   1
   6   8 -14-2.79425 8.64961   1
   6   8 -13 19.5149 8.08781   1
   6   8 -12 55.5380 8.38771   1
   6   8 -11 9.79358 6.47385   1
   6   8 -10 20.3173 6.40924   1
  -6   8   9 76.8245 7.01047   1
  -6   8   8 14.1656 6.26792   1
  -6   8   7 601.892 14.0160   1
  -6   8   6 10.9781 5.50526   1
  -6   8   5 296.336 10.4823   1
  -6   8   4 35.3380 7.27137   1
  -6  -8  -3 165.069 11.1279  -2
   6   8  -4 165.069 11.1279   1
   6   8  -3 759.948 17.6818   1
  -6  -8  -2 936.159 18.4949  -2
   6   8  -3 936.159 18.4949   1
   6  -8  -2 6.70341 3.21472   1
  -6   8  -1 79.1382 9.21858  -2
   6  -8  -2 79.1382 9.21858   1
   6   8  -1 238.937 5.90832   1
  -6  -8   0 317.356 17.4150  -2
   6   8  -1 317.356 17.4150   1
   6   8   0 203.308 5.88260   1
  -6  -8   1 265.559 16.6282  -2
   6   8   0 265.559 16.6282   1
   6   8   1 190.680 6.49916   1
   6   8   2 72.3711 8.00647   1
   6   8   3 397.877 14.0234   1
   6   8   4 263.087 12.2059   1
   6   8   5 370.534 11.0462   1
   6   8   6 7.84560 5.89600   1
   6  -8   7 837.853 17.7451   1
   6   8   8-9.48431 6.13885   1
   6  -8   9 535.462 15.1342   1
   6   8  10 22.4564 8.74556   1
   6   8  11 100.452 11.0612   1
   6  -8  12 14.4460 10.4516   1
  -6   8 -13 69.5615 11.3815   1
  -6   8 -14 5.22302 11.0349   1
  -6   8 -15 8.47473 11.5152   1
   6  -9  14-3.34299 32.1574  -2
  -6   9  15-3.34299 32.1574   1
  -6  -9  14 1.88614 10.2341   1
   6   9 -13 235.448 13.3420   1
  -6   9  12-6.32283 6.41981   1
  -6   9  11 276.111 10.7023   1
  -6   9  10 43.9851 6.88144   1
  -6   9   9 612.703 18.3547   1
   6   9  -8 10.4619 6.29670   1
   6   9   7 107.280 23.1495  -2
  -6  -9   8 107.280 23.1495   1
   6   9  -7 39.3880 6.64243   1
   6   9  -6 60.3041 7.10633   1
   6   9  -5 68.3558 8.91402   1
   6   9  -4 4.01563 7.51398   1
  -6   9  -3 237.420 16.8857  -2
   6  -9  -4 237.420 16.8857   1
   6   9  -3 172.546 9.74321   1
  -6  -9  -2 146.732 10.4347  -2
   6   9  -3 146.732 10.4347   1
   6   9  -2 13.8518 4.63261   1
  -6  -9  -1 220.647 11.2618  -2
   6   9  -2 220.647 11.2618   1
   6   9  -1 325.860 9.40358   1
  -6  -9   0 333.811 12.5422  -2
   6   9  -1 333.811 12.5422   1
   6   9   0 7.73426 4.64339   1
  -6  -9   1 111.851 9.58528  -2
   6   9   0 111.851 9.58528   1
   6   9   1 512.544 11.4561   1
  -6  -9   2 613.943 15.1954  -2
   6   9   1 613.943 15.1954   1
   6   9   2 5.24329 6.32700   1
   6   9   3 744.607 18.1343   1
   6   9   4 1.19709 4.67228   1
   6   9   5 169.972 8.31318   1
   6   9   6 53.3495 7.41517   1
   6   9   7 141.254 9.59171   1
   6   9   8 4.18502 6.95136   1
   6   9   9 169.498 13.0969   1
   6  -9  10 52.4910 10.6666   1
   6  -9  11 73.0503 10.5171   1
   6  -9  12-15.7954 11.8243   1
   6  -9  13 242.609 19.5122   1
   6   9  14 31.2000 28.6872   1
  -6  10  15 83.5614 22.6981   1
  -6  10  14 13.5502 18.1949   1
   6  10 -13-2.34014 11.0067   1
   6  10 -12 3.12267 10.0424   1
   6  10 -11 5.37503 9.24420   1
   6  10 -10 7.88688 8.70230   1
   6  10   9 69.4739 24.8042  -2
  -6 -10  10 69.4739 24.8042   1
   6  10  -9 121.753 11.5016   1
   6  10   8 138.752 25.8738  -2
  -6 -10   9 138.752 25.8738   1
   6  10  -8-2.74848 7.50255   1
   6  10   7 143.358 26.2163  -2
  -6 -10   8 143.358 26.2163   1
   6  10  -7 309.652 11.9969   1
   6  10   6 370.427 31.9311  -2
  -6 -10   7 370.427 31.9311   1
  -6  10   6 3.04509 6.83723   1
   6  10   5 43.6784 21.6929  -2
  -6 -10   6 43.6784 21.6929   1
   6  10  -5 405.647 13.6050   1
   6  10  -4 21.8187 7.18920   1
   6  10  -3 927.598 21.0401   1
  -6  10  -2 840.913 24.7681  -2
   6 -10  -3 840.913 24.7681   1
   6  10  -2 4.21037 7.59482   1
  -6  10  -1 9.66818 7.98394  -2
   6 -10  -2 9.66818 7.98394   1
  -6 -10   1 43.2528 8.55867   1
  -6 -10   0 40.5798 8.33498  -2
   6  10  -1 40.5798 8.33498   1
   6  10   0 23.4966 5.32017   1
  -6  10   1 36.4125 8.07372  -2
   6 -10   0 36.4125 8.07372   1
   6  10   1 60.1176 5.62368   1
  -6 -10   2 62.1510 8.55426  -2
   6  10   1 62.1510 8.55426   1
   6  10   2 30.5642 5.34187   1
  -6 -10   3 365.315 17.6143  -2
   6  10   2 365.315 17.6143   1
   6  10   3 215.249 8.46913   1
   6  10   4 25.8555 5.73502   1
   6 -10   5 176.770 8.56209   1
   6  10   6 2.69808 6.54406   1
   6 -10   7 415.541 13.8796   1
   6  10   8-5.42721 8.88070   1
   6 -10   9 293.041 15.0702   1
   6 -10  10 5.82862 8.83913   1
   6 -10  11 134.060 12.4465   1
   6 -10  12-4.63265 12.3617   1
   6  11 -13 167.993 21.7217   1
   6  11 -12 6.70873 15.4633   1
   6  11 -11 83.3750 15.9744   1
   6  11  10 201.669 31.3273  -2
  -6 -11  11 201.669 31.3273   1
   6  11 -10-6.67448 8.80006   1
   6  11   9 77.2669 26.3922  -2
  -6 -11  10 77.2669 26.3922   1
   6  11  -9 379.625 16.5678   1
   6  11   8 457.773 36.8795  -2
  -6 -11   9 457.773 36.8795   1
   6  11  -8 19.3581 12.8803   1
   6 -11   7 8.06925 13.1402  -2
  -6  11   8 8.06925 13.1402   1
   6  11  -7 39.0432 7.93525   1
   6  11   6 39.4773 23.9380  -2
  -6 -11   7 39.4773 23.9380   1
   6  11  -6 2.92397 8.96328   1
   6  11  -5 37.2962 8.89444   1
   6  11  -4 40.5606 9.04711   1
   6 -11  -3 148.387 8.71870   1
   6  11  -2 11.7913 6.24962   1
  -6  11  -1 97.6455 13.1088  -2
   6 -11  -2 97.6455 13.1088   1
  -6 -11   1 261.387 12.3542   1
  -6  11   0 204.984 11.0773  -2
   6 -11  -1 204.984 11.0773   1
   6  11   0 18.0901 6.35307   1
  -6  11   1 89.5477 8.91843  -2
   6 -11   0 89.5477 8.91843   1
   6 -11   1 324.123 11.7800   1
  -6 -11   2 325.032 11.7487  -2
   6  11   1 325.032 11.7487   1
   6  11   2 6.75118 5.08872   1
  -6 -11   3 64.4406 8.46416  -2
   6  11   2 64.4406 8.46416   1
   6  11   3 512.922 11.6346   1
  -6 -11   4 491.368 19.2833  -2
   6  11   3 491.368 19.2833   1
   6  11   4 13.8560 6.88104   1
   6  11   5 71.8940 8.21402   1
   6  11   6 3.41922 7.12978   1
   6  11   7 33.2296 9.84744   1
   6  11   8 34.0882 9.77926   1
   6 -11   9 51.4677 10.8391   1
   6 -11  10 0.24353 9.26783   1
   6 -11  11 34.2293 15.2316   1
   6  12 -12 2.66627 23.9264   1
   6  12 -11-11.6416 23.5851   1
   6  12 -10 45.1700 19.3489   1
   6  12   9 128.236 30.5693  -2
  -6 -12  10 128.236 30.5693   1
   6  12  -9 87.2632 20.6807   1
   6  12   8 26.6387 26.2026  -2
  -6 -12   9 26.6387 26.2026   1
   6  12  -8 61.1151 19.1639   1
   6 -12   7 115.862 16.5679  -2
  -6  12   8 115.862 16.5679   1
   6  12  -7 246.127 25.4063   1
   6  12   6 317.111 34.7437  -2
  -6 -12   7 317.111 34.7437   1
   6  12  -6 10.8693 9.36288   1
   6  12   5 23.7867 26.2542  -2
  -6 -12   6 23.7867 26.2542   1
   6  12  -5 167.274 13.3078   1
   6  12   4 196.245 30.8009  -2
  -6 -12   5 196.245 30.8009   1
   6  12  -4-5.56749 8.65632   1
   6  12   3 49.8172 25.7537  -2
  -6 -12   4 49.8172 25.7537   1
   6  12  -3 452.595 16.1796   1
   6  12  -2 25.2644 8.73600   1
  -6 -12   1 22.7491 7.85157   1
   6  12   0 5.95328 7.06758   1
   6  12   1 32.9242 7.76867   1
   6  12   2 25.9823 7.76321   1
   6 -12   3 84.1275 9.59296   1
   6  12   4 6.60445 7.84126   1
   6  12   5 76.2236 9.19517   1
   6 -12   6 13.9427 7.92145   1
  -6 -12  -7 314.992 16.3729   1
   6 -12   8 12.0022 11.3477   1
  -6 -12   9 60.9644 26.2757  -2
   6  12   8 60.9644 26.2757   1
   6  12   9 171.521 13.6130   1
   6  12  10 7.74045 13.4712   1
   6  13  -9 161.335 24.1235   1
   6  13  -8-0.97373 16.9725   1
   6  13   7 7.86712 26.5204  -2
  -6 -13   8 7.86712 26.5204   1
   6  13  -7-0.85509 12.5675   1
   6  13   6-1.91124 26.2345  -2
  -6 -13   7-1.91124 26.2345   1
   6  13  -6 24.6859 12.7092   1
   6  13   5 35.3919 27.7095  -2
  -6 -13   6 35.3919 27.7095   1
   6  13  -5 6.69767 10.2956   1
   6  13   4 43.7585 28.0875  -2
  -6 -13   5 43.7585 28.0875   1
   6  13  -4 57.4040 11.4358   1
   6  13   3 167.527 31.4253  -2
  -6 -13   4 167.527 31.4253   1
   6  13  -3 73.8977 11.7753   1
   6  13   2 121.152 28.3765  -2
  -6 -13   3 121.152 28.3765   1
   6  13  -2 43.0748 10.8342   1
   6  13  -1 79.4585 17.0471   1
   6  13   0 53.6742 13.0620   1
   6 -13   1 131.340 10.5378   1
   6 -13   2 3.91016 7.85511   1
   6  13   3 208.784 12.2413   1
   6 -13   4 15.7748 8.04593   1
   6 -13   5 38.0580 8.64113   1
  -6 -13  -6 33.5796 9.06142   1
   6 -13   7 39.2720 10.6372   1
   6  13   8 40.6193 12.4656   1
   6  13   9 41.7820 22.1799   1
   6  13  10 15.4352 20.4405   1
  -6 -14   7 115.687 29.9757   1
   6  14  -6 3.54774 12.9101   1
   6  14   5-12.5919 27.4883  -2
  -6 -14   6-12.5919 27.4883   1
   6  14  -5 54.2615 11.8649   1
   6  14   4 71.6144 28.8129  -2
  -6 -14   5 71.6144 28.8129   1
   6  14  -4 7.83823 10.9209   1
   6  14   3 32.0171 27.4501  -2
  -6 -14   4 32.0171 27.4501   1
   6  14  -3 130.824 13.4043   1
   6  14  -2 39.4557 13.8121   1
   6  14  -1 25.2744 15.3152   1
   6  14   0 63.5070 14.7361   1
   6  14   1 9.29973 10.1807   1
   6  14   2 40.8059 10.0579   1
   6 -14   3 48.7553 8.56709   1
   6 -14   4 20.2376 8.31171   1
   6  14   5 20.4710 9.09347   1
   6  14   6 6.83588 11.0305   1
   6  14   7 78.8636 16.9664   1
   6  14   8 2.29421 22.2946   1
  -6 -15   6 17.5564 22.9480   1
  -6 -15   5 14.3924 22.5504   1
  -6 -15   4 77.7375 17.4397   1
   6  15  -3 52.5855 26.4403   1
   6  15  -2 77.6777 17.9543   1
   6  15  -1 14.0757 15.2475   1
   6 -15   0 22.8364 15.9668   1
   6 -15   1 57.8581 17.7394   1
   6 -15   2 7.36141 18.2684   1
   6 -15   3 55.0567 21.1920   1
   6 -15   4 11.0387 19.5060   1
   6 -15   5 9.04544 19.0919   1
   6 -15   6 44.8227 18.1048   1
  -7   0  16 320.596 25.2256   1
  -7   0  14 88.1052 16.6469   1
  -7   0  12 273.600 12.1801   1
  -7   0  10 147.704 11.1812   1
  -7   0   8 237.430 9.17195   1
   7   0  -6 1962.64 16.9232   1
  -7   0   4 945.653 14.0039   1
   7   0  -2 1652.67 19.8274   1
   7   0   0 422.702 6.17005   1
   7   0   2 6.35001 3.28925   1
  -7   0  -4 264.814 8.08624   1
   7   0   6 2059.68 34.4639   1
  -7   0  -8 546.581 16.9050   1
  -7   0 -10 1089.54 21.6136   1
  -7   0 -12 40.4553 13.9350   1
  -7   0 -14 15.8082 13.3483   1
   7   0  16 123.584 21.2896   1
   7   1  17 26.4583 34.0723  -2
  -7  -1  18 26.4583 34.0723   1
  -7   1  17 6.51052 27.9325   1
   7   1  16 90.9854 36.1166  -2
  -7  -1  17 90.9854 36.1166   1
  -7   1  16 52.3855 30.8241   1
   7   1  15 63.6243 24.1269  -2
  -7  -1  16 63.6243 24.1269   1
  -7   1  15 45.3869 28.7660   1
   7   1  14 78.0947 18.9284  -2
  -7  -1  15 78.0947 18.9284   1
  -7   1  14 76.9129 23.0655   1
   7   1  13 89.7135 16.4120  -2
  -7  -1  14 89.7135 16.4120   1
  -7   1  13-11.7524 8.03881   1
   7   1  12 168.221 22.7494  -2
  -7  -1  13 168.221 22.7494   1
  -7   1  12 633.705 23.7426   1
  -7  -1 -11 763.932 18.1214  -2
   7   1 -12 763.932 18.1214   1
  -7   1  11-6.45210 7.17688   1
   7   1  10 35.5874 9.30062  -2
  -7  -1  11 35.5874 9.30062   1
  -7   1  10 587.695 20.9842   1
   7   1   9 725.204 19.7338  -2
  -7  -1  10 725.204 19.7338   1
  -7   1   9 0.21169 5.70073   1
   7   1   8 21.5101 9.31082  -2
  -7  -1   9 21.5101 9.31082   1
  -7   1   8 456.051 9.86190   1
   7   1   7 681.592 20.2396  -2
  -7  -1   8 681.592 20.2396   1
  -7   1   7 5.50064 2.84559   1
   7   1   6 71.0725 9.03761  -2
  -7  -1   7 71.0725 9.03761   1
  -7   1   6 505.958 8.38980   1
  -7   1  -5 568.582 17.1032  -2
   7  -1  -6 568.582 17.1032   1
  -7  -1   5 27.7012 2.92385   1
  -7   1  -4 583.655 16.8867  -2
   7  -1  -5 583.655 16.8867   1
  -7  -1   4 143.575 8.54108   1
  -7   1  -3 144.401 16.5012  -2
   7  -1  -4 144.401 16.5012   1
   7  -1  -3 145.491 6.42828   1
   7  -1   2 257.543 12.1664  -2
  -7   1   3 257.543 12.1664   1
  -7   1   2 312.288 9.26848   1
  -7   1  -1 348.123 12.5219  -2
   7  -1  -2 348.123 12.5219   1
  -7  -1   1 10.5277 3.22287   1
   7   1   0 2806.36 15.3939   1
   7   1   1 8.02249 2.61548   1
   7   1   2 832.107 9.19766   1
   7   1   3 1.05821 2.48742   1
   7   1   4 1794.11 14.6541   1
  -7   1  -5 30.2213 3.62134   1
   7   1   6 153.078 8.59471   1
   7   1   7 50.0945 6.69584   1
   7  -1   8 36.4017 5.83739   1
   7  -1   9 7.48899 5.27994   1
  -7  -1 -10 57.6826 5.81096   1
   7   1 -11 167.768 18.6939  -2
  -7  -1 -10 167.768 18.6939   1
   7   1  11 6.31366 5.70457   1
   7   1 -12 235.417 28.6716  -2
  -7  -1 -11 235.417 28.6716   1
  -7  -1 -12 404.262 13.9940   1
   7   1 -13 438.617 27.1579  -2
  -7  -1 -12 438.617 27.1579   1
   7   1  13 15.4803 10.7221   1
   7   1 -14 58.4612 25.2017  -2
  -7  -1 -13 58.4612 25.2017   1
   7   1  14 196.112 16.4086   1
   7   1 -15 116.527 24.1895  -2
  -7  -1 -14 116.527 24.1895   1
   7  -1  15 9.16933 12.0852   1
   7   1 -16-25.0671 20.8728  -2
  -7  -1 -15-25.0671 20.8728   1
   7   1  16 375.208 28.7680   1
  -7   1  17 424.724 38.6132  -2
   7  -1  16 424.724 38.6132   1
   7   1  17 1.77132 17.6518   1
  -7   2  17-3.08852 25.9564   1
   7   2  16 2.64354 35.5668  -2
  -7  -2  17 2.64354 35.5668   1
  -7   2  16 307.541 41.3566   1
   7   2  15 346.101 24.7061  -2
  -7  -2  16 346.101 24.7061   1
  -7   2  15 3.10757 26.6850   1
   7   2  14 3.41533 14.8560  -2
  -7  -2  15 3.41533 14.8560   1
  -7   2  14 55.7450 16.4898   1
   7  -2  13 142.016 19.4839  -2
  -7   2  14 142.016 19.4839   1
  -7   2  13 19.4214 10.3855   1
   7   2  12 77.1884 17.3062  -2
  -7  -2  13 77.1884 17.3062   1
  -7   2  12 103.322 12.8574   1
   7   2  11 135.711 17.1921  -2
  -7  -2  12 135.711 17.1921   1
  -7   2  11 29.2679 9.43281   1
   7   2  10 284.930 11.2588  -2
  -7  -2  11 284.930 11.2588   1
  -7   2  10 281.904 13.5112   1
   7   2   9 306.682 12.7823  -2
  -7  -2  10 306.682 12.7823   1
  -7  -2   9 120.820 6.54786   1
  -7  -2  -8 250.713 9.65847  -2
   7   2  -9 250.713 9.65847   1
  -7  -2   8 20.1565 5.86398   1
   7   2   7 118.178 7.93531  -2
  -7  -2   8 118.178 7.93531   1
  -7   2   7 2.39792 2.00205   1
  -7   2  -6 387.406 10.3290  -2
   7  -2  -7 387.406 10.3290   1
  -7  -2   6 1839.84 22.7700   1
  -7  -2  -5 1903.24 19.7877  -2
   7   2  -6 1903.24 19.7877   1
  -7  -2   5 8.20812 4.22582   1
  -7  -2  -4 74.3665 10.6300  -2
   7   2  -5 74.3665 10.6300   1
  -7  -2   4 682.108 11.7781   1
  -7   2  -3 753.396 27.1307  -2
   7  -2  -4 753.396 27.1307   1
   7  -2  -3 77.5525 6.46992   1
  -7  -2  -2 65.4369 7.27089  -2
   7   2  -3 65.4369 7.27089   1
  -7   2   2 979.011 15.1980   1
  -7  -2  -1 860.760 15.1018  -2
   7   2  -2 860.760 15.1018   1
  -7   2   1 191.230 6.65674   1
   7   2   0 384.493 6.19884   1
   7   2   1 85.0912 3.48537   1
  -7   2  -2 2.47807 2.51178   1
   7  -2   3 60.2308 4.00184   1
   7   2   4 121.693 5.04679   1
   7   2   5 8.86561 3.97189   1
  -7  -2  -6 1350.42 21.3944   1
   7  -2   7 33.5613 5.54442   1
  -7   2  -8 446.034 12.1517   1
  -7   2   9 642.684 36.4335  -2
   7  -2   8 642.684 36.4335   1
   7   2   9-0.39882 4.49907   1
  -7  -2  10 106.771 24.4890  -2
   7   2   9 106.771 24.4890   1
   7   2  10 825.569 13.1642   1
   7  -2 -11 1012.54 26.9632  -2
  -7   2 -10 1012.54 26.9632   1
  -7  -2 -11 15.5269 6.74715   1
   7  -2 -12 55.3109 13.8214  -2
  -7   2 -11 55.3109 13.8214   1
   7  -2  12 43.7422 11.5240   1
   7  -2 -13 49.3706 14.2551  -2
  -7   2 -12 49.3706 14.2551   1
   7  -2  13 64.2541 11.5378   1
   7  -2 -14 124.823 17.8733  -2
  -7   2 -13 124.823 17.8733   1
   7  -2  14 31.1287 16.5099   1
   7  -2 -15 5.92231 12.7756  -2
  -7   2 -14 5.92231 12.7756   1
   7   2  15 33.1963 14.4368   1
   7  -2 -16 35.5054 16.7783  -2
  -7   2 -15 35.5054 16.7783   1
   7  -2  16 65.7260 23.5376   1
  -7  -2  17 43.7672 24.9933  -2
   7   2  16 43.7672 24.9933   1
  -7   3  17 57.1828 30.0133   1
   7   3  16 162.711 39.8778  -2
  -7  -3  17 162.711 39.8778   1
  -7   3  16 69.3244 29.6182   1
   7   3  15 51.8402 19.7444  -2
  -7  -3  16 51.8402 19.7444   1
  -7   3  15 74.6557 28.5893   1
   7  -3  14 167.952 20.9251  -2
  -7   3  15 167.952 20.9251   1
  -7   3  14 31.9074 25.9044   1
   7   3  13 57.4126 17.9825  -2
  -7  -3  14 57.4126 17.9825   1
  -7   3  13 10.6796 11.8733   1
   7   3  12 175.522 18.7147  -2
  -7  -3  13 175.522 18.7147   1
  -7   3  12 645.248 21.9805   1
   7   3  11 708.887 25.1746  -2
  -7  -3  12 708.887 25.1746   1
  -7   3  11 6.03298 7.88092   1
   7   3  10 59.1244 14.7603  -2
  -7  -3  11 59.1244 14.7603   1
  -7   3  10 556.020 18.0732   1
   7   3   9 714.585 22.8164  -2
  -7  -3  10 714.585 22.8164   1
  -7   3   9 5.18584 4.19726   1
   7   3   8 25.5527 14.7384  -2
  -7  -3   9 25.5527 14.7384   1
  -7  -3   8 357.681 6.29296   1
   7   3   7 645.358 16.4594  -2
  -7  -3   8 645.358 16.4594   1
  -7   3   7 91.1440 4.05855   1
  -7   3  -6 136.165 10.3533  -2
   7  -3  -7 136.165 10.3533   1
  -7  -3   6 391.380 10.4894   1
  -7   3  -5 418.231 13.3846  -2
   7  -3  -6 418.231 13.3846   1
  -7  -3   5 234.655 7.56473   1
  -7  -3  -4 723.406 19.2644  -2
   7   3  -5 723.406 19.2644   1
  -7  -3   4 165.355 7.98053   1
  -7   3  -3 163.424 9.58577  -2
   7  -3  -4 163.424 9.58577   1
  -7  -3   3 537.337 12.5334   1
  -7   3  -2 772.227 16.9335  -2
   7  -3  -3 772.227 16.9335   1
  -7  -3   2 206.310 6.01737   1
  -7  -3  -1 329.331 14.1110  -2
   7   3  -2 329.331 14.1110   1
   7  -3  -1 108.101 3.89425   1
   7   3   0 2541.40 13.5941   1
  -7   3  -1 176.870 4.33129   1
   7   3   2 641.489 9.05476   1
  -7   3  -3 13.4543 3.47512   1
  -7  -3  -4 1229.04 13.9570   1
  -7  -3  -5 84.8404 5.83961   1
   7   3   6 98.6216 10.2501   1
  -7  -3  -7 374.216 12.6931   1
   7   3   8 2.48909 4.74511   1
   7   3   9 219.340 8.71423   1
  -7   3  10 430.923 34.0942  -2
   7  -3   9 430.923 34.0942   1
   7   3  10 118.763 7.47860   1
   7   3 -11 113.604 17.1296  -2
  -7  -3 -10 113.604 17.1296   1
   7  -3  11 35.2073 7.28957   1
  -7  -3  12 195.569 15.4178  -2
   7   3  11 195.569 15.4178   1
   7  -3  12 330.079 22.3935   1
   7  -3 -13 312.597 16.3677  -2
  -7   3 -12 312.597 16.3677   1
   7  -3  13 7.29600 10.3626   1
   7  -3 -14 4.85943 14.6660  -2
  -7   3 -13 4.85943 14.6660   1
   7   3  14 182.702 16.3185   1
   7  -3 -15 178.087 20.0731  -2
  -7   3 -14 178.087 20.0731   1
   7  -3  15-11.6969 11.3557   1
   7  -3 -16 15.9026 16.3026  -2
  -7   3 -15 15.9026 16.3026   1
  -7   4  16 163.084 33.5038   1
   7   4  15 157.002 27.0135  -2
  -7  -4  16 157.002 27.0135   1
  -7   4  15-14.3011 23.1900   1
   7   4  14 18.1966 18.0206  -2
  -7  -4  15 18.1966 18.0206   1
  -7   4  14 39.5140 27.3190   1
   7   4  13 102.057 18.9262  -2
  -7  -4  14 102.057 18.9262   1
   7   4  12 155.312 16.2565  -2
  -7  -4  13 155.312 16.2565   1
  -7   4  12 122.877 12.0423   1
   7   4  11 146.473 17.9236  -2
  -7  -4  12 146.473 17.9236   1
  -7   4  11 156.167 12.1598   1
   7   4  10 438.225 20.6038  -2
  -7  -4  11 438.225 20.6038   1
  -7   4  10 137.466 10.5164   1
   7   4   9 162.244 15.8186  -2
  -7  -4  10 162.244 15.8186   1
  -7   4   9 354.533 13.2103   1
   7   4   8 505.986 19.5980  -2
  -7  -4   9 505.986 19.5980   1
  -7   4   8 85.3055 6.78009   1
   7   4   7 116.006 16.0241  -2
  -7  -4   8 116.006 16.0241   1
  -7   4   7 38.3314 3.66810   1
  -7  -4  -6 267.647 12.4915  -2
   7   4  -7 267.647 12.4915   1
  -7  -4   6 962.086 22.3319   1
  -7   4  -5 964.524 18.8820  -2
   7  -4  -6 964.524 18.8820   1
  -7   4   5 21.9021 6.63558   1
  -7   4  -4 56.4310 8.37298  -2
   7  -4  -5 56.4310 8.37298   1
  -7  -4   4 363.971 13.6115   1
   7   4   3 623.886 13.1654  -2
  -7  -4   4 623.886 13.1654   1
   7  -4  -3 37.9261 5.21672   1
  -7  -4  -2 66.9713 10.1481  -2
   7   4  -3 66.9713 10.1481   1
  -7  -4   2 1254.89 14.4872   1
  -7  -4  -1 1699.91 26.7808  -2
   7   4  -2 1699.91 26.7808   1
   7   4  -1 112.648 4.45628   1
  -7  -4   0 199.956 12.4737  -2
   7   4  -1 199.956 12.4737   1
   7   4   0 213.147 4.80708   1
   7  -4   1 627.283 7.83573   1
   7  -4   2 67.4987 3.60010   1
   7   4   3 789.990 11.8240   1
  -7  -4  -4 32.4050 4.39386   1
   7   4   5 54.3915 4.82889   1
   7   4   6 713.454 21.0464   1
   7   4   7 35.5330 7.06245   1
  -7   4   8 79.5753 20.7866  -2
   7  -4   7 79.5753 20.7866   1
  -7   4  -8 224.153 10.1198   1
   7   4   9 33.3264 7.12477   1
  -7   4  10 107.009 17.9065  -2
   7  -4   9 107.009 17.9065   1
   7   4  10 636.337 14.1978   1
  -7   4  11 691.279 43.0277  -2
   7  -4  10 691.279 43.0277   1
   7  -4  11 50.4400 7.64879   1
   7  -4 -12 87.0924 12.6180  -2
  -7   4 -11 87.0924 12.6180   1
   7  -4  12 17.2527 18.9531   1
   7   4 -13 70.7030 11.9536  -2
  -7  -4 -12 70.7030 11.9536   1
   7   4  13 156.603 14.8245   1
   7  -4 -14 132.225 16.9162  -2
  -7   4 -13 132.225 16.9162   1
   7  -4  14 18.7053 16.5673   1
   7  -4 -15 20.3965 11.8487  -2
  -7   4 -14 20.3965 11.8487   1
   7  -4  15 67.9019 24.8241   1
  -7  -4  16 32.2947 31.7888  -2
   7   4  15 32.2947 31.7888   1
   7   4  16 2.73949 24.7244   1
  -7   5  16 72.1659 28.3668   1
   7   5  14 212.695 19.2500  -2
  -7  -5  15 212.695 19.2500   1
  -7   5  14 34.8690 24.0963   1
   7   5  13 84.6186 19.4555  -2
  -7  -5  14 84.6186 19.4555   1
  -7   5  13 10.4803 20.5994   1
   7   5  12 94.9734 18.0436  -2
  -7  -5  13 94.9734 18.0436   1
  -7   5  12 355.544 16.7043   1
   7   5  11 438.502 21.7871  -2
  -7  -5  12 438.502 21.7871   1
  -7   5  11 8.42131 8.07629   1
   7   5  10 44.3735 14.7886  -2
  -7  -5  11 44.3735 14.7886   1
  -7   5  10 307.654 12.6315   1
   7   5   9 413.948 22.6182  -2
  -7  -5  10 413.948 22.6182   1
  -7   5   9 58.4011 7.63097   1
   7   5   8 76.6684 15.5741  -2
  -7  -5   9 76.6684 15.5741   1
  -7   5   8 266.933 10.0802   1
  -7   5   7 463.720 10.7295   1
   7   5   6 614.820 20.9749  -2
  -7  -5   7 614.820 20.9749   1
  -7  -5   6 69.6505 10.5830   1
   7   5   5 109.213 8.71013  -2
  -7  -5   6 109.213 8.71013   1
  -7   5   5 667.279 17.2127   1
   7   5   4 1084.16 15.8517  -2
  -7  -5   5 1084.16 15.8517   1
  -7   5   4 265.461 8.99530   1
  -7  -5  -3 283.945 14.1035  -2
   7   5  -4 283.945 14.1035   1
  -7   5   3 884.452 20.7413   1
   7   5   2 1026.62 17.3335  -2
  -7  -5   3 1026.62 17.3335   1
  -7  -5   2 22.2727 4.09354   1
  -7  -5  -1 71.7241 10.3038  -2
   7   5  -2 71.7241 10.3038   1
   7   5  -1 67.8005 3.42673   1
  -7  -5   0 400.008 14.8461  -2
   7   5  -1 400.008 14.8461   1
   7   5   0 839.545 9.74307   1
   7  -5   1 36.5841 3.40013   1
   7  -5   2 209.717 6.28475   1
   7  -5   3 86.3107 4.53451   1
   7   5   4 1043.44 15.0411   1
  -7   5  -5 69.3261 9.46820   1
   7   5   6 54.2338 9.32085   1
   7   5  -7 160.445 30.9889  -2
  -7  -5  -6 160.445 30.9889   1
   7   5   7 319.395 14.2671   1
  -7   5   8 557.322 23.9798  -2
   7  -5   7 557.322 23.9798   1
   7   5   8-0.88838 8.05568   1
  -7  -5   9 4.50531 16.2167  -2
   7   5   8 4.50531 16.2167   1
   7   5   9 290.333 17.8226   1
  -7   5  10 398.807 21.3229  -2
   7  -5   9 398.807 21.3229   1
   7   5  10 50.8780 6.66086   1
  -7  -5  11 59.4450 29.1320  -2
   7   5  10 59.4450 29.1320   1
   7  -5  11 124.762 10.0939   1
  -7  -5  12 187.538 19.7281  -2
   7   5  11 187.538 19.7281   1
  -7  -5 -12 138.725 20.5294   1
   7  -5 -13 123.173 16.6357  -2
  -7   5 -12 123.173 16.6357   1
   7  -5  13 49.8388 12.1823   1
   7  -5 -14 60.2073 16.1326  -2
  -7   5 -13 60.2073 16.1326   1
   7  -5  14 97.0239 25.4776   1
   7  -5 -15 108.871 17.1029  -2
  -7   5 -14 108.871 17.1029   1
  -7   5  16 51.5335 30.2566  -2
   7  -5  15 51.5335 30.2566   1
  -7   6  16 35.5029 25.9770   1
   7   6  14 14.9128 15.9957  -2
  -7  -6  15 14.9128 15.9957   1
  -7   6  14 21.1881 22.2722   1
   7   6  13 112.983 19.8860  -2
  -7  -6  14 112.983 19.8860   1
  -7   6  13 161.159 29.4519   1
   7   6  12 179.144 19.4503  -2
  -7  -6  13 179.144 19.4503   1
   7   6  11 39.9324 13.9358  -2
  -7  -6  12 39.9324 13.9358   1
  -7   6  11 155.542 12.2028   1
   7   6  10 305.049 18.6130  -2
  -7  -6  11 305.049 18.6130   1
  -7   6  10 99.8771 9.71009   1
   7   6   9 164.503 18.5724  -2
  -7  -6  10 164.503 18.5724   1
  -7   6   9 650.281 16.8947   1
  -7   6   8 10.2058 6.07475   1
   7   6   7 70.7356 15.5289  -2
  -7  -6   8 70.7356 15.5289   1
  -7   6   7 64.1375 6.39172   1
   7   6   6 193.169 15.4150  -2
  -7  -6   7 193.169 15.4150   1
  -7   6   6 579.846 17.2062   1
  -7   6  -5 676.650 16.9959  -2
   7  -6  -6 676.650 16.9959   1
  -7  -6   5 37.8015 9.83355   1
  -7  -6  -4 65.6047 7.97606  -2
   7   6  -5 65.6047 7.97606   1
  -7   6   4 285.622 10.7677   1
  -7  -6  -3 601.608 17.9610  -2
   7   6  -4 601.608 17.9610   1
  -7   6   3 83.7520 9.47259   1
  -7   6  -2 50.5922 6.59222  -2
   7  -6  -3 50.5922 6.59222   1
   7  -6  -2 207.681 6.88980   1
  -7  -6  -1 559.538 16.8071  -2
   7   6  -2 559.538 16.8071   1
   7   6  -1 208.240 6.11737   1
  -7  -6   0 245.378 13.3549  -2
   7   6  -1 245.378 13.3549   1
   7   6   0 16.7374 3.66427   1
   7   6  -1 59.1693 16.8852  -2
  -7  -6   0 59.1693 16.8852   1
   7   6   1 597.313 9.66263   1
   7  -6   2 10.7379 3.55029   1
   7  -6   3 668.805 11.9500   1
   7   6  -4 876.652 41.8977  -2
  -7  -6  -3 876.652 41.8977   1
  -7   6  -4 104.687 6.67074   1
   7   6   5 225.002 12.3904   1
   7   6   6 394.058 13.5618   1
   7   6   7 120.229 14.0828   1
  -7  -6   8 135.605 15.0696  -2
   7   6   7 135.605 15.0696   1
   7   6   8 31.8105 10.4924   1
  -7  -6   9 235.578 20.1147  -2
   7   6   8 235.578 20.1147   1
   7   6   9 99.3572 10.3459   1
  -7   6  10 112.757 19.2299  -2
   7  -6   9 112.757 19.2299   1
   7   6  10 295.676 13.6589   1
  -7   6  11 374.861 25.9607  -2
   7  -6  10 374.861 25.9607   1
  -7  -6  12 67.3488 15.8841  -2
   7   6  11 67.3488 15.8841   1
  -7  -6 -12-4.23156 24.6381   1
  -7  -6  13 50.9598 32.5608  -2
   7   6  12 50.9598 32.5608   1
  -7  -6 -13 272.715 25.9161   1
  -7  -6  14 142.304 30.5233  -2
   7   6  13 142.304 30.5233   1
   7  -6  14-7.24432 16.9081   1
   7  -6 -15 14.5308 14.8940  -2
  -7   6 -14 14.5308 14.8940   1
  -7  -6  16-2.88390 38.0258  -2
   7   6  15-2.88390 38.0258   1
  -7   7  15 196.314 33.2577   1
   7   7  14 208.703 25.7140  -2
  -7  -7  15 208.703 25.7140   1
  -7  -7 -13 31.0495 14.3191  -2
   7   7 -14 31.0495 14.3191   1
  -7   7  13 40.2731 24.0976   1
   7   7  12 108.219 18.4668  -2
  -7  -7  13 108.219 18.4668   1
   7   7  11 178.998 17.7672  -2
  -7  -7  12 178.998 17.7672   1
  -7   7  11-1.79139 18.3217   1
   7   7  10 15.5989 14.1846  -2
  -7  -7  11 15.5989 14.1846   1
  -7   7  10 74.8898 9.64464   1
   7   7   9 219.010 37.1707  -2
  -7  -7  10 219.010 37.1707   1
  -7   7   9 55.7509 8.94459   1
   7   7   8 71.3251 14.3884  -2
  -7  -7   9 71.3251 14.3884   1
  -7   7   8 44.1115 6.56106   1
   7   7   7 171.628 23.1427  -2
  -7  -7   8 171.628 23.1427   1
  -7   7   7 218.743 9.72453   1
   7   7   6 308.869 18.9087  -2
  -7  -7   7 308.869 18.9087   1
  -7  -7   6 26.2799 10.5691   1
   7   7   5 86.5668 11.0022  -2
  -7  -7   6 86.5668 11.0022   1
  -7  -7   5 451.247 15.7725   1
  -7   7  -4 600.422 16.0006  -2
   7  -7  -5 600.422 16.0006   1
  -7   7   4 29.1332 8.82117   1
  -7  -7  -3 123.113 8.97851  -2
   7   7  -4 123.113 8.97851   1
  -7   7   3 1580.12 29.9370   1
  -7   7  -2 1698.05 23.9774  -2
   7  -7  -3 1698.05 23.9774   1
  -7   7   2 5.79601 16.1569   1
  -7   7  -1 45.1906 8.39652  -2
   7  -7  -2 45.1906 8.39652   1
   7   7  -1 262.410 14.6860   1
  -7  -7   0 445.973 13.9637  -2
   7   7  -1 445.973 13.9637   1
   7   7   0 226.768 7.94643   1
  -7  -7   1 378.626 14.9671  -2
   7   7   0 378.626 14.9671   1
   7   7   1 122.830 7.67090   1
   7   7   2 197.135 11.3098   1
   7   7   3 202.924 11.1435   1
   7   7  -4 244.548 28.0242  -2
  -7  -7  -3 244.548 28.0242   1
   7   7   4 516.539 14.5871   1
   7   7   5 178.113 15.8011   1
   7   7  -6 288.353 34.1877  -2
  -7  -7  -5 288.353 34.1877   1
   7   7   6 13.0476 16.2326   1
  -7  -7   7 76.3012 11.3053  -2
   7   7   6 76.3012 11.3053   1
   7   7   7 569.564 18.5482   1
  -7   7   8 654.961 35.8337  -2
   7  -7   7 654.961 35.8337   1
   7   7   8 25.8907 10.6423   1
  -7   7   9 34.2746 12.4189  -2
   7  -7   8 34.2746 12.4189   1
   7   7   9 514.929 21.7356   1
  -7  -7  10 490.866 20.1489  -2
   7   7   9 490.866 20.1489   1
   7   7  10 24.2923 10.1358   1
   7   7 -11 14.4465 13.6252  -2
  -7  -7 -10 14.4465 13.6252   1
   7  -7  11 105.021 19.3310   1
  -7  -7  12 157.474 33.4319  -2
   7   7  11 157.474 33.4319   1
   7   7  12 32.4628 35.5436   1
   7   7 -13 38.4946 24.2352  -2
  -7  -7 -12 38.4946 24.2352   1
  -7  -7  14 40.8308 22.4815  -2
   7   7  13 40.8308 22.4815   1
  -7  -7  15 0.02353 43.4121  -2
   7   7  14 0.02353 43.4121   1
  -7   8  15 26.2492 25.1021   1
   7   8  14 24.4885 28.8070  -2
  -7  -8  15 24.4885 28.8070   1
  -7   8  14 10.4103 22.4824   1
  -7  -8 -13 99.5214 19.0250  -2
   7   8 -14 99.5214 19.0250   1
  -7  -8 -12 260.712 18.2255  -2
   7   8 -13 260.712 18.2255   1
  -7  -8 -11 26.5139 14.1014  -2
   7   8 -12 26.5139 14.1014   1
  -7  -8  11 175.669 32.8770   1
  -7  -8 -10 181.048 26.1565  -2
   7   8 -11 181.048 26.1565   1
  -7  -8  10 53.3112 25.4819   1
   7   8   9 53.0995 17.9744  -2
  -7  -8  10 53.0995 17.9744   1
  -7   8   9 453.250 16.2384   1
   7   8   8 564.087 35.5029  -2
  -7  -8   9 564.087 35.5029   1
  -7   8   8 13.2141 6.12408   1
   7   8   7 67.5758 22.0175  -2
  -7  -8   8 67.5758 22.0175   1
  -7   8   7 23.4152 6.15255   1
   7   8   6 55.5441 14.5488  -2
  -7  -8   7 55.5441 14.5488   1
   7   8  -6 99.0787 11.1478   1
   7   8   5 263.719 18.8359  -2
  -7  -8   6 263.719 18.8359   1
  -7   8   5 22.1031 10.1260   1
   7   8   4 47.0201 8.60344  -2
  -7  -8   5 47.0201 8.60344   1
  -7   8   4 39.3442 8.50693   1
  -7   8  -3 321.521 14.2732  -2
   7  -8  -4 321.521 14.2732   1
  -7   8   3 258.068 18.1388   1
  -7   8  -2 284.604 12.5890  -2
   7  -8  -3 284.604 12.5890   1
  -7   8   2 44.9053 11.8687   1
   7   8   1 185.039 10.8630  -2
  -7  -8   2 185.039 10.8630   1
   7   8  -1 195.543 11.6765   1
  -7  -8   0 354.289 13.2243  -2
   7   8  -1 354.289 13.2243   1
   7  -8   0 37.0346 6.95352   1
  -7  -8   1 116.080 11.4439  -2
   7   8   0 116.080 11.4439   1
   7   8   1 304.272 8.78573   1
  -7  -8   2 410.490 18.1986  -2
   7   8   1 410.490 18.1986   1
   7   8   2 26.3945 8.90394   1
   7   8  -3 84.2855 23.7782  -2
  -7  -8  -2 84.2855 23.7782   1
   7   8   3 852.656 20.4386   1
   7   8   4 12.2916 7.54823   1
   7   8   5 136.684 7.15453   1
  -7   8   6 218.386 16.7689  -2
   7  -8   5 218.386 16.7689   1
   7   8   6 64.5810 13.8899   1
  -7  -8   7 59.6225 12.9429  -2
   7   8   6 59.6225 12.9429   1
   7   8   7 68.5757 13.6117   1
  -7  -8   8 107.316 13.0557  -2
   7   8   7 107.316 13.0557   1
   7   8   8 7.12766 10.5723   1
  -7  -8   9 122.178 14.9736  -2
   7   8   8 122.178 14.9736   1
   7   8   9 59.1870 12.2547   1
   7   8 -10 32.4373 13.9011  -2
  -7  -8  -9 32.4373 13.9011   1
   7   8  10 52.9548 11.4214   1
  -7   8  11 71.8615 19.1360  -2
   7  -8  10 71.8615 19.1360   1
   7  -8  11 62.4275 22.7468   1
  -7  -8  12 89.4324 22.5327  -2
   7   8  11 89.4324 22.5327   1
   7  -8  12 2.25782 19.5186   1
  -7  -8  13 71.3217 22.7725  -2
   7   8  12 71.3217 22.7725   1
  -7  -8  14 170.121 52.9029  -2
   7   8  13 170.121 52.9029   1
  -7   9  14-2.57245 21.9162   1
   7  -9  13 55.3863 33.3028  -2
  -7   9  14 55.3863 33.3028   1
  -7  -9 -12 17.4559 16.4453  -2
   7   9 -13 17.4559 16.4453   1
  -7  -9  12 48.3036 28.6443   1
  -7  -9 -11 55.7376 22.8642  -2
   7   9 -12 55.7376 22.8642   1
  -7  -9  11 16.1148 16.3157   1
  -7  -9 -10 40.7339 20.8852  -2
   7   9 -11 40.7339 20.8852   1
  -7  -9  10 28.9366 16.2147   1
  -7  -9  -9 36.9362 20.0948  -2
   7   9 -10 36.9362 20.0948   1
  -7  -9   9 39.3591 15.3425   1
  -7  -9  -8 44.0491 19.8312  -2
   7   9  -9 44.0491 19.8312   1
  -7  -9   8 14.3235 14.7113   1
  -7  -9  -7 72.9415 11.6354  -2
   7   9  -8 72.9415 11.6354   1
   7   9  -7 308.234 16.3197   1
   7   9   6 415.544 23.0169  -2
  -7  -9   7 415.544 23.0169   1
   7   9  -6-2.59604 9.23875   1
   7   9   5 44.4621 15.0147  -2
  -7  -9   6 44.4621 15.0147   1
   7   9  -5 306.465 14.0178   1
   7   9   4 596.902 36.3481  -2
  -7  -9   5 596.902 36.3481   1
  -7   9   4 4.69349 9.71769   1
   7   9   3 35.3684 9.36328  -2
  -7  -9   4 35.3684 9.36328   1
  -7   9   3 493.809 19.3546   1
   7   9   2 941.200 20.0390  -2
  -7  -9   3 941.200 20.0390   1
  -7  -9   2 3.32586 10.0104   1
  -7   9  -1 36.4662 8.86066  -2
   7  -9  -2 36.4662 8.86066   1
   7   9  -1 26.8415 12.4627   1
  -7  -9   0 117.275 9.24805  -2
   7   9  -1 117.275 9.24805   1
   7   9   0 143.413 12.0204   1
  -7  -9   1 184.951 11.3363  -2
   7   9   0 184.951 11.3363   1
   7   9   1 132.722 16.8037   1
  -7  -9   2 133.202 9.31755  -2
   7   9   1 133.202 9.31755   1
   7  -9   2 0.47127 12.3599   1
  -7  -9   3 222.310 17.6257  -2
   7   9   2 222.310 17.6257   1
   7   9   3 91.2532 12.5922   1
  -7  -9   4 139.604 19.1753  -2
   7   9   3 139.604 19.1753   1
   7   9   4 48.6630 13.5308   1
  -7  -9   5 226.189 14.7969  -2
   7   9   4 226.189 14.7969   1
   7   9   5 158.323 17.2282   1
  -7  -9   6 162.199 10.9764  -2
   7   9   5 162.199 10.9764   1
   7   9   6 14.4363 10.3982   1
  -7  -9   7 117.238 13.4338  -2
   7   9   6 117.238 13.4338   1
   7   9   7 371.136 22.0564   1
  -7   9   8 425.699 17.8808  -2
   7  -9   7 425.699 17.8808   1
   7  -9   8 9.80085 10.9673   1
  -7  -9   9 8.53907 12.2226  -2
   7   9   8 8.53907 12.2226   1
   7   9   9 259.950 17.4996   1
  -7  -9  10 257.845 18.0863  -2
   7   9   9 257.845 18.0863   1
   7   9  10-6.24762 10.4103   1
  -7  -9  11-35.9761 25.7866  -2
   7   9  10-35.9761 25.7866   1
   7  -9  11 102.170 25.6657   1
  -7  -9  12 97.6192 30.0460  -2
   7   9  11 97.6192 30.0460   1
  -7  -9  13-10.0016 28.6944  -2
   7   9  12-10.0016 28.6944   1
  -7 -10 -12 191.254 26.8326  -2
   7  10 -13 191.254 26.8326   1
  -7 -10 -11 36.6953 17.4189  -2
   7  10 -12 36.6953 17.4189   1
  -7 -10  11 155.489 21.7616   1
  -7 -10 -10 138.327 23.7793  -2
   7  10 -11 138.327 23.7793   1
  -7 -10  10 10.7202 24.3759   1
  -7 -10  -9 63.5387 17.1812  -2
   7  10 -10 63.5387 17.1812   1
  -7 -10   9 399.200 26.2248   1
  -7 -10  -8 478.000 30.6396  -2
   7  10  -9 478.000 30.6396   1
  -7 -10   8 0.27080 14.2415   1
  -7 -10  -7 17.9398 18.9884  -2
   7  10  -8 17.9398 18.9884   1
   7  10  -7 25.8304 9.90621   1
   7  10   6 37.8308 16.3619  -2
  -7 -10   7 37.8308 16.3619   1
   7  10  -6-1.26426 9.58390   1
   7  10   5 35.3847 22.5842  -2
  -7 -10   6 35.3847 22.5842   1
   7  10  -5 36.1531 10.8139   1
   7  10   4 72.8414 24.9224  -2
  -7 -10   5 72.8414 24.9224   1
  -7  10   4 20.8177 10.4602   1
   7  10   3 180.682 27.5544  -2
  -7 -10   4 180.682 27.5544   1
   7  10  -3 77.0634 14.5398   1
  -7  10  -2 107.005 9.56025  -2
   7 -10  -3 107.005 9.56025   1
   7  10  -2-3.37817 25.0265   1
  -7  10  -1 162.891 9.79782  -2
   7 -10  -2 162.891 9.79782   1
   7  10  -1 44.5935 29.9307   1
   7  10   0 273.094 11.8324  -2
  -7 -10   1 273.094 11.8324   1
   7 -10   0 8.30027 11.6647   1
  -7 -10   1 74.4628 8.33722  -2
   7  10   0 74.4628 8.33722   1
   7  10   1 322.321 22.2846   1
  -7 -10   2 524.287 13.6786  -2
   7  10   1 524.287 13.6786   1
   7  10   2-0.37204 8.29975   1
  -7 -10   3 34.5055 8.92707  -2
   7  10   2 34.5055 8.92707   1
   7  10   3 522.137 17.1679   1
  -7 -10   4 768.396 25.2139  -2
   7  10   3 768.396 25.2139   1
   7  10   4-1.91072 10.9041   1
  -7 -10   5 23.6078 8.93161  -2
   7  10   4 23.6078 8.93161   1
   7  10   5 109.748 11.6610   1
  -7 -10   6 162.319 12.5905  -2
   7  10   5 162.319 12.5905   1
   7  10   6 13.3188 12.3005   1
  -7  10   7 13.0416 10.7167  -2
   7 -10   6 13.0416 10.7167   1
   7  10   7 75.5380 14.7231   1
  -7 -10   8 59.1130 13.1341  -2
   7  10   7 59.1130 13.1341   1
   7  10   8 6.32698 10.9394   1
  -7  10   9 96.8237 15.0205  -2
   7 -10   8 96.8237 15.0205   1
   7  10   9 52.3663 12.5391   1
  -7 -10  10 96.1145 29.9092  -2
   7  10   9 96.1145 29.9092   1
   7 -10  10 5.72508 12.4445   1
  -7 -10  11 2.65639 26.2304  -2
   7  10  10 2.65639 26.2304   1
   7 -10  11 47.0861 23.3614   1
  -7 -10  12 69.9092 28.3469  -2
   7  10  11 69.9092 28.3469   1
  -7 -11 -11-16.6833 32.2166  -2
   7  11 -12-16.6833 32.2166   1
  -7 -11 -10 5.07436 16.5155  -2
   7  11 -11 5.07436 16.5155   1
  -7 -11  10 8.22027 26.7946   1
   7 -11   9 38.3038 17.2419  -2
  -7  11  10 38.3038 17.2419   1
  -7 -11   9 37.2505 17.9134   1
  -7 -11  -8 123.905 24.6554  -2
   7  11  -9 123.905 24.6554   1
  -7 -11   8 47.1205 26.0857   1
  -7 -11  -7 44.9010 14.2315  -2
   7  11  -8 44.9010 14.2315   1
  -7 -11   7 232.264 21.7693   1
  -7 -11  -6 371.066 29.6711  -2
   7  11  -7 371.066 29.6711   1
   7  11  -6 12.2504 10.1493   1
   7  11   5 34.8267 25.0426  -2
  -7 -11   6 34.8267 25.0426   1
   7  11  -5 255.507 19.2403   1
   7  11   4 276.987 33.9512  -2
  -7 -11   5 276.987 33.9512   1
   7  11  -4 23.8465 13.0958   1
   7  11   3 52.5934 17.0178  -2
  -7 -11   4 52.5934 17.0178   1
   7  11  -3 353.047 21.8221   1
   7  11   2 429.670 24.8462  -2
  -7 -11   3 429.670 24.8462   1
   7  11  -2 8.83488 13.5925   1
   7  11   1 18.5828 12.5104  -2
  -7 -11   2 18.5828 12.5104   1
   7  11  -1 67.6039 12.5514   1
   7  11   0 67.3937 11.5009  -2
  -7 -11   1 67.3937 11.5009   1
   7  11   0 10.5193 8.53226   1
  -7 -11   1 22.6912 10.0910  -2
   7  11   0 22.6912 10.0910   1
   7  11   1 91.0437 13.6672   1
  -7 -11   2 111.073 10.7307  -2
   7  11   1 111.073 10.7307   1
   7  11   2 14.0104 9.31174   1
  -7 -11   3 141.917 10.6266  -2
   7  11   2 141.917 10.6266   1
   7  11   3 78.9127 13.8740   1
  -7 -11   4 115.847 9.84671  -2
   7  11   3 115.847 9.84671   1
   7  11   4 17.3041 12.5291   1
   7  11  -5 85.1990 12.4604  -2
  -7 -11  -4 85.1990 12.4604   1
   7  11   5 56.0214 10.7188   1
  -7 -11   6 82.3890 14.8035  -2
   7  11   5 82.3890 14.8035   1
   7  11   6-4.21296 12.3035   1
  -7 -11   7 82.4186 15.8987  -2
   7  11   6 82.4186 15.8987   1
   7  11   7 261.502 20.7162   1
  -7 -11   8 328.889 32.7377  -2
   7  11   7 328.889 32.7377   1
   7 -11   8 22.2381 13.3693   1
  -7 -11   9 61.3710 26.2379  -2
   7  11   8 61.3710 26.2379   1
   7 -11   9 202.617 17.9456   1
  -7 -11  10 190.903 32.7967  -2
   7  11   9 190.903 32.7967   1
   7 -11  10-3.74247 12.7115   1
  -7 -12   9 164.567 34.5337   1
   7  12   8 179.994 26.4025  -2
  -7 -12   9 179.994 26.4025   1
  -7 -12   8 20.1418 25.0011   1
  -7 -12  -7 45.4072 22.6274  -2
   7  12  -8 45.4072 22.6274   1
   7  12  -7 21.1310 18.3118   1
   7  12   6-3.93456 25.5274  -2
  -7 -12   7-3.93456 25.5274   1
   7  12  -6 3.55453 11.3842   1
   7  12   5 27.1226 19.1100  -2
  -7 -12   6 27.1226 19.1100   1
   7  12  -5 20.5339 12.4261   1
   7  12   4-0.19586 17.2698  -2
  -7 -12   5-0.19586 17.2698   1
   7  12  -4 48.9647 13.9975   1
   7  12   3 123.175 19.8307  -2
  -7 -12   4 123.175 19.8307   1
   7  12  -3 85.2058 21.1225   1
   7  12   2 95.4586 19.2072  -2
  -7 -12   3 95.4586 19.2072   1
   7  12  -2 22.4796 14.4839   1
   7  12   1 83.0089 27.2384  -2
  -7 -12   2 83.0089 27.2384   1
   7  12  -1 81.6586 13.7540   1
   7  12   0 140.721 19.6737  -2
  -7 -12   1 140.721 19.6737   1
   7  12   0 31.4071 11.3947   1
   7  12  -1 79.4616 18.0718  -2
  -7 -12   0 79.4616 18.0718   1
   7  12   1 213.246 13.9629   1
  -7 -12   2 180.375 19.4843  -2
   7  12   1 180.375 19.4843   1
   7  12   2-10.1151 10.3132   1
  -7 -12   3 14.4719 13.1235  -2
   7  12   2 14.4719 13.1235   1
   7  12   3 238.827 18.2720   1
  -7 -12   4 220.646 17.6609  -2
   7  12   3 220.646 17.6609   1
   7  12   4 1.13482 11.8735   1
  -7 -12   5 14.4548 13.8340  -2
   7  12   4 14.4548 13.8340   1
   7  12   5 55.9907 14.1890   1
  -7 -12   6 35.9296 16.8485  -2
   7  12   5 35.9296 16.8485   1
   7 -12   6-5.32838 11.5261   1
  -7 -12   7 58.3634 23.2609  -2
   7  12   6 58.3634 23.2609   1
   7 -12   7 79.2787 16.4414   1
  -7 -12   8 93.7216 26.3758  -2
   7  12   7 93.7216 26.3758   1
   7 -12   8 0.31712 12.8412   1
  -7 -12   9 94.0599 27.0935  -2
   7  12   8 94.0599 27.0935   1
   7  12   9 14.6549 18.8928   1
  -7 -13   7 125.357 29.4572   1
   7  13   6 107.403 31.5078  -2
  -7 -13   7 107.403 31.5078   1
   7  13  -6 32.0411 18.1550   1
   7  13   5 36.9933 19.5165  -2
  -7 -13   6 36.9933 19.5165   1
   7  13  -5 147.395 17.1909   1
   7  13   4 125.478 21.1404  -2
  -7 -13   5 125.478 21.1404   1
   7  13  -4 5.65961 12.5402   1
   7  13   3 18.0034 17.5521  -2
  -7 -13   4 18.0034 17.5521   1
   7  13  -3 238.834 19.2019   1
   7  13   2 248.717 35.3157  -2
  -7 -13   3 248.717 35.3157   1
   7  13  -2 5.83913 23.4937   1
   7  13   1 53.1185 18.6219  -2
  -7 -13   2 53.1185 18.6219   1
   7  13  -1 52.2222 28.7742   1
   7  13   0 32.2301 17.5481  -2
  -7 -13   1 32.2301 17.5481   1
   7  13   0 22.7405 20.1221   1
   7  13  -1 74.3957 18.9076  -2
  -7 -13   0 74.3957 18.9076   1
   7 -13   1 26.0501 11.7070   1
  -7 -13   2 44.7066 14.4200  -2
   7  13   1 44.7066 14.4200   1
   7 -13   2 37.8833 10.5537   1
  -7 -13   3 94.1942 19.6362  -2
   7  13   2 94.1942 19.6362   1
   7 -13   3 43.1615 10.4388   1
  -7 -13   4 48.0554 23.7000  -2
   7  13   3 48.0554 23.7000   1
   7 -13   4-1.72086 12.0052   1
  -7 -13   5 69.2257 18.1026  -2
   7  13   4 69.2257 18.1026   1
   7 -13   5 38.1583 11.2489   1
  -7 -13   6 3.17772 25.9230  -2
   7  13   5 3.17772 25.9230   1
   7 -13   6 14.3519 14.6082   1
  -7 -13   7 26.3984 24.9080  -2
   7  13   6 26.3984 24.9080   1
   7 -13   7 112.501 18.0417   1
   7  13   8-2.14412 21.1626   1
   7  13   9 21.9978 20.4219   1
  -7 -14   6 63.5308 25.8986   1
  -7 -14   5-2.11142 20.4166   1
  -7 -14   4 30.9332 15.8363   1
   7  14  -3 25.4337 23.5281   1
   7  14   2 61.2572 20.4774  -2
  -7 -14   3 61.2572 20.4774   1
   7  14  -2 61.7102 26.5493   1
  -7  14  -1 153.538 22.5747  -2
   7 -14  -2 153.538 22.5747   1
   7  14  -1 86.9249 31.7415   1
  -7  14   0 143.841 21.6420  -2
   7 -14  -1 143.841 21.6420   1
   7  14   0 70.4739 16.1336   1
   7  14  -1 51.8780 28.7446  -2
  -7 -14   0 51.8780 28.7446   1
   7  14   1 100.572 17.3331   1
   7  14  -2 139.251 36.3940  -2
  -7 -14  -1 139.251 36.3940   1
   7  14   2 25.5304 21.8117   1
  -7 -14   3-0.19089 16.6391  -2
   7  14   2-0.19089 16.6391   1
   7  14   3 56.3107 30.7444   1
  -7 -14   4 70.5321 19.0579  -2
   7  14   3 70.5321 19.0579   1
   7 -14   4 1.58064 14.3596   1
  -7  14   5-23.5120 26.4031  -2
   7 -14   4-23.5120 26.4031   1
   7 -14   5 11.7614 17.2491   1
   7 -14   6 26.6791 19.5070   1
   7  15  -3 15.1990 25.2555   1
  -8   0  14 57.2682 24.5978   1
  -8   0  12 649.909 21.0317   1
  -8   0  10 441.958 16.5671   1
   8   0  -8 299.315 6.68309   1
   8   0  -6 82.2699 8.16533   1
  -8   0   4 201.453 9.15344   1
   8   0  -2 34.5931 8.30657   1
  -8   0   0 2434.20 37.0813   1
   8   0   2 786.946 12.8543   1
   8   0   4 1954.47 23.3216   1
   8   0   6 511.492 19.1045   1
  -8   0  -8 32.8874 11.2849   1
   8   0  10 176.564 14.4931   1
   8   0  12 330.114 16.2576   1
  -8   0 -14 196.409 21.2089   1
   8   1  14 6.82873 24.0647  -2
  -8  -1  15 6.82873 24.0647   1
   8   1  13 123.789 26.3362  -2
  -8  -1  14 123.789 26.3362   1
   8   1  12 34.2554 11.2497  -2
  -8  -1  13 34.2554 11.2497   1
  -8   1 -11 212.325 14.9008  -2
   8  -1 -12 212.325 14.9008   1
  -8   1 -10 144.227 9.34357  -2
   8  -1 -11 144.227 9.34357   1
  -8   1  10 38.0838 9.85736   1
  -8   1  -9 52.3453 7.53008  -2
   8  -1 -10 52.3453 7.53008   1
  -8   1   9 40.3225 5.38051   1
  -8   1  -8 94.2674 6.94620  -2
   8  -1  -9 94.2674 6.94620   1
  -8   1   8 33.1023 6.73205   1
  -8  -1  -7 24.5455 6.23646  -2
   8   1  -8 24.5455 6.23646   1
  -8  -1   7 1.71678 4.58723   1
  -8   1  -6 164.766 8.38378  -2
   8  -1  -7 164.766 8.38378   1
   8  -1   5 1446.79 15.2279  -2
  -8   1   6 1446.79 15.2279   1
   8  -1   4 33.5883 5.98618  -2
  -8   1   5 33.5883 5.98618   1
   8  -1   3 1052.63 15.4399  -2
  -8   1   4 1052.63 15.4399   1
  -8   1  -2 10.7605 4.54492  -2
   8  -1  -3 10.7605 4.54492   1
  -8   1  -1 1826.22 17.6481  -2
   8  -1  -2 1826.22 17.6481   1
  -8   1   1-5.30262 13.4574   1
  -8   1   0 59.7011 7.70051  -2
   8  -1  -1 59.7011 7.70051   1
   8   1   0 187.155 7.16663   1
   8  -1  -1 357.525 13.1286  -2
  -8   1   0 357.525 13.1286   1
   8   1   1 47.2496 3.79376   1
   8  -1  -2 344.744 14.2560  -2
  -8   1  -1 344.744 14.2560   1
   8   1   2 31.6438 3.67255   1
   8   1  -3 39.6274 6.76149  -2
  -8  -1  -2 39.6274 6.76149   1
   8   1   3 73.9624 5.15086   1
   8   1  -4 283.009 12.7998  -2
  -8  -1  -3 283.009 12.7998   1
   8   1   4 70.9555 6.35364   1
   8  -1  -5 72.1634 7.78823  -2
  -8   1  -4 72.1634 7.78823   1
  -8  -1  -5 23.4895 7.42662   1
  -8  -1   6 299.109 9.55466  -2
   8   1   5 299.109 9.55466   1
  -8  -1   7 859.600 17.6460  -2
   8   1   6 859.600 17.6460   1
  -8  -1   8 13.9968 8.08669  -2
   8   1   7 13.9968 8.08669   1
  -8   1  -8 330.303 21.6728   1
  -8   1   9 324.275 14.2034  -2
   8  -1   8 324.275 14.2034   1
   8   1 -10 31.6141 8.06600  -2
  -8  -1  -9 31.6141 8.06600   1
  -8   1 -10 767.119 20.0800   1
  -8  -1  11 751.853 30.4672  -2
   8   1  10 751.853 30.4672   1
  -8  -1 -11 12.2675 6.87106   1
  -8  -1  12 70.7319 18.6066  -2
   8   1  11 70.7319 18.6066   1
  -8   1  13 54.3895 19.6634  -2
   8  -1  12 54.3895 19.6634   1
  -8   1  14 36.1975 15.9097  -2
   8  -1  13 36.1975 15.9097   1
  -8  -1  15 58.1433 15.8386  -2
   8   1  14 58.1433 15.8386   1
  -8  -1  16 79.8670 17.0247  -2
   8   1  15 79.8670 17.0247   1
  -8  -1  17 66.0617 28.0428  -2
   8   1  16 66.0617 28.0428   1
   8   2  15 37.8073 35.9625  -2
  -8  -2  16 37.8073 35.9625   1
   8   2  14 68.0199 18.0205  -2
  -8  -2  15 68.0199 18.0205   1
   8   2  13 69.6663 12.6291  -2
  -8  -2  14 69.6663 12.6291   1
   8   2  12 152.104 12.2910  -2
  -8  -2  13 152.104 12.2910   1
   8   2  11 545.576 16.0129  -2
  -8  -2  12 545.576 16.0129   1
  -8   2 -10 46.0252 9.69558  -2
   8  -2 -11 46.0252 9.69558   1
  -8   2  -9 455.119 12.2985  -2
   8  -2 -10 455.119 12.2985   1
  -8   2   9 2.49879 5.04721   1
   8  -2   8 5.71690 6.29493  -2
  -8   2   9 5.71690 6.29493   1
   8   2   7 561.555 14.3125  -2
  -8  -2   8 561.555 14.3125   1
   8   2   6 53.2195 5.41892  -2
  -8  -2   7 53.2195 5.41892   1
   8   2   5 345.383 8.59549  -2
  -8  -2   6 345.383 8.59549   1
  -8   2  -4 227.463 11.0017  -2
   8  -2  -5 227.463 11.0017   1
   8  -2   3 78.5807 6.06381  -2
  -8   2   4 78.5807 6.06381   1
  -8  -2  -2 144.838 11.2205  -2
   8   2  -3 144.838 11.2205   1
  -8  -2  -1 246.988 9.59213  -2
   8   2  -2 246.988 9.59213   1
  -8   2   1 181.796 22.7849   1
  -8  -2   0 817.757 14.8474  -2
   8   2  -1 817.757 14.8474   1
   8   2   0 1695.07 21.2202   1
   8   2  -1 2337.12 30.2844  -2
  -8  -2   0 2337.12 30.2844   1
   8   2   1 82.0199 5.41099   1
   8   2  -2 121.547 9.65443  -2
  -8  -2  -1 121.547 9.65443   1
   8   2   2 988.149 12.6233   1
   8  -2  -3 1038.06 21.5945  -2
  -8   2  -2 1038.06 21.5945   1
   8   2   3 31.6731 5.15743   1
   8   2  -4 68.3527 7.20408  -2
  -8  -2  -3 68.3527 7.20408   1
   8  -2   4 1416.93 20.2510   1
  -8  -2   5 1584.05 21.5838  -2
   8   2   4 1584.05 21.5838   1
  -8  -2  -5 33.0744 7.11162   1
  -8  -2   6 83.3420 8.60887  -2
   8   2   5 83.3420 8.60887   1
  -8  -2   7 68.7269 8.98843  -2
   8   2   6 68.7269 8.98843   1
   8   2  -8 142.251 10.4535  -2
  -8  -2  -7 142.251 10.4535   1
  -8   2   9 15.8396 7.37673  -2
   8  -2   8 15.8396 7.37673   1
  -8  -2  -9 46.0244 11.6767   1
  -8  -2  10 160.913 11.8080  -2
   8   2   9 160.913 11.8080   1
  -8  -2 -10 76.6521 12.3692   1
  -8  -2  11 62.1448 8.55422  -2
   8   2  10 62.1448 8.55422   1
  -8  -2 -11 32.0251 10.6008   1
  -8  -2  12 124.705 16.0730  -2
   8   2  11 124.705 16.0730   1
  -8   2  13 364.078 23.4175  -2
   8  -2  12 364.078 23.4175   1
  -8   2  14 6.68087 13.8680  -2
   8  -2  13 6.68087 13.8680   1
  -8  -2  15 160.128 18.1735  -2
   8   2  14 160.128 18.1735   1
  -8   2  16 33.5168 21.2953  -2
   8  -2  15 33.5168 21.2953   1
   8   3  14 26.2445 16.8642  -2
  -8  -3  15 26.2445 16.8642   1
   8   3  13 142.749 18.7170  -2
  -8  -3  14 142.749 18.7170   1
   8   3  12 114.555 13.4623  -2
  -8  -3  13 114.555 13.4623   1
   8   3  11 201.184 13.0387  -2
  -8  -3  12 201.184 13.0387   1
   8   3  10 255.095 13.2065  -2
  -8  -3  11 255.095 13.2065   1
   8  -3   9 114.793 10.9247  -2
  -8   3  10 114.793 10.9247   1
   8   3   8 302.014 12.9111  -2
  -8  -3   9 302.014 12.9111   1
   8  -3   7 79.2632 9.94136  -2
  -8   3   8 79.2632 9.94136   1
   8  -3   6 270.723 10.5221  -2
  -8   3   7 270.723 10.5221   1
   8  -3   5 1133.41 14.3391  -2
  -8   3   6 1133.41 14.3391   1
   8   3   4 35.0438 5.41340  -2
  -8  -3   5 35.0438 5.41340   1
   8   3   3 562.141 11.5211  -2
  -8  -3   4 562.141 11.5211   1
  -8  -3  -2 229.059 7.77577  -2
   8   3  -3 229.059 7.77577   1
  -8  -3  -1 472.323 10.2204  -2
   8   3  -2 472.323 10.2204   1
  -8   3   1 256.822 26.0232   1
  -8  -3   0 328.442 9.60996  -2
   8   3  -1 328.442 9.60996   1
   8   3   0 150.343 9.67376   1
   8   3  -1 214.644 9.37589  -2
  -8  -3   0 214.644 9.37589   1
   8   3   1 61.5482 2.93360   1
   8  -3  -2 214.974 10.2577  -2
  -8   3  -1 214.974 10.2577   1
   8  -3   2 99.3853 6.04413   1
   8  -3  -3 167.652 8.78474  -2
  -8   3  -2 167.652 8.78474   1
   8  -3   3 129.647 7.12709   1
  -8  -3   4 294.982 10.9998  -2
   8   3   3 294.982 10.9998   1
  -8  -3  -4 4.86473 4.67782   1
   8  -3  -5 26.9078 7.40244  -2
  -8   3  -4 26.9078 7.40244   1
  -8  -3  -5 108.143 8.58199   1
  -8  -3   6 234.339 12.7279  -2
   8   3   5 234.339 12.7279   1
  -8  -3  -6 559.443 16.3041   1
  -8  -3   7 698.567 19.3745  -2
   8   3   6 698.567 19.3745   1
   8  -3  -8 48.9844 9.07734  -2
  -8   3  -7 48.9844 9.07734   1
  -8   3   9 311.991 11.3417  -2
   8  -3   8 311.991 11.3417   1
  -8  -3  10 36.1159 7.38523  -2
   8   3   9 36.1159 7.38523   1
  -8   3 -10 564.919 18.1006   1
  -8   3  11 570.399 16.4618  -2
   8  -3  10 570.399 16.4618   1
  -8  -3 -11 13.7068 9.45850   1
  -8  -3  12 40.2878 13.9959  -2
   8   3  11 40.2878 13.9959   1
  -8  -3  13 49.7430 13.4708  -2
   8   3  12 49.7430 13.4708   1
  -8   3  14 71.5168 15.7918  -2
   8  -3  13 71.5168 15.7918   1
  -8  -3  15 56.6102 16.0148  -2
   8   3  14 56.6102 16.0148   1
  -8   3  16 76.0734 22.6991  -2
   8  -3  15 76.0734 22.6991   1
   8   4  14 90.3706 21.3128  -2
  -8  -4  15 90.3706 21.3128   1
   8   4  13 77.0005 17.3437  -2
  -8  -4  14 77.0005 17.3437   1
   8   4  12 95.9756 16.6681  -2
  -8  -4  13 95.9756 16.6681   1
   8   4  11 493.958 17.0430  -2
  -8  -4  12 493.958 17.0430   1
   8  -4  10 55.9656 10.6517  -2
  -8   4  11 55.9656 10.6517   1
   8   4   9 346.715 17.4467  -2
  -8  -4  10 346.715 17.4467   1
   8   4   8 33.0542 9.23519  -2
  -8  -4   9 33.0542 9.23519   1
   8   4   7 295.539 13.7951  -2
  -8  -4   8 295.539 13.7951   1
   8  -4   6 143.536 9.21360  -2
  -8   4   7 143.536 9.21360   1
   8   4   5 188.500 9.42352  -2
  -8  -4   6 188.500 9.42352   1
   8  -4   4 209.008 9.24587  -2
  -8   4   5 209.008 9.24587   1
  -8  -4  -3 111.420 7.21738  -2
   8   4  -4 111.420 7.21738   1
  -8  -4  -2 687.178 12.0486  -2
   8   4  -3 687.178 12.0486   1
  -8  -4   2 117.944 8.23355   1
  -8  -4  -1 158.030 7.58369  -2
   8   4  -2 158.030 7.58369   1
  -8   4   1 210.337 10.5421   1
  -8  -4   0 580.656 13.3983  -2
   8   4  -1 580.656 13.3983   1
  -8  -4   1 1361.61 18.5503  -2
   8   4   0 1361.61 18.5503   1
   8  -4   1 38.7686 5.93258   1
  -8  -4   2 169.884 7.43530  -2
   8   4   1 169.884 7.43530   1
   8  -4   2 225.149 14.4881   1
  -8  -4   3 702.076 12.8866  -2
   8   4   2 702.076 12.8866   1
   8  -4   3 32.5142 7.15777   1
   8   4  -4 92.3191 8.66455  -2
  -8  -4  -3 92.3191 8.66455   1
  -8  -4  -4 796.661 20.6596   1
  -8  -4   5 897.043 22.4170  -2
   8   4   4 897.043 22.4170   1
  -8  -4  -5 68.2142 7.21078   1
   8   4  -6 139.882 12.9377  -2
  -8  -4  -5 139.882 12.9377   1
  -8  -4  -6 43.8829 5.48742   1
   8  -4  -7 97.0614 12.4527  -2
  -8   4  -6 97.0614 12.4527   1
  -8   4   8 292.573 13.2694  -2
   8  -4   7 292.573 13.2694   1
  -8  -4   9 17.8386 7.48996  -2
   8   4   8 17.8386 7.48996   1
  -8  -4  10 221.280 10.9051  -2
   8   4   9 221.280 10.9051   1
  -8  -4 -10 78.4132 12.9278   1
  -8  -4  11 101.153 11.0020  -2
   8   4  10 101.153 11.0020   1
  -8  -4  12 169.086 15.0653  -2
   8   4  11 169.086 15.0653   1
  -8   4  13 186.057 16.1879  -2
   8  -4  12 186.057 16.1879   1
  -8   4  14 47.6618 17.7642  -2
   8  -4  13 47.6618 17.7642   1
  -8  -4  15 114.790 19.8684  -2
   8   4  14 114.790 19.8684   1
   8  -5  14 74.6906 36.1820  -2
  -8   5  15 74.6906 36.1820   1
   8  -5  13 78.7540 17.2413  -2
  -8   5  14 78.7540 17.2413   1
   8   5  12 170.097 18.3032  -2
  -8  -5  13 170.097 18.3032   1
   8   5  11 130.051 14.4899  -2
  -8  -5  12 130.051 14.4899   1
   8   5  10 256.647 13.8462  -2
  -8  -5  11 256.647 13.8462   1
   8   5   9 56.3500 10.5771  -2
  -8  -5  10 56.3500 10.5771   1
   8  -5   8 489.716 17.7130  -2
  -8   5   9 489.716 17.7130   1
   8  -5   7 65.6036 10.7706  -2
  -8   5   8 65.6036 10.7706   1
   8   5   6 244.639 10.2906  -2
  -8  -5   7 244.639 10.2906   1
  -8   5  -5 799.113 15.9963  -2
   8  -5  -6 799.113 15.9963   1
   8   5   4 99.0370 7.17988  -2
  -8  -5   5 99.0370 7.17988   1
   8   5   3 529.889 12.0342  -2
  -8  -5   4 529.889 12.0342   1
  -8   5  -2 95.9310 7.38731  -2
   8  -5  -3 95.9310 7.38731   1
  -8  -5  -1 627.661 12.0319  -2
   8   5  -2 627.661 12.0319   1
  -8  -5   0 294.650 9.29913  -2
   8   5  -1 294.650 9.29913   1
   8  -5   0 3.24147 7.79586   1
  -8  -5   1 169.944 9.31853  -2
   8   5   0 169.944 9.31853   1
   8   5  -2 592.561 14.0832  -2
  -8  -5  -1 592.561 14.0832   1
  -8  -5  -2 3.56713 9.63567   1
   8  -5  -3 39.2008 7.64871  -2
  -8   5  -2 39.2008 7.64871   1
  -8  -5  -3 680.179 19.7646   1
  -8  -5   4 751.736 23.4390  -2
   8   5   3 751.736 23.4390   1
  -8  -5  -4 16.5305 6.74773   1
  -8  -5   5 35.5194 10.6376  -2
   8   5   4 35.5194 10.6376   1
  -8  -5  -5 210.540 9.62005   1
  -8  -5   6 396.388 17.9872  -2
   8   5   5 396.388 17.9872   1
  -8  -5  -6 300.908 7.75148   1
   8   5  -7 419.875 19.0618  -2
  -8  -5  -6 419.875 19.0618   1
  -8  -5   8 216.606 11.5007  -2
   8   5   7 216.606 11.5007   1
  -8  -5   9 279.613 14.6676  -2
   8   5   8 279.613 14.6676   1
  -8  -5  10 45.5805 8.90713  -2
   8   5   9 45.5805 8.90713   1
  -8  -5  11 404.955 13.0971  -2
   8   5  10 404.955 13.0971   1
  -8   5  12 83.9894 14.5547  -2
   8  -5  11 83.9894 14.5547   1
  -8  -5  13 56.8002 13.8575  -2
   8   5  12 56.8002 13.8575   1
  -8  -5  14 159.488 21.0651  -2
   8   5  13 159.488 21.0651   1
  -8   5  15-43.9090 43.5505  -2
   8  -5  14-43.9090 43.5505   1
  -8  -5  16 41.2555 41.8609  -2
   8   5  15 41.2555 41.8609   1
   8   6  13 3.51099 17.8323  -2
  -8  -6  14 3.51099 17.8323   1
   8   6  12 65.7578 16.6091  -2
  -8  -6  13 65.7578 16.6091   1
   8   6  11 135.634 20.1112  -2
  -8  -6  12 135.634 20.1112   1
   8   6  10 37.6273 13.6726  -2
  -8  -6  11 37.6273 13.6726   1
   8   6   9 208.228 15.0229  -2
  -8  -6  10 208.228 15.0229   1
   8   6   8 43.9203 11.4244  -2
  -8  -6   9 43.9203 11.4244   1
   8   6   7 186.215 12.8361  -2
  -8  -6   8 186.215 12.8361   1
  -8   6  -6 261.614 13.2849  -2
   8  -6  -7 261.614 13.2849   1
   8   6   5 52.8457 8.35091  -2
  -8  -6   6 52.8457 8.35091   1
  -8   6  -4 468.035 12.9696  -2
   8  -6  -5 468.035 12.9696   1
  -8  -6  -3 70.1248 8.50766  -2
   8   6  -4 70.1248 8.50766   1
  -8   6   3 712.126 43.2421   1
  -8   6  -2 871.514 18.9162  -2
   8  -6  -3 871.514 18.9162   1
  -8   6   2-6.25829 15.7414   1
  -8  -6  -1 71.5645 8.82898  -2
   8   6  -2 71.5645 8.82898   1
  -8   6   1 185.221 24.9715   1
  -8  -6   0 395.912 12.1070  -2
   8   6  -1 395.912 12.1070   1
  -8   6   0 575.757 37.0953   1
   8  -6  -1 683.514 14.0640  -2
  -8   6   0 683.514 14.0640   1
  -8  -6   2 198.794 11.8591  -2
   8   6   1 198.794 11.8591   1
   8   6  -3 384.813 14.4795  -2
  -8  -6  -2 384.813 14.4795   1
  -8  -6  -3 97.1816 12.7886   1
  -8  -6   4 128.967 10.7169  -2
   8   6   3 128.967 10.7169   1
  -8  -6  -4 350.805 15.0045   1
  -8  -6   5 419.264 17.6601  -2
   8   6   4 419.264 17.6601   1
  -8  -6  -5 154.076 8.51817   1
  -8  -6   6 141.525 12.6779  -2
   8   6   5 141.525 12.6779   1
  -8  -6   7 54.9073 11.8984  -2
   8   6   6 54.9073 11.8984   1
  -8  -6   8 387.285 16.1831  -2
   8   6   7 387.285 16.1831   1
  -8  -6   9 53.4296 11.1105  -2
   8   6   8 53.4296 11.1105   1
  -8   6  10 363.751 15.9501  -2
   8  -6   9 363.751 15.9501   1
  -8  -6  11 34.3007 8.66307  -2
   8   6  10 34.3007 8.66307   1
   8   6 -12 98.3401 17.7975  -2
  -8  -6 -11 98.3401 17.7975   1
  -8   6  13 90.7339 18.0506  -2
   8  -6  12 90.7339 18.0506   1
  -8  -6  14 144.766 39.0281  -2
   8   6  13 144.766 39.0281   1
  -8   6  15-9.92109 30.5505  -2
   8  -6  14-9.92109 30.5505   1
   8   7  13 23.8553 23.5630  -2
  -8  -7  14 23.8553 23.5630   1
   8   7  12 175.968 28.0240  -2
  -8  -7  13 175.968 28.0240   1
  -8  -7  12 38.9128 28.4319   1
   8   7  11 18.6066 17.8069  -2
  -8  -7  12 18.6066 17.8069   1
   8  -7  10 205.805 18.7128  -2
  -8   7  11 205.805 18.7128   1
   8   7   9 57.4100 12.5428  -2
  -8  -7  10 57.4100 12.5428   1
   8   7   8 528.224 17.8596  -2
  -8  -7   9 528.224 17.8596   1
   8   7   7 66.5067 11.5986  -2
  -8  -7   8 66.5067 11.5986   1
   8   7   6 118.721 11.9008  -2
  -8  -7   7 118.721 11.9008   1
   8   7   5 307.442 11.3849  -2
  -8  -7   6 307.442 11.3849   1
  -8  -7  -4 52.7962 8.21454  -2
   8   7  -5 52.7962 8.21454   1
   8   7   3 251.163 10.4952  -2
  -8  -7   4 251.163 10.4952   1
  -8   7  -2 168.794 10.4479  -2
   8  -7  -3 168.794 10.4479   1
  -8   7   2 173.230 25.7872   1
  -8   7  -1 321.619 13.2550  -2
   8  -7  -2 321.619 13.2550   1
  -8   7   1 340.806 30.6846   1
  -8  -7   0 343.559 13.4508  -2
   8   7  -1 343.559 13.4508   1
  -8   7   0 30.3363 18.8527   1
  -8  -7   1 89.7463 8.08106  -2
   8   7   0 89.7463 8.08106   1
  -8  -7   2 473.735 16.6921  -2
   8   7   1 473.735 16.6921   1
   8   7  -3 54.1305 10.7658  -2
  -8  -7  -2 54.1305 10.7658   1
  -8   7  -3 610.253 36.4507   1
  -8  -7   4 710.979 20.7351  -2
   8   7   3 710.979 20.7351   1
  -8  -7  -4 3.42413 7.29450   1
  -8  -7   5 16.9896 10.4879  -2
   8   7   4 16.9896 10.4879   1
  -8  -7  -5 153.141 8.57088   1
  -8  -7   6 239.519 17.8041  -2
   8   7   5 239.519 17.8041   1
  -8  -7   7 148.910 12.4241  -2
   8   7   6 148.910 12.4241   1
  -8  -7   8 140.374 12.7916  -2
   8   7   7 140.374 12.7916   1
  -8  -7   9 130.878 13.3874  -2
   8   7   8 130.878 13.3874   1
  -8  -7  10 61.9282 10.5605  -2
   8   7   9 61.9282 10.5605   1
  -8  -7  11 181.744 15.9241  -2
   8   7  10 181.744 15.9241   1
  -8   7  12 48.7860 13.9980  -2
   8  -7  11 48.7860 13.9980   1
  -8  -7  13 18.6058 23.4488  -2
   8   7  12 18.6058 23.4488   1
   8   7  13 160.878 35.8137   1
  -8  -7  14 196.980 54.8184  -2
   8   7  13 196.980 54.8184   1
  -8  -8 -13 11.8352 30.5114  -2
   8   8 -14 11.8352 30.5114   1
  -8  -8 -12 56.0521 18.3571  -2
   8   8 -13 56.0521 18.3571   1
   8   8  11 97.9407 21.5070  -2
  -8  -8  12 97.9407 21.5070   1
   8   8  10 46.4019 16.4115  -2
  -8  -8  11 46.4019 16.4115   1
   8   8   9 90.8841 13.1594  -2
  -8  -8  10 90.8841 13.1594   1
   8  -8   8 21.7446 11.5171  -2
  -8   8   9 21.7446 11.5171   1
   8   8   7 130.358 13.1981  -2
  -8  -8   8 130.358 13.1981   1
   8  -8   6 333.143 15.3132  -2
  -8   8   7 333.143 15.3132   1
   8   8   5 52.8394 10.9956  -2
  -8  -8   6 52.8394 10.9956   1
  -8   8  -4 377.725 12.8771  -2
   8  -8  -5 377.725 12.8771   1
   8  -8   3 48.5726 8.01224  -2
  -8   8   4 48.5726 8.01224   1
  -8   8   3 573.109 41.9242   1
   8   8   2 706.603 16.5268  -2
  -8  -8   3 706.603 16.5268   1
  -8   8   2 13.5939 17.9694   1
  -8  -8  -1 94.8752 11.1850  -2
   8   8  -2 94.8752 11.1850   1
  -8   8   1 123.390 24.6169   1
   8   8   0 223.652 14.0600  -2
  -8  -8   1 223.652 14.0600   1
  -8   8   0 145.645 24.1201   1
  -8  -8   1 177.119 9.93749  -2
   8   8   0 177.119 9.93749   1
  -8   8  -1 280.120 29.8319   1
  -8  -8   2 221.898 10.7594  -2
   8   8   1 221.898 10.7594   1
  -8  -8   3 147.295 12.9605  -2
   8   8   2 147.295 12.9605   1
  -8  -8   4 49.9808 10.9289  -2
   8   8   3 49.9808 10.9289   1
  -8  -8  -4 83.6307 11.1468   1
  -8  -8   5 172.547 14.0921  -2
   8   8   4 172.547 14.0921   1
  -8  -8   6 181.469 14.2359  -2
   8   8   5 181.469 14.2359   1
  -8  -8   7 105.432 11.9311  -2
   8   8   6 105.432 11.9311   1
  -8  -8   8 480.420 17.6424  -2
   8   8   7 480.420 17.6424   1
  -8   8   9 3.57054 9.75053  -2
   8  -8   8 3.57054 9.75053   1
  -8  -8  10 276.172 14.2337  -2
   8   8   9 276.172 14.2337   1
  -8   8  11 12.2528 13.2846  -2
   8  -8  10 12.2528 13.2846   1
  -8  -8  12 121.551 17.4629  -2
   8   8  11 121.551 17.4629   1
  -8  -8  13 10.3994 28.5744  -2
   8   8  12 10.3994 28.5744   1
  -8  -9 -12 202.017 27.2970  -2
   8   9 -13 202.017 27.2970   1
  -8  -9 -11-0.46982 16.9107  -2
   8   9 -12-0.46982 16.9107   1
  -8  -9 -10 113.184 14.6860  -2
   8   9 -11 113.184 14.6860   1
  -8  -9  -9 43.4002 13.1558  -2
   8   9 -10 43.4002 13.1558   1
  -8  -9  -8 443.951 19.2129  -2
   8   9  -9 443.951 19.2129   1
  -8  -9  -7 45.8773 12.6468  -2
   8   9  -8 45.8773 12.6468   1
  -8  -9  -6 85.7659 11.9714  -2
   8   9  -7 85.7659 11.9714   1
   8  -9   5 62.7170 11.6405  -2
  -8   9   6 62.7170 11.6405   1
  -8  -9  -4 53.3924 9.47773  -2
   8   9  -5 53.3924 9.47773   1
  -8   9   4 10.1997 20.3782   1
  -8  -9  -3 171.333 10.2647  -2
   8   9  -4 171.333 10.2647   1
  -8   9   3 60.0755 23.0557   1
  -8  -9  -2 71.4997 9.72783  -2
   8   9  -3 71.4997 9.72783   1
  -8   9   2 19.6487 17.3904   1
   8   9   1 194.158 13.5607  -2
  -8  -9   2 194.158 13.5607   1
  -8  -9   0 309.139 14.8756  -2
   8   9  -1 309.139 14.8756   1
  -8  -9   1 77.2343 8.67713  -2
   8   9   0 77.2343 8.67713   1
  -8  -9   2 668.575 15.8336  -2
   8   9   1 668.575 15.8336   1
  -8  -9   3 15.5705 8.90024  -2
   8   9   2 15.5705 8.90024   1
  -8  -9   4 571.512 20.2185  -2
   8   9   3 571.512 20.2185   1
  -8  -9   5 16.7062 11.0290  -2
   8   9   4 16.7062 11.0290   1
  -8  -9   6 152.453 12.2893  -2
   8   9   5 152.453 12.2893   1
  -8  -9   7 72.3745 10.4373  -2
   8   9   6 72.3745 10.4373   1
  -8  -9   8 89.0294 11.1477  -2
   8   9   7 89.0294 11.1477   1
  -8  -9   9 108.706 12.0839  -2
   8   9   8 108.706 12.0839   1
  -8  -9  10 22.7553 10.7066  -2
   8   9   9 22.7553 10.7066   1
  -8  -9  11 34.2084 14.8131  -2
   8   9  10 34.2084 14.8131   1
  -8  -9  12 27.9277 32.6261  -2
   8   9  11 27.9277 32.6261   1
  -8 -10 -10-21.8373 14.9832  -2
   8  10 -11-21.8373 14.9832   1
  -8 -10  -9 42.9511 13.7515  -2
   8  10 -10 42.9511 13.7515   1
   8 -10   8 70.1217 14.0261  -2
  -8  10   9 70.1217 14.0261   1
  -8 -10  -7 75.8967 14.0278  -2
   8  10  -8 75.8967 14.0278   1
  -8 -10  -6 207.492 15.4580  -2
   8  10  -7 207.492 15.4580   1
  -8 -10  -5-1.04410 10.9105  -2
   8  10  -6-1.04410 10.9105   1
  -8 -10  -4 201.982 15.3472  -2
   8  10  -5 201.982 15.3472   1
  -8 -10  -3 60.9897 11.3233  -2
   8  10  -4 60.9897 11.3233   1
  -8 -10  -2 424.087 16.2440  -2
   8  10  -3 424.087 16.2440   1
   8  10   1 44.2927 9.16369  -2
  -8 -10   2 44.2927 9.16369   1
  -8  10   0 74.2306 9.62756  -2
   8 -10  -1 74.2306 9.62756   1
  -8  10   1 39.6087 7.92116  -2
   8 -10   0 39.6087 7.92116   1
  -8 -10   2 94.8331 9.23111  -2
   8  10   1 94.8331 9.23111   1
  -8 -10   3 143.767 9.83849  -2
   8  10   2 143.767 9.83849   1
  -8 -10   4 56.3781 10.0732  -2
   8  10   3 56.3781 10.0732   1
  -8 -10   5 61.6397 8.90107  -2
   8  10   4 61.6397 8.90107   1
  -8 -10   6 31.8486 9.36280  -2
   8  10   5 31.8486 9.36280   1
  -8 -10   7 72.2287 10.5834  -2
   8  10   6 72.2287 10.5834   1
  -8 -10   8 317.319 14.7031  -2
   8  10   7 317.319 14.7031   1
  -8 -10   9-4.60613 11.5363  -2
   8  10   8-4.60613 11.5363   1
  -8 -10  10 217.802 15.4784  -2
   8  10   9 217.802 15.4784   1
  -8 -10  11-6.81735 27.6324  -2
   8  10  10-6.81735 27.6324   1
   8  11   9 46.1941 29.5111  -2
  -8 -11  10 46.1941 29.5111   1
  -8 -11  -8 296.611 18.5409  -2
   8  11  -9 296.611 18.5409   1
  -8 -11  -7 11.4165 13.1725  -2
   8  11  -8 11.4165 13.1725   1
  -8 -11  -6 38.9249 12.7721  -2
   8  11  -7 38.9249 12.7721   1
  -8 -11  -5 48.1960 11.8528  -2
   8  11  -6 48.1960 11.8528   1
  -8 -11  -4 48.2239 18.2654  -2
   8  11  -5 48.2239 18.2654   1
  -8 -11  -3 61.5045 19.7911  -2
   8  11  -4 61.5045 19.7911   1
  -8 -11  -2 107.094 16.5186  -2
   8  11  -3 107.094 16.5186   1
  -8  11  -1 64.7006 12.1959  -2
   8 -11  -2 64.7006 12.1959   1
  -8  11   0 162.150 13.9724  -2
   8 -11  -1 162.150 13.9724   1
  -8  11   1 46.4256 11.4121  -2
   8 -11   0 46.4256 11.4121   1
  -8 -11   2 203.837 11.2459  -2
   8  11   1 203.837 11.2459   1
  -8 -11   3 24.0896 8.67327  -2
   8  11   2 24.0896 8.67327   1
  -8 -11   4 368.424 12.4523  -2
   8  11   3 368.424 12.4523   1
  -8 -11   5 10.1823 8.25546  -2
   8  11   4 10.1823 8.25546   1
  -8 -11   6 112.844 12.9491  -2
   8  11   5 112.844 12.9491   1
  -8 -11   7 32.3267 11.5659  -2
   8  11   6 32.3267 11.5659   1
  -8 -11   8 43.9177 13.9205  -2
   8  11   7 43.9177 13.9205   1
  -8 -11   9 70.1978 15.7904  -2
   8  11   8 70.1978 15.7904   1
  -8 -11  10 33.8567 24.2774  -2
   8  11   9 33.8567 24.2774   1
   8  12   7 82.2215 32.9191  -2
  -8 -12   8 82.2215 32.9191   1
   8  12   6 108.529 23.7595  -2
  -8 -12   7 108.529 23.7595   1
  -8 -12  -5 44.7972 18.8469  -2
   8  12  -6 44.7972 18.8469   1
  -8 -12  -4 196.523 22.5511  -2
   8  12  -5 196.523 22.5511   1
  -8 -12  -3 65.0517 15.9786  -2
   8  12  -4 65.0517 15.9786   1
  -8 -12  -2 509.942 24.7816  -2
   8  12  -3 509.942 24.7816   1
  -8  12  -1-3.88179 15.1078  -2
   8 -12  -2-3.88179 15.1078   1
  -8  12   0 38.2459 15.5197  -2
   8 -12  -1 38.2459 15.5197   1
  -8 -12   1 20.3816 11.5282  -2
   8  12   0 20.3816 11.5282   1
  -8 -12   2 17.5049 10.6390  -2
   8  12   1 17.5049 10.6390   1
  -8 -12   3 170.535 13.4374  -2
   8  12   2 170.535 13.4374   1
   8  12  -4 74.8519 11.9800  -2
  -8 -12  -3 74.8519 11.9800   1
  -8 -12   5 66.5057 12.0642  -2
   8  12   4 66.5057 12.0642   1
  -8 -12   6 53.6537 13.5082  -2
   8  12   5 53.6537 13.5082   1
  -8 -12   7 34.5901 15.3111  -2
   8  12   6 34.5901 15.3111   1
  -8  12   8 123.940 17.3079  -2
   8 -12   7 123.940 17.3079   1
  -8 -12   9 11.2790 26.7863  -2
   8  12   8 11.2790 26.7863   1
   8  13   5 0.05753 30.5320  -2
  -8 -13   6 0.05753 30.5320   1
   8  13   3 130.846 24.0365  -2
  -8 -13   4 130.846 24.0365   1
   8  13   2 39.6627 17.1988  -2
  -8 -13   3 39.6627 17.1988   1
   8  13   1 26.0895 16.1999  -2
  -8 -13   2 26.0895 16.1999   1
  -8 -13   0 34.7519 16.2889  -2
   8  13  -1 34.7519 16.2889   1
  -8 -13   1-5.65857 15.3579  -2
   8  13   0-5.65857 15.3579   1
  -8 -13   2 63.4489 18.0974  -2
   8  13   1 63.4489 18.0974   1
  -8 -13   3 11.0924 10.8557  -2
   8  13   2 11.0924 10.8557   1
   8 -13   3 154.807 22.3836   1
  -8 -13   4 214.730 20.2011  -2
   8  13   3 214.730 20.2011   1
  -8 -13   5 23.2995 15.0376  -2
   8  13   4 23.2995 15.0376   1
  -8  13   6 63.0512 20.5017  -2
   8 -13   5 63.0512 20.5017   1
  -8 -14  -2 21.4777 30.8713  -2
   8  14  -3 21.4777 30.8713   1
  -8 -14  -1 104.900 36.8652  -2
   8  14  -2 104.900 36.8652   1
  -9   0  14 121.331 25.9930   1
  -9   0  12 188.560 20.2765   1
   9   0 -10 27.6382 10.3366   1
  -9   0   8 19.0946 6.95492   1
   9   0  -6 1476.07 20.2077   1
  -9   0   4 1335.59 20.4309   1
   9   0  -2 1117.07 23.3028   1
  -9   0   0 321.533 21.5922   1
   9   0   2-3.81339 5.18167   1
   9   0   4 241.813 10.5274   1
   9   0   6 1221.28 26.5537   1
   9   0   8 357.593 16.9971   1
   9   0  10 715.622 22.0867   1
   9   0  12 83.1775 21.5742   1
   9   0  14 65.6044 21.3279   1
   9   1  13 24.6457 19.4654  -2
  -9  -1  14 24.6457 19.4654   1
   9   1  12 46.1109 16.3974  -2
  -9  -1  13 46.1109 16.3974   1
   9  -1  11 434.676 37.0730  -2
  -9   1  12 434.676 37.0730   1
   9  -1  10 15.5990 11.8202  -2
  -9   1  11 15.5990 11.8202   1
   9  -1   9 326.568 15.7111  -2
  -9   1  10 326.568 15.7111   1
   9  -1   8 5.93304 6.79966  -2
  -9   1   9 5.93304 6.79966   1
  -9   1  -7 337.707 15.1994  -2
   9  -1  -8 337.707 15.1994   1
  -9  -1  -6 39.2438 8.70455  -2
   9   1  -7 39.2438 8.70455   1
  -9   1  -5 270.233 15.0352  -2
   9  -1  -6 270.233 15.0352   1
   9  -1   4 396.518 13.6445  -2
  -9   1   5 396.518 13.6445   1
   9  -1   3 40.4633 7.61529  -2
  -9   1   4 40.4633 7.61529   1
  -9   1  -2 160.641 9.95633  -2
   9  -1  -3 160.641 9.95633   1
  -9   1  -1 26.2008 9.40605  -2
   9  -1  -2 26.2008 9.40605   1
  -9   1   0 183.684 10.8803  -2
   9  -1  -1 183.684 10.8803   1
   9  -1  -1 873.058 22.4856  -2
  -9   1   0 873.058 22.4856   1
   9  -1  -2 8.72666 4.46848  -2
  -9   1  -1 8.72666 4.46848   1
  -9  -1   3 574.412 9.12538  -2
   9   1   2 574.412 9.12538   1
  -9  -1   4-0.10335 4.50094  -2
   9   1   3-0.10335 4.50094   1
   9   1  -5 1358.61 16.8337  -2
  -9  -1  -4 1358.61 16.8337   1
  -9  -1   6 50.3726 6.26638  -2
   9   1   5 50.3726 6.26638   1
   9   1  -7 236.417 13.4514  -2
  -9  -1  -6 236.417 13.4514   1
   9  -1  -8 55.1022 9.75673  -2
  -9   1  -7 55.1022 9.75673   1
  -9   1   9 36.6099 8.74390  -2
   9  -1   8 36.6099 8.74390   1
  -9  -1  10 131.743 11.0909  -2
   9   1   9 131.743 11.0909   1
  -9  -1  11 43.8390 9.70812  -2
   9   1  10 43.8390 9.70812   1
   9  -1 -12 115.918 11.4272  -2
  -9   1 -11 115.918 11.4272   1
  -9  -1  13 164.806 24.6828  -2
   9   1  12 164.806 24.6828   1
  -9  -1  14 19.7556 15.8807  -2
   9   1  13 19.7556 15.8807   1
  -9  -1  15 159.892 23.9507  -2
   9   1  14 159.892 23.9507   1
   9   2  13 80.2917 21.0833  -2
  -9  -2  14 80.2917 21.0833   1
   9   2  12 54.3407 19.4392  -2
  -9  -2  13 54.3407 19.4392   1
  -9   2 -11 116.232 16.9048  -2
   9  -2 -12 116.232 16.9048   1
   9  -2  10 202.028 14.1182  -2
  -9   2  11 202.028 14.1182   1
   9   2   9 57.6026 10.7053  -2
  -9  -2  10 57.6026 10.7053   1
   9   2   8 142.676 12.4023  -2
  -9  -2   9 142.676 12.4023   1
   9   2   7 86.1457 9.22100  -2
  -9  -2   8 86.1457 9.22100   1
  -9   2  -6 192.013 11.1680  -2
   9  -2  -7 192.013 11.1680   1
  -9   2  -5 835.319 19.3858  -2
   9  -2  -6 835.319 19.3858   1
   9   2   4 64.9620 8.17697  -2
  -9  -2   5 64.9620 8.17697   1
   9   2   3 443.164 13.3664  -2
  -9  -2   4 443.164 13.3664   1
  -9  -2  -2 10.9795 6.16741  -2
   9   2  -3 10.9795 6.16741   1
   9  -2   1 1257.30 20.4010  -2
  -9   2   2 1257.30 20.4010   1
  -9  -2   0 97.0125 8.18783  -2
   9   2  -1 97.0125 8.18783   1
   9   2  -1 283.360 15.5788  -2
  -9  -2   0 283.360 15.5788   1
  -9  -2   2 458.240 11.4871  -2
   9   2   1 458.240 11.4871   1
  -9  -2   3 10.3054 5.45484  -2
   9   2   2 10.3054 5.45484   1
  -9  -2   4 267.623 8.83336  -2
   9   2   3 267.623 8.83336   1
   9   2  -5 37.0666 5.86706  -2
  -9  -2  -4 37.0666 5.86706   1
  -9  -2   6 164.253 8.72046  -2
   9   2   5 164.253 8.72046   1
   9  -2  -7 617.639 18.9218  -2
  -9   2  -6 617.639 18.9218   1
   9   2  -8 28.7670 9.11850  -2
  -9  -2  -7 28.7670 9.11850   1
  -9   2   9 387.815 14.2686  -2
   9  -2   8 387.815 14.2686   1
   9   2 -10 23.9492 8.55709  -2
  -9  -2  -9 23.9492 8.55709   1
   9  -2 -11 626.664 16.7095  -2
  -9   2 -10 626.664 16.7095   1
  -9   2  12 32.8735 11.4719  -2
   9  -2  11 32.8735 11.4719   1
  -9  -2  13 56.7070 17.4376  -2
   9   2  12 56.7070 17.4376   1
  -9   2  14 33.0612 14.9719  -2
   9  -2  13 33.0612 14.9719   1
  -9  -2  15 13.4152 18.5224  -2
   9   2  14 13.4152 18.5224   1
   9   3  13 53.1039 33.4678  -2
  -9  -3  14 53.1039 33.4678   1
   9   3  12 51.7787 15.2352  -2
  -9  -3  13 51.7787 15.2352   1
   9  -3  11 304.573 21.7143  -2
  -9   3  12 304.573 21.7143   1
   9  -3  10 28.3664 10.1225  -2
  -9   3  11 28.3664 10.1225   1
   9  -3   9 407.949 18.0218  -2
  -9   3  10 407.949 18.0218   1
   9   3   8 13.8046 9.60624  -2
  -9  -3   9 13.8046 9.60624   1
   9  -3   7 547.136 16.0750  -2
  -9   3   8 547.136 16.0750   1
  -9  -3  -6 117.334 9.78694  -2
   9   3  -7 117.334 9.78694   1
  -9   3  -5 259.102 12.5625  -2
   9  -3  -6 259.102 12.5625   1
   9   3   4 381.134 14.3994  -2
  -9  -3   5 381.134 14.3994   1
   9   3   3 36.1727 7.55754  -2
  -9  -3   4 36.1727 7.55754   1
  -9  -3  -2 128.041 8.09450  -2
   9   3  -3 128.041 8.09450   1
  -9  -3  -1 83.0858 8.34251  -2
   9   3  -2 83.0858 8.34251   1
  -9  -3   0 348.181 11.8317  -2
   9   3  -1 348.181 11.8317   1
  -9   3   1 946.531 16.2030  -2
   9  -3   0 946.531 16.2030   1
  -9  -3   2 92.0696 7.98605  -2
   9   3   1 92.0696 7.98605   1
  -9  -3   3 437.738 12.4723  -2
   9   3   2 437.738 12.4723   1
  -9  -3   4 11.6341 6.03685  -2
   9   3   3 11.6341 6.03685   1
   9  -3  -5 801.264 14.5149  -2
  -9   3  -4 801.264 14.5149   1
   9  -3  -6 73.9060 7.67026  -2
  -9   3  -5 73.9060 7.67026   1
   9  -3  -7 140.555 11.8517  -2
  -9   3  -6 140.555 11.8517   1
  -9  -3   8 267.172 14.7746  -2
   9   3   7 267.172 14.7746   1
  -9   3   9 31.2002 8.51441  -2
   9  -3   8 31.2002 8.51441   1
  -9  -3  10 138.431 10.0315  -2
   9   3   9 138.431 10.0315   1
  -9  -3  11 53.5776 9.38623  -2
   9   3  10 53.5776 9.38623   1
  -9   3  12 94.6551 16.3301  -2
   9  -3  11 94.6551 16.3301   1
  -9   3  13 154.979 19.3638  -2
   9  -3  12 154.979 19.3638   1
  -9  -3  14 39.8091 19.1000  -2
   9   3  13 39.8091 19.1000   1
  -9  -3  15 86.8995 20.5160  -2
   9   3  14 86.8995 20.5160   1
  -9   4 -13 73.2163 22.6474  -2
   9  -4 -14 73.2163 22.6474   1
   9   4  12 72.5607 17.0124  -2
  -9  -4  13 72.5607 17.0124   1
   9  -4  11 104.099 13.5616  -2
  -9   4  12 104.099 13.5616   1
  -9   4 -10 221.974 15.8486  -2
   9  -4 -11 221.974 15.8486   1
   9  -4   9 39.1515 11.1929  -2
  -9   4  10 39.1515 11.1929   1
   9   4   8 392.501 18.1644  -2
  -9  -4   9 392.501 18.1644   1
   9   4   7 65.9255 11.4732  -2
  -9  -4   8 65.9255 11.4732   1
   9   4   6 168.257 11.0285  -2
  -9  -4   7 168.257 11.0285   1
   9   4   5 712.438 19.1320  -2
  -9  -4   6 712.438 19.1320   1
   9  -4   4 89.3496 9.70787  -2
  -9   4   5 89.3496 9.70787   1
   9   4   3 418.047 14.0971  -2
  -9  -4   4 418.047 14.0971   1
  -9  -4  -2 7.67887 6.94930  -2
   9   4  -3 7.67887 6.94930   1
  -9  -4  -1 814.882 18.3302  -2
   9   4  -2 814.882 18.3302   1
  -9  -4   0 211.138 11.0975  -2
   9   4  -1 211.138 11.0975   1
  -9  -4   1 229.850 8.92129  -2
   9   4   0 229.850 8.92129   1
  -9  -4   2 487.888 13.5033  -2
   9   4   1 487.888 13.5033   1
  -9  -4   3 16.0303 6.43058  -2
   9   4   2 16.0303 6.43058   1
   9  -4  -4 424.474 12.6371  -2
  -9   4  -3 424.474 12.6371   1
  -9  -4   5 58.1702 7.48858  -2
   9   4   4 58.1702 7.48858   1
   9   4  -6 204.609 9.74619  -2
  -9  -4  -5 204.609 9.74619   1
  -9  -4   7 349.805 18.1611  -2
   9   4   6 349.805 18.1611   1
  -9  -4   8 66.4261 10.4033  -2
   9   4   7 66.4261 10.4033   1
  -9  -4   9 191.520 10.9916  -2
   9   4   8 191.520 10.9916   1
  -9  -4  10 13.6840 7.85071  -2
   9   4   9 13.6840 7.85071   1
  -9  -4  11 475.786 18.3430  -2
   9   4  10 475.786 18.3430   1
  -9  -4  12 43.3870 14.6600  -2
   9   4  11 43.3870 14.6600   1
  -9   4  13 55.2768 14.1780  -2
   9  -4  12 55.2768 14.1780   1
  -9  -4  14 55.1350 27.4471  -2
   9   4  13 55.1350 27.4471   1
  -9   5 -13 12.7518 17.0652  -2
   9  -5 -14 12.7518 17.0652   1
   9   5  12 55.1315 13.5526  -2
  -9  -5  13 55.1315 13.5526   1
   9  -5  11 254.824 16.1319  -2
  -9   5  12 254.824 16.1319   1
   9   5  10 28.7450 11.1572  -2
  -9  -5  11 28.7450 11.1572   1
   9   5   9 244.177 16.5974  -2
  -9  -5  10 244.177 16.5974   1
   9   5   8 44.3676 11.7898  -2
  -9  -5   9 44.3676 11.7898   1
   9   5   7 185.425 15.0964  -2
  -9  -5   8 185.425 15.0964   1
   9   5   6 207.872 12.2878  -2
  -9  -5   7 207.872 12.2878   1
  -9   5  -5 109.335 10.0688  -2
   9  -5  -6 109.335 10.0688   1
  -9   5  -4 331.823 14.4158  -2
   9  -5  -5 331.823 14.4158   1
   9  -5   3 56.3460 9.22359  -2
  -9   5   4 56.3460 9.22359   1
   9  -5   2 447.209 14.4137  -2
  -9   5   3 447.209 14.4137   1
  -9  -5  -1 49.1493 8.42225  -2
   9   5  -2 49.1493 8.42225   1
  -9  -5   0 199.372 11.3036  -2
   9   5  -1 199.372 11.3036   1
   9   5  -1 351.749 11.1538  -2
  -9  -5   0 351.749 11.1538   1
   9   5  -2 93.4761 8.78682  -2
  -9  -5  -1 93.4761 8.78682   1
  -9  -5   3 240.613 11.0001  -2
   9   5   2 240.613 11.0001   1
  -9  -5   4 50.1648 7.54954  -2
   9   5   3 50.1648 7.54954   1
  -9  -5   5 526.033 14.7837  -2
   9   5   4 526.033 14.7837   1
  -9  -5   6 102.430 8.30737  -2
   9   5   5 102.430 8.30737   1
   9  -5  -7 41.2144 11.6684  -2
  -9   5  -6 41.2144 11.6684   1
  -9  -5   8 184.608 12.3269  -2
   9   5   7 184.608 12.3269   1
   9   5  -9 24.9733 8.18898  -2
  -9  -5  -8 24.9733 8.18898   1
  -9  -5  10 197.972 12.7720  -2
   9   5   9 197.972 12.7720   1
  -9   5  11 19.6338 10.2770  -2
   9  -5  10 19.6338 10.2770   1
  -9  -5  12 125.049 15.3598  -2
   9   5  11 125.049 15.3598   1
  -9  -5  13 65.9607 14.8144  -2
   9   5  12 65.9607 14.8144   1
  -9  -5  14 90.5886 36.7037  -2
   9   5  13 90.5886 36.7037   1
  -9   6 -13 38.5018 22.8291  -2
   9  -6 -14 38.5018 22.8291   1
   9   6  12 111.123 18.9085  -2
  -9  -6  13 111.123 18.9085   1
   9   6  11 20.0387 13.3970  -2
  -9  -6  12 20.0387 13.3970   1
   9  -6  10 182.017 15.5209  -2
  -9   6  11 182.017 15.5209   1
   9  -6   9 49.9464 13.0004  -2
  -9   6  10 49.9464 13.0004   1
   9   6   8 478.645 21.3758  -2
  -9  -6   9 478.645 21.3758   1
   9   6   7 55.8638 12.0340  -2
  -9  -6   8 55.8638 12.0340   1
  -9   6  -6 216.170 14.2119  -2
   9  -6  -7 216.170 14.2119   1
   9   6   5 358.612 14.3420  -2
  -9  -6   6 358.612 14.3420   1
  -9   6  -4 117.715 10.9609  -2
   9  -6  -5 117.715 10.9609   1
   9   6   3 341.081 14.5794  -2
  -9  -6   4 341.081 14.5794   1
   9   6   2 19.4920 8.23708  -2
  -9  -6   3 19.4920 8.23708   1
  -9  -6  -1 397.391 14.0790  -2
   9   6  -2 397.391 14.0790   1
  -9  -6   0 176.193 11.0514  -2
   9   6  -1 176.193 11.0514   1
  -9  -6   1 81.9735 7.89655  -2
   9   6   0 81.9735 7.89655   1
   9  -6  -2 432.319 16.0471  -2
  -9   6  -1 432.319 16.0471   1
   9  -6  -3 2.08598 7.22710  -2
  -9   6  -2 2.08598 7.22710   1
  -9  -6   4 617.969 17.9930  -2
   9   6   3 617.969 17.9930   1
   9  -6  -5 50.4368 8.39833  -2
  -9   6  -4 50.4368 8.39833   1
  -9  -6   6 242.178 18.5346  -2
   9   6   5 242.178 18.5346   1
  -9  -6   7 296.484 18.2683  -2
   9   6   6 296.484 18.2683   1
  -9  -6   8 136.783 12.3283  -2
   9   6   7 136.783 12.3283   1
  -9  -6   9 165.913 15.4791  -2
   9   6   8 165.913 15.4791   1
  -9  -6  10 21.4398 9.55810  -2
   9   6   9 21.4398 9.55810   1
  -9  -6  11 220.997 18.1585  -2
   9   6  10 220.997 18.1585   1
  -9   6  12 3.31194 15.4040  -2
   9  -6  11 3.31194 15.4040   1
  -9  -6  13 24.0968 18.2075  -2
   9   6  12 24.0968 18.2075   1
   9   7  12 55.6048 17.9462  -2
  -9  -7  13 55.6048 17.9462   1
  -9   7 -11 87.8199 16.8125  -2
   9  -7 -12 87.8199 16.8125   1
   9   7  10 25.0968 13.1685  -2
  -9  -7  11 25.0968 13.1685   1
   9   7   9 102.054 15.2156  -2
  -9  -7  10 102.054 15.2156   1
   9   7   8-2.14661 10.8835  -2
  -9  -7   9-2.14661 10.8835   1
   9   7   7 112.663 15.1789  -2
  -9  -7   8 112.663 15.1789   1
   9   7   6 239.129 17.6085  -2
  -9  -7   7 239.129 17.6085   1
   9  -7   5 78.5867 9.90186  -2
  -9   7   6 78.5867 9.90186   1
   9  -7   4 334.799 13.9441  -2
  -9   7   5 334.799 13.9441   1
  -9   7  -3 31.9172 9.22692  -2
   9  -7  -4 31.9172 9.22692   1
   9   7   2 611.699 18.5289  -2
  -9  -7   3 611.699 18.5289   1
   9   7   1 49.0131 8.60437  -2
  -9  -7   2 49.0131 8.60437   1
  -9  -7   0 178.203 11.2219  -2
   9   7  -1 178.203 11.2219   1
  -9  -7   1 151.989 9.30422  -2
   9   7   0 151.989 9.30422   1
  -9  -7   2 104.733 9.74253  -2
   9   7   1 104.733 9.74253   1
  -9  -7   3 148.063 16.7878  -2
   9   7   2 148.063 16.7878   1
  -9  -7   4 58.6581 9.73483  -2
   9   7   3 58.6581 9.73483   1
  -9  -7   5 173.198 15.5677  -2
   9   7   4 173.198 15.5677   1
  -9  -7   6 96.8700 14.1727  -2
   9   7   5 96.8700 14.1727   1
  -9  -7   7 73.0983 12.5950  -2
   9   7   6 73.0983 12.5950   1
  -9  -7   8 416.196 19.9616  -2
   9   7   7 416.196 19.9616   1
  -9  -7   9 14.7460 11.6887  -2
   9   7   8 14.7460 11.6887   1
   9   7 -10 331.365 17.3491  -2
  -9  -7  -9 331.365 17.3491   1
  -9  -7  11 0.95854 12.6391  -2
   9   7  10 0.95854 12.6391   1
  -9  -7  12 110.833 20.3405  -2
   9   7  11 110.833 20.3405   1
   9   8  12 175.388 32.5466  -2
  -9  -8  13 175.388 32.5466   1
   9   8  11-19.2943 16.1677  -2
  -9  -8  12-19.2943 16.1677   1
   9   8  10 128.772 18.6171  -2
  -9  -8  11 128.772 18.6171   1
   9   8   9 34.5234 12.5639  -2
  -9  -8  10 34.5234 12.5639   1
   9   8   8 404.567 19.9604  -2
  -9  -8   9 404.567 19.9604   1
   9   8   7 35.3566 12.5574  -2
  -9  -8   8 35.3566 12.5574   1
   9  -8   6 131.780 15.7967  -2
  -9   8   7 131.780 15.7967   1
   9   8   5 169.357 13.6790  -2
  -9  -8   6 169.357 13.6790   1
   9   8   4 122.285 10.8949  -2
  -9  -8   5 122.285 10.8949   1
   9   8   3 157.854 11.2807  -2
  -9  -8   4 157.854 11.2807   1
  -9   8  -2 35.6027 9.50483  -2
   9  -8  -3 35.6027 9.50483   1
  -9   8  -1 151.807 11.9343  -2
   9  -8  -2 151.807 11.9343   1
  -9  -8   0 239.141 12.2770  -2
   9   8  -1 239.141 12.2770   1
  -9  -8   1 47.6758 8.36884  -2
   9   8   0 47.6758 8.36884   1
  -9  -8   2 368.831 15.9004  -2
   9   8   1 368.831 15.9004   1
  -9  -8   3 13.4734 9.55402  -2
   9   8   2 13.4734 9.55402   1
  -9  -8   4 440.034 15.3922  -2
   9   8   3 440.034 15.3922   1
  -9  -8   5 38.4282 14.2880  -2
   9   8   4 38.4282 14.2880   1
  -9  -8   6 165.338 19.3330  -2
   9   8   5 165.338 19.3330   1
  -9  -8   7 103.342 13.6624  -2
   9   8   6 103.342 13.6624   1
  -9  -8   8 124.941 14.6338  -2
   9   8   7 124.941 14.6338   1
  -9  -8   9 119.211 13.3938  -2
   9   8   8 119.211 13.3938   1
  -9  -8  10 22.9355 11.1069  -2
   9   8   9 22.9355 11.1069   1
  -9   8  11 37.2761 16.3791  -2
   9  -8  10 37.2761 16.3791   1
  -9  -8  12 4.74930 17.2200  -2
   9   8  11 4.74930 17.2200   1
   9   9  11 26.3360 27.3049  -2
  -9  -9  12 26.3360 27.3049   1
   9   9  10-7.44404 24.8055  -2
  -9  -9  11-7.44404 24.8055   1
  -9  -9  -9 60.9532 18.4336  -2
   9   9 -10 60.9532 18.4336   1
  -9   9  -8 60.3486 14.9295  -2
   9  -9  -9 60.3486 14.9295   1
  -9   9  -7 93.5938 17.3316  -2
   9  -9  -8 93.5938 17.3316   1
   9   9   6 155.918 17.2694  -2
  -9  -9   7 155.918 17.2694   1
   9   9   5 32.7435 11.8678  -2
  -9  -9   6 32.7435 11.8678   1
   9   9   4 156.349 11.6804  -2
  -9  -9   5 156.349 11.6804   1
   9  -9   3 16.3561 8.21283  -2
  -9   9   4 16.3561 8.21283   1
   9   9   2 384.118 15.9048  -2
  -9  -9   3 384.118 15.9048   1
   9   9   1 20.9087 10.4218  -2
  -9  -9   2 20.9087 10.4218   1
  -9  -9   0 102.284 12.0915  -2
   9   9  -1 102.284 12.0915   1
  -9  -9   1 93.2287 12.7749  -2
   9   9   0 93.2287 12.7749   1
  -9  -9   2 137.763 11.0430  -2
   9   9   1 137.763 11.0430   1
  -9  -9   3 101.146 10.1012  -2
   9   9   2 101.146 10.1012   1
  -9   9   4 52.0614 13.4378  -2
   9  -9   3 52.0614 13.4378   1
  -9  -9   5 25.6167 14.5820  -2
   9   9   4 25.6167 14.5820   1
  -9  -9   6 95.3631 13.0776  -2
   9   9   5 95.3631 13.0776   1
  -9  -9   7 41.1979 14.7096  -2
   9   9   6 41.1979 14.7096   1
  -9  -9   8 251.601 15.9592  -2
   9   9   7 251.601 15.9592   1
  -9  -9   9 21.1326 11.4337  -2
   9   9   8 21.1326 11.4337   1
  -9  -9  10 231.874 20.9181  -2
   9   9   9 231.874 20.9181   1
  -9  -9  11-9.13875 15.7398  -2
   9   9  10-9.13875 15.7398   1
   9  10   9 1.97659 26.2814  -2
  -9 -10  10 1.97659 26.2814   1
   9  10   8 330.925 43.1325  -2
  -9 -10   9 330.925 43.1325   1
  -9 -10  -7 47.0753 14.2582  -2
   9  10  -8 47.0753 14.2582   1
  -9 -10  -6 103.754 17.0221  -2
   9  10  -7 103.754 17.0221   1
  -9 -10  -5 38.9776 13.2708  -2
   9  10  -6 38.9776 13.2708   1
  -9 -10  -4 61.6922 14.3879  -2
   9  10  -5 61.6922 14.3879   1
  -9 -10  -3 87.8263 10.4761  -2
   9  10  -4 87.8263 10.4761   1
   9  10   2 64.0756 10.9442  -2
  -9 -10   3 64.0756 10.9442   1
   9  10   1 74.8192 12.3588  -2
  -9 -10   2 74.8192 12.3588   1
  -9 -10   0 151.668 14.0852  -2
   9  10  -1 151.668 14.0852   1
  -9 -10   1 29.6100 10.3447  -2
   9  10   0 29.6100 10.3447   1
  -9 -10   2 234.083 12.7454  -2
   9  10   1 234.083 12.7454   1
  -9 -10   3 25.1081 8.62926  -2
   9  10   2 25.1081 8.62926   1
  -9 -10   4 395.596 15.3526  -2
   9  10   3 395.596 15.3526   1
  -9 -10   5 22.7429 10.1374  -2
   9  10   4 22.7429 10.1374   1
  -9 -10   6 101.551 12.2580  -2
   9  10   5 101.551 12.2580   1
  -9 -10   7 41.7144 11.9443  -2
   9  10   6 41.7144 11.9443   1
  -9 -10   8 87.9956 14.5337  -2
   9  10   7 87.9956 14.5337   1
  -9 -10   9 92.3090 18.0977  -2
   9  10   8 92.3090 18.0977   1
  -9 -10  10 9.24947 19.4013  -2
   9  10   9 9.24947 19.4013   1
   9  11   7 71.1990 32.8816  -2
  -9 -11   8 71.1990 32.8816   1
   9  11   6 159.051 35.3127  -2
  -9 -11   7 159.051 35.3127   1
  -9 -11  -5 32.1147 14.5187  -2
   9  11  -6 32.1147 14.5187   1
  -9 -11  -4 136.060 16.8345  -2
   9  11  -5 136.060 16.8345   1
  -9 -11  -3-7.60553 17.6113  -2
   9  11  -4-7.60553 17.6113   1
  -9 -11  -2 282.267 33.7152  -2
   9  11  -3 282.267 33.7152   1
   9  11   1 7.90856 20.9511  -2
  -9 -11   2 7.90856 20.9511   1
  -9 -11   0 93.2110 18.7869  -2
   9  11  -1 93.2110 18.7869   1
  -9 -11   1 5.61493 16.3207  -2
   9  11   0 5.61493 16.3207   1
  -9 -11   2 69.1409 14.4302  -2
   9  11   1 69.1409 14.4302   1
  -9 -11   3 52.1105 13.6398  -2
   9  11   2 52.1105 13.6398   1
  -9 -11   4 22.8911 11.4454  -2
   9  11   3 22.8911 11.4454   1
  -9 -11   5 30.4871 11.5691  -2
   9  11   4 30.4871 11.5691   1
  -9 -11   6 89.5919 15.6336  -2
   9  11   5 89.5919 15.6336   1
  -9 -11   7 75.3314 16.5976  -2
   9  11   6 75.3314 16.5976   1
  -9 -11   8 224.443 26.4736  -2
   9  11   7 224.443 26.4736   1
  -9 -11   9-14.6924 24.9198  -2
   9  11   8-14.6924 24.9198   1
   9  12   4 22.2594 27.1144  -2
  -9 -12   5 22.2594 27.1144   1
   9  12   3 33.6583 21.0227  -2
  -9 -12   4 33.6583 21.0227   1
   9  12   2 10.2997 21.8859  -2
  -9 -12   3 10.2997 21.8859   1
   9  12   1 21.6257 16.6670  -2
  -9 -12   2 21.6257 16.6670   1
  -9 -12   0 39.0082 17.9695  -2
   9  12  -1 39.0082 17.9695   1
  -9 -12   1 20.1984 17.4628  -2
   9  12   0 20.1984 17.4628   1
  -9 -12   2 107.861 15.9884  -2
   9  12   1 107.861 15.9884   1
  -9 -12   3 10.2161 12.3914  -2
   9  12   2 10.2161 12.3914   1
  -9 -12   4 119.985 16.2274  -2
   9  12   3 119.985 16.2274   1
  -9 -12   5 11.4411 14.9432  -2
   9  12   4 11.4411 14.9432   1
  -9 -12   6 50.1767 16.9302  -2
   9  12   5 50.1767 16.9302   1
  -9 -12   7 7.76014 27.7778  -2
   9  12   6 7.76014 27.7778   1
  -9 -13  -2 247.096 51.1712  -2
   9  13  -3 247.096 51.1712   1
  -9 -13  -1 30.0782 40.8888  -2
   9  13  -2 30.0782 40.8888   1
  -9 -13   3 18.5000 23.0311  -2
   9  13   2 18.5000 23.0311   1
  -9  13   4 61.6770 24.6924  -2
   9 -13   3 61.6770 24.6924   1
 -10   0  12 169.689 25.7835   1
 -10   0  10 185.664 25.3414   1
  10   0  -8 205.889 16.0504   1
  10   0  -6 215.230 13.8340   1
 -10   0   4 4.61899 10.7688   1
  10   0  -2 12.9671 7.37158   1
  10   0   0 890.627 25.3399   1
 -10   0  -2 316.619 13.9597   1
 -10   0  -4 955.664 18.7248   1
 -10   0  -6 117.249 21.5074   1
  10   0   8 197.124 16.8618   1
  10   0  10-3.22330 11.8303   1
  10   1  12 63.0307 33.6576  -2
 -10  -1  13 63.0307 33.6576   1
  10  -1  11 74.6615 15.8215  -2
 -10   1  12 74.6615 15.8215   1
  10  -1  10 89.2828 17.4656  -2
 -10   1  11 89.2828 17.4656   1
 -10   1  -9 16.3442 12.8880  -2
  10  -1 -10 16.3442 12.8880   1
  10  -1   8 54.2214 16.0075  -2
 -10   1   9 54.2214 16.0075   1
 -10   1  -7 75.8920 13.2689  -2
  10  -1  -8 75.8920 13.2689   1
 -10   1  -6 140.165 13.1816  -2
  10  -1  -7 140.165 13.1816   1
 -10   1  -5 756.848 21.9699  -2
  10  -1  -6 756.848 21.9699   1
  10   1   4 37.2902 8.04497  -2
 -10  -1   5 37.2902 8.04497   1
 -10   1  -3 447.167 14.3443  -2
  10  -1  -4 447.167 14.3443   1
 -10   1  -2 7.91697 9.60634  -2
  10  -1  -3 7.91697 9.60634   1
 -10   1  -1 758.202 22.8211  -2
  10  -1  -2 758.202 22.8211   1
 -10   1   0 96.0138 11.8541  -2
  10  -1  -1 96.0138 11.8541   1
 -10   1   1 335.726 13.7892  -2
  10  -1   0 335.726 13.7892   1
  10   1  -2 144.660 10.7817  -2
 -10  -1  -1 144.660 10.7817   1
  10  -1  -3 9.73943 7.57896  -2
 -10   1  -2 9.73943 7.57896   1
  10  -1  -4 160.607 10.3593  -2
 -10   1  -3 160.607 10.3593   1
  10  -1  -5 110.663 8.99715  -2
 -10   1  -4 110.663 8.99715   1
  10  -1  -6 237.691 11.0319  -2
 -10   1  -5 237.691 11.0319   1
  10  -1  -7 674.199 30.2965  -2
 -10   1  -6 674.199 30.2965   1
  10  -1  -8 14.8885 12.5225  -2
 -10   1  -7 14.8885 12.5225   1
 -10   1   9 358.587 20.2182  -2
  10  -1   8 358.587 20.2182   1
 -10   1  10 21.4645 11.8721  -2
  10  -1   9 21.4645 11.8721   1
 -10   1  11 539.842 24.0218  -2
  10  -1  10 539.842 24.0218   1
 -10   1  12 27.6509 15.4562  -2
  10  -1  11 27.6509 15.4562   1
  10  -2  11 264.498 34.3350  -2
 -10   2  12 264.498 34.3350   1
 -10   2 -10 24.8144 13.7017  -2
  10  -2 -11 24.8144 13.7017   1
  10  -2   9 339.995 22.5874  -2
 -10   2  10 339.995 22.5874   1
 -10   2  -8 9.10954 10.7306  -2
  10  -2  -9 9.10954 10.7306   1
 -10   2  -7 382.395 18.3708  -2
  10  -2  -8 382.395 18.3708   1
  10   2   6 97.1233 9.57001  -2
 -10  -2   7 97.1233 9.57001   1
  10  -2   5 392.615 13.5620  -2
 -10   2   6 392.615 13.5620   1
 -10  -2  -4 184.177 10.1285  -2
  10   2  -5 184.177 10.1285   1
  10   2   3 7.64532 6.75841  -2
 -10  -2   4 7.64532 6.75841   1
 -10  -2  -2 154.824 9.65380  -2
  10   2  -3 154.824 9.65380   1
 -10  -2  -1 46.9623 7.81514  -2
  10   2  -2 46.9623 7.81514   1
 -10  -2   0 186.079 10.8116  -2
  10   2  -1 186.079 10.8116   1
 -10  -2   1 857.286 18.6945  -2
  10   2   0 857.286 18.6945   1
  10   2  -2 22.8111 8.99850  -2
 -10  -2  -1 22.8111 8.99850   1
  10   2  -3 368.961 13.6988  -2
 -10  -2  -2 368.961 13.6988   1
  10   2  -4 7.07810 6.95334  -2
 -10  -2  -3 7.07810 6.95334   1
  10  -2  -5 641.444 16.6748  -2
 -10   2  -4 641.444 16.6748   1
  10   2  -6 82.3021 10.4690  -2
 -10  -2  -5 82.3021 10.4690   1
  10  -2  -7 166.324 18.5539  -2
 -10   2  -6 166.324 18.5539   1
 -10  -2   8 98.8479 13.2490  -2
  10   2   7 98.8479 13.2490   1
 -10   2   9 32.5785 9.94871  -2
  10  -2   8 32.5785 9.94871   1
 -10  -2  10 143.538 12.1516  -2
  10   2   9 143.538 12.1516   1
 -10  -2  11 34.8289 9.72681  -2
  10   2  10 34.8289 9.72681   1
 -10   2  12 108.300 17.1212  -2
  10  -2  11 108.300 17.1212   1
  10  -3  11 32.5912 19.9899  -2
 -10   3  12 32.5912 19.9899   1
 -10   3 -10 82.1093 16.6556  -2
  10  -3 -11 82.1093 16.6556   1
 -10   3  -9 37.5729 13.6568  -2
  10  -3 -10 37.5729 13.6568   1
  10  -3   8 217.672 20.0585  -2
 -10   3   9 217.672 20.0585   1
  10   3   7 34.5556 8.92905  -2
 -10  -3   8 34.5556 8.92905   1
  10   3   6 196.779 12.3367  -2
 -10  -3   7 196.779 12.3367   1
 -10  -3  -5 491.683 15.7928  -2
  10   3  -6 491.683 15.7928   1
  10  -3   4 36.7579 8.22314  -2
 -10   3   5 36.7579 8.22314   1
  10   3   3 404.238 13.8096  -2
 -10  -3   4 404.238 13.8096   1
 -10  -3  -2 8.55064 7.03703  -2
  10   3  -3 8.55064 7.03703   1
 -10  -3  -1 513.715 15.7297  -2
  10   3  -2 513.715 15.7297   1
 -10  -3   0 69.1922 8.67467  -2
  10   3  -1 69.1922 8.67467   1
 -10  -3   1 175.932 11.5473  -2
  10   3   0 175.932 11.5473   1
  10  -3  -2 222.115 12.2929  -2
 -10   3  -1 222.115 12.2929   1
  10   3  -3 8.68938 7.60201  -2
 -10  -3  -2 8.68938 7.60201   1
  10   3  -4 205.711 11.6039  -2
 -10  -3  -3 205.711 11.6039   1
  10  -3  -5 26.2553 8.37766  -2
 -10   3  -4 26.2553 8.37766   1
 -10  -3   6 145.908 10.4165  -2
  10   3   5 145.908 10.4165   1
 -10  -3   7 422.082 20.9555  -2
  10   3   6 422.082 20.9555   1
 -10  -3   8 42.5487 11.6084  -2
  10   3   7 42.5487 11.6084   1
 -10   3   9 282.994 15.6954  -2
  10  -3   8 282.994 15.6954   1
  10  -3 -10 19.7116 9.28294  -2
 -10   3  -9 19.7116 9.28294   1
 -10  -3  11 370.333 17.1682  -2
  10   3  10 370.333 17.1682   1
 -10   3  12 39.2532 15.0082  -2
  10  -3  11 39.2532 15.0082   1
 -10   4 -11 308.590 26.8840  -2
  10  -4 -12 308.590 26.8840   1
 -10   4 -10 27.0154 14.7384  -2
  10  -4 -11 27.0154 14.7384   1
 -10   4  -9 303.036 21.6410  -2
  10  -4 -10 303.036 21.6410   1
  10   4   8 16.3739 11.2220  -2
 -10  -4   9 16.3739 11.2220   1
  10   4   7 215.139 14.5863  -2
 -10  -4   8 215.139 14.5863   1
  10   4   6 92.7440 11.1582  -2
 -10  -4   7 92.7440 11.1582   1
  10   4   5 109.091 10.7268  -2
 -10  -4   6 109.091 10.7268   1
 -10   4  -4 261.027 12.6771  -2
  10  -4  -5 261.027 12.6771   1
 -10  -4  -3 17.4252 7.93722  -2
  10   4  -4 17.4252 7.93722   1
 -10   4  -2 358.117 13.9863  -2
  10  -4  -3 358.117 13.9863   1
 -10  -4  -1 12.2979 7.36625  -2
  10   4  -2 12.2979 7.36625   1
 -10  -4   0 220.797 11.7853  -2
  10   4  -1 220.797 11.7853   1
 -10  -4   1 418.117 15.1355  -2
  10   4   0 418.117 15.1355   1
  10   4  -2 67.0828 10.0046  -2
 -10  -4  -1 67.0828 10.0046   1
  10   4  -3 301.690 14.7741  -2
 -10  -4  -2 301.690 14.7741   1
  10   4  -4 23.3333 8.20293  -2
 -10  -4  -3 23.3333 8.20293   1
 -10  -4   5 554.050 18.2233  -2
  10   4   4 554.050 18.2233   1
 -10  -4   6 56.5249 13.6880  -2
  10   4   5 56.5249 13.6880   1
 -10  -4   7 94.7522 13.6760  -2
  10   4   6 94.7522 13.6760   1
  10   4  -8 141.934 15.5442  -2
 -10  -4  -7 141.934 15.5442   1
 -10   4   9 24.3335 9.48108  -2
  10  -4   8 24.3335 9.48108   1
 -10  -4  10 263.264 15.3867  -2
  10   4   9 263.264 15.3867   1
 -10  -4  11 23.1999 15.2886  -2
  10   4  10 23.1999 15.2886   1
 -10  -4  12 138.117 18.6367  -2
  10   4  11 138.117 18.6367   1
 -10  -4  13 141.048 38.0180  -2
  10   4  12 141.048 38.0180   1
 -10   5 -11 44.2399 21.6363  -2
  10  -5 -12 44.2399 21.6363   1
 -10   5 -10 86.2659 18.0547  -2
  10  -5 -11 86.2659 18.0547   1
 -10   5  -9 39.0854 15.5619  -2
  10  -5 -10 39.0854 15.5619   1
  10   5   8 234.651 18.1050  -2
 -10  -5   9 234.651 18.1050   1
  10   5   7 42.8241 12.6486  -2
 -10  -5   8 42.8241 12.6486   1
  10   5   6 229.423 13.5692  -2
 -10  -5   7 229.423 13.5692   1
  10   5   5 395.119 16.9546  -2
 -10  -5   6 395.119 16.9546   1
 -10  -5  -4 111.354 10.7544  -2
  10   5  -5 111.354 10.7544   1
 -10  -5  -3 349.233 13.6092  -2
  10   5  -4 349.233 13.6092   1
  10   5   2 15.8255 7.97121  -2
 -10  -5   3 15.8255 7.97121   1
 -10  -5  -1 363.411 15.1475  -2
  10   5  -2 363.411 15.1475   1
 -10  -5   0 53.7987 8.90832  -2
  10   5  -1 53.7987 8.90832   1
 -10  -5   1 48.8264 9.10265  -2
  10   5   0 48.8264 9.10265   1
 -10  -5   2 247.512 13.6298  -2
  10   5   1 247.512 13.6298   1
  10  -5  -3 2.82875 8.68896  -2
 -10   5  -2 2.82875 8.68896   1
  10   5  -4 376.960 15.7339  -2
 -10  -5  -3 376.960 15.7339   1
 -10  -5   5 49.0163 9.01475  -2
  10   5   4 49.0163 9.01475   1
 -10  -5   6 224.572 19.3427  -2
  10   5   5 224.572 19.3427   1
 -10  -5   7 246.373 20.8957  -2
  10   5   6 246.373 20.8957   1
 -10   5   8 78.6967 12.0378  -2
  10  -5   7 78.6967 12.0378   1
 -10  -5   9 121.439 12.1318  -2
  10   5   8 121.439 12.1318   1
 -10  -5  10 1.88534 10.1089  -2
  10   5   9 1.88534 10.1089   1
 -10   5  11 218.968 20.6902  -2
  10  -5  10 218.968 20.6902   1
 -10  -5  12 50.6102 23.4034  -2
  10   5  11 50.6102 23.4034   1
 -10  -5  13 25.3537 22.9871  -2
  10   5  12 25.3537 22.9871   1
 -10   6 -12 78.2518 24.7893  -2
  10  -6 -13 78.2518 24.7893   1
 -10   6 -11 119.107 27.1489  -2
  10  -6 -12 119.107 27.1489   1
  10  -6  10 25.1468 18.3959  -2
 -10   6  11 25.1468 18.3959   1
  10   6   9 91.5844 15.3141  -2
 -10  -6  10 91.5844 15.3141   1
  10   6   8 20.5069 12.9054  -2
 -10  -6   9 20.5069 12.9054   1
  10   6   7 174.419 17.1400  -2
 -10  -6   8 174.419 17.1400   1
  10   6   6 145.295 12.5403  -2
 -10  -6   7 145.295 12.5403   1
  10   6   5 71.9868 10.8212  -2
 -10  -6   6 71.9868 10.8212   1
 -10  -6  -4 279.657 14.2614  -2
  10   6  -5 279.657 14.2614   1
  10  -6   3 14.1046 8.18518  -2
 -10   6   4 14.1046 8.18518   1
  10  -6   2 468.048 15.8996  -2
 -10   6   3 468.048 15.8996   1
 -10  -6  -1 25.0758 8.24678  -2
  10   6  -2 25.0758 8.24678   1
 -10  -6   0 161.038 11.1625  -2
  10   6  -1 161.038 11.1625   1
 -10  -6   1 224.259 11.3537  -2
  10   6   0 224.259 11.3537   1
 -10  -6   2 64.6538 9.58445  -2
  10   6   1 64.6538 9.58445   1
  10   6  -3 190.698 13.3595  -2
 -10  -6  -2 190.698 13.3595   1
 -10  -6   4 25.7801 9.08827  -2
  10   6   3 25.7801 9.08827   1
 -10  -6   5 218.683 18.7700  -2
  10   6   4 218.683 18.7700   1
 -10  -6   6 85.1472 15.2983  -2
  10   6   5 85.1472 15.2983   1
 -10  -6   7 33.2423 13.1327  -2
  10   6   6 33.2423 13.1327   1
 -10  -6   8 241.087 16.0252  -2
  10   6   7 241.087 16.0252   1
 -10  -6   9 31.3384 12.0332  -2
  10   6   8 31.3384 12.0332   1
 -10  -6  10 203.635 16.3138  -2
  10   6   9 203.635 16.3138   1
 -10   6  11-0.06184 15.4639  -2
  10  -6  10-0.06184 15.4639   1
 -10  -6  12 80.0036 36.8068  -2
  10   6  11 80.0036 36.8068   1
 -10   7 -10 99.3350 28.5632  -2
  10  -7 -11 99.3350 28.5632   1
  10   7   9 25.5201 15.0973  -2
 -10  -7  10 25.5201 15.0973   1
  10  -7   8 293.399 21.0462  -2
 -10   7   9 293.399 21.0462   1
  10   7   7 63.0559 13.8490  -2
 -10  -7   8 63.0559 13.8490   1
  10   7   6 92.2316 13.9828  -2
 -10  -7   7 92.2316 13.9828   1
  10   7   5 158.913 12.7429  -2
 -10  -7   6 158.913 12.7429   1
  10   7   4 77.9773 10.4937  -2
 -10  -7   5 77.9773 10.4937   1
 -10  -7  -3 154.476 12.4001  -2
  10   7  -4 154.476 12.4001   1
 -10   7  -2 8.77127 8.39158  -2
  10  -7  -3 8.77127 8.39158   1
 -10  -7  -1 222.771 11.9984  -2
  10   7  -2 222.771 11.9984   1
 -10  -7   0 17.0362 9.13757  -2
  10   7  -1 17.0362 9.13757   1
 -10  -7   1 38.4871 8.83561  -2
  10   7   0 38.4871 8.83561   1
 -10  -7   2 318.818 13.2429  -2
  10   7   1 318.818 13.2429   1
 -10  -7   3 6.22090 9.01054  -2
  10   7   2 6.22090 9.01054   1
 -10  -7   4 419.476 23.6494  -2
  10   7   3 419.476 23.6494   1
 -10  -7   5 33.7475 12.6565  -2
  10   7   4 33.7475 12.6565   1
 -10  -7   6 119.044 16.4290  -2
  10   7   5 119.044 16.4290   1
 -10  -7   7 87.6604 15.8461  -2
  10   7   6 87.6604 15.8461   1
 -10  -7   8 79.6356 13.9794  -2
  10   7   7 79.6356 13.9794   1
 -10  -7   9 92.0853 13.3571  -2
  10   7   8 92.0853 13.3571   1
 -10  -7  10 5.19007 13.3255  -2
  10   7   9 5.19007 13.3255   1
 -10  -7  11 63.7770 16.6249  -2
  10   7  10 63.7770 16.6249   1
 -10  -7  12-27.7755 26.4940  -2
  10   7  11-27.7755 26.4940   1
  10   8   9 47.6850 17.3401  -2
 -10  -8  10 47.6850 17.3401   1
  10   8   8 0.57168 14.2777  -2
 -10  -8   9 0.57168 14.2777   1
  10   8   7 83.9028 14.4664  -2
 -10  -8   8 83.9028 14.4664   1
  10   8   6 168.378 16.9595  -2
 -10  -8   7 168.378 16.9595   1
 -10   8  -5 18.4379 10.1842  -2
  10  -8  -6 18.4379 10.1842   1
  10   8   4 277.284 13.9361  -2
 -10  -8   5 277.284 13.9361   1
  10   8   3 20.5528 8.96649  -2
 -10  -8   4 20.5528 8.96649   1
  10  -8   2 488.244 18.8137  -2
 -10   8   3 488.244 18.8137   1
  10   8   1 6.86575 9.03603  -2
 -10  -8   2 6.86575 9.03603   1
 -10   8   0 102.652 11.2439  -2
  10  -8  -1 102.652 11.2439   1
 -10  -8   1 45.0044 9.37032  -2
  10   8   0 45.0044 9.37032   1
 -10  -8   2 50.6644 13.7211  -2
  10   8   1 50.6644 13.7211   1
 -10  -8   3 123.337 14.9557  -2
  10   8   2 123.337 14.9557   1
 -10  -8   4 28.1201 13.3757  -2
  10   8   3 28.1201 13.3757   1
 -10  -8   5 134.185 19.3141  -2
  10   8   4 134.185 19.3141   1
 -10  -8   6 71.2619 16.7200  -2
  10   8   5 71.2619 16.7200   1
 -10  -8   7 63.0901 13.5310  -2
  10   8   6 63.0901 13.5310   1
 -10  -8   8 197.582 17.3044  -2
  10   8   7 197.582 17.3044   1
 -10  -8   9 8.85080 12.5676  -2
  10   8   8 8.85080 12.5676   1
 -10   8  10 195.941 21.0424  -2
  10  -8   9 195.941 21.0424   1
 -10  -8  11-2.06651 25.0885  -2
  10   8  10-2.06651 25.0885   1
  10   9   9 17.2413 28.5087  -2
 -10  -9  10 17.2413 28.5087   1
  10   9   8 344.429 43.9566  -2
 -10  -9   9 344.429 43.9566   1
  10   9   7 60.6008 17.5589  -2
 -10  -9   8 60.6008 17.5589   1
  10   9   6 95.1069 18.6271  -2
 -10  -9   7 95.1069 18.6271   1
  10   9   5 61.5079 15.1307  -2
 -10  -9   6 61.5079 15.1307   1
  10   9   4 54.7093 10.7818  -2
 -10  -9   5 54.7093 10.7818   1
  10   9   3 107.106 11.6744  -2
 -10  -9   4 107.106 11.6744   1
 -10  -9  -2 1.48250 9.75732  -2
  10   9  -3 1.48250 9.75732   1
  10   9   1 43.3076 9.48717  -2
 -10  -9   2 43.3076 9.48717   1
 -10  -9   0 74.1939 11.6044  -2
  10   9  -1 74.1939 11.6044   1
 -10  -9   1 32.1396 11.4345  -2
  10   9   0 32.1396 11.4345   1
 -10  -9   2 174.732 15.9318  -2
  10   9   1 174.732 15.9318   1
 -10  -9   3 0.70111 11.3396  -2
  10   9   2 0.70111 11.3396   1
 -10  -9   4 328.658 16.3262  -2
  10   9   3 328.658 16.3262   1
 -10  -9   5 12.4570 15.0173  -2
  10   9   4 12.4570 15.0173   1
 -10  -9   6 192.449 16.7760  -2
  10   9   5 192.449 16.7760   1
 -10  -9   7 52.0402 13.0289  -2
  10   9   6 52.0402 13.0289   1
 -10  -9   8 78.3724 13.8440  -2
  10   9   7 78.3724 13.8440   1
 -10   9   9 107.657 16.1367  -2
  10  -9   8 107.657 16.1367   1
 -10  -9  10 28.8737 16.8446  -2
  10   9   9 28.8737 16.8446   1
  10  10   7 12.3313 26.6243  -2
 -10 -10   8 12.3313 26.6243   1
  10  10   6 100.194 31.5116  -2
 -10 -10   7 100.194 31.5116   1
  10  10   5 24.5584 26.0268  -2
 -10 -10   6 24.5584 26.0268   1
  10  10   4 98.5407 19.6147  -2
 -10 -10   5 98.5407 19.6147   1
 -10 -10  -3 1.82884 8.49584  -2
  10  10  -4 1.82884 8.49584   1
 -10  10  -2 299.540 16.8709  -2
  10 -10  -3 299.540 16.8709   1
 -10 -10  -1 9.40668 10.0185  -2
  10  10  -2 9.40668 10.0185   1
 -10 -10   0 68.8711 13.6028  -2
  10  10  -1 68.8711 13.6028   1
 -10 -10   1 18.0553 11.3845  -2
  10  10   0 18.0553 11.3845   1
 -10 -10   2 68.0847 12.1871  -2
  10  10   1 68.0847 12.1871   1
 -10 -10   3 78.7923 12.4060  -2
  10  10   2 78.7923 12.4060   1
 -10 -10   4 16.4871 10.6013  -2
  10  10   3 16.4871 10.6013   1
 -10 -10   5 63.3747 15.1928  -2
  10  10   4 63.3747 15.1928   1
 -10 -10   6 27.7627 13.2922  -2
  10  10   5 27.7627 13.2922   1
 -10 -10   7 18.4353 15.6597  -2
  10  10   6 18.4353 15.6597   1
 -10 -10   8 127.270 19.2182  -2
  10  10   7 127.270 19.2182   1
  10  11   5-8.68185 28.6180  -2
 -10 -11   6-8.68185 28.6180   1
  10  11   4 23.7692 29.5598  -2
 -10 -11   5 23.7692 29.5598   1
 -10 -11  -3 47.9291 24.3111  -2
  10  11  -4 47.9291 24.3111   1
 -10 -11  -2-2.42407 22.2798  -2
  10  11  -3-2.42407 22.2798   1
 -10 -11  -1 4.64335 22.5412  -2
  10  11  -2 4.64335 22.5412   1
  10  11   0 25.1970 27.6526  -2
 -10 -11   1 25.1970 27.6526   1
  10  11  -1 44.8626 28.4259  -2
 -10 -11   0 44.8626 28.4259   1
  10  11  -2 100.284 36.5311  -2
 -10 -11  -1 100.284 36.5311   1
  10  11  -3 22.6489 30.6363  -2
 -10 -11  -2 22.6489 30.6363   1
 -10  11   4 119.160 29.5508  -2
  10 -11   3 119.160 29.5508   1
 -10  11   5 21.7735 24.6041  -2
  10 -11   4 21.7735 24.6041   1
 -10  12   3 41.4300 23.3206  -2
  10 -12   2 41.4300 23.3206   1
 -11   0  12 94.4900 36.6447   1
 -11   0  10-4.24337 30.7968   1
  11   0  -8 47.1310 15.7686   1
 -11   0   6 371.313 22.0661   1
 -11   0   4 365.793 20.1755   1
  11   0  -2 664.613 23.7946   1
  11   0   0 234.871 16.1473   1
 -11   0  -2 4.00534 10.7573   1
 -11   0  -4-2.73143 11.3459   1
 -11   0  -6 374.258 32.0112   1
  11   0   8 322.746 24.4030   1
 -11   0 -10 244.524 25.6433   1
  11  -1  11 188.874 28.2551  -2
 -11   1  12 188.874 28.2551   1
  11  -1  10-8.72776 21.1632  -2
 -11   1  11-8.72776 21.1632   1
  11  -1   9 203.134 28.4754  -2
 -11   1  10 203.134 28.4754   1
  11  -1   8 2.33122 17.4398  -2
 -11   1   9 2.33122 17.4398   1
 -11   1  -7 233.432 14.3931  -2
  11  -1  -8 233.432 14.3931   1
 -11   1  -6 48.6090 11.1704  -2
  11  -1  -7 48.6090 11.1704   1
  11  -1   5 104.824 13.4136  -2
 -11   1   6 104.824 13.4136   1
  11  -1   4 169.423 16.7716  -2
 -11   1   5 169.423 16.7716   1
  11  -1   3 1.47129 10.2870  -2
 -11   1   4 1.47129 10.2870   1
 -11   1  -2 79.2725 12.2619  -2
  11  -1  -3 79.2725 12.2619   1
 -11   1  -1 21.6924 10.2079  -2
  11  -1  -2 21.6924 10.2079   1
 -11   1   0 131.060 14.7456  -2
  11  -1  -1 131.060 14.7456   1
 -11   1   1 484.119 17.3553  -2
  11  -1   0 484.119 17.3553   1
  11   1  -2 8.90377 8.97473  -2
 -11  -1  -1 8.90377 8.97473   1
  11  -1  -3 372.443 15.3057  -2
 -11   1  -2 372.443 15.3057   1
  11  -1  -4 11.6381 8.33142  -2
 -11   1  -3 11.6381 8.33142   1
  11  -1  -5 606.523 16.9085  -2
 -11   1  -4 606.523 16.9085   1
  11  -1  -6 37.9630 9.75705  -2
 -11   1  -5 37.9630 9.75705   1
  11  -1  -7 119.156 17.5384  -2
 -11   1  -6 119.156 17.5384   1
  11  -1  -8 52.9123 16.0051  -2
 -11   1  -7 52.9123 16.0051   1
  11   1  -9 47.8034 14.0375  -2
 -11  -1  -8 47.8034 14.0375   1
 -11   1  10 67.4103 14.0133  -2
  11  -1   9 67.4103 14.0133   1
  11  -1 -11 7.22889 13.2122  -2
 -11   1 -10 7.22889 13.2122   1
  11  -2  11 31.7361 23.7857  -2
 -11   2  12 31.7361 23.7857   1
  11  -2  10 157.302 39.1993  -2
 -11   2  11 157.302 39.1993   1
  11  -2   9-13.5420 16.7392  -2
 -11   2  10-13.5420 16.7392   1
  11  -2   8 64.1490 16.2231  -2
 -11   2   9 64.1490 16.2231   1
 -11  -2  -7 12.1957 10.9077  -2
  11   2  -8 12.1957 10.9077   1
 -11  -2  -6 71.5385 11.3230  -2
  11   2  -7 71.5385 11.3230   1
  11  -2   5 291.547 14.6300  -2
 -11   2   6 291.547 14.6300   1
  11  -2   4 10.0583 9.42317  -2
 -11   2   5 10.0583 9.42317   1
  11   2   3 293.447 14.1020  -2
 -11  -2   4 293.447 14.1020   1
 -11   2  -2 18.5234 10.1213  -2
  11  -2  -3 18.5234 10.1213   1
 -11  -2  -1 423.394 15.9932  -2
  11   2  -2 423.394 15.9932   1
 -11  -2   0 63.5301 10.6527  -2
  11   2  -1 63.5301 10.6527   1
 -11  -2   1 199.731 13.2495  -2
  11   2   0 199.731 13.2495   1
 -11  -2   2 128.522 10.7267  -2
  11   2   1 128.522 10.7267   1
  11  -2  -3 38.5501 9.43255  -2
 -11   2  -2 38.5501 9.43255   1
  11  -2  -4 95.2010 10.1152  -2
 -11   2  -3 95.2010 10.1152   1
  11  -2  -5 8.61240 8.01078  -2
 -11   2  -4 8.61240 8.01078   1
  11  -2  -6 93.2242 16.8935  -2
 -11   2  -5 93.2242 16.8935   1
  11  -2  -7 171.074 19.3546  -2
 -11   2  -6 171.074 19.3546   1
  11  -2  -8 33.6761 14.4017  -2
 -11   2  -7 33.6761 14.4017   1
 -11   2   9 187.448 15.6162  -2
  11  -2   8 187.448 15.6162   1
 -11   2  10 1.99344 11.2293  -2
  11  -2   9 1.99344 11.2293   1
  11  -2 -11 436.220 35.6250  -2
 -11   2 -10 436.220 35.6250   1
  11  -3  10 23.0636 34.2292  -2
 -11   3  11 23.0636 34.2292   1
  11  -3   9 202.984 19.7571  -2
 -11   3  10 202.984 19.7571   1
  11  -3   8 16.1777 14.8745  -2
 -11   3   9 16.1777 14.8745   1
 -11  -3  -7 250.842 15.7290  -2
  11   3  -8 250.842 15.7290   1
 -11  -3  -6 25.3551 10.2650  -2
  11   3  -7 25.3551 10.2650   1
  11  -3   5 113.509 12.0635  -2
 -11   3   6 113.509 12.0635   1
  11  -3   4 201.401 13.5173  -2
 -11   3   5 201.401 13.5173   1
  11  -3   3 10.5577 9.15843  -2
 -11   3   4 10.5577 9.15843   1
  11   3   2 262.740 12.8113  -2
 -11  -3   3 262.740 12.8113   1
 -11  -3  -1 23.1386 9.50398  -2
  11   3  -2 23.1386 9.50398   1
 -11  -3   0 154.542 11.8554  -2
  11   3  -1 154.542 11.8554   1
 -11  -3   1 435.871 16.7534  -2
  11   3   0 435.871 16.7534   1
 -11  -3   2 52.1088 9.39339  -2
  11   3   1 52.1088 9.39339   1
  11   3  -3 404.591 17.1325  -2
 -11  -3  -2 404.591 17.1325   1
  11  -3  -4 7.45570 8.74763  -2
 -11   3  -3 7.45570 8.74763   1
  11  -3  -5 523.518 15.8078  -2
 -11   3  -4 523.518 15.8078   1
  11  -3  -6 22.2593 15.2724  -2
 -11   3  -5 22.2593 15.2724   1
  11  -3  -7 51.7523 16.1732  -2
 -11   3  -6 51.7523 16.1732   1
  11  -3  -8 111.593 17.2728  -2
 -11   3  -7 111.593 17.2728   1
 -11   3   9 30.2965 11.8384  -2
  11  -3   8 30.2965 11.8384   1
 -11   3  10 117.659 13.7675  -2
  11  -3   9 117.659 13.7675   1
  11  -3 -11 12.2711 16.2780  -2
 -11   3 -10 12.2711 16.2780   1
  11  -4  10 118.100 39.6013  -2
 -11   4  11 118.100 39.6013   1
 -11   4  -9-0.06152 16.9151  -2
  11  -4 -10-0.06152 16.9151   1
  11  -4   8 130.253 18.4978  -2
 -11   4   9 130.253 18.4978   1
 -11   4  -7 12.2232 14.1164  -2
  11  -4  -8 12.2232 14.1164   1
 -11  -4  -6 72.8423 13.4231  -2
  11   4  -7 72.8423 13.4231   1
  11  -4   5 236.508 15.0865  -2
 -11   4   6 236.508 15.0865   1
  11  -4   4 20.4568 10.0986  -2
 -11   4   5 20.4568 10.0986   1
  11   4   3 200.203 12.1166  -2
 -11  -4   4 200.203 12.1166   1
  11   4   2 5.10249 8.42365  -2
 -11  -4   3 5.10249 8.42365   1
 -11  -4  -1 387.802 14.3113  -2
  11   4  -2 387.802 14.3113   1
 -11  -4   0 57.8265 10.0494  -2
  11   4  -1 57.8265 10.0494   1
 -11  -4   1 105.768 11.6466  -2
  11   4   0 105.768 11.6466   1
 -11  -4   2 165.025 11.4659  -2
  11   4   1 165.025 11.4659   1
  11   4  -3 7.90046 9.35180  -2
 -11  -4  -2 7.90046 9.35180   1
  11   4  -4 175.031 12.8438  -2
 -11  -4  -3 175.031 12.8438   1
  11  -4  -5 21.9446 19.3423  -2
 -11   4  -4 21.9446 19.3423   1
  11  -4  -6 118.682 18.4874  -2
 -11   4  -5 118.682 18.4874   1
  11  -4  -7 126.427 18.4319  -2
 -11   4  -6 126.427 18.4319   1
  11  -4  -8 24.5515 14.9798  -2
 -11   4  -7 24.5515 14.9798   1
 -11   4   9 133.507 14.4117  -2
  11  -4   8 133.507 14.4117   1
 -11   4  10-0.08070 11.0491  -2
  11  -4   9-0.08070 11.0491   1
  11   4 -11 127.934 53.8366  -2
 -11  -4 -10 127.934 53.8366   1
 -11   5 -10 31.0089 18.3854  -2
  11  -5 -11 31.0089 18.3854   1
 -11   5  -9 79.1936 20.4704  -2
  11  -5 -10 79.1936 20.4704   1
  11  -5   8 4.49437 17.4226  -2
 -11   5   9 4.49437 17.4226   1
  11  -5   7 117.549 18.9058  -2
 -11   5   8 117.549 18.9058   1
 -11   5  -6 71.2422 13.7863  -2
  11  -5  -7 71.2422 13.7863   1
  11  -5   5 90.4699 13.7841  -2
 -11   5   6 90.4699 13.7841   1
  11   5   4 173.519 12.8148  -2
 -11  -5   5 173.519 12.8148   1
  11   5   3-3.54952 9.01409  -2
 -11  -5   4-3.54952 9.01409   1
  11  -5   2 301.381 13.5341  -2
 -11   5   3 301.381 13.5341   1
 -11  -5  -1 42.5931 9.21973  -2
  11   5  -2 42.5931 9.21973   1
 -11  -5   0 244.061 12.5114  -2
  11   5  -1 244.061 12.5114   1
 -11  -5   1 340.345 15.4793  -2
  11   5   0 340.345 15.4793   1
 -11  -5   2 138.901 12.0399  -2
  11   5   1 138.901 12.0399   1
 -11  -5   3 191.432 12.6671  -2
  11   5   2 191.432 12.6671   1
  11   5  -4-14.4795 18.3304  -2
 -11  -5  -3-14.4795 18.3304   1
  11  -5  -5 283.239 31.8073  -2
 -11   5  -4 283.239 31.8073   1
  11  -5  -6 68.8767 22.2654  -2
 -11   5  -5 68.8767 22.2654   1
  11  -5  -7 102.344 17.8694  -2
 -11   5  -6 102.344 17.8694   1
  11   5   7 7.65568 23.8751   1
 -11   5   8 141.869 15.1064  -2
  11  -5   7 141.869 15.1064   1
 -11   5   9 28.0303 11.9771  -2
  11  -5   8 28.0303 11.9771   1
  11   5 -10 56.1038 38.9742  -2
 -11  -5  -9 56.1038 38.9742   1
 -11   6 -10-7.39958 22.2284  -2
  11  -6 -11-7.39958 22.2284   1
 -11   6  -9 12.5046 18.4431  -2
  11  -6 -10 12.5046 18.4431   1
 -11   6  -8 157.430 23.3095  -2
  11  -6  -9 157.430 23.3095   1
  11  -6   7 39.9786 20.0183  -2
 -11   6   8 39.9786 20.0183   1
 -11   6  -6 87.0032 16.8124  -2
  11  -6  -7 87.0032 16.8124   1
 -11  -6  -5 192.436 14.1347  -2
  11   6  -6 192.436 14.1347   1
  11   6   4 83.0475 11.2179  -2
 -11  -6   5 83.0475 11.2179   1
  11   6   3 96.2794 11.5597  -2
 -11  -6   4 96.2794 11.5597   1
  11   6   2-3.40258 9.42281  -2
 -11  -6   3-3.40258 9.42281   1
  11   6   1 68.9727 10.2546  -2
 -11  -6   2 68.9727 10.2546   1
 -11  -6   0 105.355 10.6111  -2
  11   6  -1 105.355 10.6111   1
 -11  -6   1 49.6318 10.0798  -2
  11   6   0 49.6318 10.0798   1
 -11  -6   2 135.703 12.1392  -2
  11   6   1 135.703 12.1392   1
 -11  -6   3 31.8076 11.0196  -2
  11   6   2 31.8076 11.0196   1
  11   6  -4 187.900 28.1915  -2
 -11  -6  -3 187.900 28.1915   1
  11   6  -5 45.5277 21.5759  -2
 -11  -6  -4 45.5277 21.5759   1
  11  -6  -6 117.760 25.8273  -2
 -11   6  -5 117.760 25.8273   1
  11   6   6-8.86631 27.0200   1
  11  -6  -7 142.709 25.7825  -2
 -11   6  -6 142.709 25.7825   1
  11   6   7-2.55225 25.1947   1
 -11   6   8 136.013 18.0583  -2
  11  -6   7 136.013 18.0583   1
 -11   6   9 99.6101 16.3265  -2
  11  -6   8 99.6101 16.3265   1
  11   6 -10 20.5473 40.6668  -2
 -11  -6  -9 20.5473 40.6668   1
 -11   7  -8 22.6503 19.6532  -2
  11  -7  -9 22.6503 19.6532   1
  11  -7   7 69.6485 21.1875  -2
 -11   7   8 69.6485 21.1875   1
  11  -7   6 123.199 23.3747  -2
 -11   7   7 123.199 23.3747   1
  11   7   5 43.3179 11.4415  -2
 -11  -7   6 43.3179 11.4415   1
  11   7   4 186.182 14.4963  -2
 -11  -7   5 186.182 14.4963   1
  11   7   3-4.98017 9.15855  -2
 -11  -7   4-4.98017 9.15855   1
  11   7   2 295.890 15.2513  -2
 -11  -7   3 295.890 15.2513   1
  11   7   1 34.4218 10.2523  -2
 -11  -7   2 34.4218 10.2523   1
 -11  -7   0 154.386 11.6737  -2
  11   7  -1 154.386 11.6737   1
 -11  -7   1 130.085 11.2304  -2
  11   7   0 130.085 11.2304   1
 -11  -7   2 119.869 12.1408  -2
  11   7   1 119.869 12.1408   1
 -11  -7   3 95.1910 14.9039  -2
  11   7   2 95.1910 14.9039   1
 -11  -7   4 8.10471 15.5234  -2
  11   7   3 8.10471 15.5234   1
  11   7   4-7.29230 35.0870   1
  11   7  -5 153.178 27.4344  -2
 -11  -7  -4 153.178 27.4344   1
 -11  -7   6 18.2756 18.8928  -2
  11   7   5 18.2756 18.8928   1
  11   7   6-5.91371 28.7431   1
 -11  -7   7 30.3054 17.4343  -2
  11   7   6 30.3054 17.4343   1
  11   7   7 17.3702 27.7699   1
 -11   7   8 141.457 22.8425  -2
  11  -7   7 141.457 22.8425   1
  11   7  -9 10.2820 20.4243  -2
 -11  -7  -8 10.2820 20.4243   1
  11   8   6 97.4260 19.9273  -2
 -11  -8   7 97.4260 19.9273   1
  11   8   5 70.7333 14.2864  -2
 -11  -8   6 70.7333 14.2864   1
  11   8   4 78.1821 12.3578  -2
 -11  -8   5 78.1821 12.3578   1
  11   8   3 94.8222 11.9244  -2
 -11  -8   4 94.8222 11.9244   1
  11  -8   2 2.69111 9.80177  -2
 -11   8   3 2.69111 9.80177   1
  11   8   1 68.6821 11.4772  -2
 -11  -8   2 68.6821 11.4772   1
  11   8   0 48.6236 10.7243  -2
 -11  -8   1 48.6236 10.7243   1
 -11  -8   1 9.56079 9.44991  -2
  11   8   0 9.56079 9.44991   1
 -11  -8   2 129.821 15.1010  -2
  11   8   1 129.821 15.1010   1
  11   8   2-38.9857 31.4722   1
 -11  -8   3-2.67654 12.2343  -2
  11   8   2-2.67654 12.2343   1
  11   8   3 20.3709 36.1340   1
 -11  -8   4 273.154 18.7887  -2
  11   8   3 273.154 18.7887   1
  11   8   4 48.5750 35.7554   1
  11   8  -5 30.1054 21.8613  -2
 -11  -8  -4 30.1054 21.8613   1
  11   8   5 9.57602 31.5173   1
  11   8  -6 164.948 48.5744  -2
 -11  -8  -5 164.948 48.5744   1
  11   8   6-8.46419 26.3902   1
 -11   8   7 89.0472 20.9593  -2
  11  -8   6 89.0472 20.9593   1
  11   8   7 61.9170 29.2081   1
 -11   8   8 120.962 25.5087  -2
  11  -8   7 120.962 25.5087   1
  11   9   6 32.8908 27.3473  -2
 -11  -9   7 32.8908 27.3473   1
  11   9   5 22.7738 25.8539  -2
 -11  -9   6 22.7738 25.8539   1
 -11  -9  -4 126.217 16.3346  -2
  11   9  -5 126.217 16.3346   1
  11   9   3 4.42873 12.2707  -2
 -11  -9   4 4.42873 12.2707   1
  11   9   2 219.038 16.3168  -2
 -11  -9   3 219.038 16.3168   1
 -11   9  -1-0.30365 11.1539  -2
  11  -9  -2-0.30365 11.1539   1
  11   9  -1-40.7568 32.5559   1
  11   9   0 105.667 14.0119  -2
 -11  -9   1 105.667 14.0119   1
  11   9   0 9.92414 40.8343   1
 -11   9   1 42.0067 12.7022  -2
  11  -9   0 42.0067 12.7022   1
  11   9   1-18.8457 36.7190   1
 -11  -9   2 71.1926 15.3521  -2
  11   9   1 71.1926 15.3521   1
  11   9   2 79.9663 44.5470   1
 -11  -9   3 92.9740 15.7615  -2
  11   9   2 92.9740 15.7615   1
  11   9   3 35.9800 37.1991   1
 -11  -9   4 7.69425 13.9052  -2
  11   9   3 7.69425 13.9052   1
  11   9   4 10.6548 32.2721   1
 -11  -9   5 47.4102 15.1640  -2
  11   9   4 47.4102 15.1640   1
  11   9   5 3.18417 28.0411   1
 -11   9   6 28.9233 17.7455  -2
  11  -9   5 28.9233 17.7455   1
  11   9   6 33.9664 27.9311   1
 -11   9   7 28.6687 21.2358  -2
  11  -9   6 28.6687 21.2358   1
  11   9   7 54.2408 26.6853   1
  11  10   5 32.5067 27.2858  -2
 -11 -10   6 32.5067 27.2858   1
  11  10   4 24.7955 26.6822  -2
 -11 -10   5 24.7955 26.6822   1
  11  10  -4-18.7834 32.4361   1
  11  10   3 39.2268 17.9014  -2
 -11 -10   4 39.2268 17.9014   1
  11  10   2 5.99049 17.2082  -2
 -11 -10   3 5.99049 17.2082   1
  11  10   1 16.9742 17.4925  -2
 -11 -10   2 16.9742 17.4925   1
  11  10   0 31.4117 17.0021  -2
 -11 -10   1 31.4117 17.0021   1
  11  10  -1 30.5970 18.4933  -2
 -11 -10   0 30.5970 18.4933   1
  11  10  -2 155.721 22.7958  -2
 -11 -10  -1 155.721 22.7958   1
 -11 -10   3-1.52446 17.3836  -2
  11  10   2-1.52446 17.3836   1
 -11 -10   4 182.356 29.4319  -2
  11  10   3 182.356 29.4319   1
 -11 -10   5 18.3568 28.6920  -2
  11  10   4 18.3568 28.6920   1
 -12   0   8 99.2339 40.2316   1
 -12   0   6 115.449 18.9561   1
 -12   0   4 24.2701 15.0798   1
  12   0  -2 27.9370 13.0264   1
  12   0   0 283.657 18.1369   1
 -12   0  -2 237.062 19.9440   1
 -12   0  -4 365.836 22.0583   1
 -12   0  -6 160.152 30.6819   1
 -12   0  -8 66.9503 25.2276   1
  12  -1   7 15.7923 18.4403  -2
 -12   1   8 15.7923 18.4403   1
 -12   1  -6 26.6067 13.1975  -2
  12  -1  -7 26.6067 13.1975   1
  12  -1   5 276.810 16.9092  -2
 -12   1   6 276.810 16.9092   1
  12  -1   4 10.9836 11.7869  -2
 -12   1   5 10.9836 11.7869   1
  12  -1   3 283.239 16.2874  -2
 -12   1   4 283.239 16.2874   1
  12  -1   2 19.3956 11.4657  -2
 -12   1   3 19.3956 11.4657   1
 -12   1   2 325.872 37.3160   1
 -12   1  -1 438.268 20.9612  -2
  12  -1  -2 438.268 20.9612   1
 -12   1   0 62.7372 13.5526  -2
  12  -1  -1 62.7372 13.5526   1
 -12  -1   0 205.775 18.6106   1
 -12   1   1 198.329 20.4316  -2
  12  -1   0 198.329 20.4316   1
 -12   1   2 92.7181 11.2588  -2
  12  -1   1 92.7181 11.2588   1
  12  -1  -3 11.4957 10.1279  -2
 -12   1  -2 11.4957 10.1279   1
  12  -1  -4 98.7671 11.0471  -2
 -12   1  -3 98.7671 11.0471   1
  12  -1  -5 17.9475 11.8761  -2
 -12   1  -4 17.9475 11.8761   1
  12  -1  -6 122.029 20.0892  -2
 -12   1  -5 122.029 20.0892   1
  12  -1  -7 96.2053 18.9405  -2
 -12   1  -6 96.2053 18.9405   1
  12  -1  -8 47.1654 16.8193  -2
 -12   1  -7 47.1654 16.8193   1
  12  -1  -9 65.4946 16.8336  -2
 -12   1  -8 65.4946 16.8336   1
  12  -1 -10 0.76055 14.8762  -2
 -12   1  -9 0.76055 14.8762   1
  12  -2   7 159.096 27.1255  -2
 -12   2   8 159.096 27.1255   1
 -12  -2  -6 21.8055 10.9974  -2
  12   2  -7 21.8055 10.9974   1
  12  -2   5 93.7484 13.7292  -2
 -12   2   6 93.7484 13.7292   1
  12  -2   4 125.009 13.7534  -2
 -12   2   5 125.009 13.7534   1
  12  -2   3 9.13595 11.6303  -2
 -12   2   4 9.13595 11.6303   1
 -12  -2   3 8.73266 24.3189   1
  12  -2   2 96.2830 12.9287  -2
 -12   2   3 96.2830 12.9287   1
 -12  -2   2 37.3717 18.4964   1
 -12  -2  -1 14.7189 12.8083  -2
  12   2  -2 14.7189 12.8083   1
 -12  -2   1 42.5165 14.4288   1
 -12  -2   0 135.907 16.5945  -2
  12   2  -1 135.907 16.5945   1
 -12  -2   0 352.919 22.1184   1
 -12  -2   1 372.734 20.8707  -2
  12   2   0 372.734 20.8707   1
 -12  -2  -1 21.1005 11.6573   1
 -12  -2   2 24.6424 12.1510  -2
  12   2   1 24.6424 12.1510   1
 -12  -2  -2 229.907 19.5932   1
 -12  -2   3 256.303 15.9594  -2
  12   2   2 256.303 15.9594   1
  12  -2  -4 14.3876 9.65382  -2
 -12   2  -3 14.3876 9.65382   1
  12  -2  -5 427.436 18.9671  -2
 -12   2  -4 427.436 18.9671   1
  12  -2  -6-0.98937 17.3325  -2
 -12   2  -5-0.98937 17.3325   1
  12  -2  -7 70.6437 18.4217  -2
 -12   2  -6 70.6437 18.4217   1
  12  -2  -8 35.1896 17.3762  -2
 -12   2  -7 35.1896 17.3762   1
  12  -2  -9 14.9669 16.0380  -2
 -12   2  -8 14.9669 16.0380   1
  12  -2 -10 44.6237 15.7184  -2
 -12   2  -9 44.6237 15.7184   1
  12  -3   7-2.23872 17.3899  -2
 -12   3   8-2.23872 17.3899   1
 -12  -3  -6 54.6691 12.9507  -2
  12   3  -7 54.6691 12.9507   1
  12  -3   5 127.389 13.0008  -2
 -12   3   6 127.389 13.0008   1
  12  -3   4 29.1218 10.8071  -2
 -12   3   5 29.1218 10.8071   1
  12  -3   3 174.550 14.5713  -2
 -12   3   4 174.550 14.5713   1
 -12  -3   3-9.66727 16.8230   1
  12  -3   2 1.82407 12.5621  -2
 -12   3   3 1.82407 12.5621   1
 -12  -3  -1 310.518 15.9481  -2
  12   3  -2 310.518 15.9481   1
 -12  -3   0 55.4009 12.4386  -2
  12   3  -1 55.4009 12.4386   1
 -12  -3   0 152.066 19.9206   1
 -12  -3   1 147.714 16.7677  -2
  12   3   0 147.714 16.7677   1
 -12  -3  -1 55.2574 13.0416   1
 -12  -3   2 113.386 14.0361  -2
  12   3   1 113.386 14.0361   1
 -12  -3  -2 32.7885 13.1678   1
 -12  -3   3 34.4018 11.2319  -2
  12   3   2 34.4018 11.2319   1
 -12  -3  -3 39.3683 23.8004   1
  12  -3  -4 117.188 17.2858  -2
 -12   3  -3 117.188 17.2858   1
 -12  -3  -4-8.69897 18.1603   1
  12  -3  -5-11.0374 19.9928  -2
 -12   3  -4-11.0374 19.9928   1
 -12  -3  -5 46.7115 22.0150   1
  12  -3  -6 47.1989 21.4285  -2
 -12   3  -5 47.1989 21.4285   1
 -12  -3  -6 55.7881 21.0712   1
  12  -3  -7 136.569 24.5429  -2
 -12   3  -6 136.569 24.5429   1
  12  -3  -8 49.0116 15.8903  -2
 -12   3  -7 49.0116 15.8903   1
  12  -3  -9 120.829 17.1877  -2
 -12   3  -8 120.829 17.1877   1
  12  -3 -10 0.40625 19.1598  -2
 -12   3  -9 0.40625 19.1598   1
  12  -4  -9-6.40935 16.7486   1
 -12   4  -7 99.9199 25.1122  -2
  12  -4  -8 99.9199 25.1122   1
 -12  -4   7-19.8253 21.8904   1
  12  -4   6 7.92838 19.6156  -2
 -12   4   7 7.92838 19.6156   1
 -12  -4   6 44.6533 26.4724   1
  12  -4   5 58.4651 12.6216  -2
 -12   4   6 58.4651 12.6216   1
 -12  -4   5 45.8872 25.0471   1
  12  -4   4 137.105 13.9285  -2
 -12   4   5 137.105 13.9285   1
 -12  -4   4 2.20560 20.5304   1
  12  -4   3-0.64871 10.9827  -2
 -12   4   4-0.64871 10.9827   1
 -12  -4   3 186.994 27.6400   1
  12  -4   2 209.579 16.9000  -2
 -12   4   3 209.579 16.9000   1
 -12  -4   2 17.4914 17.8853   1
 -12   4  -1 21.8847 12.2193  -2
  12  -4  -2 21.8847 12.2193   1
 -12  -4   1 56.3158 18.6651   1
 -12  -4   0 110.710 14.5553  -2
  12   4  -1 110.710 14.5553   1
 -12  -4   0 189.558 21.7389   1
 -12  -4   1 160.212 17.0472  -2
  12   4   0 160.212 17.0472   1
 -12  -4  -1 69.6251 15.5291   1
 -12  -4   2 36.4041 12.3882  -2
  12   4   1 36.4041 12.3882   1
 -12  -4   3 173.035 14.1555  -2
  12   4   2 173.035 14.1555   1
  12  -4  -4 24.5249 14.0293  -2
 -12   4  -3 24.5249 14.0293   1
 -12  -4  -4 181.772 30.7332   1
  12  -4  -5 278.455 29.1042  -2
 -12   4  -4 278.455 29.1042   1
 -12  -4  -5 10.3835 20.5122   1
  12  -4  -6 20.7107 21.0514  -2
 -12   4  -5 20.7107 21.0514   1
 -12  -4  -6 80.1577 23.6249   1
  12   4  -7 76.6255 22.8439  -2
 -12  -4  -6 76.6255 22.8439   1
 -12  -4  -7 44.1357 20.1493   1
  12   4  -8 121.265 23.3750  -2
 -12  -4  -7 121.265 23.3750   1
  12   4  -9 31.6773 19.9840  -2
 -12  -4  -8 31.6773 19.9840   1
  12   4 -10 105.593 46.2093  -2
 -12  -4  -9 105.593 46.2093   1
 -12   5  -8-24.9643 23.9550  -2
  12  -5  -9-24.9643 23.9550   1
 -12   5  -7 3.17783 22.2887  -2
  12  -5  -8 3.17783 22.2887   1
 -12   5  -6-0.00185 25.0097  -2
  12  -5  -7-0.00185 25.0097   1
 -12  -5   6 47.8860 28.0906   1
 -12  -5  -5 62.3280 14.7120  -2
  12   5  -6 62.3280 14.7120   1
 -12  -5   5-7.46688 21.0725   1
  12  -5   4 22.8710 11.8444  -2
 -12   5   5 22.8710 11.8444   1
 -12  -5   4 69.9638 25.5765   1
  12  -5   3 85.1670 13.5428  -2
 -12   5   4 85.1670 13.5428   1
 -12  -5   3-20.1230 17.6181   1
  12  -5   2-2.12067 11.1760  -2
 -12   5   3-2.12067 11.1760   1
 -12  -5   2 172.835 25.8833   1
  12  -5   1 200.174 16.6492  -2
 -12   5   2 200.174 16.6492   1
 -12  -5   1 45.4949 17.9803   1
 -12  -5   0 34.6441 12.9520  -2
  12   5  -1 34.6441 12.9520   1
 -12  -5   0 86.0090 18.7698   1
 -12  -5   1 63.0662 15.0516  -2
  12   5   0 63.0662 15.0516   1
 -12  -5  -1 139.405 18.2020   1
 -12  -5   2 186.429 15.8351  -2
  12   5   1 186.429 15.8351   1
 -12  -5   3 21.2820 11.6805  -2
  12   5   2 21.2820 11.6805   1
 -12  -5   4 177.643 20.5332  -2
  12   5   3 177.643 20.5332   1
  12  -5  -5 31.2367 22.2259  -2
 -12   5  -4 31.2367 22.2259   1
 -12  -5  -5 31.6868 21.0738   1
  12  -5  -6 87.3192 23.5596  -2
 -12   5  -5 87.3192 23.5596   1
 -12  -5  -6 27.4195 19.3366   1
  12   5  -7 80.3330 43.3764  -2
 -12  -5  -6 80.3330 43.3764   1
 -12  -5  -7 30.4227 19.9476   1
  12   5  -8 72.8872 41.4387  -2
 -12  -5  -7 72.8872 41.4387   1
  12   5  -9 76.4160 21.4833  -2
 -12  -5  -8 76.4160 21.4833   1
 -12   6  -6-13.6334 25.0321  -2
  12  -6  -7-13.6334 25.0321   1
 -12   6  -5-31.3078 23.4000  -2
  12  -6  -6-31.3078 23.4000   1
 -12  -6   5 7.38115 24.5438   1
 -12  -6  -4 96.8677 15.8496  -2
  12   6  -5 96.8677 15.8496   1
 -12  -6   4 2.29081 20.9444   1
 -12  -6  -3-8.09764 13.5073  -2
  12   6  -4-8.09764 13.5073   1
 -12  -6   3 186.415 29.7688   1
  12  -6   2 198.409 14.9863  -2
 -12   6   3 198.409 14.9863   1
 -12  -6   2 7.42472 18.7900   1
  12  -6   1 44.2806 12.1628  -2
 -12   6   2 44.2806 12.1628   1
 -12  -6   1 132.551 23.1356   1
 -12  -6   0 127.493 15.4940  -2
  12   6  -1 127.493 15.4940   1
 -12  -6   0 105.448 20.4274   1
 -12  -6   1 152.605 15.6165  -2
  12   6   0 152.605 15.6165   1
 -12  -6   2 69.8092 14.1079  -2
  12   6   1 69.8092 14.1079   1
 -12  -6   3 120.518 16.6884  -2
  12   6   2 120.518 16.6884   1
 -12  -6   4 6.76809 15.5770  -2
  12   6   3 6.76809 15.5770   1
  12   6  -5 132.685 41.2888  -2
 -12  -6  -4 132.685 41.2888   1
  12   6  -6 28.0786 36.1637  -2
 -12  -6  -5 28.0786 36.1637   1
  12   6   6-7.40797 14.8830   1
  12   6  -7 44.4896 39.0309  -2
 -12  -6  -6 44.4896 39.0309   1
 -12  -6  -7 77.2987 23.4921   1
  12   6  -8 144.687 47.9586  -2
 -12  -6  -7 144.687 47.9586   1
 -12  -7  -4 38.5394 25.0070  -2
  12   7  -5 38.5394 25.0070   1
 -12  -7   4 9.06941 21.6887   1
 -12  -7  -3 86.9155 15.9042  -2
  12   7  -4 86.9155 15.9042   1
 -12  -7   3 14.6814 20.5995   1
 -12   7  -2-5.12232 13.1592  -2
  12  -7  -3-5.12232 13.1592   1
 -12  -7   2 26.5647 21.1540   1
 -12   7  -1 86.6610 16.0798  -2
  12  -7  -2 86.6610 16.0798   1
 -12  -7   1 40.8011 19.3216   1
  12   7   0 43.6434 11.9079  -2
 -12  -7   1 43.6434 11.9079   1
 -12  -7   1 9.60738 12.1828  -2
  12   7   0 9.60738 12.1828   1
 -12  -7   2 110.873 18.0968  -2
  12   7   1 110.873 18.0968   1
 -12  -7   3-2.25277 14.5116  -2
  12   7   2-2.25277 14.5116   1
 -12  -7   4 189.225 20.4305  -2
  12   7   3 189.225 20.4305   1
  12   7   4-57.5889 31.1030   1
 -12  -7   5-3.80104 20.9241  -2
  12   7   4-3.80104 20.9241   1
  12   7   5-21.0322 32.4072   1
  12   7  -6 145.193 44.1397  -2
 -12  -7  -5 145.193 44.1397   1
  12   7   6-3.01966 28.8637   1
  12   7  -7 45.4242 39.7542  -2
 -12  -7  -6 45.4242 39.7542   1
 -12  -8  -3 4.94786 22.5969  -2
  12   8  -4 4.94786 22.5969   1
 -12  -8   3 132.822 27.9111   1
 -12  -8  -2 170.956 21.3810  -2
  12   8  -3 170.956 21.3810   1
 -12  -8   2-13.2935 18.8350   1
  12   8   1 25.2793 14.6058  -2
 -12  -8   2 25.2793 14.6058   1
  12   8   0 58.7855 16.6250  -2
 -12  -8   1 58.7855 16.6250   1
 -12   8   1 34.3627 15.5475  -2
  12  -8   0 34.3627 15.5475   1
 -12  -8   2 69.2815 17.0877  -2
  12   8   1 69.2815 17.0877   1
 -12  -8   3 60.2686 21.3820  -2
  12   8   2 60.2686 21.3820   1
 -12  -8   4-0.24657 19.3393  -2
  12   8   3-0.24657 19.3393   1
  12   8  -5-20.9107 35.7847  -2
 -12  -8  -4-20.9107 35.7847   1
  12   9   1 36.6209 18.8008  -2
 -12  -9   2 36.6209 18.8008   1
  12   9   0 21.1281 18.0630  -2
 -12  -9   1 21.1281 18.0630   1
  12   9  -1 23.9833 19.2372  -2
 -12  -9   0 23.9833 19.2372   1
  12   9  -2 102.900 22.8738  -2
 -12  -9  -1 102.900 22.8738   1
 -13   0   4 279.862 30.7472   1
 -13   0   2 394.466 32.9310   1
 -13   0   0 78.7910 15.7800   1
 -13   0  -2 13.0170 12.1440   1
 -13  -1   5 2.26201 20.5588   1
 -13   1   4-6.40819 13.0693   1
 -13   1   3 18.5848 13.2887   1
 -13   1   2-1.73600 11.8772   1
 -13   1   1-6.76618 10.9100   1
 -13   1   0 114.311 12.1081   1
 -13   1  -1-6.64600 7.96538   1
 -13  -1  -2 156.321 12.6933   1
 -13  -1  -3 9.01915 11.0123   1
 -13  -2   5 43.9283 22.3604   1
 -13   2   4 139.220 18.7347   1
 -13   2   3 0.25815 13.2244   1
 -13   2   2 226.349 18.9463   1
 -13   2   1 18.3033 11.9196   1
 -13   2   0 80.6657 13.7232   1
 -13   2  -1 20.1272 10.8199   1
 -13   2  -2 48.2732 16.3022   1
 -13   2  -3 30.6776 15.4751   1
 -13  -3   5 37.1940 23.6450   1
 -13  -3   4 2.14667 19.5065   1
 -13   3   3 39.9904 14.4041   1
 -13   3   2 12.6120 12.8193   1
 -13   3   1 43.7346 13.2969   1
 -13   3   0 155.322 15.4866   1
 -13   3  -1 13.1506 15.7638   1
 -13   3  -2 83.8241 19.3312   1
 -13   3  -3 5.25835 14.0552   1
  13  -4  -6 14.4962 19.5340   1
 -13  -4   4 105.228 25.9654   1
 -13  -4   3 15.6032 20.0245   1
 -13  -4   2 172.339 25.0942   1
 -13   4   1 29.5724 12.8620   1
 -13   4   0 72.9748 20.5880   1
 -13   4  -1 48.8866 19.0303   1
 -13   4  -2 26.1508 17.9197   1
 -13  -5   4-10.7619 19.3135   1
 -13  -5   3 85.8888 22.8616   1
 -13  -5   2-8.79022 17.6131   1
 -13  -5   1 36.7441 18.1847   1
 -13   5  -1 56.3079 20.6709   1
 -13  -6   3-25.7243 18.7102   1
 -13  -6   2 72.0131 21.5805   1
 -13  -7   3 80.9113 24.9480   1
 -14   0   0 103.477 20.7286   1
 -14  -1   1-7.95440 16.0904   1
 -14   1  -1 26.7173 16.6375   1
 -14  -2   1-7.80911 16.7611   1
   1   0  -2 262.529 9.27604   2
  -1   0  -2 216.758 7.21958   2
  -1   1   3 22.9760 4.91094   2
   1   1  -2 613.523 7.99831   2
  -1   1   1 127.636 2.93264   2
  -1  -1   0 2766.26 14.9795   2
  -1  -1  -1 176.352 3.75876   2
  -1   1  -2 832.751 7.56128   2
  -1   2   2 1934.80 11.6203   2
  -1   2   1 158.798 3.38748   2
  -1   2   0 1.73487 1.02129   2
  -1   2  -1 42.3993 1.79196   2
  -1   2  -2 1766.72 11.5351   2
  -1   3   3 470.068 8.03059   2
   1   3  -2 24.6820 1.98426   2
   1   3  -1 19.8018 1.36953   2
  -1  -3   0 2787.33 17.4962   2
  -1  -3  -1 24.8262 2.16894   2
   1  -3   2 143.712 2.82051   2
  -1   3  -3 384.456 17.9866   2
   1   4  -4 328.187 10.4635   2
   1  -4  -3 286.805 14.1720   2
  -1   4   2 476.162 10.6541   2
   1   4  -1 393.269 8.16213   2
   1  -4   0 0.96614 1.26967   2
  -1  -4  -1 286.100 7.02599   2
  -1   4  -2 280.550 12.5206   2
   1   4   3 343.060 7.77886   2
   1  -5  -3 176.403 13.2551   2
   1  -5  -1 16.4692 2.95753   2
   1  -5   1 5.70432 2.79396   2
  -1   5  -2 150.054 10.1380   2
   1  -6  -4 43.8116 8.89130   2
   1  -6  -2 43.9728 9.78071   2
   1  -6   0 6.06997 5.69429   2
   1  -6   1 819.276 30.1153   2
   1  -7  -4 99.1962 12.6168   2
   1  -7  -1 1.13327 8.32732   2
   1  -7   0 381.798 23.0715   2
   1  -7   1 25.6806 11.2740   2
   1  -8  -1 456.709 27.1095   2
   1  -8   0-2.59873 7.04512   2
   1  -8   1 440.304 29.1197   2
  -1   8  -2 8.42523 1.74657   2
   1  -9  -3 142.538 20.6218   2
   1  -9  -2 4.62176 11.1070   2
   1  -9  -1 9.48427 12.7418   2
   1  -9   0 22.6906 14.4033   2
   1  -9   1 8.30285 12.6445   2
  -1  -9  -3 510.161 7.80189   2
  -1 -10   6 6.78576 7.49987   2
  -1 -10   5 5.08565 5.24331   2
  -1 -10   4 9.56010 1.76200   2
   1 -10  -3 79.5046 17.8371   2
   1 -10  -1 82.5438 19.4071   2
   1 -10   0 26.1434 15.7308   2
   1 -10   1 64.8131 19.5283   2
  -1 -10  -4 6.34551 4.37014   2
  -1 -11   5 91.1858 4.73879   2
   1 -11  -4 2.00164 14.4259   2
   1 -11   0 17.0719 17.8474   2
   1 -11   1-4.26917 17.0701   2
   1 -12  -3 48.6105 21.3273   2
   1 -12  -2 16.4406 19.7784   2
   1 -12   0-2.38066 19.4759   2
   1 -12   1 33.4559 21.2286   2
   1 -12   6 9.46415 19.7802   2
   1 -13  -2 5.20366 18.9265   2
   1 -13  -1-7.91843 17.4951   2
   1 -13   0 2.65077 19.8219   2
   1 -14  -2 20.1463 22.4548   2
   2   0  -6 68.5235 5.38359   2
   2   0  -4 431.200 7.22077   2
  -2   0   2 157.317 3.98575   2
  -2   0   0 2782.74 12.1870   2
  -2   0  -2 608.111 8.85019   2
  -2   0  -4 1113.34 21.7561   2
  -2   0  -6 11.9643 2.65498   2
   2   1  -7 10.0921 2.77694   2
   2   1  -6 1933.19 13.3229   2
  -2   1   5 5.38444 1.10362   2
   2   1  -4 682.296 9.23918   2
   2   1  -3 2.02245 1.47375   2
  -2   1   2 1011.57 7.80424   2
  -2  -1   1 45.5881 1.54356   2
  -2  -1   0 16.3452 1.00364   2
   2   1   1 2.62579 0.76391   2
  -2   1  -2 746.781 8.03883   2
  -2  -1  -3 18.8582 1.77621   2
  -2  -1  -4 760.664 8.87552   2
  -2  -1  -5 0.40650 2.13253   2
  -2   1  -6 1706.87 12.6609   2
  -2   1  -7 2.02826 4.21069   2
   2  -1  12-2.42874 3.42906   2
   2   2  -7 80.6005 3.87068   2
  -2   2   6 40.2337 2.98766   2
  -2  -2   5 85.0999 3.61736   2
  -2  -2   4 339.650 5.14382   2
   2   2  -3 381.030 5.55852   2
  -2   2   2 17.8427 1.63151   2
  -2   2   1 0.40767 0.91852   2
  -2   2   0 2039.07 9.07781   2
  -2  -2  -1 2.91247 0.67727   2
   2   2   2 34.5272 1.39524   2
  -2  -2  -3 10.1115 1.60843   2
  -2  -2  -4 875.514 8.48855   2
  -2   2  -5 121.453 5.49072   2
  -2   2  -6 52.4150 6.33668   2
   2  -2  11 6.69209 3.92156   2
  -2  -3  16 112.378 15.3712   2
  -2   3  14-2.15975 5.94439   2
   2   3  -8 224.553 5.79749   2
  -2   3   7 2.51275 4.27249   2
  -2   3   6 2270.72 21.3886   2
  -2   3   5 14.4323 2.51335   2
  -2   3   4 597.369 7.50017   2
   2  -3  -3 28.4443 1.77736   2
  -2   3   2 536.068 5.02950   2
  -2   3   1 87.7677 2.08490   2
  -2   3   0 35.1740 1.90737   2
  -2  -3  -1 335.168 3.43540   2
   2   3   2 340.175 3.85863   2
   2  -3   3 260.617 4.28379   2
  -2  -3  -4 534.255 6.60293   2
  -2   3  -5 6.09390 2.45644   2
  -2   4   7 262.229 13.7157   2
  -2   4   4 543.184 5.72056   2
  -2   4   3 550.545 5.02816   2
  -2   4   2 203.721 4.23937   2
  -2   4   1 15.5660 1.48255   2
   2  -4   0 1127.87 7.31753   2
  -2  -4  -1 17.6880 1.33526   2
  -2  -4  -2 81.9482 2.01259   2
   2   4   3 296.269 4.43310   2
  -2   4  -4 616.781 7.44821   2
  -2   4  -5 90.5785 4.44821   2
  -2  -4  -6 14.8571 2.34746   2
  -2  -4  -7 324.575 10.7512   2
  -2  -5  12 4.91332 7.65949   2
   2   5  -8 30.2708 22.0335   2
   2   5  -7-5.03401 15.5139   2
   2   5  -6 606.012 39.1668   2
   2   5  -5 37.9817 4.12333   2
   2  -5  -4 135.982 5.17575   2
  -2   5   3 100.476 3.29585   2
  -2   5   2 491.893 5.54290   2
  -2   5   1 153.684 3.21563   2
  -2  -5   0 87.3506 2.32422   2
  -2  -5  -1 784.728 5.93686   2
  -2  -5  -2 185.725 3.76451   2
   2   5   3 639.597 5.78996   2
  -2   5  -4 215.351 5.65132   2
  -2   5  -5 7.87893 2.19542   2
  -2   5  -6 735.027 12.9623   2
  -2  -5  -7 5.59832 3.19445   2
   2  -6 -18-9.53073 14.7608   2
   2   6 -10 72.5643 6.02670   2
   2   6  -7 362.273 36.2920   2
   2   6  -6 5.03897 4.56561   2
  -2   6   5 379.378 9.68054   2
   2   6  -4 165.509 6.87712   2
  -2   6   3 552.235 9.48158   2
  -2   6   2 27.9402 2.22601   2
  -2   6   1 0.34217 1.73971   2
   2  -6   0 852.405 7.33739   2
  -2  -6  -1 8.69425 2.51958   2
   2  -6   2 13.3858 2.83518   2
   2   6   3 420.086 6.39956   2
  -2   6  -4 222.064 6.54419   2
  -2   6  -5 199.954 5.51023   2
  -2  -6  -6 0.65471 3.26428   2
  -2  -6  -7 382.565 11.2107   2
   2   7 -11 71.7858 5.83937   2
   2   7 -10 92.3617 7.75689   2
  -2   7   6 276.673 9.92623   2
   2  -7  -5 0.64978 3.73068   2
   2  -7  -4 10.6892 3.73177   2
  -2  -7   3 331.891 9.55201   2
  -2   7   2 105.675 3.97887   2
  -2   7   1 450.249 6.95818   2
   2  -7   0 8.65159 1.85496   2
  -2  -7  -1 337.505 7.01002   2
   2   7   2 89.8015 6.04672   2
   2  -7   3 355.962 6.76557   2
  -2   7  -4 9.77125 1.68258   2
  -2   7  -5 4.17237 10.1206   2
  -2  -7  -6 200.981 13.2218   2
  -2  -7  -7 7.23677 6.58097   2
   2   8 -10 9.79602 6.10155   2
   2   8  -7 414.531 15.5239   2
   2   8  -6 9.73619 4.58162   2
  -2   8   5 124.451 7.16796   2
   2   8  -4 32.6228 5.69836   2
   2  -8  -3 78.2989 16.7164   2
   2   8  -2 5.09644 4.21607   2
   2   8  -1 24.7095 2.79416   2
   2  -8   0 176.923 5.50788   2
  -2  -8  -1 24.0009 3.65538   2
  -2   8  -2 31.0929 3.66014   2
   2   8   3 223.994 6.02283   2
  -2   8  -4 114.994 4.35850   2
  -2  -8  -6 27.7056 9.22459   2
  -2  -8  -7 622.679 22.4111   2
  -2   8  -9 332.138 19.0749   2
   2   8  14-4.61979 23.0684   2
   2   9  -9 168.130 13.0187   2
   2   9  -7-1.63263 6.97091   2
   2   9  -6 9.01715 3.90847   2
   2  -9  -5 15.3839 3.55244   2
   2  -9  -4-4.69791 10.2650   2
   2   9  -3 124.717 10.3366   2
  -2   9   2-4.08252 4.28824   2
  -2  -9   1 416.557 11.5107   2
   2   9   0 9.41067 8.47810   2
  -2   9  -1 328.297 5.10612   2
  -2   9  -2 4.97022 1.97137   2
  -2   9  -3 247.947 7.12710   2
  -2   9  -4 6.57317 2.53399   2
   2   9   5-0.28945 4.17952   2
   2   9   6 71.7508 9.16562   2
  -2   9  -7 2.63923 8.08555   2
   2 -10 -17 7.58252 22.5236   2
   2  10  -6 4.53743 7.64430   2
   2  10  -5 167.765 9.12340   2
  -2  10   4 11.8516 4.09563   2
  -2  10   3 340.277 6.70411   2
   2  10  -2 23.7674 9.32650   2
  -2 -10   1 10.7100 5.60991   2
  -2  10   0 6.65219 5.51696   2
  -2  10  -1 18.0604 4.87940   2
  -2  10  -2 10.3102 4.88986   2
  -2 -10  -3 203.977 4.27422   2
  -2  10  -4 2.15477 2.28428   2
   2  10   5 87.1411 8.58596   2
   2  10   6 4.98727 6.20349   2
   2  10   7 348.863 10.8249   2
  -2 -10  -8 11.5123 7.60391   2
   2 -11  -8 8.08837 11.1679   2
  -2 -11   4 10.9778 4.57537   2
  -2  11   3 98.1269 7.52932   2
  -2  11   2 0.67034 3.85393   2
  -2  11   1 110.463 6.95723   2
  -2  11   0 0.73547 5.75787   2
  -2  11  -1 212.840 10.4410   2
  -2  11  -2 5.13671 5.21518   2
  -2  11  -3 217.782 7.71960   2
   2  11   4 7.92240 5.14519   2
  -2 -11  -5 4.57612 4.38987   2
  -2 -11  -6 5.12349 9.71816   2
  -2 -11  -7-4.46739 10.3980   2
  -2 -11  -8-2.69882 12.4902   2
  -2  12   5 77.0518 14.0703   2
  -2  12   3 182.806 16.4870   2
  -2  12   2 27.6406 7.70932   2
  -2  12   1 4.06563 6.57733   2
  -2  12   0 13.7975 6.47821   2
  -2  12  -1 1.96346 5.70192   2
  -2  12  -2 8.60360 4.51584   2
   2  12   3 126.910 9.11195   2
   2  12   4 9.19767 5.77669   2
   2  12   6 11.7614 13.6987   2
  -2  13   4 7.76806 11.4099   2
  -2  13   3 71.0252 13.2887   2
  -2  13   2 6.43732 9.58733   2
  -2  13   1 107.276 10.0876   2
  -2  13   0 5.95797 6.87435   2
   2  13   1 83.8005 15.7097   2
   2  13   2-2.43021 12.2553   2
   2  13   3 119.353 18.5290   2
   2  13   4 28.6636 14.6183   2
   2  13   5 16.0289 14.7693   2
  -2 -13 -11-1.92612 18.8249   2
  -2  14   5 18.2572 12.3911   2
  -2  14   4 11.2965 12.3533   2
  -2  14   3 74.6839 14.0455   2
  -2  14   2 21.6258 11.3013   2
  -2  14   1-5.05388 9.01523   2
   2  14   1 5.33897 8.06934   2
   2  14   2 25.6483 15.5739   2
   2  14   3 60.1585 17.8486   2
   2  14   4 5.78877 15.2900   2
   2  14   5 61.4184 19.0225   2
  -2  15   7 1.44102 13.8648   2
  -2  15   6 29.5158 14.3552   2
  -2  15   5-5.00578 11.7137   2
  -2  15   4 27.7850 13.6679   2
   2  15   3 20.1310 16.6708   2
   2  15   4 18.4236 15.9945   2
   2  15   5-1.62406 16.9966   2
   2  15   6 5.13737 16.3893   2
  -2  16   8 15.6578 16.5202   2
  -2  16   6-6.88655 14.4695   2
   2  16   5 5.06305 19.0413   2
   2  16   6-1.79077 18.0352   2
   3   0 -18 55.3159 22.0439   2
  -3   0  16 142.110 16.4601   2
  -3   0  14-6.35632 12.1611   2
  -3   0  12 37.6089 26.7463   2
  -3   0  10 368.103 19.9269   2
  -3   0   8 97.6286 6.91424   2
  -3   0   6 1183.76 13.4259   2
  -3   0   4 232.259 5.48342   2
   3   0  -2 578.025 8.09211   2
  -3   0   0 50.8776 1.69642   2
  -3   0  -2 158.896 4.55021   2
  -3   0  -4 75.9264 4.71554   2
  -3   0  -6 1635.14 31.6895   2
  -3   0  -8 225.823 6.72138   2
  -3   1  20-15.3525 16.2135   2
  -3   1  18-0.16549 12.3422   2
   3   1 -17-6.13933 15.0732   2
   3   1 -16 51.5545 17.9450   2
  -3   1  15-2.00245 5.59282   2
   3   1 -14 24.0409 10.0476   2
  -3  -1  13 3.01504 8.27102   2
  -3  -1  12 629.106 20.7052   2
  -3  -1  11-8.55600 7.06567   2
  -3  -1  10 463.204 16.1879   2
  -3   1   9 6.16735 2.79927   2
  -3   1   8 181.792 5.17580   2
  -3   1   7 17.7145 1.62205   2
  -3  -1   6 68.3712 2.84099   2
   3   1  -5 31.6833 2.35334   2
  -3   1   4 477.682 6.52638   2
  -3   1   3 47.9588 1.86332   2
  -3  -1   2 188.602 3.65950   2
  -3  -1   1 0.23269 0.98217   2
  -3  -1   0 2623.26 9.47757   2
  -3   1  -1 1.29772 0.94288   2
   3   1   2 459.735 5.99888   2
  -3  -1  -3 3.63973 1.46057   2
  -3  -1  -4 1252.58 11.7041   2
  -3  -1  -5 7.21376 2.72016   2
  -3  -1  -6 4.25326 2.42311   2
  -3   1  -7 17.1106 2.28867   2
  -3   1  -8 32.4271 2.59347   2
  -3   1  -9 15.7675 3.69570   2
   3   1  10 164.915 8.89108   2
   3   1  11 24.0855 6.66714   2
   3   1  12 415.802 14.0406   2
   3   1  13-0.15701 12.1736   2
   3  -1  14 67.3621 32.6607   2
   3  -1  15 4.73004 27.5468   2
   3  -1  16 92.1062 41.3569   2
  -3   2  19 5.52699 19.3550   2
   3  -2 -18 56.5256 17.5372   2
   3  -2 -17-10.5374 12.0608   2
   3  -2 -16 89.6632 10.4454   2
   3  -2 -15 2.44768 8.56207   2
  -3  -2  14 13.9842 6.97423   2
  -3   2  13 28.8040 9.47107   2
  -3  -2  12 28.8867 8.96586   2
  -3  -2  11-0.07794 6.52799   2
  -3  -2  10 405.991 14.3821   2
  -3   2   9 7.97671 2.92277   2
  -3   2   8 81.0014 2.97951   2
  -3   2   7 10.6109 1.85441   2
  -3  -2   6 1404.18 10.1112   2
   3   2  -5 3.54056 1.93445   2
  -3   2   4 498.951 5.41258   2
  -3   2   3 151.598 2.89758   2
  -3  -2   2 516.185 5.33067   2
  -3  -2   1 93.1280 2.58210   2
  -3   2   0 25.1397 1.48501   2
  -3  -2  -1 62.3642 2.14333   2
   3   2   2 199.807 3.84356   2
  -3  -2  -3 55.8756 1.76629   2
  -3  -2  -4 283.455 4.50074   2
  -3  -2  -5 1.86918 1.86023   2
  -3  -2  -6 1371.73 12.2911   2
  -3   2  -7 1.15179 2.49456   2
  -3   2  -8 205.275 6.29546   2
  -3   2  -9 59.3645 4.60111   2
   3   2  10 460.443 9.93761   2
   3   2  11 6.83894 5.82787   2
   3   2  12 4.84378 5.45712   2
   3   2  13 24.4688 16.0525   2
   3   2  14 8.58720 16.2758   2
   3  -2  15 21.3628 24.1385   2
   3   2  16 60.4118 21.8989   2
   3   2  18 38.5410 23.0698   2
   3   2  19 6.20045 21.6093   2
   3  -3 -18 5.04424 12.9753   2
  -3   3  17 2.08464 10.4814   2
   3   3 -16 93.0881 13.0232   2
   3  -3 -15 22.1427 8.86876   2
  -3   3  14 54.5513 10.9246   2
  -3   3  13 5.75200 8.61377   2
  -3  -3  12 233.598 14.5112   2
  -3   3  11 7.88845 5.16326   2
  -3  -3  10 209.605 8.75283   2
  -3  -3   9 44.2352 3.35224   2
  -3   3   8 94.4576 4.01829   2
  -3   3   7 233.745 4.91976   2
  -3  -3   6 61.4952 2.74925   2
   3  -3  -5 110.881 2.97117   2
  -3  -3   4 195.004 3.60248   2
  -3   3   3 133.910 3.21657   2
  -3   3   2 85.4883 2.86098   2
  -3   3   1 134.262 2.84289   2
  -3  -3   0 2238.68 11.7427   2
   3  -3   1 141.391 2.64048   2
   3   3   2 499.417 5.70569   2
  -3  -3  -3 240.801 4.02215   2
  -3  -3  -4 589.218 6.09626   2
  -3  -3  -5 79.4081 3.24942   2
  -3  -3  -6 6.10821 2.49476   2
  -3   3  -7 55.9868 3.58961   2
  -3   3  -8 6.70373 2.81637   2
  -3   3  -9 103.792 5.06950   2
   3   3  10 76.9181 5.24373   2
  -3   3 -11 29.1413 4.63197   2
   3   3  13 8.32239 12.1494   2
   3   3  14 114.781 22.7256   2
   3   3  15 11.6228 19.0536   2
   3   3  17 2.08962 21.2672   2
   3   3  19 2.20205 23.1287   2
   3  -4 -18 39.5341 17.6612   2
  -3   4  17 8.01557 12.0637   2
   3   4 -16 78.0474 13.2984   2
  -3   4  15 18.5762 8.81256   2
  -3   4  14 8.17804 7.22572   2
  -3  -4  13 86.3684 17.5545   2
  -3   4  12 37.6779 10.8727   2
  -3  -4  11 44.7852 6.31352   2
  -3  -4  10 180.710 5.22248   2
  -3   4   9 114.059 7.28202   2
  -3   4   8 85.8642 4.62526   2
  -3  -4   7 3.03929 2.57837   2
  -3  -4   6 899.292 8.33229   2
   3   4  -5 35.3915 2.37829   2
  -3  -4   4 282.382 4.04140   2
  -3  -4   3 164.100 3.35160   2
  -3   4   2 452.920 5.96013   2
  -3   4   1 326.033 4.74708   2
  -3  -4   0 5.65413 1.61412   2
   3  -4   1 265.815 3.46612   2
  -3  -4  -2 82.5365 1.78525   2
   3   4   3 362.010 4.12089   2
   3   4   4 87.9959 2.41923   2
  -3  -4  -5 64.8177 2.89674   2
  -3   4  -6 629.677 7.62792   2
  -3   4  -7 23.1025 2.58636   2
  -3   4  -8 154.339 4.46500   2
  -3   4  -9 137.197 4.64354   2
   3   4  10 393.809 8.80915   2
   3   4  11 50.7367 13.7636   2
   3   4  12-1.80247 15.4954   2
  -3  -4 -13 23.3963 11.2985   2
   3   4  14-13.9056 15.9989   2
   3   4  15 20.6485 15.8693   2
   3   4  17 6.65728 22.5847   2
  -3   5  18-4.02389 11.4547   2
   3  -5 -17 10.7474 15.3485   2
  -3   5  16 43.7923 9.39585   2
  -3   5  15 62.8489 9.83567   2
  -3   5  14 13.9645 8.48867   2
  -3   5  13 23.8677 11.4452   2
  -3  -5  12 299.845 18.9048   2
  -3  -5  11 1.98898 14.1838   2
  -3  -5  10 165.488 10.9873   2
  -3   5   9 106.868 6.75627   2
  -3  -5   8 58.8082 4.97520   2
  -3   5   7 421.630 7.56927   2
  -3   5   6 1.99198 2.24797   2
  -3  -5   5 211.022 3.40605   2
  -3  -5   4 306.210 4.12722   2
  -3  -5   3 609.361 7.09522   2
  -3  -5   2 79.0527 2.96530   2
  -3   5   1 0.68500 1.72161   2
  -3  -5   0 949.669 7.80875   2
  -3  -5  -1-0.27308 1.24479   2
  -3  -5  -2 120.046 2.91829   2
  -3  -5  -3 231.199 3.73721   2
   3   5   4 468.080 4.99310   2
   3   5   5 145.402 3.35296   2
  -3   5  -6 0.61396 1.89291   2
  -3   5  -7 198.654 4.85095   2
  -3   5  -8 2.86613 2.31406   2
   3  -5   9 46.3680 4.13876   2
   3   5  10 23.4724 4.63067   2
  -3  -5 -11 11.1102 4.61776   2
  -3  -5 -12 45.0926 12.5041   2
  -3  -5 -13 1.52026 9.57094   2
   3   5  14 23.3782 21.1232   2
   3   5  15 39.8348 22.7536   2
   3   5  17 23.3098 18.4159   2
   3   5  18-4.82647 24.0707   2
  -3   6  17 1.15281 11.3782   2
  -3   6  16 17.8811 9.55609   2
  -3   6  15 17.1219 8.89760   2
  -3   6  14-4.02985 10.1785   2
  -3   6  13 169.524 17.2291   2
  -3  -6  12-8.21842 15.6322   2
  -3   6  11 53.5090 3.95440   2
  -3   6  10 79.1426 6.84445   2
  -3   6   9 224.549 8.13044   2
   3  -6  -8 0.26374 4.15196   2
  -3  -6   7 1.82827 3.57227   2
  -3  -6   6 322.851 5.73426   2
  -3  -6   5 6.68859 2.07288   2
  -3  -6   4 111.748 3.56079   2
  -3  -6   3 212.938 4.17765   2
  -3  -6   2 174.362 3.82121   2
  -3   6   1 354.635 4.89713   2
  -3  -6   0 1.57388 1.57655   2
  -3  -6  -1 377.995 4.43002   2
  -3  -6  -2 75.4798 2.56055   2
  -3  -6  -3 476.008 6.39187   2
  -3  -6  -4 49.7641 2.34228   2
   3   6   5 51.8416 2.59832   2
  -3  -6  -6 412.128 5.02082   2
  -3   6  -7 22.2734 2.61328   2
  -3   6  -8 19.5507 2.57306   2
  -3  -6  -9 100.426 10.4865   2
  -3  -6 -10 53.5928 9.76309   2
  -3  -6 -11 32.6431 11.6937   2
  -3  -6 -12-4.41187 9.68839   2
  -3  -6 -13 98.2427 14.9150   2
   3   6  14 7.52864 15.8986   2
   3   6  15 60.6272 18.6146   2
   3   6  16 33.3845 14.5713   2
   3   6  17 26.9519 15.0778   2
   3  -7 -17 3.74849 13.9597   2
  -3   7  16 0.12196 9.02560   2
  -3   7  15 55.5511 12.2330   2
  -3   7  14 11.1875 10.0640   2
   3  -7 -13 1.53168 11.6172   2
   3   7 -12 77.7693 13.4627   2
  -3   7  11-5.85431 7.67117   2
  -3  -7  10 38.7420 8.27548   2
   3  -7  -9 36.0931 5.59157   2
  -3   7   8 26.6349 4.50909   2
  -3   7   7 247.978 7.67894   2
  -3  -7   6 23.0718 2.72795   2
  -3  -7   5 282.184 4.90385   2
  -3  -7   4 127.890 4.00227   2
  -3  -7   3 658.529 6.72693   2
  -3   7   2 4.55556 1.93072   2
  -3   7   1 65.1986 2.86083   2
  -3  -7   0 299.601 3.97529   2
  -3  -7  -1 62.7826 2.76894   2
  -3  -7  -2 33.6611 3.06226   2
  -3  -7  -3 273.710 4.90122   2
  -3  -7  -4 236.559 5.04136   2
  -3  -7  -5 144.372 3.60915   2
   3   7   6 16.9613 2.13080   2
  -3  -7  -7 192.274 5.57135   2
  -3  -7  -8 2.12893 3.91515   2
  -3  -7  -9 194.309 9.82306   2
  -3  -7 -10 18.6853 7.64232   2
  -3  -7 -11 35.8903 9.31263   2
  -3  -7 -12 41.1659 10.3551   2
  -3  -7 -13 0.41756 8.39349   2
   3   7  14 19.0965 12.9766   2
   3   7  15 35.6085 14.0079   2
   3   7  16 37.2062 14.9734   2
   3   7  17-1.82096 17.9436   2
   3  -8 -17 2.00433 14.4674   2
  -3   8  16 7.72469 9.59272   2
  -3   8  15 17.5624 11.5437   2
   3  -8 -14-4.08584 9.56401   2
   3   8 -13 173.722 18.0699   2
  -3   8  12 1.12156 7.71155   2
  -3   8  11 69.7627 9.34203   2
  -3   8  10 55.1538 7.59262   2
   3  -8  -9 196.392 9.19987   2
  -3   8   8 18.5622 5.64313   2
  -3   8   7 5.68040 3.40760   2
  -3  -8   6 111.335 4.67192   2
  -3   8   5 1.08137 3.20645   2
  -3  -8   4 5.28194 2.46775   2
  -3  -8   3 305.596 5.27211   2
  -3  -8   2 12.0894 2.17242   2
  -3   8   1 285.833 4.37644   2
  -3  -8   0 1.37694 2.04109   2
  -3  -8  -1 434.581 5.86710   2
  -3  -8  -2 48.2849 3.65502   2
  -3  -8  -3 327.164 5.64640   2
  -3  -8  -4 7.88970 1.90767   2
  -3  -8  -5 7.02121 2.70721   2
  -3  -8  -6 51.9220 3.38280   2
   3  -8   7 8.70432 4.01457   2
  -3  -8  -8 6.53265 4.66894   2
  -3  -8  -9 127.196 9.08440   2
  -3  -8 -10 36.3395 8.19736   2
  -3  -8 -11 41.9430 8.76140   2
  -3  -8 -12 0.77844 9.14067   2
  -3  -8 -13 128.839 12.4944   2
   3   8  14 11.7739 13.3133   2
   3   8  15 52.0368 14.6597   2
   3   8  16-10.9714 14.1834   2
   3   8  17-0.79053 18.1075   2
   3  -9 -17 30.7565 22.7078   2
   3  -9 -16 11.3355 10.9997   2
   3  -9 -15 43.3684 15.8076   2
  -3   9  14 4.40431 8.77531   2
  -3   9  13-4.29448 8.08287   2
  -3   9  12 14.0144 9.35521   2
  -3   9  11 3.47269 6.88681   2
  -3  -9  10 2.06661 5.92399   2
  -3   9   9 82.3154 7.54448   2
  -3  -9   8 2.16717 2.54319   2
  -3  -9   7 295.539 5.95790   2
  -3   9   6 5.70923 2.96032   2
  -3  -9   5 49.1382 8.40416   2
  -3   9   4 8.20796 3.42331   2
  -3  -9   3 381.077 6.77431   2
  -3   9   2 0.46430 1.97083   2
  -3   9   1 5.45099 1.92659   2
  -3   9   0 67.7004 3.60901   2
  -3  -9  -1 29.8638 2.64520   2
  -3  -9  -2 1.88705 2.97727   2
  -3  -9  -3 145.585 4.30234   2
  -3   9  -4 32.6787 2.65596   2
  -3  -9  -5 110.728 4.56846   2
  -3  -9  -6 5.89429 4.10764   2
  -3  -9  -7 352.685 8.62819   2
   3  -9   8 14.0446 5.09020   2
  -3  -9  -9 118.535 8.81732   2
  -3  -9 -10-5.11421 7.19859   2
  -3  -9 -11 24.0394 8.53036   2
  -3  -9 -12 3.24069 8.74539   2
   3   9  13 7.70106 12.0760   2
   3   9  14 2.83760 14.4472   2
   3   9  15 8.38428 10.9810   2
   3   9  16 0.34614 16.8347   2
   3 -10 -16 2.31931 13.6912   2
   3 -10 -15 11.1899 14.2222   2
  -3  10  14-1.08161 10.6503   2
   3  10 -13 76.3079 10.5057   2
  -3  10  12-7.73754 7.26502   2
  -3  10  11 45.5068 8.37783   2
  -3 -10  10 16.5735 6.56817   2
  -3  10   9 179.287 9.16598   2
  -3 -10   8 5.39929 5.94517   2
  -3 -10   7-0.00668 2.91759   2
  -3 -10   6 2.56672 3.46976   2
  -3  10   5 2.26525 3.12542   2
  -3  10   4 14.1605 3.50713   2
  -3 -10   3 122.688 3.73463   2
  -3  10   2 0.06904 2.05251   2
  -3 -10   1 173.160 6.35149   2
  -3  10   0 3.27924 3.45405   2
  -3 -10  -1 230.820 5.64524   2
  -3  10  -2 5.04062 2.37153   2
  -3  10  -3 219.750 5.62856   2
  -3  10  -4-0.20649 2.48136   2
  -3 -10  -5 20.8879 6.32580   2
  -3 -10  -6 2.07864 6.46267   2
  -3 -10  -7 24.8978 5.30158   2
  -3 -10  -8 2.79798 6.01496   2
  -3 -10  -9 84.0198 8.50121   2
   3 -10  10 13.8137 7.69860   2
  -3 -10 -11 21.8796 8.29726   2
  -3 -10 -12 8.64920 8.91664   2
  -3 -10 -13 149.756 17.0549   2
   3  10  14-15.5504 17.8139   2
   3 -10  15 71.9424 31.6084   2
   3 -10  16 9.93066 29.1772   2
  -3 -11  15 37.3516 25.3205   2
  -3 -11  14-18.3564 21.7304   2
  -3  11  13 3.05751 11.3632   2
  -3  11  12 6.81520 10.7596   2
  -3  11  11 2.15624 9.68285   2
  -3 -11  10 17.0110 8.62160   2
  -3  11   9 64.4092 12.8693   2
  -3 -11   8 1.34344 9.22355   2
  -3  11   7 141.446 12.2859   2
  -3 -11   6 3.29814 7.00762   2
  -3  11   5 89.2158 8.30995   2
  -3 -11   4-2.27703 2.99639   2
  -3  11   3 208.779 6.96311   2
  -3 -11   2 4.93077 3.27718   2
  -3  11   1 6.60765 4.12012   2
  -3  11   0 7.65788 4.16377   2
  -3  11  -1 7.59755 4.22169   2
  -3 -11  -2 11.0214 4.46606   2
  -3 -11  -3 135.124 3.90557   2
  -3 -11  -4 2.74906 6.38347   2
  -3 -11  -5 51.1092 8.97043   2
  -3 -11  -6 2.04769 6.59308   2
  -3 -11  -7 150.962 11.7647   2
  -3 -11  -8 3.79201 8.40465   2
  -3 -11  -9 78.6471 11.0865   2
  -3 -11 -10 9.38509 8.71488   2
  -3 -11 -11-1.70362 8.57856   2
   3 -11  12 5.21735 9.76476   2
   3 -11  13 7.20820 17.2331   2
  -3 -12  13 76.7507 26.2643   2
  -3  12  12-10.6503 14.6903   2
  -3  12  11 51.1359 15.5365   2
  -3  12  10-0.31567 10.5374   2
  -3 -12   9 96.9540 14.4366   2
  -3 -12   8 16.0137 11.3955   2
  -3 -12   7 9.58190 8.29180   2
  -3 -12   6 5.07559 7.87723   2
  -3 -12   5 1.76342 6.81953   2
  -3 -12   4 28.9941 6.21482   2
  -3  12   3 102.952 7.77208   2
  -3 -12   2 14.7517 4.86652   2
  -3  12   1 113.475 6.94091   2
  -3 -12   0 8.25449 4.63391   2
  -3  12  -1 124.687 6.86686   2
  -3 -12  -2 1.22908 3.77484   2
  -3 -12  -3 136.423 10.1869   2
  -3 -12  -4-3.11381 7.92839   2
  -3 -12  -5 5.34794 7.15899   2
  -3 -12  -6 13.5471 8.61861   2
  -3 -12  -7 18.3638 8.83470   2
  -3 -12  -8 5.06074 11.7078   2
  -3 -12  -9 22.8415 12.7522   2
  -3 -12 -10-7.52518 11.9304   2
  -3 -12 -11 6.14180 13.1823   2
   3  12  12 2.43106 24.2633   2
  -3  13  11 5.54102 14.7338   2
  -3  13  10 9.35260 13.8337   2
  -3 -13   9 20.9141 12.4700   2
  -3 -13   8 6.02832 10.4961   2
  -3  13   7 38.0932 9.64810   2
  -3 -13   6 0.59592 7.73524   2
  -3 -13   5 30.2697 6.90816   2
  -3 -13   4 5.08329 6.15970   2
  -3 -13   3 77.6418 7.29901   2
  -3 -13   2 14.3010 5.80679   2
  -3  13   1-2.16631 5.29858   2
  -3 -13   0 17.0204 5.49125   2
  -3 -13  -1 9.91098 6.75388   2
  -3 -13  -2 20.1473 9.56537   2
  -3 -13  -3 44.3654 9.03111   2
  -3 -13  -4-4.31732 8.71169   2
  -3 -13  -5 10.2078 8.31718   2
  -3 -13  -6-3.29757 8.69319   2
  -3 -13  -7 33.3510 13.3769   2
  -3 -13  -8 19.5932 13.0404   2
  -3 -13  -9 37.8682 14.5651   2
  -3 -13 -10-1.02252 12.7340   2
  -3 -13 -11 4.96617 14.0100   2
  -3  14  10-6.90389 16.3361   2
  -3  14   9 15.7185 12.9615   2
  -3 -14   8 14.1229 12.7304   2
  -3 -14   7-2.34329 12.6132   2
  -3 -14   6 18.5988 8.52599   2
  -3 -14   5 7.52146 7.05190   2
  -3 -14   4 21.6176 7.14708   2
  -3 -14   3 32.5402 6.85669   2
  -3 -14   2 16.2226 6.83243   2
  -3  14   1 49.1011 10.3213   2
  -3 -14   0 4.83980 9.95240   2
  -3 -14  -1 49.4518 9.53544   2
  -3 -14  -2 8.04004 7.18895   2
  -3 -14  -3 32.6030 11.1497   2
  -3 -14  -4 3.44794 9.45448   2
  -3 -14  -5-5.46478 9.60199   2
  -3 -14  -6 5.29209 12.7900   2
  -3 -14  -7-11.1686 12.4646   2
  -3 -14  -8 9.28373 13.4454   2
  -3 -14  -9 7.50496 14.6948   2
  -3 -14 -10 24.5564 16.0552   2
  -3 -14 -11-4.16804 19.2672   2
  -3  15   9-8.14416 16.1631   2
  -3 -15   8 2.05973 13.2939   2
  -3 -15   7 20.7989 14.3349   2
  -3 -15   6 5.90210 11.1478   2
  -3 -15   5 5.72873 8.48278   2
  -3 -15   4 1.62967 8.22730   2
  -3 -15   3 6.62448 10.6974   2
  -3 -15   2 23.4299 11.6261   2
  -3  15   1 1.90893 9.21319   2
  -3 -15   0 37.4159 11.8976   2
  -3 -15  -1 5.73258 11.1094   2
  -3 -15  -2 27.3153 11.7759   2
  -3 -15  -3 4.98208 8.92615   2
  -3 -15  -4-3.20396 10.5494   2
  -3 -15  -5 21.4479 11.8451   2
  -3 -15  -6-24.5802 12.4451   2
  -3 -15  -7 28.0566 14.8883   2
  -3 -15  -8-21.1768 13.9338   2
  -3  16   7-7.29563 13.4896   2
  -3  16   4-1.37924 15.1923   2
  -3 -16   3 2.20283 11.9100   2
  -3 -16   2-0.80025 11.8683   2
  -3 -16   1 17.9444 13.1352   2
  -3 -16   0 5.50779 11.9048   2
  -3 -16  -1 8.92037 11.8438   2
  -3 -16  -2 5.22651 11.6134   2
  -3 -16  -3 2.37899 11.3699   2
  -3 -16  -4 14.9410 14.0964   2
   3  16   6 50.7290 22.7702   2
   3  16   7-20.5680 19.2360   2
  -3  17   1 5.87440 15.7702   2
  -3  17   0 9.13662 16.7021   2
  -3  17  -1-20.3370 15.8318   2
  -4   0  18-0.03500 12.0207   2
  -4   0  16 110.083 15.5636   2
   4   0 -14 61.1659 12.3888   2
   4   0 -12 428.437 19.1882   2
   4   0 -10 325.212 9.61953   2
   4   0  -8 204.732 6.11264   2
  -4   0   6 60.2632 4.11138   2
  -4   0   4 357.284 6.12700   2
  -4   0   2 339.163 6.33570   2
  -4   0   0 2673.21 12.9480   2
   4   0   2 850.124 7.92428   2
  -4   0  -4 1108.42 18.2283   2
  -4   0  -6 1.29924 5.83582   2
   4   0   8 7.53050 3.84666   2
   4   0  10 136.678 7.02821   2
   4   0  12 307.950 17.1243   2
   4   0  14 107.217 14.7363   2
   4   0  16 208.104 18.6805   2
   4   0  18 2.99341 16.8233   2
  -4   1  19-10.6701 17.7285   2
  -4   1  18 107.788 12.5517   2
  -4   1  17-0.30722 9.16626   2
  -4   1  16 107.203 10.1706   2
  -4  -1  15 2.31868 7.29581   2
  -4  -1  14 20.7630 8.39631   2
   4   1 -13 7.50303 7.48656   2
   4   1 -12 64.8401 8.49060   2
   4   1 -11 2.60293 2.52649   2
   4   1 -10 146.931 6.09687   2
  -4  -1   9 18.9825 2.14355   2
   4   1  -8 33.5981 2.74964   2
   4   1  -7 12.8737 2.83895   2
  -4  -1   6 667.041 8.92555   2
   4   1  -5 13.2353 2.58821   2
  -4  -1   4 278.679 4.37411   2
  -4  -1   3 0.96227 1.46917   2
  -4  -1   2 547.350 6.00492   2
  -4  -1   1 0.25909 1.14600   2
  -4  -1   0 83.9719 1.83411   2
   4   1   1 106.210 2.72596   2
   4   1   2 83.9628 2.05567   2
   4   1   3 55.8315 2.25780   2
  -4  -1  -4 77.7587 3.37517   2
  -4  -1  -5 6.62657 2.95500   2
  -4  -1  -6 742.963 10.8554   2
  -4   1  -7-1.54760 2.91041   2
  -4   1  -8 152.417 4.57393   2
   4   1   9 6.98897 2.70653   2
   4   1  10 109.991 12.3833   2
   4   1  11 2.35489 5.59410   2
   4   1  12-2.26031 5.92612   2
   4   1  13 0.55690 8.37171   2
   4   1  14 0.91038 8.74588   2
   4   1  15 6.61539 9.16680   2
   4   1  16 49.4510 11.3779   2
   4   1  17 4.58887 9.76992   2
   4   1  18 20.3378 16.3918   2
   4   1  19 4.16696 17.1607   2
  -4   2  19-20.8491 18.3211   2
  -4   2  18 2.39354 11.9613   2
  -4   2  17 9.69978 8.66382   2
  -4   2  16 84.6576 9.13794   2
  -4  -2  15 5.17505 6.66656   2
   4  -2 -14 46.0903 8.52030   2
  -4   2  13-5.56753 6.76441   2
   4  -2 -12 337.978 12.8073   2
   4  -2 -11 8.44060 4.52540   2
   4  -2 -10 131.545 5.88315   2
   4  -2  -9 2.31367 1.87411   2
   4   2  -8 177.086 4.53840   2
   4   2  -7 22.6706 2.47487   2
   4   2  -6 77.8900 3.50993   2
   4   2  -5 58.1383 3.38809   2
  -4   2   4 471.465 5.84676   2
  -4   2   3 169.573 3.35239   2
  -4  -2   2 248.227 4.15145   2
  -4  -2   1 11.4983 1.50909   2
  -4   2   0 1615.14 8.77966   2
  -4  -2  -1 22.1844 1.57463   2
   4   2   2 553.104 6.36133   2
   4   2   3 5.20637 1.39443   2
   4   2   4 1330.84 9.91590   2
  -4  -2  -5 7.75002 1.82728   2
  -4   2  -6 15.0731 2.89139   2
  -4   2  -7 130.846 5.07347   2
  -4   2  -8 3.05926 3.09800   2
  -4   2  -9 74.0601 3.80094   2
   4   2  10 108.144 6.07363   2
   4   2  11 3.49224 5.30668   2
   4   2  12 390.053 11.0252   2
   4   2  13-4.41728 6.98481   2
   4   2  14 103.582 9.65915   2
   4   2  15-3.39625 7.76572   2
   4   2  16 158.233 11.8099   2
   4   2  17 8.19723 10.1782   2
   4   2  18 25.6111 16.1973   2
   4   2  19 15.2068 23.1160   2
  -4   3  18 77.5722 24.5436   2
  -4   3  17 3.64831 10.1402   2
  -4   3  16 90.2789 9.19627   2
  -4  -3  15-2.65342 6.83552   2
  -4  -3  14 19.3356 6.91361   2
   4  -3 -13 35.7077 7.36277   2
   4  -3 -12 70.9879 7.76878   2
   4  -3 -11 69.1783 4.18336   2
   4  -3 -10 153.495 4.63931   2
  -4   3   9 152.460 3.86316   2
  -4  -3   8 97.7389 3.96961   2
  -4  -3   7-1.75319 2.26664   2
  -4  -3   6 926.886 8.57869   2
   4  -3  -5 1.01842 2.01417   2
  -4   3   4 148.476 3.90735   2
  -4   3   3 130.062 3.64583   2
  -4  -3   2 407.335 5.41114   2
  -4   3   1 180.371 3.52695   2
  -4  -3   0 42.7143 2.06356   2
  -4  -3  -1 226.509 4.14879   2
   4  -3   2 64.5359 2.30055   2
  -4  -3  -3 151.895 3.39226   2
  -4  -3  -4 47.5938 2.23730   2
   4   3   5 1.43015 2.01356   2
  -4   3  -6 690.628 7.47162   2
  -4   3  -7 12.2797 3.02942   2
  -4   3  -8 79.2805 4.21248   2
  -4   3  -9 13.9590 3.39727   2
  -4   3 -10 355.463 7.39221   2
   4   3  11 16.2418 5.17206   2
   4   3  12 2.75003 5.09606   2
   4   3  13 67.7466 8.45129   2
   4   3  14 5.18123 7.24267   2
   4   3  15 11.0821 7.85583   2
   4   3  16 66.1558 11.4057   2
   4   3  17 15.2433 12.7174   2
   4   3  18 18.7758 16.1219   2
  -4   4  18 6.25551 20.9046   2
  -4   4  17 14.9316 10.8698   2
  -4   4  16 50.1743 9.80750   2
  -4  -4  15 50.4943 8.09807   2
  -4  -4  14 50.2683 7.66145   2
  -4   4  13 0.05661 6.20174   2
   4  -4 -12 258.212 10.9538   2
  -4  -4  11 1.70744 2.82123   2
   4  -4 -10 68.1995 3.82758   2
   4   4  -9 25.1895 3.54725   2
  -4   4   8 68.0027 4.16337   2
  -4  -4   7 96.2937 4.01009   2
  -4   4   6 27.3959 2.80168   2
  -4  -4   5 137.528 3.28283   2
  -4   4   4 197.299 4.55201   2
  -4   4   3 282.149 5.73042   2
  -4  -4   2 102.753 3.46358   2
  -4   4   1 7.34769 1.81645   2
  -4  -4   0 1741.16 10.4546   2
  -4  -4  -1 44.5712 1.98005   2
   4  -4   2 208.768 3.26042   2
  -4   4  -3 96.1932 2.84637   2
   4   4   4 523.226 7.15969   2
   4  -4   5 158.196 3.58965   2
  -4   4  -6 12.9272 2.78391   2
  -4   4  -7 180.130 5.17432   2
  -4   4  -8 26.1219 3.48562   2
  -4   4  -9 29.1243 2.69803   2
  -4   4 -10 92.5252 4.30985   2
   4   4  11 4.81374 5.54933   2
   4   4  12 152.485 8.21745   2
   4   4  13-6.43261 8.18414   2
   4   4  14 43.2848 9.83678   2
   4   4  15 7.80159 9.68098   2
   4   4  16 116.154 12.5552   2
   4   4  17-5.74481 12.0828   2
   4   4  18 10.2134 17.3509   2
  -4   5  17-4.93284 10.1778   2
  -4   5  16 30.3970 9.29421   2
  -4   5  15 1.61701 8.13029   2
  -4  -5  14-1.74392 6.33392   2
   4  -5 -13 97.7034 8.17818   2
  -4   5  12 17.8057 6.01994   2
   4  -5 -11 34.2930 3.96834   2
   4  -5 -10 38.2042 4.82678   2
   4  -5  -9 237.409 6.90677   2
  -4  -5   8 15.4764 3.46277   2
  -4  -5   7 36.0001 3.57253   2
  -4  -5   6 571.911 9.93681   2
  -4  -5   5 9.80416 2.79013   2
  -4  -5   4 123.460 5.55684   2
  -4  -5   3 142.852 4.89190   2
  -4   5   2 275.020 4.77063   2
  -4   5   1 294.419 5.27501   2
  -4  -5   0 52.8894 2.49213   2
  -4  -5  -1 502.981 4.75785   2
   4  -5   2 28.2524 1.62332   2
   4  -5   3 455.162 5.83018   2
   4   5   4 29.3498 2.44167   2
   4   5   5 72.4312 2.73187   2
  -4   5  -6 240.432 7.08392   2
  -4   5  -7 46.3724 3.39746   2
  -4   5  -8 51.6735 3.47042   2
  -4   5  -9 24.4435 2.49663   2
   4   5  10 278.660 9.41063   2
   4   5  11 40.1705 8.20271   2
   4   5  12-2.84518 7.60680   2
  -4  -5 -13 135.224 9.62863   2
   4   5  14-10.3347 8.44303   2
   4   5  15 43.3041 10.1238   2
   4   5  16 11.8623 11.7604   2
   4   5  17 20.8239 13.0486   2
   4  -5  18 3.48916 23.0721   2
  -4   6  17 2.37996 11.5631   2
  -4   6  16 21.8577 8.70176   2
  -4   6  15 50.9837 9.33362   2
  -4   6  14 8.66929 7.97849   2
  -4  -6  13-5.42069 5.67101   2
   4  -6 -12 135.084 9.09776   2
  -4  -6  11 6.39604 5.88072   2
  -4  -6  10 51.7798 4.99985   2
   4   6  -9 26.8254 4.54221   2
  -4  -6   8 15.0518 3.81788   2
  -4   6   7 240.957 5.89387   2
  -4   6   6 16.0429 3.02514   2
  -4  -6   5 232.443 5.64001   2
  -4  -6   4 129.640 5.32862   2
  -4  -6   3 379.077 6.80912   2
  -4  -6   2 56.3015 3.35583   2
  -4   6   1 25.9650 2.56613   2
  -4  -6   0 587.712 5.35537   2
  -4  -6  -1 42.9747 2.22751   2
   4  -6   2 97.4197 2.97466   2
   4  -6   3 162.231 4.07122   2
   4  -6   4 197.611 4.90475   2
   4  -6   5 142.052 3.85979   2
   4   6   6-0.89149 2.66326   2
  -4   6  -7 264.784 5.31520   2
  -4   6  -8 8.82259 2.81306   2
   4  -6   9 86.7391 4.79035   2
   4   6  10 22.2940 7.74966   2
  -4  -6 -11 9.94500 7.21854   2
  -4  -6 -12 59.8394 8.01087   2
  -4  -6 -13 5.02148 7.40855   2
   4   6  14 23.2810 9.51978   2
   4   6  15 18.5775 10.0377   2
   4   6  16 43.8962 12.7060   2
   4  -6  17 21.8538 14.4628   2
   4  -6  18 10.0353 23.5734   2
   4  -7 -17-6.47566 13.5272   2
  -4   7  16 0.40494 8.18472   2
  -4   7  15 15.1880 8.45772   2
  -4   7  14-2.81454 7.46234   2
   4  -7 -13 110.616 11.3732   2
   4  -7 -12-0.13500 8.20814   2
  -4   7  11 142.554 8.40526   2
  -4  -7  10 75.9035 6.98272   2
  -4   7   9 237.354 6.90258   2
  -4  -7   8 8.09254 3.66767   2
  -4  -7   7 3.19195 3.35791   2
  -4  -7   6 144.323 4.43744   2
  -4  -7   5 0.80935 2.39143   2
  -4  -7   4 37.3368 3.76248   2
  -4  -7   3 126.622 6.14264   2
  -4  -7   2 44.1518 3.35101   2
  -4   7   1 447.158 6.31378   2
  -4  -7   0-1.13999 1.98066   2
  -4  -7  -1 383.977 6.12743   2
  -4  -7  -2 10.8919 2.42941   2
  -4  -7  -3 301.212 6.08471   2
  -4  -7  -4 21.7312 3.38041   2
  -4  -7  -5 33.1539 3.29285   2
  -4  -7  -6 96.4851 3.76279   2
   4   7   7 33.4440 3.02595   2
   4  -7   8 0.73238 3.37411   2
  -4  -7  -9 92.8327 4.96735   2
  -4  -7 -10 54.5477 7.30101   2
  -4  -7 -11 28.9947 7.26518   2
  -4  -7 -12 4.98031 7.60874   2
  -4  -7 -13 85.3282 9.05640   2
   4   7  14 5.28400 8.85660   2
   4   7  15 78.1139 12.7819   2
   4   7  16-14.6150 11.0632   2
   4  -7  17 9.70296 21.3876   2
   4  -8 -16 12.5490 11.2297   2
   4  -8 -15 28.1814 10.0615   2
   4  -8 -14-1.24510 8.17949   2
  -4   8  13 5.15089 7.64794   2
  -4   8  12 22.4078 7.53303   2
  -4  -8  11 9.79729 4.65428   2
  -4   8  10 20.3959 6.29905   2
  -4  -8   9 60.0263 6.66978   2
  -4   8   8 3.50397 3.74865   2
  -4   8   7 98.3579 7.38358   2
  -4  -8   6-0.64399 2.72170   2
  -4  -8   5 196.661 5.01144   2
  -4  -8   4 22.8456 3.40157   2
  -4  -8   3 449.733 7.64273   2
  -4  -8   2 4.20736 2.56412   2
  -4   8   1 17.0459 2.68573   2
  -4  -8   0 177.898 4.03195   2
  -4  -8  -1 71.9929 3.56843   2
  -4  -8  -2 7.80312 2.76427   2
  -4  -8  -3 100.411 3.21593   2
  -4  -8  -4 54.4993 4.12535   2
  -4  -8  -5 82.4463 4.75366   2
  -4  -8  -6 1.88699 2.82731   2
  -4  -8  -7 206.515 5.87632   2
   4   8   8-0.14083 3.64917   2
  -4  -8  -9 128.797 7.42636   2
   4  -8  10 9.04468 6.48109   2
  -4  -8 -11 18.8770 6.96917   2
  -4  -8 -12 6.20302 7.27121   2
  -4  -8 -13 6.34270 7.99955   2
   4   8  14 6.26804 8.98405   2
   4   8  15 22.7633 12.0147   2
   4  -8  16 9.26815 13.6461   2
   4  -8  17-15.6988 18.2450   2
   4  -9 -16-4.11383 10.3195   2
   4  -9 -15 19.1321 10.4700   2
  -4   9  14-1.64125 7.68418   2
  -4   9  13 109.415 10.2924   2
  -4   9  12 5.87169 7.37768   2
   4  -9 -11 42.9883 7.08412   2
  -4  -9  10 16.3280 6.28324   2
  -4  -9   9 153.593 8.38005   2
  -4   9   8-1.55981 7.01088   2
  -4   9   7-0.97022 3.00355   2
  -4  -9   6 26.6645 3.57019   2
  -4  -9   5 8.08478 3.13693   2
  -4   9   4 1.24452 3.07003   2
  -4  -9   3 141.610 4.43929   2
  -4  -9   2 11.4162 2.79121   2
  -4   9   1 250.758 4.56667   2
  -4  -9   0 1.51080 2.46919   2
  -4  -9  -1 342.932 5.11807   2
  -4  -9  -2 1.52891 3.46288   2
  -4  -9  -3 299.062 5.44466   2
  -4  -9  -4 4.51295 3.02622   2
  -4  -9  -5 19.8589 3.57626   2
  -4  -9  -6 22.3755 3.39870   2
  -4  -9  -7 26.8607 4.64013   2
  -4  -9  -8-1.46089 4.32763   2
  -4  -9  -9 75.3182 6.89248   2
   4   9  10-0.71046 6.12050   2
  -4  -9 -11 43.7653 8.56790   2
   4  -9  12-0.71831 7.23747   2
  -4  -9 -13 83.6862 10.5784   2
   4   9  14-2.09477 14.9408   2
   4  -9  15 16.0152 13.3794   2
   4  -9  16-19.9060 16.9011   2
   4 -10 -16-11.8508 18.4468   2
   4 -10 -15 44.8009 16.3957   2
  -4  10  14-3.72105 10.0084   2
  -4  10  13 1.78477 7.41149   2
  -4  10  12 0.94035 7.18632   2
  -4 -10  11-1.89950 6.75751   2
  -4 -10  10-6.39874 6.53955   2
  -4 -10   9 43.7658 9.58254   2
  -4  10   8-0.31172 7.66840   2
  -4 -10   7 180.276 12.1419   2
  -4  10   6 13.8212 6.83456   2
  -4 -10   5 112.971 6.13062   2
  -4  10   4 24.1462 3.58847   2
  -4 -10   3 330.432 6.45980   2
  -4 -10   2 7.76837 2.32279   2
  -4 -10   1 12.8169 3.38580   2
  -4 -10   0 9.89590 3.45381   2
  -4 -10  -1 11.4333 3.68437   2
  -4 -10  -2 3.80692 3.43970   2
  -4 -10  -3 119.930 4.35044   2
  -4 -10  -4 3.97323 3.69952   2
  -4 -10  -5 54.7471 6.53938   2
  -4 -10  -6 7.38183 5.47884   2
  -4 -10  -7 128.344 8.09728   2
  -4 -10  -8 6.78203 4.82577   2
  -4 -10  -9 88.4576 7.44982   2
  -4 -10 -10 8.70707 6.88941   2
  -4 -10 -11 18.5001 7.28622   2
   4  10  12-2.98786 7.39588   2
   4 -10  13-0.05168 17.0357   2
   4 -10  14-16.7109 28.0947   2
   4 -10  15 8.53970 13.9379   2
  -4 -11  14-2.89232 25.9651   2
   4 -11 -13 76.2472 11.8993   2
  -4  11  12-2.48807 10.9362   2
  -4 -11  11 38.4801 12.7187   2
  -4 -11  10 7.87543 10.6974   2
  -4 -11   9 106.460 11.3998   2
  -4 -11   8 18.5245 8.56366   2
  -4  11   7 4.35648 7.05396   2
  -4  11   6-1.56969 6.23352   2
  -4  11   5 0.06565 6.13958   2
  -4  11   4 11.4348 5.98268   2
  -4 -11   3 111.071 5.31853   2
  -4  11   2 1.74550 2.75224   2
  -4 -11   1 129.705 6.54032   2
  -4  11   0 5.53640 4.23367   2
  -4 -11  -1 139.001 6.56947   2
  -4  11  -2 1.60454 4.19060   2
  -4 -11  -3 153.949 6.71761   2
  -4 -11  -4 10.3373 5.80570   2
  -4 -11  -5 24.9429 6.28047   2
  -4 -11  -6-1.62130 5.97113   2
  -4 -11  -7 16.5234 6.99446   2
  -4 -11  -8 13.5203 12.2542   2
  -4 -11  -9 22.1286 13.0789   2
  -4 -11 -10 2.90078 10.4590   2
  -4 -11 -11 19.1884 11.4733   2
  -4 -11 -12-0.67033 11.7930   2
  -4  12  12 2.33901 14.2678   2
  -4  12  11 1.23570 10.0709   2
  -4 -12  10 15.4758 10.2832   2
  -4 -12   9 30.9277 11.8781   2
  -4 -12   8 7.98716 10.3995   2
  -4  12   7 63.2106 9.27817   2
  -4 -12   6 4.19610 6.73520   2
  -4 -12   5 64.7734 8.10391   2
  -4  12   4 1.60954 5.30475   2
  -4  12   3 125.498 7.37578   2
  -4  12   2 4.49330 4.96311   2
  -4  12   1 8.70658 4.88428   2
  -4  12   0 5.59350 4.63546   2
  -4  12  -1 10.6128 4.64124   2
  -4 -12  -2 27.9193 6.19464   2
  -4 -12  -3 31.4571 6.97223   2
  -4 -12  -4 8.00299 5.79835   2
  -4 -12  -5 31.0854 8.08377   2
  -4 -12  -6 4.67089 8.38258   2
  -4 -12  -7 96.8572 11.4855   2
  -4 -12  -8-7.59892 11.5637   2
  -4 -12  -9 28.1989 13.8380   2
  -4 -12 -10 18.8959 14.1974   2
  -4 -12 -11 4.72052 14.1807   2
  -4 -12 -12 1.74812 16.5380   2
  -4  13  11 5.45538 18.3247   2
  -4 -13  10 1.03150 12.1990   2
  -4 -13   9 73.9337 14.2062   2
  -4 -13   8-10.6381 11.4606   2
  -4 -13   7 6.85147 8.37326   2
  -4 -13   6 23.4902 8.15032   2
  -4 -13   5 1.88013 5.93992   2
  -4 -13   4 31.5307 6.50346   2
  -4  13   3 46.5050 6.45576   2
  -4 -13   2 6.05804 5.52863   2
  -4  13   1 37.9771 5.76326   2
  -4  13   0 1.75705 5.12858   2
  -4 -13  -1 62.6800 7.24960   2
  -4 -13  -2-1.63092 6.02258   2
  -4 -13  -3 82.6648 8.72290   2
  -4 -13  -4-1.84474 6.66969   2
  -4 -13  -5-0.14291 7.59667   2
  -4 -13  -6 12.4738 8.42227   2
  -4 -13  -7-12.6981 11.7895   2
  -4 -13  -8 13.7147 13.4366   2
  -4 -13  -9 8.87978 13.2111   2
  -4 -13 -10-1.04584 13.1029   2
  -4 -13 -11 1.94174 17.1019   2
  -4 -14  10 12.4208 30.8080   2
  -4 -14   9 20.9065 14.4104   2
  -4 -14   8-1.42635 12.7864   2
  -4 -14   7 23.7072 11.1766   2
  -4 -14   6 3.48371 7.00386   2
  -4 -14   5 9.35841 6.65420   2
  -4 -14   4 2.00419 6.63605   2
  -4 -14   3 37.6177 6.79233   2
  -4 -14   2 7.62179 5.93247   2
  -4  14   1 16.6137 8.40063   2
  -4  14   0 31.0953 8.59676   2
  -4 -14  -1 0.65495 7.39326   2
  -4 -14  -2 31.5717 8.30244   2
  -4 -14  -3 24.0266 8.20408   2
  -4 -14  -4 9.69093 8.58047   2
  -4 -14  -5 5.07273 8.29680   2
  -4 -14  -6 7.32130 10.1307   2
  -4 -14  -7 21.7885 10.9948   2
  -4 -14  -8-5.64354 12.5031   2
  -4 -14  -9-8.85657 14.2985   2
  -4 -14 -10 2.12804 19.0989   2
  -4 -15   8 1.61812 10.0580   2
  -4 -15   7 11.2696 9.81321   2
  -4 -15   6 20.2248 8.83366   2
  -4 -15   5 2.51637 7.49259   2
  -4 -15   4 3.55337 10.3027   2
  -4 -15   3-1.38138 11.9122   2
  -4 -15   2 11.1409 9.14478   2
   4  15  -1 14.5812 10.5834   2
   4  15   0 2.99443 10.2431   2
  -4 -15  -1 6.09611 9.02469   2
  -4 -15  -2 10.6553 9.36474   2
  -4 -15  -3 9.61185 8.28611   2
  -4 -15  -4 7.99962 8.24304   2
  -4 -15  -5 11.4603 9.52086   2
  -4 -15  -6 11.7701 14.2597   2
   4  15   7 17.4890 21.9138   2
  -4  16   4-20.2117 16.0373   2
  -4  16   3 4.60379 16.8360   2
  -4 -16   2 19.3179 13.4986   2
  -4 -16   1 4.77771 13.6619   2
  -4 -16   0 16.4330 14.1284   2
  -4 -16  -1-4.37353 13.7174   2
  -4 -16  -2 16.4946 15.2052   2
  -4 -16  -3 21.4444 14.7728   2
  -4 -16  -4 2.27220 20.2651   2
   4  16   6 19.0717 23.4280   2
  -5   0  18 81.9615 21.5094   2
  -5   0  16 59.4020 14.0231   2
   5   0 -14 28.1294 11.6655   2
   5   0 -12 58.5480 11.1726   2
  -5   0  10 28.2536 3.61668   2
   5   0  -8 49.3276 4.57421   2
  -5   0   6 892.577 12.7200   2
  -5   0   4 302.160 7.19393   2
  -5   0   2 297.868 6.21130   2
  -5   0   0 100.412 2.89311   2
  -5   0  -2 6.23352 2.38782   2
  -5   0  -4 208.362 7.38365   2
   5   0   6 1551.33 27.5265   2
   5   0   8 189.053 11.5900   2
   5   0  10 503.966 20.5185   2
   5   0  12 10.9524 10.2867   2
   5   0  14 14.1076 12.2301   2
   5   0  16 36.4359 15.0825   2
   5   0  18 40.4249 34.3966   2
  -5   1  19 16.7857 20.1925   2
  -5   1  18 39.6388 14.0723   2
  -5  -1  17 4.60356 9.68132   2
   5   1 -16 37.8105 10.0820   2
  -5  -1  15-4.42093 8.45900   2
   5   1 -14 60.1741 9.59596   2
   5   1 -13 1.66505 7.43311   2
   5   1 -12 375.551 14.1615   2
   5   1 -11 4.40387 6.81224   2
   5   1 -10 49.3356 6.19029   2
  -5  -1   9 1.60634 2.78246   2
   5   1  -8 132.961 5.40029   2
  -5  -1   7 9.88196 3.21174   2
   5   1  -6 61.0702 4.10914   2
  -5  -1   5 26.3388 2.90971   2
  -5  -1   4 87.7669 3.05179   2
  -5  -1   3 29.2694 2.09801   2
  -5  -1   2 65.5753 2.53293   2
  -5  -1   1 4.52667 1.41517   2
  -5  -1   0 1355.87 10.4049   2
  -5  -1  -1 3.13681 1.44676   2
   5   1   2 232.699 4.13415   2
   5   1   3 8.40468 1.53281   2
   5   1   4 815.932 9.04808   2
  -5   1  -5 11.2481 2.69973   2
   5   1   6 52.9720 4.32513   2
   5   1   7 3.22323 4.69320   2
   5   1   8 0.61195 3.68862   2
   5   1   9 8.94580 3.19063   2
   5   1  10 89.9875 8.03134   2
   5   1  11 8.93139 6.66119   2
   5   1  12 294.665 12.0955   2
   5   1  13-0.75289 8.96824   2
   5   1  14 66.9390 10.8015   2
   5   1  15-8.24287 9.07892   2
   5   1  16 125.393 12.2263   2
   5  -1  17-0.63145 9.45586   2
   5  -1  18-10.9058 11.7229   2
  -5   2  18 87.2728 25.0712   2
  -5   2  17 5.13926 8.89458   2
  -5  -2  16 62.1142 8.78455   2
  -5   2  15 4.78479 7.69088   2
   5   2 -14 12.3795 7.33781   2
   5   2 -13 48.1862 7.77720   2
   5   2 -12 49.3616 7.62682   2
   5   2 -11 11.8669 2.62225   2
  -5   2  10 125.965 3.67334   2
  -5   2   9 20.1491 2.66155   2
   5   2  -8 57.5332 3.90030   2
  -5  -2   7 7.24035 3.08220   2
  -5  -2   6 699.209 11.9736   2
  -5  -2   5 2.51519 2.39604   2
  -5   2   4 341.200 5.54867   2
  -5  -2   3 42.8472 2.42323   2
  -5  -2   2 568.896 6.14646   2
  -5  -2   1 70.1672 2.49580   2
  -5  -2   0 49.6698 1.96094   2
   5   2   1 13.8319 2.00650   2
   5   2   2 130.030 3.49472   2
   5   2   3 51.8181 2.40230   2
   5   2   4 148.192 3.73099   2
   5   2   5 13.0290 2.16242   2
  -5   2  -6 665.157 8.71613   2
   5   2   7 2.22745 2.72879   2
   5   2   8 113.500 5.83454   2
   5   2   9 10.5368 3.91921   2
   5   2  10 307.272 9.87382   2
   5   2  11-1.67609 5.57539   2
   5  -2  12 7.63364 5.93724   2
   5   2  13 11.2628 7.66232   2
   5   2  14 17.1444 8.33987   2
   5   2  15 4.80182 8.53557   2
   5   2  16 26.6241 8.86185   2
   5  -2  17 6.86875 10.4713   2
   5  -2  18 38.7888 16.5370   2
  -5   3  18-6.08336 18.6463   2
  -5   3  17 1.09646 10.1618   2
  -5  -3  16 31.9207 7.90237   2
  -5   3  15 20.5967 7.93135   2
  -5   3  14 24.9313 7.85144   2
   5   3 -13-1.05202 6.66337   2
   5   3 -12 235.967 7.20573   2
   5   3 -11 1.71589 3.10301   2
  -5  -3  10 215.707 5.20753   2
  -5  -3   9 5.66934 2.71699   2
  -5  -3   8 75.8257 4.00543   2
   5   3  -7 37.7511 3.33821   2
   5  -3  -6 50.0642 4.34646   2
  -5  -3   5 35.6787 3.22756   2
  -5   3   4 98.8174 3.67926   2
  -5  -3   3 205.271 4.67921   2
  -5  -3   2 41.5956 2.58777   2
  -5   3   1 38.8352 2.12186   2
  -5  -3   0 912.889 9.03725   2
  -5  -3  -1 18.2991 1.70491   2
   5   3   2 286.554 5.19055   2
   5  -3   3 50.9777 2.16041   2
   5   3   4 684.295 7.09903   2
   5   3   5 94.8977 3.14275   2
  -5   3  -6 14.9598 2.26984   2
  -5   3  -7 118.517 3.70777   2
   5  -3   8-1.48094 2.46573   2
   5   3   9 41.3735 3.53723   2
   5   3  10 87.5310 6.79023   2
   5   3  11 24.1383 6.77165   2
   5  -3  12 207.000 9.74598   2
   5   3  13-3.72971 7.17172   2
   5   3  14 38.2485 8.47967   2
   5   3  15 12.2663 8.42277   2
   5   3  16 62.6349 11.6988   2
   5  -3  17-7.28287 11.1459   2
   5  -3  18 18.2055 15.7830   2
  -5   4  17 6.79262 10.2605   2
  -5   4  16 10.6104 9.13185   2
  -5  -4  15-2.79841 7.19348   2
  -5   4  14 11.6429 7.30411   2
   5   4 -13 37.1379 7.60342   2
   5   4 -12 23.1714 4.32911   2
  -5  -4  11 52.1099 4.41394   2
  -5   4  10 112.898 4.74651   2
  -5  -4   9 254.502 7.33937   2
  -5  -4   8 17.0997 3.70718   2
  -5  -4   7 8.50380 2.76397   2
  -5  -4   6 486.523 11.5383   2
  -5  -4   5 7.45407 2.99964   2
  -5  -4   4 313.909 6.69726   2
  -5  -4   3 59.2315 3.35788   2
  -5   4   2 311.115 4.95895   2
  -5   4   1 102.853 3.12708   2
  -5  -4   0 26.9704 1.91799   2
  -5  -4  -1 216.977 4.15535   2
   5   4   2 24.7511 2.01656   2
   5  -4   3 284.974 4.37893   2
   5  -4   4 47.4870 3.19335   2
   5  -4   5 57.2298 2.71173   2
   5   4   6 413.651 7.42508   2
   5   4   7 38.8865 4.02352   2
  -5   4  -8 105.075 5.35371   2
  -5   4  -9 30.5378 3.77212   2
   5   4  10 310.743 9.38506   2
   5   4  11 27.7499 6.71386   2
   5   4  12 8.57345 6.29398   2
   5   4  13 57.8874 9.81104   2
   5   4  14 7.28060 9.35097   2
   5   4  15 39.6850 10.7806   2
   5   4  16 27.6425 10.8724   2
   5  -4  17-5.88767 15.3655   2
  -5   5  17 27.1313 12.5382   2
  -5   5  16 30.2803 9.57056   2
  -5   5  15 44.9436 9.95056   2
  -5   5  14 14.5185 7.27236   2
   5   5 -13 4.42705 6.58901   2
   5   5 -12 115.402 6.93707   2
  -5  -5  11-0.54468 4.04400   2
  -5  -5  10 82.6016 5.21431   2
  -5   5   9 14.2618 5.77248   2
  -5  -5   8 52.9012 5.75478   2
  -5  -5   7 230.935 8.07088   2
  -5  -5   6 12.6078 3.60698   2
  -5  -5   5 80.6911 4.88482   2
  -5  -5   4 126.044 5.67766   2
  -5  -5   3 198.288 4.95278   2
  -5  -5   2 23.5694 2.55936   2
  -5   5   1 16.9812 2.51179   2
  -5  -5   0 403.116 7.92137   2
  -5  -5  -1 6.51213 1.99837   2
  -5  -5  -2 106.669 3.02614   2
   5  -5   3 224.970 4.76898   2
   5   5   4 235.133 5.27022   2
   5   5   5 51.0951 3.40137   2
  -5   5  -6 0.95006 2.62201   2
  -5   5  -7 139.766 4.92176   2
  -5   5  -8 0.35476 2.95409   2
   5  -5   9 132.080 5.50951   2
   5  -5  10 19.2347 5.35014   2
   5   5  11 14.7990 6.24069   2
   5   5  12 60.3628 9.27278   2
   5   5  13-3.21515 8.69546   2
   5   5  14 21.2271 9.35998   2
   5  -5  15 10.8051 9.87636   2
   5  -5  16 59.1208 11.2147   2
   5  -5  17 6.17534 20.6475   2
  -5  -6  17-5.34930 16.4832   2
  -5   6  16 22.0653 9.31770   2
  -5   6  15 1.36703 8.38756   2
  -5   6  14-1.50678 8.13258   2
   5   6 -13 62.7664 7.87947   2
  -5  -6  12 16.0150 5.55831   2
   5  -6 -11 49.5338 7.11348   2
  -5  -6  10 72.5932 6.37332   2
  -5  -6   9 284.300 7.70706   2
  -5   6   8 41.4333 4.34256   2
  -5  -6   7 57.5482 5.11229   2
  -5  -6   6 287.845 9.79523   2
  -5  -6   5 29.1307 5.09260   2
  -5  -6   4 35.7603 3.88243   2
  -5  -6   3 112.384 4.34036   2
  -5   6   2 178.227 5.46827   2
  -5  -6   1 181.804 4.41838   2
  -5   6   0 21.0791 2.24247   2
  -5  -6  -1 348.610 4.78755   2
  -5  -6  -2 5.85866 1.73122   2
   5  -6   3 422.163 6.96665   2
   5  -6   4 4.53178 2.72626   2
   5  -6   5 28.4697 3.86295   2
   5  -6   6 315.534 8.28960   2
  -5   6  -7 32.8152 3.32042   2
   5  -6   8 63.8749 4.54522   2
   5  -6   9 30.1541 3.98980   2
   5  -6  10 163.077 8.84332   2
   5  -6  11 21.6925 7.84756   2
   5  -6  12 3.79921 7.87867   2
  -5  -6 -13 68.0156 8.76036   2
   5  -6  14-4.64032 8.65346   2
   5  -6  15 59.6069 11.2437   2
   5  -6  16 8.40400 11.7064   2
  -5  -7  17 11.2998 17.8067   2
   5  -7 -16 25.5362 11.3639   2
  -5   7  15 67.4559 10.2341   2
  -5   7  14-8.26143 7.75518   2
   5   7 -13-8.46947 8.20674   2
  -5  -7  12 16.4020 5.81627   2
  -5   7  11 8.03409 5.81050   2
   5  -7 -10 14.9265 6.04412   2
  -5   7   9 46.2479 5.76070   2
  -5  -7   8 36.5736 5.64942   2
  -5  -7   7 120.690 7.05471   2
  -5  -7   6 11.5797 2.83269   2
  -5  -7   5 167.448 7.06744   2
  -5  -7   4 39.9339 7.25124   2
  -5  -7   3 451.447 8.34009   2
  -5  -7   2 11.7261 3.15533   2
  -5  -7   1 21.3430 3.17460   2
  -5  -7   0 215.920 4.03707   2
  -5  -7  -1 36.2487 2.58375   2
  -5   7  -2 11.9019 2.20206   2
   5  -7   3 73.5077 3.75179   2
   5  -7   4 96.1957 4.18065   2
   5  -7   5 80.6062 4.38955   2
   5  -7   6 2.58936 3.23962   2
   5  -7   7 315.619 8.13536   2
   5  -7   8 3.19876 3.66688   2
   5  -7   9 202.965 9.86696   2
   5   7  10-3.52528 7.02113   2
   5   7  11 21.9250 7.83090   2
   5  -7  12 20.2282 8.37058   2
  -5  -7 -13 7.60538 7.79098   2
   5  -7  14 6.35520 9.18184   2
   5  -7  15 27.6702 10.2388   2
   5  -7  16 8.56084 12.8524   2
  -5  -8  17-9.96391 17.8709   2
   5  -8 -16 14.3049 11.2193   2
   5  -8 -15 2.42341 9.36662   2
   5  -8 -14 10.0602 9.34014   2
  -5   8  13 107.870 10.3221   2
  -5  -8  12-2.75803 6.15057   2
  -5   8  11 69.8545 7.67398   2
  -5   8  10 54.4612 7.02143   2
  -5   8   9 259.779 11.7680   2
  -5  -8   8 8.75886 6.28655   2
  -5  -8   7 18.5899 5.19159   2
  -5  -8   6 62.7660 3.89352   2
  -5  -8   5 17.6114 4.96482   2
  -5  -8   4 13.3126 5.09018   2
  -5  -8   3 141.676 6.88171   2
  -5  -8   2 41.9444 3.94741   2
  -5   8   1 245.108 4.53026   2
  -5   8   0-1.11002 2.27794   2
  -5  -8  -1 254.292 4.89351   2
  -5  -8  -2 6.12299 2.95209   2
  -5  -8  -3 268.321 6.36355   2
  -5  -8  -4 2.42049 3.21342   2
  -5  -8  -5 29.1907 4.79539   2
  -5  -8  -6 13.2522 4.97802   2
  -5  -8  -7 5.86133 4.26137   2
  -5  -8  -8 1.89113 4.46415   2
  -5  -8  -9 33.3107 6.81673   2
  -5  -8 -10 29.4793 7.06597   2
   5   8  11 8.52317 7.28024   2
  -5  -8 -12-0.83437 7.92133   2
   5   8  13 68.2608 9.89389   2
   5   8  14-4.22008 9.76153   2
   5   8  15 27.2952 14.4654   2
   5   8  16-11.0233 22.6479   2
   5  -9 -16 1.20151 14.4368   2
   5  -9 -15 51.8409 12.2754   2
  -5   9  14-4.10248 7.95500   2
  -5   9  13 17.6187 8.51527   2
  -5  -9  12 5.27925 6.61974   2
  -5   9  11 6.84965 7.39992   2
  -5   9  10 6.99026 9.03635   2
  -5  -9   9 46.8277 9.66230   2
  -5   9   8 2.29075 7.06871   2
  -5  -9   7 196.544 9.68879   2
  -5  -9   6 5.50639 5.30295   2
  -5  -9   5 133.973 5.69070   2
  -5  -9   4 42.1210 4.69924   2
  -5  -9   3 324.401 7.17594   2
  -5  -9   2 4.60736 3.29778   2
  -5   9   1 17.4284 3.33371   2
  -5  -9   0 21.2042 3.30658   2
  -5   9  -1 18.0125 3.11958   2
  -5  -9  -2 1.32659 3.39825   2
  -5  -9  -3 69.5274 6.17235   2
  -5  -9  -4 8.17502 4.47536   2
  -5  -9  -5 60.6937 5.66675   2
  -5  -9  -6 1.36418 4.58745   2
  -5  -9  -7 136.205 8.36204   2
  -5  -9  -8 1.25923 4.77352   2
  -5  -9  -9 117.593 8.17748   2
  -5  -9 -10 6.53438 6.88139   2
  -5  -9 -11 49.7844 8.13444   2
  -5  -9 -12 0.33440 7.43911   2
   5   9  13 11.5927 8.38683   2
   5  -9  14-10.5966 11.4687   2
   5   9  15 13.2968 17.2681   2
   5 -10 -15-2.26641 19.3005   2
   5 -10 -14 18.1663 15.2669   2
  -5  10  13 54.7565 13.7516   2
  -5 -10  12 7.08410 9.82104   2
  -5 -10  11 26.9873 10.2468   2
  -5  10  10 1.56495 9.48059   2
  -5 -10   9 169.677 13.0115   2
  -5  10   8-9.82578 7.83883   2
  -5  10   7 15.1115 8.60867   2
  -5 -10   6 5.75783 5.30609   2
  -5 -10   5 15.1580 5.04083   2
  -5 -10   4 4.06469 4.43219   2
  -5 -10   3 80.6204 4.90885   2
  -5 -10   2 9.00256 3.50546   2
  -5 -10   1 113.079 5.47760   2
  -5 -10   0 5.43618 4.86237   2
  -5 -10  -1 176.764 6.29010   2
  -5 -10  -2-1.35411 4.14357   2
  -5 -10  -3 193.641 7.13409   2
  -5 -10  -4 3.99507 3.86865   2
  -5 -10  -5 29.0346 5.81922   2
  -5 -10  -6 1.87428 5.23549   2
  -5 -10  -7 35.2636 6.25862   2
  -5 -10  -8 17.5214 8.11829   2
  -5 -10  -9 46.6426 8.14671   2
  -5 -10 -10 10.1980 6.87605   2
  -5 -10 -11 27.0711 7.79568   2
  -5 -10 -12-3.23772 8.53809   2
   5 -10  13 77.2539 12.2252   2
   5 -10  14 4.63468 27.8051   2
   5 -10  15 42.7799 30.8882   2
  -5 -11  13 3.35491 27.1930   2
  -5  11  12-7.24328 11.2956   2
  -5 -11  11-8.20908 9.52908   2
  -5  11  10 15.6774 9.93208   2
  -5 -11   9 30.2261 10.1061   2
  -5  11   8 22.4291 9.36626   2
  -5 -11   7 158.063 12.7513   2
  -5  11   6 3.65430 6.84361   2
  -5  11   5 89.8951 8.41301   2
  -5 -11   4 7.19140 6.49741   2
  -5 -11   3 137.961 5.14906   2
  -5 -11   2 5.50220 3.54888   2
  -5 -11   1 13.1969 4.63931   2
  -5 -11   0-0.36706 4.59636   2
  -5 -11  -1 28.5869 5.11166   2
  -5 -11  -2 22.1933 5.10402   2
  -5 -11  -3 51.4169 6.27987   2
  -5 -11  -4 5.46107 5.99002   2
  -5 -11  -5 42.6146 6.87055   2
  -5 -11  -6 3.42642 6.23103   2
  -5 -11  -7 101.950 8.31430   2
  -5 -11  -8 1.57943 7.26577   2
  -5 -11  -9 57.9243 10.3190   2
  -5 -11 -10 19.0815 9.24121   2
  -5 -11 -11 13.9254 8.68971   2
  -5 -11 -12-0.62287 9.56210   2
  -5 -12  11 6.83881 10.7001   2
  -5 -12  10-9.14241 9.71436   2
  -5 -12   9 71.6229 11.6579   2
  -5 -12   8 8.17803 9.96949   2
  -5  12   7-4.04774 7.63190   2
  -5  12   6 2.29615 7.17996   2
  -5  12   5 15.4767 7.19716   2
  -5 -12   4 1.75858 5.60117   2
  -5 -12   3 29.0330 5.96665   2
  -5 -12   2 0.06207 5.03589   2
  -5 -12   1 73.7473 6.60703   2
  -5  12   0 7.26899 5.61371   2
  -5 -12  -1 92.4365 7.97931   2
  -5 -12  -2 0.23174 7.49407   2
  -5 -12  -3 54.1659 8.96447   2
  -5 -12  -4-5.97843 8.07236   2
  -5 -12  -5 2.82677 6.30936   2
  -5 -12  -6-3.47175 6.48636   2
  -5 -12  -7 23.9764 8.71677   2
  -5 -12  -8-2.33247 8.14313   2
  -5 -12  -9 4.27294 8.78065   2
  -5 -12 -10 1.66075 9.25624   2
  -5 -12 -11 3.69522 11.4161   2
  -5 -12 -12-1.89357 16.2404   2
  -5 -13  11 5.63223 29.4422   2
  -5 -13  10 36.4779 16.6065   2
  -5 -13   9 20.9693 10.7354   2
  -5 -13   8 3.71529 10.9688   2
  -5 -13   7 51.8505 9.29195   2
  -5 -13   6 8.01948 7.78236   2
  -5  13   5 35.8376 6.96548   2
  -5  13   4 4.89752 6.01803   2
  -5  13   3 68.8022 6.94554   2
  -5  13   2 8.59147 6.49223   2
  -5  13   1-0.46637 5.92486   2
   5  13   0 23.3693 8.41981   2
  -5 -13  -1 9.17867 7.48954   2
  -5 -13  -2 22.7978 8.61486   2
  -5 -13  -3 27.5516 8.92794   2
  -5 -13  -4 12.1988 8.60825   2
  -5 -13  -5 4.12936 9.17433   2
  -5 -13  -6 8.85837 9.96092   2
  -5 -13  -7 37.6366 9.51581   2
  -5 -13  -8 8.39826 8.76190   2
  -5 -13  -9 16.0553 9.48469   2
  -5 -13 -10-0.79461 11.7590   2
  -5 -13 -11 3.99900 16.9159   2
  -5 -14  10-16.7940 29.5702   2
  -5 -14   9 8.94876 15.9864   2
  -5 -14   8 4.65666 13.5308   2
  -5 -14   7-0.56448 10.0130   2
  -5 -14   6 15.0611 8.63839   2
  -5 -14   5 2.36363 7.88121   2
  -5 -14   4 17.3473 8.13977   2
  -5 -14   3 10.7489 7.25105   2
  -5 -14   2 10.5706 8.38284   2
  -5 -14   1 8.80597 8.96621   2
   5  14   0 1.70066 10.2925   2
  -5 -14  -1 17.4459 7.99556   2
  -5 -14  -2-1.40381 7.89321   2
  -5 -14  -3 21.0739 8.17016   2
  -5 -14  -4 0.66331 9.05651   2
  -5 -14  -5 11.1587 9.17698   2
  -5 -14  -6 3.61887 13.0063   2
  -5 -14  -7 12.3889 11.4617   2
  -5 -14  -8 2.85180 10.6482   2
   5 -14   9 6.96819 18.2928   2
  -5  15   7 6.27997 16.8605   2
  -5 -15   6 4.27542 10.6896   2
  -5 -15   5 3.45400 15.9667   2
  -5 -15   4-13.3094 9.54020   2
  -5 -15   3 10.1637 9.77149   2
  -5 -15   2-1.83807 8.72002   2
  -5 -15   1-3.46564 9.27332   2
   5  15   0 11.0112 10.6059   2
  -5 -15  -1-8.95121 8.84865   2
  -5 -15  -2 13.5991 9.50824   2
  -5 -15  -3 18.3454 8.52940   2
   5  15   4 20.4858 11.8763   2
   5  15   5 12.6614 22.0739   2
   5  15   6-4.46475 22.8130   2
  -5  16   5 1.76322 18.5181   2
  -5  16   4 1.75491 17.7579   2
  -5  16   3 20.7241 19.0223   2
  -5  16   2 24.0360 18.2019   2
  -5  16   1 22.2981 18.4261   2
  -5  16   0-1.74773 17.0811   2
  -5 -16  -1 20.1753 23.4625   2
  -5 -16  -2-16.9455 21.3217   2
  -5 -16  -3-2.32470 21.9895   2
  -6   0  18 29.1909 20.9751   2
  -6   0  16 56.4803 14.0587   2
   6   0 -14 31.5488 12.2626   2
  -6   0  12 179.175 15.9492   2
  -6   0  10 197.841 10.0974   2
  -6   0   8 178.016 8.88310   2
  -6   0   6 98.7315 8.94935   2
  -6   0   4 57.2472 4.92143   2
  -6   0   2 14.4149 2.65066   2
   6   0   0 581.573 11.6715   2
   6   0   2 231.206 8.52279   2
   6   0   4 206.161 13.5244   2
   6   0   6 15.4155 5.92873   2
   6   0   8 1.85458 6.11096   2
   6   0  10 13.4662 9.87689   2
   6   0  12 130.169 11.7379   2
   6   0  14 75.0746 14.7362   2
   6   0  16 81.9700 17.0318   2
  -6  -1  18 69.7109 15.6667   2
  -6  -1  17 4.12310 10.5805   2
  -6   1  16 64.0414 11.1131   2
   6   1 -15-8.33022 8.29530   2
   6   1 -14 35.5471 9.13448   2
   6   1 -13 8.73963 7.92622   2
   6   1 -12 39.7343 6.17056   2
  -6   1  11 2.72386 1.97513   2
   6   1 -10 104.276 5.71947   2
  -6  -1   9-0.52143 3.70584   2
   6   1  -8 55.9875 4.69481   2
  -6  -1   7 0.83086 3.88751   2
  -6  -1   6 415.516 9.37799   2
  -6  -1   5 2.58938 2.81498   2
  -6  -1   4 336.417 6.77028   2
  -6  -1   3 1.41705 2.17773   2
  -6  -1   2 521.887 7.46117   2
  -6  -1   1 2.69583 1.40666   2
  -6  -1   0 36.5734 2.30507   2
   6   1   1 2.14833 2.13854   2
   6   1   2 58.6246 4.18143   2
   6   1   3 14.3800 2.11977   2
   6   1   4 103.654 3.42151   2
   6   1   5 5.54801 2.41064   2
   6   1   6 580.521 8.49120   2
   6  -1   7 3.92533 3.92419   2
   6  -1   8 139.489 10.7158   2
   6  -1   9 9.65458 5.72073   2
   6   1  10 318.143 13.7604   2
   6  -1  11 5.26903 6.93476   2
   6  -1  12 4.20246 7.27017   2
   6  -1  13-1.58997 8.37892   2
   6  -1  14-6.91607 8.48237   2
   6  -1  15 0.57673 9.33683   2
   6  -1  16 10.6534 10.4404   2
   6   1  17-6.23288 13.7616   2
   6   1  18 23.7842 23.6991   2
  -6   2  18 33.9592 22.7970   2
  -6  -2  17 2.67829 11.1002   2
  -6   2  16 10.2467 8.28029   2
   6  -2 -15-0.77762 7.88683   2
   6  -2 -14 14.5349 7.43781   2
  -6  -2  13-0.37097 7.06115   2
  -6   2  12 193.323 7.78618   2
  -6  -2  11-0.41995 3.82114   2
  -6  -2  10 191.229 5.47161   2
   6  -2  -9 2.39359 3.25198   2
  -6  -2   8 198.858 6.44710   2
  -6  -2   7 27.6278 4.96635   2
[truncated: 34,059 more chars]
